# Supplementary material for: Ring-Closing Metathesis Approaches towards the Total Synthesis of Rhizoxins
Source: MDPI journal article supplement (doi:10.3390/molecules25194527), 2020-10-02

## **Supporting Materials**

### **Ring-closing Metathesis Approaches Towards the Total Synthesis of Rhizoxins**

**Marc Liniger, Christian M. Neuhaus, Karl-Heinz Altmann**

**ETH Zürich, Department of Chemistry and Applied Biosciences,  
Institute of Pharmaceutical Sciences, Vladimir-Prelog-Weg 4,  
HCI H405, 8093 Zürich, Switzerland**

**Synthesis protocols and analytical data.**

**$^1\text{H}$ - and  $^{13}\text{C}$ -NMR spectra of new compounds.**

## General Methods

All non-aqueous manipulations were conducted under nitrogen or argon atmosphere in flame-dried glassware, using standard *Schlenk*-, syringe/septa- and/or glovebox techniques (MBraun Labmaster 130).

CH<sub>2</sub>Cl<sub>2</sub> was distilled from CaH<sub>2</sub>; THF, Et<sub>2</sub>O, benzene, toluene were distilled from Na/benzophenone. All other absolute solvents were purchased from Fluka (absolute over molecular sieves). Commercial chemicals were used without further purification, unless otherwise noted.

Solvents for extractions, column chromatography and thin layer chromatography (TLC) were purchased as commercial grade and distilled prior to use. TLC was performed on Merck TLC aluminum sheets (silica gel 60, F254). Spots were visualized with UV light ( $\lambda$  = 254 nm) or through staining with KMnO<sub>4</sub>/K<sub>2</sub>CO<sub>3</sub> or vanillin/H<sub>2</sub>SO<sub>4</sub>. Chromatographic purification of products was performed by flash chromatography (FC) using Fluka silica gel 60 for preparative column chromatography (particle size 40–63  $\mu$ m).

NMR spectra were recorded on a Bruker AV-400 400 MHz or a Bruker AV-500 500 MHz NMR spectrometer at 298 K. NMR spectra are referenced to the residual solvent peak (<sup>1</sup>H 7.26 ppm, <sup>13</sup>C 77.0 ppm for CDCl<sub>3</sub>; <sup>1</sup>H 7.36 ppm, <sup>13</sup>C 128.37 ppm for C<sub>6</sub>D<sub>6</sub>). All <sup>13</sup>C spectra were measured with complete proton decoupling. Spin multiplicities are reported as follows: s = singlet, d = doublet, t = triplet, q = quartet, quint = quintet, sext = sextet, m = multiplet, m<sub>c</sub> = centered multiplet, br = broad signal; *J* = coupling constant in Hz.

Infrared spectra (IR) were recorded on a Jasco FT/IR-6200 instrument. Resonance frequencies are given as wavenumbers in cm<sup>-1</sup>.

Optical rotations were measured on a Jasco P-1020 polarimeter and are reported as follows [ $\alpha$ ]<sub>D</sub><sup>24</sup>: concentration (g/100 mL) and solvent.

High resolution mass spectra (HRMS) were recorded by the ETH Zürich MS service on a Varian IonSpec Ultima (ESI) or a Waters Micromass Autospec Ultima spectrometer (EI). For analytical and semipreparative HPLC the following combination of devices by VWR HITACHI was used: column oven L-2350, diode array detector L-2455, autosampler L-2200, pump L-2130. A Waters Symmetry C18, 3.5  $\mu$ m, 4.6x100 mm column was used for analytical purposes (oven at 40 °C). For semipreparative HPLC a Waters Symmetry C18, 5  $\mu$ m, 7.8x100 mm column was used (room temperature). For preparative HPLC a device by Gilson equipped with a Waters SymmetryPrep C18, 5  $\mu$ m, 19x100 mm column was used (room temperature).

Diastereomeric ratios (*dr*) are based on intensity ratios of relevant signals in the  $^1\text{H}$ -NMR spectrum of the diastereomeric mixture.

When products could not be (fully) separated from specific known impurities or contained significant amounts of solvent, yields were approximated from the w/w ratio of product vs impurity/solvent based on the intensity ratio(s) of signals in the  $^1\text{H}$ -NMR spectrum.

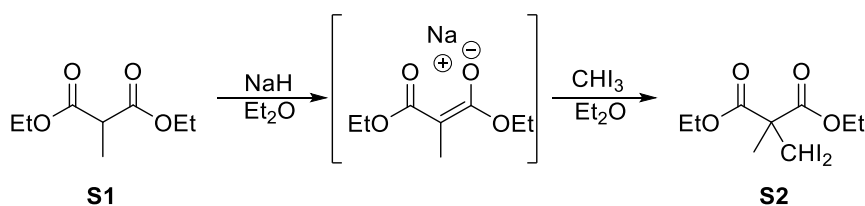

**Diethyl 2-(diiodomethyl)-2-methylmalonate (S2):** To a suspension of NaH (5.51 g 60% dispersion in mineral oil, 138 mmol, 1.20 eq) in Et<sub>2</sub>O (70 mL) was added a solution of diethyl methylmalonate (**S1**) (19.8 mL, 115 mmol, 1.00 eq) in Et<sub>2</sub>O (80 mL) over 1 h with mechanical stirring. Gas evolution could be observed and a grayish slurry was formed over time. After another 40 min at rt, the mixture was heated to reflux (bath. temp. 45 °C) for 3 h. Then it was cooled to rt in a water bath and CHI<sub>3</sub> (45.2 g, 115 mmol, 1.00 eq) was added over ca. 10 min, whereupon the suspension turned less viscous. The yellow reaction mixture was heated to reflux for 24 h. The yellow colour faded slowly over time and became beige in the end. The suspension was cooled to 0 °C, 2 M HCl (100 mL) was added and the orange solution was stirred at rt for ca. 30 min. Then the layers were separated and the aqueous phase was extracted with Et<sub>2</sub>O (3×30 mL). The combined organic layers were washed with brine, dried over MgSO<sub>4</sub> and concentrated *in vacuo*. Crude **S2** (50.5 g, dark brown liquid) was used without purification.

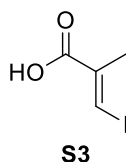

**(E)-3-Iodo-2-methylacrylic acid (S3):** The crude diester **S2** (50.5 g, ca. 0.115 mol) was dissolved in EtOH/H<sub>2</sub>O (320 mL, 3:1) and KOH (16.7 g, 0.298 mol, ca. 2.6 eq) was added. The mixture was heated to reflux (bath temp. = 97 °C) for 24 h. After cooling to rt, ethanol was removed under reduced pressure. The so obtained suspension was diluted with Na<sub>2</sub>CO<sub>3</sub> (sat. aq.). The basic solution was extracted with Et<sub>2</sub>O (3×100 mL). Then it was acidified (pH≤1) with conc. HCl and extracted with CH<sub>2</sub>Cl<sub>2</sub>. The combined extracts were washed with brine, dried over MgSO<sub>4</sub> and concentrated *in vacuo*. The brown crude was purified by column chromatography (CH<sub>2</sub>Cl<sub>2</sub>:MeOH 40:1→15:1) to afford the desired vinyl iodide **S3** (17.5 g, 72% over two steps) as an amber liquid.

**<sup>1</sup>H-NMR** (CDCl<sub>3</sub>, 400.1 MHz): δ = 8.02 (m, *CH*=C), 2.06 (d, *J* = 1.1 Hz, 3H, CH<sub>3</sub>).



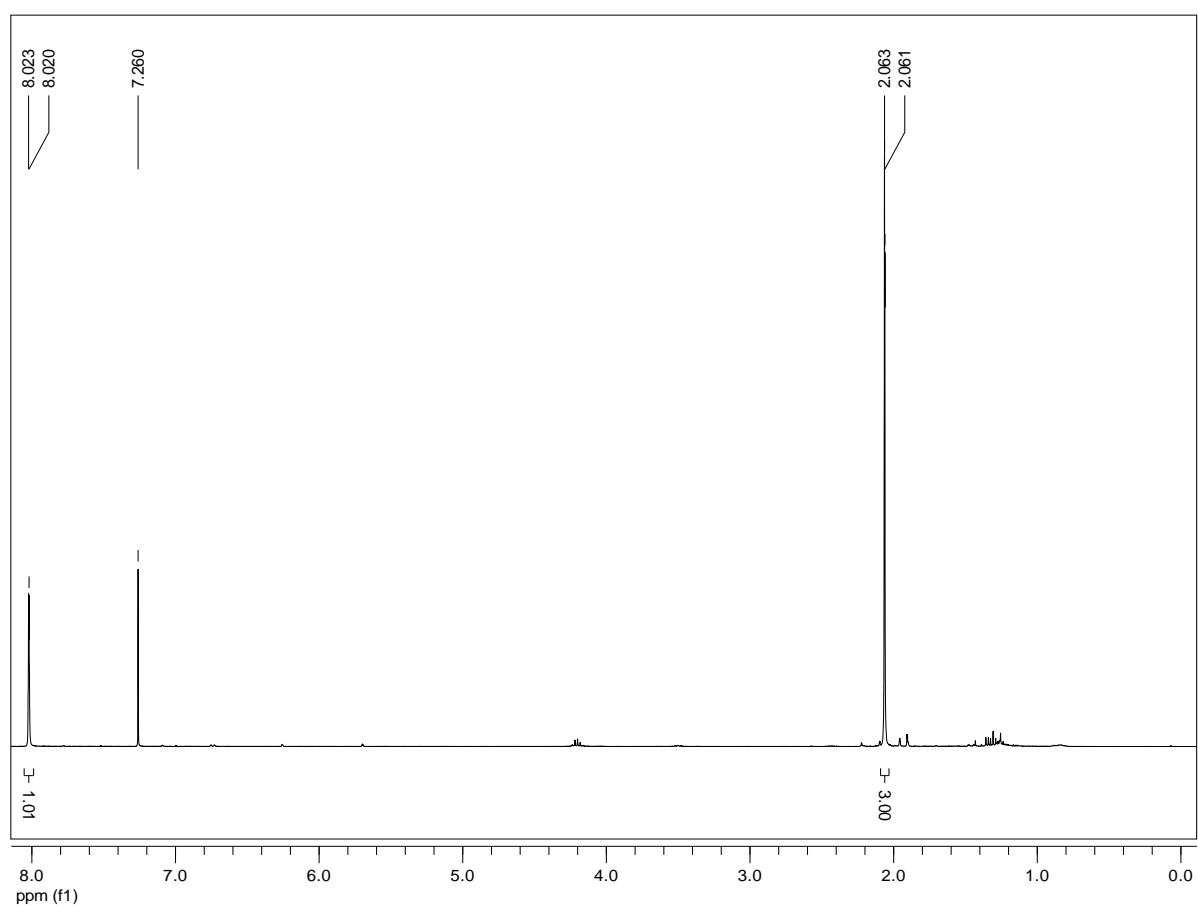

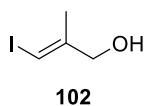

**(E)-3-Iodo-2-methylprop-2-en-1-ol (102):** To a solution of the acid **S3** (17.5 g, 82.6 mmol, 1.00 eq) in Et<sub>2</sub>O (160 mL) was added LiAlH<sub>4</sub> (3.13 g 95% as LAH, 82.5 mmol, 1.00 eq) portionwise at 0 °C. Vigorous gas evolution was observed. The suspension was stirred at 0 °C for 1 h 15 min and was then allowed to warm to rt. After 1 h 35 min, the gray suspension was re-cooled to 0 °C, the reaction was quenched with water (some Na<sub>2</sub>SO<sub>4</sub> (s) added before) and acidified with H<sub>2</sub>SO<sub>4</sub> (2 M, 100 mL). The layers were separated and the aqueous phase was extracted with CH<sub>2</sub>Cl<sub>2</sub> (4×40 mL). The combined organic extracts were washed with brine, dried over MgSO<sub>4</sub> and concentrated under reduced pressure. The crude was purified by column chromatography (pent:Et<sub>2</sub>O 2:1→1:1) to afford the desired alcohol **102** (14.3 g, 87%) as a nearly colourless liquid.

**TLC** (SiO<sub>2</sub>, pent:Et<sub>2</sub>O 4:1): R<sub>f</sub> = 0.27 (smears)

**<sup>1</sup>H-NMR** (CDCl<sub>3</sub>, 400.1 MHz): δ = 6.29 (mc, 1H), 4.13 (bs, 2H), 1.85 (s, 3H).

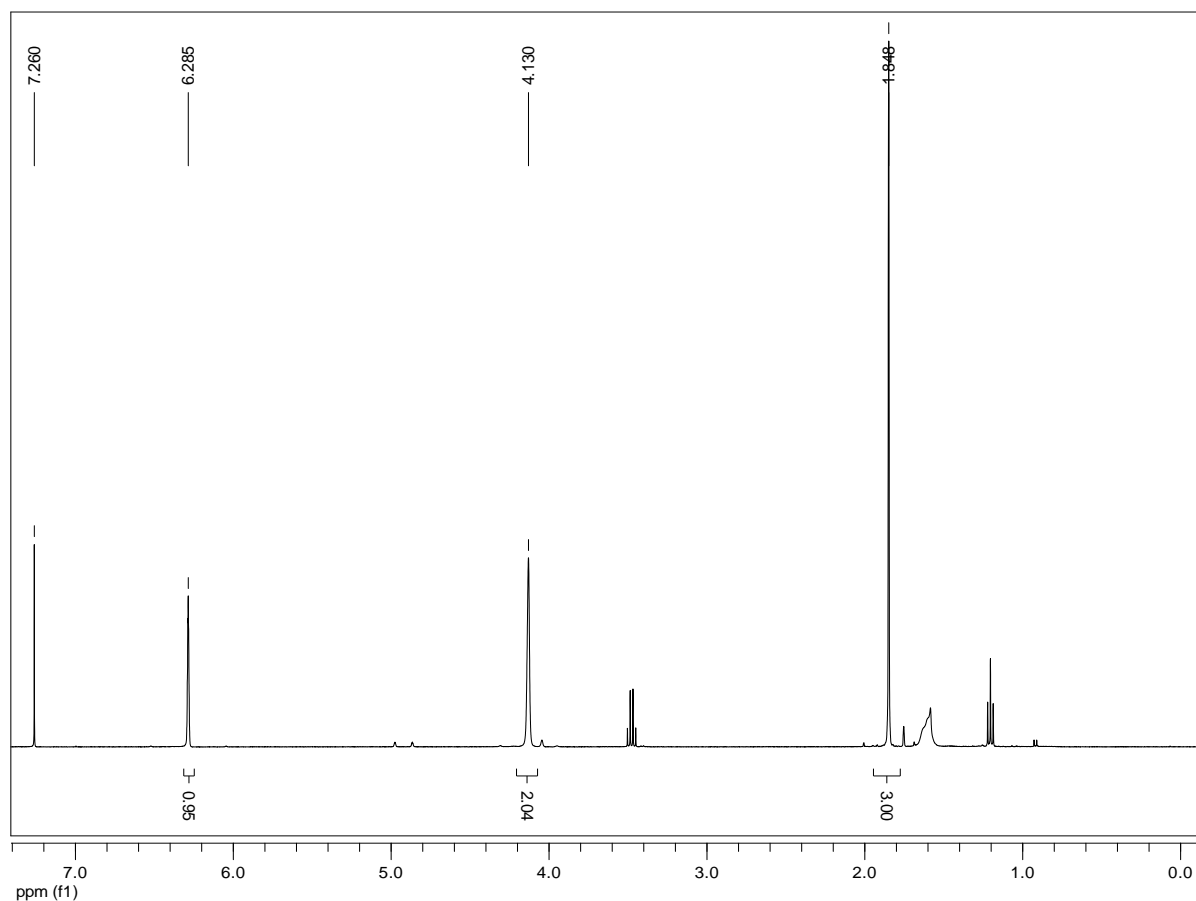

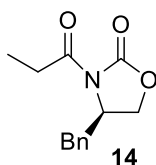

**(R)-4-Benzyl-3-propionyloxazolidin-2-one (14):** To a solution of the commercially available oxazolidinone **S4** (5.00 g, 28.2 mmol, 1.00 eq) in THF (120 mL) was added *n*-BuLi (19.4 mL 1.6 M in Hexanes, 31.0 mmol, 1.10 eq) dropwise at  $-78^{\circ}\text{C}$ . The resulting dark orange solution was aged at  $-78^{\circ}\text{C}$  for 35 min. Then propionyl chloride (4.93 mL, 56.4 mmol, 2.00 eq) was added at  $-78^{\circ}\text{C}$ . The dark colour discharged rapidly. The mixture was stirred for further 2 h 20 min at  $-78^{\circ}\text{C}$ . Then  $\text{Na}_2\text{CO}_3$  (sat. aq., 30 mL) was added to quench the remaining propionyl chloride and the mixture was diluted with NaCl (sat. aq., 15 mL) and EtOAc (20 mL). The layers were separated and the aqueous phase was extracted with EtOAc (3×20 mL). The combined organic layers were washed with brine, dried over  $\text{MgSO}_4$  and concentrated *in vacuo*. The crude was purified by column chromatography ( $\text{CH}_2\text{Cl}_2$ :acetone 15:1) to afford the title compound as a yellow oil, which crystallised in a freezer ( $-18^{\circ}\text{C}$ ). The material was recrystallised from hex:EtOAc (ca. 10:1, some hexane added). The yellow mother liquor was discarded and the crystals were washed with cold hexane to afford the title compound **14** (5.97 g, 91%) in colourless needles.

**TLC** ( $\text{CH}_2\text{Cl}_2$ :acetone 15:1):  $R_f = 0.70$

**$^1\text{H-NMR}$**  ( $\text{CDCl}_3$ , 400.1 MHz):  $\delta = 7.38\text{--}7.27$  (m, 3H), 7.24–7.16 (m, 2H), 4.68 (m<sub>c</sub>, 1H), 4.25–4.12 (m, 2H), 3.31 (dd,  $J = 3.3$  Hz,  $J = 13.4$  Hz, 1H), 2.96 (dd,  $J = 7.3$  Hz,  $J = 9.3$  Hz, 1H), 2.96 (m<sub>c</sub>, 1H), 2.77 (dd,  $J = 9.6$  Hz,  $J = 13.4$  Hz, 1H), 1.21 (t,  $J = 7.3$  Hz, 3H).

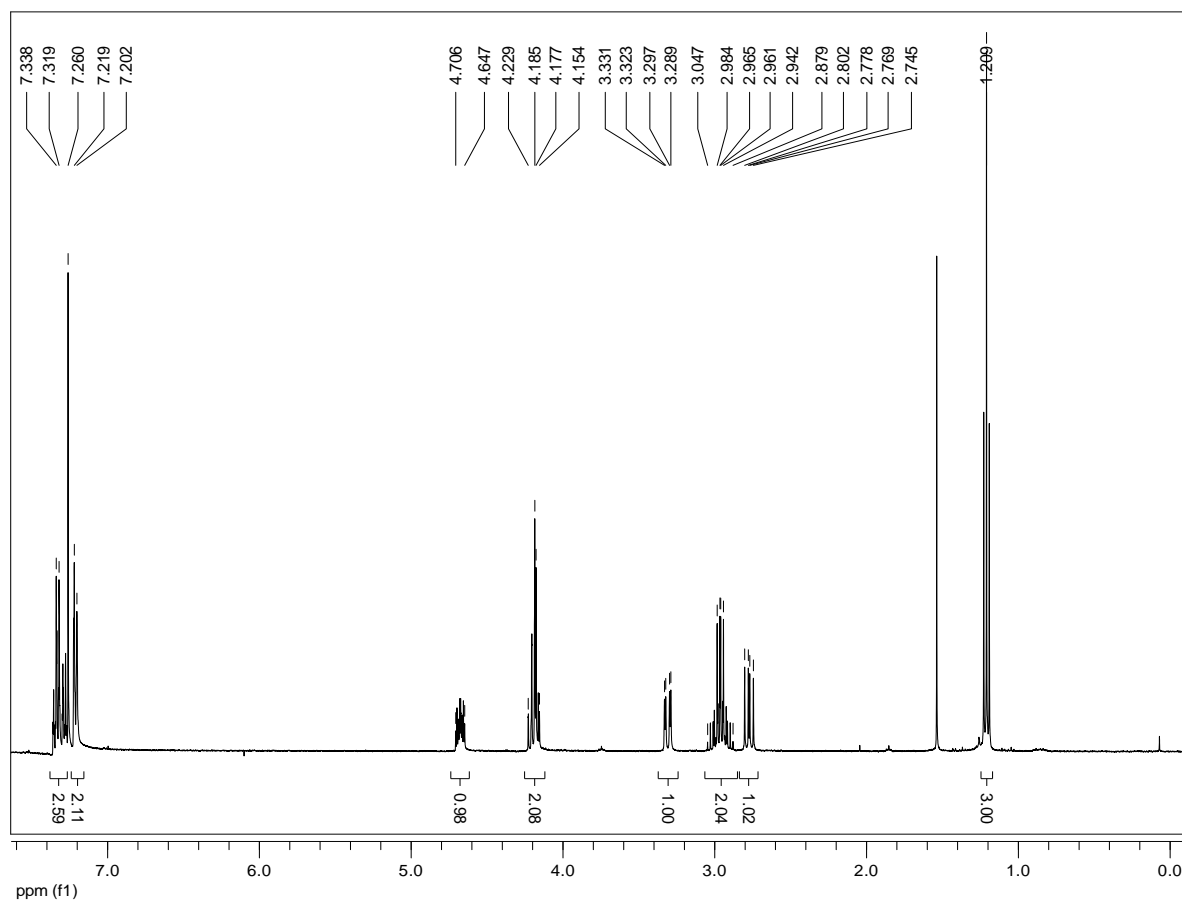

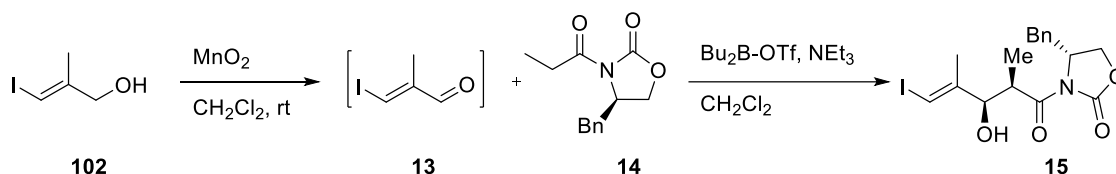

**(*R*)-4-Benzyl-3-((2*R*,3*R*,*E*)-3-hydroxy-5-iodo-2,4-dimethylpent-4-enoyl)-oxazolidin-2-one (**15**):**

Preparation of the aldehyde: To a solution of the allylic alcohol **102** (7.51 g, 37.9 mmol, 1.00 eq) in CH<sub>2</sub>Cl<sub>2</sub> (140 mL) were added 3 Å molecular sieves beads and activated MnO<sub>2</sub> (66.0 g, 759 mmol, 20.0 eq) at rt. The suspension was stirred for ca. 2 h at the same temperature. Then it was diluted with CH<sub>2</sub>Cl<sub>2</sub> and filtered through a pad of Celite, topped with a few mm of basic alox. The filter was washed thoroughly with CH<sub>2</sub>Cl<sub>2</sub>. The combined filtrates were concentrated under reduced pressure to a volume of ca. 55 mL and the crude aldehyde **13** was used directly in the following reaction.

Evans Aldol: To a solution of the *Evans* oxazolidinone **14** (5.90 g, 25.3 mmol, 1.00 eq) in CH<sub>2</sub>Cl<sub>2</sub> (50 mL) was added Bu<sub>2</sub>BOTf (29.0 mL 1.0 M in hexanes, 29.0 mmol, 1.15 eq) portionwise over ca. 30 min at 0 °C. The resulting brownish solution was aged for 5-10 min, then NEt<sub>3</sub> (4.57 mL, 32.9 mmol, 1.30 eq) was added dropwise over ca. 5 min. The brown colour faded and the mixture turned pale yellow (nearly colourless). The mixture was aged for 5-10 min and then cooled to -78 °C. After a few minutes stirring at -78 °C, a precooled (-78 °C) solution of the aldehyde **13** (ca. 37.9 mmol, 1.50 eq) in CH<sub>2</sub>Cl<sub>2</sub> (ca. 55 mL) was added *via* cannula in several portions. The resulting pale yellow solution was stirred at the same temperature for 2 h and for 45 min at 0 °C, the yellow colour darkening, before it was quenched by the addition of pH 7 buffer. Afterwards the mixture was stored in a freezer over the weekend. Subsequently, MeOH (60 mL) and 30% H<sub>2</sub>O<sub>2</sub>:MeOH 1:3 (60 mL) were added at 0 °C and the mixture was stirred at the same temperature for 1 h. The organic solvents were removed at the rotavap. The dark brown residue was diluted with water (120 mL) and CH<sub>2</sub>Cl<sub>2</sub> (50 mL) and the layers were separated. The aqueous phase was extracted with CH<sub>2</sub>Cl<sub>2</sub> (3×50 mL). The combined organic extracts were washed with Na<sub>2</sub>S<sub>2</sub>O<sub>3</sub> (sat. aq., discoloured the brown layer on shaking), and brine, dried over MgSO<sub>4</sub> and concentrated at the rotavap. The crude was purified by column chromatography (CH<sub>2</sub>Cl<sub>2</sub>:Et<sub>2</sub>O 20:1→10:1) to afford the desired product **15** as amber crystals (9.94 g, 92%).

**$^1\text{H-NMR}$**  ( $\text{CDCl}_3$ , 400.1 MHz):  $\delta$  = 7.38-7.27 (m, 3H), 7.23-7.17 (m, 2H), 6.43 (bs, 1H), 4.70 ( $\text{m}_\text{c}$ , 1H), 4.51 (bs, 1H), 4.31-4.16 (m, 2H), 4.00 ( $\text{m}_\text{c}$ , 1H), 3.26 (dd,  $J$  = 3.3 Hz,  $J$  = 13.4 Hz, 1H), 3.14 (d,  $J$  = 2.8 Hz, 1H), 2.80 (dd,  $J$  = 9.4 Hz,  $J$  = 13.4 Hz, 1H), 1.81 (s, 3H), 1.18 (d,  $J$  = 7.0 Hz, 3H).

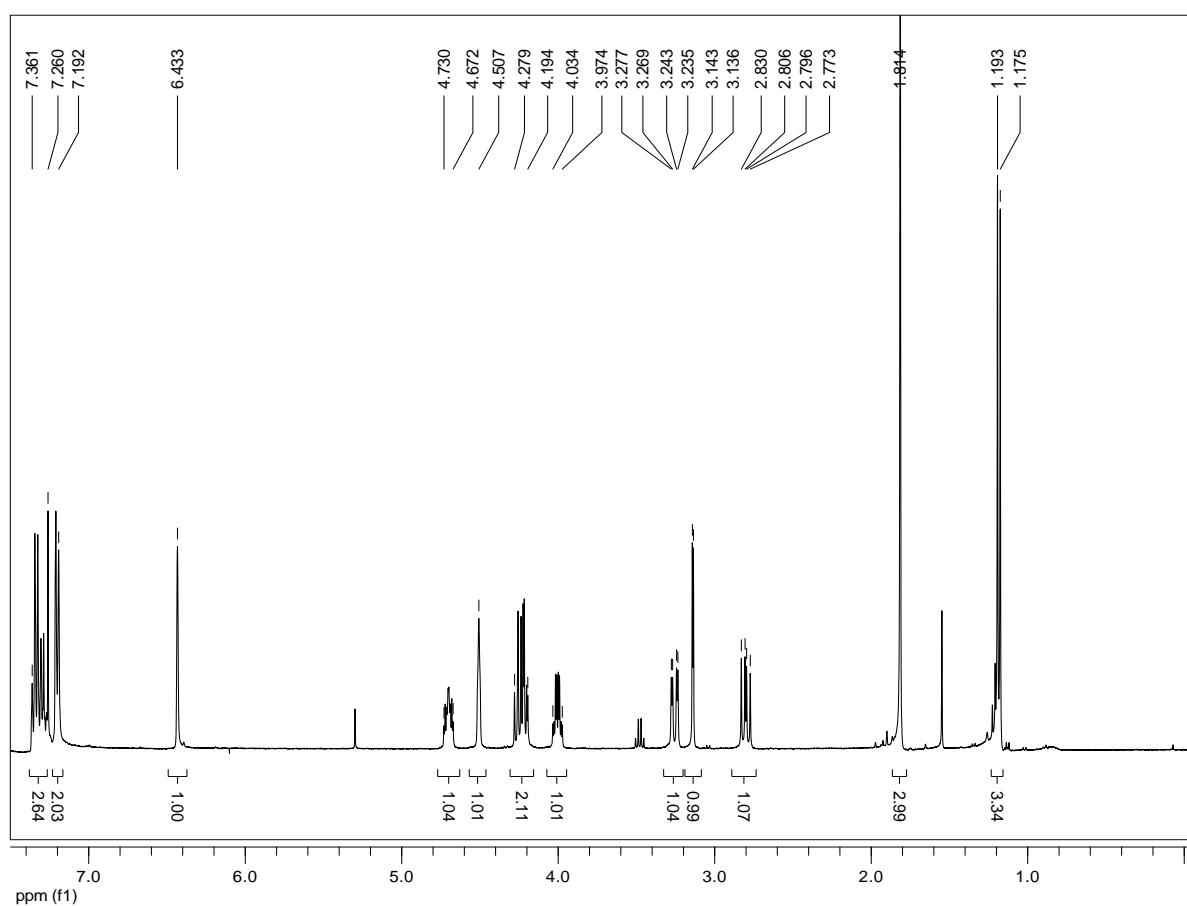

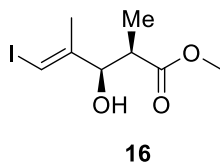

**Methyl (2*R*,3*R*,*E*)-3-hydroxy-5-iodo-2,4-dimethylpent-4-enoate (**16**):** To a solution of the *Evans* aldol adduct **15** (711 mg, 1.66 mmol, 1.00 eq) in CH<sub>2</sub>Cl<sub>2</sub> (15 mL) was added NaOMe (4.56 mL 0.4 M in MeOH, 1.82 mmol, 1.10 eq) over 12 min at 0 °C. The mixture was aged for 13 min, then the reaction was quenched into ice cold NH<sub>4</sub>Cl (sat. aq.). The layers were separated and the aqueous phase was extracted with CH<sub>2</sub>Cl<sub>2</sub> (3×15 mL). The combined organic extracts were washed with brine, dried over MgSO<sub>4</sub> and concentrated *in vacuo*. The crude was purified by column chromatography (CH<sub>2</sub>Cl<sub>2</sub>:Et<sub>2</sub>O 20:1) to afford the desired ester **16** (487 mg, 92% wt/wt along with CH<sub>2</sub>Cl<sub>2</sub>, 446 mg, 95%) as a pale yellow liquid.

**TLC** (Hex:EtOAc 10:1): *R<sub>f</sub>* = 0.17

**<sup>1</sup>H-NMR** (CDCl<sub>3</sub>, 400.1 MHz): δ = 6.39 (m<sub>c</sub>, 1H), 4.49 (m<sub>c</sub>, 1H), 3.71 (s, 3H), 2.70 (qd, *J* = 7.2 Hz, *J* = 4.1 Hz, 1H), 2.72 (d, *J* = 3.3 Hz, 1H), 1.79 (m<sub>c</sub>, 3H), 1.12 (d, *J* = 7.1 Hz, 3H);

**<sup>13</sup>C-NMR** (CDCl<sub>3</sub>, 100.6 MHz): δ = 175.8, 145.9, 79.3, 75.8, 52.1, 42.2, 21.1, 10.5.

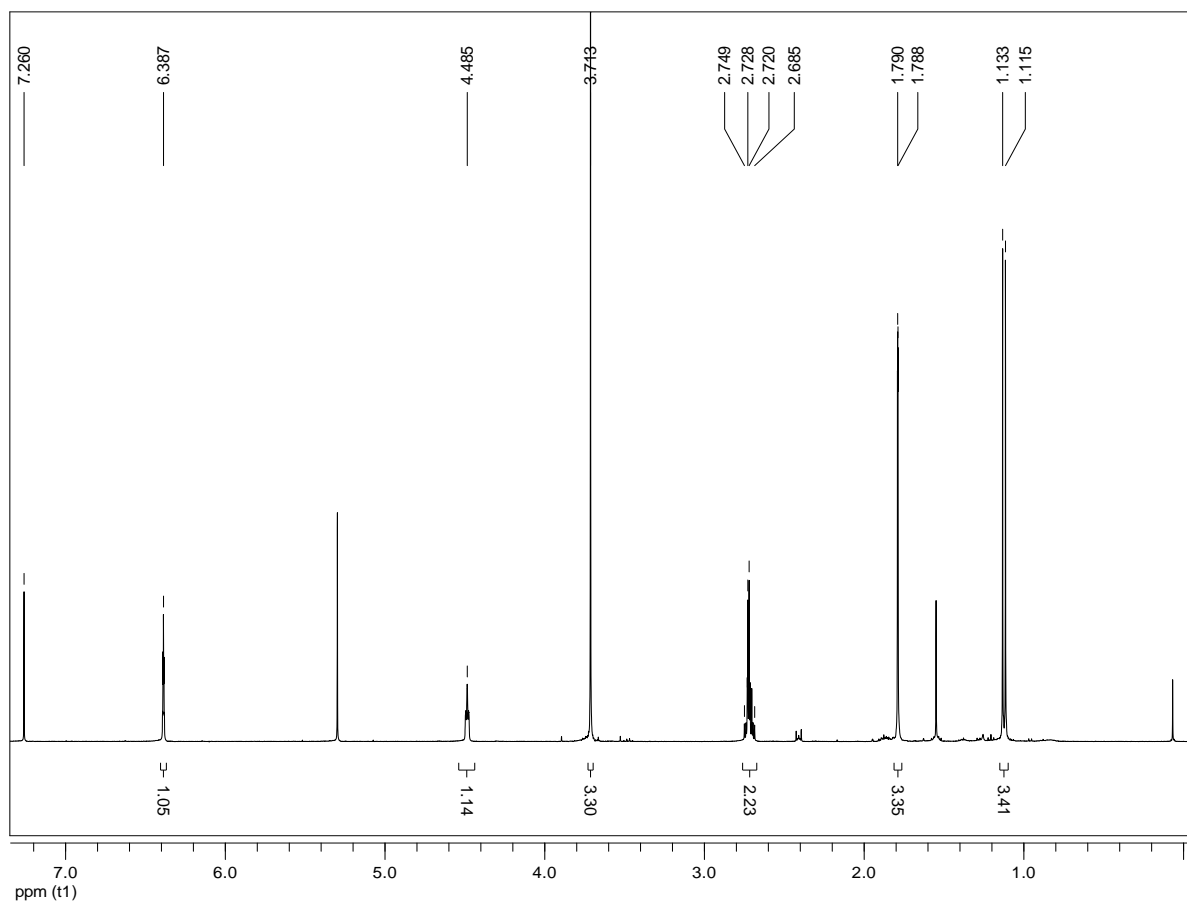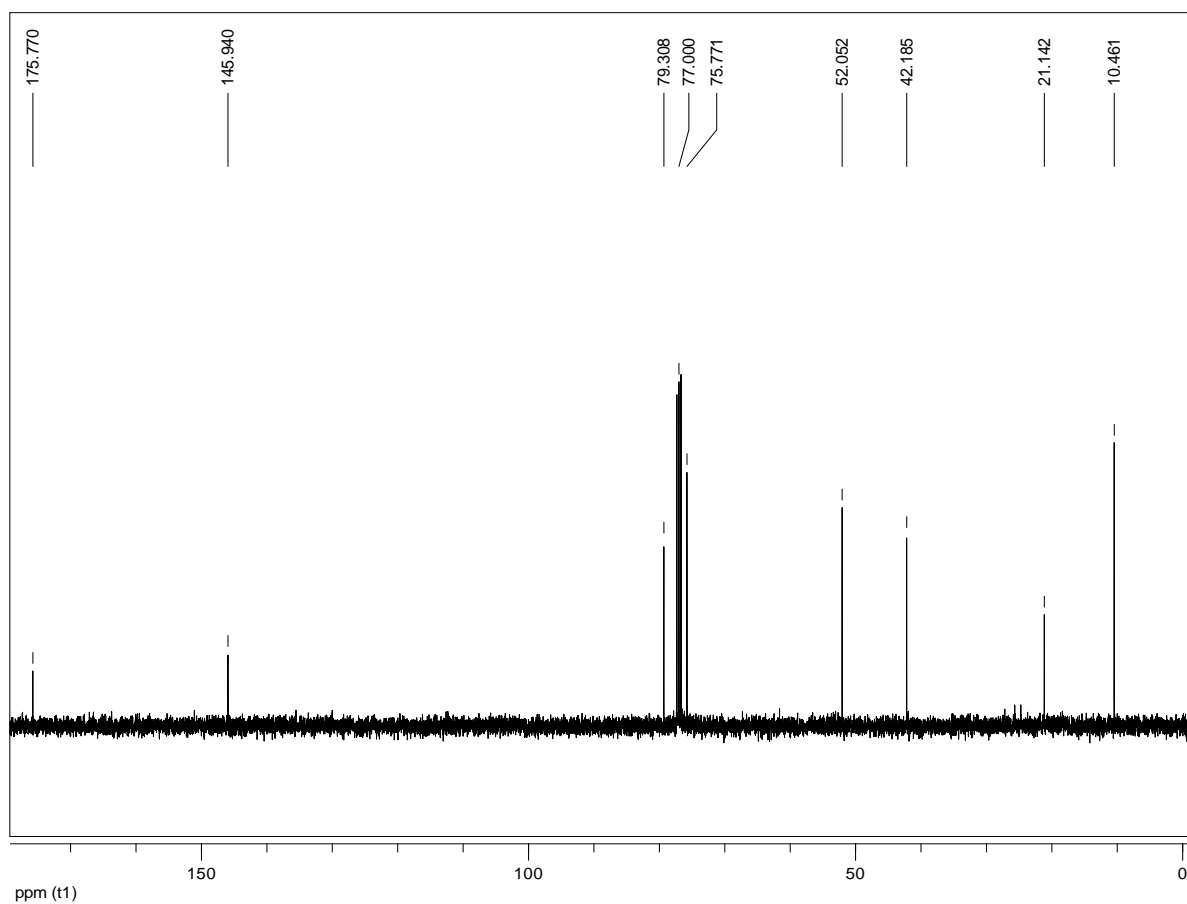



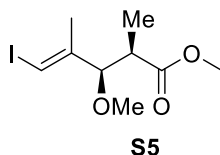

**Methyl (2*R*,3*R*,*E*)-5-iodo-3-methoxy-2,4-dimethylpent-4-enoate (S5):** To a cooled (0 °C) solution of the alcohol **16** (55.0 mg, 0.194 mmol, 1.00 eq) and MeI (0.121 mL, 1.94 mmol, 10.0 eq) in THF/DMF (3:1, 2 mL) was added NaH (7.00 mg, 0.291 mmol, 1.50 eq). A pale yellow precipitate formed instantaneously. The slurry was stirred for 1 h 10 min at 0 °C. Then the reaction was quenched with pH 7 phosphate buffer (3 *Pasteur* pipettes). CH<sub>2</sub>Cl<sub>2</sub> was added and the layers were separated. The aqueous phase was extracted with CH<sub>2</sub>Cl<sub>2</sub> (3×10 mL). The combined organic extracts were washed with brine, dried over MgSO<sub>4</sub> and concentrated under reduced pressure. The crude was purified by column chromatography (hex:Et<sub>2</sub>O 15:1) to afford the desired product **S5** (54.0 mg, 94%) as a colourless liquid.

**TLC** (hex:EtOAc 10:1): *R<sub>f</sub>* = 0.56

**<sup>1</sup>H-NMR** (CDCl<sub>3</sub>, 400.1 MHz): δ = 6.22 (m, 1H), 3.79 (d, *J* = 8.0 Hz, 1H), 3.64 (s, 3H), 3.22 (s, 3H), 2.68 (qd, *J* = 6.9 Hz, *J* = 8.0 Hz, 1H), 1.76 (d, *J* = 1.1 Hz, 3H), 1.20 (d, *J* = 6.9 Hz, 3H).

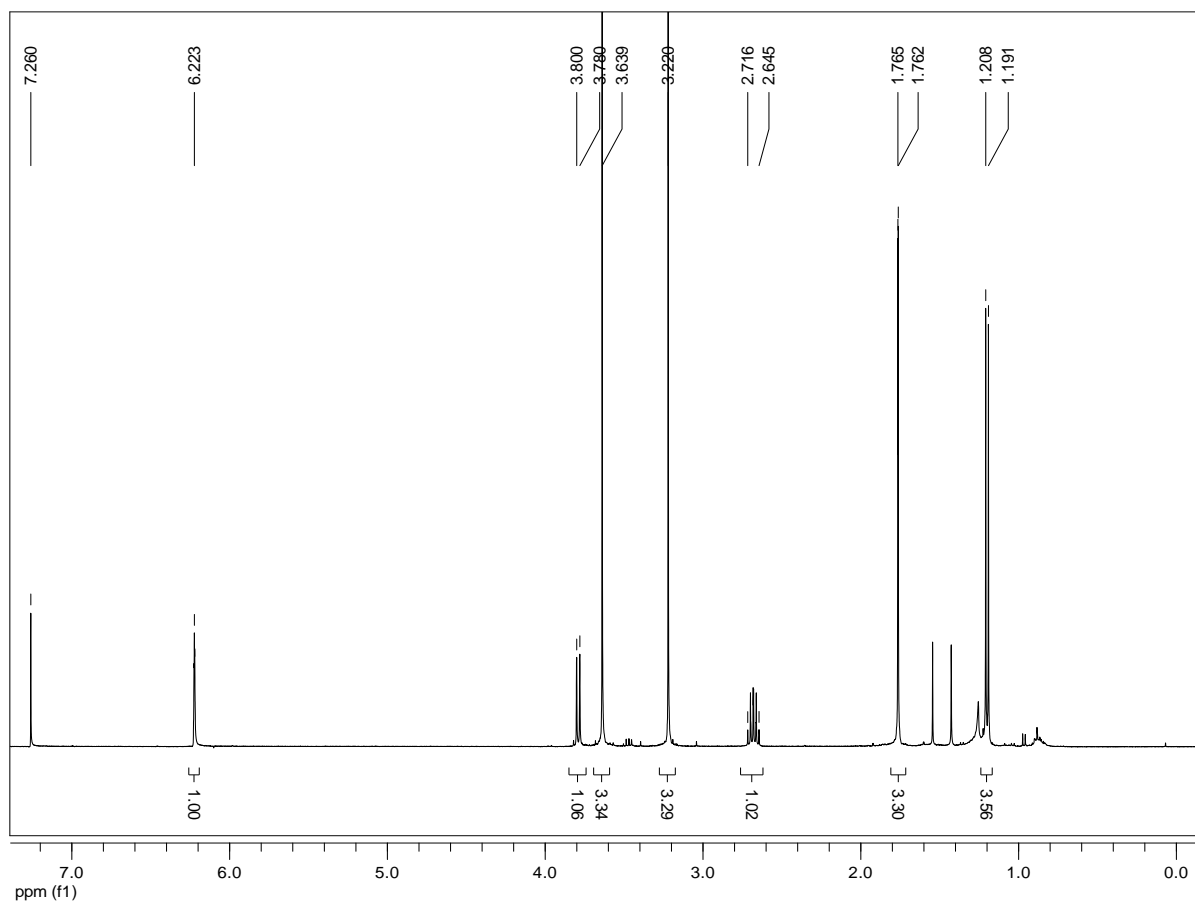

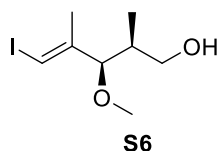

**(2*S*,3*R*,*E*)-5-Iodo-3-methoxy-2,4-dimethylpent-4-en-1-ol (S6):** To a solution of the ester **S5** (50 mg, 0.168 mmol, 1.00 eq) in CH<sub>2</sub>Cl<sub>2</sub> (1.8 mL) was added DIBAL (0.352 mL 1 M in CH<sub>2</sub>Cl<sub>2</sub>, 0.352 mmol, 2.10 eq) dropwise at −78 °C. The mixture was stirred for 20 min at the same temperature and was then allowed to warm to 0 °C. After 1 h the reaction was quenched by successive addition of MeOH (0.1 mL), H<sub>2</sub>O (0.30 mL), 10% aq NaOH (0.30 mL) and H<sub>2</sub>O (0.90 mL). The aqueous phase was diluted with water, the layers were separated and the aqueous phase was extracted with CH<sub>2</sub>Cl<sub>2</sub> (3×2 mL). The combined organic extracts were washed with brine, dried over MgSO<sub>4</sub> and concentrated under reduced pressure. The crude was filtered through a pad of silica (Et<sub>2</sub>O as eluent) and concentrated again to afford the desired alcohol **S6** (44.1 mg, 97%) as a colourless oil which was used for the next step without purification.

**TLC** (Hex:EtOAc 5:1):  $R_f$  = 0.20

**<sup>1</sup>H-NMR** (CDCl<sub>3</sub>, 400.1 MHz):  $\delta$  = 6.20 (m, 1H), 3.67 (d,  $J$  = 6.2 Hz, 1H), 3.53 (m, 2H), 3.24 (s, 3H), 1.87 (m, 1H), 1.77 (d,  $J$  = 1.0 Hz, 3H), 1.71 (t,  $J$  = 5.2 Hz, 1H), 1.20 (d,  $J$  = 6.9 Hz, 3H).

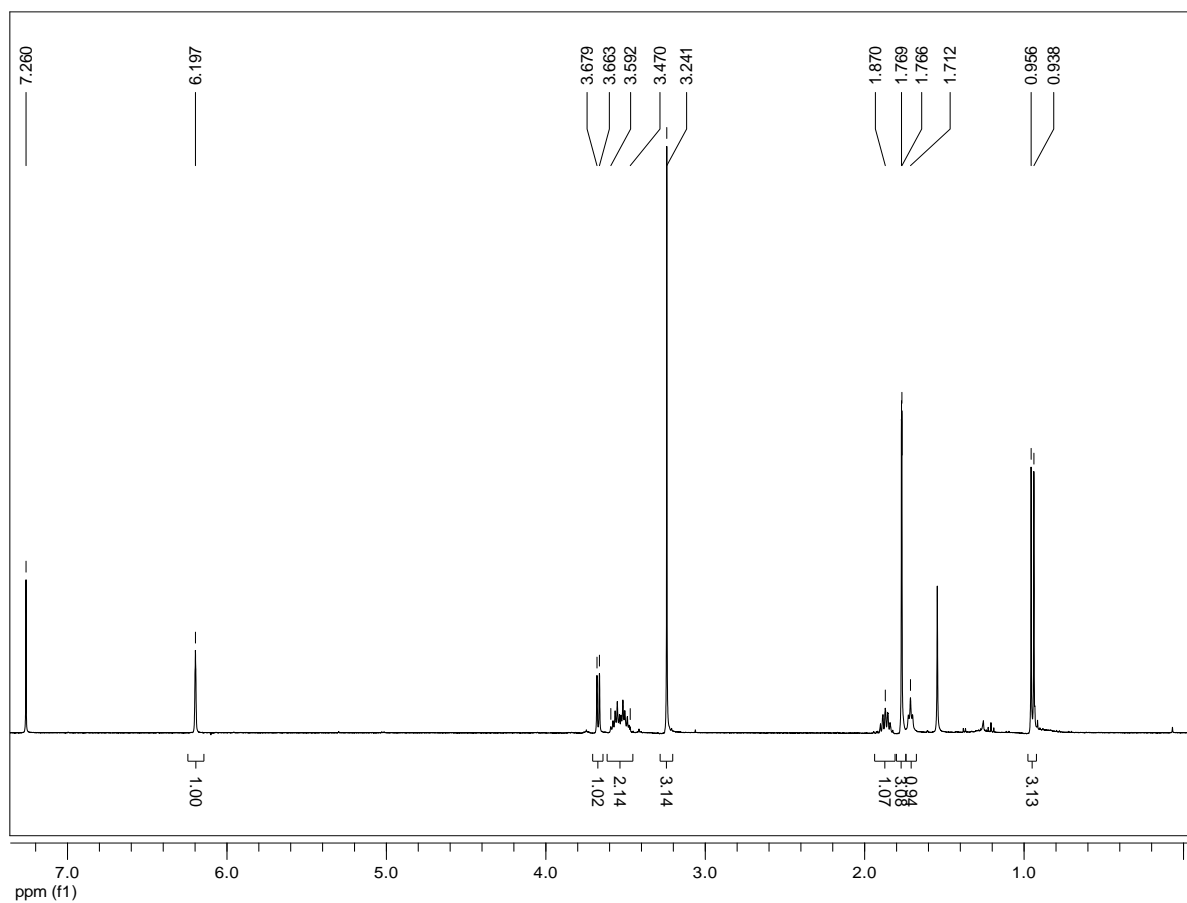

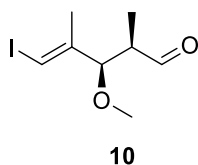

**(2R,3R,E)-5-Iodo-3-methoxy-2,4-dimethylpent-4-enal (10):** To a cooled (0 °C) solution of the alcohol **S6** (41.7 mg, 0.154 mmol, 1.00 eq) in CH<sub>2</sub>Cl<sub>2</sub> (1.5 mL) were added NaHCO<sub>3</sub> (16.9 mg, 0.201 mmol, 1.30 eq) and *Dess-Martin* periodinane (42.6 mg, 0.100 mmol, 0.65 eq). The suspension was allowed to warm to rt. After 25 min, the mixture was re-cooled to 0 °C again and more DMP (42.6 mg, 0.100 mmol, 0.65 eq) was added. The cooling was removed again and the reaction was stirred at rt for a further 45 min. Since there was still little starting material left, more DMP (0.2 eq) and NaHCO<sub>3</sub> (small spatula) were added. After another 20 min stirring at rt, the reaction was quenched with Na<sub>2</sub>S<sub>2</sub>O<sub>3</sub> (sat. aq.) and NaHCO<sub>3</sub> (sat. aq.). The layers were separated and the aqueous phase was extracted with CH<sub>2</sub>Cl<sub>2</sub> (3×2 mL). The combined organic extracts were washed with NaHCO<sub>3</sub> (sat. aq., 3×) and with brine, dried over MgSO<sub>4</sub> and concentrated under reduced pressure. The residue was taken up in pentane and the resulting suspension was filtered through celite in a pipette. The filtrate was evaporated under reduced pressure to afford the desired aldehyde **10** (42.7 mg, >100%, dr = 25/1) as a brownish liquid, which was used in the next step without further purification.

**<sup>1</sup>H-NMR** (CDCl<sub>3</sub>, 400.1 MHz): δ = 9.66 (d, *J* = 1.5 Hz, 1H), 6.29 (mc, 1H), 4.00 (d, *J* = 5.6 Hz, 1H), 3.25 (s, 3H), 2.55 (mc, 1H), 1.77 (d, *J* = 1.1 Hz, 3H), 1.09 (d, *J* = 7.0 Hz, 3H).

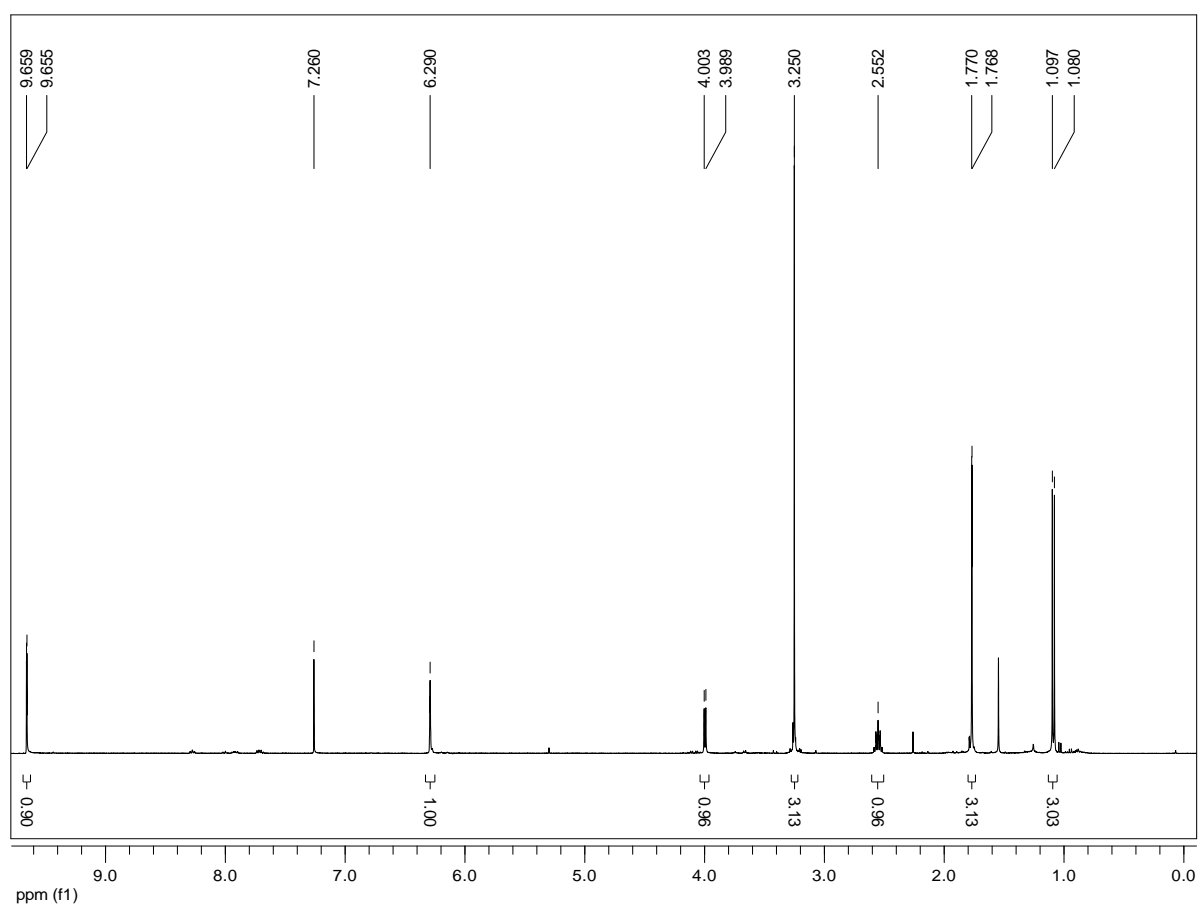

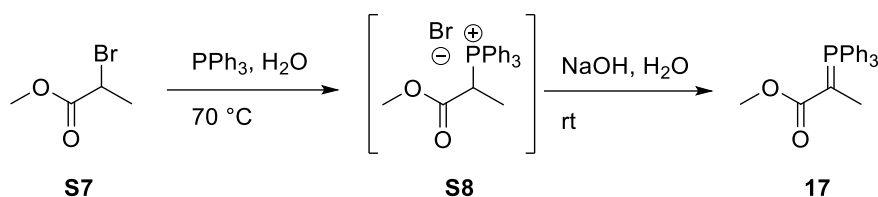

**Methyl 2-(triphenyl-*l*5-phosphaneylidene)propanoate (17):** A mixture of methyl-2-bromopropionate (**S7**) (2.00 mL, 17.9 mmol, 1.10 eq) and triphenylphosphine (4.27 g, 16.3 mmol, 1.00 eq) in water (18.0 mL) was stirred at 70 °C for 2.5 h. Both the aqueous and the organic layer still contained PPh<sub>3</sub>. The temperature was raised to 80 °C and the mixture was stirred for further 2 h. According to TLC, there was still a considerable amount of PPh<sub>3</sub>. Therefore, the mixture was stirred at 75 °C overnight. After totally 23 h the mixture was allowed to cool to rt. Afterwards aqueous NaOH (38 mL 1 M, 2.3 eq) was added, which led to the immediate precipitation of a yellow solid. The suspension was stirred for 5 min, then CH<sub>2</sub>Cl<sub>2</sub> (50 mL) was added and the layers were separated. The aqueous phase was extracted with CH<sub>2</sub>Cl<sub>2</sub> (2×50 mL), washed with brine, dried over MgSO<sub>4</sub> and concentrated under reduced pressure. The crude was obtained as a yellow oil, which turned into a solid upon addition of pentane. The solid was washed with hexane (3×20 mL) and dried *in vacuo* to afford phosphonium ylide **17** (5.48 g, 97%) as a slightly yellow powder.

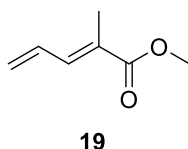

**Methyl (E)-2-methylpenta-2,4-dienoate (19):** To a solution of the phosphonium ylide **17** (62.1 g, 178 mmol, 1.00 eq) in CH<sub>2</sub>Cl<sub>2</sub> (230 mL) was added acrolein (**18**) (11.9 mL, 178 mmol, 1.00 eq) dropwise at rt. The addition was ceased from time to time due to excessive boiling of the mixture. After the addition, the yellow solution was heated (47 °C oil bath) to maintain a gentle reflux. After 3 h, the mixture was allowed to cool to rt and stored overnight. Then it was concentrated under reduced pressure (*Vigreux*, short path distillation, "Hausvakuum", 55 °C oil bath), which took several hours. The concentrate was then cooled to 0 °C, pentane was added, the resulting suspension was filtered and the filter cake was washed with pentane. The combined filtrates were concentrated (*Vigreux*, short

path distillation, 50 °C oil bath) and the crude was purified by distillation (75-77 ° oil bath, 20 mbar, bp = 59-60 °C) to afford **19** as a colourless liquid (70%).

**<sup>1</sup>H-NMR** (CDCl<sub>3</sub>, 400.1 MHz):  $\delta$  = 7.17 (m<sub>c</sub>, 1H), 6.66 (ddd,  $J$  = 10.1 Hz,  $J$  = 11.3 Hz,  $J$  = 16.8 Hz, 1H), 5.56 (m<sub>c</sub>, 1H), 5.45 (m<sub>c</sub>, 1H), 3.77 (s, 3H), 1.96 (m<sub>c</sub>, 3H).

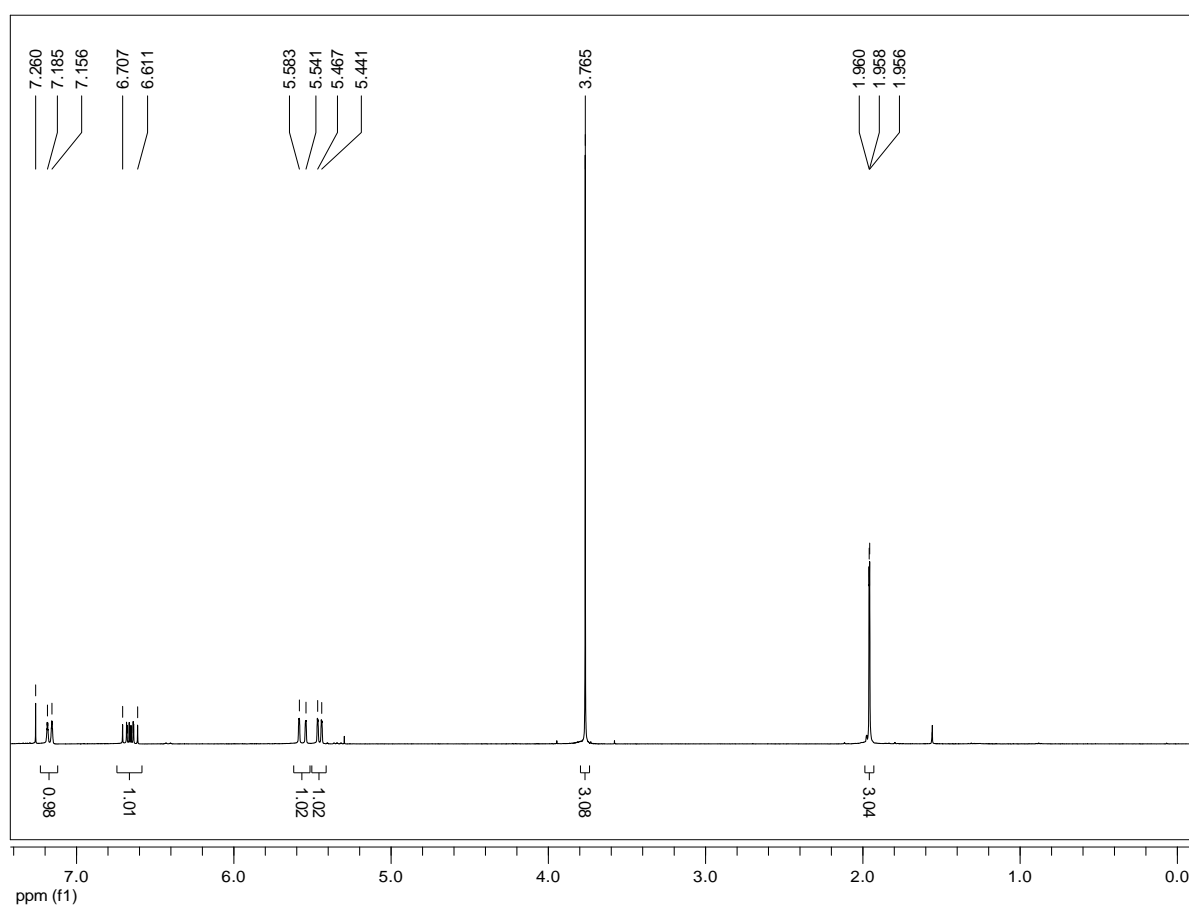



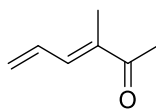**11**

**(E)-3-Methylhexa-3,5-dien-2-one (11):** To a suspension (nearly a solution) of the ester **19** (100 mg, 0.793 mmol, 1.00 eq) and *N,O*-dimethylhydroxylamine hydrochloride (116 mg, 1.19 mmol, 1.50 eq) in THF (8 mL) was added MeMgCl (0.66 mL 3 M in THF, 1.98 mmol, 2.50 eq) over 15 min (syringe pump) at  $-15\text{ }^{\circ}\text{C}$ . The mixture was aged for 10 min at the same temperature, warmed to  $0\text{ }^{\circ}\text{C}$  and more MeMgCl (0.66 mL 3 M in THF, 1.98 mmol, 2.50 eq) was added over 15 min. A reaction control by TLC showed clean conversion to two new spots, both more polar than the starting material. MS-Analysis indicated the presence of the *Weinreb* amide, whereas the ketone could not be identified. The mixture was stirred overnight, allowing the cooling bath to thaw. TLC and MS appeared unchanged. Therefore, the mixture was re-cooled to  $0\text{ }^{\circ}\text{C}$  and more MeMgCl (0.396 mL 3 M in THF, 1.19 mmol, 1.50 eq) was added over 15 min. After 20 min stirring at  $0\text{ }^{\circ}\text{C}$ , the mixture was allowed to warm to rt and stirred for further 2 h. Shortly after the addition, the TLC-spot presumably corresponding to the *Weinreb* amide had weakened, but even after 2 h it had not completely disappeared. Nevertheless, the reaction was quenched into HCl (20 mL 1 M) under rapid stirring. The layers were separated and the aqueous phase was extracted with ether ( $2 \times 10\text{ mL}$ ). The combined organic extracts were washed with water and concentrated under reduced pressure. The crude was purified by column chromatography (pent:Et<sub>2</sub>O 10:1) to afford the desired ketone **11** (45.0 mg, 51%) as a colourless liquid.

**TLC** (Hex:EtOAc 10:1):  $R_f = 0.35$

**<sup>1</sup>H-NMR** (CDCl<sub>3</sub>, 400.1 MHz):  $\delta = 7.01$  (bd,  $J = 11.0\text{ Hz}$ , 1H),  $6.74$  (ddd,  $J = 10.1\text{ Hz}$ ,  $J = 10.9\text{ Hz}$ ,  $J = 16.8\text{ Hz}$ , 1H),  $5.62$  (m<sub>c</sub>, 1H),  $5.51$  (m<sub>c</sub>, 1H),  $2.36$  (s, 3H),  $1.90$  (m<sub>c</sub>, 3H).

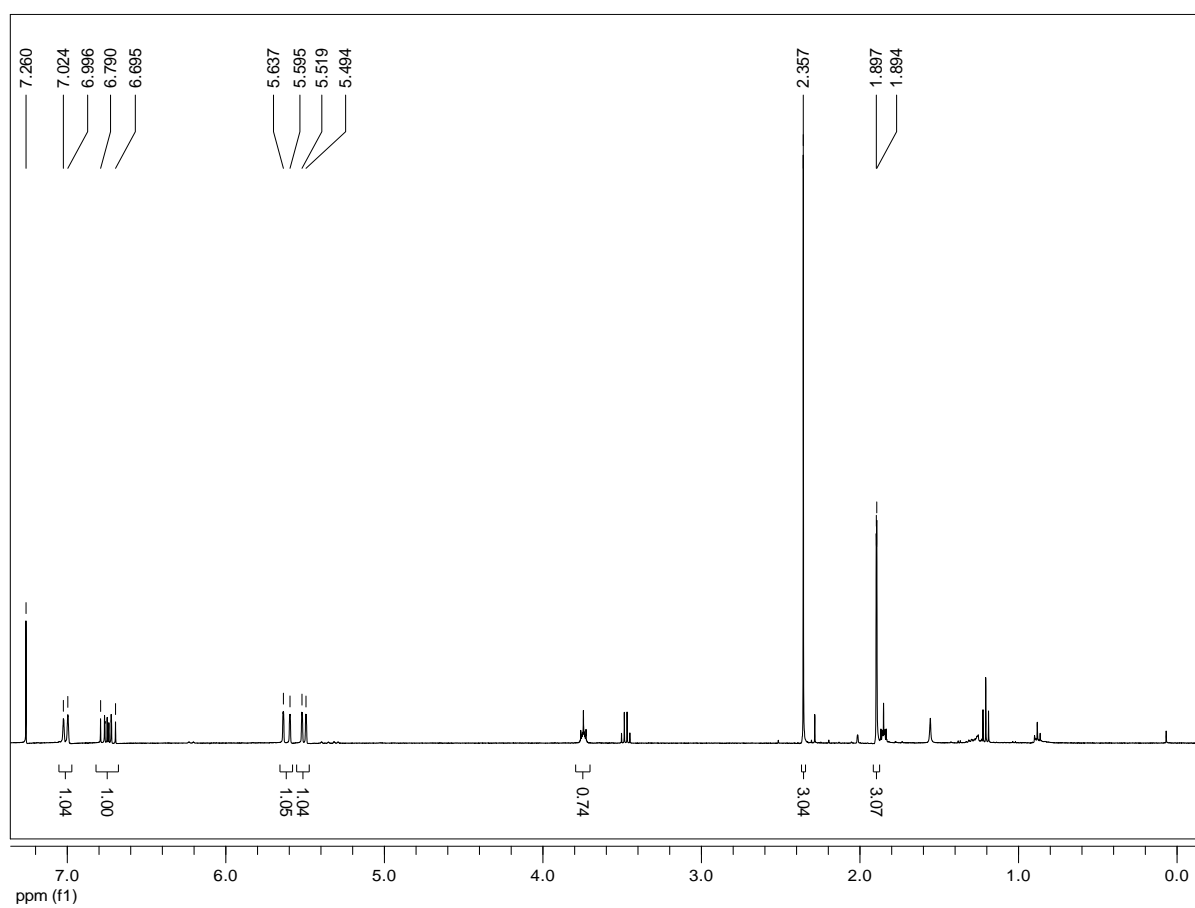

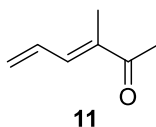

**(E)-3-Methylhexa-3,5-dien-2-one (11):** To a solution of the ester **19** (100 mg, 0.793 mmol, 1.00 eq) was added LiHMDS (1.59 mL 1.0 M in THF/Ethylbenzene, 1.59 mmol, 2.00 mmol) at  $-78\text{ }^{\circ}\text{C}$ . After 15 min, MeMgCl (0.396 mL 3 M in THF, 1.20 mmol, 1.50 eq) was added slowly at the same temperature. The mixture was aged for 2.5 h at  $-78\text{ }^{\circ}\text{C}$ . TLC showed only very little conversion of ester **19** to ketone **11**. Therefore, the cooling bath was allowed to warm to  $+10\text{ }^{\circ}\text{C}$  over a period of 1.5 h. TLC then indicated high conversion. The mixture was recooled to  $0\text{ }^{\circ}\text{C}$  and more MeMgCl (0.132 mL 3 M in THF, 0.396 mmol, 0.50 eq) was added dropwise. After 1 h at  $0\text{ }^{\circ}\text{C}$  (TLC looked about the same as before, but seemingly some side product had formed) the reaction was quenched into ice cold HCl (20 mL 1 M). The layers were separated and the aqueous phase was extracted with ether (3×10 mL). The combined organic extracts were washed with brine, dried over  $\text{MgSO}_4$  and concentrated under reduced pressure. TLC of the crude revealed, that most probably some overaddition had taken place and that other side products were present. The crude was purified by column chromatography (pent:Et<sub>2</sub>O 10:1) to afford the desired ketone **11** (30.6 mg, 35%). The material was identical to the ketone obtained by *Weinreb* ketone synthesis (*vide supra*).

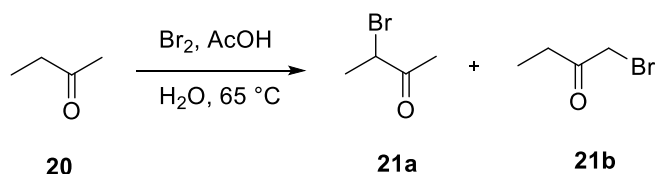

**1-Bromobutan-2-one (21a):** To a solution of 2-butanone (**20**) (18.6 mL, 208 mmol, 1.00 eq) and glacial acetic acid (11.9 mL, 208 mmol, 1.00 eq) in water (50 mL) was added bromine (10.7 mL, 208 mmol, 1.00 eq) dropwise at  $65\text{ }^{\circ}\text{C}$  (oil bath at  $75\text{ }^{\circ}\text{C}$ ) over 1 h 50 min. The first few drops of  $\text{Br}_2$  coloured the mixture deep orange and the colour persisted for several minutes before it suddenly faded. The colour of the following drops then discharged quickly. During the addition the solution turned into a biphasic mixture, the pale orange organic phase being at the bottom. After the addition, the mixture was stirred for further 30 min at  $65\text{ }^{\circ}\text{C}$  and was then allowed to cool to rt. Cold water was

added and the mixture was neutralized with  $\text{Na}_2\text{CO}_3$  (ca. 25 g). The layers were separated and the organic phase was dried over  $\text{MgSO}_4$ . The crude was purified by distillation (bath temp.: 100-135 °C, p=100 mbar) to afford the desired product **21a** in a ca. 11:1 mixture with its regioisomer 21b (as an almost colourless liquid (12.8 g, 41%, bp 68-69 °C).

**$^1\text{H-NMR}$**  ( $\text{CDCl}_3$ , 400.1 MHz):  $\delta$  = 4.39 (q,  $J$  = 6.8 Hz, 1H), 2.37 (s, 3H), 1.74 (d,  $J$  = 6.8 Hz, 3H).

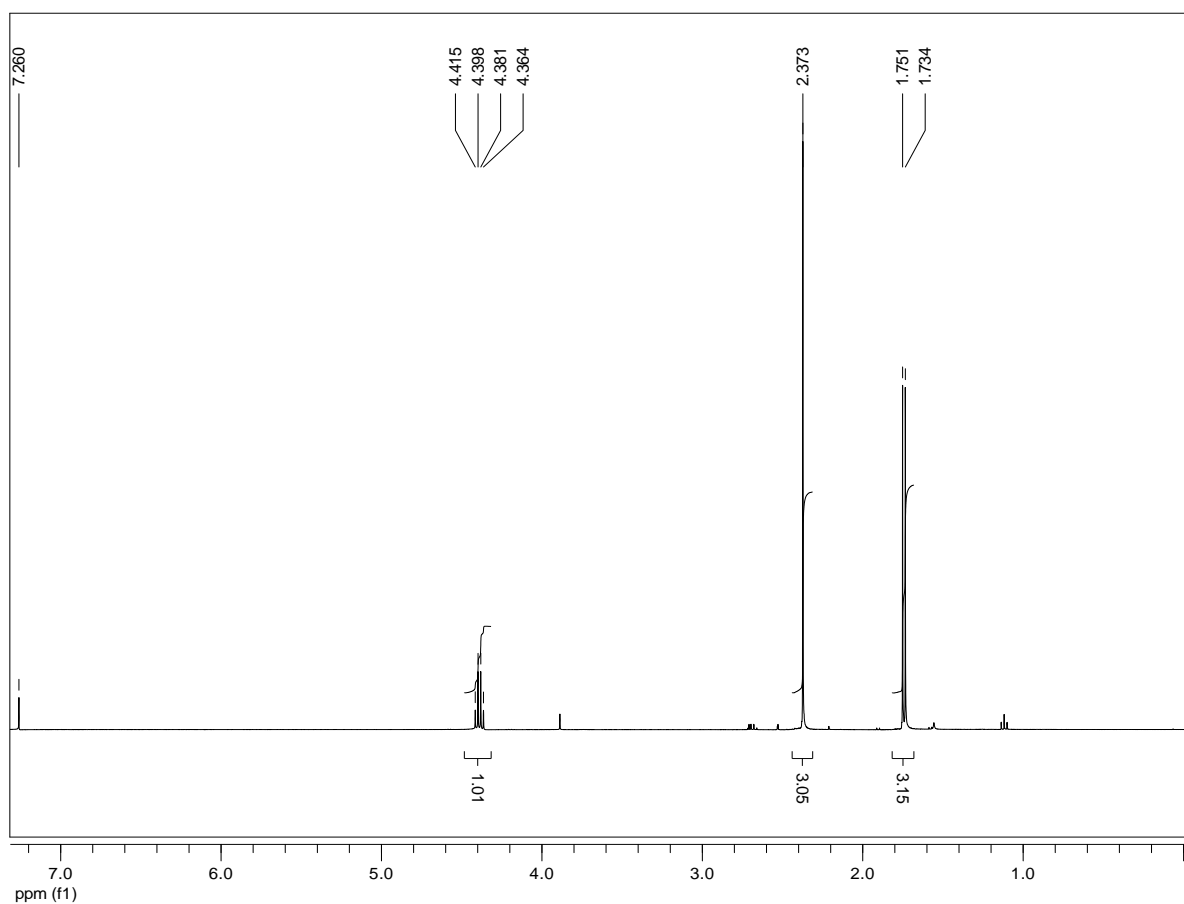

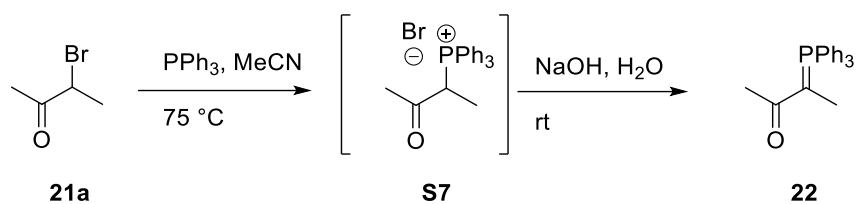

**3-(Triphenyl-15-phosphaneylidene)butan-2-one (22):** To a solution of  $\text{PPh}_3$  (6.51 g, 24.8 mmol, 1.25 eq) in MeCN (40 mL) was added the  $\alpha$ -bromoketone **21a** (3.00 g, 19.9 mmol, 1.00 eq) at rt and the mixture was heated to  $70^\circ\text{C}$  for 19 h. The nearly colourless solution was allowed to cool to rt. Then phenolphthalein (5 mg) was added and NaOH (4 M) was added until a pink colour persisted.  $\text{CH}_2\text{Cl}_2$  (50 mL) was added and the layers were separated (organic layer was on top of the aqueous layer). The pink aqueous phase was extracted with  $\text{CH}_2\text{Cl}_2$  (2×30 mL). The combined organic layers were washed with brine, dried over  $\text{MgSO}_4$  and concentrated under reduced pressure, yielding a pale yellow solid (7.74 g, ca. 70% wt/wt ylid along with  $\text{PPh}_3$ , 5.45 g, 82%, 4 peaks in  $^{31}\text{P}$ -NMR!). The crude was transferred to a glass filter, triturated with hexane and dried *in vacuo* to afford **22** as a pale yellow solid (6.64 g, ca. 79% wt/wt along with  $\text{PPh}_3$  and an unknown impurity, 5.22 g, 79%).

**$^{31}\text{P}$ -NMR** ( $\text{CDCl}_3$ , 400.1 MHz):  $\delta$  = 29.0 (?), 17.6 (main peak), 14.8 (?), -5.4 ( $\text{PPh}_3$ ).  **$^1\text{H}$ -NMR** ( $\text{CDCl}_3$ , 400.1 MHz):  $\delta$  = 7.72-7.37 (m, 15H), 2.13 (s, 3H), 1.66 (d,  $^3J_{\text{HP}}$  = 15.5 Hz, 3H).

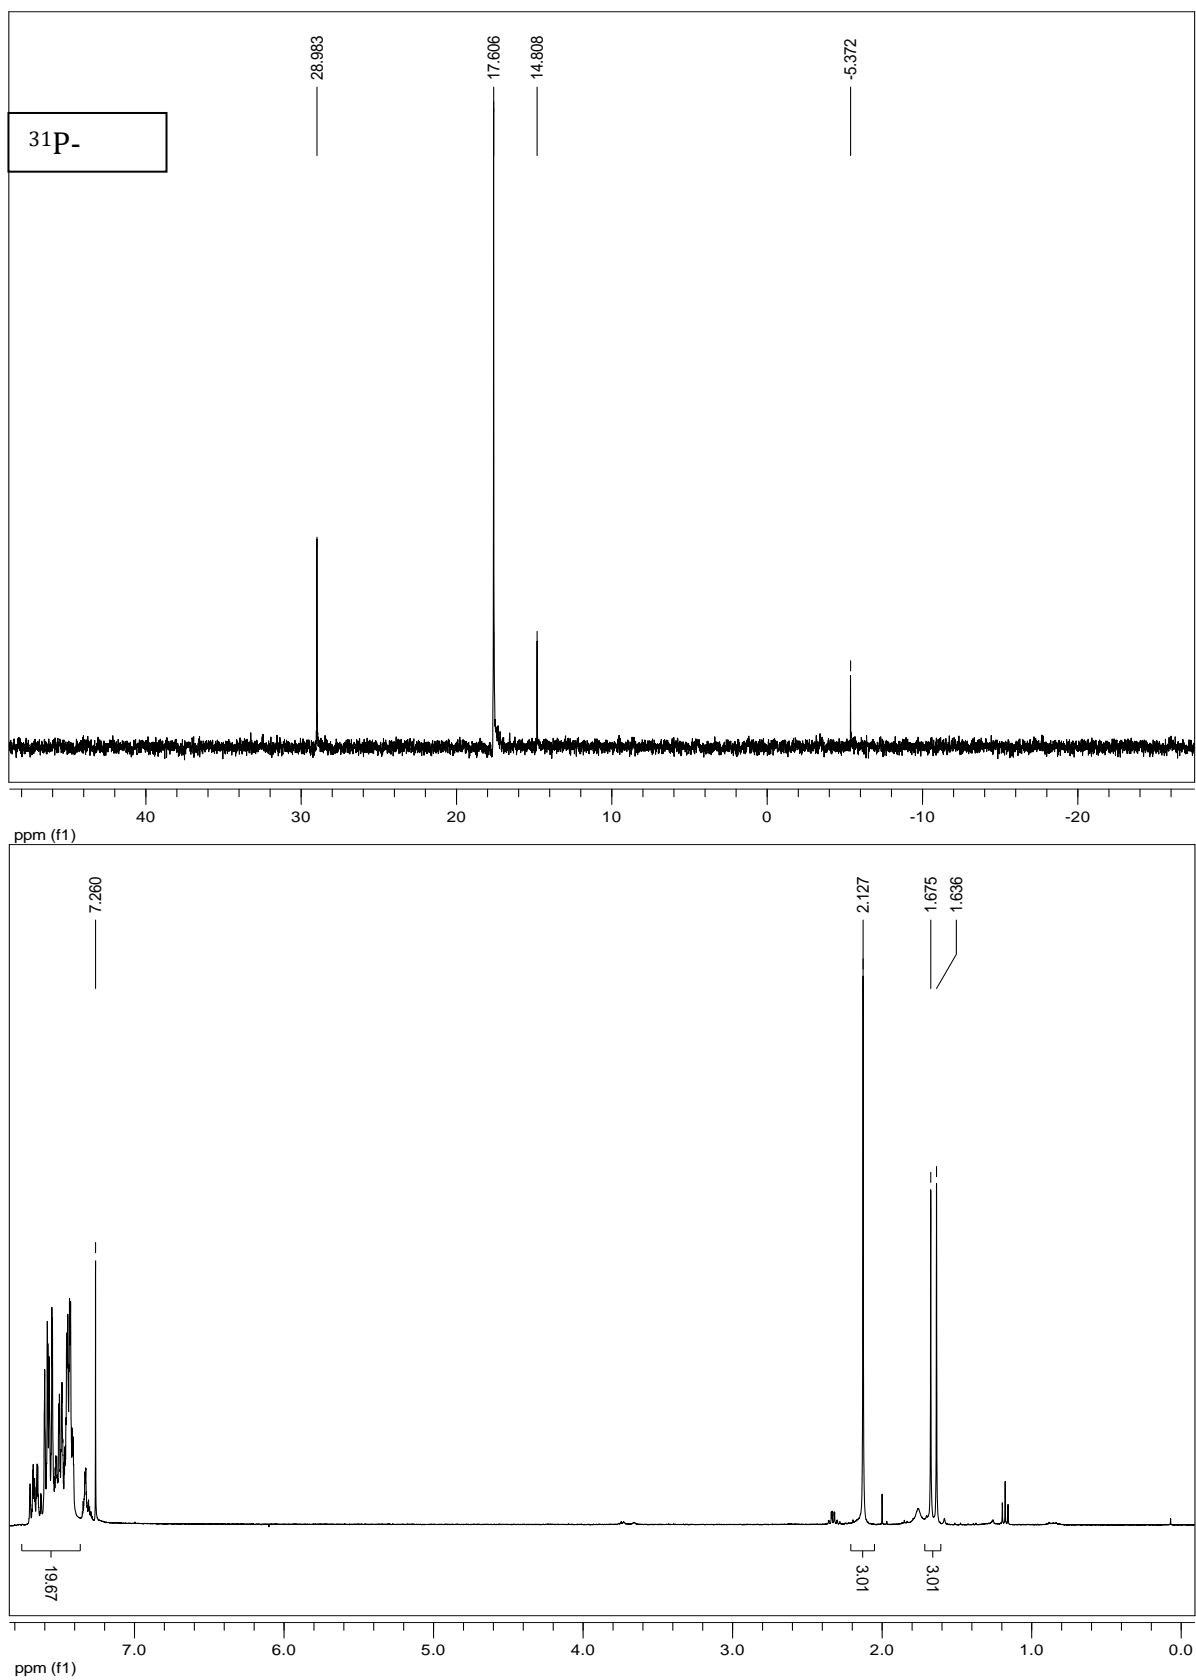

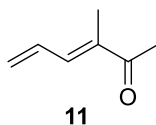

**(E)-3-Methylhexa-3,5-dien-2-one (11):** To a solution of the phosphonium ylide **22** (5.22 g, 15.7 mmol, 1.00 eq) in  $\text{CH}_2\text{Cl}_2$  (20 mL) was added acrolein (**18**) (1.10 mL, 16.5 mmol, 1.05 eq) dropwise at rt. The temperature increased only 2-3 °C. After the addition, the yellow solution was stirred at rt for 5 min before it was heated to reflux (bath temp. 47 °C). After 3 h 45 min, the main spot on TLC was the desired product. However, the ylid was still present in the mixture referring to ESI-MS. Therefore, the mixture was refluxed overnight. ESI-MS and TLC appeared unchanged. Nevertheless, the mixture was allowed to cool to rt, transferred to a round bottom flask and ca. 15 mL of the solvent were removed on a rotary evaporator (800 mbar). The remaining yellow liquid was cooled to 0 °C, pentane (75 mL) was added and the suspension was stored in a fridge overnight. The precipitate was filtered off and washed with pentane. The combined filtrates were concentrated at the rotary evaporator. The crude was then purified by kugelrohr distillation to afford the dienone **11** (993 mg, 57%) as a pale green liquid. For analytical data, see above.

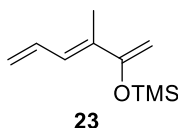

**(E)-Trimethyl((3-methylhexa-1,3,5-trien-2-yl)oxy)silane (23):** To a solution of the methyl ketone **11** (100 mg, 0.908 mmol, 1.00 eq),  $\text{NEt}_3$  (0.189 mL, 1.36 mmol, 1.50 eq) and TMS-Cl (0.173 mL, 1.36 mmol, 1.50 eq) in MeCN (0.4 mL) was added a solution of NaI (204 mg, 1.36 mmol, 1.50 eq) in MeCN (1.5 mL) at 0 °C. The cooling was removed, the pale yellow suspension was allowed to warm to rt and then stirred at 90 °C overnight. The colour had changed to orange. After 18 h stirring at the same temperature, the mixture was re-cooled to 0 °C. Then cold pentane and ice water were added successively. The layers were separated and the aqueous phase was extracted with pentane (2×2 mL). The combined organic extracts were washed with  $\text{NH}_4\text{Cl}$  (sat. aq., 2×2 mL), dried over  $\text{MgSO}_4$  and concentrated under reduced pressure. The crude silyl enoether **23** (145 mg, 98% wt/wt along with s.m. and pentane, 142 mg, 86%) was used without purification.\

**$^1\text{H}$ -NMR** ( $\text{CDCl}_3$ , 400.1 MHz):  $\delta$  = 6.67 (ddd,  $J$  = 10.0 Hz,  $J$  = 11.3 Hz,  $J$  = 16.5 Hz, 1H), 6.54 (bd,  $J$  = 11.3 Hz, 1H), 5.32 (dd,  $J$  = 1.9 Hz,  $J$  = 16.5 Hz, 1H), 5.19 (dd,  $J$  = 1.7 Hz,  $J$  = 9.9 Hz, 1H), 4.56 (d,  $J$  = 1.1 Hz, 1H), 4.37 (bs, 1H), 1.88 (bs, 3H), 0.23 (bs, 9H).

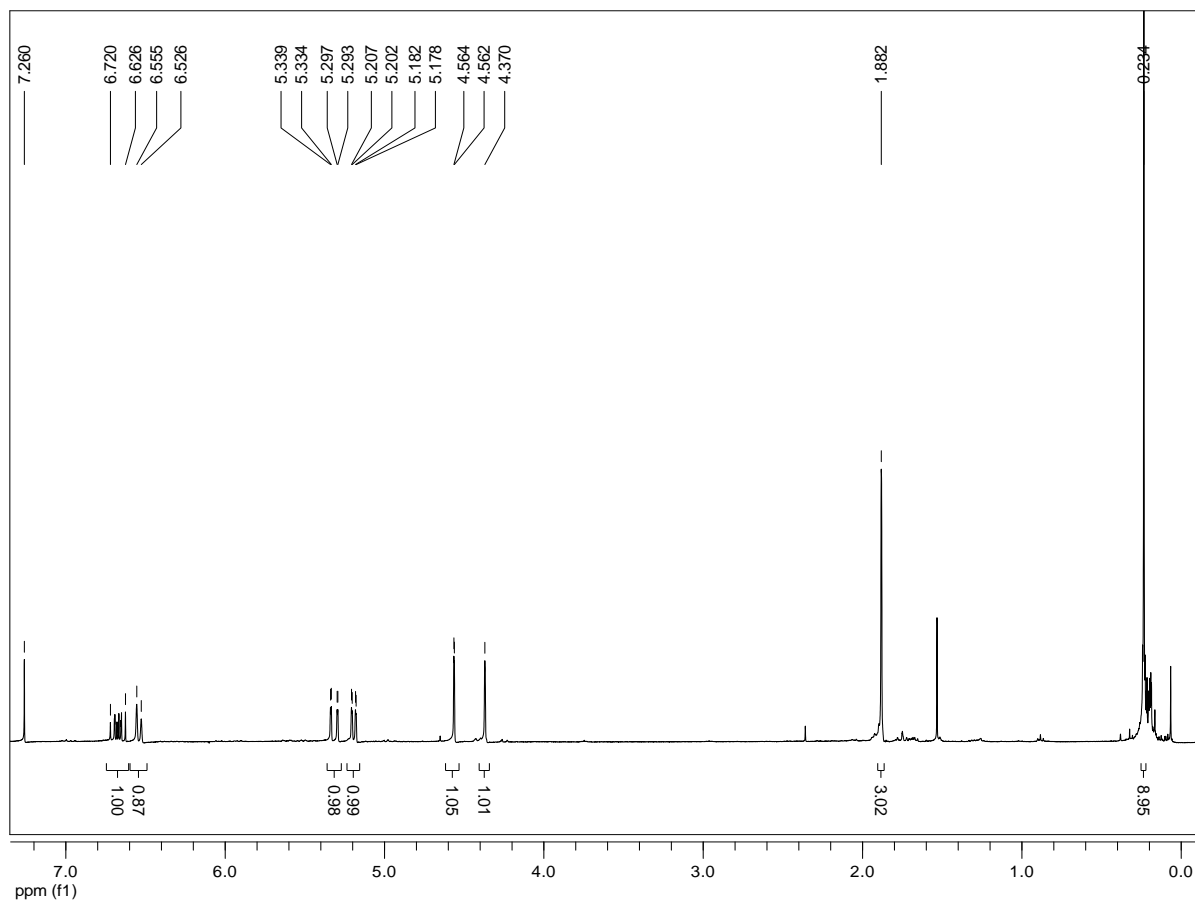



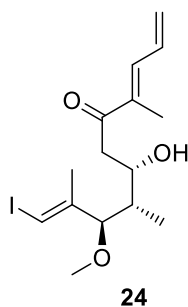

**(3E,7S,8S,9R,10E)-7-Hydroxy-11-iodo-9-methoxy-4,8,10-trimethylundeca-1,3,10-trien-5-one (24):** A solution of the aldehyde **11** (41.4 mg, 0.154 mmol, 1.00 eq) in CH<sub>2</sub>Cl<sub>2</sub> (1.5 mL) was dried over molecular sieves (3-4 pellets, 3 Å) for a few minutes. Then TiCl<sub>4</sub> (0.154 mL 1 M in CH<sub>2</sub>Cl<sub>2</sub>, 0.154 mmol, 1.00 eq) was added dropwise at -78 °C. The deep yellow solution was aged for 3 min before a solution of the TMS enolether **23** (56.3 mg, 0.309 mmol, 2.00 eq) in CH<sub>2</sub>Cl<sub>2</sub> (0.5 mL, dried over molecular sieves, flask rinsed with 0.2 mL) was added dropwise at -78 °C. The colour immediately turned dark red to brown. The solution was stirred for 20 min at the same temperature. Then H<sub>2</sub>O (0.3 mL), 1 M NaOH (0.3 mL) and H<sub>2</sub>O (0.9 mL) were added subsequently, and the layers were separated. The aqueous phase was extracted with CH<sub>2</sub>Cl<sub>2</sub> (3×2 mL). The combined organic extracts were washed with brine, dried over MgSO<sub>4</sub> and concentrated under reduced pressure. The crude was purified by column chromatography (hex:EtOAc 10:1), which afforded the desired product **24** (7.2 mg, dr=4:1, 12%) as a nearly colourless oil along with some parent aldehyde (9.2 mg, dr=10:1, 22%).

**TLC** (hex:EtOAc 5:1): R<sub>f</sub> = 0.24

**<sup>1</sup>H-NMR** (CDCl<sub>3</sub>, 400.1 MHz): δ = 7.03 (bd, *J* = 10.9 Hz, 1H), 6.74 (m<sub>c</sub>, 1H), 6.25 (bs, 1H), 5.65 (d, *J* = 16.8 Hz, 1H), 5.54 (d, *J* = 10.1 Hz, 1H), 4.08 (ddd, *J* = 2.4 Hz, *J* = 5.7 Hz, *J* = 8.5 Hz, 1H), 3.79 (d, *J* = 6.8 Hz, 1H), 3.24 (s, 3H), 3.19 (d, *J* = 2.4 Hz, 1H), 2.91 (dd, *J* = 8.9 Hz, *J* = 17.1 Hz, 1H), 2.77 (dd, *J* = 3.5 Hz, *J* = 17.1 Hz, 1H), 1.90 (d, *J* = 0.7 Hz, 3H), 1.74 (d, *J* = 1.0 Hz, 3H), 1.70 (m<sub>c</sub>, 1H), 0.98 (d, *J* = 6.9 Hz, 3H).

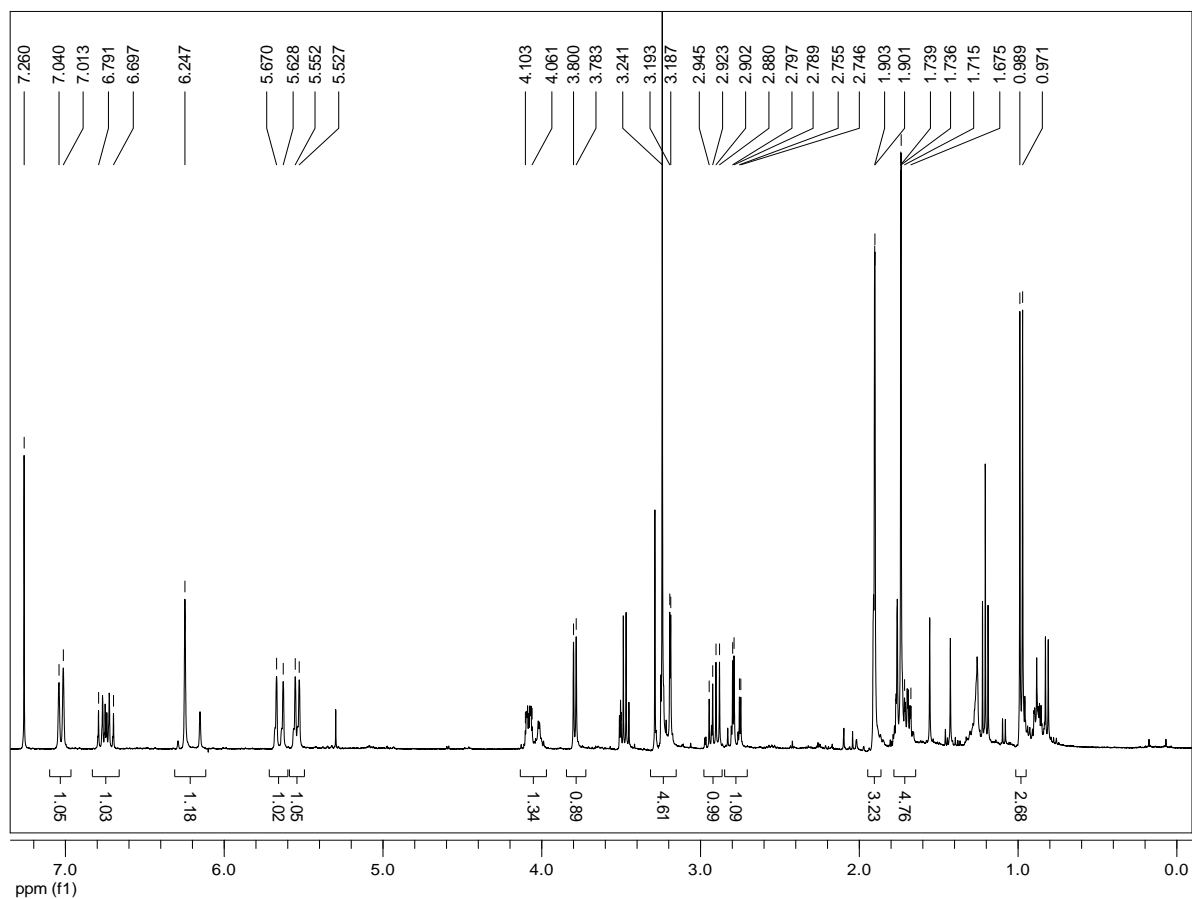

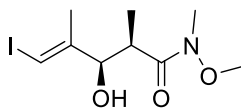**S8**

**(2*R*,3*R*,*E*)-3-Hydroxy-5-iodo-*N*-methoxy-*N*,2,4-trimethylpent-4-enamide (**S8**):** To a suspension of *N,O*-dimethylhydroxylamine hydrochloride (136 mg, 1.40 mmol, 3.00 eq) in THF (2.3 mL) was added AlMe<sub>3</sub> (0.687 mL 2 M in heptanes, 1.37 mmol, 2.95 eq) at 0 °C. After 10-15 min the gas evolution had almost ceased and the cooling was removed. The colourless solution was aged for 1 h and then cooled to -40 °C (MeCN/dry ice). Afterwards a solution of the oxazolidinone **15** (200 mg, 0.466 mmol, 1.00 eq) in THF (1 mL, rinsed with 2×0.2 mL) was added and the cooling was removed. After 2 h 25 min the reaction was quenched with *Rochelle's* salt (ca. 3 *Pasteur* pipettes) at -10 °C (ice/NaCl). The suspension was allowed to warm to rt and then stirred for another 2.5 h. CH<sub>2</sub>Cl<sub>2</sub> (10 mL) was added and the layers were separated. The aqueous phase was extracted with CH<sub>2</sub>Cl<sub>2</sub> (2×10 mL). The combined organic extracts were washed with brine, dried over MgSO<sub>4</sub> and concentrated at under reduced pressure. The crude was then purified by column chromatography (hex:EtOAc 1:1) to afford the desired *Weinreb* amide **S8** (140 mg, 96%) as a colourless crystalline solid, along with recovered *Evans* oxazolidinone **S4** (80.5 mg, 98%) as a colourless solid.

**TLC** (hex:EtOAc 1:1): R<sub>f</sub> = 0.36

**<sup>1</sup>H-NMR** (CDCl<sub>3</sub>, 400.1 MHz): δ = 6.43 (mc, 1H), 4.42 (bs, 1H), 4.24 (bs, 1H), 3.73 (s, 3H), 3.21 (s, 3H), 3.10 (d, *J*=6.5 Hz, 1H), 1.79 (s, 3H), 1.08 (d, *J*=7.1 Hz, 3H).

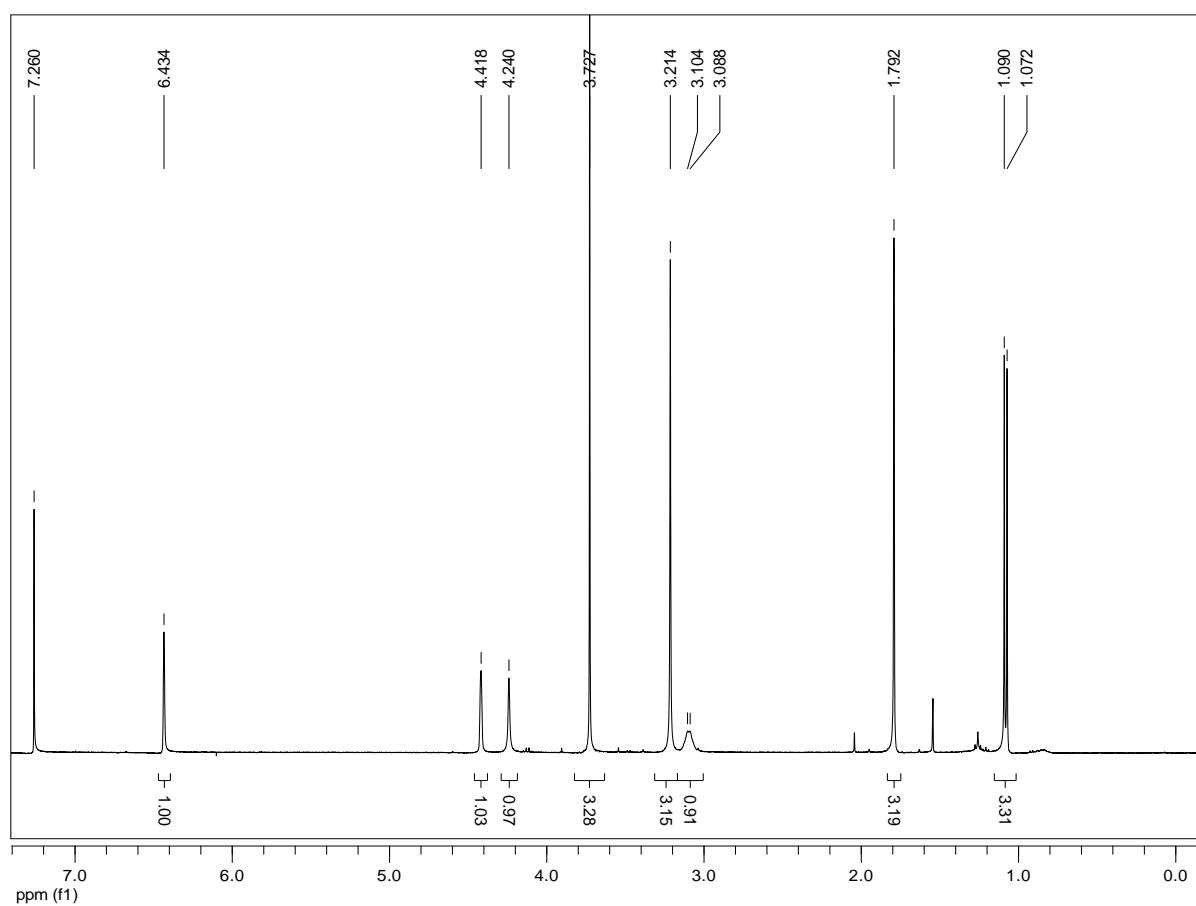

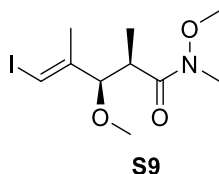

**(2*R*,3*R*,*E*)-5-Iodo-N,3-dimethoxy-N,2,4-trimethylpent-4-enamide (S9):** To a cooled (0 °C) solution of the alcohol **S8** (1.43 g, 4.55 mmol, 1.00 eq) and MeI (2.84 mL, 45.6 mmol, 10.0 eq) in THF:DMF (3:1, 44 mL) was added NaH (273 mg 60% dispersion in mineral oil, 6.84 mmol, 1.50 eq). A white precipitate formed with a short delay. The white suspension was stirred for 2 h at 0 °C. Then the reaction was quenched with pH 7 phosphate buffer. Water (100 mL) and CH<sub>2</sub>Cl<sub>2</sub> (30 mL) were added and the layers were separated. The aqueous phase was extracted with CH<sub>2</sub>Cl<sub>2</sub> (3×30 mL). The combined organic extracts were washed with water (50 mL) and brine, dried over MgSO<sub>4</sub> and concentrated under reduced pressure. The crude was purified by column chromatography (hex:EtOAc 2:1) to afford the desired methyl ether **S9** (1.42 g, 95%) as a nearly colourless liquid.

**TLC** (hex:EtOAc 1:1):  $R_f$  = 0.57

**<sup>1</sup>H-NMR** (CDCl<sub>3</sub>, 400.1 MHz):  $\delta$  = 6.22 (bs, 1H), 3.80 (d,  $J$ =9.6 Hz, 1H), 3.65 (s, 3H), 3.27-3.06 (m, 1H), 3.22 (s, 3H), 3.13 (s, 3H), 1.76 (s, 3H), 1.08 (d,  $J$ =6.8 Hz, 3H).

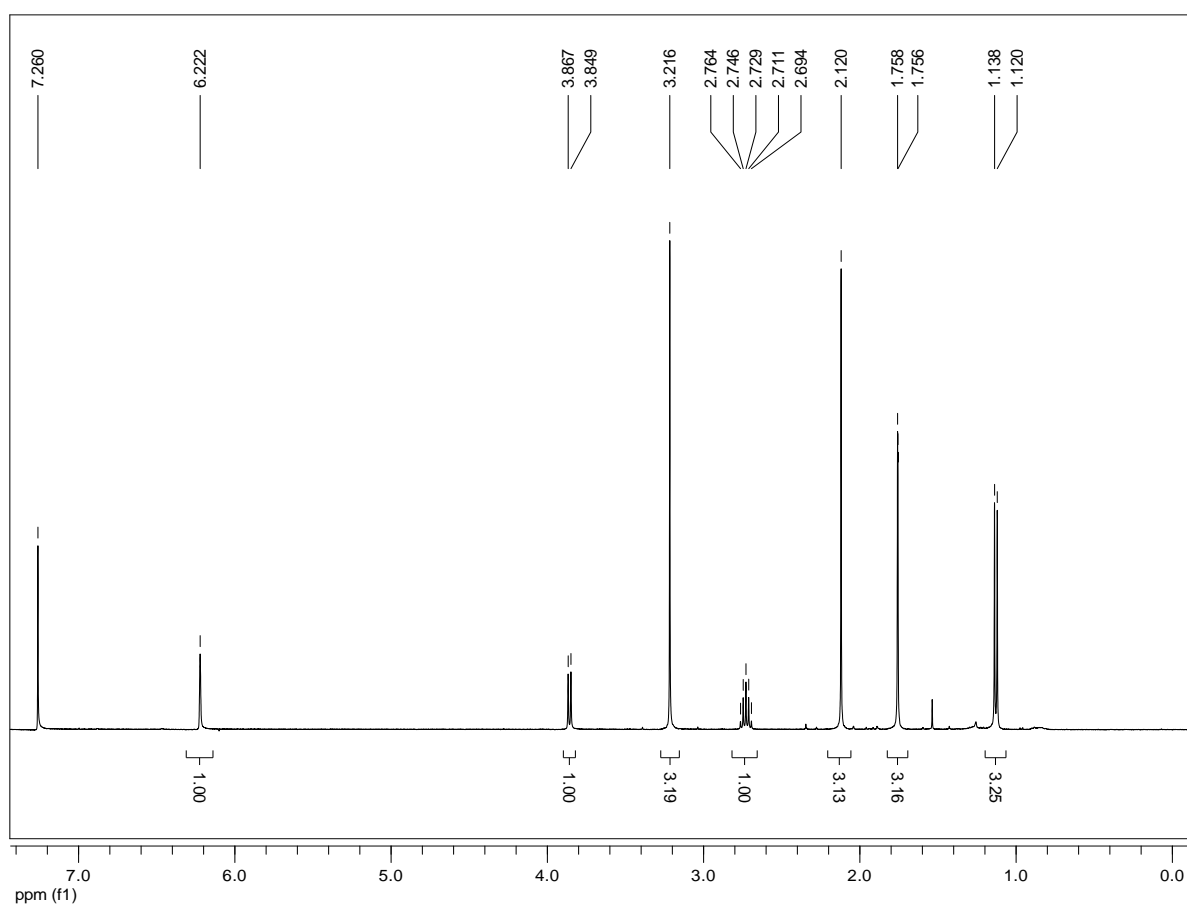

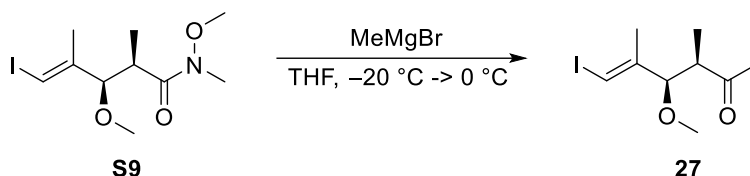

**(3R,4R,E)-6-Iodo-4-methoxy-3,5-dimethylhex-5-en-2-one (27):** To a cooled solution (ca.  $-20\text{ }^{\circ}\text{C}$ , ice/NaCl) of the *Weinreb* amide **S9** (1.42 g, 4.34 mmol, 1.00 eq) in THF (55 mL) was added MeMgBr (5.79 mL 2.7 M in Et<sub>2</sub>O, 15.6 mmol, 3.60 eq) over <5 min. The reaction mixture was stirred for 2.5 h, allowing for the cooling bath to thaw (it was still at ca.  $-5\text{ }^{\circ}\text{C}$ ). Afterwards the reaction was quenched with NH<sub>4</sub>Cl (sat. aq.). Water (100 mL) was added, the mixture was shaken and the layers were separated. The aqueous phase was extracted with ether (3×30 mL). The combined organic extracts were washed with brine, dried over MgSO<sub>4</sub> and concentrated at the rotavap. The crude was purified by column chromatography (hex:EtOAc 10:1) to afford the desired ketone **27** (1.135 g, 93%) as a pale yellow liquid.

**TLC** (Hex:EtOAc 5:1):  $R_f$  = 0.42

**<sup>1</sup>H-NMR** (CDCl<sub>3</sub>, 400.1 MHz):  $\delta$  = 6.22 (mc, 1H), 3.86 (d,  $J$ =7.1 Hz, 1H), 3.22 (s, 3H), 2.73 (p,  $J$ =7.0 Hz, 1H), 2.12 (s, 3H), 1.76 (d,  $J$ =0.9 Hz, 3H), 1.13 (d,  $J$ =7.0 Hz, 3H).

**<sup>13</sup>C-NMR** (CDCl<sub>3</sub>, 100.6 MHz):  $\delta$  = 209.9, 145.3, 86.4, 80.2, 57.0, 50.1, 29.3, 20.0, 12.2.

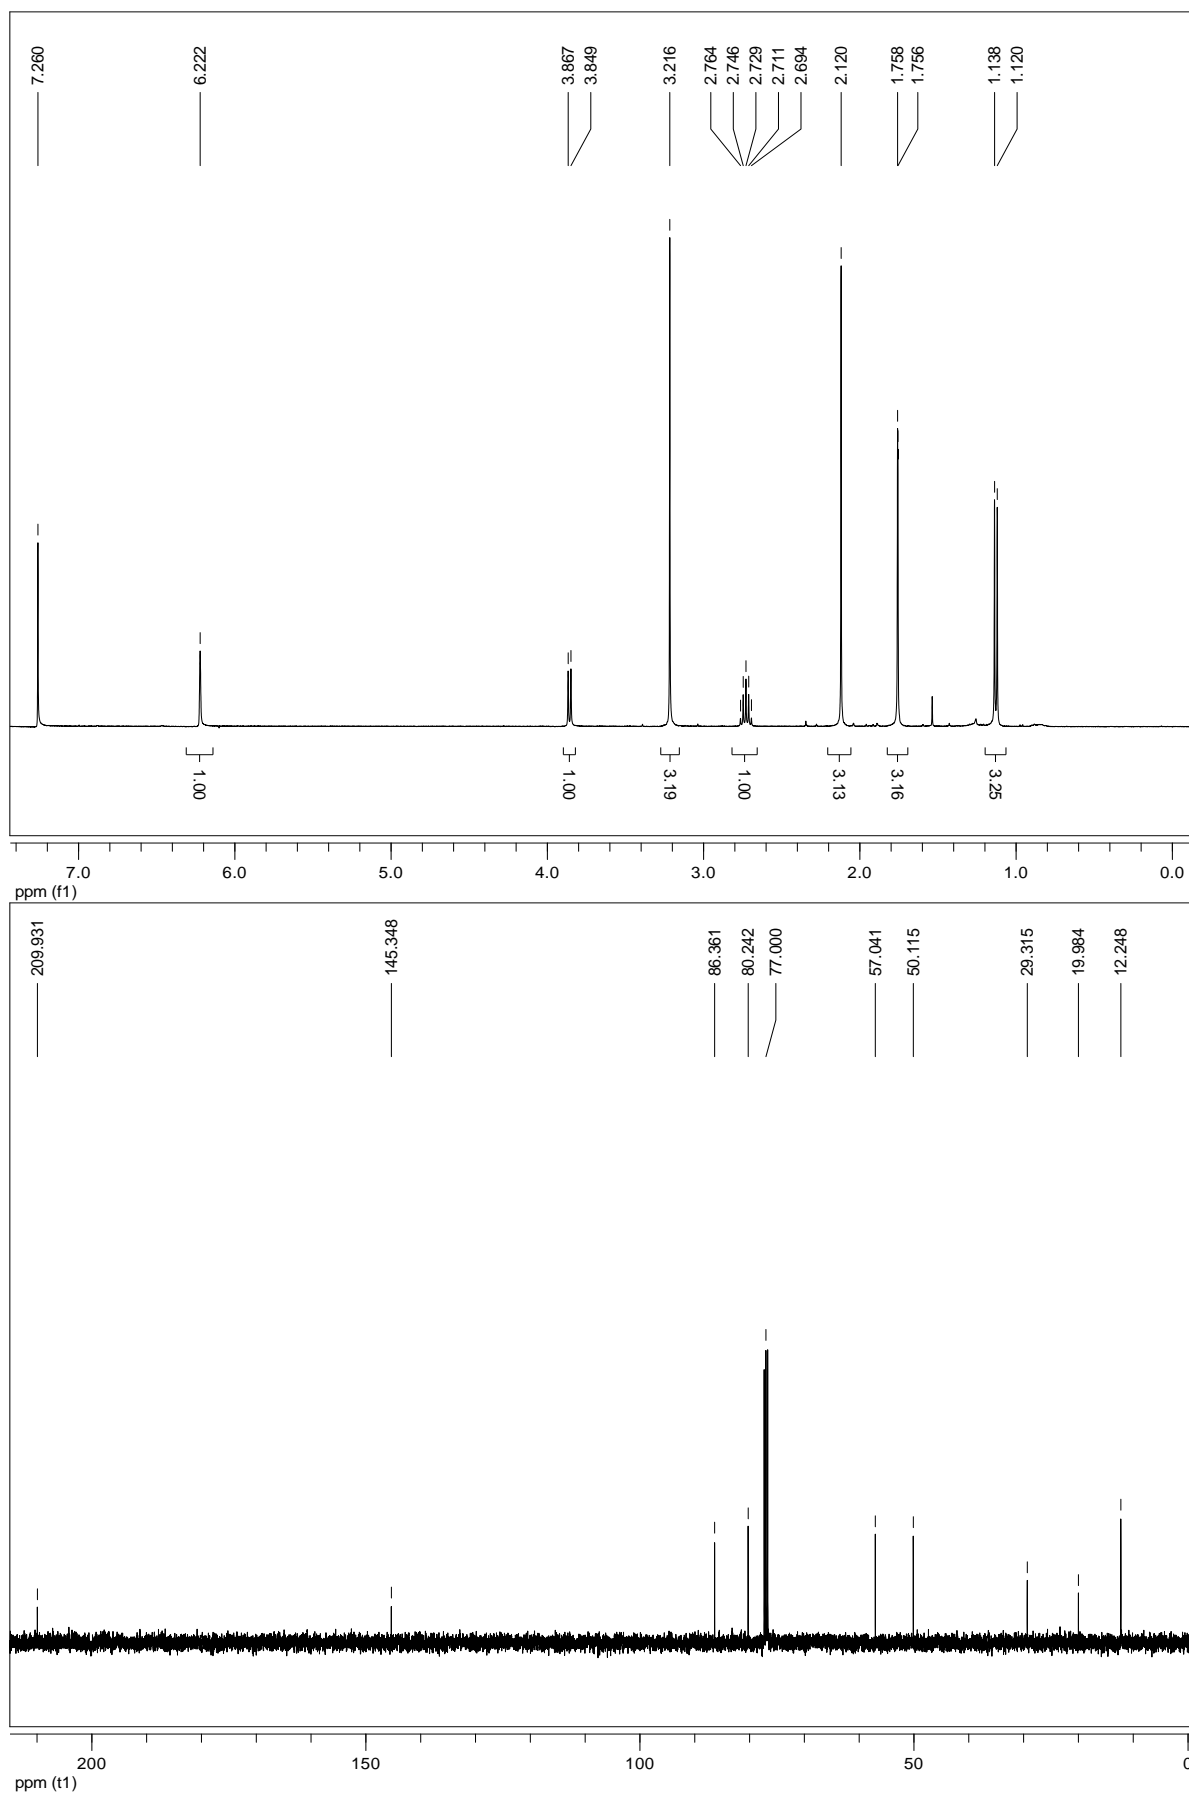



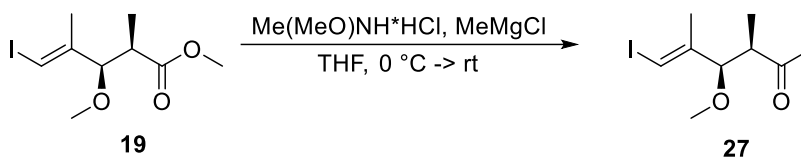

**(3*R*,4*R*,*E*)-6-Iodo-4-methoxy-3,5-dimethylhex-5-en-2-one (27):** To a suspension (almost a solution) of the ester **19** (100 mg, 0.335 mmol, 1.00 eq) and the hydroxylamine salt (40.8 mg, 0.418 mmol, 1.25 eq) in THF (4 mL) was added MeMgCl (0.738 mL 3 M in THF, 2.21 mmol, 6.60 eq) dropwise at  $-10\text{ }^{\circ}\text{C}$  (ice/NaCl). The mixture was stirred for 2 h, allowing the cooling bath to thaw. Then the cooling was removed and the reaction was stirred at rt for another 3 h 25 min. The colour turned yellow. Afterwards the solution was poured into  $\text{NH}_4\text{Cl}$  (sat. aq.). The layers were separated and the aqueous phase was extracted with ether (3×10 mL). The combined organic layers were washed with brine, dried over  $\text{MgSO}_4$  and concentrated under reduced pressure. The crude was purified by column chromatography (hex:EtOAc 10:1) to afford the desired ketone **27** (68.4 mg, 72%) as a colourless oil.

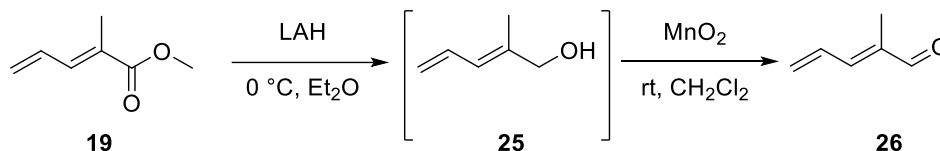

**(*E*)-2-Methylpenta-2,4-dienal (26):**

Reduction: To a cooled ( $0\text{ }^{\circ}\text{C}$ ) solution of the ester **19** (1.00 g, 7.93 mmol, 1.00 eq) in  $\text{Et}_2\text{O}$  (40 mL) was added  $\text{LiAlH}_4$  (602 mg, 15.9 mmol, 2.00 eq) in one portion. The mixture was stirred at  $0\text{ }^{\circ}\text{C}$  for 30 min. Afterwards the reaction was quenched with water (8 mL), followed by 1 M NaOH (8 mL) and more water (24 mL). The layers were separated and the aqueous phase was extracted with  $\text{Et}_2\text{O}$  (3×15 mL). The combined organic extracts were washed with brine, dried over  $\text{MgSO}_4$  and concentrated under reduced pressure. As the substance turned out to be very volatile, not all of the solvent was removed and the crude allylic alcohol **25** was directly used in the next step.

**Oxidation:** To a solution of the allylic alcohol **25** (estimated 778 mg, 7.93 mmol, 1.00 eq) in CH<sub>2</sub>Cl<sub>2</sub> (25 mL) were added molecular sieves (3 Å, beads) and activated MnO<sub>2</sub> (13.8 g, 159 mmol, 20.0 eq) at rt. A slight warming was observed. The suspension was stirred for 3 h at the same temperature. Afterwards it was filtered through a pad of celite, topped with a few mm of silica. The filter was washed thoroughly with CH<sub>2</sub>Cl<sub>2</sub> and Et<sub>2</sub>O. The combined filtrates were concentrated under reduced pressure and the crude aldehyde **26** (840 mg, 71% wt/wt along with Et<sub>2</sub>O and CH<sub>2</sub>Cl<sub>2</sub>, 597 mg, 78% over two steps) was used directly for the next step.

**<sup>1</sup>H-NMR** (CDCl<sub>3</sub>, 400.1 MHz): δ = 9.48 (s, 1H), 6.90-6.77 (m, 2H), 5.77-5.66 (m, 1H), 5.65-5.56 (m, 1H), 1.87 (s, 3H).

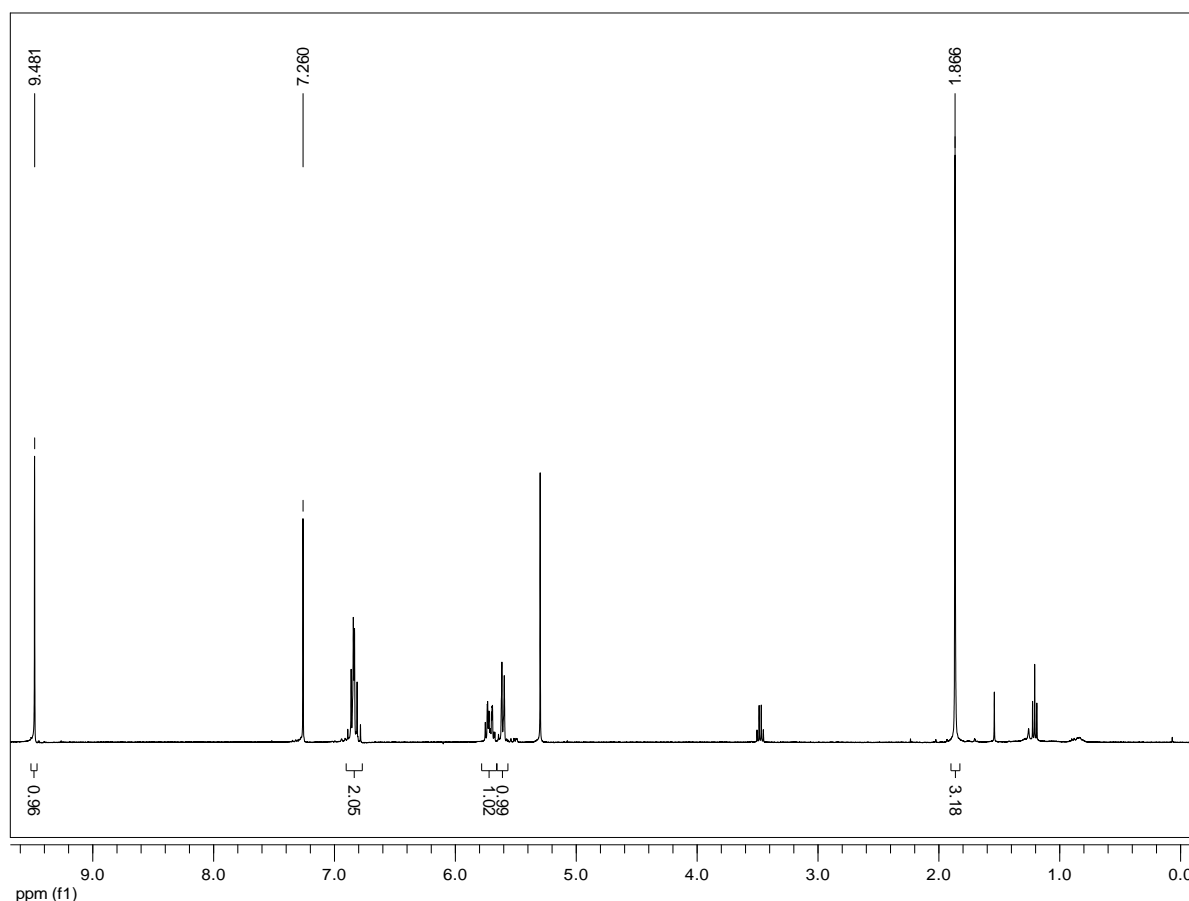

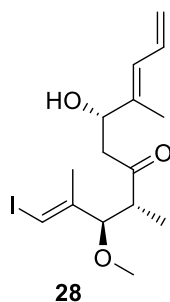

**(1*E*,3*R*,4*R*,7*S*,8*E*)-7-Hydroxy-1-iodo-3-methoxy-2,4,8-trimethylundeca-1,8,10-trien-5-one (28):** To a cooled ( $-78\text{ }^{\circ}\text{C}$ ) solution of (+)-DIP-Cl (1.19 g, 3.71 mmol, 2.00 eq) in  $\text{CH}_2\text{Cl}_2$  (5 mL) was added  $\text{NEt}_3$  (0.618 mL, 4.45 mmol, 2.40 eq) followed by a solution of the ketone **27** (523 mg, 1.85 mmol, 1.00 eq) in  $\text{CH}_2\text{Cl}_2$  (2 mL, rinsed with  $2 \times 2\text{ mL}$ ). Ca. 15 min after the addition of **27**, a white precipitate formed. The thick suspension was stirred for 3 h 15 min at  $-78\text{ }^{\circ}\text{C}$ . Afterwards a solution of the aldehyde **26** (356 mg, 3.71 mmol, 2.00 eq) in  $\text{CH}_2\text{Cl}_2$  (5.6 mL), which had been dried over molecular sieves for 10 min, was added slowly, whereupon the colour turned increasingly orange. The mixture was stirred for another 2 h at  $-78\text{ }^{\circ}\text{C}$  (the colour faded towards a pale yellow) and was then allowed to stand in the freezer ( $-18\text{ }^{\circ}\text{C}$ ) for 3 d. During this time the salts were dissolved and an orange, slightly turbid solution resulted. The reaction was quenched with pH 7 phosphate buffer and the layers were separated. The aqueous phase was diluted with water and extracted with  $\text{CH}_2\text{Cl}_2$  ( $3 \times 30\text{ mL}$ ). The combined extracts were concentrated under reduced pressure and the residue was dissolved in MeOH (10 mL). Then pH 7 phosphate buffer (2 mL) was added. The mixture was cooled to  $0\text{ }^{\circ}\text{C}$  and  $\text{H}_2\text{O}_2$  (30%, 2.5 mL) was added. The cooling was removed after a few minutes and the mixture was stirred for 1 h at rt. Afterwards it was poured into water (200 mL).  $\text{CH}_2\text{Cl}_2$  (30 mL) was added and the layers were separated. The aqueous phase was then extracted with  $\text{CH}_2\text{Cl}_2$  ( $3 \times 30\text{ mL}$ ). The combined organic extracts were washed with  $\text{NaHCO}_3$  (sat. aq.) and brine, dried over  $\text{MgSO}_4$  and concentrated under reduced pressure. The crude (dr ca. 12:1) was purified by column chromatography (hex:EtOAc 10:1 $\rightarrow$ 5:1) to afford the desired  $\beta$ -hydroxy ketone **28** (1.10 g, 37% wt/wt along with isopinocampheol, 407 mg, 58%, dr=14.8:1) as a nearly colourless oil.

**TLC** (hex:EtOAc 5:1):  $R_f = 0.16$

**$^1\text{H-NMR}$**  ( $\text{CDCl}_3$ , 400.1 MHz):  $\delta = 6.57$  (ddd,  $J = 10.2\text{ Hz}$ ,  $J = 10.8\text{ Hz}$ ,  $J = 16.8\text{ Hz}$ , 1H,  $\text{CH}_2=\text{CH}$ ), 6.25-6.21 (m, 1H,  $\text{CHI}$ ), 6.13 (d,  $J = 10.9\text{ Hz}$ , 1H,  $\text{CH}_2=\text{CHCH}$ ), 5.23 (dd,  $J = 1.9\text{ Hz}$ ,

$J = 16.8$  Hz, 1H, CHH=CH, *trans*), 5.12 (dd,  $J = 1.7$  Hz,  $J = 10.1$  Hz, 1H, CHH=CH, *cis*), 4.50 (m, 1H, CHOH), 3.84 (dd,  $J = 0.5$  Hz,  $J = 7.3$  Hz, 1H, CHOMe), 3.22 (s, 3H, OCH<sub>3</sub>), 2.88 (d,  $J = 3.0$  Hz, 1H, OH), 2.77 (p,  $J = 7.0$  Hz, 1H, CHMe), 2.68 (dd,  $J = 9.3$  Hz,  $J = 17.5$  Hz, 1H, CH<sub>2</sub>C=O), 2.55 (dd,  $J = 2.7$  Hz,  $J = 17.5$  Hz, 1H, CH<sub>2</sub>C=O), 1.76 (d,  $J = 1.0$  Hz, 3H, CH=CCH<sub>3</sub>), 1.75 (d,  $J = 1.1$  Hz, 3H, CHI=CCH<sub>3</sub>), 1.13 (d,  $J = 8.0$  Hz, 3H, CHCH<sub>3</sub>).

**<sup>13</sup>C-NMR** (CDCl<sub>3</sub>, 100.6 MHz):  $\delta = 212.7$  (C=O), 145.3 (C<sub>q</sub>), 138.3 (C<sub>q</sub>), 132.4 (CH<sub>2</sub>=CH), 125.8 (CH<sub>2</sub>=CHCH), 117.6 (H<sub>2</sub>C=CH), 86.4 (CHOMe), 80.6 (CHI), 72.1 (CHOH), 57.0 (OCH<sub>3</sub>), 50.2 (CHMe), 47.6 (CH<sub>2</sub>C=O), 20.7 (CHCH<sub>3</sub>), 19.9 (CHI=CCH<sub>3</sub>), 13.0 (CH=CCH<sub>3</sub>).

**HRMS** Calcd. for C<sub>15</sub>H<sub>27</sub>INO<sub>3</sub> [M+NH<sub>4</sub>]<sup>+</sup>  $m/z$  396.1030. Found: 396.1036.

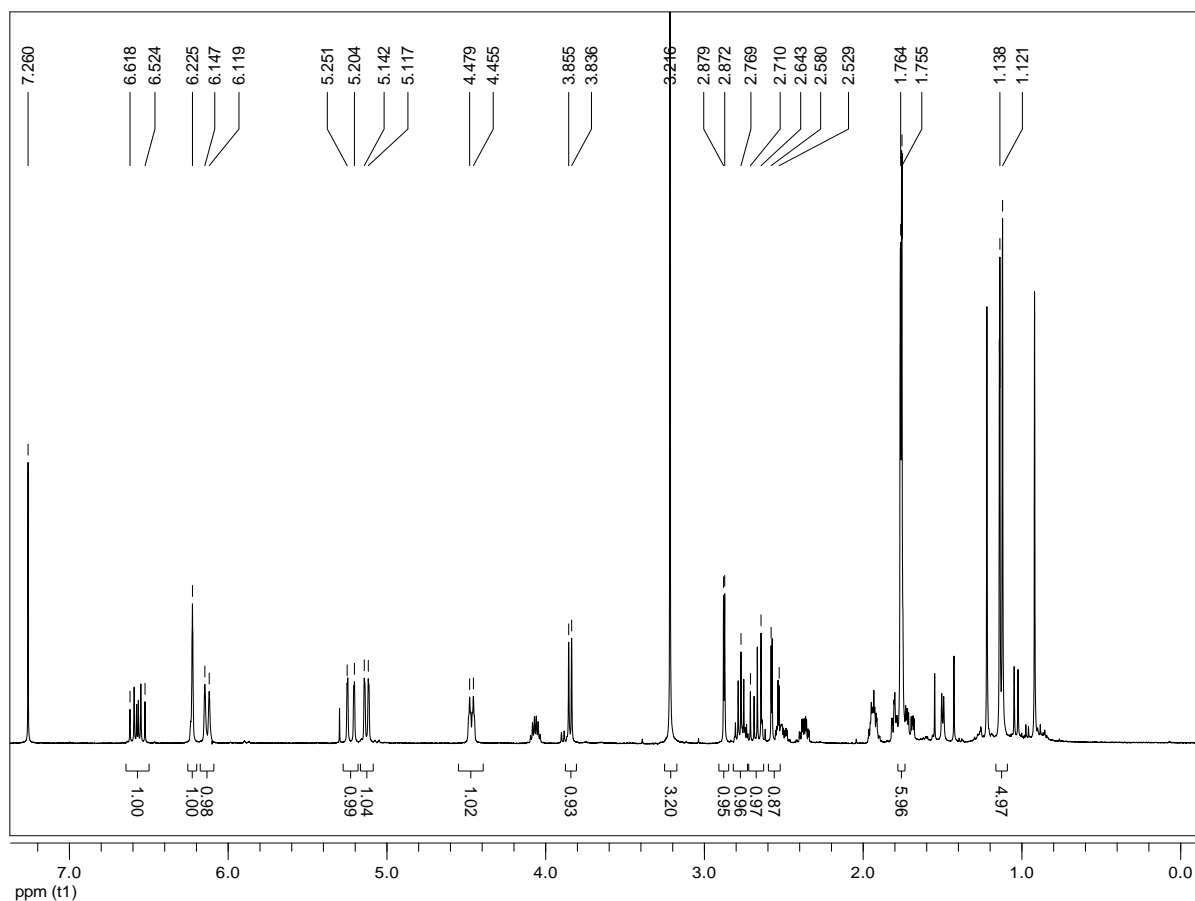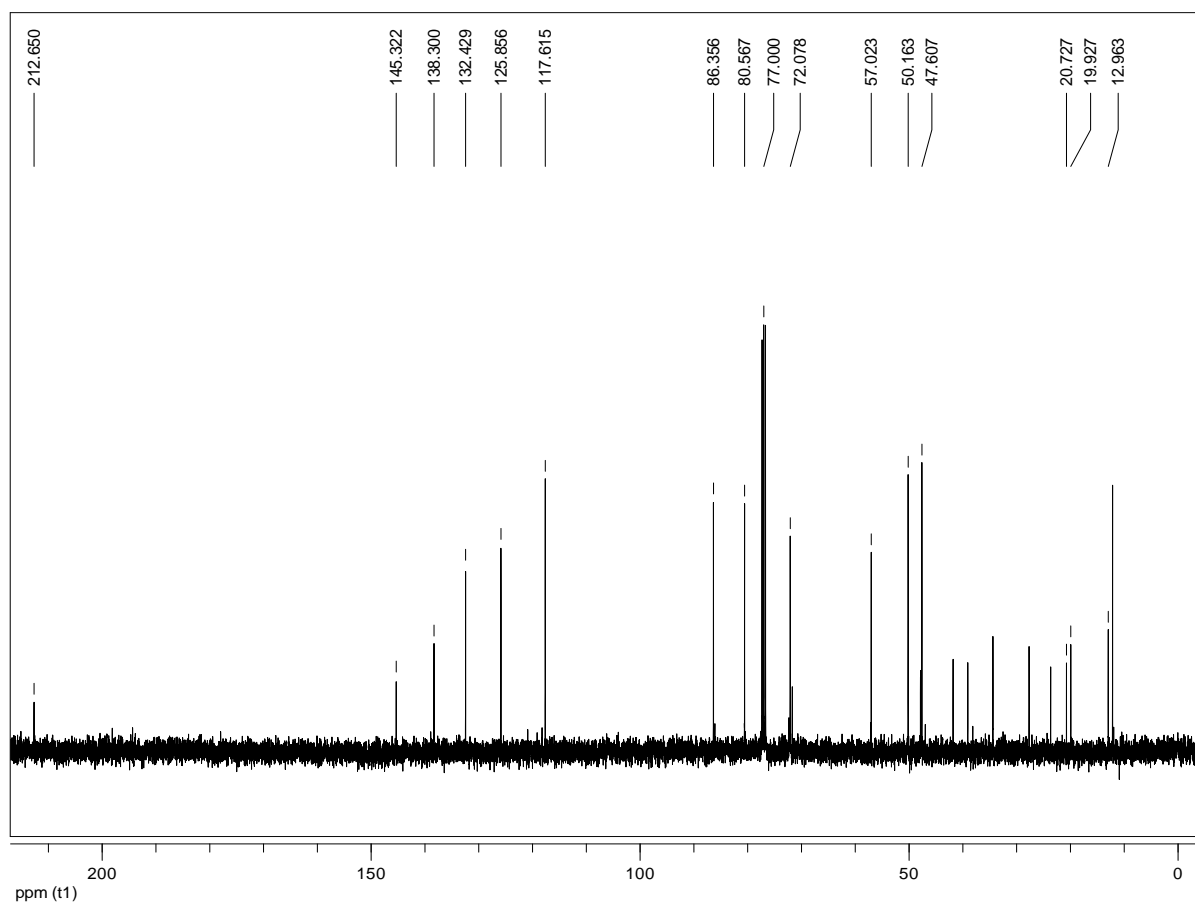

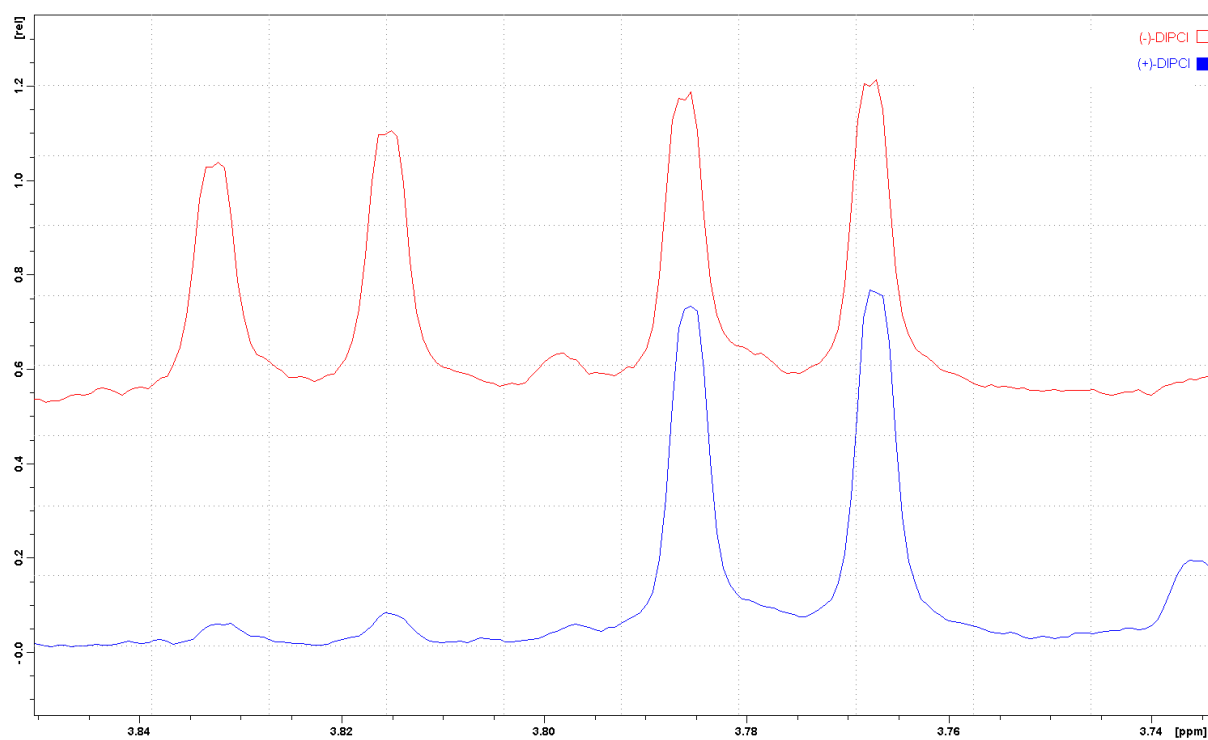

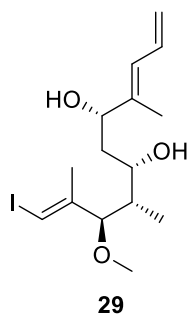

**(3E,5S,7S,8S,9R,10E)-11-iodo-9-methoxy-4,8,10-trimethylundeca-1,3,10-triene-**

**5,7-diol (29):** A solution of the borohydride (330 mg, 4.65 eq) in MeCN (1.1 mL) and AcOH (1.1 mL) was cooled to  $-40\text{ }^{\circ}\text{C}$  (MeCN/dry ice). To the frozen mixture was added a solution of the ketone **28** (102 mg, 270  $\mu\text{mol}$ , 1.00 eq) in MeCN (0.3 mL, rinsed with  $2 \times 0.3\text{ mL}$ ). The resulting thick slurry was stirred for a few minutes at the same temperature and was then aged in the freezer for 19.5 h. Afterwards the suspension was allowed to warm to rt and stirred for another 1 h. Then *Rochelle* salt (aq. sat.) was added to quench the reaction. A white suspension formed immediately. This mixture was stirred at rt for 1.5 h. Then  $\text{CH}_2\text{Cl}_2$  and  $\text{NaHCO}_3$  (sat. aq.) were added, the mixture was shaken, and the layers were separated. The aqueous phase was extracted with  $\text{CH}_2\text{Cl}_2$  ( $3 \times 10\text{ mL}$ ). The combined organic extracts were washed with  $\text{NaHCO}_3$  (sat. aq.) and with brine, dried over  $\text{MgSO}_4$  and concentrated under reduced pressure. The crude was purified by column chromatography (hex:Et<sub>2</sub>O 2:1  $\rightarrow$  hex:EtOAc 1:1) to afford the desired diol **29** (94.4 mg, 92%, dr = n.d.) as a colourless oil.

**TLC** (hex:EtOAc 1:1):  $R_f = 0.58$

**$[\alpha]_{\text{D}}^{24} = +34.9$**  ( $c = 0.29$ ,  $\text{CHCl}_3$ )

**$^1\text{H-NMR}$**  ( $\text{CDCl}_3$ , 400.1 MHz):  $\delta = 6.60$  (ddd,  $J = 10.2\text{ Hz}$ ,  $J = 10.8\text{ Hz}$ ,  $J = 16.8\text{ Hz}$ , 1H,  $\text{CH}_2=\text{CH}$ ), 6.21-6.16 (bd,  $J = 10.9\text{ Hz}$ , 1H,  $\text{CH}_2=\text{CHCH}$ ), 6.16-6.14 (m, 1H,  $\text{CHI}$ ), 5.23 (dd,  $J = 1.9\text{ Hz}$ ,  $J = 16.8\text{ Hz}$ , 1H,  $\text{CHH}=\text{CH}$ , *trans*), 5.12 (dd,  $J = 1.6\text{ Hz}$ ,  $J = 10.2\text{ Hz}$ , 1H,  $\text{CHH}=\text{CH}$ , *cis*), 4.39 (m, 1H,  $\text{CHOHC}_q\text{Me}$ ), 3.84 (bd,  $J = 3.1\text{ Hz}$ , 1H,  $\text{CHOMe}$ ), 3.86-3.78 (m, 1H,  $\text{CHMeCHOH}$ ), 3.27 (s, 3H,  $\text{OCH}_3$ ), 3.20 (d,  $J = 5.8\text{ Hz}$ , 1H,  $\text{CHMeCHOH}$ ), 2.64 (d,  $J = 4.2\text{ Hz}$ , 1H,  $\text{CHOHC}_q\text{Me}$ ), 1.85-1.68 (m, 9H,  $\text{CHMe}$ ,  $\text{CH}_2$ ,  $\text{CH}=\text{CCH}_3$ ,  $\text{CHI}=\text{CCH}_3$ ), 0.85 (d,  $J = 7.1\text{ Hz}$ , 3H,  $\text{CHCH}_3$ ).

**$^{13}\text{C-NMR}$**  ( $\text{CDCl}_3$ , 100.6 MHz):  $\delta = 145.2$  ( $\text{CHI}=\text{C}$ ), 140.3 ( $\text{CH}=\text{C}$ ), 132.6 ( $\text{CH}_2=\text{CH}$ ), 125.0 ( $\text{CH}_2=\text{CHCH}$ ), 117.2 ( $\text{H}_2\text{C}=\text{CH}$ ), 86.6 ( $\text{CHOMe}$ ), 78.2 ( $\text{CHI}$ ), 74.1 ( $\text{CHOHCMe}$ ), 71.4

(CHOHCHMe), 57.3 (OCH<sub>3</sub>), 40.7 (CHMe), 38.6 (CH<sub>2</sub>), 21.8 (CHI=CCH<sub>3</sub>), 13.3 (CH=CCH<sub>3</sub>), 11.0 (CHCH<sub>3</sub>).

**IR** ( $\nu$ /[cm<sup>-1</sup>]) 3408 (br), 2978, 2934, 2830, 1720, 1671, 1620, 1446, 1380, 1364, 1260, 1247, 1216, 1193, 1113, 1088, 1052, 1012, 989, 927, 907, 751 (s), 683, 665, 601, 507, 496, 484, 470, 458.

**HRMS** Calcd. for C<sub>15</sub>H<sub>25</sub>INaO<sub>3</sub> [M+Na]<sup>+</sup>  $m/z$  403.0741. Found: 403.0728.



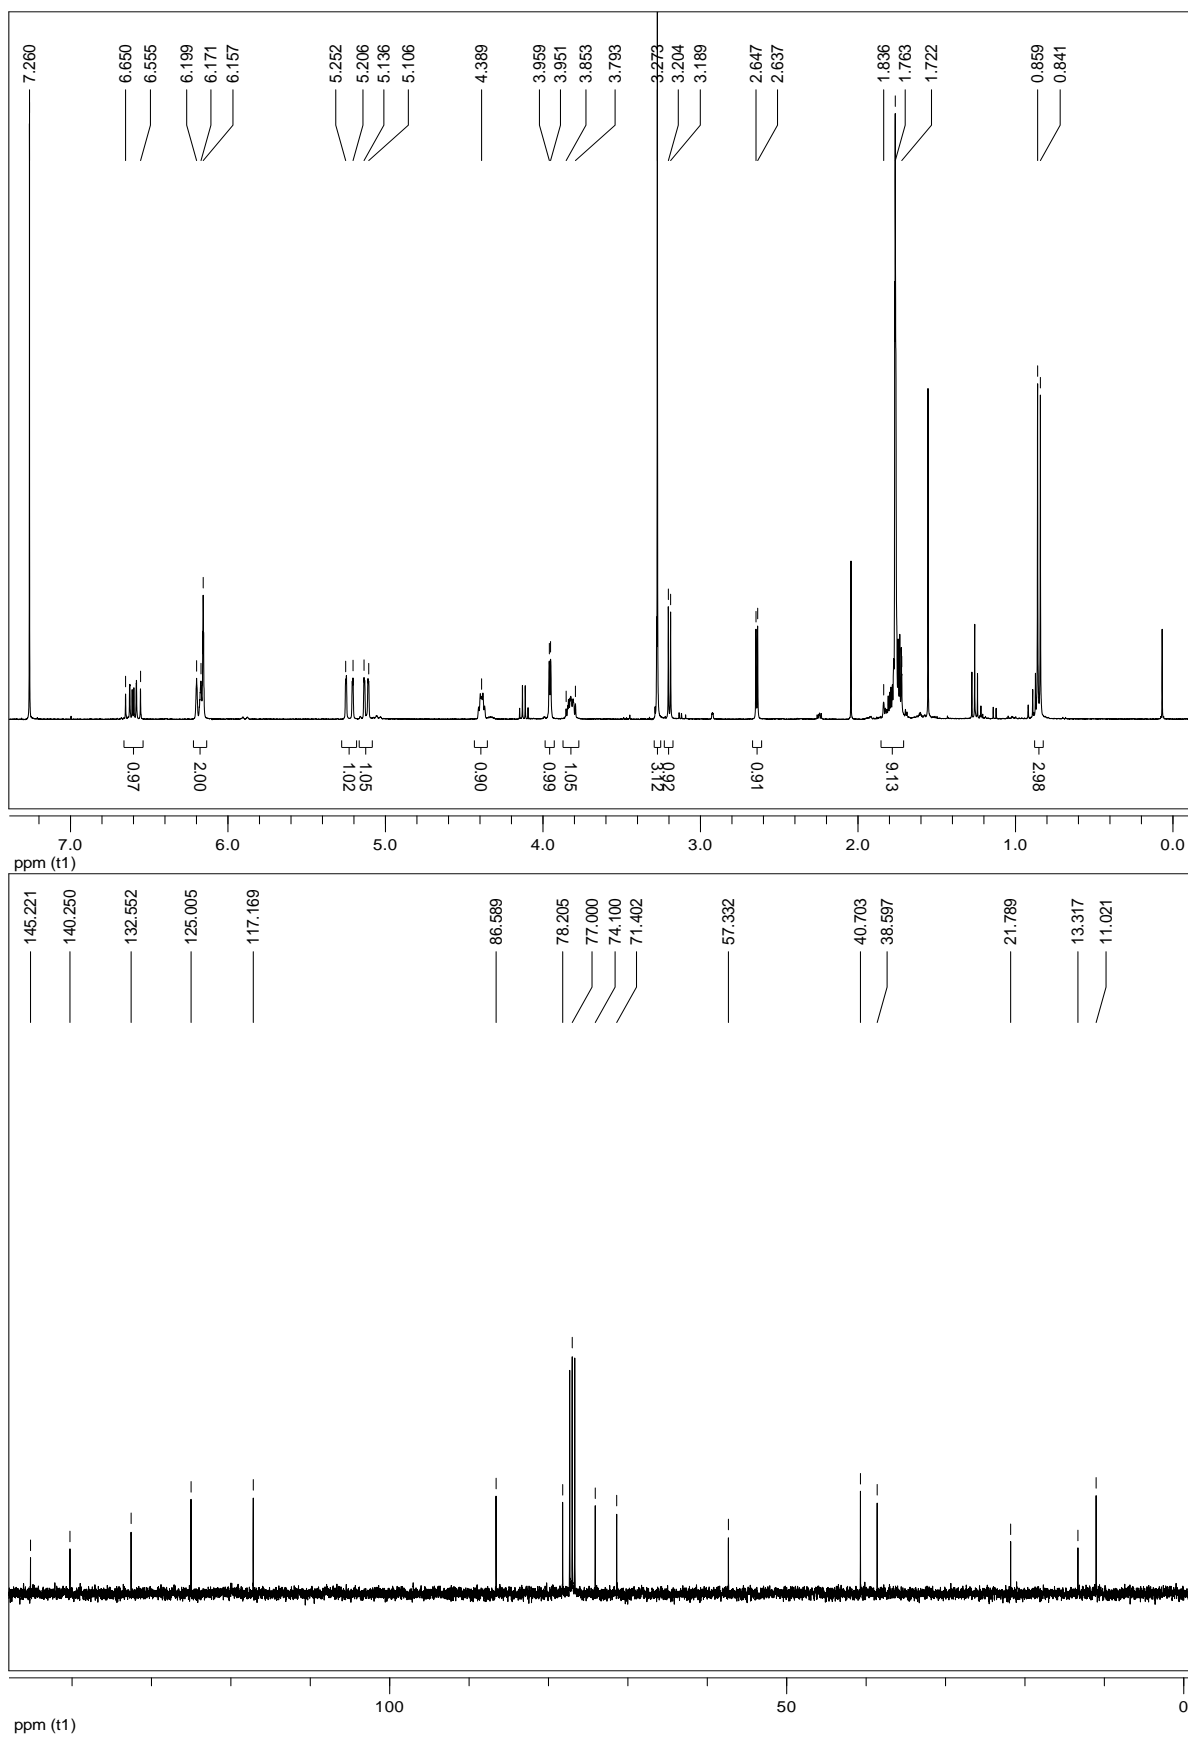

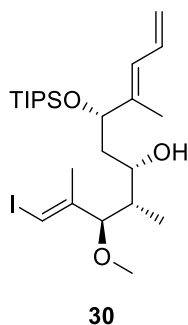

**(1*E*,3*R*,4*S*,5*S*,7*S*,8*E*)-1-iodo-3-methoxy-2,4,8-trimethyl-7-((triisopropylsilyl)oxy)-undeca-1,8,10-trien-5-ol (30):** To a solution of the diol **29** (85.5 mg, 0.225 mmol, 1.00 eq) in CH<sub>2</sub>Cl<sub>2</sub> (6 mL) over molecular sieves (3 Å beads) was added 2,6-lutidine (131 µL, 1.12 mmol, 5.00 eq) at rt. The mixture was stirred at rt for 5 min, then it was cooled to -78 °C and, after another 5 min stirring, TIPSOTf (60.0 µL, 0.225 mmol, 1.00 eq) was added. TLC after 10 min and after 25 min showed incomplete conversion. Therefore, more TIPSOTf (5 µL) was added after 32 min. After 40 min the reaction was complete and was thus quenched with NaHCO<sub>3</sub> (sat. aq.). The layers were separated and the aqueous phase was extracted with CH<sub>2</sub>Cl<sub>2</sub> (3×10 mL). Then the combined organic extracts were washed with brine, dried over MgSO<sub>4</sub> and the solvent was removed under reduced pressure. The crude was purified by column chromatography (hex:Et<sub>2</sub>O 7:1) to afford the desired product **30** as a colourless oil (109 mg, 91%), which turned solid in the freezer.

**TLC** (Hex:EtOAc 5:1): *R<sub>f</sub>* = 0.57

**[α]<sub>D</sub><sup>24</sup>** = +25.1 (*c* = 0.32, CHCl<sub>3</sub>)

**<sup>1</sup>H-NMR** (CDCl<sub>3</sub>, 400.1 MHz): δ = 6.60 (ddd, *J* = 10.2 Hz, *J* = 10.9 Hz, *J* = 16.8 Hz, 1H), 6.24-6.18 (bd, *J* = 11.0 Hz, 1H), 6.08 (mc, 1H), 5.19 (dd, *J* = 1.8 Hz, *J* = 16.8 Hz, 1H), 5.10 (dd, *J* = 1.7 Hz, *J* = 10.1 Hz, 1H), 4.50 (t, *J* = 4.3 Hz, 1H), 3.78-3.62 (m, 2H), 3.58 (d, *J* = 2.4 Hz, 1H), 3.22 (s, 3H), 1.77-1.66 (m, 3H), 1.73 (d, *J* = 2.4 Hz, 3H), 1.72 (d, *J* = 0.8 Hz, 3H), 1.14-1.01 (m, 21H), 0.84 (d, *J* = 7.0 Hz, 3H).

**<sup>13</sup>C-NMR** (CDCl<sub>3</sub>, 100.6 MHz): δ = 146.2, 138.9, 132.5, 125.8, 116.8, 86.5, 77.9, 76.3, 69.7, 57.2, 41.2, 38.0, 21.1, 18.03, 18.00, 13.9, 12.3, 10.1.

**IR** (ν/[cm<sup>-1</sup>]) 3511 (br), 2942 (s), 2893, 2866 (s), 2360, 2340, 2333, 1721, 1696, 1653, 1621, 1601, 1463, 1380, 1256, 1194, 1136, 1112, 1089 (s), 1063 (s), 1011, 988 (s), 948, 883 (s), 823, 757, 680 (s), 601, 577, 512, 495, 464, 445, 428.

**HRMS** Calcd. for C<sub>24</sub>H<sub>45</sub>INaO<sub>3</sub>Si [M+Na]<sup>+</sup> *m/z* 559.2075. Found: 559.2069.

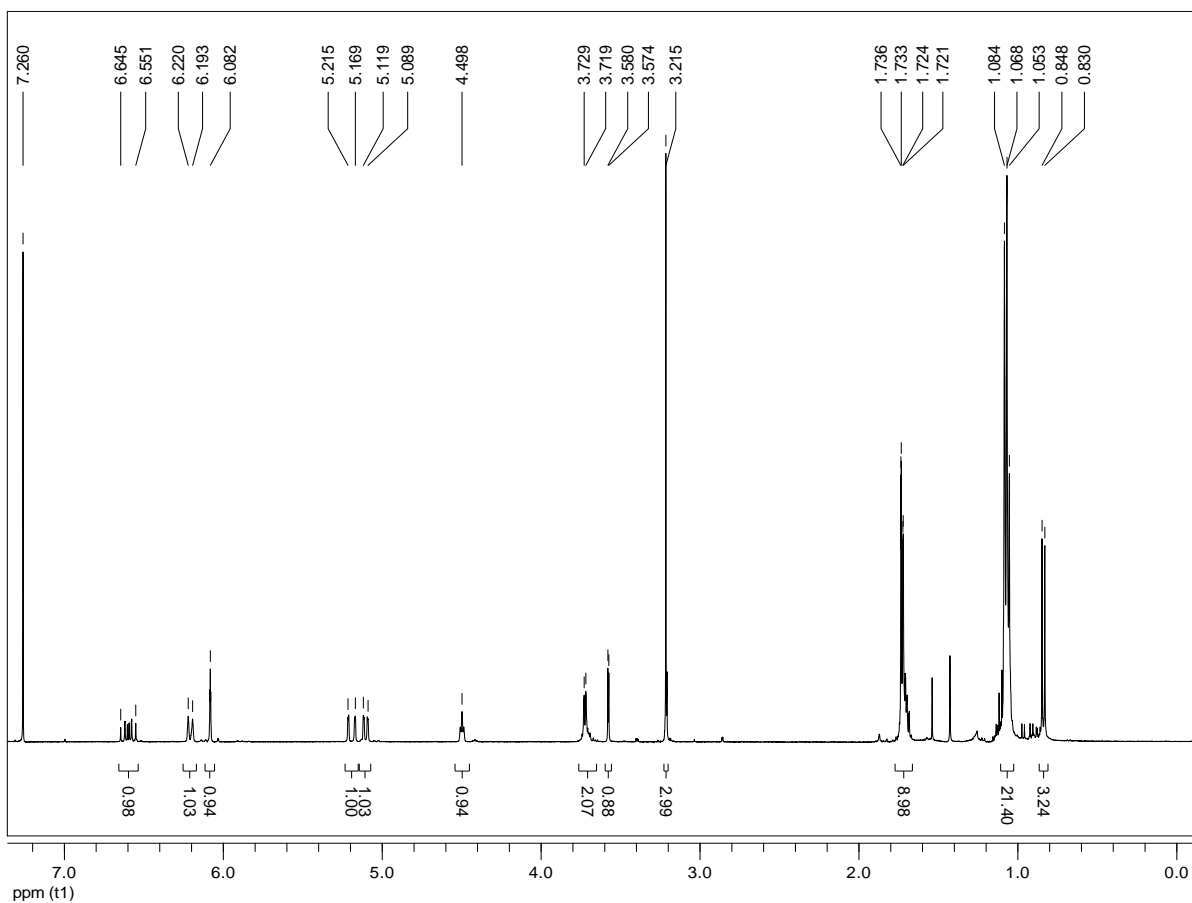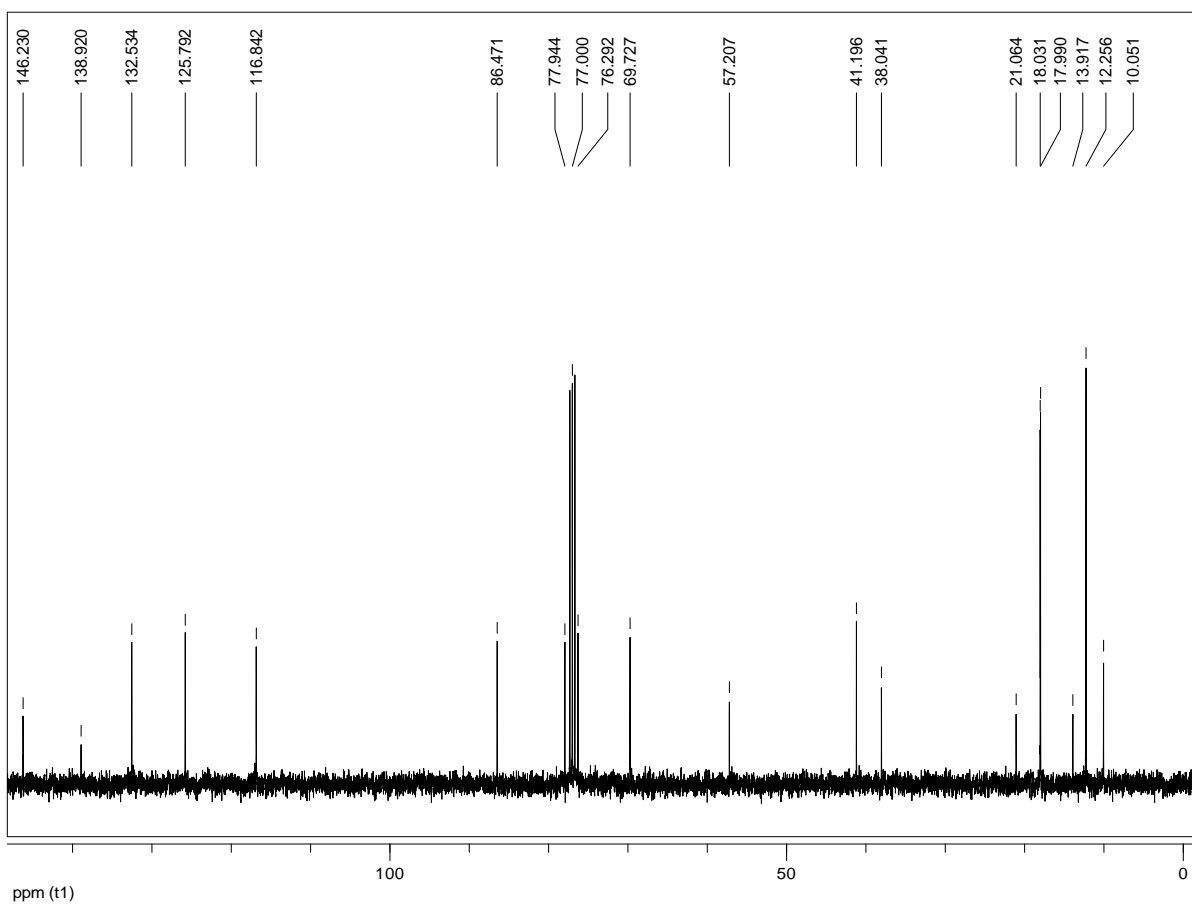

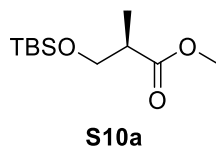

**Methyl (*R*)-3-(*tert*-butyldimethylsilyloxy)-2-methylpropanoate (S10a):** To a stirring solution of (*R*)-(-)-3-hydroxyisobutyric acid methyl ester (**36**) (4.00 mL, 36.1 mmol, 1.0 equiv) in CH<sub>2</sub>Cl<sub>2</sub> (360 mL) was added at 0 °C imidazole (3.69 g, 54.1 mmol, 1.5 equiv) followed by TBSCl (6.53 g, 43.3 mmol, 1.2 equiv). After stirring for 30 min at 0°C (the reaction was almost complete) and for 2 h at rt, the reaction mixture was quenched at rt with sat. NH<sub>4</sub>Cl (70 mL) and water (50 mL). The layers were separated and the aqueous layer was extracted with CH<sub>2</sub>Cl<sub>2</sub> (2 x 60 mL). The combined organic extracts were dried over MgSO<sub>4</sub> and concentrated under reduced pressure. The residue was purified by column chromatography (hexane → hexane/ Et<sub>2</sub>O, 5:1) to give **S10a** (8.33 g, 99%) as a colorless oil. The analytical data were identical to those reported in the literature.<sup>1</sup>

**R<sub>f</sub>** = 0.68 (hexane/Et<sub>2</sub>O, 5:1)

**<sup>1</sup>H-NMR** (400.1 MHz, CDCl<sub>3</sub>): δ = 3.77 (dd, *J* = 6.9, 9.7 Hz, 1H), 3.67 (s, 3H), 3.64 (dd, *J* = 6.1, 9.7 Hz, 1H), 2.64 (mc, 1H), 1.13 (d, *J* = 7.0 Hz, 3H), 0.87 (s, 9H), 0.03 (s, 6H).

**<sup>13</sup>C-NMR** (100.6 MHz, CDCl<sub>3</sub>): δ = 175.5, 65.2, 51.5, 42.5, 25.8, 18.2, 13.4, -5.5.

**IR** (neat, ν/cm<sup>-1</sup>): 2953m, 2930m, 2858m, 1742s, 1462m, 1435w, 1389w, 1254w, 1254m, 1198m, 1175m, 1092s, 835s, 775s, 666w.

**HRMS (ESI):** *m/z* calcd for C<sub>11</sub>H<sub>24</sub>NaO<sub>3</sub>Si [M]<sup>+</sup>: 255.1387, found: 255.1392.

<sup>1</sup> Keck, G. E.; Giles, R. L.; Cee, V. J.; Wager, C. A.; Yu, T.; Kraft, M. B. *J. Org. Chem.* **2008**, 73, 9675–9691.

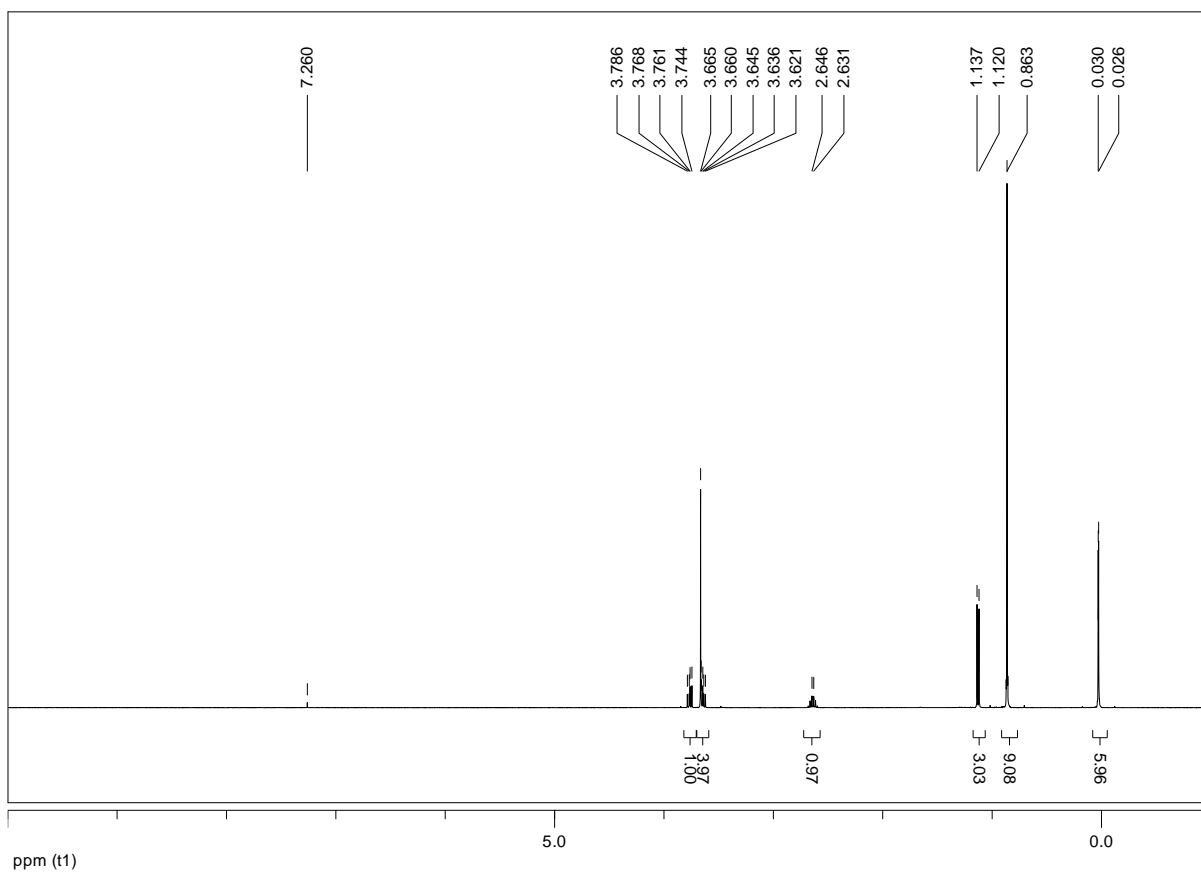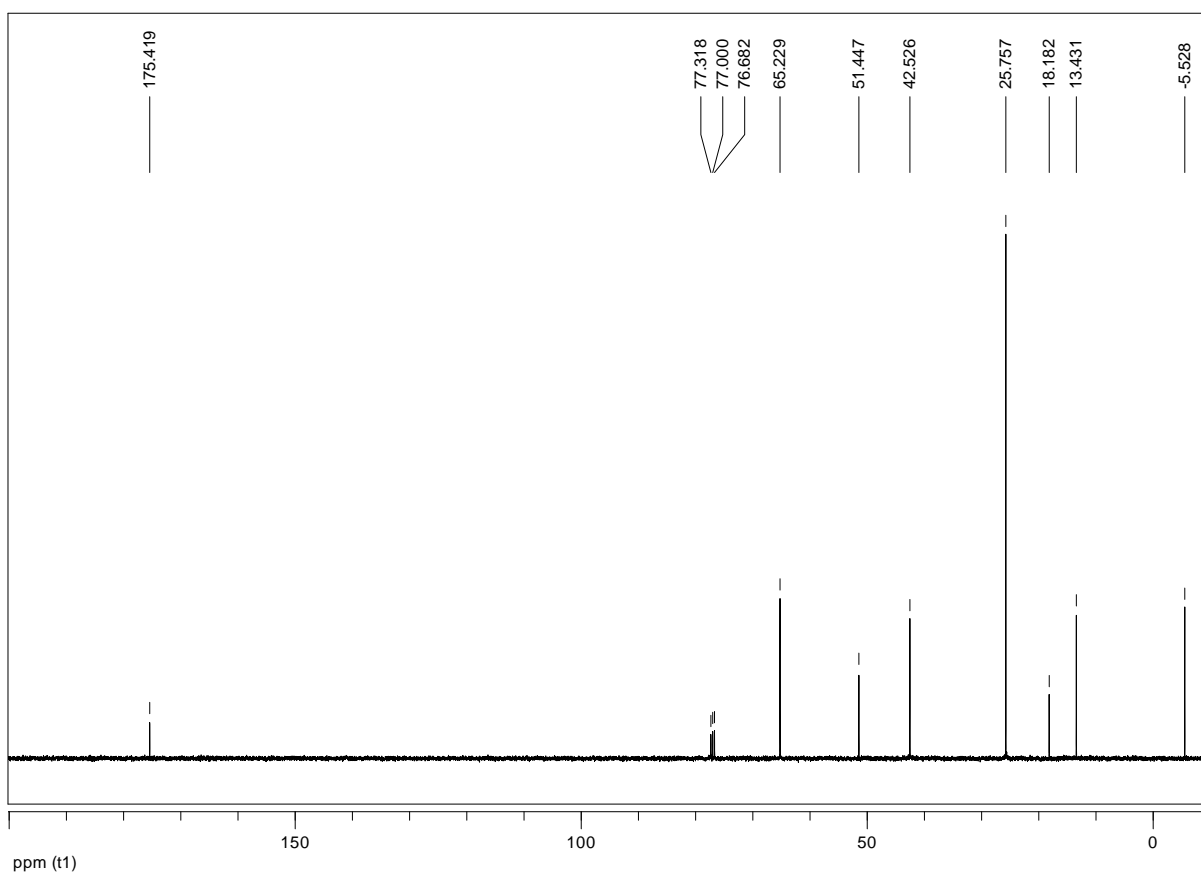

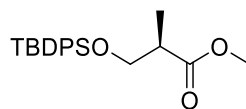**S10b**

**Methyl (*R*)-3-((*tert*-butyldiphenylsilyl)oxy)-2-methylpropanoate (S10b):** To a stirring solution of (*R*)-(-)-3-hydroxyisobutyric acid methyl ester (**36**) (350 mg, 2.96 mmol, 1.0 equiv) in DMF (3 mL) was added at rt imidazole (303 mg, 4.45 mmol, 1.5 equiv) followed by TBDPSCl (0.92 mL, 3.55 mmol, 1.2 equiv) in one portion. After stirring for 18 h at rt, the reaction mixture was diluted with Et<sub>2</sub>O (60 mL) and water (15 mL) and the layers were separated. The aqueous layer was extracted once with Et<sub>2</sub>O (30 mL). The combined organic extracts were washed with brine (20 mL), dried over MgSO<sub>4</sub> and concentrated under reduced pressure. The residue was purified by column chromatography (hexane/EtOAc, 200:1 → 100:1, then hexane/Et<sub>2</sub>O, 5:1) to give **S10b** (971 mg, 92%) as a colorless oil.<sup>2</sup>

**R<sub>f</sub>** = 0.62 (hexane/Et<sub>2</sub>O, 5:1)

**<sup>1</sup>H-NMR** (400.1 MHz, CDCl<sub>3</sub>): δ = 7.72-7.62 (m, 4H), 7.47-7.35 (m, 6H), 3.84 (dd, *J* = 6.9, 9.7 Hz, 1H), 3.74 (dd, *J* = 5.8, 9.8 Hz, 1H), 3.69 (s, 3H), 2.73 (m, 1H), 1.17 (d, *J* = 7.0 Hz, 3H), 1.05 (s, 9H).

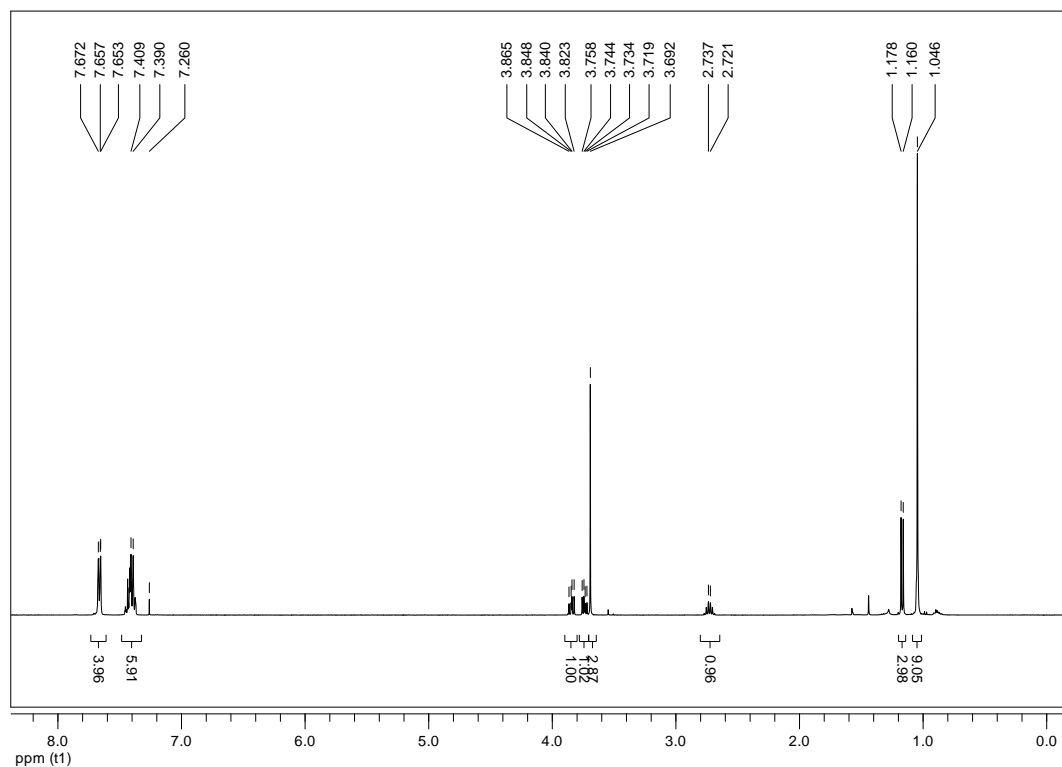

<sup>2</sup> The analytical data were identical to those reported in the literature: Fürstner A.; Kattnig, E.; Lepage, O. *J. Am. Chem. Soc.* **2006**, *128*, 9194-9204.

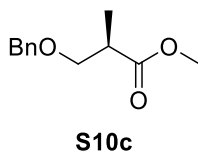

**Methyl (*R*)-3-(benzyloxy)-2-methylpropanoate (S10c):** To a solution of (*R*)-(-)-3-hydroxyisobutyric acid methyl ester (**36**) (318 mg, 2.69 mmol, 1.0 equiv) in CH<sub>2</sub>Cl<sub>2</sub>/cyclohexane (1:1, 9.1 mL) was added benzyl trichloroacetimidate (0.60 mL, 3.23 mmol, 1.2 equiv) and a few drops of TfOH (until the reaction began and the imidate salt started to precipitate). After stirring for 4 h at rt, the reaction mixture was diluted with sat. NaHCO<sub>3</sub> (20 mL) and CH<sub>2</sub>Cl<sub>2</sub> (20 mL). The aqueous layer was extracted with CH<sub>2</sub>Cl<sub>2</sub> (3 x 30 mL). The combined organic extracts were washed with sat. NaHCO<sub>3</sub> and brine, dried over MgSO<sub>4</sub>, filtered and the solvent was removed under reduced pressure. The residue was purified by column chromatography (hexane/EtOAc, 30:1 → 20:1) to give **S10c** as a colorless oil (430 mg, 77%).<sup>3</sup>

**R<sub>f</sub>** = 0.60 (hexane/EtOAc, 5:1)

**<sup>1</sup>H-NMR** (400.1 MHz, CDCl<sub>3</sub>): δ = 7.39-7.25 (m, 5H), 4.53 (s, 2H), 3.70 (s, 3H), 3.67 (dd, *J* = 7.3, 9.1 Hz, 1H), 3.50 (dd, *J* = 5.9, 9.1 Hz, 1H), 2.80 (m, 1H), 1.19 (d, *J* = 7.1 Hz, 3H).

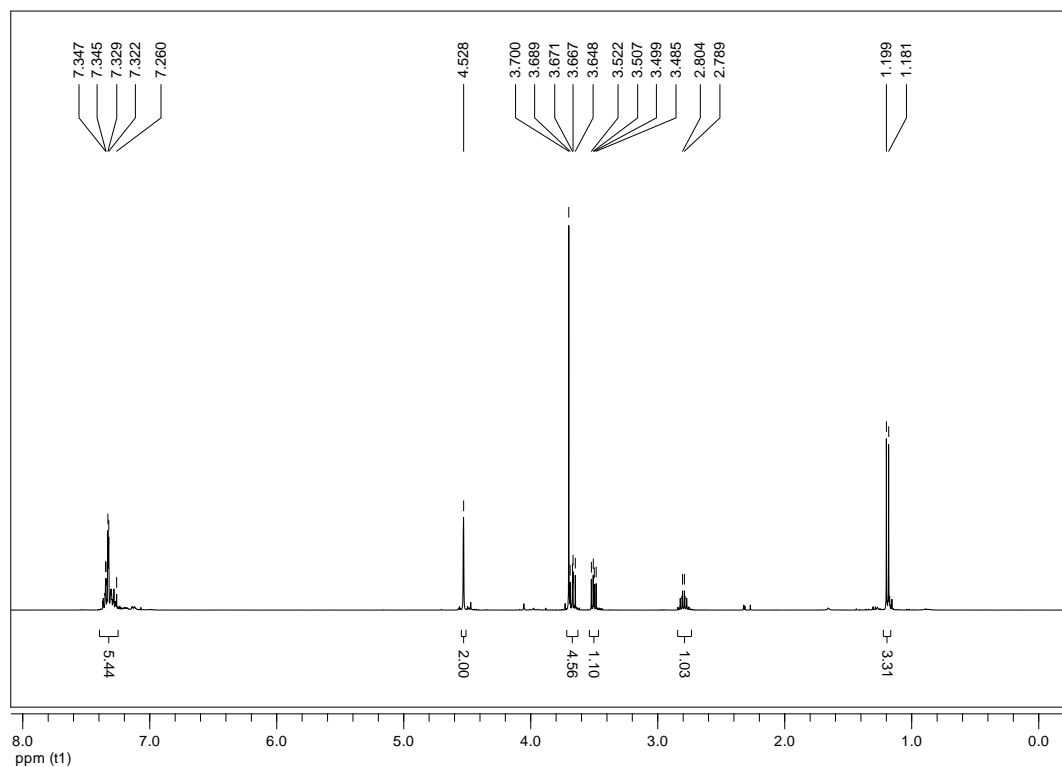

<sup>3</sup> The analytical data were identical to those reported in the literature: Kanada, R. M.; Itoh, D.; Nagai, M.; Nijima, J.; Asai, N.; Yoshiharu, M.; Abe, S.; Kotake, Y. *Angew. Chem. Int. Ed.* **2007**, *46*, 4350-4355.

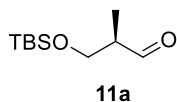

**(*R*)-3-(*tert*-butyldimethylsilyloxy)-2-methylpropanal (**11a**):** To a stirring solution of **S10a** (4.30 g, 18.5 mmol, 1.0 equiv) in CH<sub>2</sub>Cl<sub>2</sub> (185 mL) was added dropwise at –78 °C DIBAL (19.0 mL, 19.0 mmol, 1.0 equiv, 1.0 M in CH<sub>2</sub>Cl<sub>2</sub>) with the aid of a mechanical syringe pump over 1.25 h. After the addition was complete, the reaction mixture was stirred for 1.25 h at –78 °C. The reaction mixture was quenched by addition of sat. *Rochelle* salt (100 mL) and stirred for 30 min at rt. The suspension was filtered over celite, the layers were separated and the aqueous layer was extracted with CH<sub>2</sub>Cl<sub>2</sub> (2 x 70 mL). The combined organic extracts were dried over MgSO<sub>4</sub> and concentrated under reduced pressure. The crude product **11a** was directly used for the next step without further purification due to danger of racemization. The analytical data were identical to those reported in the literature.<sup>4</sup>

**R<sub>f</sub>** = 0.60 (hexane/EtOAc, 10:1)

**<sup>1</sup>H-NMR** (400.1 MHz, CDCl<sub>3</sub>): δ = 9.74 (d, *J* = 1.7 Hz, 1H), 3.86 (dd, *J* = 5.2, 10.2 Hz, 1H), 3.81 (dd, *J* = 6.3, 10.2 Hz, 1H), 2.53 (mc, 1H), 1.09 (d, *J* = 7.0 Hz, 3H), 0.88 (s, 9H), 0.05 (s, 6H).

**<sup>13</sup>C-NMR** (100.6 MHz, CDCl<sub>3</sub>): δ = 204.6, 63.4, 48.8, 25.8, 18.2, 10.3, –5.5.

<sup>4</sup> Keck, G. E.; Giles, R. L.; Cee, V. J.; Wager, C. A.; Yu, T.; Kraft, M. B. *J. Org. Chem.* **2008**, 73, 9675–9691.



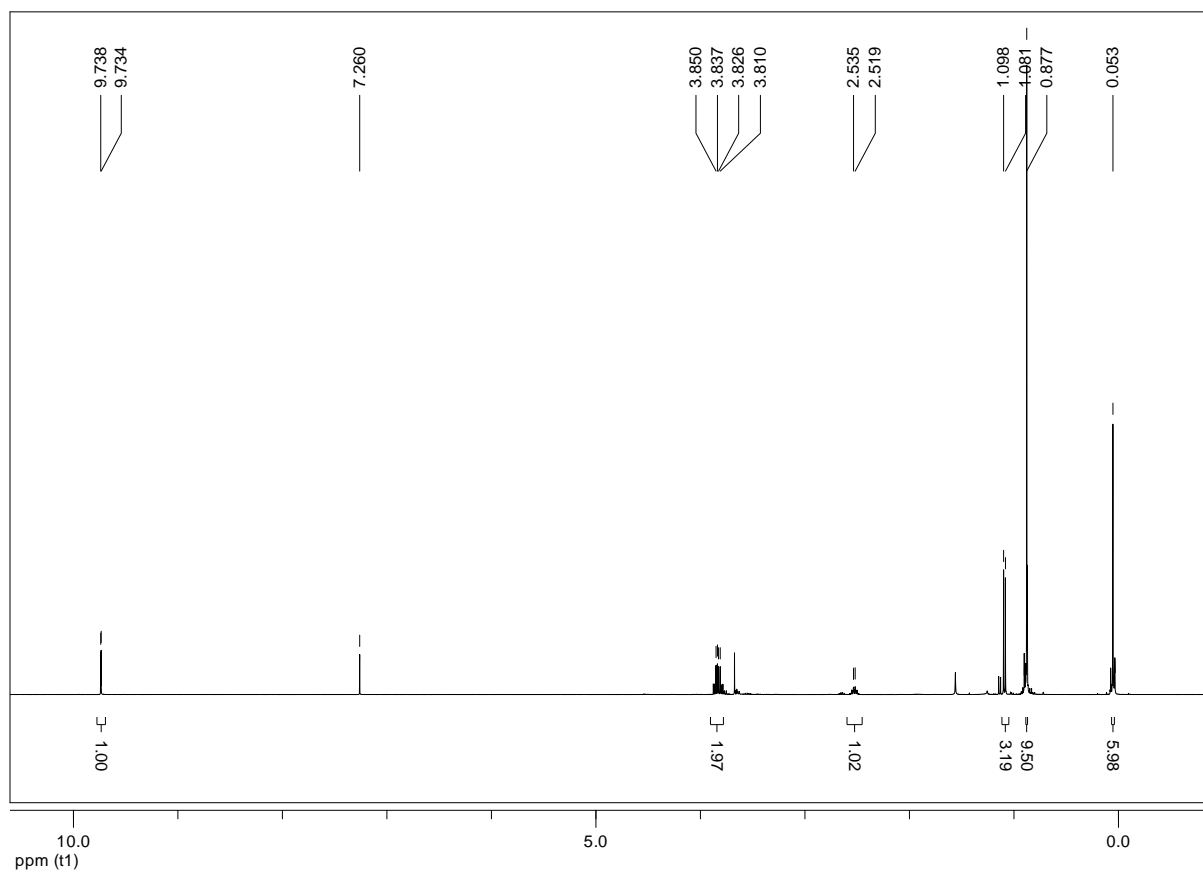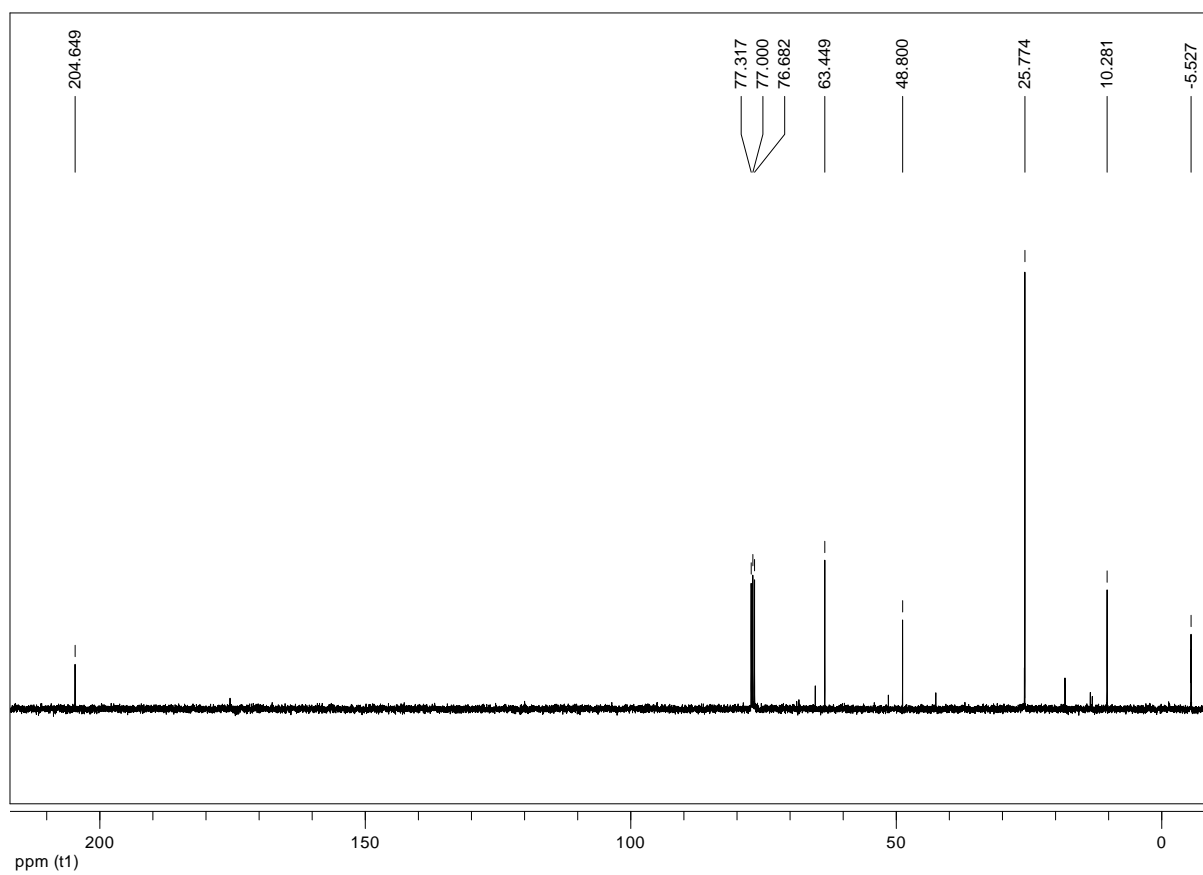

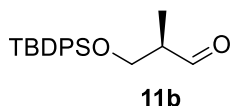

**(R)-3-((*tert*-Butyldiphenylsilyl)oxy)-2-methylpropanal (11a):** To a stirring solution of **S10b** (356 mg, 1.00 mmol, 1.0 equiv) in CH<sub>2</sub>Cl<sub>2</sub> (10 mL) was added dropwise at –78 °C DIBAL (1.00 mL, 1.00 mmol, 1.0 equiv, 1.0 M in CH<sub>2</sub>Cl<sub>2</sub>) over 20 min. After the addition was complete, the reaction mixture was stirred for 1.5 h at –78 °C. The reaction mixture was quenched by addition of sat. *Rochelle* salt (15 mL) and stirred for 1 h at rt. The suspension was then diluted with dichloromethane, the layers were separated and the aqueous layer was extracted with CH<sub>2</sub>Cl<sub>2</sub> (3 x 40 mL). The combined organic extracts were washed with brine, dried over MgSO<sub>4</sub> and concentrated under reduced pressure. The crude product **11b** was filtered over celite (eluting with hexane), concentrated and was directly used for the next step without further purification due to danger of racemization.<sup>5</sup>

**R<sub>f</sub>** = 0.60 (hexane/Et<sub>2</sub>O, 5:1)

**<sup>1</sup>H-NMR** (400.1 MHz, CDCl<sub>3</sub>): δ = 9.77 (d, *J* = 1.6 Hz, 1H), 7.74-7.56 (m, 4H), 7.48-7.33 (m, 6H), 3.91 (dd, *J* = 5.0, 10.3 Hz, 1H), 3.85 (dd, *J* = 6.3, 10.3 Hz, 1H), 2.57 (mc, 1H), 1.11 (d, *J* = 7.0 Hz, 3H), 1.05 (s, 9H).

<sup>5</sup> The analytical data were identical to those reported in the literature: Fürstner A.; Kattnig, E.; Lepage, O. *J. Am. Chem. Soc.* **2006**, 128, 9194-9204.

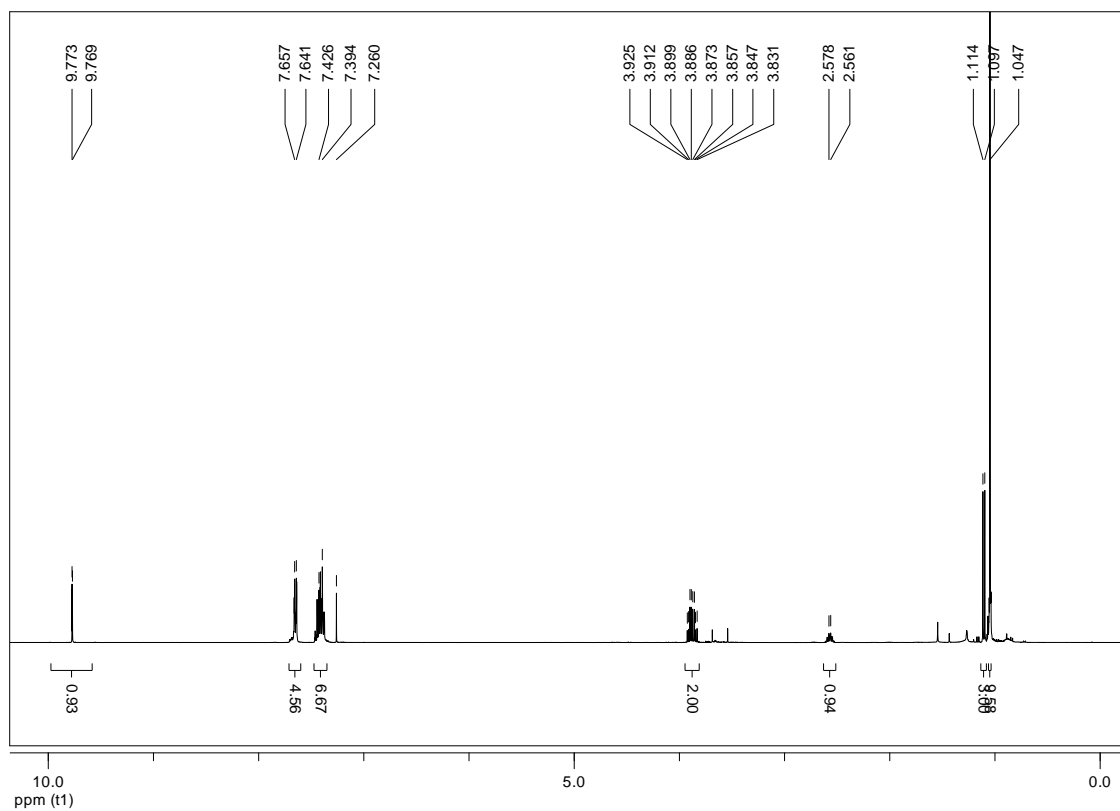

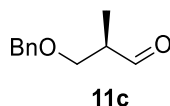

**(R)-3-(Benzyloxy)-2-methylpropanal (11c):** To a stirring solution of **S10c** (61.2 mg, 0.29 mmol, 1.0 equiv) in CH<sub>2</sub>Cl<sub>2</sub> (2.8 mL) was added dropwise at –78 °C DIBAL (0.38 mL, 0.38 mmol, 1.3 equiv, 1.0 M in CH<sub>2</sub>Cl<sub>2</sub>) over 30 min. After the addition was complete, the reaction mixture was stirred for 1 h at –78 °C. The reaction mixture was quenched by addition of sat. *Rochelle* salt (10 mL) and stirred for 1 h at rt. The suspension was then diluted with CH<sub>2</sub>Cl<sub>2</sub>, the layers were separated and the aqueous layer was extracted with CH<sub>2</sub>Cl<sub>2</sub> (3 x 20 mL). The combined organic extracts were washed with brine, dried over MgSO<sub>4</sub> and concentrated under reduced pressure. The crude product **1c** was used for the next step without further purification due to danger of racemization.<sup>6</sup>

**R<sub>f</sub>** = 0.42 (hexane/EtOAc, 5:1)

**<sup>1</sup>H-NMR** (400.1 MHz, CDCl<sub>3</sub>): δ = 9.73 (d, *J* = 1.5 Hz, 1H), 7.39-7.26 (m, 5H), 4.53 (s, 2H), 3.69 (dd, *J* = 6.3, 9.8 Hz, 1H), 3.65 (dd, *J* = 3.9, 9.2 Hz, 1H), 2.67 (m<sub>c</sub>, 1H), 1.14 (d, *J* = 7.1 Hz, 3H).

<sup>6</sup> The analytical data were identical to those reported in the literature: Paquette, L. A.; Guevel, R.; Sakamoto, S.; Kim, I. H.; Crawford, J. *J. Org. Chem.* **2003**, *68*, 6096-6107.

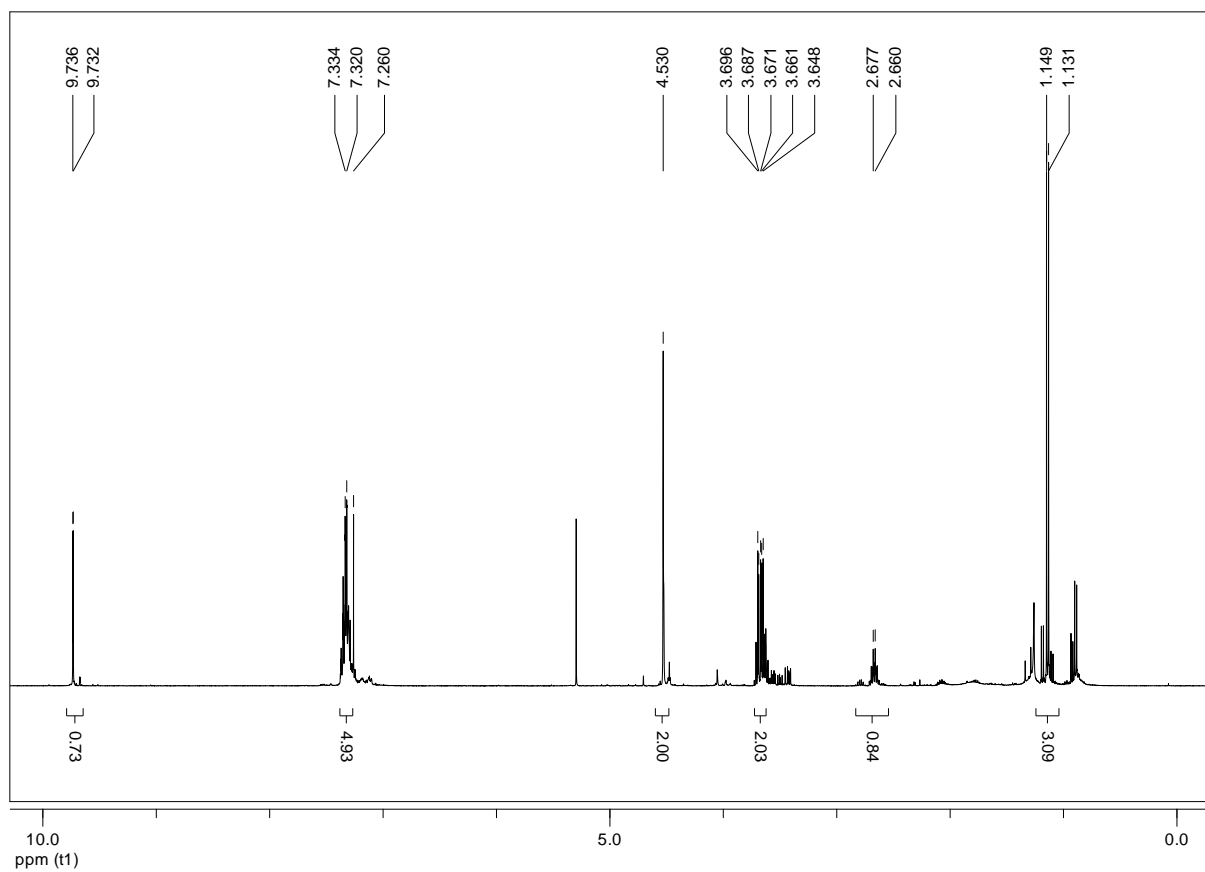

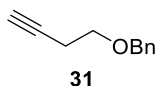

**((But-3-yn-1-yloxy)methyl)benzene (31):** A solution of 3-butyn-1-ol (2.0 mL, 26 mmol, 1.0 equiv) in THF (16 mL) was added dropwise to a suspension of NaH (1.3 g, 54 mmol, 2.1 equiv) in THF (28 mL) at 0 °C. After the adding TBAI (50 mg, 0.1 mmol, 0.5 mol%) and benzylbromide (3.5 mL, 29 mmol, 1.1 equiv) to the reaction mixture, stirring was continued for 1.5 h at 0 °C and overnight at rt. The reaction mixture was quenched at 0 °C with crushed ice until a clear, biphasic solution was formed. The layers were separated and the aqueous phase was extracted with EtOAc (2 x 60 mL). The combined organic extracts were washed with water and brine, dried over MgSO<sub>4</sub> and concentrated under reduced pressure. The residue was purified by column chromatography (hexane/EtOAc, 90:1 → 80:1 → 60:1, then hexane/Et<sub>2</sub>O, 10:1) to provide **31** (4.22 g, quant) as a yellowish oil.<sup>7</sup>

**R<sub>f</sub>** = 0.57 (hexane/Et<sub>2</sub>O, 10:1)

**<sup>1</sup>H-NMR** (400.1 MHz, CDCl<sub>3</sub>): δ = 7.44-7.27 (m, 5H), 4.59 (s, 2H), 3.63 (t, *J* = 6.9 Hz, 2H), 3.63 (t, *J* = 6.9 Hz, 2H), 2.53 (dt, *J* = 2.7, 7.0 Hz, 2H), 2.02 (t, *J* = 2.7 Hz, 1H).

**<sup>13</sup>C-NMR** (100.6 MHz, CDCl<sub>3</sub>): δ = 138.0, 128.3, 127.6, 81.2, 72.9, 69.3, 68.1, 19.8.

<sup>7</sup> The analytical data were identical to those reported: Yadav, J. S.; Srihari, P. *Tetrahedron Asymmetry* **2004**, *15*, 81-89.

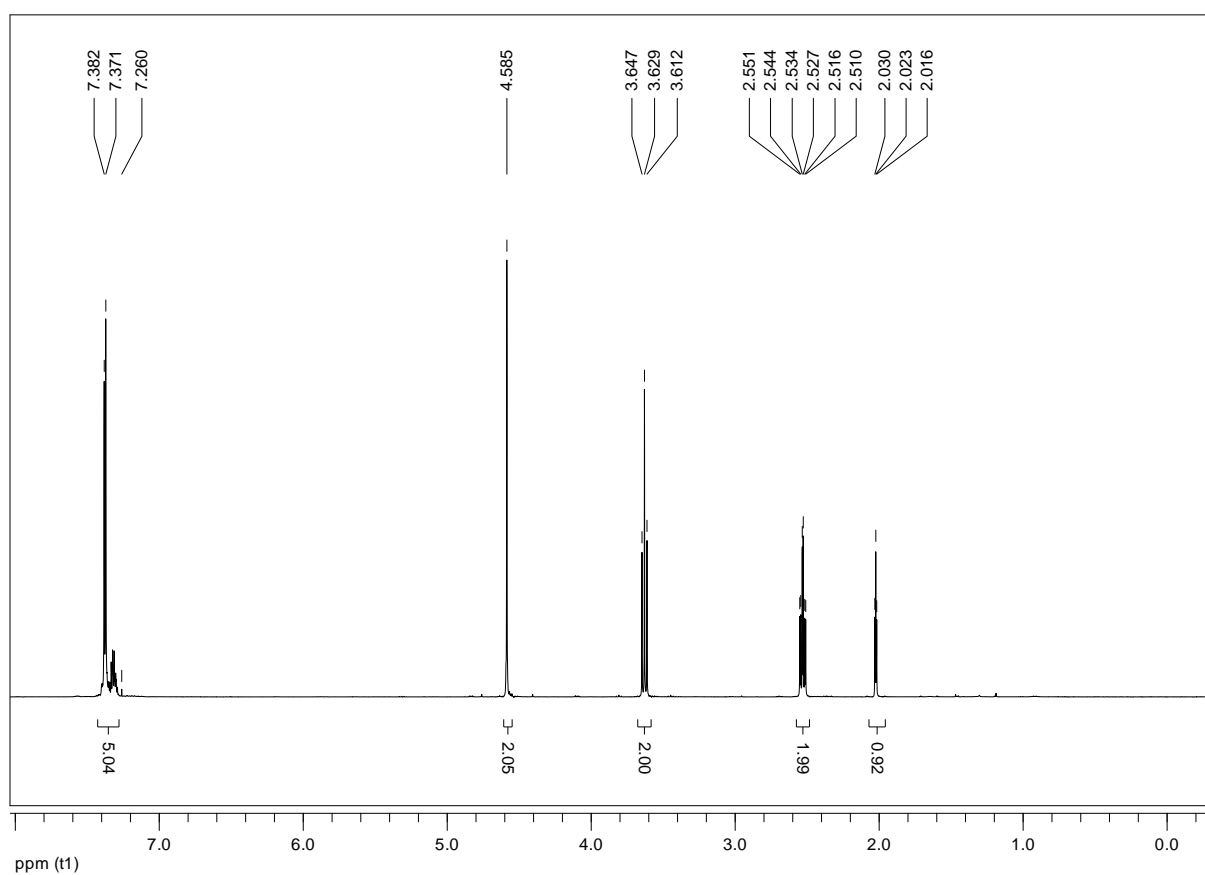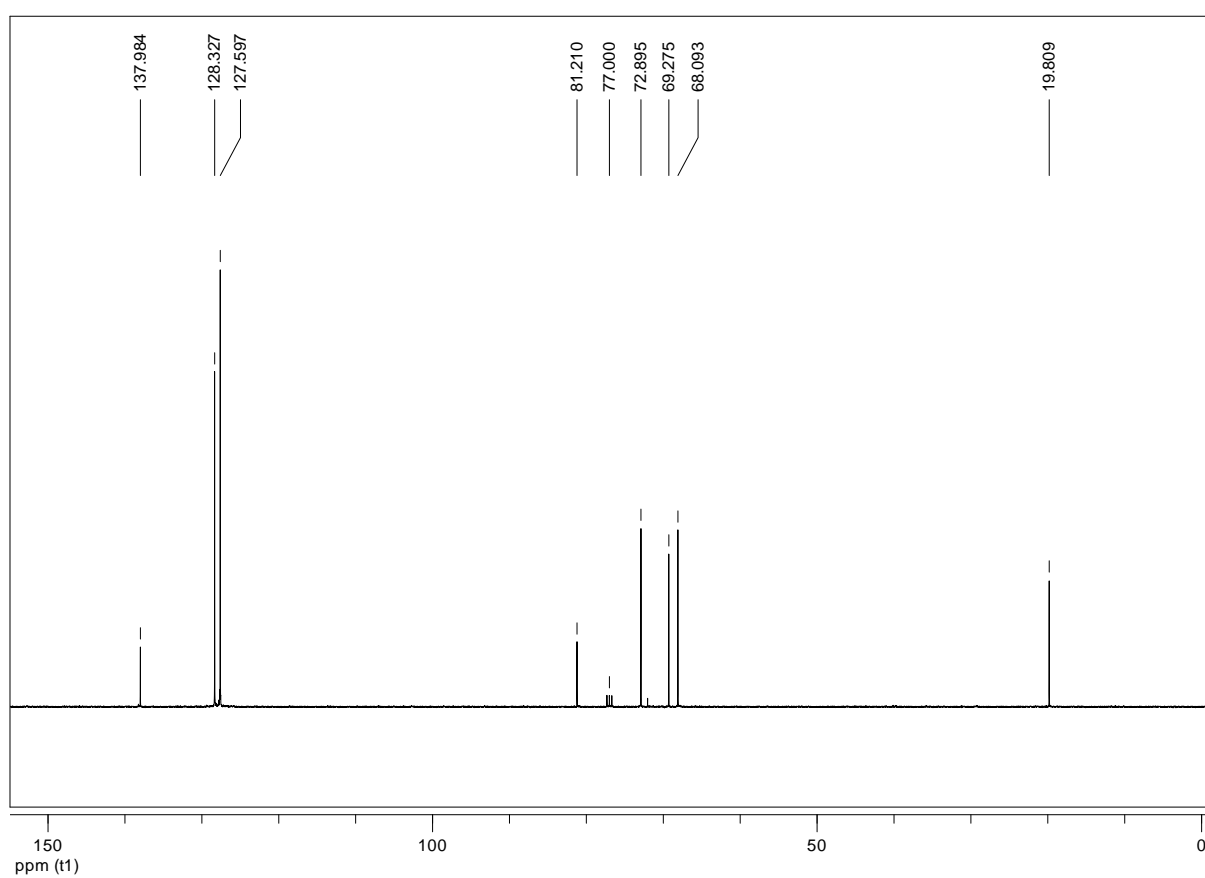

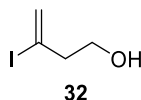

**3-Iodobut-3-en-1-ol (32):** To a suspension of NaI (5.99 g, 40.0 mmol, 2.0 equiv) in acetonitrile (28 mL) was added TMSCl (5.07 mL, 40.0 mmol, 2.0 equiv) followed by water (0.36 mL, 20.0 mmol, 1.0 equiv). After 10 min, a solution of **32** (3.20 g, 20.0 mmol, 1.0 equiv) in acetonitrile (7 mL) was added to the suspension and the reaction mixture was stirred for 1 h at rt. The reaction was quenched with water (70 mL) and extracted with Et<sub>2</sub>O (3 x 120 mL). The combined organic extracts were washed with brine, dried over MgSO<sub>4</sub> and concentrated under reduced pressure. The residue was purified by column chromatography (hexane/Et<sub>2</sub>O, 10:1 → 5:1, then hexane/EtOAc, 5:1 → 3:1) to provide iodoalcohol **32** (1.59 g, 40%) as a brown liquid.<sup>8</sup>

**R<sub>f</sub>** = 0.33 (hexane/EtOAc, 1:1)

**<sup>1</sup>H-NMR** (400.1 MHz, CDCl<sub>3</sub>): δ = 6.14 (m<sub>c</sub>, 1H), 5.81 (m<sub>c</sub>, 1H), 3.71 (t, *J* = 6.0 Hz, 2H), 2.60 (dt, *J* = 1.0, 6.0 Hz, 2H), 2.30 (brs, 1H).

**<sup>13</sup>C-NMR** (100.6 MHz, CDCl<sub>3</sub>): δ = 128.4, 107.4, 60.9, 48.0.

<sup>8</sup> Procedure adapted from Sugiyama, H.; Yokokawa, F.; Shioiri, T. *Tetrahedron* **2003**, 59, 6579-6593.



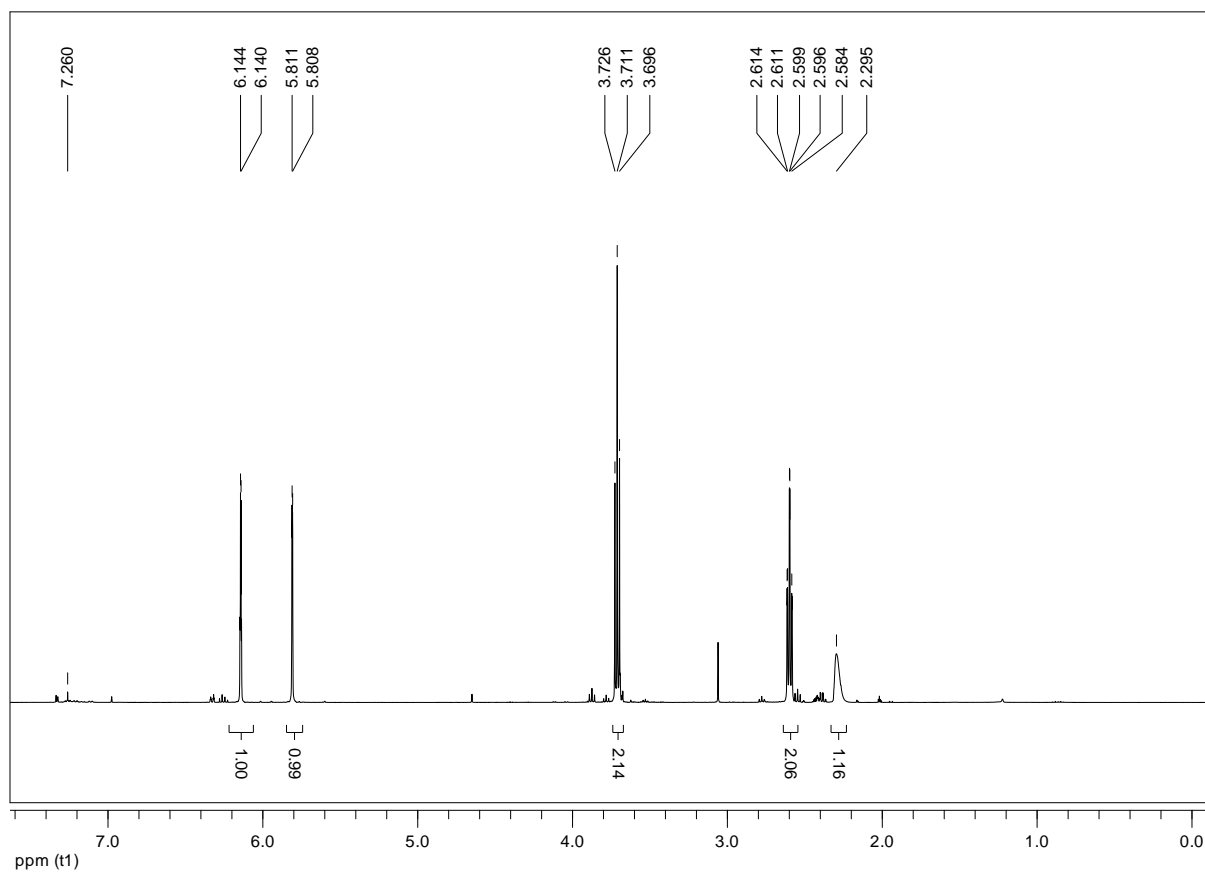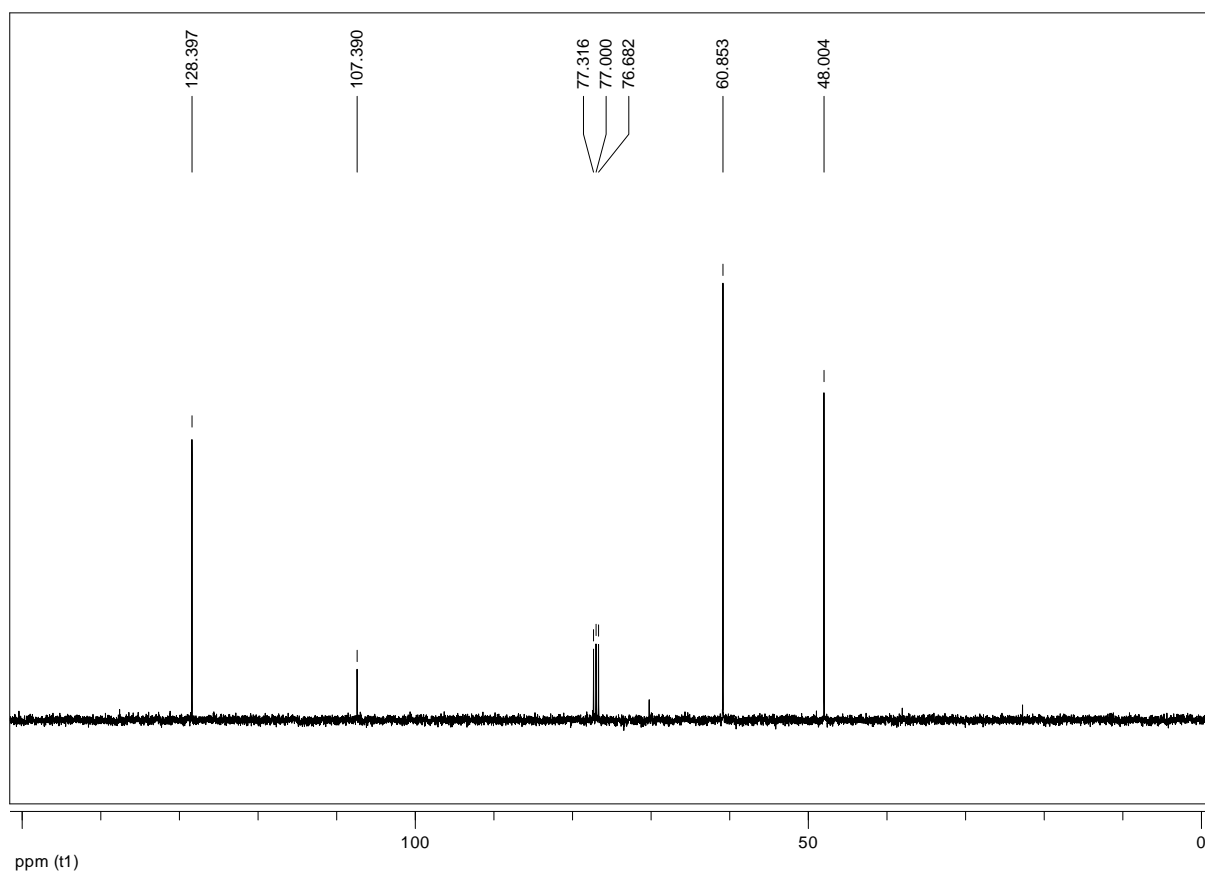

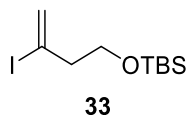

***tert*-Butyl((3-iodobut-3-en-1-yl)oxy)dimethylsilane (33):** To a stirring solution of **32** (652 mg, 3.29 mmol, 1.0 equiv) in DMF (5 mL) was added at rt imidazole (336 mg, 4.94 mmol, 1.5 equiv) followed by TBSCl (596 mg, 3.03 mmol, 1.2 equiv). After stirring for 1.5 h at rt, anhydrous methanol (0.5 mL) was added to the reaction mixture to facilitate removal of excess TBSCl. After stirring for 30 min at rt, the reaction mixture was diluted with Et<sub>2</sub>O (60 mL) and water (20 mL). The layers were separated and the aqueous layer was extracted once with Et<sub>2</sub>O (30 mL). The combined organic extracts were washed with brine (25 mL), dried over MgSO<sub>4</sub> and concentrated under reduced pressure. The residue was purified by column chromatography (hexane/ Et<sub>2</sub>O, 100:1 → hexane/ Et<sub>2</sub>O, 50:1) to give **33** (1.00 g, 98%) as a light purple oil.

**R<sub>f</sub>** = 0.56 (hexane/Et<sub>2</sub>O, 50:1)

**<sup>1</sup>H-NMR** (400.1 MHz, CDCl<sub>3</sub>): δ = 6.08 (m<sub>c</sub>, 1H), 5.76 (m<sub>c</sub>, 1H), 3.73 (t, *J* = 6.3 Hz, 2H), 2.59 (dt, *J* = 0.9, 6.3 Hz, 2H), 0.89 (s, 9H), 0.07 (s, 6H).

**<sup>13</sup>C-NMR** (100.6 MHz, CDCl<sub>3</sub>): δ = 127.4, 107.6, 61.7, 48.4, 25.9, 18.3, -5.2.

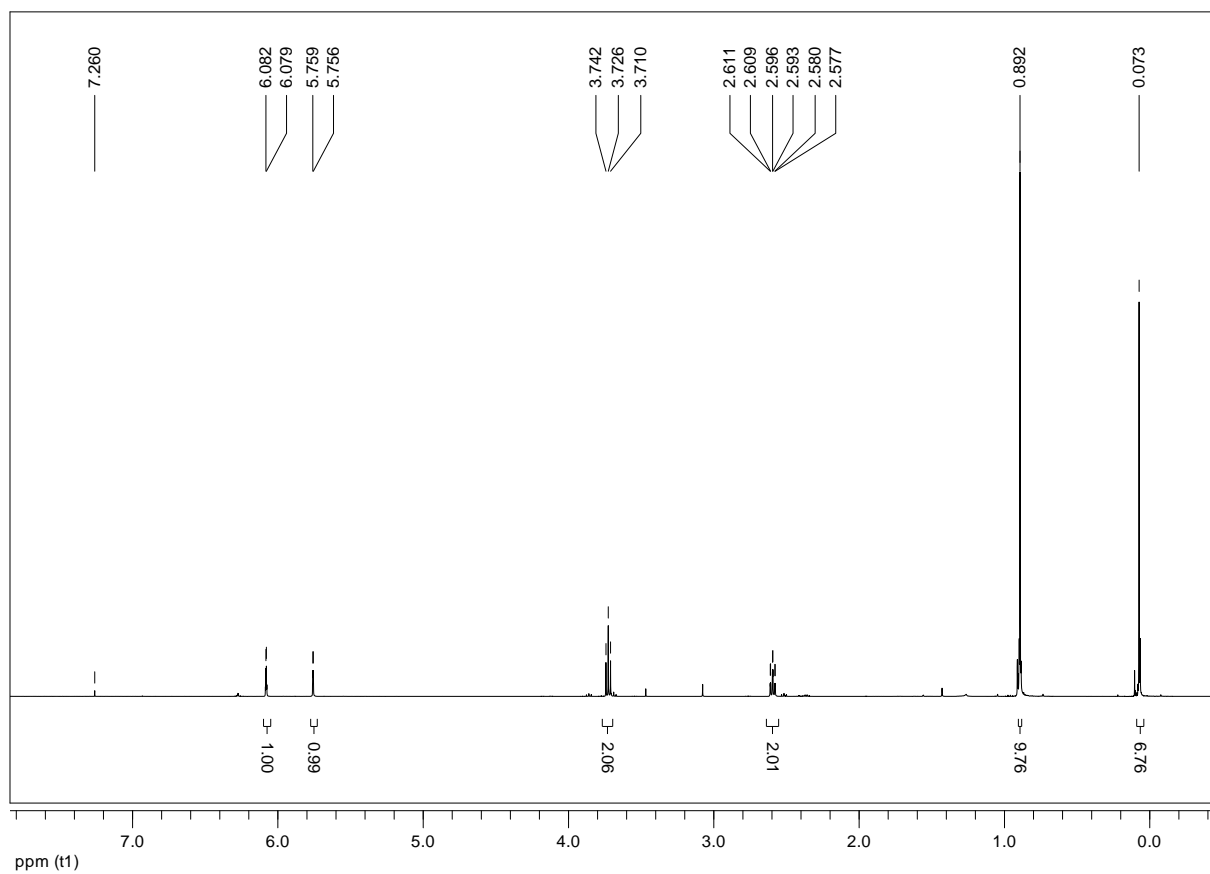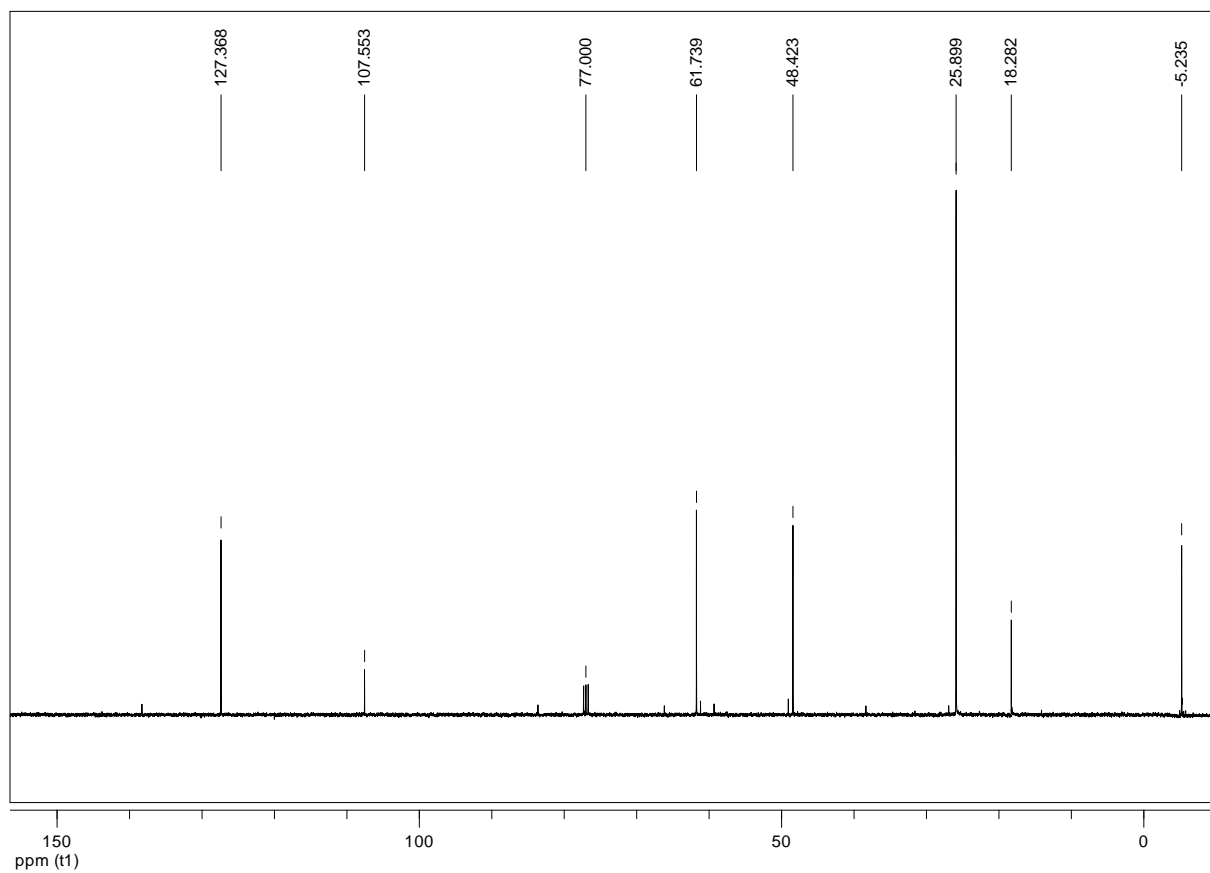

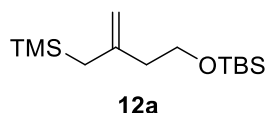

***tert*-Butyldimethyl((3-((trimethylsilyl)methyl)but-3-en-1-yl)oxy)silane (12a):** To a slurry of LiCl (37.4 mg, 0.88 mmol, 4.0 equiv) and Pd(PPh<sub>3</sub>)<sub>4</sub> (1.27 mg, 0.5 mol%) in Et<sub>2</sub>O (3.6 mL) was added a solution of **33** (68.9 mg, 0.22 mmol, 1.0 equiv) in Et<sub>2</sub>O (2.1 mL). After 10 min, (trimethylsilyl)methylmagnesium chloride (0.40 mL, 2.0 equiv, 1.1 M solution in Et<sub>2</sub>O)<sup>9</sup> was added at once. After stirring at rt for 1 h, the reaction mixture was quenched with sat. NaHCO<sub>3</sub> (10 mL) and was extracted with hexane/Et<sub>2</sub>O (1:1, 3 x 30 mL). The combined organic extracts were washed with brine, dried over MgSO<sub>4</sub> and concentrated under reduced pressure. The crude product was purified by column chromatography (hexane/Et<sub>2</sub>O, 0.5% NEt<sub>3</sub>, 100% → 400:1 → 200:1) to provide **12a** (55.7 mg, 93%) as a colorless oil.

**R<sub>f</sub>** = 0.78 (hexane/Et<sub>2</sub>O, 50:1)

**<sup>1</sup>H-NMR** (400.1 MHz, C<sub>6</sub>D<sub>6</sub>): δ = 4.75 (m<sub>c</sub>, 1H), 4.67 (m<sub>c</sub>, 1H), 3.74 (t, *J* = 6.9 Hz, 2H), 2.26 (dt, *J* = 0.9, 6.9 Hz, 2H), 1.53 (d, *J* = 0.9 Hz, 2H), 0.98 (s, 9H), 0.07 (s, 6H), 0.01 (s, 9H).

**<sup>13</sup>C-NMR** (100.6 MHz, C<sub>6</sub>D<sub>6</sub>): δ = 144.8, 108.9, 62.5, 42.0, 27.4, 26.1, 18.5, -1.3, -5.2.

<sup>9</sup> For the preparation of the *Grignard* reagent see procedure of **96**.

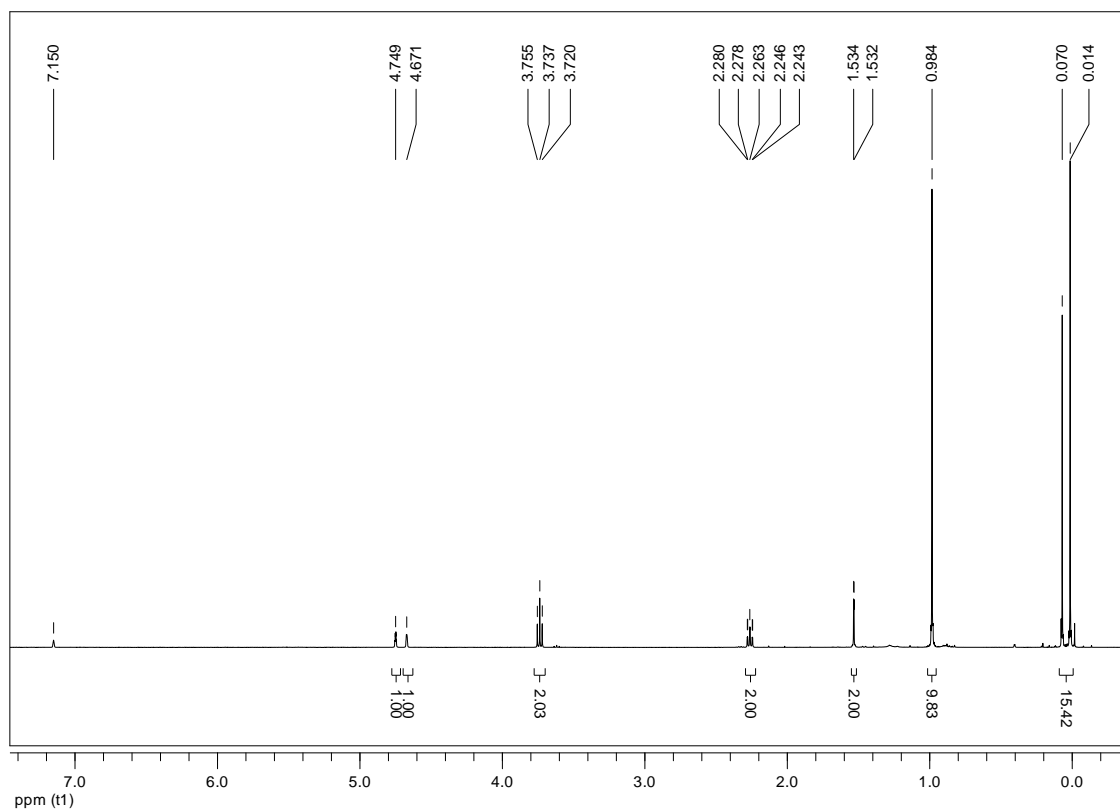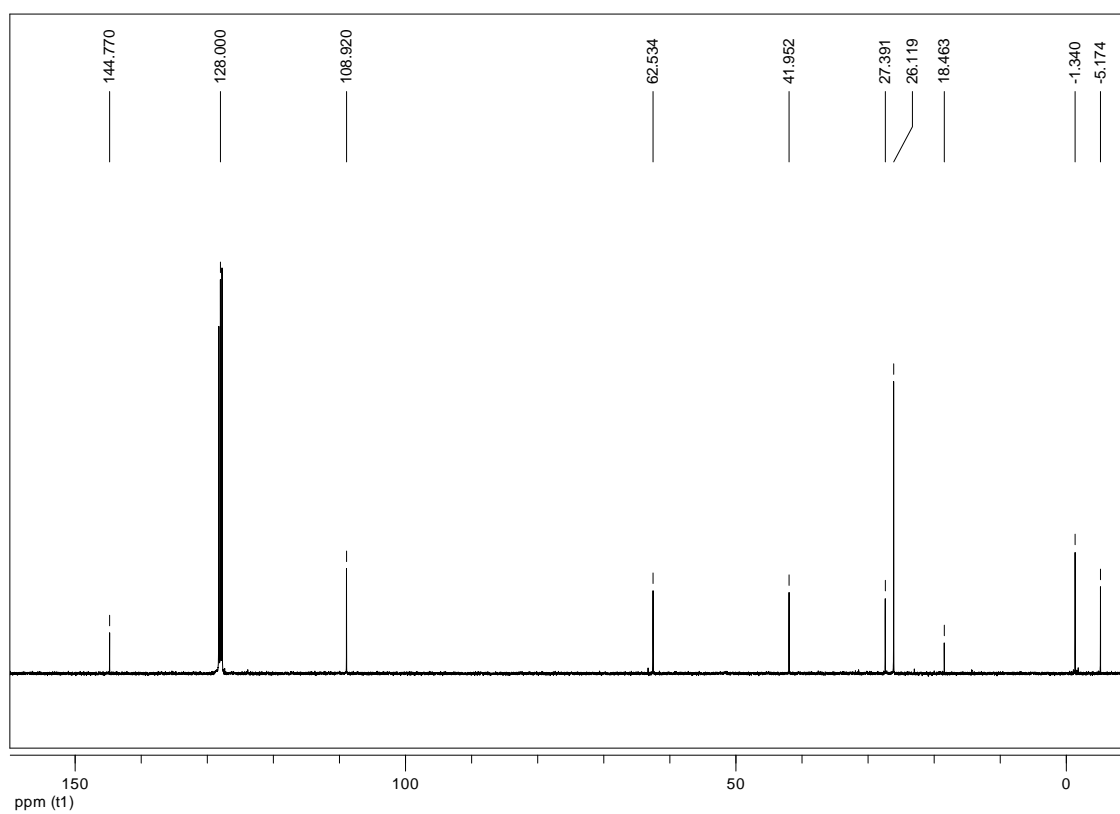

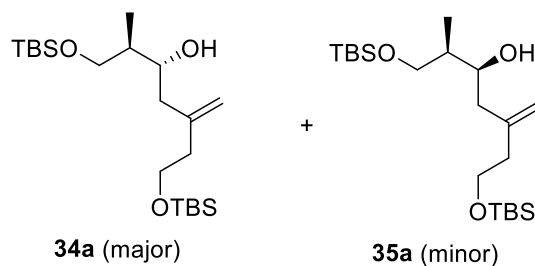

**(6R,7R)-2,2,3,3,6,13,13,14,14-Nonamethyl-9-methylene-4,12-dioxa-3,13-**

**disilapentadecan-7-ol (34a):** To a stirring suspension of **12a** (178 mg, 0.65 mmol, 2.1 equiv) and powdered 4 Å molecular sieves (20 mg) in CH<sub>2</sub>Cl<sub>2</sub> (1.8 mL) was added dropwise SnCl<sub>4</sub> (0.62 mL, 0.62 mmol, 2.0 equiv, 1.0 M solution in CH<sub>2</sub>Cl<sub>2</sub>) at -78 °C. After stirring for 15 min at that temperature, a solution of **11a** (62.7 mg, 0.31 mmol, 1.0 equiv) in CH<sub>2</sub>Cl<sub>2</sub> (2 mL) was added dropwise. After stirring for 3 h at -78 °C, the reaction mixture was quenched with sat. NaHCO<sub>3</sub> (5 mL). The layers were separated and the aqueous phase was extracted with CH<sub>2</sub>Cl<sub>2</sub> (3 x 15 mL). The combined organic extracts were washed with brine, dried over MgSO<sub>4</sub> and concentrated under reduced pressure. The crude product was purified by column chromatography (hexane/Et<sub>2</sub>O, 10:1 → 4:1 → 2:1) to provide an inseparable mixture of **34a/35a** (88.2 mg, 71% over 2 steps, *dr* 10:6.2) as a colorless oil. The analytical data are reported for the mixture of diastereoisomers.

$$R_f = 0.43 \text{ and } 0.38 \text{ (hexane/ Et}_2\text{O, 5:1)}$$

**<sup>1</sup>H-NMR** (400.1 MHz, CDCl<sub>3</sub>): δ = 4.94-4.83 (m, 2H), 4.00-3.58 (m, 5H), 3.26 (d, *J* = 3.1 Hz, OH minor), 2.83 (d, *J* = 2.7 Hz, OH major), 2.37-2.07 (m, 4H), 1.80-1.66 (m, 1H), 0.93 (d, *J* = 7.0 Hz, Me major), 0.91 (d, *J* = 5.4 Hz, Me minor), 0.90-0.87 (2s, 18H), 0.08-0.03 (2s, 6H).

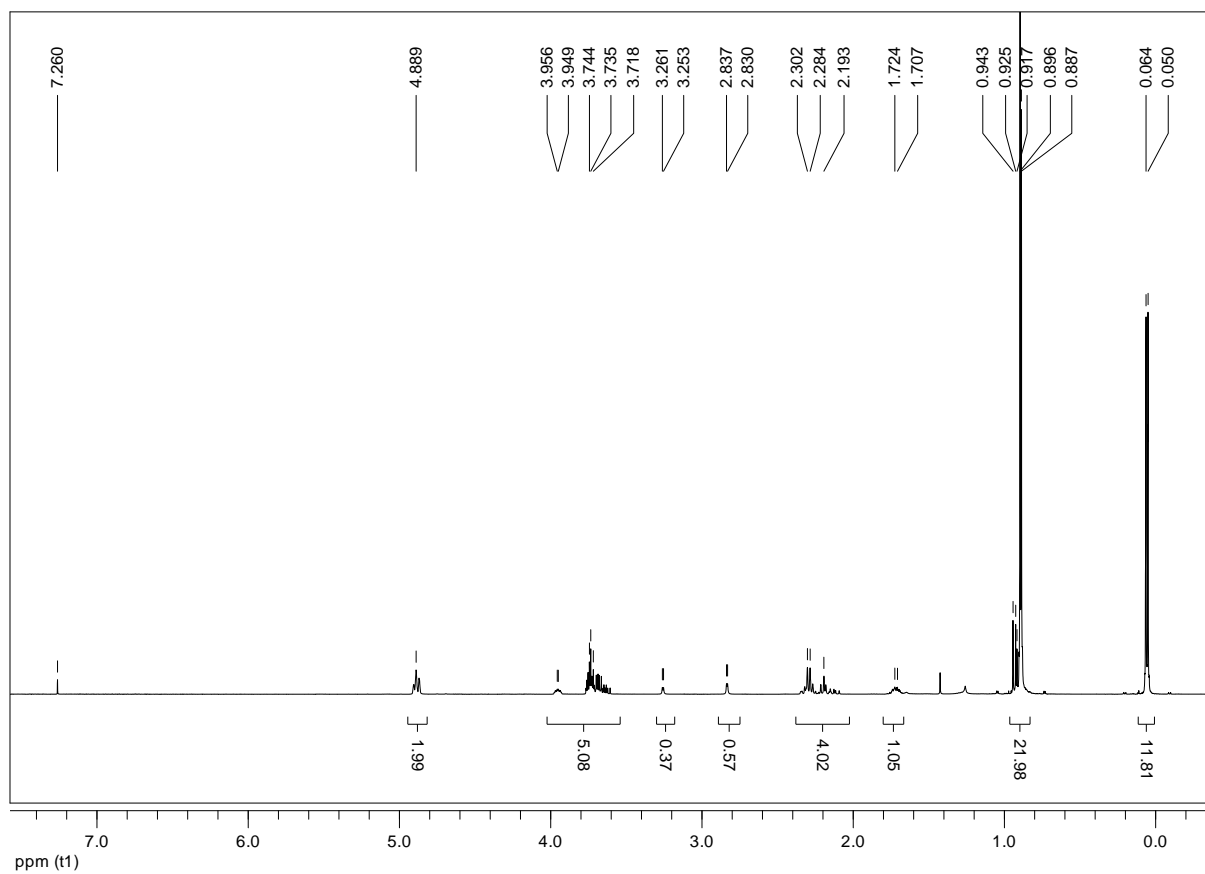

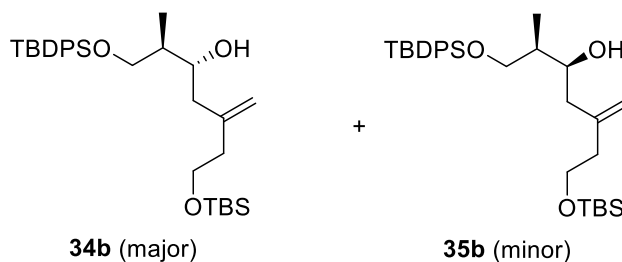

**(6*R*,7*R*)-2,2,6,13,13,14,14-Heptamethyl-9-methylene-3,3-diphenyl-4,12-dioxa-**

**3,13-disilapentadecan-7-ol (34b):** To a stirring solution of **11b** (103 mg, 0.32 mmol, 1.0 equiv) and **12a** (188 mg, 0.69 mmol, 2.2 equiv) in CH<sub>2</sub>Cl<sub>2</sub> (4 mL) was added dropwise at -78 °C TiCl<sub>4</sub> (0.35 mL, 0.35 mmol, 1.1 equiv, 1.0 M solution in CH<sub>2</sub>Cl<sub>2</sub>). After stirring for 1.5 h at -78 °C, the reaction mixture was quenched with sat. NaHCO<sub>3</sub> (15 mL). The layers were separated and the aqueous phase was extracted with CH<sub>2</sub>Cl<sub>2</sub> (3 x 25 mL). The combined organic extracts were washed with brine, dried over MgSO<sub>4</sub> and concentrated under reduced pressure. The crude product was purified by column chromatography (hexane/Et<sub>2</sub>O, 20:1 → 10:1 → 5:1) to provide an inseparable mixture of **34b/35b** (62.1 mg, 37% over 2 steps, *dr* 3:1.72) as a colorless oil. The analytical data are reported for the mixture of diastereoisomers.

$$R_f = 0.51 \text{ and } 0.45 \text{ (hexane/ Et}_2\text{O, 5:1)}$$

**<sup>1</sup>H-NMR** (400.1 MHz, CDCl<sub>3</sub>): δ = 7.75-7.62 (m, 4H), 7.49-7.35 (m, 6H), 4.95-4.85 (m, 2H), 4.03 (m<sub>c</sub>, 1H), 3.85-3.62 (m, 4H), 3.04 (d, *J* = 3.1 Hz, OH minor), 2.61 (d, *J* = 3.1 Hz, OH major), 2.40-2.07 (m, 4H), 1.86-1.70 (m, 1H), 1.07 (s, 9H), 0.97-0.92 (2d, 3H), 0.90 (s, 9H), 0.06 (s, 6H).



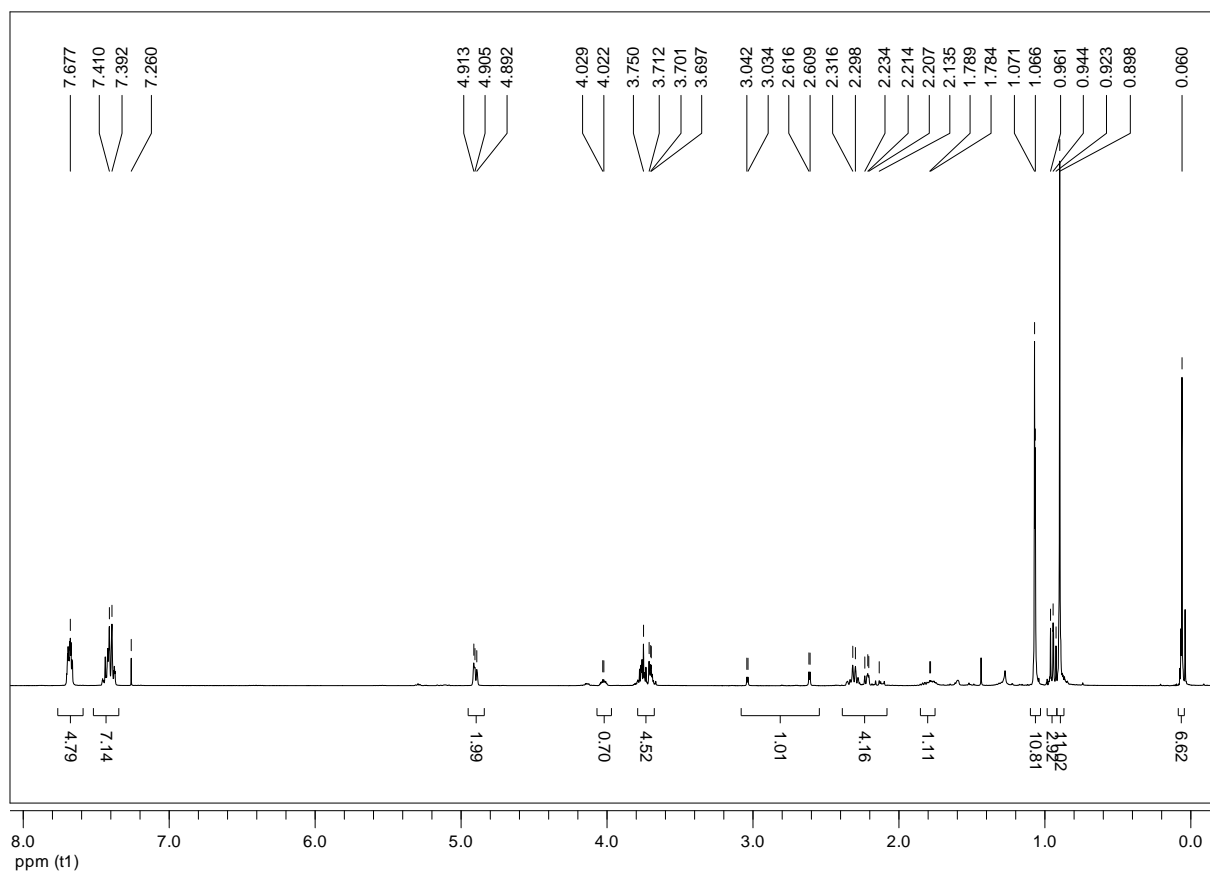

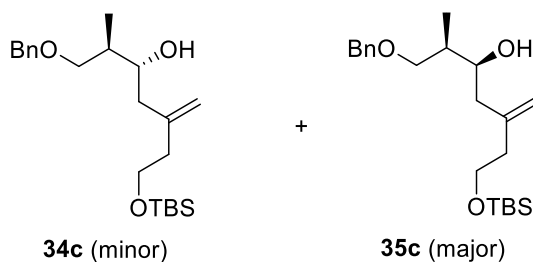

**(2R,3S)-1-(Benzyloxy)-7-(*tert*-butyldimethylsilyloxy)-2-methyl-5-**

**methyleneheptan-3-ol (35c):** To a stirring solution of **11c** (26.2 mg, 0.15 mmol, 1.0 equiv) and **12a** (105 mg, 0.39 mmol, 2.6 equiv) in CH<sub>2</sub>Cl<sub>2</sub> (1.7 mL) was added at -78 °C TiCl<sub>4</sub> (0.20 mL, 0.20 mmol, 1.4 equiv, 1.0 M solution in CH<sub>2</sub>Cl<sub>2</sub>). After stirring for 1.5 h at -78 °C, the reaction mixture was quenched with sat. NaHCO<sub>3</sub> (5 mL) and extracted with CH<sub>2</sub>Cl<sub>2</sub> (3 x 15 mL). The combined organic extracts were washed with brine, dried over MgSO<sub>4</sub> and concentrated under reduced pressure. The crude product was purified by column chromatography (hexane/Et<sub>2</sub>O, 10:1 → 4:1 → 2:1) to provide an inseparable mixture of **35c/34c** (27.7 mg, 50% over 2 steps, *dr* 10:3) as a colorless oil. The analytical data are reported for the major isomer **35c**:

**R<sub>f</sub>** = 0.26 (hexane/ Et<sub>2</sub>O, 5:1)

**<sup>1</sup>H-NMR** (400.1 MHz, CDCl<sub>3</sub>): δ = 7.39-7.25 (m, 5H), 4.90 (s, 2H), 4.52 (s, 2H), 3.74 (t, *J* = 6.8 Hz, 2H), 3.72-3.65 (m, 1H), 3.55 (dd, *J* = 2.1, 5.7 Hz, 2H), 2.36-2.25 (m, 3H), 2.10 (dd, *J* = 9.8, 13.9 Hz, 1H), 1.89 (m<sub>c</sub>, 1H), 0.97 (d, *J* = 6.9 Hz, 3H), 0.89 (s, 9H), 0.05 (s, 6H).

**<sup>13</sup>C-NMR** (100.6 MHz, CDCl<sub>3</sub>): δ = 144.3, 138.2, 128.4, 127.6, 113.8, 73.8, 73.3, 72.4, 62.4, 42.2, 38.9, 38.7, 25.9, 18.3, 14.0, -5.3.

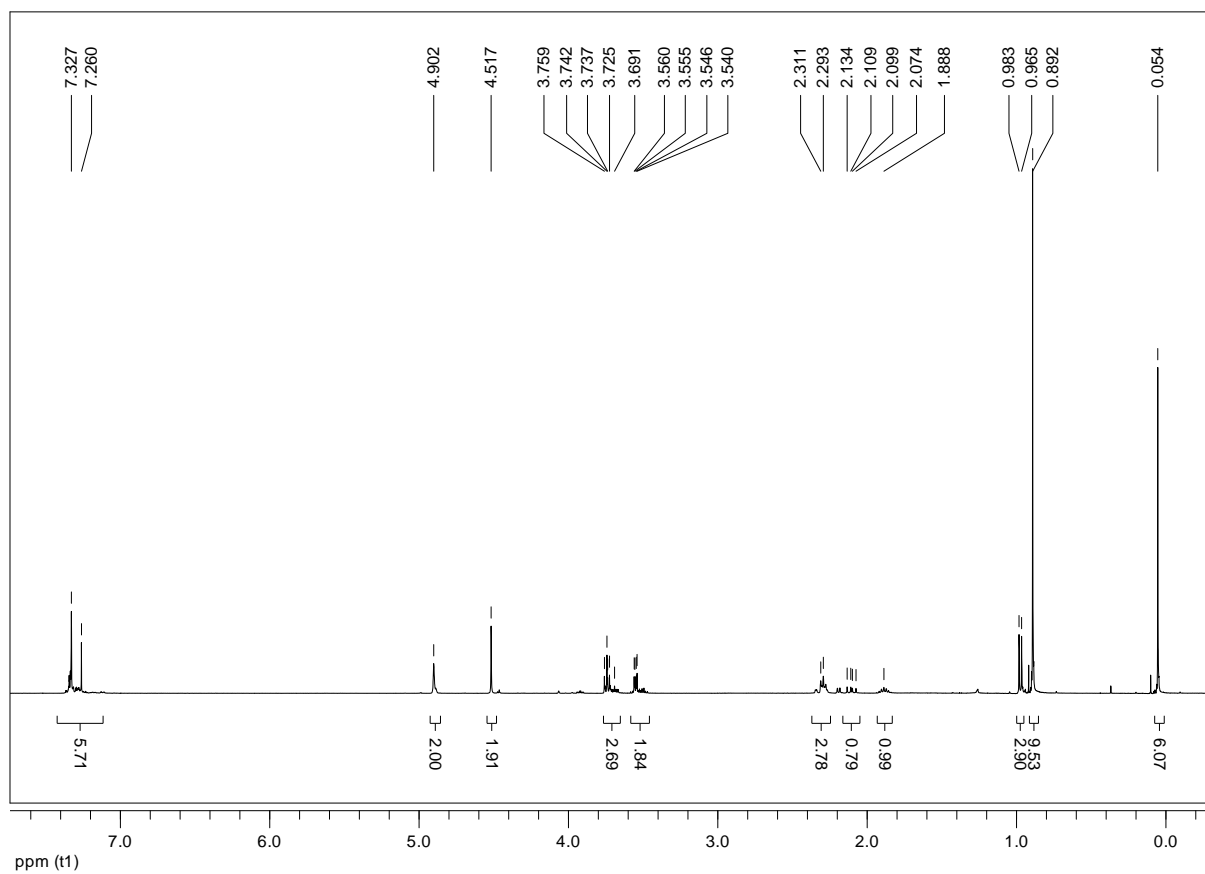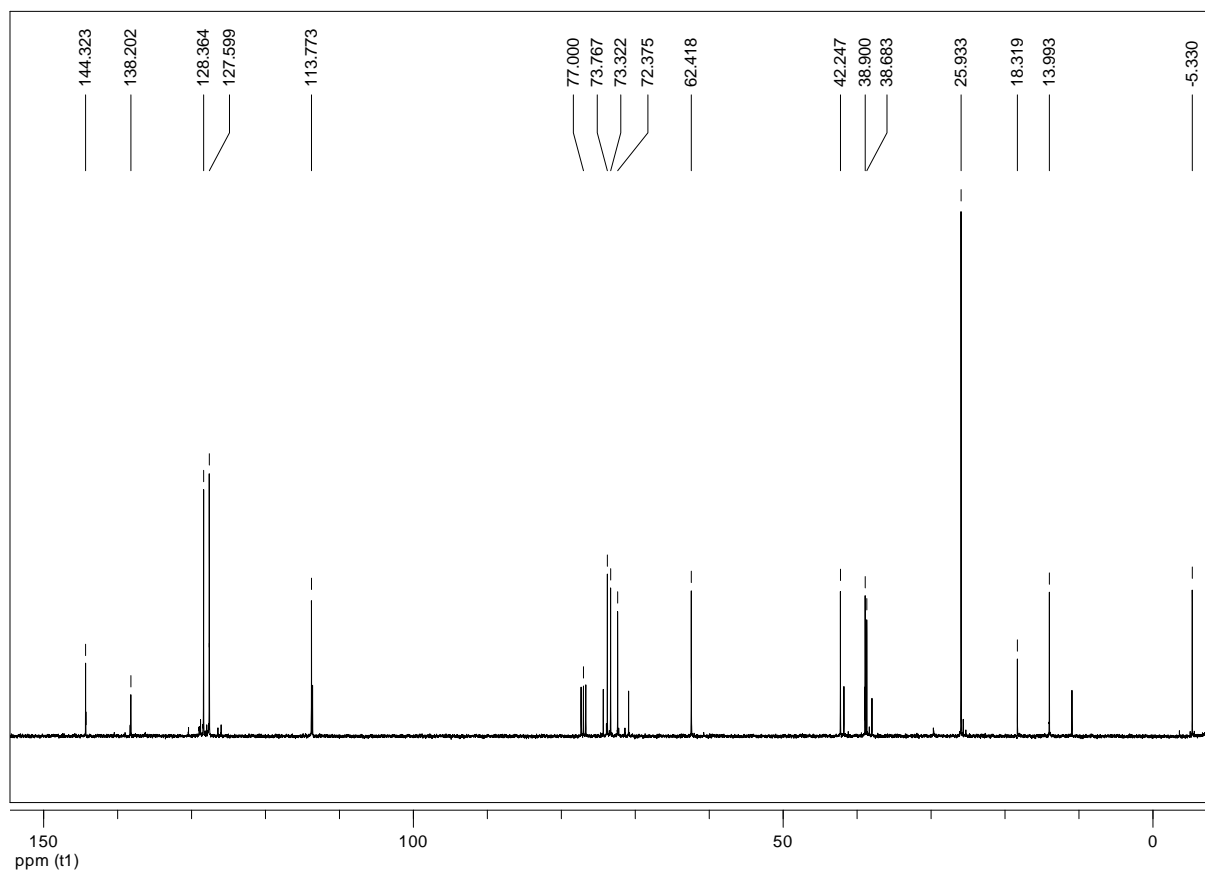

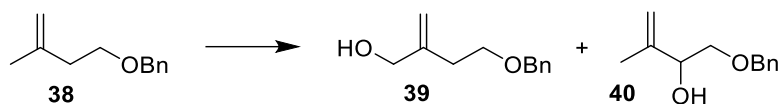

**4-(Benzyloxy)-2-methylenebutan-1-ol (39) and 1-(benzyloxy)-3-methylbut-3-en-2-ol (40):** To a solution of **38**<sup>10</sup> (252 mg, 1.43 mmol, 1.0 equiv) in CH<sub>2</sub>Cl<sub>2</sub> (7 mL) was added *t*-BuOOH (0.29 mL, 1.45 mmol, 1.0 equiv, 5.0 M in decane) and SeO<sub>2</sub> (16.9 mg, 0.15 mmol, 10 mol%). After stirring for 2 h at rt, MeOH (7 mL) and NaBH<sub>4</sub> (210 mg, 5.55 mmol, 3.9 equiv) were added to the reaction mixture at 0 °C and stirring was continued for 30 min at that temperature. Sat. NH<sub>4</sub>Cl (25 mL) was added and the aqueous layer was extracted with CH<sub>2</sub>Cl<sub>2</sub> (3 x 30 mL). The combined organic extracts were washed with brine, dried over MgSO<sub>4</sub> and concentrated under reduced pressure. The residue was purified by column chromatography (hexane/Et<sub>2</sub>O, 6:1  $\rightarrow$  4:1  $\rightarrow$  2:1  $\rightarrow$  1:1) to provide **39** (64.5 mg, 23%, 38% brsm) as a yellow oil.<sup>11</sup> Furthermore, secondary alcohol **40** (76.6 mg, 28%) and starting material **38** (97.3 mg, 39%) were isolated. The analytical data for **39** matched those reported below.

Analytical data for **40**:

**R<sub>f</sub>** = 0.30 (hexane/Et<sub>2</sub>O, 2:1)

**<sup>1</sup>H-NMR** (400.1 MHz, CDCl<sub>3</sub>):  $\delta$  = 7.40-7.27 (m, 5H), 5.07 (mc, 1H), 4.93 (mc, 1H), 4.58 (s, 2H), 4.29 (dd, *J* = 2.0, 7.8 Hz, 1H), 3.59 (dd, *J* = 3.3, 9.6 Hz, 1H), 3.43 (dd, *J* = 8.1, 9.6 Hz, 1H), 2.54 (brs, 1H), 1.74 (s, 3H).

**<sup>13</sup>C-NMR** (100.6 MHz, CDCl<sub>3</sub>):  $\delta$  = 143.8, 137.8, 128.4, 127.8, 127.7, 112.0, 73.3 (2C), 18.7.

<sup>10</sup> Benzyl ether **38** was prepared according to a literature procedure: Cleary, P. A.; Woerpel, K. A. *Org. Lett.* **2005**, 7, 5531-5533.

<sup>11</sup> Procedure adapted from: Smith, A. B. *et al. Tetrahedron* **2009**, 65, 6489-6509.

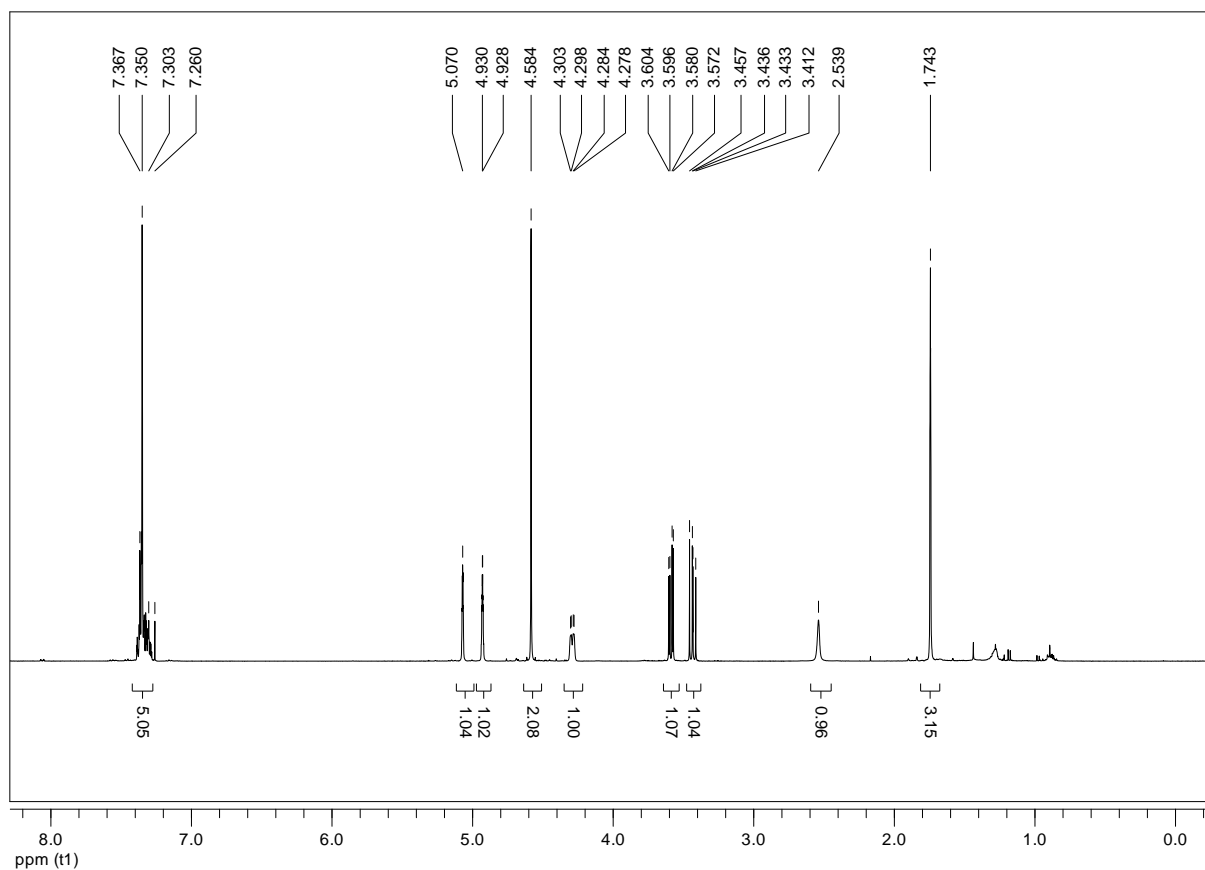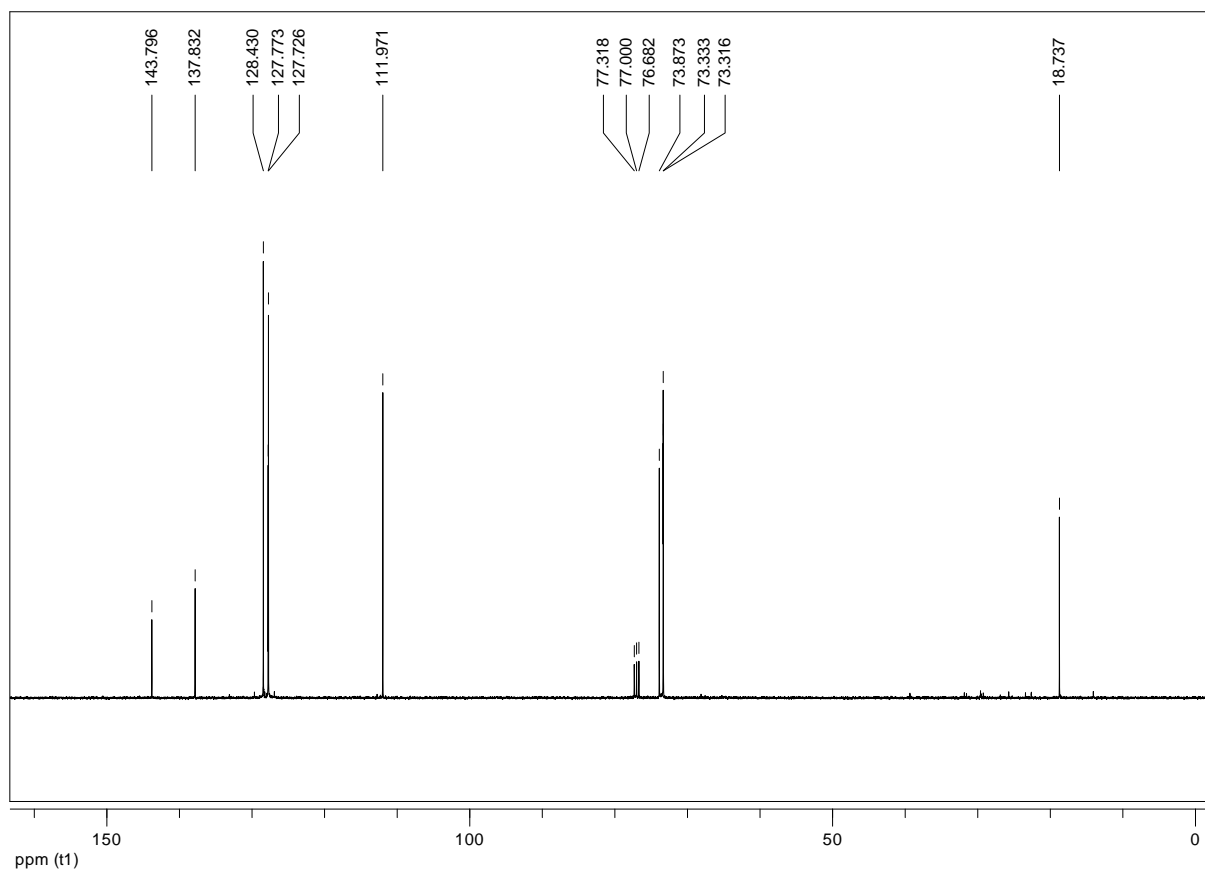

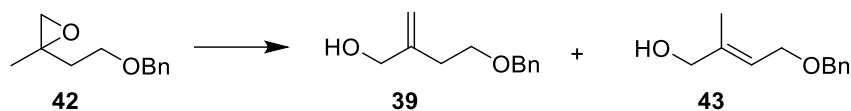

**4-(Benzyloxy)-2-methylenecyclohexanol (39) and (E)-4-(benzyloxy)-2-methylcyclohex-2-en-1-ol (43):** To a stirred solution of 2,2,6,6-tetramethylpiperidine (0.59 mL, 3.51 mmol, 2.25 equiv) in toluene (9.5 mL) was added at 0 °C *n*-BuLi (2.15 mL, 3.43 mmol, 2.20 equiv, 1.6 M in hexane) and stirring was continued for 30 min at that temperature. Then, Et<sub>2</sub>AlCl (3.43 mL, 3.43 mmol, 2.20 equiv, 1.0 M in hexane) was added. After stirring for 30 min at 0 °C, a solution of **42**<sup>12</sup> (300 mg, 1.56 mmol, 1.00 equiv) in toluene (2.4 mL) was added slowly *via* syringe down the side of the flask. After 3 h at 0 °C, 2 M HCl (10 mL), water (50 mL) and Et<sub>2</sub>O (100 mL) were added. The reaction mixture was extracted with Et<sub>2</sub>O (5 x 60 mL) and the combined organic extracts were washed with brine, dried over MgSO<sub>4</sub> and concentrated under reduced pressure. The residue was purified by column chromatography (hexane/Et<sub>2</sub>O, 10:1 → 5:1 → 2:1 → 1:1 → 0:1) to provide the desired alcohol **39** (144 mg, 48%) and the regioisomers **43** (46.9 mg, 16%). The analytical data for **39** matched those reported below.

Analytical data for **43**:

**R<sub>f</sub>** = 0.39 (hexane/ EtOAc, 2:1)

**<sup>1</sup>H-NMR** (400.1 MHz, CDCl<sub>3</sub>): δ = 7.38-7.26 (m, 5H), 5.66 (mc, 1H), 4.52 (s, 2H), 4.08 (d, *J* = 6.6 Hz, 2H), 4.00 (s, 2H), 2.10 (brs, 1H), 1.66 (s, 3H).

**<sup>13</sup>C-NMR** (100.6 MHz, CDCl<sub>3</sub>): δ = 139.3, 138.2, 128.3, 127.7, 127.6, 121.2, 72.3, 67.8, 66.1, 13.8.

<sup>12</sup> Epoxide **42** was prepared according to a literature procedure: Muehlbacher, M.; Poulter, C. D. *J. Org. Chem.* **1988**, 53, 1026-1030.

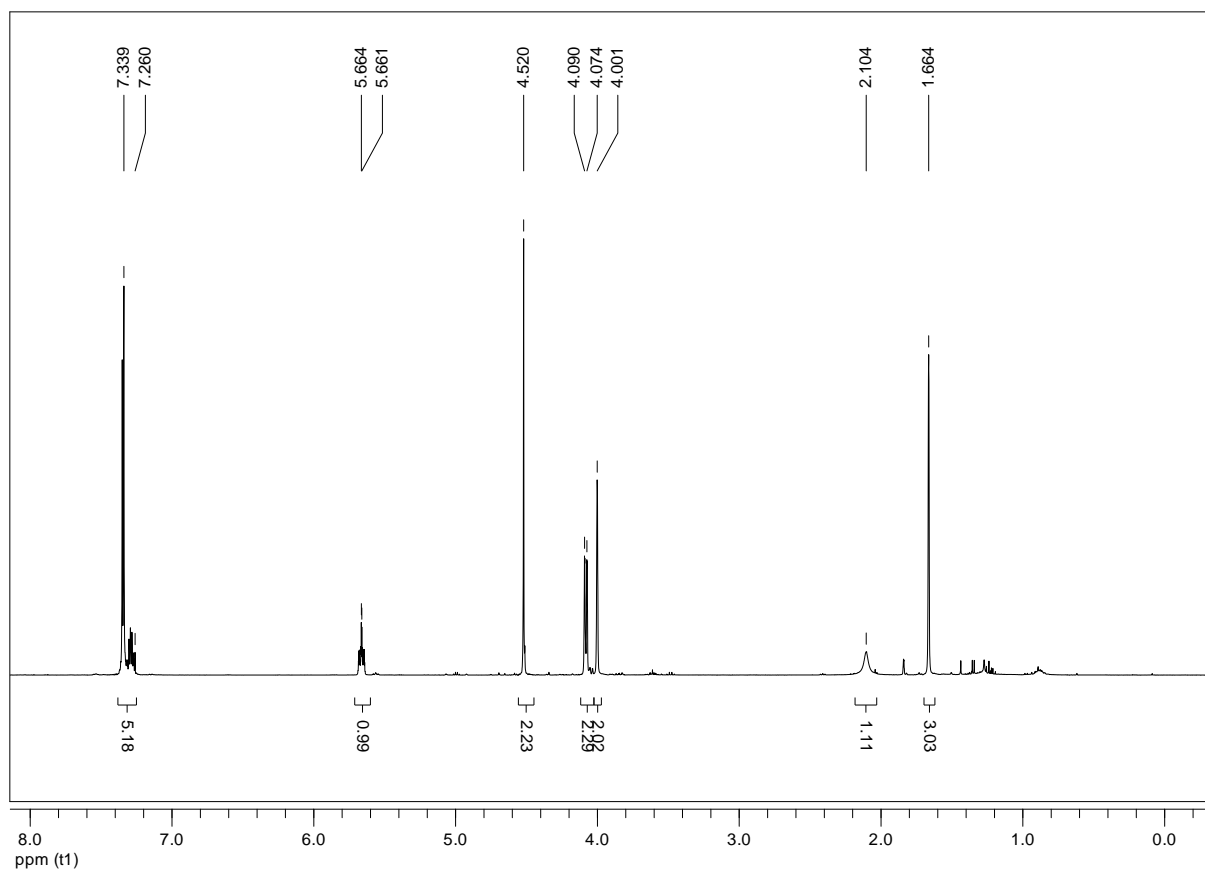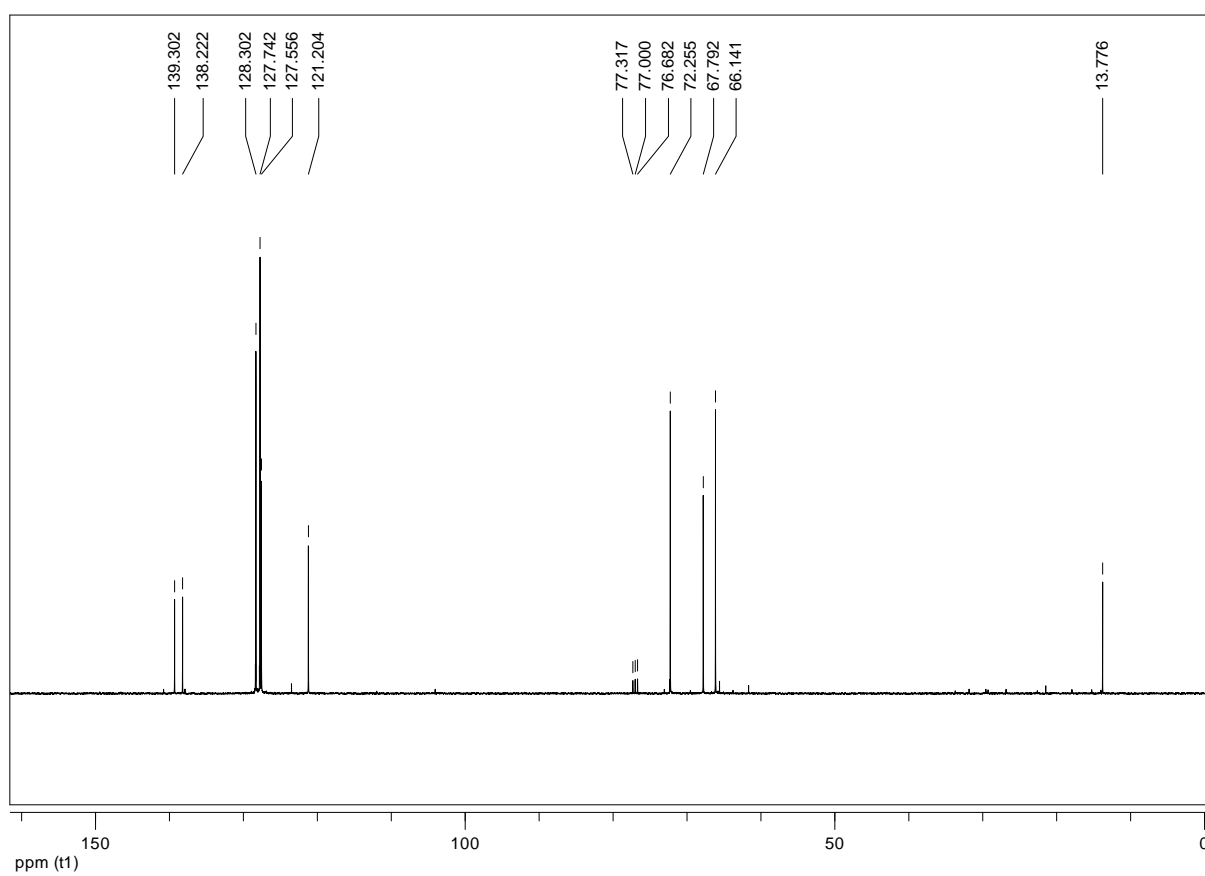

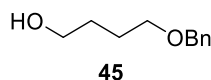

**4-(Benzyloxy)butan-1-ol (45):** To a vigorously stirring suspension of NaH (4.44 g, 111 mmol, 1.2 equiv, 60% dispersion in mineral oil) in THF (151 mL) was added at 0 °C quickly a solution of 1,4-butanediol (**44**) (41 mL, 463 mmol, 5.0 equiv) in THF (61 mL) *via* an addition funnel. After stirring for 50 min at rt, the reaction mixture was again cooled to 0 °C and BnBr (11.0 mL, 92.5 mmol, 1.0 equiv) was added dropwise *via* syringe. After stirring for 14 h at rt, the reaction was quenched with sat. NH<sub>4</sub>Cl (80 mL) and water (50 mL). The layers were separated and the aqueous phase was extracted with Et<sub>2</sub>O (2 x 80 mL). The combined organic extracts were dried over MgSO<sub>4</sub> and concentrated under reduced pressure. The residue was purified by column chromatography (hexane/EtOAc, 2:1 → 1:1) to afford **45** (16.2 g, 97%) as a colorless oil.<sup>13</sup>

**R<sub>f</sub>** = 0.28 (hexane/EtOAc, 2:1)

**<sup>1</sup>H-NMR** (400.1 MHz, CDCl<sub>3</sub>): δ = 7.40-7.26 (m, 5H), 4.52 (s, 2H), 3.65 (t, *J* = 5.9 Hz, 2H), 3.52 (t, *J* = 5.8 Hz, 2H), 2.04 (bs, 1H), 1.74-1.66 (m<sub>c</sub>, 4H).

**<sup>13</sup>C-NMR** (100.6 MHz, CDCl<sub>3</sub>): δ = 138.2, 128.4, 127.7, 127.6, 73.0, 70.3, 62.7, 30.1, 26.7.

**IR** (neat, v/cm<sup>-1</sup>): 3372br, 2938w, 2861m, 1496w, 1453m, 1362m, 1205w, 1096m, 1059s, 1028m, 957w, 734s, 697s, 611m.

**HRMS (EI):** *m/z* calcd for C<sub>11</sub>H<sub>16</sub>O<sub>2</sub> [M]<sup>+</sup>: 180.1145, found: 180.1142.

<sup>13</sup> Crimmins, M. T.; DeBaillie, A. C. *J. Am. Chem. Soc.* **2006**, *128*, 4936-4937.



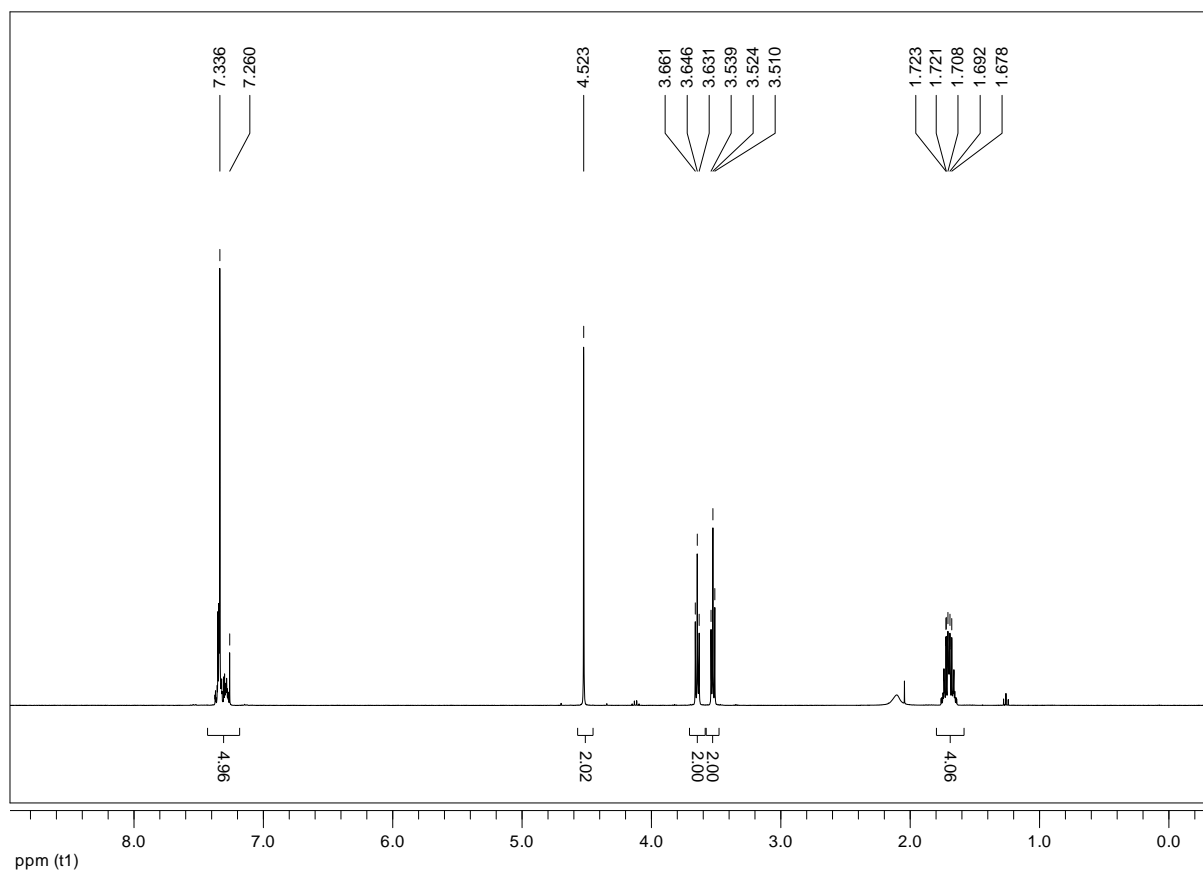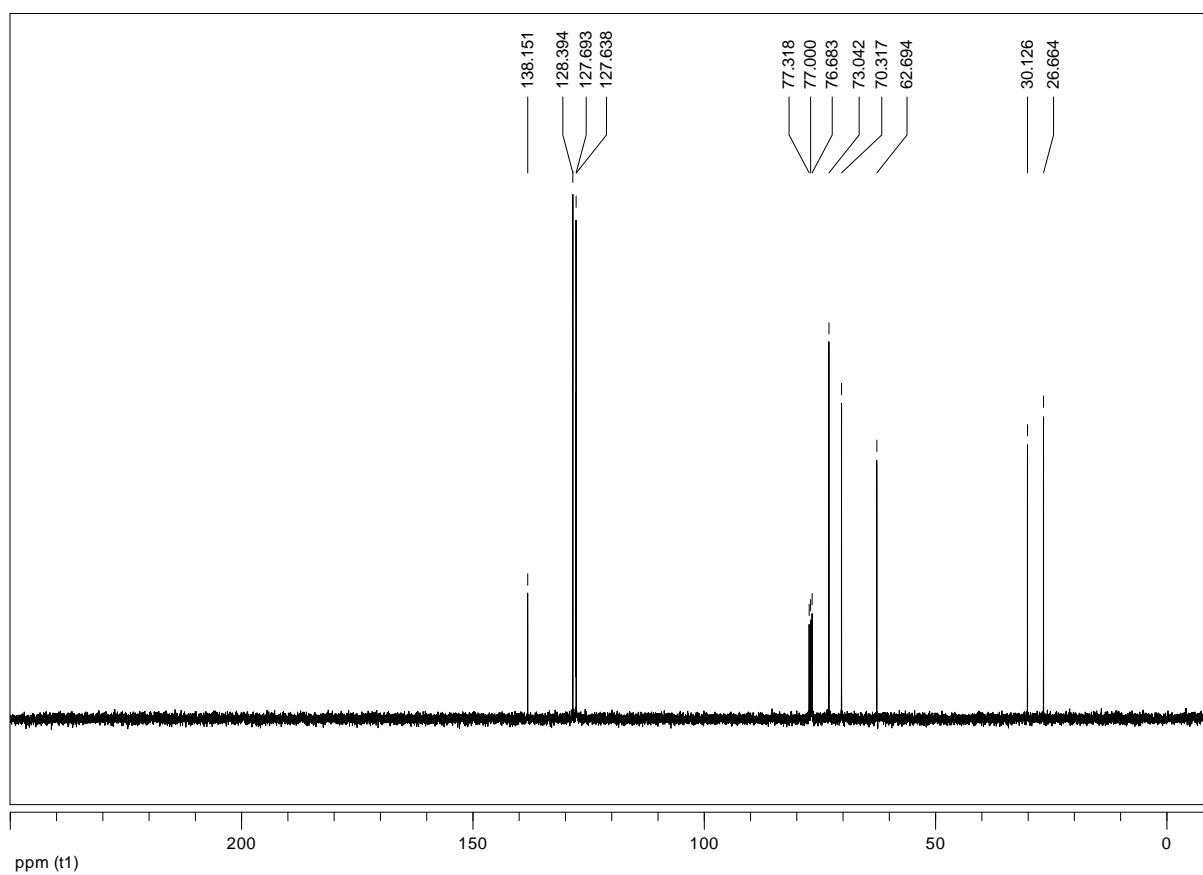

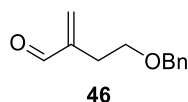

**4-(Benzyloxy)-2-methylenebutanal (46):** To a solution of oxalyl chloride (2.76 mL, 32.6 mmol, 1.5 equiv) in CH<sub>2</sub>Cl<sub>2</sub> (157 mL) was added dropwise at –78 °C DMSO (4.64 mL, 65.3 mmol, 3.0 equiv). After stirring for 20 min at that temperature, a solution of **45** (3.92 g, 21.8 mmol, 1.0 equiv) in CH<sub>2</sub>Cl<sub>2</sub> (42 mL + 10 mL of washing) was added dropwise over 20 min, and the mixture was stirred at –78 °C for 1 h. Triethylamine (15.2 mL, 109 mmol, 5.0 equiv) was added, and the resulting mixture was stirred at 0 °C for 30 min. CH<sub>2</sub>NMe<sub>2</sub>Cl (4.07 g, 43.5 mmol, 2.0 equiv) and DBU (3.25 mL, 21.8 mmol, 1.0 equiv) were then added; the mixture was stirred at rt for 22 h, the reaction was quenched with sat. NH<sub>4</sub>Cl (150 mL), and the resulting mixture was extracted with CH<sub>2</sub>Cl<sub>2</sub> (2 x 300 mL). The combined organic extracts were dried over MgSO<sub>4</sub> and concentrated under reduced pressure. The residue was purified by column chromatography (hexane/EtOAc, 30:1 → 10:1) to provide **46** (3.56 g, 86% over 2 steps) as a colorless oil.

**R<sub>f</sub>** = 0.33 (hexane/EtOAc, 10:1)

**<sup>1</sup>H-NMR** (400.1 MHz, CDCl<sub>3</sub>): δ = 9.54 (s, 1H), 7.39-7.24 (m, 5H), 6.39 (dd, *J* = 0.8, 2.0 Hz, 1H), 6.08 (d, *J* = 0.5 Hz, 1H), 4.51 (s, 2H), 3.60 (t, *J* = 6.4 Hz, 2H), 2.58 (dt, *J* = 0.7, 6.4 Hz, 2H).

**<sup>13</sup>C-NMR** (100.6 MHz, CDCl<sub>3</sub>): δ = 194.4, 147.0, 138.2, 135.6, 128.4, 127.6, 72.8, 67.9, 28.3.

**IR** (neat, ν/cm<sup>-1</sup>): 3088w, 3063w, 3031w, 2925w, 2858w, 1686s, 1496w, 1454m, 1361m, 1101s, 1029w, 948m, 737s, 698s..

**HRMS (EI):** *m/z* calcd for C<sub>12</sub>H<sub>14</sub>O<sub>2</sub> [M]<sup>+</sup>: 190.0989, found: 190.0991.

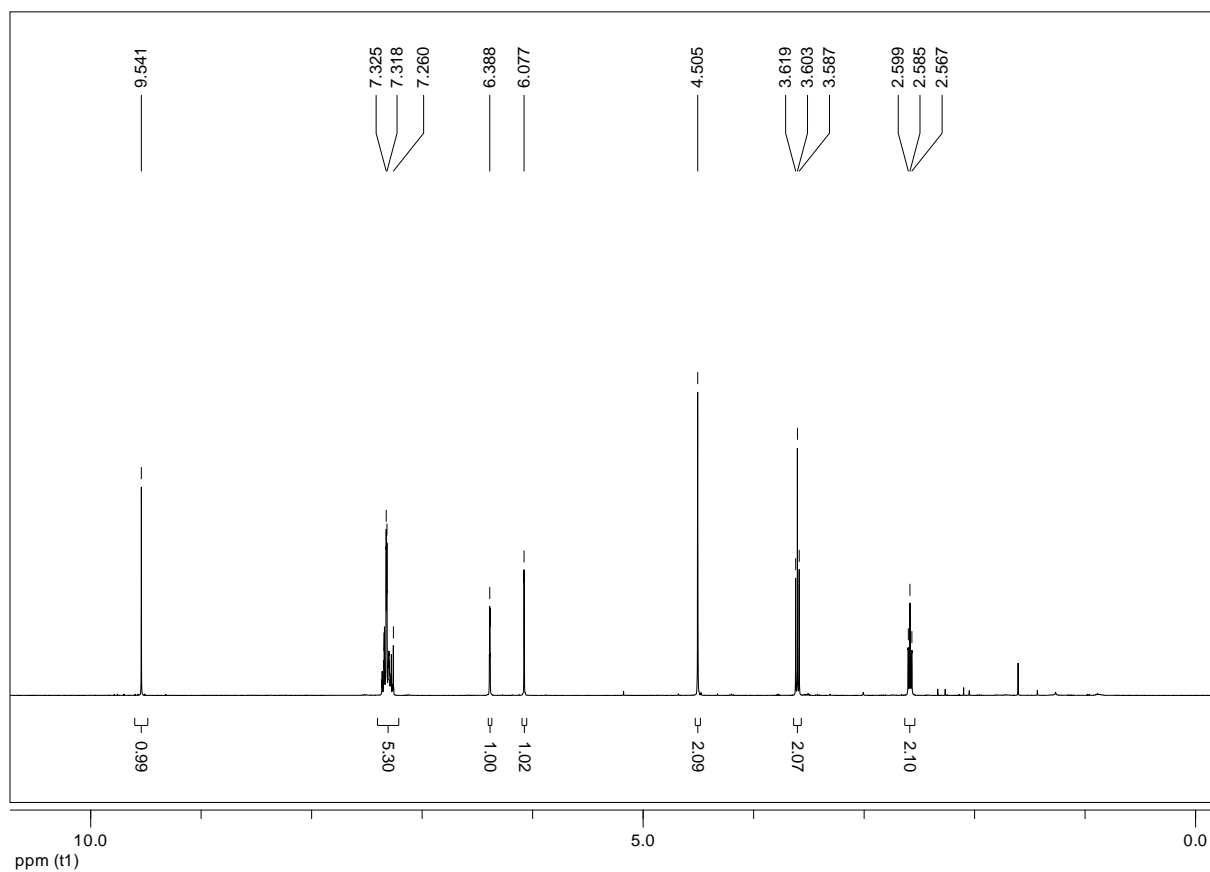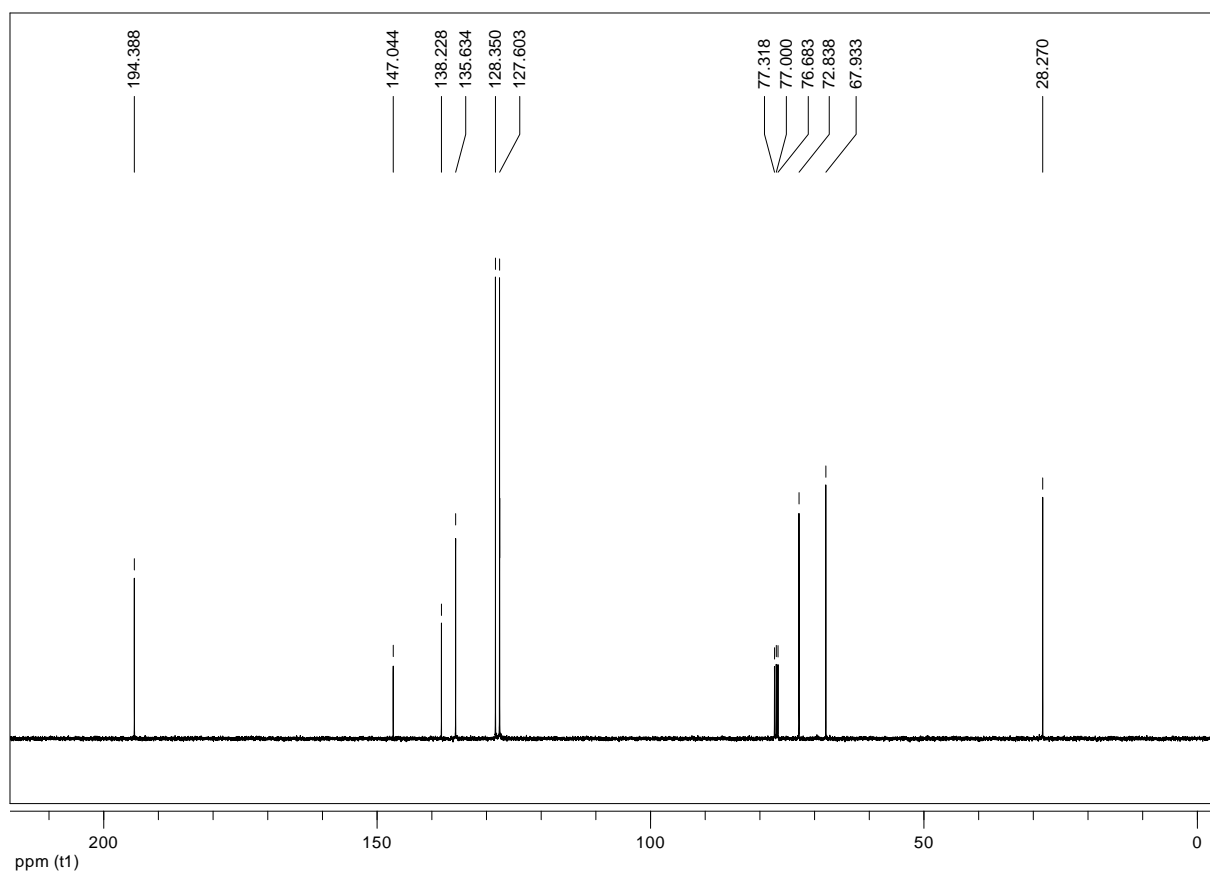

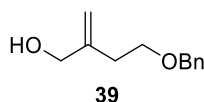

**NaBH<sub>4</sub> reduction:** A solution of **46** (3.55 g, 18.7 mmol, 1.0 equiv) in EtOH (40 mL) was added over 20 min to a stirred suspension of NaBH<sub>4</sub> (367 mg, 9.70 mmol, 0.52 equiv) in EtOH (100 mL) at 0 °C. After stirring at 0 °C for 40 min, brine (70 mL) and water (40 mL) were added, and the mixture was extracted with EtOAc (2 x 350 mL). The combined organic extracts were washed with brine (80 mL), dried over MgSO<sub>4</sub> and concentrated under reduced pressure. The residue was purified by column chromatography (hexane/EtOAc, 4:1 → 2:1) to provide **39** (3.38 g, 94%) as a colorless oil.

**LiAlH<sub>4</sub> reduction:** To a solution of **46** (12.7 g, 66.8 mmol, 1.0 equiv) in THF (600 mL) was added at 0 °C LiAlH<sub>4</sub> (1.32 g, 38.0 mmol, 0.52 equiv) in small portions over 5 min. After stirring at 0 °C for 30 min, water (16 mL) was added dropwise at 0 °C to the reaction mixture followed by 10% NaOH (25 mL) and water (150 mL). The colorless precipitate was filtered off and washed with THF. The mother liquor was transferred to a separatory funnel and diluted with Et<sub>2</sub>O (150 mL) and (80 mL). The layers were separated and the aqueous layer was extracted with Et<sub>2</sub>O (2 x 100 mL). The combined organic extracts were dried over MgSO<sub>4</sub> and concentrated under reduced pressure. The residue was purified by column chromatography (hexane/EtOAc, 4:1 → 2:1) to provide **39** (12.3 g, 96%) as a colorless oil.

**R<sub>f</sub>** = 0.47 (hexane/ EtOAc, 2:1)

**<sup>1</sup>H-NMR** (400.1 MHz, CDCl<sub>3</sub>): δ = 7.39-7.26 (m, 5H), 5.07 (d, *J* = 1.4 Hz, 1H), 4.93 (s, 1H), 4.54 (s, 2H), 4.08 (s, 2H), 3.62 (t, *J* = 6.2 Hz, 2H), 2.42 (dt, *J* = 0.6, 6.2 Hz, 2H), 2.32 (brs, 1H).

**<sup>13</sup>C-NMR** (100.6 MHz, CDCl<sub>3</sub>): δ = 146.8, 137.9, 128.4, 127.7 (2C), 112.2, 73.2, 69.7, 66.3, 33.9.

**IR** (neat, ν/cm<sup>-1</sup>): 3384br, 3087w, 3065w, 3031w, 2911w, 2860m, 1454m, 1362m, 1206w, 1099s, 1074s, 1028s, 901m, 738s, 698s, 615w.

**HRMS (EI):** *m/z* calcd for C<sub>12</sub>H<sub>16</sub>O<sub>2</sub> [M]<sup>+</sup>: 192.1145, found: 192.1139.

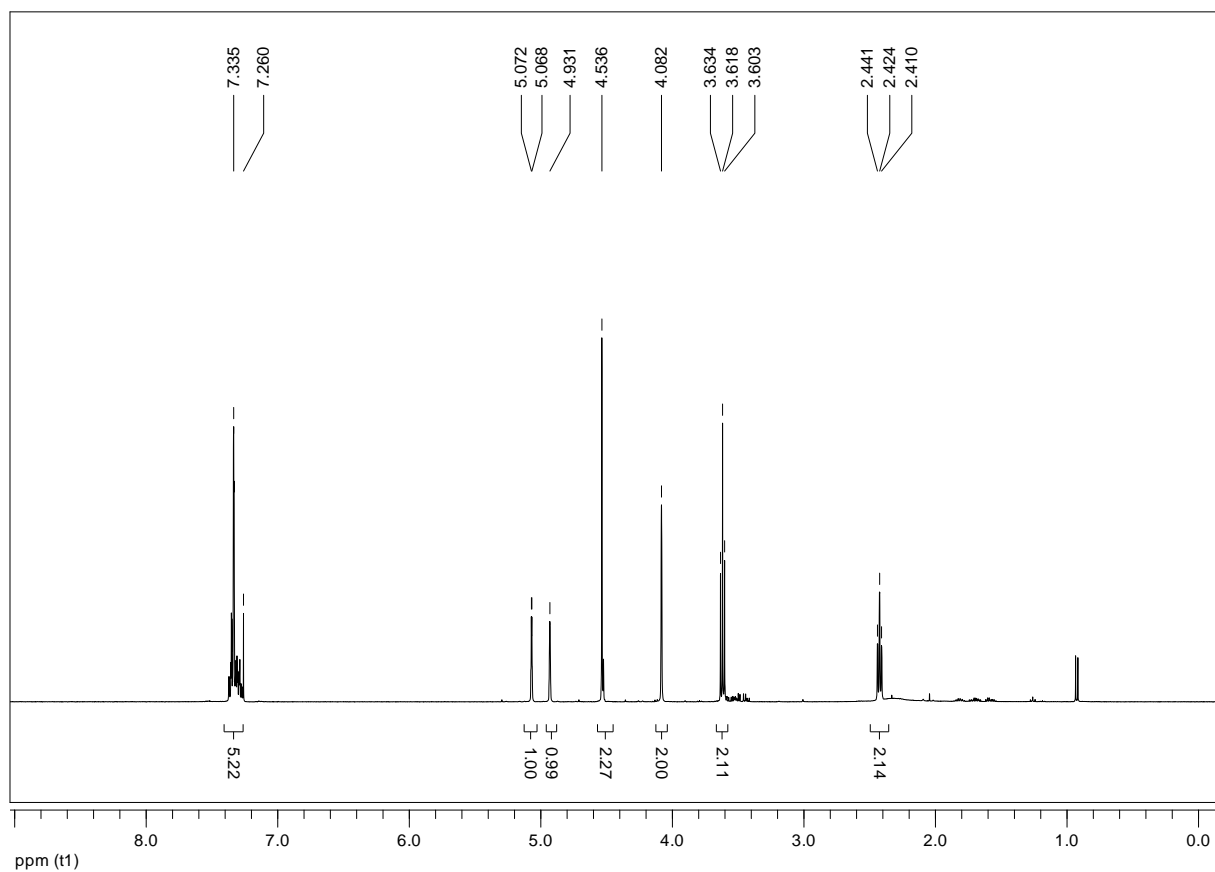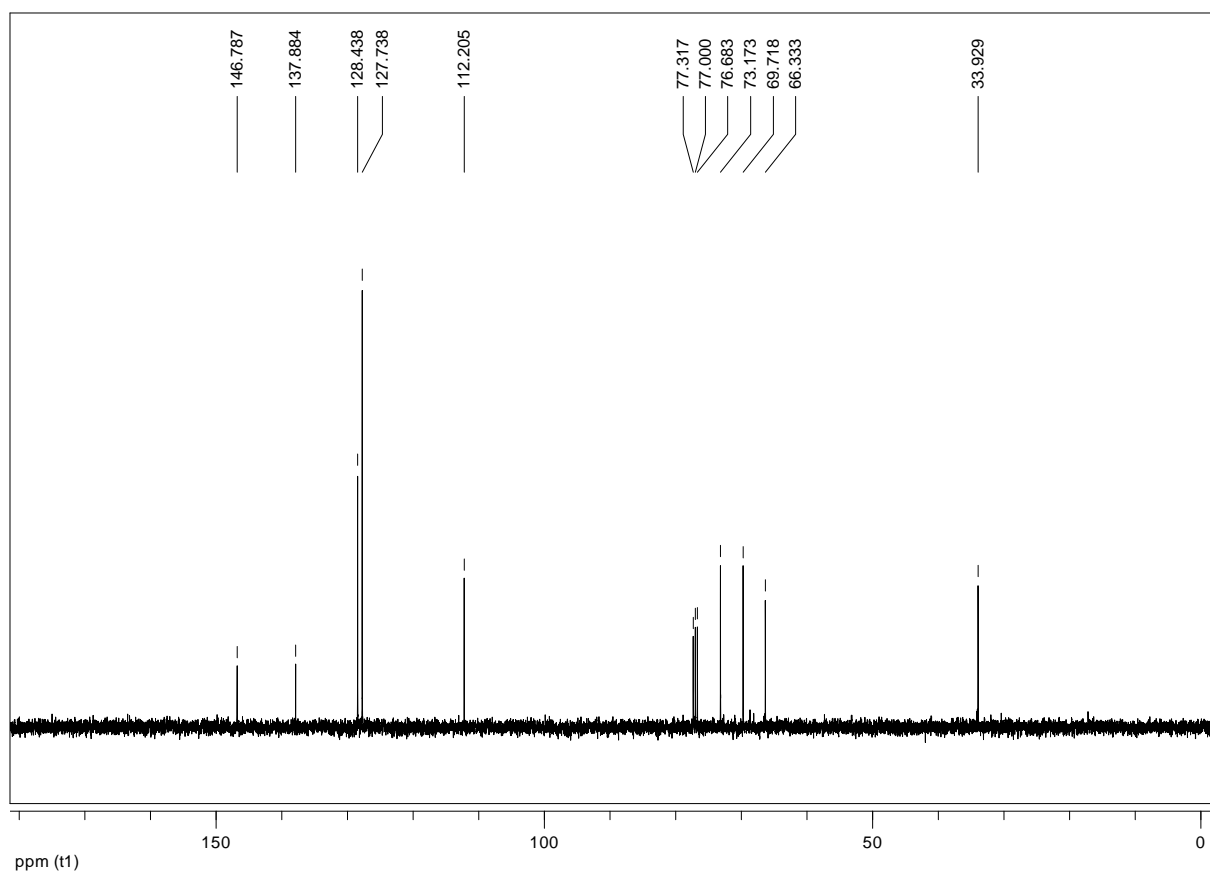

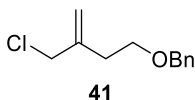

**(((3-(Chloromethyl)but-3-en-1-yl)oxy)methyl)benzene (41):**

**Finkelstein reaction:** To a suspension of **39** (1.32 g, 6.87 mmol, 1.0 equiv) and LiCl (660 mg, 15.6 mmol, 2.3 equiv) in DMF (33 mL) was added dropwise at 0 °C 2,6-lutidine (1.81 mL, 15.5 mmol, 2.3 equiv) and MsCl (0.94 mL, 12.1 mmol, 1.8 equiv). The reaction mixture was stirred at 0 °C for 3 h and was allowed to warm to rt over 2 h. After quenching with water (70 mL) at 0 °C, the mixture was extracted with Et<sub>2</sub>O (3 x 120 mL). The combined organic extracts were washed with water (50 mL) and brine (50 mL), dried over MgSO<sub>4</sub> and concentrated under reduced pressure. The residue was purified by column chromatography (hexane/Et<sub>2</sub>O, 60:1 → 40:1 → 20:1) to provide **41** (1.27 g, 88%) as a yellow liquid.

**Appel reaction:** To a solution of **39** (12.2 g, 63.5 mmol, 1.0 equiv) in acetonitrile (8.0 mL) was added at 0 °C triphenylphosphine (21.6 g, 82.4 mmol, 1.3 equiv) and tetrachloromethane (8.0 mL, 82.9 mmol, 1.3 equiv). After stirring for 2 h at rt, the reaction mixture was directly purified by column chromatography (hexane/Et<sub>2</sub>O, 20:1) to provide **41** (12.7 g, 95%) as a colorless liquid.

**R<sub>f</sub>** = 0.33 (hexane/Et<sub>2</sub>O, 20:1).

**<sup>1</sup>H-NMR** (400.1 MHz, CDCl<sub>3</sub>): δ = 7.39-7.26 (m, 5H), 5.20 (s, 1H), 5.04 (q, *J* = 1.2 Hz, 1H), 4.53 (s, 2H), 4.08 (d, *J* = 0.9 Hz, 2H), 3.64 (t, *J* = 6.5 Hz, 2H), 2.51 (dt, *J* = 0.7, 6.5 Hz, 2H).

**<sup>13</sup>C-NMR** (100.6 MHz, CDCl<sub>3</sub>): δ = 142.6, 138.3, 128.4, 127.6 (2C), 115.9, 73.0, 68.5, 48.4, 33.3.

**IR** (neat, ν/cm<sup>-1</sup>): 3087w, 3064w, 3031w, 2947w, 2859m, 1496w, 1453m, 1361m, 1258m, 1206w, 1100s, 1028m, 909m, 737s, 698s, 611w.

**HRMS (EI):** *m/z* calcd for C<sub>12</sub>H<sub>15</sub>ClO [M]<sup>+</sup>: 210.0806, found: 210.0812. (For <sup>35</sup>Cl).

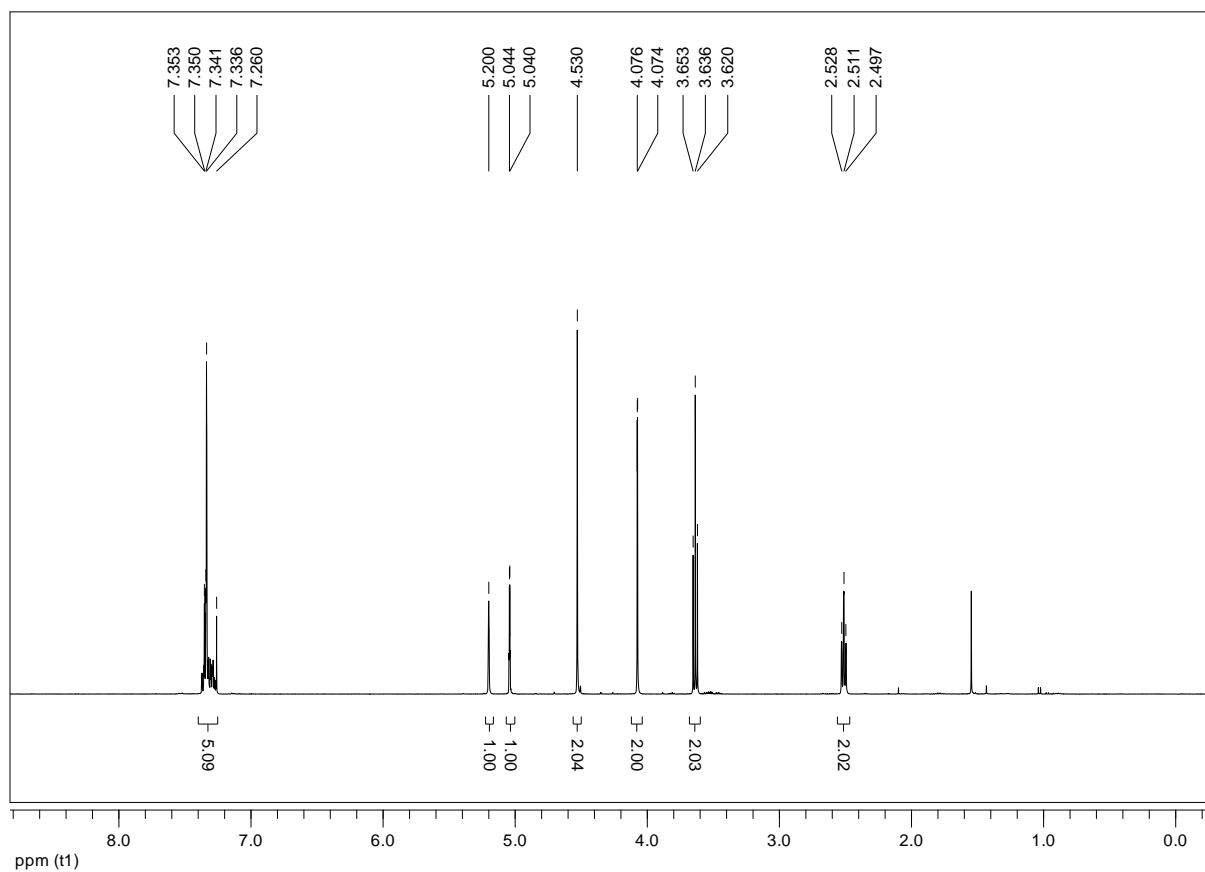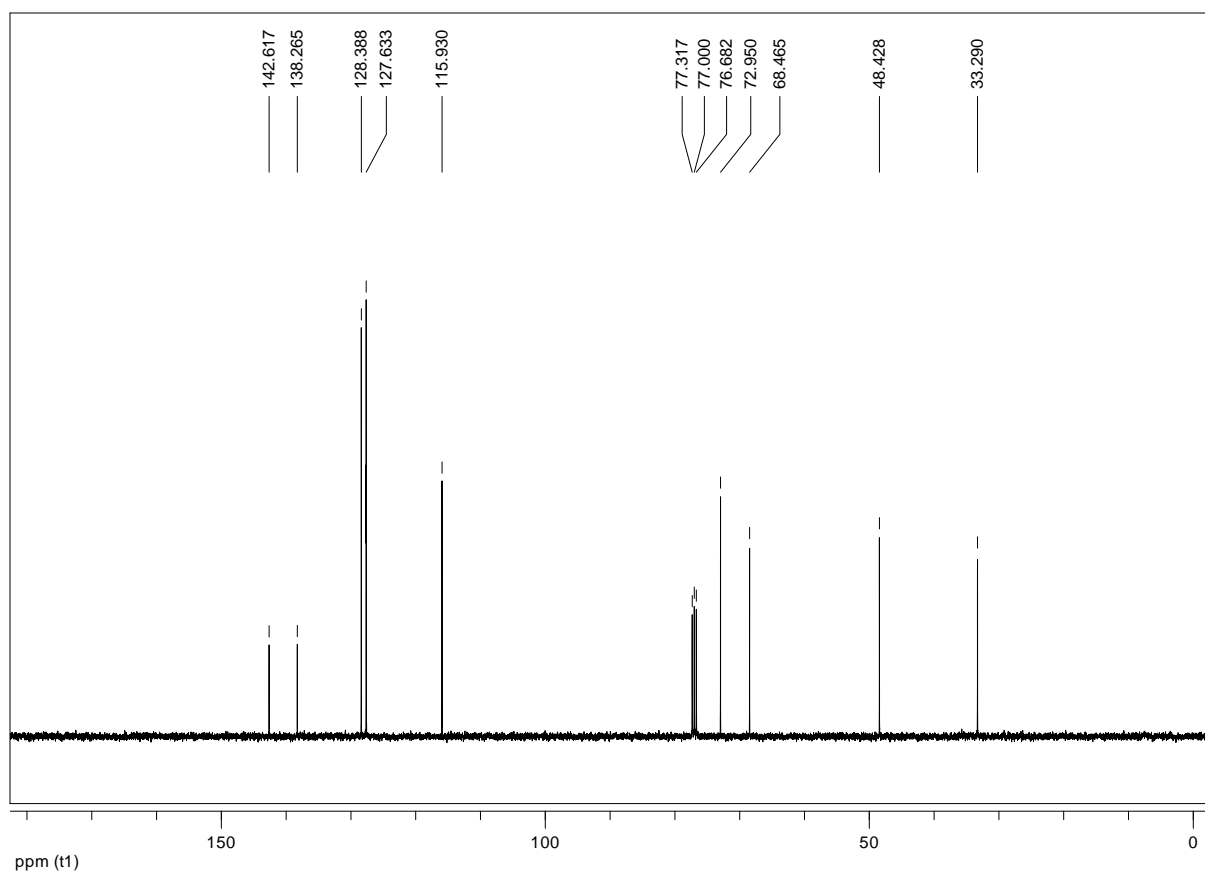

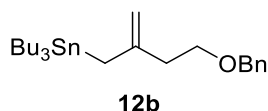

**(4-(Benzyloxy)-2-methylenebutyl)tributylstannane (12b):** Mg (1.28 g, 52.8 mmol, 1.4 equiv) was dried with a heat gun under vacuum. After the flask had cooled to rt, THF (56 mL) was added followed by tributyltin chloride (10.0 mL, 36.9 mmol, 1.0 equiv) and a crystal of iodine. **41** (10.1 g, 47.9 mmol, 1.3 equiv) was added to this mixture with stirring at 0 °C and with external ultrasound irradiation over a period of 30 min (+3 mL THF for washing). After stirring for 1.5 h (ultrasound) at 0 °C, a suspension was formed. At this point a few drops of dibromoethane were added and the reaction mixture was allowed to warm to rt. The reaction mixture was heated to reflux with a heat gun, the salts precipitated immediately and some more THF was added (10 mL). After stirring over night at rt, the reaction was quenched at 0 °C with water (200 mL) and diluted with ether (250 mL). The layers were separated and the aqueous layer was extracted once with ether (300 mL). The combined organic extracts were washed with brine (160 mL), dried over MgSO<sub>4</sub> and concentrated under reduced pressure to give the crude stannane **12b** (19.0 g, 80% purity).

**<sup>1</sup>H-NMR** (400.1 MHz, CDCl<sub>3</sub>): δ = 7.39-7.25 (m, 5H), 4.58 (m<sub>c</sub>, 1H), 4.53 (m<sub>c</sub>, 2H), 4.49 (m<sub>c</sub>, 1H), 3.59 (t, *J* = 7.1 Hz, 2H), 2.27 (t, *J* = 7.1 Hz, 2H), 1.80 (s, 2H), 1.56-1.40 (m, 6H), 1.30 (m<sub>c</sub>, 6H), 0.95-0.82 (m, 15H).

**<sup>13</sup>C-NMR** (100.6 MHz, CDCl<sub>3</sub>): δ = 146.9, 138.6, 128.3, 127.6, 127.5, 106.0, 72.9, 69.3, 38.2, 29.1, 27.3, 19.4, 13.7, 9.5.

**<sup>119</sup>Sn-NMR** (186.5 MHz, CDCl<sub>3</sub>): δ = -14.8.

**HRMS (ESI):** *m/z* calcd for C<sub>24</sub>H<sub>42</sub>NaOSn [M + Na]<sup>+</sup>: 489.2154; found: 489.2158.



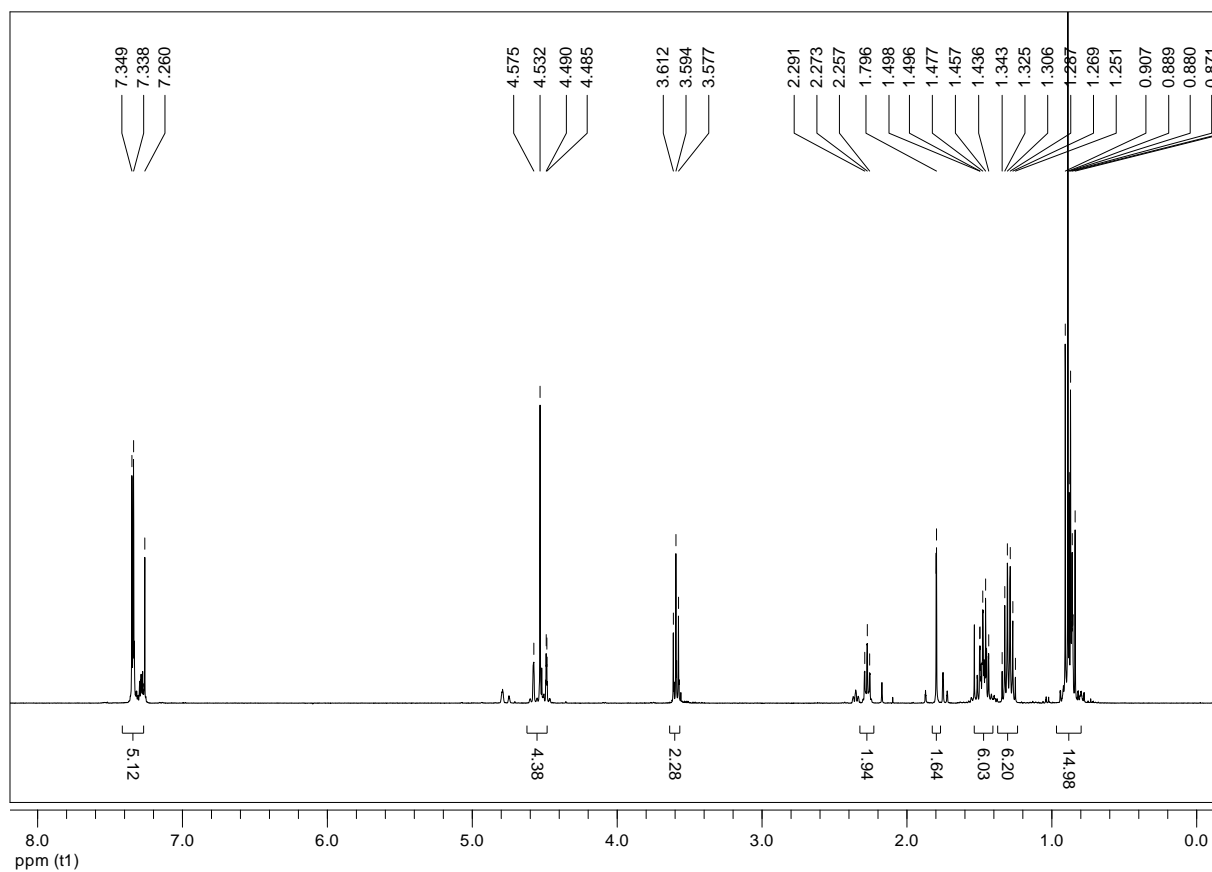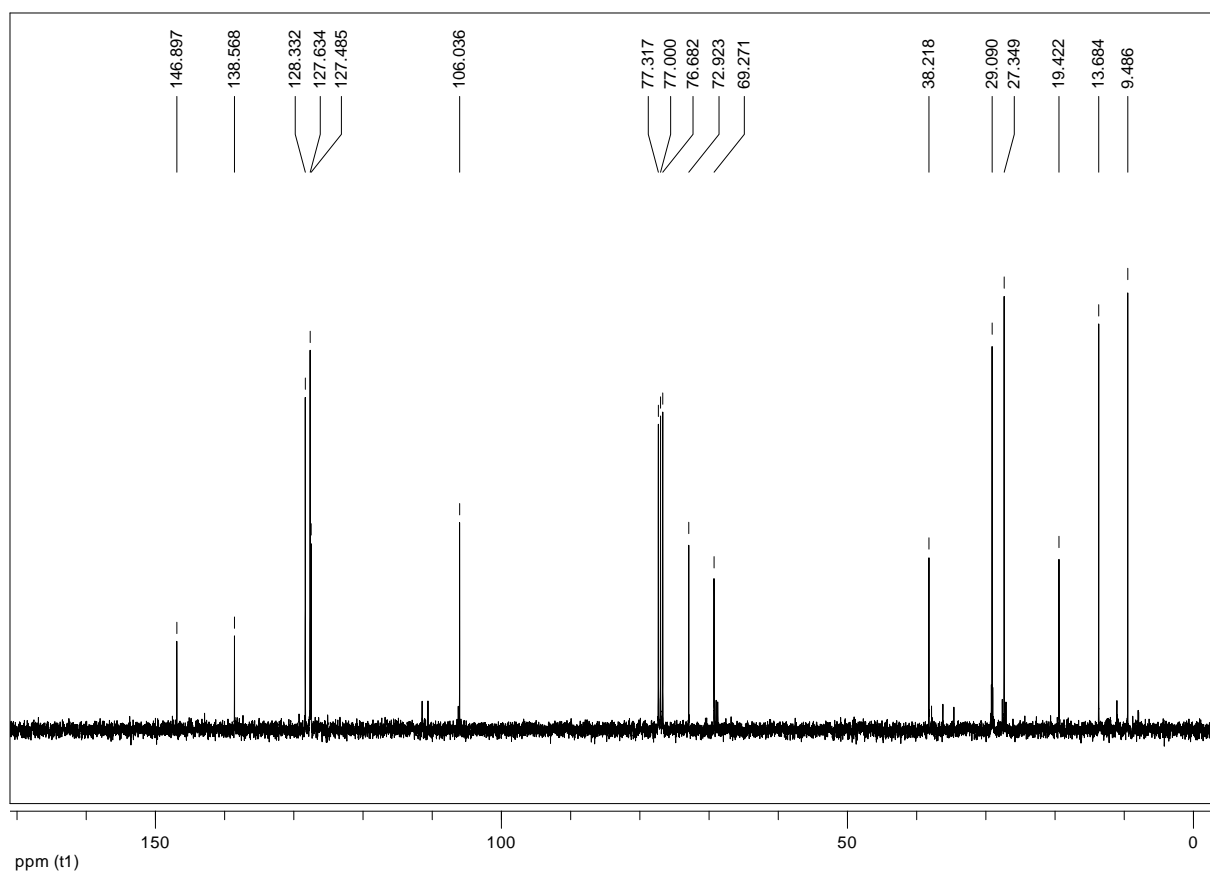

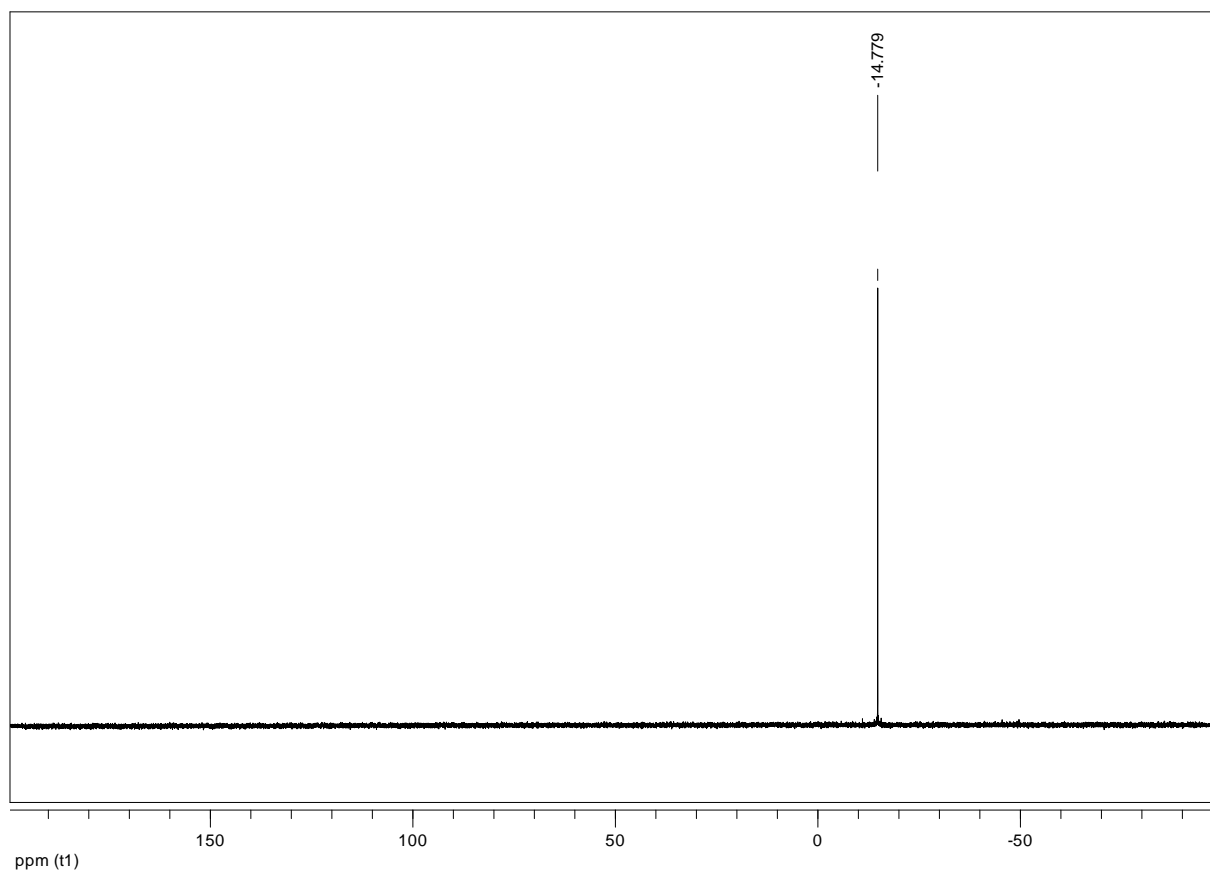

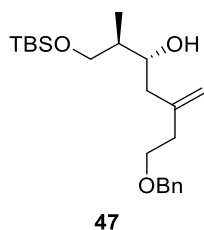

**(2*R*,3*R*)-7-(benzyloxy)-1-(*tert*-butyldimethylsilyloxy)-2-methyl-5-**

**methyleneheptan-3-ol (47):** The reaction was performed in two parallel batches. A 250 mL Schlenk flask was charged with (*R,R*)-*N,N'*-bis-*para*-toluenesulfonyl-1,2-diamino-1,2-diphenylethane (**48**) (4.98 g, 9.57 mmol, 1.03 equiv) and heated to 90 °C under high vacuum (0.03 mbar). After 16 h, the resulting colorless solid was cooled to rt and CH<sub>2</sub>Cl<sub>2</sub> (65 mL) was added. This solution was cooled to 0 °C and treated with BBr<sub>3</sub> (9.6 mL, 9.60 mmol, 1.04 equiv, 1.0 M in CH<sub>2</sub>Cl<sub>2</sub>). The resulting brownish solution was stirred at 0 °C for 10 min, warmed to rt, and stirred for 1 h. The solvent and HBr were removed carefully under reduced pressure (Schlenk). The resulting solid was dried under high vacuum for 1.5 h and was then dissolved in CH<sub>2</sub>Cl<sub>2</sub> (87 mL), the solution was cooled to 0 °C, and **12b** (5.00 g, 10.7 mmol, 1.16 equiv) was added dropwise. After stirring for 16 h at rt, a solution of **11a** (1.87 g, 9.25 mmol, 1.00 equiv, crude) in CH<sub>2</sub>Cl<sub>2</sub> (20 mL + 3 mL for washing) was added dropwise at -78 °C over 1 h by means of a mechanical syringe pump. The reaction mixture was stirred for 2 h at -78 °C; then pH 7 buffer (50 mL) was added and the mixture was allowed to warm to rt. At this point both batches of material were combined. The layers were separated and the aqueous phase was extracted with CH<sub>2</sub>Cl<sub>2</sub> (3 x 60 mL). The combined organic extracts were washed with brine, dried over MgSO<sub>4</sub> and concentrated under reduced pressure. The resulting solid was dissolved in Et<sub>2</sub>O and filtered to recover the ligand (9.36 g, 94% recovery). The filtrate was concentrated and the residue was purified by column chromatography (hexane/Et<sub>2</sub>O, 10:1 → 5:1 → 4:1) to provide **47** (5.16 g, 74%, *dr* 91:9) as a slightly yellowish oil.

**R<sub>f</sub>** = 0.19 (hexane/ Et<sub>2</sub>O, 5:1)

**[α]<sub>D</sub><sup>24</sup>** = -0.35° [*c* = 0.511, CHCl<sub>3</sub>]

**<sup>1</sup>H-NMR** (400.1 MHz, CDCl<sub>3</sub>): δ = 7.37-7.24 (m, 5H), 4.91 (dd, *J* = 1.4, 3.0 Hz, 2H), 4.52 (s, 2H), 3.97 (ddd, *J* = 2.8, 5.2, 11.3 Hz, 1H), 3.68 (ddd, *J* = 4.9, 9.8, 15.3 Hz, 2H), 3.61 (t, *J* = 6.8 Hz, 2H), 2.88 (d, *J* = 3.0 Hz, 1H), 2.40 (dt, *J* = 2.8, 6.9 Hz, 2H), 2.28 -2.13 (m, 2H), 1.71 (mc, 1H), 0.92 (d, *J* = 7.0 Hz, 3H), 0.90 (s, 9H), 0.07 (s, 6H).

**<sup>13</sup>C-NMR** (100.6 MHz, CDCl<sub>3</sub>): δ = 144.0, 138.4, 128.3, 127.7, 127.5, 113.3, 72.9, 71.6, 68.9, 67.8, 41.6, 39.0, 35.8, 25.9, 18.2, 10.3, -5.6.

**IR** (neat, ν/cm<sup>-1</sup>): 3483br, 2954m, 2930m, 2857m, 1467w, 1362w, 1254m, 1092s, 1025m, 836s, 776s, 738m, 697m, 669w.

**HRMS (ESI)**: *m/z* calcd for C<sub>22</sub>H<sub>39</sub>O<sub>3</sub>Si [M + H]<sup>+</sup>: 379.2663; found: 379.2662.

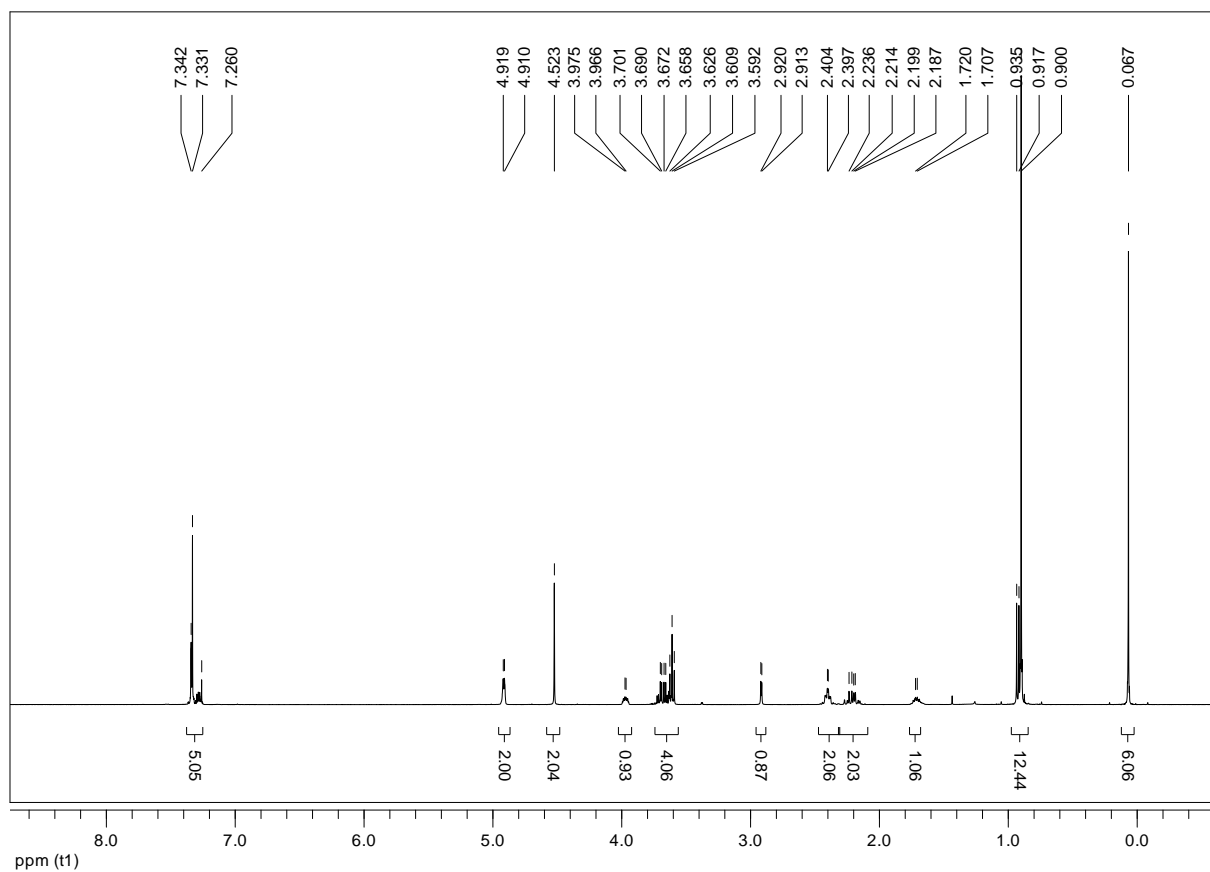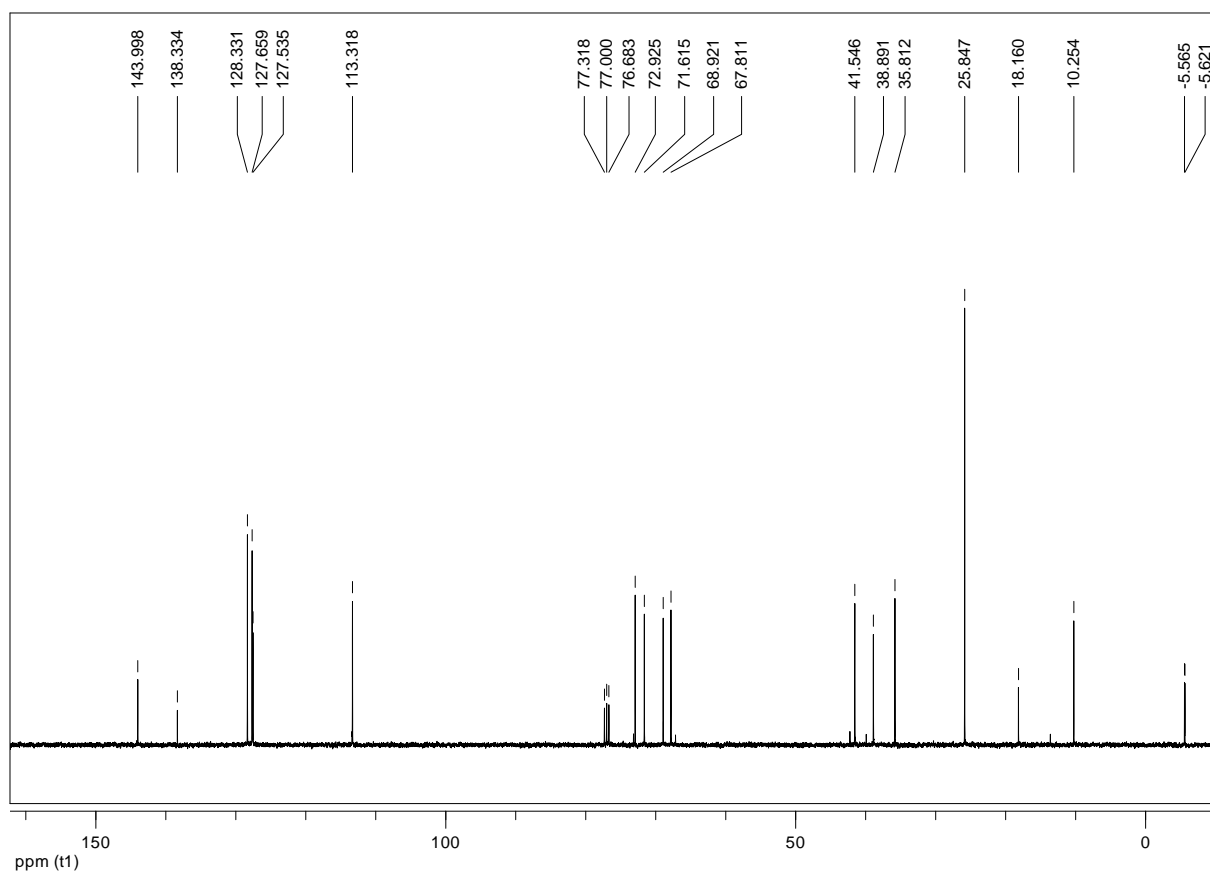

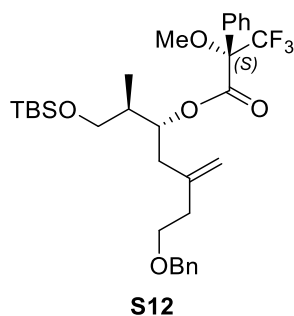

**S-Mosher ester S12:** To a solution of **47** (16.1 mg, 42.5  $\mu\text{mol}$ , 1.0 equiv) in pyridine (0.1 mL, 1.24 mmol, 29 equiv) was added DMAP (15.5 mg, 127  $\mu\text{mol}$ , 3.0 equiv) and (*R*)-(-)-MTPA-Cl (29  $\mu\text{L}$ , 155  $\mu\text{mol}$ , 3.7 equiv). The reaction mixture was stirred for 16 h at rt and quenched with water (1 mL). The aqueous phase was extracted with  $\text{CH}_2\text{Cl}_2$  (3 x 6 mL) and the combined organic extracts were dried over  $\text{MgSO}_4$ , filtered and the solvent was removed under reduced pressure. The crude product was purified by column chromatography (hexane/ $\text{Et}_2\text{O}$ , 10:1) to afford **S12** as a colorless oil (12.4 mg, 49%, 77% brsm).

$R_f$  = 0.50 (hexane/  $\text{Et}_2\text{O}$ , 5:1)

$[\alpha]_{\text{D}}^{24} = -26.7^\circ$  [ $c$  = 0.570,  $\text{CHCl}_3$ ]

**$^1\text{H-NMR}$**  (400.1 MHz,  $\text{CDCl}_3$ ):  $\delta$  = 7.59-7.48 (m, 2H), 7.44-7.22 (m, 8H), 5.51 (dt,  $J$  = 2.6, 7.2 Hz, 1H), 4.90 (d,  $J$  = 2.8 Hz, 2H), 4.52 (s, 2H), 3.62 (t,  $J$  = 6.6 Hz, 2H), 3.53 (s, 3H), 3.32 (d,  $J$  = 2.6 Hz, 1H), 3.31 (d,  $J$  = 3.6 Hz, 1H), 2.51 (dd,  $J$  = 7.2, 14.1 Hz, 1H), 2.42 (t,  $J$  = 6.6 Hz, 2H), 2.38 ( $m_c$ , 1H), 1.88 ( $m_c$ , 1H), 0.88 (s, 9H), 0.84 (d,  $J$  = 6.9 Hz, 3H), 0.00 (s, 6H).

**$^{13}\text{C-NMR}$**  (100.6 MHz,  $\text{CDCl}_3$ ):  $\delta$  = 165.9, 142.1, 138.4, 132.5, 129.5, 128.3, 128.2, 127.6, 127.5, 127.5, 123.4 (q,  $J$  = 288 Hz), 114.4, 74.6, 72.9, 68.5, 64.3, 55.4, 38.3, 38.3, 35.4, 25.8, 18.1, 10.1, -5.5. (quaternary carbon not visible)

**IR** (neat,  $\text{v}/\text{cm}^{-1}$ ): 3066w, 2953m, 2930m, 2858m, 1747s, 1472w, 1257s, 1169s, 1104s, 1020m, 912w, 837s, 775m, 722m, 697m.

**HRMS (ESI):**  $m/z$  calcd for  $\text{C}_{32}\text{H}_{49}\text{F}_3\text{NO}_5\text{Si}$  [ $\text{M} + \text{NH}_4$ ] $^+$ : 612.3327; found: 612.3313.

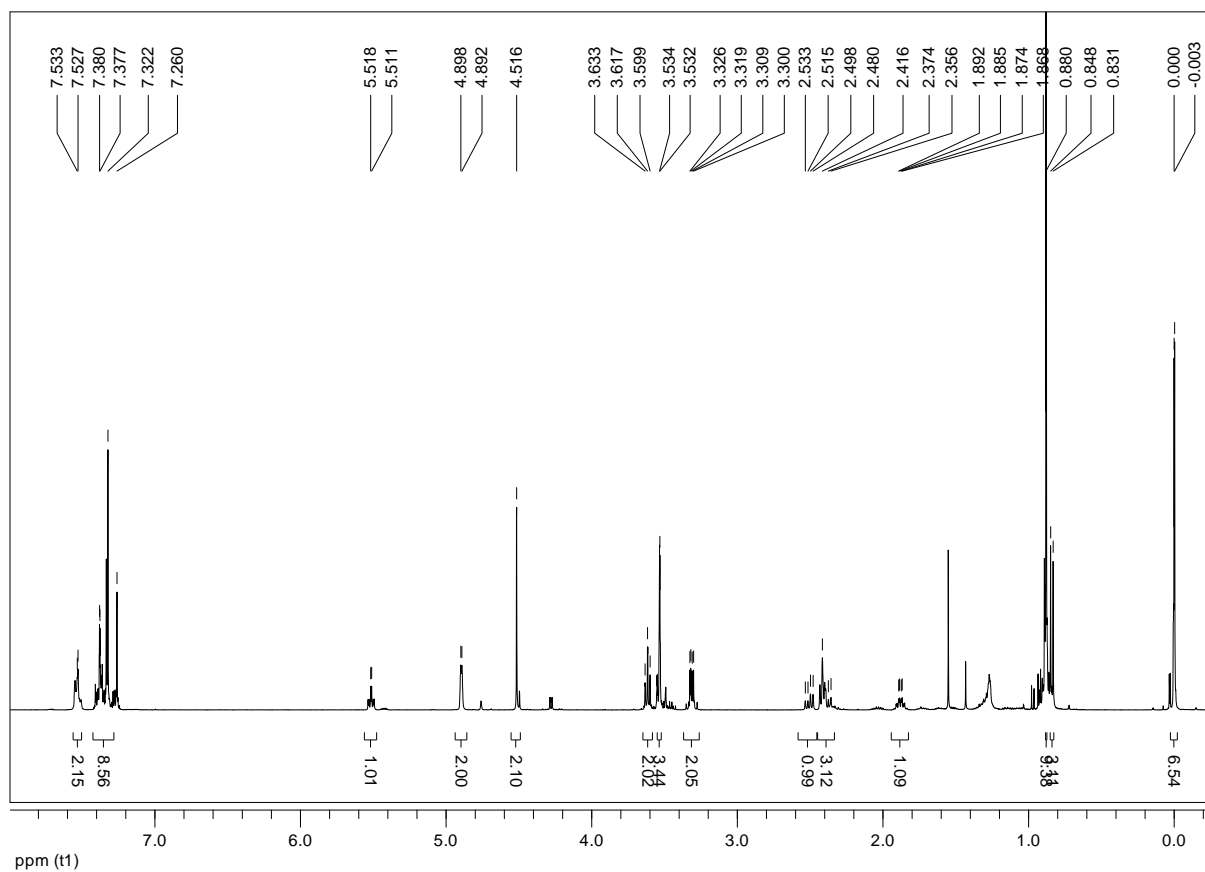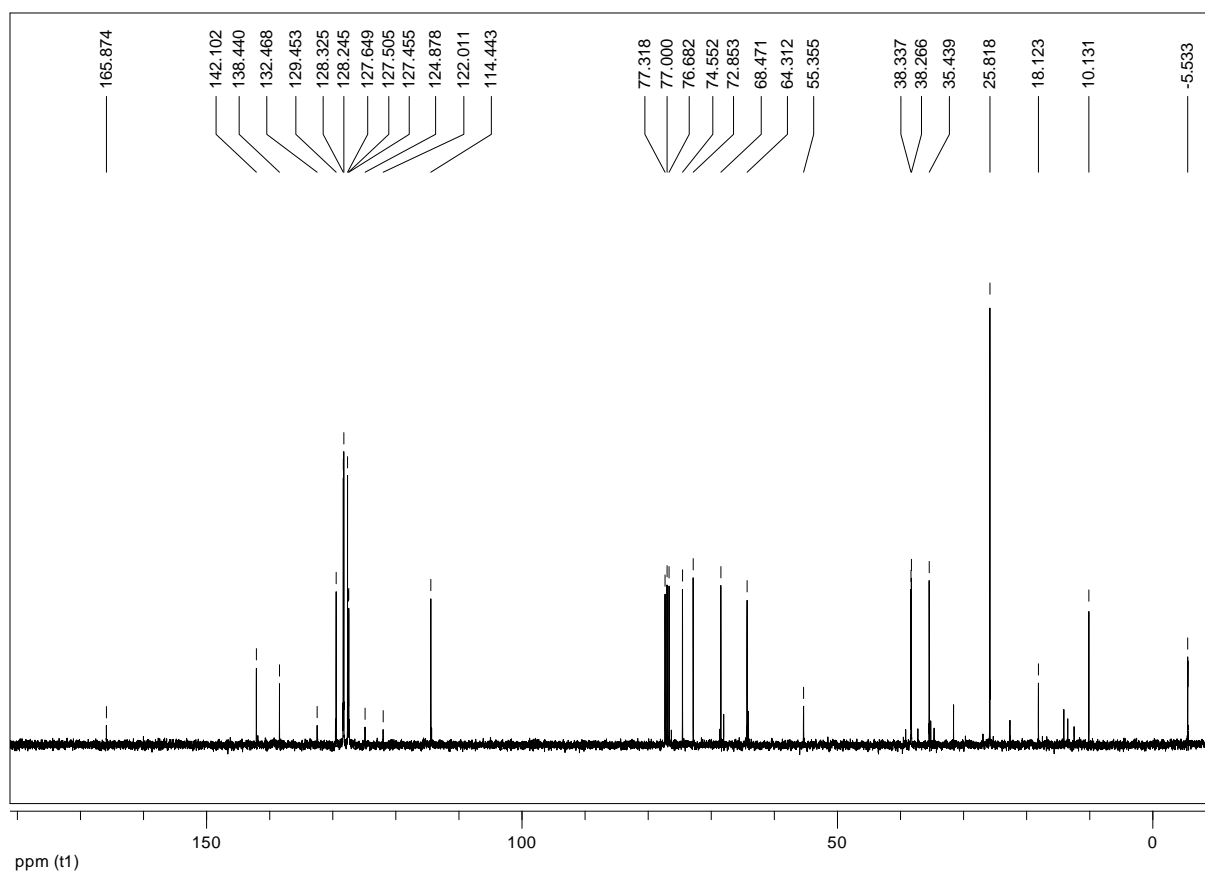

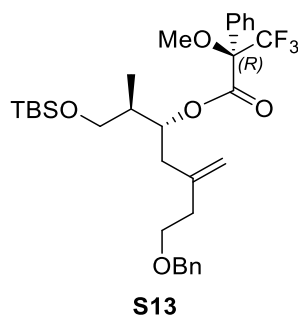

**R-Mosher ester S13:** To a solution of **47** (17.3 mg, 45.7  $\mu$ mol, 1.0 equiv) in pyridine (0.1 mL, 1.24 mmol, 27 equiv) was added DMAP (17.5 mg, 143  $\mu$ mol, 3.1 equiv) and (*S*)-(-)-MTPA-Cl (29  $\mu$ L, 155  $\mu$ mol, 3.4 equiv). The reaction mixture was stirred for 16 h at rt and quenched with water (1 mL). The aqueous phase was extracted with  $\text{CH}_2\text{Cl}_2$  (3 x 6 mL) and the combined organic extracts were dried over  $\text{MgSO}_4$ , filtered and the solvent was removed under reduced pressure. The crude product was purified by column chromatography (hexane/ $\text{Et}_2\text{O}$ , 10:1) to afford **S13** as a colorless oil (22.7 mg, 84%).

$R_f$  = 0.50 (hexane/  $\text{Et}_2\text{O}$ , 5:1)

$[\alpha]_D^{24} = +4.4^\circ$  [ $c$  = 1.07,  $\text{CHCl}_3$ ]

**$^1\text{H-NMR}$**  (400.1 MHz,  $\text{CDCl}_3$ ):  $\delta$  = 7.56-7.48 (m, 2H), 7.44-7.25 (m, 8H), 5.51 (dt,  $J$  = 2.7, 7.1 Hz, 1H), 4.84 (s, 2H), 4.52 (s, 2H), 3.61 (t,  $J$  = 6.6 Hz, 2H), 3.49 (s, 3H), 3.43 (s, 1H), 3.41 (d,  $J$  = 1.8 Hz, 1H), 2.46 (dd,  $J$  = 7.4, 14.1 Hz, 1H), 2.41 (t,  $J$  = 6.7 Hz, 2H), 2.32 (dd,  $J$  = 6.9, 14.1 Hz, 1H), 1.91 (mc, 1H), 0.89 (s, 9H), 0.88 (d,  $J$  = 4.6 Hz, 3H), 0.02 (s, 6H).

**$^{13}\text{C-NMR}$**  (100.6 MHz,  $\text{CDCl}_3$ ):  $\delta$  = 166.0, 141.9, 138.5, 132.3, 129.5, 128.3, 128.3, 127.7, 127.6, 127.5, 123.4 (q,  $J$  = 288 Hz), 114.5, 74.5, 72.9, 68.5, 64.5, 55.2, 38.3, 35.4, 25.8, 18.1, 10.3, -5.5. (quaternary carbon not visible)

**IR** (neat,  $\text{v}/\text{cm}^{-1}$ ): 3068w, 2953m, 2929m, 2857m, 1744s, 1471w, 1256s, 1169s, 1104s, 1017m, 903w, 837s, 777m, 721m, 698m.

**HRMS (ESI):**  $m/z$  calcd for  $\text{C}_{32}\text{H}_{49}\text{F}_3\text{NO}_5\text{Si}$  [ $\text{M} + \text{NH}_4$ ] $^+$ : 612.3327; found: 612.3320.



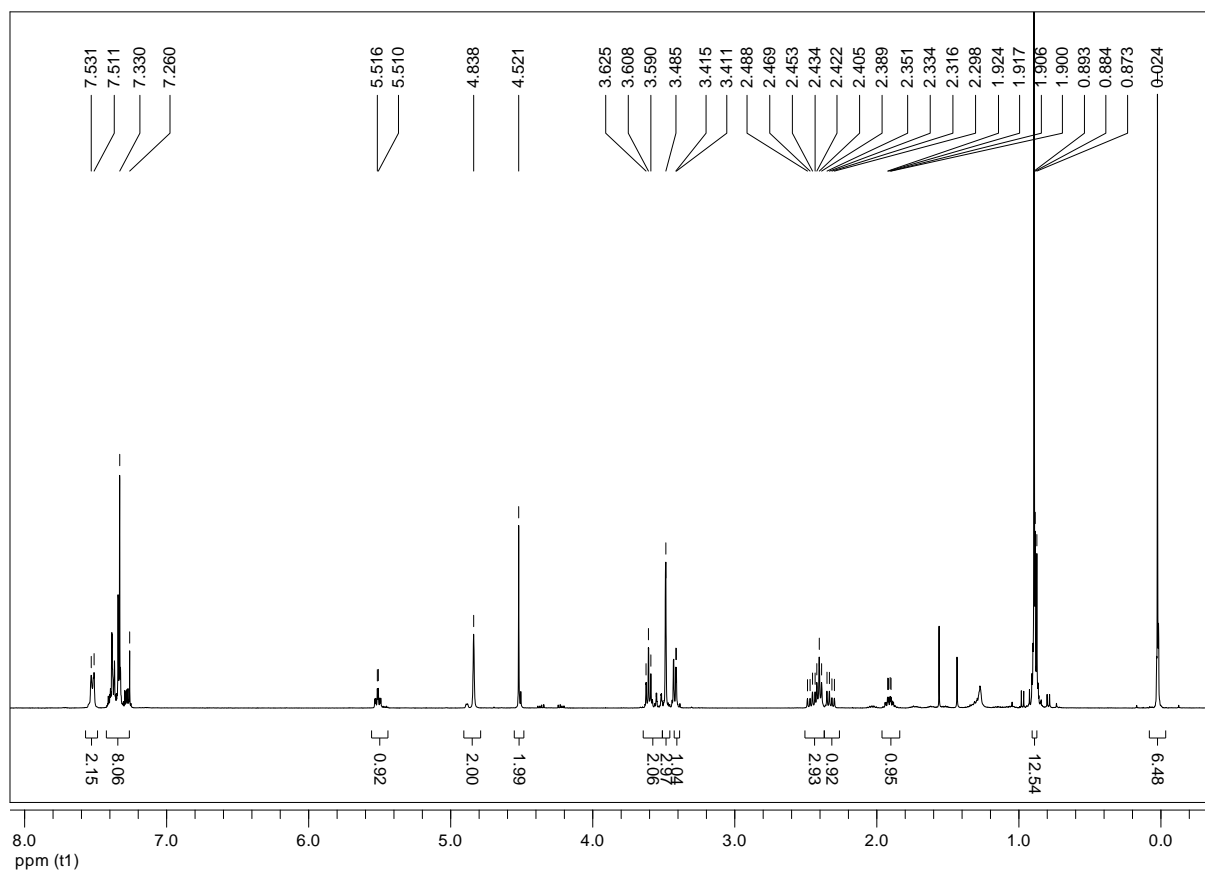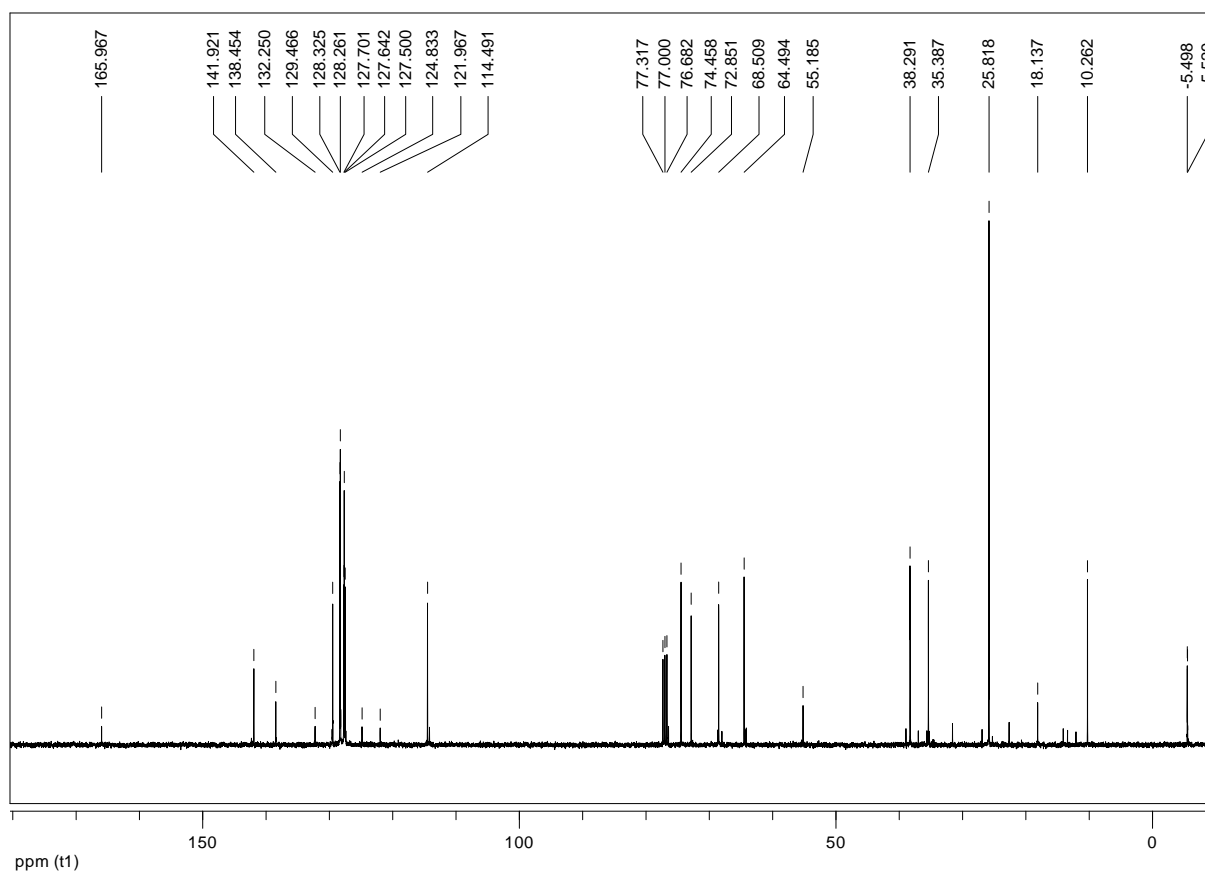

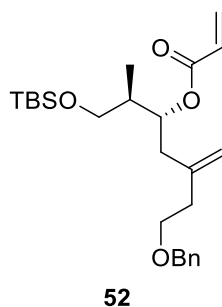

**(2*R*,3*R*)-7-(Benzyloxy)-1-(*tert*-butyldimethylsilyloxy)-2-methyl-5-**

**methylenheptan-3-yl acrylate (52):** To a solution of **47** (5.16 g, 13.6 mmol, 1.0 equiv) in CH<sub>2</sub>Cl<sub>2</sub> (115 mL) was added at –40 °C DIPEA (10.1 mL, 58.6 mmol, 4.3 equiv) followed by dropwise addition of acryloylchloride (4.44 mL, 54.5 mmol, 4.0 equiv). The yellow reaction mixture was stirred at –50 °C for 1.5 h and then transferred into a vigorously stirred solution of sat. NaHCO<sub>3</sub> (100 mL). CH<sub>2</sub>Cl<sub>2</sub> (70 mL) was then added and the mixture was stirred for 30 min; during this period the pH of the aqueous phase was controlled (pH 6-7) to prevent loss of TBS by acid formation (if necessary, some solid NaHCO<sub>3</sub> was added). The layers were separated and the aqueous phase was extracted with CH<sub>2</sub>Cl<sub>2</sub> (2 x 70 mL). The combined organic extracts were washed with brine, dried over MgSO<sub>4</sub> and concentrated under reduced pressure. The residue was purified by column chromatography (hexane/Et<sub>2</sub>O, 30:1 → 7:1) to afford **52** (5.02 g, 85%) as a colorless oil.

**R<sub>f</sub>** = 0.51 (hexane/ Et<sub>2</sub>O, 5:1)

**[α]<sub>D</sub><sup>24</sup>** = –5.0° [*c* = 0.533, CHCl<sub>3</sub>]

**<sup>1</sup>H-NMR** (400.1 MHz, CDCl<sub>3</sub>): δ = 7.36-7.24 (m, 5H), 6.35 (dd, *J* = 1.5, 17.3 Hz, 1H), 6.08 (dd, *J* = 10.4, 17.3 Hz, 1H), 5.78 (dd, *J* = 1.6, 10.4 Hz, 1H), 5.27 (ddd, *J* = 3.6, 6.2, 7.8 Hz, 1H), 4.85 (s, 2H), 4.52 (s, 2H), 3.61 (t, *J* = 6.8 Hz, 2H), 3.46 (dq, *J* = 6.6, 9.9 Hz, 2H), 2.45-2.28 (m, 4H), 1.89 (mc, 1H), 0.93 (d, *J* = 6.9 Hz, 3H), 0.89 (s, 9H), 0.01 (s, 6H).

**<sup>13</sup>C-NMR** (100.6 MHz, CDCl<sub>3</sub>): δ = 165.6, 142.7, 138.5, 130.1, 128.9, 128.3, 127.6, 127.4, 113.9, 72.8, 72.2, 68.7, 64.9, 38.8, 38.7, 35.7, 25.9, 18.2, 11.0, –5.5.

**IR** (neat, ν/cm<sup>–1</sup>): 2953m, 2930m, 2857m, 1723s, 1459w, 1405m, 1268m, 1192s, 1095s, 1045m, 984m, 836s, 775s, 736m, 698m.

**HRMS (ESI):** *m/z* calcd for C<sub>25</sub>H<sub>44</sub>NO<sub>4</sub>Si [M + NH<sub>4</sub>]<sup>+</sup>: 450.3034; found: 450.3048.

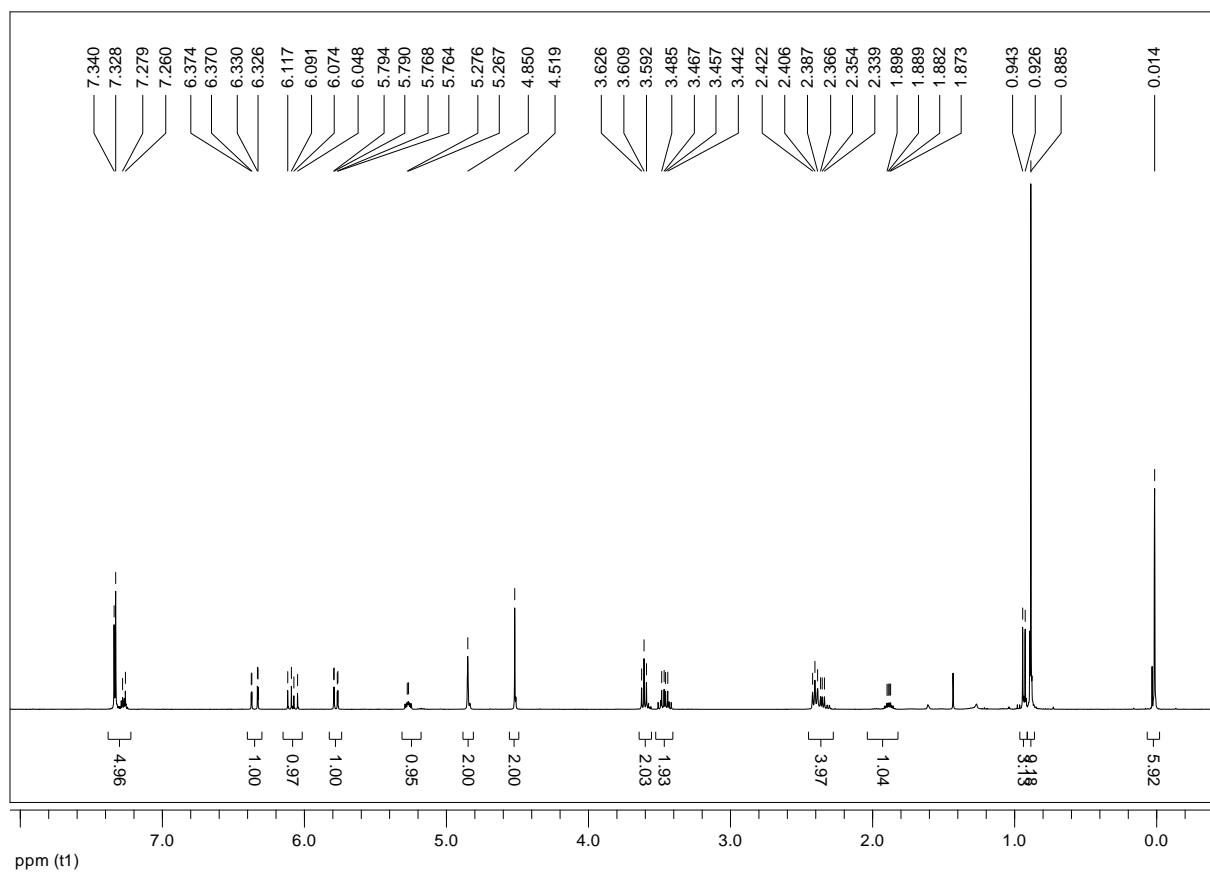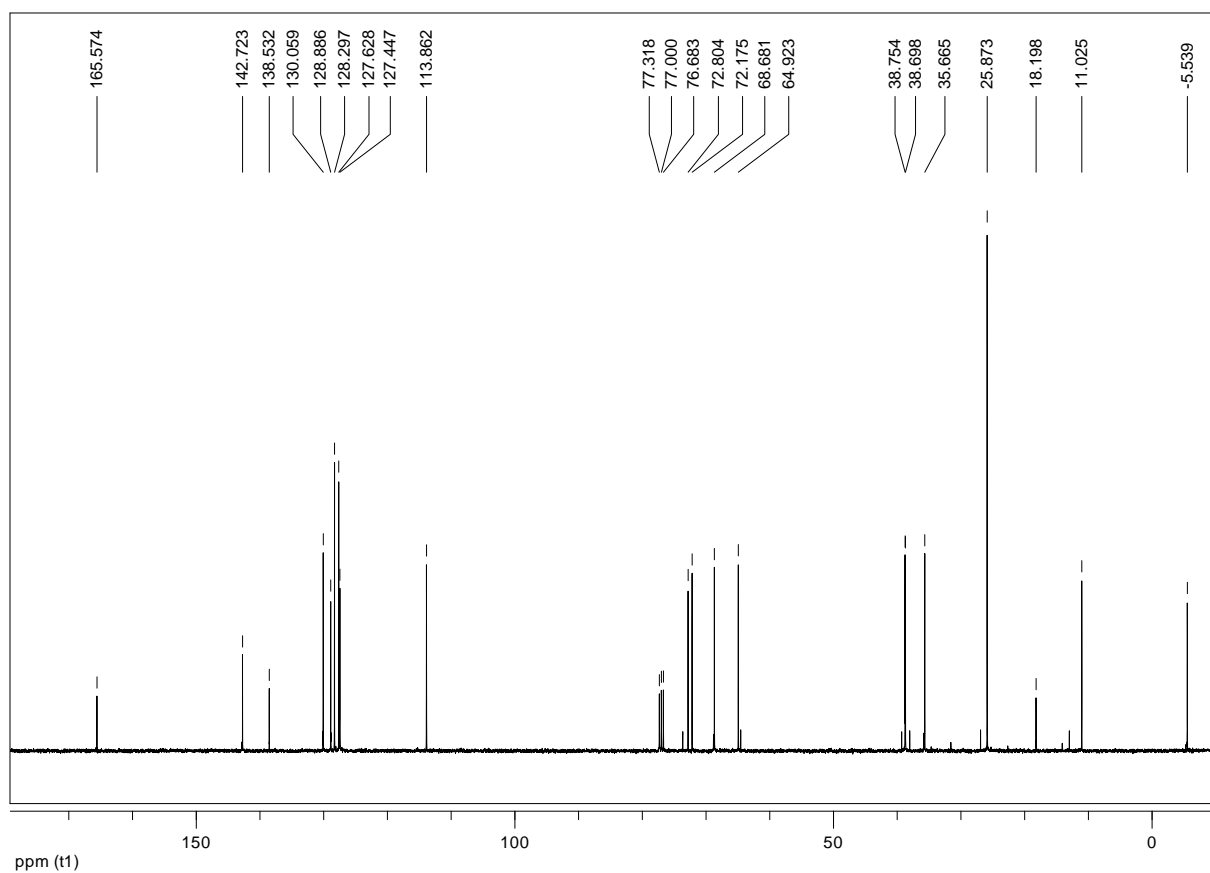

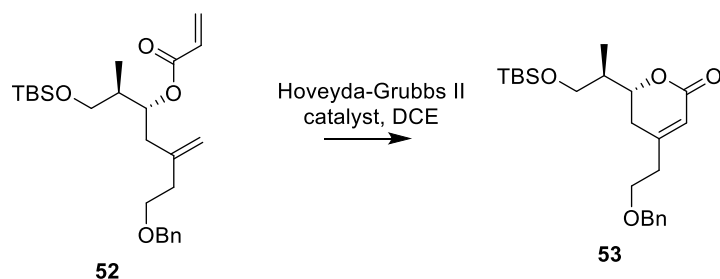

**(*R*)-4-(2-(Benzyloxy)ethyl)-6-((*R*)-1-(*tert*-butyldimethylsilyloxy)propan-2-yl)-5,6-dihydro-2H-pyran-2-one (**53**):** To a solution of **52** (44.9 mg, 0.10 mmol, 1.0 equiv) in DCE (1.0 mL) was added *Hoveyda-Grubbs*' 2<sup>nd</sup> generation catalyst (3.9 mg, 6.0 mol%). After refluxing for 24 h, a solution of *Hoveyda-Grubbs*' 2<sup>nd</sup> generation catalyst (2.4 mg, 3.7 mol%) in DCE (0.4 mL) was added. After refluxing for 17 h, the reaction mixture was concentrated under reduced pressure and the residue was purified by column chromatography (hexane/EtOAc, 6:1 → 3:1) to afford **53** (37.4 mg, 89%) as a greenish oil. In addition, 2.4 mg of the catalyst were recovered (38%).

$R_f$  = 0.37 (hexane/EtOAc, 3:1)

$[\alpha]_D^{24}$  = +35.8° [ $c$  = 0.667, CHCl<sub>3</sub>].

**<sup>1</sup>H-NMR** (400.1 MHz, CDCl<sub>3</sub>):  $\delta$  = 7.38-7.26 (m, 5H), 5.85 (m<sub>c</sub>, 1H), 4.51 (s, 2H), 4.47 (td,  $J$  = 3.8, 12.8 Hz, 1H), 3.67-3.55 (m, 2H), 3.64 (t,  $J$  = 6.2 Hz, 2H), 2.57-2.43 (m, 3H), 2.16 (dd,  $J$  = 3.5, 17.8 Hz, 1H), 1.86 (m<sub>c</sub>, 1H), 0.99 (d,  $J$  = 6.9 Hz, 3H), 0.88 (s, 9H), 0.04 (s, 6H).

**<sup>13</sup>C-NMR** (100.6 MHz, CDCl<sub>3</sub>):  $\delta$  = 165.4, 158.7, 137.7, 128.5, 127.8, 127.7, 116.7, 77.6, 73.2, 67.0, 64.2, 39.5, 36.8, 31.5, 25.9, 18.2, 11.5, -5.5.

**IR** (neat,  $\nu/\text{cm}^{-1}$ ): 2953m, 2929m, 2857m, 1718s, 1459w, 1389w, 1249s, 1097s, 1026m, 836s, 777s, 739m, 699m.

**HRMS (ESI):**  $m/z$  calcd for C<sub>23</sub>H<sub>37</sub>O<sub>4</sub>Si [ $M + H$ ]<sup>+</sup>: 405.2456; found: 405.2461.

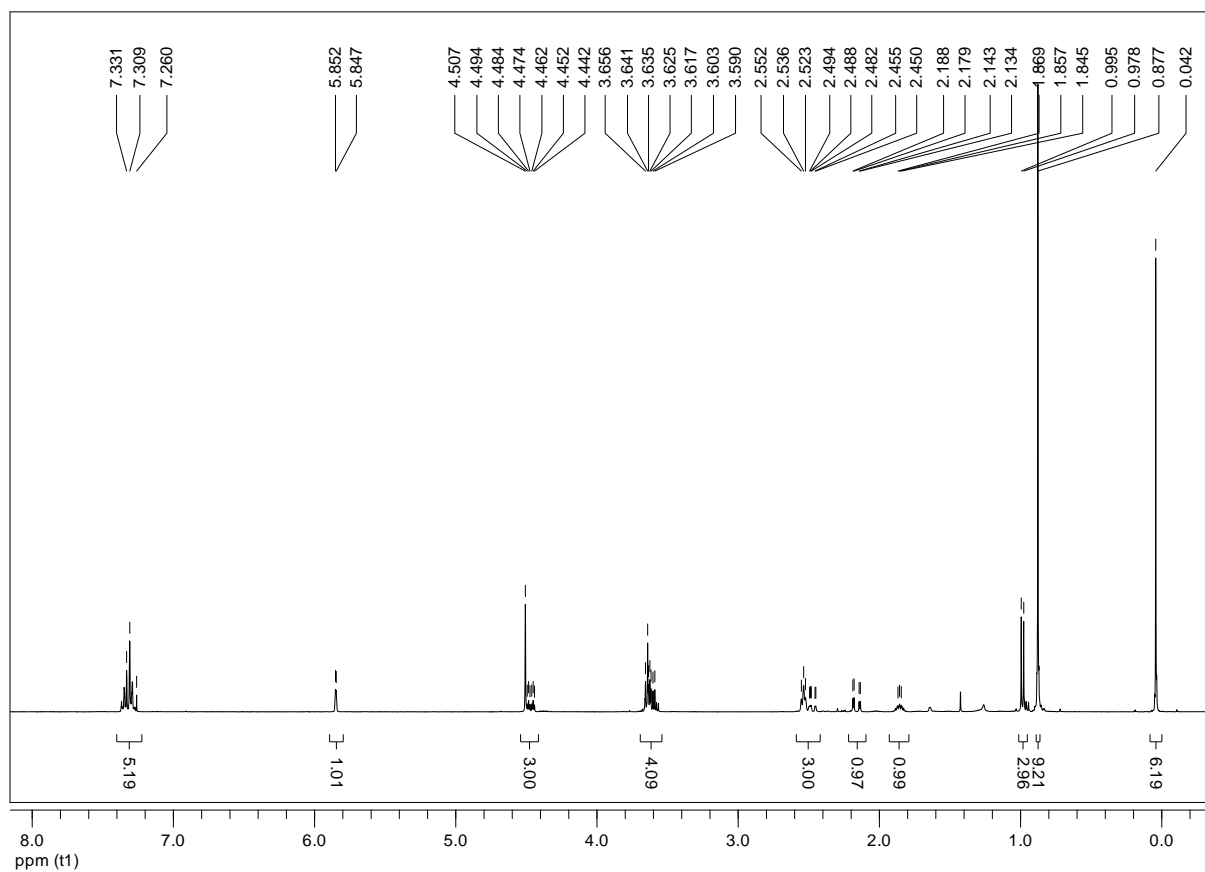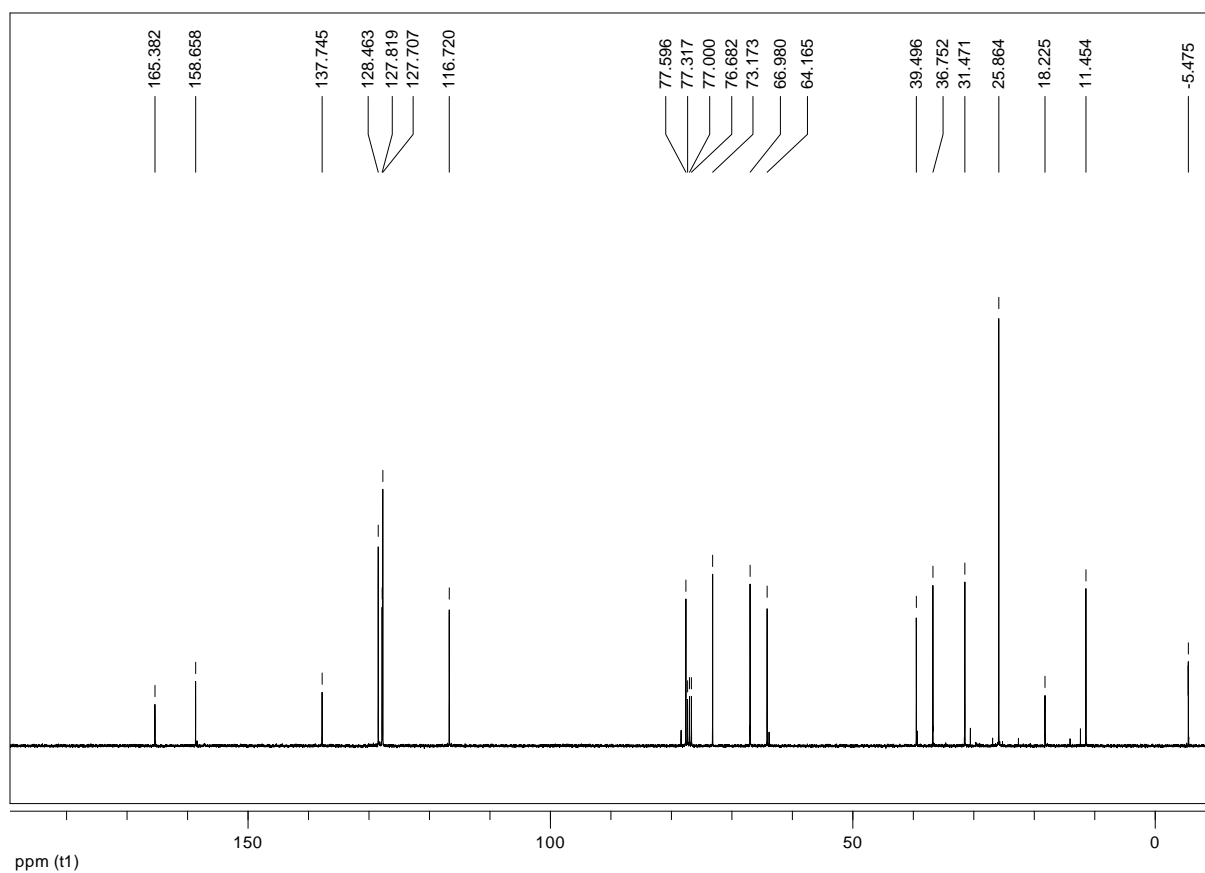

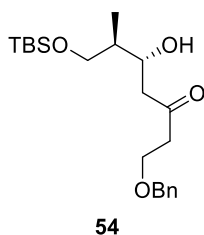

**(5*R*,6*R*)-1-(Benzyloxy)-7-(*tert*-butyldimethylsilyloxy)-5-hydroxy-6-methyl-**

**heptan-3-one (54):** To a solution of **52** (56.6 mg, 0.15 mmol, 1.0 equiv) in dioxane/water (3:1, 1.5 mL) was added at rt OsO<sub>4</sub> (4% aq. solution, 18.3  $\mu$ L, 2 mol%) followed by 2,6-lutidine (34.8  $\mu$ L, 0.30 mmol, 2.0 equiv) and NaIO<sub>4</sub> (128 mg, 0.60 mmol, 4.0 equiv). The brownish reaction mixture was stirred for 2.5 h at rt, quenched with sat. Na<sub>2</sub>S<sub>2</sub>O<sub>3</sub> (6 mL) and diluted with EtOAc (15 mL)/brine (6 mL). The layers were separated and the aqueous layer was extracted with EtOAc (2 x 20 mL). The combined organic extracts were washed with brine, dried over MgSO<sub>4</sub> and the solvent was removed under reduced pressure. The residue was purified by column chromatography (hexane/EtOAc, 4:1  $\rightarrow$  3:1) to afford **54** (53.6 mg, 94%) as a colorless oil.

**R<sub>f</sub>** = 0.39 (hexane/ EtOAc, 3:1)

**[ $\alpha$ ]<sub>D</sub><sup>24</sup>** = +13.2° [*c* = 0.700, CHCl<sub>3</sub>].

**<sup>1</sup>H-NMR** (400.1 MHz, CDCl<sub>3</sub>):  $\delta$  = 7.37-7.24 (m, 5H), 4.51 (s, 2H), 4.27 (mc, 1H), 3.75 (mc, 2H), 3.69 (dd, *J* = 4.4, 9.9 Hz, 1H), 3.62 (dd, *J* = 6.0, 10.0 Hz, 1H), 3.30 (d, *J* = 3.4 Hz, 1H), 2.76 (t, *J* = 6.3 Hz, 2H), 2.70 (dd, *J* = 9.3, 16.5 Hz, 1H), 2.52 (dd, *J* = 3.4, 16.5 Hz, 1H), 1.71 (mc, 1H), 0.91 (d, *J* = 7.1 Hz, 3H), 0.89 (s, 9H), 0.06 (s, 6H).

**<sup>13</sup>C-NMR** (100.6 MHz, CDCl<sub>3</sub>):  $\delta$  = 209.5, 138.0, 128.4, 127.7 (2C), 73.2, 69.8, 66.9, 65.2, 47.7, 43.7, 39.3, 25.9, 18.2, 10.8, -5.5, -5.6.

**IR** (neat,  $\nu$ /cm<sup>-1</sup>): 3484brs, 2954m, 2930m, 2858m, 1712m, 1468w, 1364m, 1254m, 1095s, 1025m, 1008m, 836s, 776s, 739m, 699m.

**HRMS (ESI):** *m/z* calcd for C<sub>21</sub>H<sub>36</sub>NaO<sub>4</sub>Si [*M* + Na]<sup>+</sup>: 403.2275, found: 403.2273.

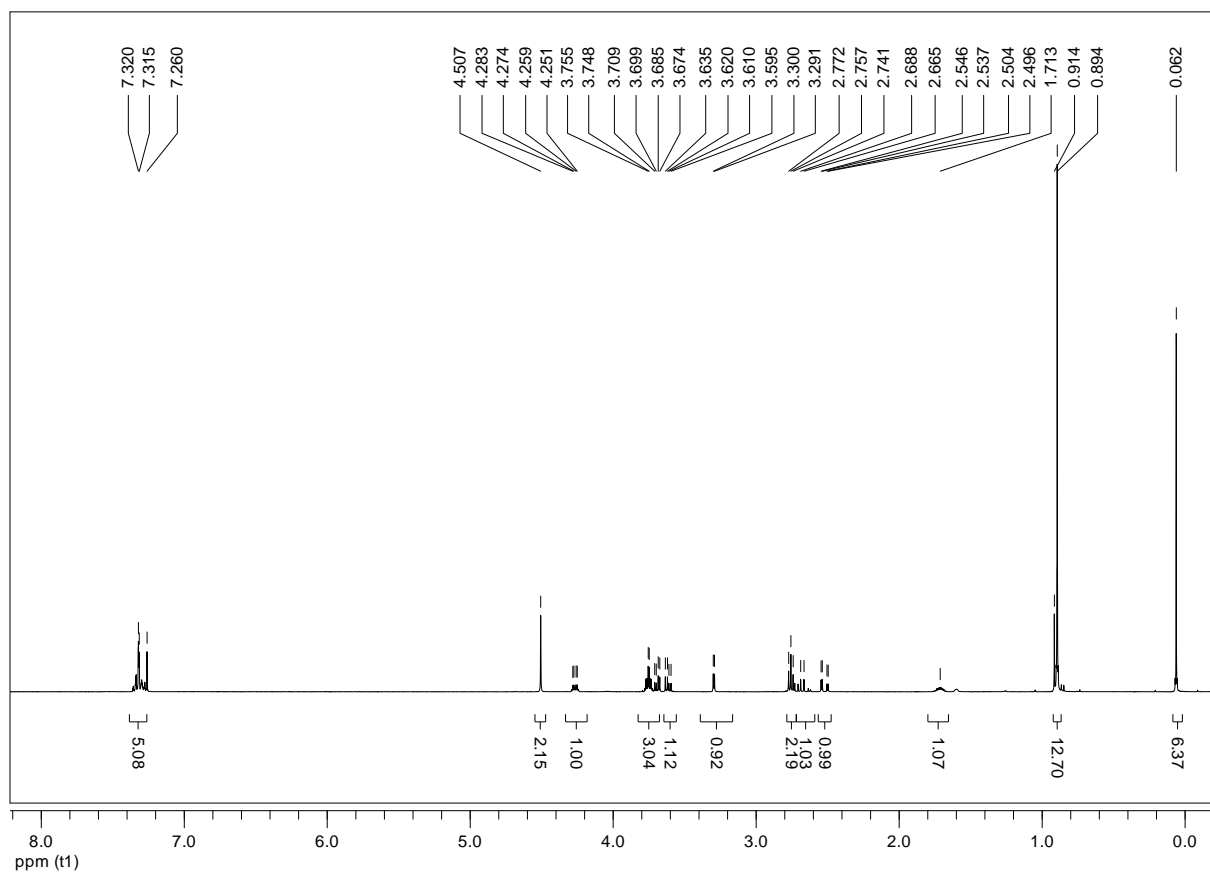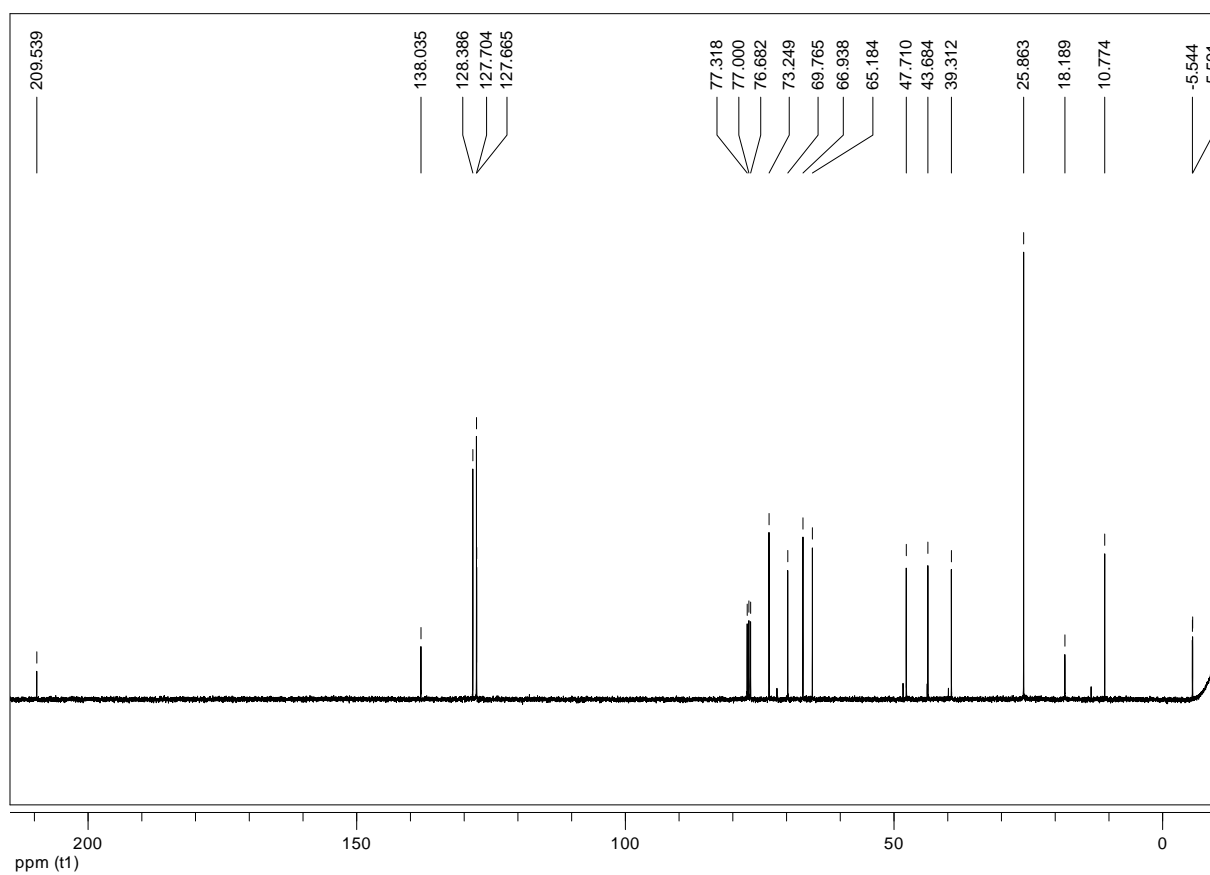

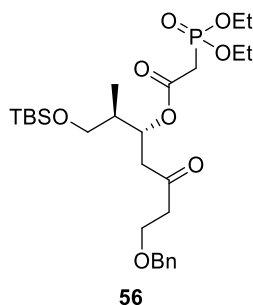

**(2*R*,3*R*)-7-(Benzyloxy)-1-(*tert*-butyldimethylsilyloxy)-2-methyl-5-oxoheptan-3-yl 2-(diethoxyphosphoryl)acetate (**56**):** To a solution of diethylphosphonoacetic acid (**55**) (0.38 mL, 2.36 mmol, 1.5 equiv) in CH<sub>2</sub>Cl<sub>2</sub> (20 mL) over molecular sieves (570 mg powder, 4 Å) was added at 0 °C CME-carbodiimide (1.13 g, 2.68 mmol, 1.7 equiv) in one portion. After stirring the reaction mixture for 10 min at 0 °C, a solution of **54** (599 mg, 1.57 mmol, 1.0 equiv) in CH<sub>2</sub>Cl<sub>2</sub> (19 mL) was added at that temperature. The cooling bath was removed and a catalytic amount of DMAP (19.2 mg, 10 mol%) was added. After stirring for 1 h at rt, the reaction mixture was directly purified by column chromatography (CH<sub>2</sub>Cl<sub>2</sub>, then EtOAc) to afford **56** (818 mg, 93%) as a colorless oil.

**R<sub>f</sub>** = 0.56 (EtOAc)

**[α]<sub>D</sub><sup>24</sup>** = +4.5° [*c* = 0.845, CHCl<sub>3</sub>].

**<sup>1</sup>H-NMR** (400.1 MHz, CDCl<sub>3</sub>): δ = 7.36-7.23 (m, 5H), 5.42 (m<sub>c</sub>, 1H), 4.48 (s, 2H), 4.13 (m<sub>c</sub>, 4H), 3.71 (t, *J* = 6.3 Hz, 2H), 3.50 (dd, *J* = 2.4, 6.0 Hz, 2H), 2.95-2.66 (m, 6H), 1.90 (m<sub>c</sub>, 1H), 1.32 (t, *J* = 7.1 Hz, 6H), 0.91 (d, *J* = 6.9 Hz, 3H), 0.88 (s, 9H), 0.02 (s, 6H).

**<sup>13</sup>C-NMR** (100.6 MHz, CDCl<sub>3</sub>): δ = 205.9, 164.9 (d, *J* = 6.4 Hz), 138.0, 128.3, 127.7, 127.6, 73.2, 72.1, 65.1, 64.4, 62.5 (t, *J* = 6.7 Hz), 45.3, 43.1, 39.0, 34.3 (d, *J* = 134 Hz), 25.8, 18.1, 16.3 (d, *J* = 6.2 Hz), 11.5, -5.5, -5.6.

**<sup>31</sup>P-NMR** (162.0 MHz, CDCl<sub>3</sub>): δ = 19.8.

**IR** (neat, ν/cm<sup>-1</sup>): 2954m, 2931m, 2858m, 1736s, 1469w, 1392w, 1261s, 1210w, 1099s, 1052s, 1025s, 969m, 838s, 777m, 743m, 696w.

**HRMS (ESI):** *m/z* calcd for C<sub>27</sub>H<sub>47</sub>NaO<sub>8</sub>PSi [M + Na]<sup>+</sup>: 581.2670, found: 581.2659.



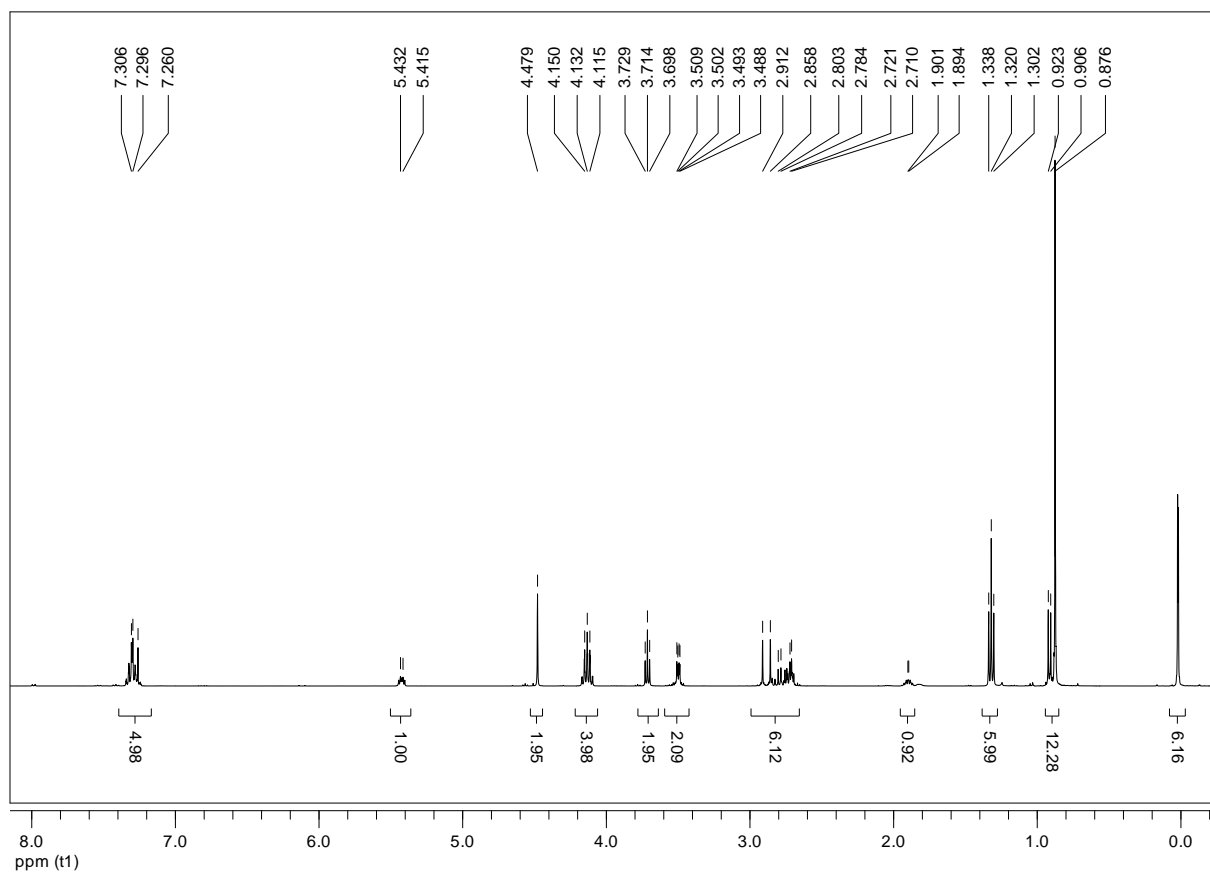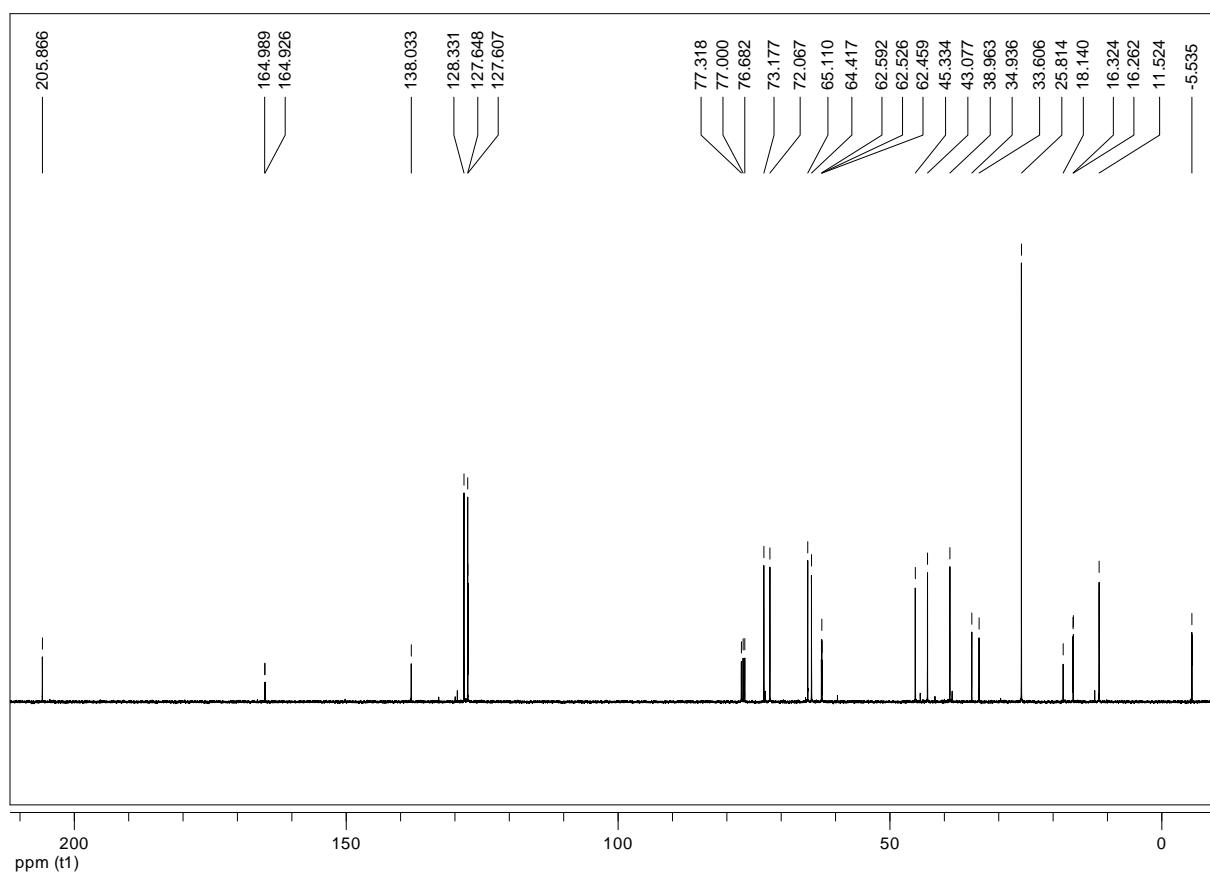

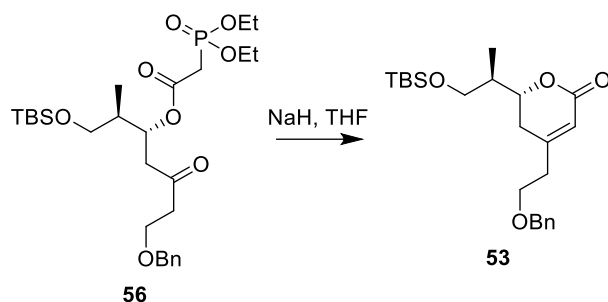

**(R)-4-(2-(Benzyloxy)ethyl)-6-((R)-1-(*tert*-butyldimethylsilyloxy)propan-2-yl)-5,6-dihydro-2H-pyran-2-one (**53**):** To a solution of **56** (38.7 mg, 69.3  $\mu\text{mol}$ , 1.0 equiv) in THF (2.0 mL) was added at 0 °C NaH (1.8 mg, 76.2  $\mu\text{mol}$ , 1.1 equiv) in one portion. After stirring for 45 min at 0 °C, the reaction mixture was quenched with sat  $\text{NH}_4\text{Cl}$  (8 mL) and diluted with  $\text{Et}_2\text{O}$  (10 mL). The layers were separated and the aqueous layer was extracted with  $\text{Et}_2\text{O}$  (2 x 15 mL). The combined organic extracts were dried over  $\text{MgSO}_4$ , filtered and concentrated under reduced pressure. The crude product was purified by column chromatography (hexane/ $\text{EtOAc}$ , 3:1) to give **53** (23.4 mg, 83%) as a colorless oil. The analytical data for **53** were identical to those reported above (*vide supra*).

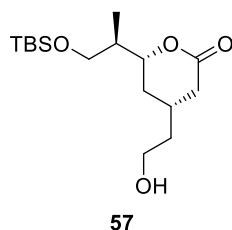

**(4*R*,6*R*)-6-((*R*)-1-(*tert*-butyldimethylsilyloxy)propan-2-yl)-4-(2-hydroxyethyl)-tetrahydro-2*H*-pyran-2-one (57):** To a solution of **53** (4.09 g, 10.1 mmol, 1.0 equiv) in EtOAc (80 mL) was added palladium hydroxide on carbon (360 mg, 5 mol%, 20% wt/wt Pd). The mixture was stirred under a hydrogen atmosphere (9 bar) for 23 h while being monitored by MS and TLC. Then, the heterogeneous suspension was filtered over celite, the solvent was removed under reduced pressure and the residue was purified by column chromatography (hexane/EtOAc, 1:1 → 0:1) to afford **57** (3.14 g, 98%) as a colorless oil.

$R_f$  = 0.21 (hexane/EtOAc, 1:1)

$[\alpha]_D^{24} = -22.5^\circ$  [ $c$  = 0.535, CHCl<sub>3</sub>].

**<sup>1</sup>H-NMR** (400.1 MHz, CDCl<sub>3</sub>):  $\delta$  = 4.45 (td,  $J$  = 3.0, 11.9 Hz, 1H), 3.72 (t,  $J$  = 6.3 Hz, 2H), 3.62 (dd,  $J$  = 7.6, 9.8 Hz, 1H), 3.54 (dd,  $J$  = 5.4, 10.0 Hz, 1H), 2.73 (dd,  $J$  = 5.3, 16.9 Hz, 1H), 2.17 (m<sub>c</sub>, 1H), 2.09 (dd,  $J$  = 10.5, 16.8 Hz, 1H), 1.90 (d,  $J$  = 13.8 Hz, 1H), 1.80 (m<sub>c</sub>, 1H), 1.71-1.49 (m, 2H), 1.38 ( $J$  = 11.9, 25.0 Hz, 1H), 0.93 (d,  $J$  = 6.9 Hz, 3H), 0.88 (s, 9H), 0.04 (s, 6H).

**<sup>13</sup>C-NMR** (100.6 MHz, CDCl<sub>3</sub>):  $\delta$  = 171.6, 80.2, 64.2, 59.7, 40.3, 38.9, 36.4, 32.7, 28.6, 25.9, 18.2, 10.8, -5.5.

**IR** (neat,  $\nu$ /cm<sup>-1</sup>): 3434br, 2953m, 2928m, 2857m, 1720m, 1471w, 1389w, 1250s, 1088m, 1054m, 1006m, 834s, 775s, 668m.

**HRMS (ESI):**  $m/z$  calcd for C<sub>16</sub>H<sub>33</sub>O<sub>4</sub>Si [ $M + H$ ]<sup>+</sup>: 317.2143; found: 317.2143.

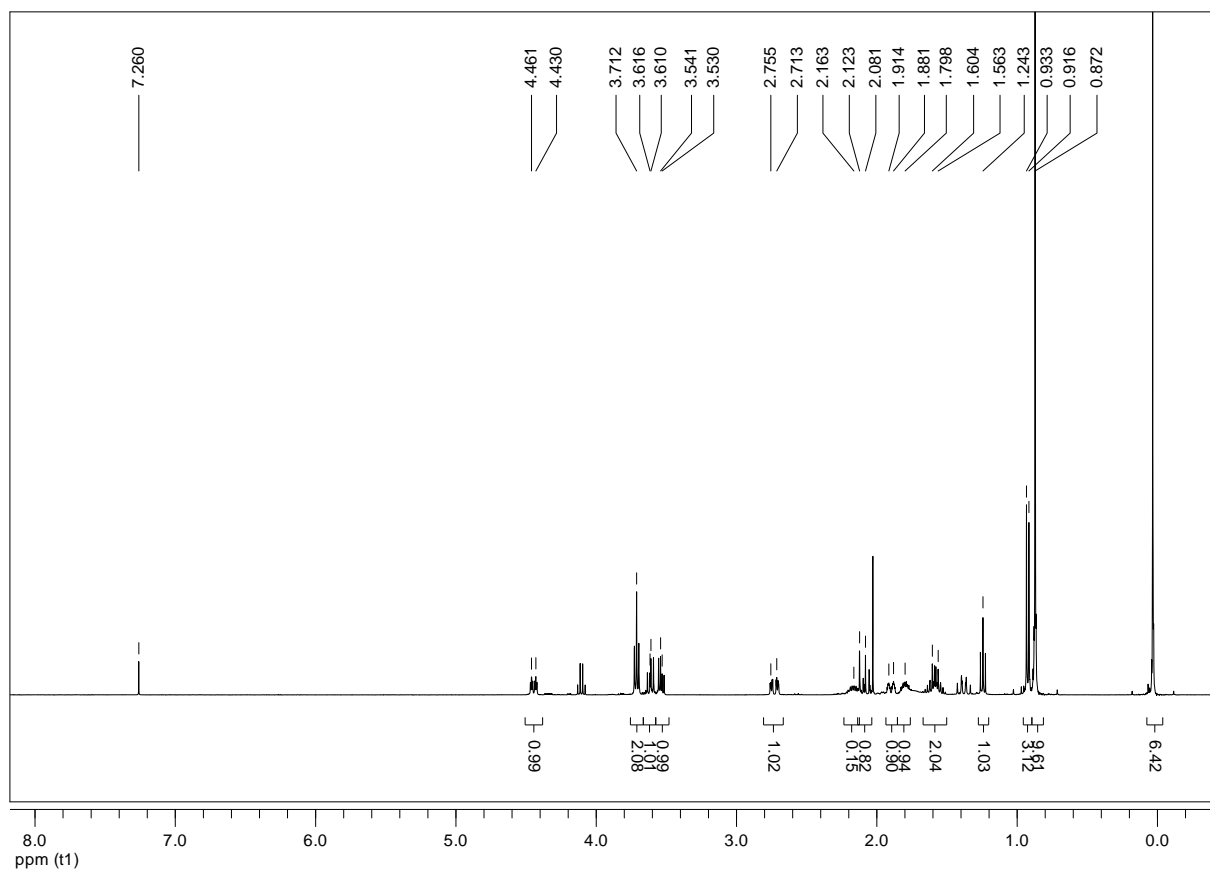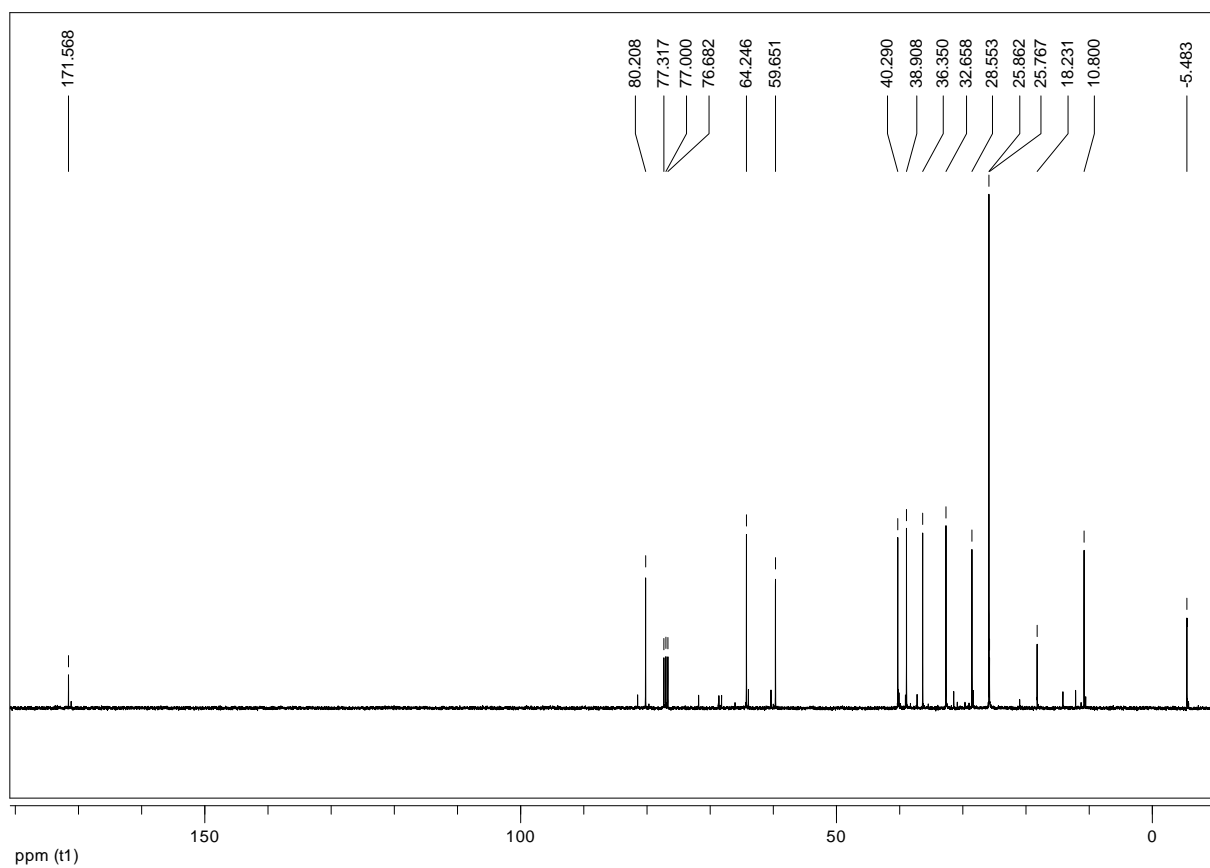

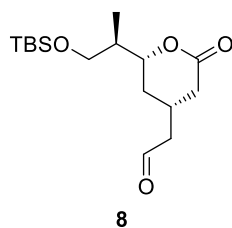

**2-((2R,4S)-2-((R)-1-(tert-butyldimethylsilyloxy)propan-2-yl)-6-oxotetrahydro-2H-pyran-4-yl)acetaldehyde (**8**):** To a solution of oxalyl chloride (0.21 mL, 2.46 mmol, 1.5 equiv) in CH<sub>2</sub>Cl<sub>2</sub> (23 mL) at –78 °C was added dropwise a solution of DMSO (0.35 mL, 4.92 mmol, 3.0 equiv) in CH<sub>2</sub>Cl<sub>2</sub> (0.5 mL). After stirring at –78 °C for 10 min, a solution of **57** (519 mg, 1.64 mmol, 1.0 equiv) in CH<sub>2</sub>Cl<sub>2</sub> (5 mL) was added dropwise. The resultant cloudy mixture was stirred at –78 °C for 1 h, and then TEA (0.91 mL, 6.56 mmol, 4.0 equiv) was added slowly and the reaction mixture was allowed to warm to room temperature (1 h). The reaction was quenched with water (20 mL), and the layers were separated. The aqueous phase was extracted with CH<sub>2</sub>Cl<sub>2</sub> (3 x 20 mL) and the combined organic phases were washed with brine, dried over MgSO<sub>4</sub>, filtered and concentrated *in vacuo*. The crude product was purified by column chromatography (hexane/EtOAc, 2:1) to afford **8** (483 mg, 94%) as a colorless oil.

**R<sub>f</sub>** = 0.52 (hexane/EtOAc, 1:1)

**[α]<sub>D</sub><sup>24</sup>** = –27.5° [*c* = 0.525, CHCl<sub>3</sub>].

**<sup>1</sup>H-NMR** (400.1 MHz, CDCl<sub>3</sub>): δ = 9.77(t, *J* = 1.0 Hz, 1H), 4.48(ddd, *J* = 3.0, 3.5, 12.0 Hz, 1H), 3.61(dd, *J* = 7.4, 10.0 Hz, 1H), 3.54(dd, *J* = 5.4, 1.0 Hz, 1H), 2.78(ddd, *J* = 1.7, 6.0, 17.6 Hz, 1H), 2.64-2.48(m, 3H), 2.10(dd, *J* = 9.8, 17.5 Hz, 1H), 1.94(m<sub>c</sub>, 1H), 1.80(m<sub>c</sub>, 1H), 1.40(m<sub>c</sub>, 1H), 0.92(d, *J* = 6.9 Hz, 3H), 0.88(s, 9H), 0.04(s, 6H).

**<sup>13</sup>C-NMR** (100.6 MHz, CDCl<sub>3</sub>): δ = 199.6, 170.6, 79.9, 64.1, 49.9, 40.2, 35.9, 32.3, 26.2, 25.9, 18.2, 10.8, –5.5.

**IR** (neat, ν/cm<sup>–1</sup>): 2954m, 2928m, 2857m, 1725s, 1471m, 1388m, 1361w, 1248s, 1080m, 1005m, 921w, 835s, 776s, 668m.

**HRMS (ESI):** *m/z* calcd for C<sub>16</sub>H<sub>30</sub>NaO<sub>4</sub>Si [*M* + Na]<sup>+</sup>: 337.1806, found: 337.1821.

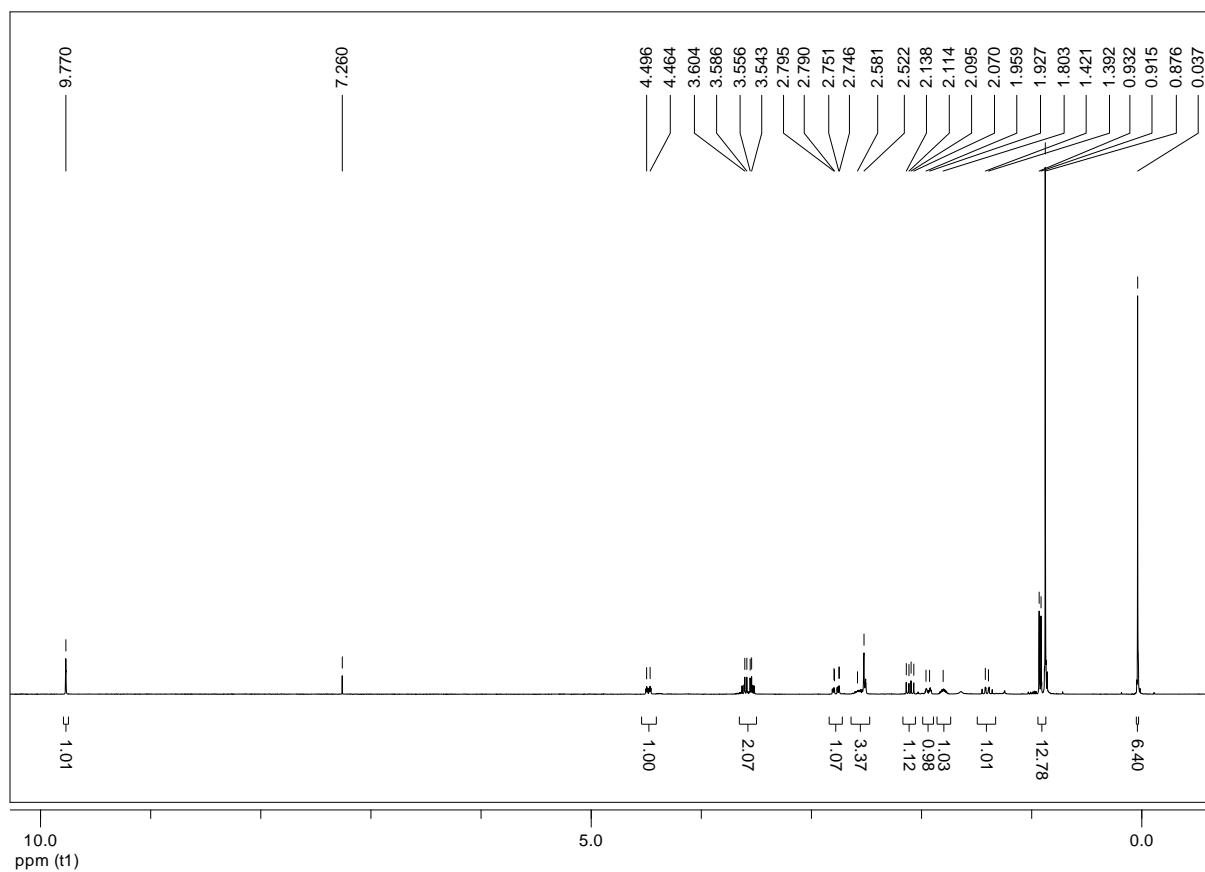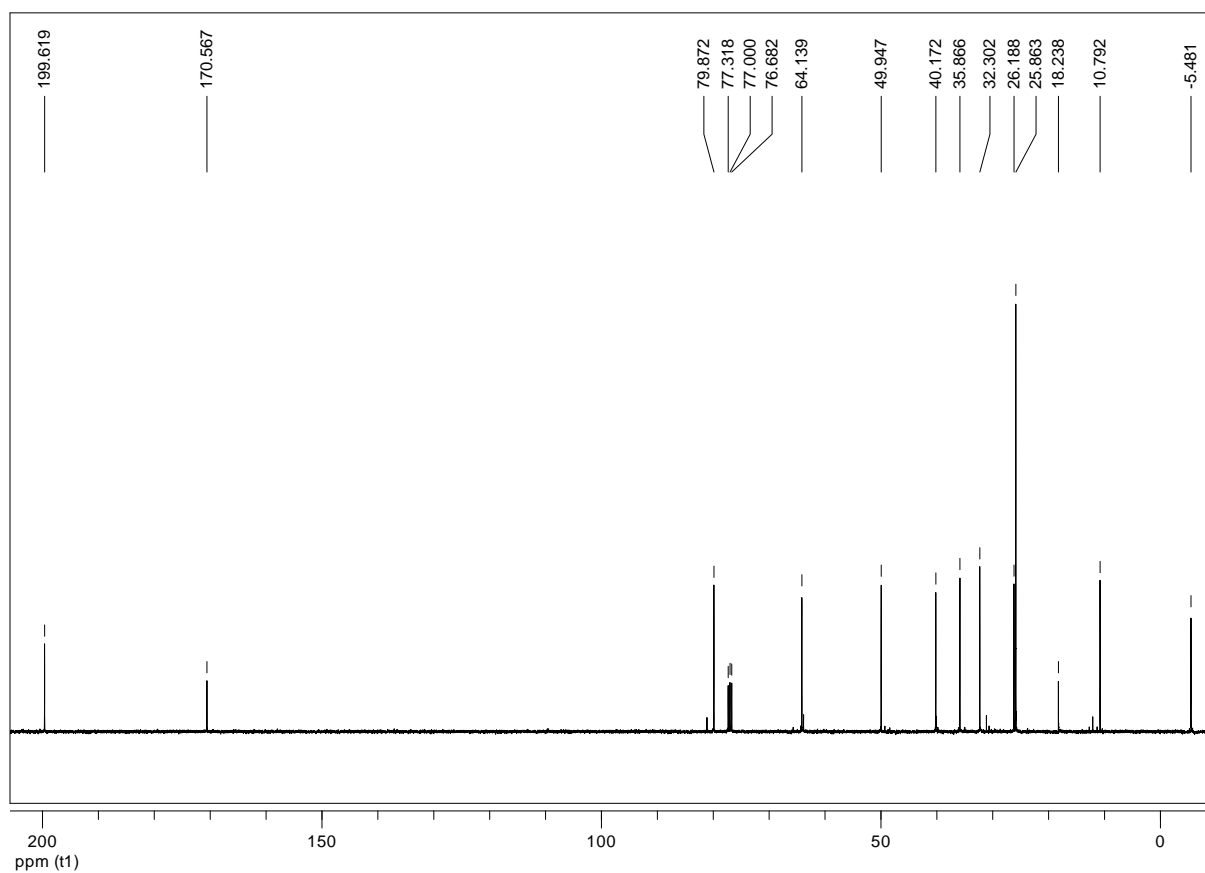

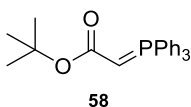

***tert*-Butyl 2-(triphenyl-15-phosphaneylidene)acetate (58):** To a stirred solution of triphenylphosphine (9.90 g, 37.7 mmol, 1.0 equiv) in toluene (22 mL) was added dropwise at 0 °C *tert*-butyl bromoacetate (5.50 mL, 37.7 mmol, 1.0 equiv). The reaction mixture was allowed to warm to rt and stirring was continued over night. The colorless precipitate was filtered off, washed with pentane (2 x 25 mL) and dried under high vacuum to afford the phosphonium salt as a colorless solid (16.1 g, 93%).

This salt was dissolved in water (300 mL) and the solution was washed with Et<sub>2</sub>O (60 mL). The aqueous layer was separated and phenolphthalein (6 mg) was added. The homogeneous solution was cooled to 0 °C and aq. NaOH (at the beginning 8 mL of a 4 M solution, then 1 M solution) was added dropwise until the pink color persisted. Unfortunately, the ylide did not precipitate due to small amounts of Et<sub>2</sub>O present, and subsequent filtration failed. Therefore, the aqueous solution was extracted with CH<sub>2</sub>Cl<sub>2</sub> (3 x 100 mL) and the combined organic extracts were dried over MgSO<sub>4</sub>, filtered and concentrated under reduced pressure. After drying under high vacuum, a gummy resin was formed, which did not solidify (13.4 g). This residue was dissolved in MeOH (30 mL) and water (70 mL) was added quickly to this vigorously stirred solution, which led to immediate precipitation of the ylide. This heterogeneous solution was stored in the fridge for 3 h, filtered and washed repeatedly with cold water (0 °C, 5 x 20 mL). After drying under high vacuum, **58** (12.5 g, 95%) was obtained as a colorless solid.<sup>14</sup>

**<sup>1</sup>H-NMR** (400.1 MHz, CDCl<sub>3</sub>): δ = 7.74-7.58 (m, 6H), 7.57-7.48 (m, 3H), 7.48-7.35 (m, 6H), 2.67 (br s, 1H), 1.20 (br s, 9H).

<sup>14</sup> The procedure of Cabral dos Santos *et al.* had to be modified due to difficulties with the precipitation of **58** (*vide supra*): Cabral dos Santos, L. *et al. Heterocycles* **2007**, 73, 751-768.

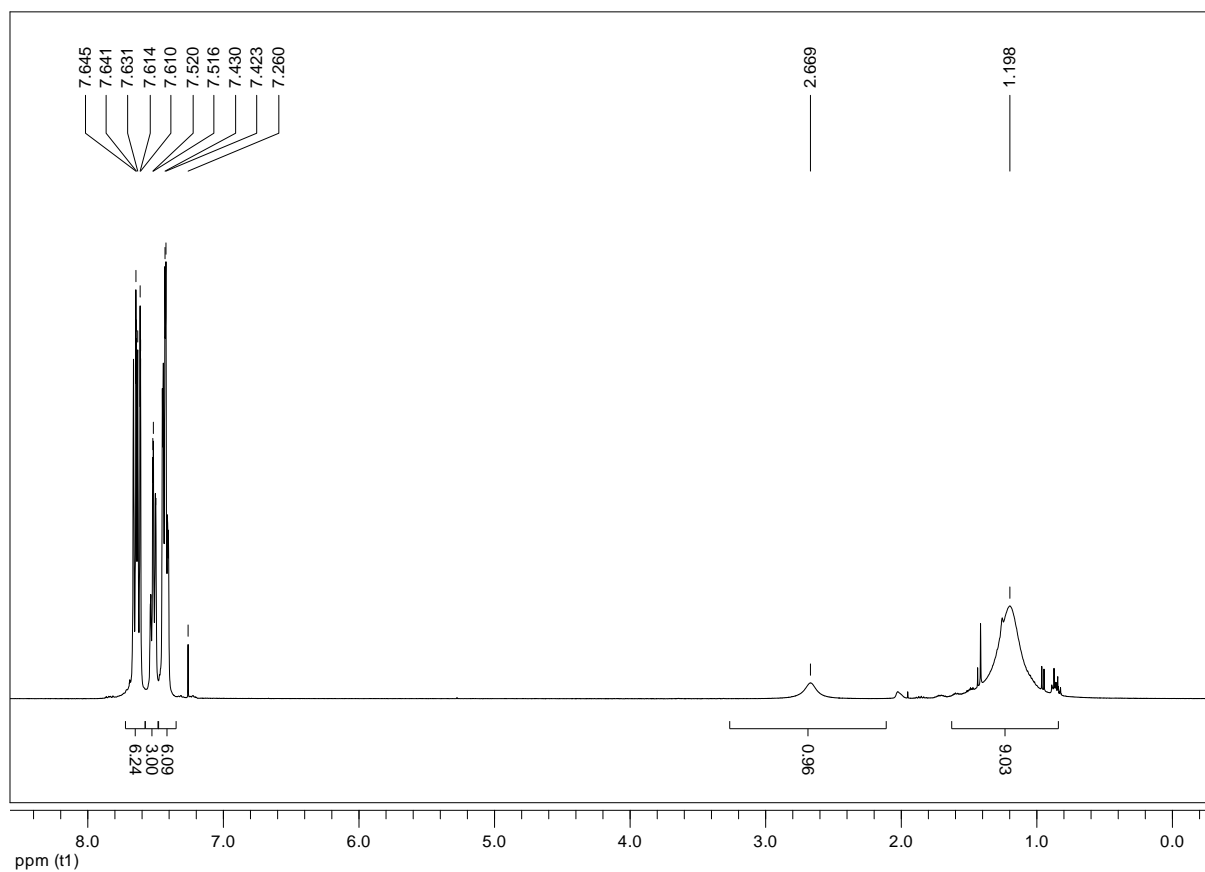



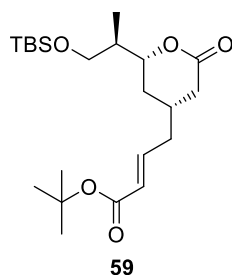

***tert*-Butyl (*E*)-4-((2*R*,4*R*)-2-((*R*)-1-(*tert*-butyldimethylsilyloxy)propan-2-yl)-6-oxotetrahydro-2*H*-pyran-4-yl)but-2-enoate (**59**):** To a solution of **8** (73 mg, 0.23 mmol, 1.0 equiv) in CH<sub>2</sub>Cl<sub>2</sub> (2.3 mL) was added 0 °C the ylide **57**<sup>14</sup> (113 mg, 0.30 mmol, 1.3 equiv). After stirring for 30 min at that temperature, the reaction mixture was allowed to warm to rt and was concentrated under reduced pressure. The residue was purified by column chromatography (hexane/EtOAc, 6:1 → 5:1) to give **59** as a colorless oil (84.4 mg, 84%).

**R<sub>f</sub>** = 0.32 (hexane/EtOAc, 3:1)

**[α]<sub>D</sub><sup>24</sup>** = −16.0° [*c* = 0.904, CHCl<sub>3</sub>].

**<sup>1</sup>H-NMR** (400.1 MHz, CDCl<sub>3</sub>): δ = 6.75 (td, *J* = 7.3, 15.5 Hz, 1H), 5.79 (d, *J* = 15.6 Hz, 1H), 4.43 (td, *J* = 3.3, 11.9 Hz, 1H), 3.61 (dd, *J* = 7.4, 10.0 Hz, 1H), 3.54 (dd, *J* = 5.3, 10.0 Hz, 1H), 2.70 (m<sub>c</sub>, 1H), 2.28-2.03 (m, 4H), 1.89 (m<sub>c</sub>, 1H), 1.80 (m<sub>c</sub>, 1H), 1.48 (s, 9H), 1.36 (m<sub>c</sub>, 1H), 0.93 (d, *J* = 6.9 Hz, 3H), 0.88 (s, 9H), 0.04 (s, 6H).

**<sup>13</sup>C-NMR** (100.6 MHz, CDCl<sub>3</sub>): δ = 170.9, 165.4, 143.1, 125.8, 80.5, 80.1, 64.2, 40.3, 38.6, 36.1, 32.3, 31.2, 28.1, 25.9, 18.2, 10.9, −5.5.

**IR** (neat, ν/cm<sup>−1</sup>): 2955m, 2929m, 2857w, 1733m, 1712m, 1654w, 1472w, 1367m, 1249m, 1150s, 1082m, 1027m, 980m, 835s, 775s, 754m, 669m.

**HRMS (ESI):** *m/z* calcd for C<sub>22</sub>H<sub>44</sub>NO<sub>5</sub>Si [*M* + NH<sub>4</sub>]<sup>+</sup>: 430.2983, found: 430.2982.

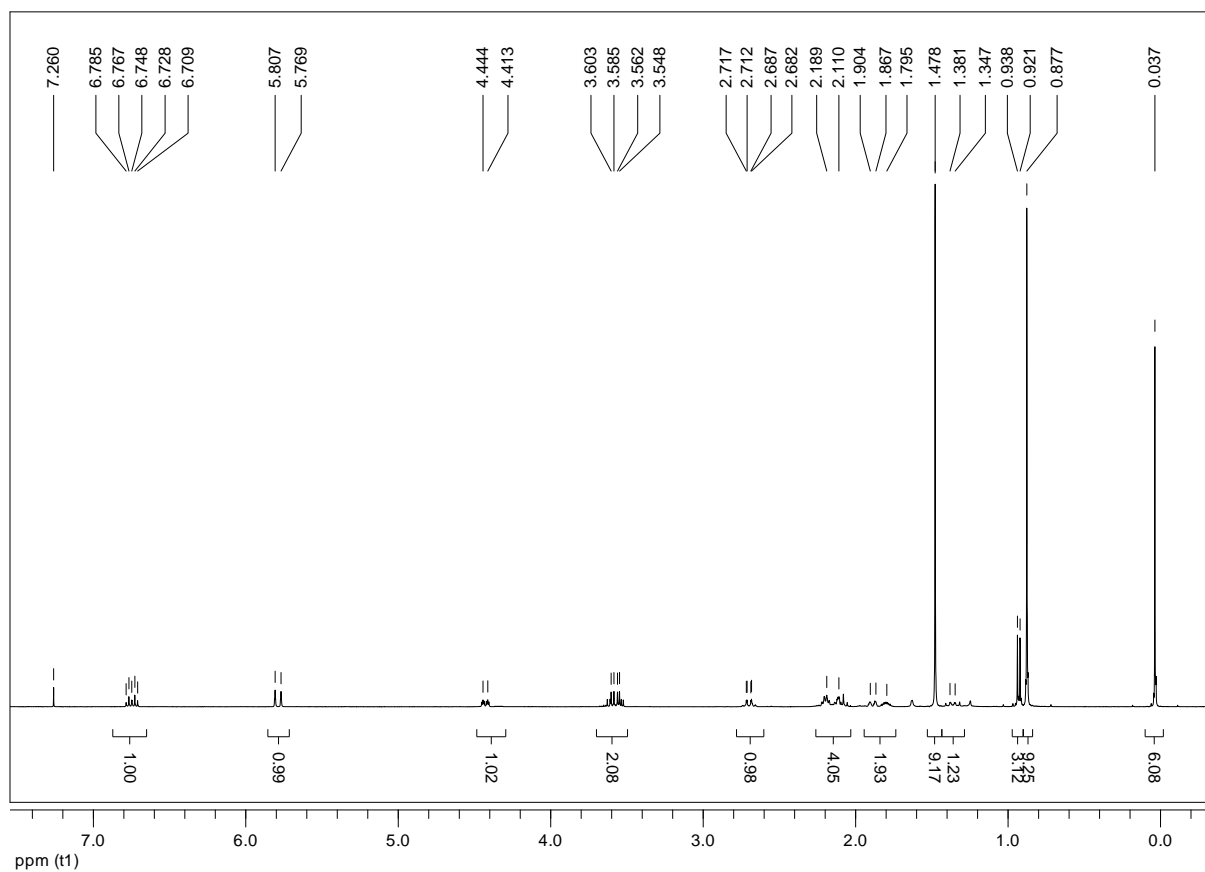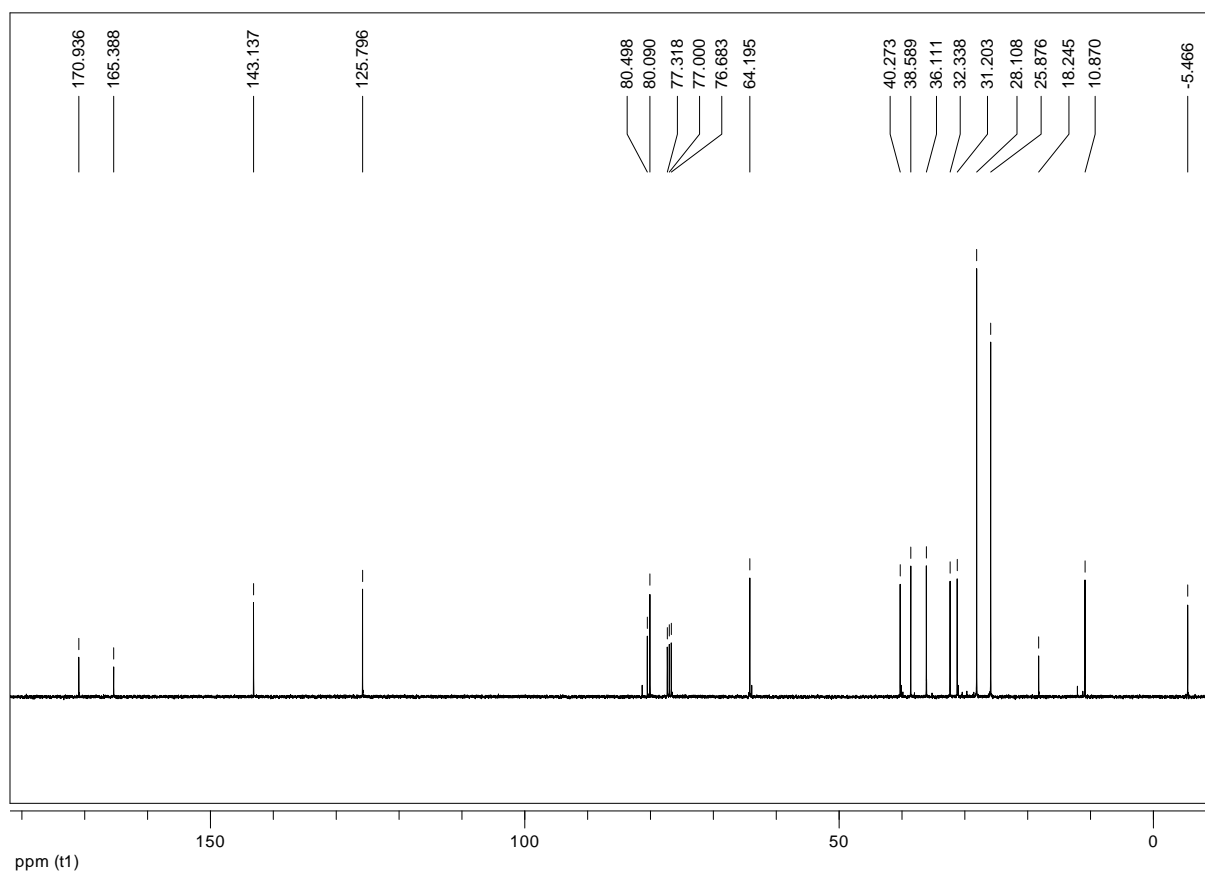

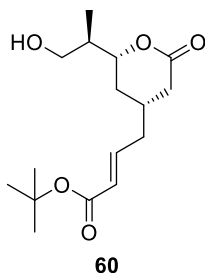

***tert*-Butyl (*E*)-4-((2*R*,4*R*)-2-((*R*)-1-hydroxypropan-2-yl)-6-oxotetrahydro-2H-pyran-4-yl)but-2-enoate (**60**):** To a solution of **59** (79.9 mg, 0.19 mmol, 1.0 equiv) in THF (1.9 mL) was added at 0 °C TBAF (0.77 mL, 0.77 mmol, 4.0 equiv, 1.0 M in THF) and AcOH (44 µL, 0.77 mmol, 4.0 equiv). After stirring for 18 h at rt, the reaction mixture was quenched with sat. NH<sub>4</sub>Cl (10 mL), the aqueous layer was extracted with EtOAc (3 x 15 mL). The combined organic extracts were washed with brine, dried over MgSO<sub>4</sub> and the solvent was removed under reduced pressure. The residue was purified by column chromatography (hexane/EtOAc, 1:1 → 1:2 → 0:1) to give **60** (57.2 mg, 96%) as a colorless oil.

**R<sub>f</sub>** = 0.54 (EtOAc)

**[α]<sub>D</sub><sup>24</sup>** = −12.9° [*c* = 0.524, CHCl<sub>3</sub>]

**<sup>1</sup>H-NMR** (400.1 MHz, CDCl<sub>3</sub>): δ = 6.74 (td, *J* = 7.3, 15.5 Hz, 1H), 5.79 (td, *J* = 1.2, 15.4 Hz, 1H), 4.52 (td, *J* = 3.0, 12.0 Hz, 1H), 3.70 (dd, *J* = 7.8, 10.7 Hz, 1H), 3.61 (dd, *J* = 5.3, 10.7 Hz, 1H), 2.71 (m<sub>c</sub>, 1H), 2.27-2.08 (m, 4H), 1.93-1.82 (m, 2H), 1.48 (s, 9H), 1.45-1.29 (m, 1H), 0.96 (d, *J* = 7.0 Hz, 3H).

**<sup>13</sup>C-NMR** (100.6 MHz, CDCl<sub>3</sub>): δ = 170.9, 165.4, 143.0, 125.8, 80.6, 80.1, 64.2, 40.3, 38.5, 36.1, 32.1, 31.2, 28.1, 10.5.

**IR** (neat, ν/cm<sup>−1</sup>): 3451br, 2975m, 2930m, 2885m, 1709s, 1653m, 1457w, 1391m, 1367m, 1332m, 1313m, 1294m, 1250s, 1151s, 1034m, 988m, 850w.

**HRMS (ESI):** *m/z* calcd for C<sub>16</sub>H<sub>30</sub>NO<sub>5</sub> [M + NH<sub>4</sub>]<sup>+</sup>: 316.2118, found: 316.2115.

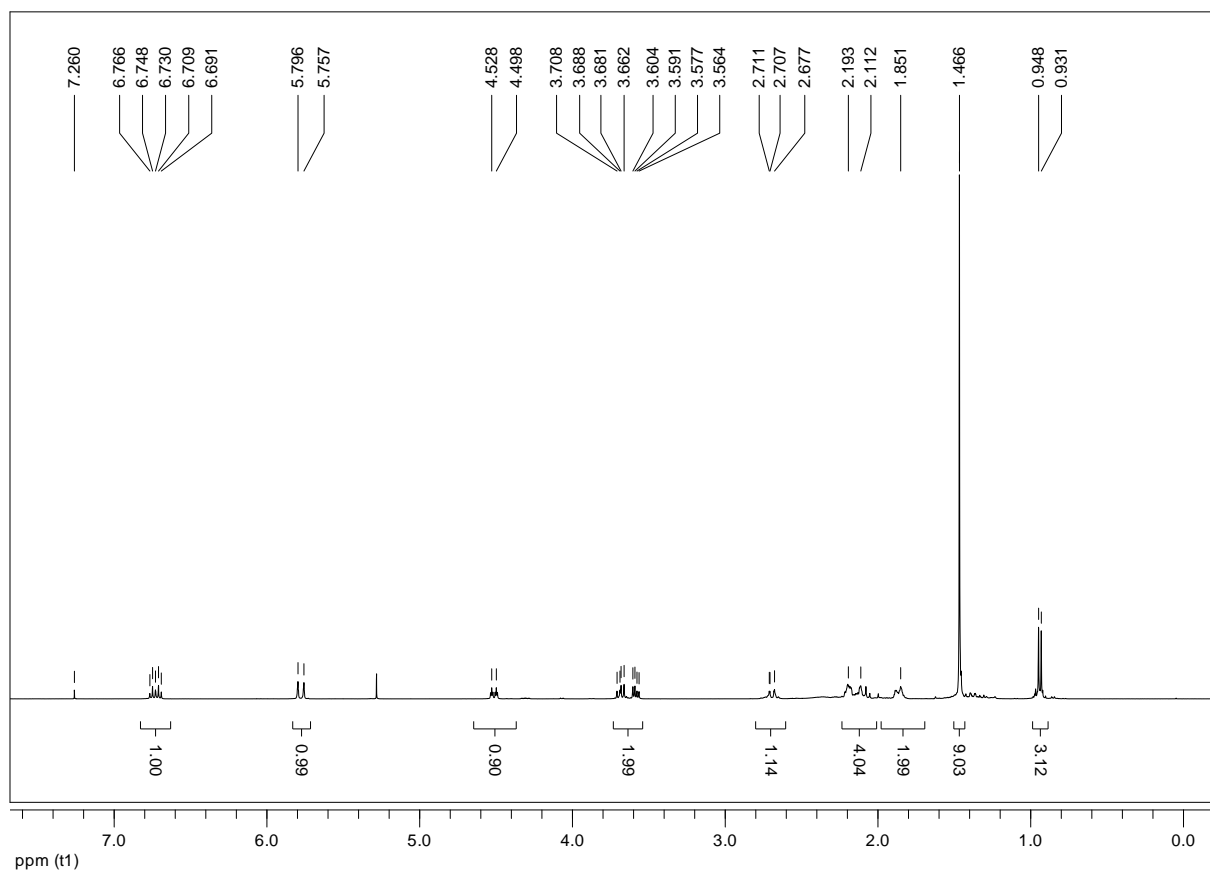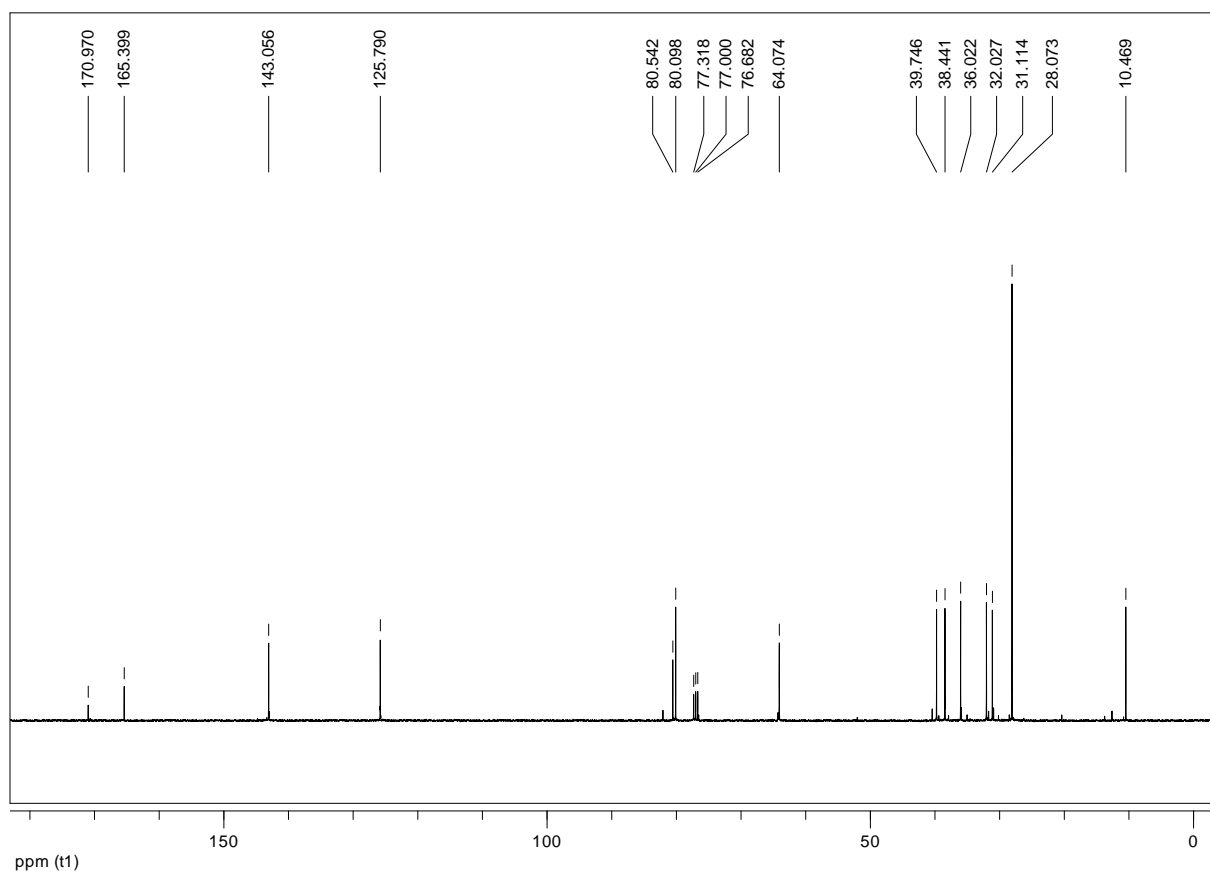

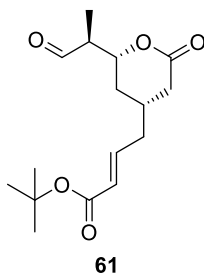

***tert*-Butyl (*E*)-4-((4*R*,6*R*)-2-oxo-6-((*S*)-1-oxopropan-2-yl)tetrahydro-2*H*-pyran-4-yl)but-2-enoate (**61**):** To a solution of **60** (442 mg, 1.48 mmol, 1.0 equiv) in CH<sub>2</sub>Cl<sub>2</sub> (30 mL) was added at 0 °C *Dess-Martin* periodinane (754 mg, 1.78 mmol, 1.2 equiv) in one portion. After stirring for 2 h at rt, sat. Na<sub>2</sub>S<sub>2</sub>O<sub>3</sub> (30 mL), sat. NaHCO<sub>3</sub> (30 mL) and Et<sub>2</sub>O (150 mL) were added at rt to the reaction mixture. The layers were separated and the aqueous layer was extracted with Et<sub>2</sub>O (50 mL). The combined organic extracts were washed with sat. NaHCO<sub>3</sub> (30 mL) and brine, dried over MgSO<sub>4</sub>, filtered and concentrated under reduced pressure. The crude product **140** (514 mg, containing residual solvent) was used for the next step without further purification.

**R<sub>f</sub>** = 0.75 (EtOAc).

**<sup>1</sup>H-NMR** (400.1 MHz, CDCl<sub>3</sub>): δ = 9.73 (d, *J* = 0.9 Hz, 1H), 6.73 (td, *J* = 7.2, 15.5 Hz, 1H), 5.80 (d, *J* = 15.6 Hz, 1H), 4.70 (ddd, *J* = 2.9, 4.7, 12.0 Hz, 1H), 2.74 (m<sub>c</sub>, 1H), 2.62 (m<sub>c</sub>, 1H), 2.29-2.06 (m, 4H), 1.99 (m<sub>c</sub>, 1H), 1.48 (s, 9H), 1.34 (m<sub>c</sub>, 1H), 1.24 (d, *J* = 7.3 Hz, 3H).

**<sup>13</sup>C-NMR** (100.6 MHz, CDCl<sub>3</sub>): δ = 201.7, 169.8, 165.3, 142.6, 126.1, 80.7, 78.8, 50.2, 38.3, 35.9, 32.0, 31.0, 28.1, 8.6.

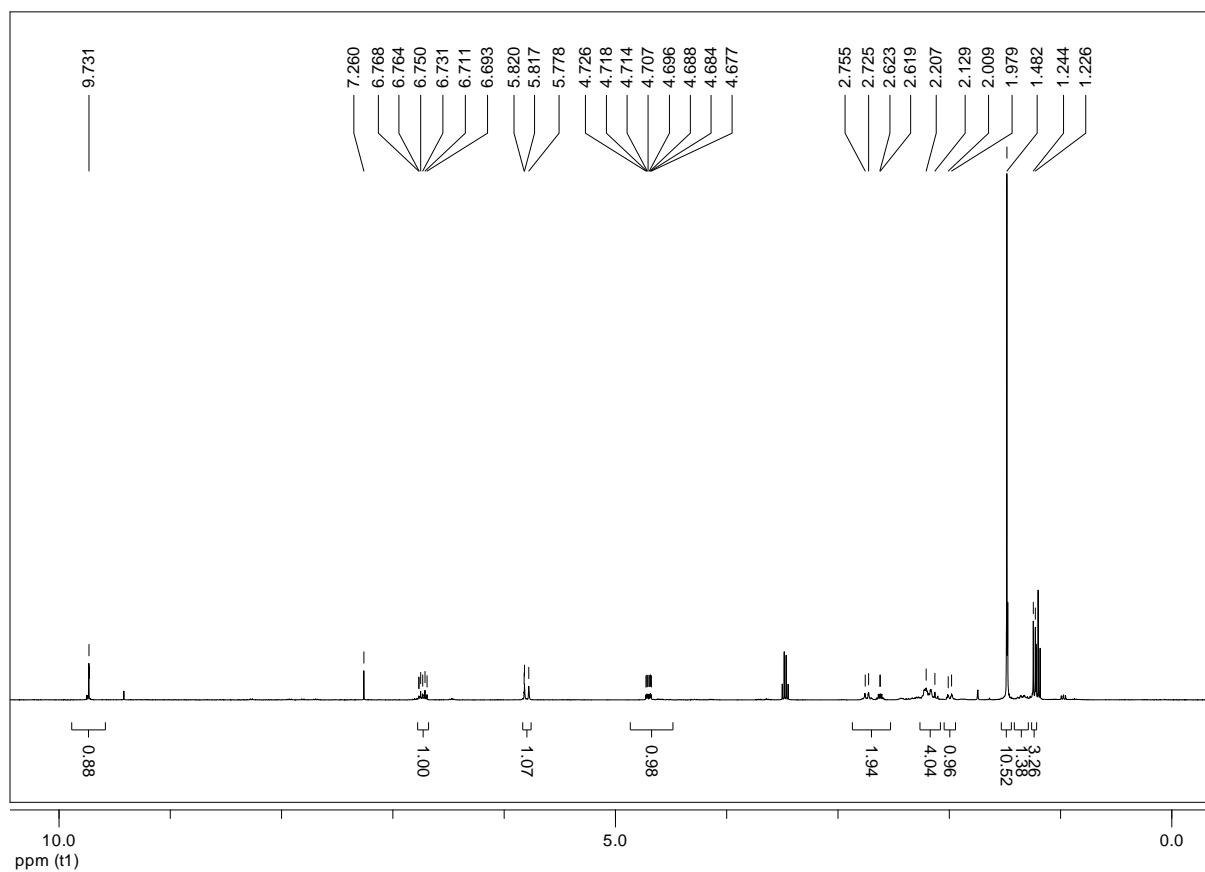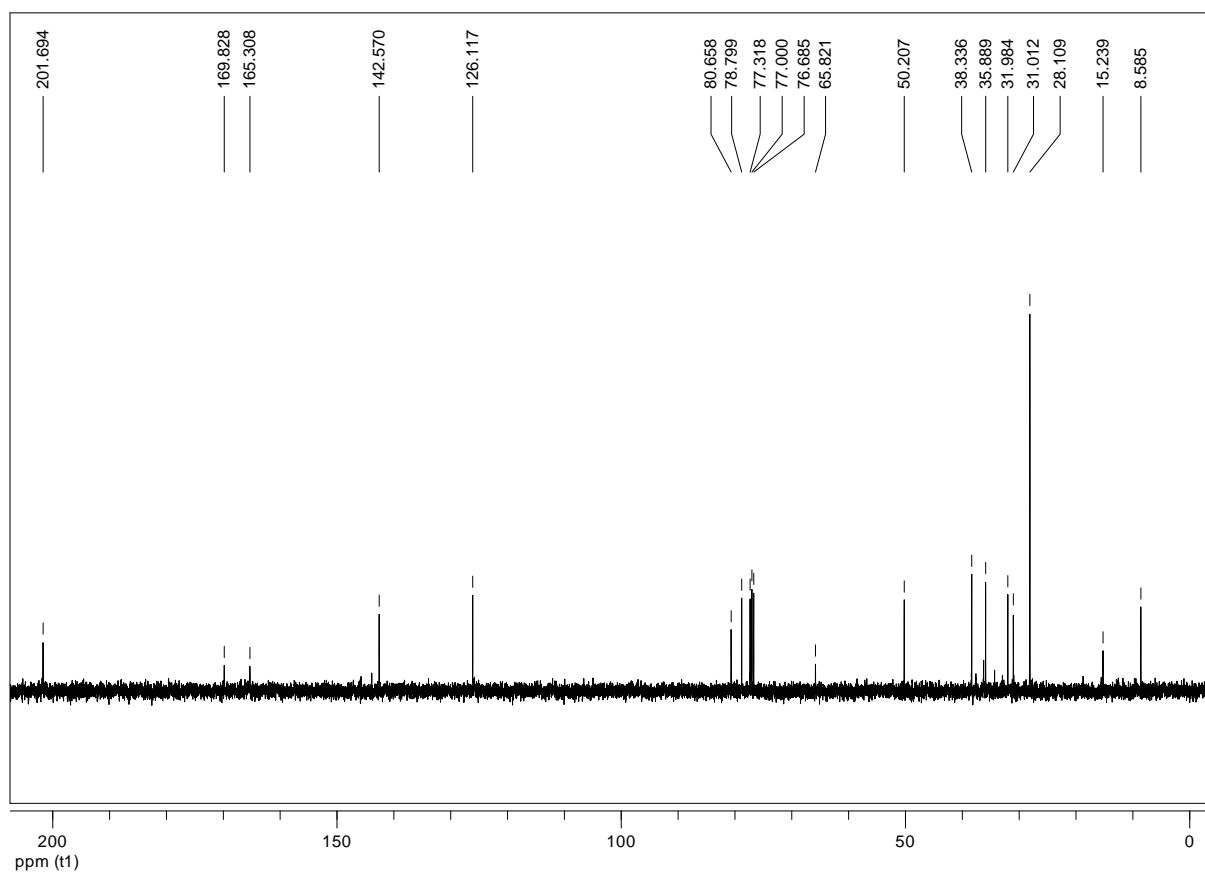

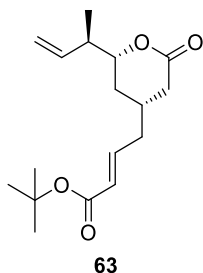

**tert-Butyl (E)-4-((2R,4R)-2-((R)-but-3-en-2-yl)-6-oxotetrahydro-2H-pyran-4-yl)but-2-enoate (**63**):** To a solution of **61** (439 mg, 1.48 mmol, 1.0 equiv) and the *Julia* PT sulfone **62**<sup>15</sup> (432 mg, 1.93 mmol, 1.3 equiv) in THF (15 mL) was added at  $-78^{\circ}\text{C}$  solid NaHMDS (353 mg, 1.93 mmol, 1.3 equiv). After stirring the yellowish solution at  $-78^{\circ}\text{C}$  for 2 h, the reaction mixture was allowed to warm to rt over 2 h. A pH7 buffer solution (20 mL) was added at  $0^{\circ}\text{C}$  and the mixture was diluted with Et<sub>2</sub>O (40 mL). The layers were separated and the aqueous layer was extracted with Et<sub>2</sub>O (2 x 30 mL). The combined organic extracts were washed with brine, dried over MgSO<sub>4</sub>, filtered and concentrated under reduced pressure. The crude product was purified by column chromatography (hexane/EtOAc, 3:1) to afford **63** (294 mg) as a mixture with the *Julia* PT sulfone **62** (204 mg) (38% yield of **63**).

**R<sub>f</sub>** = 0.29 (hexane/EtOAc, 3:1)

**<sup>1</sup>H-NMR** (400.1 MHz, CDCl<sub>3</sub>):  $\delta$  = 6.71 (td,  $J$  = 7.3, 15.5 Hz, 1H), 5.81-5.67 (m, 2H), 5.13-5.04 (m, 2H), 4.11 (ddd,  $J$  = 2.8, 6.2, 11.6 Hz, 1H), 2.66 (m<sub>c</sub>, 1H), 2.42 (m<sub>c</sub>, 1H), 2.26-2.13 (m, 2H), 2.12-1.98 (m, 2H), 1.93 (d,  $J$  = 13.0 Hz, 1H), 1.45 (s, 9H), 1.27-1.12 (m, 1H), 1.08 (d,  $J$  = 6.8 Hz, 3H).

**<sup>13</sup>C-NMR** (100.6 MHz, CDCl<sub>3</sub>):  $\delta$  = 170.6, 165.3, 143.0, 138.4, 125.7, 116.3, 83.1, 80.4, 42.5, 38.4, 35.9, 31.7, 30.8, 28.0, 15.1.

**HRMS (ESI):**  $m/z$  calcd for C<sub>17</sub>H<sub>30</sub>NO<sub>4</sub> [ $M + \text{NH}_4$ ]<sup>+</sup>: 312.2169, found: 312.2166.

<sup>15</sup> *Julia* PT sulfone **62** was prepared according to: Lebrun, M.-E.; Le Marquand, P.; Berthelette, C. *J. Org. Chem.* **2006**, *71*, 2009-2013. See below for the experimental procedure.

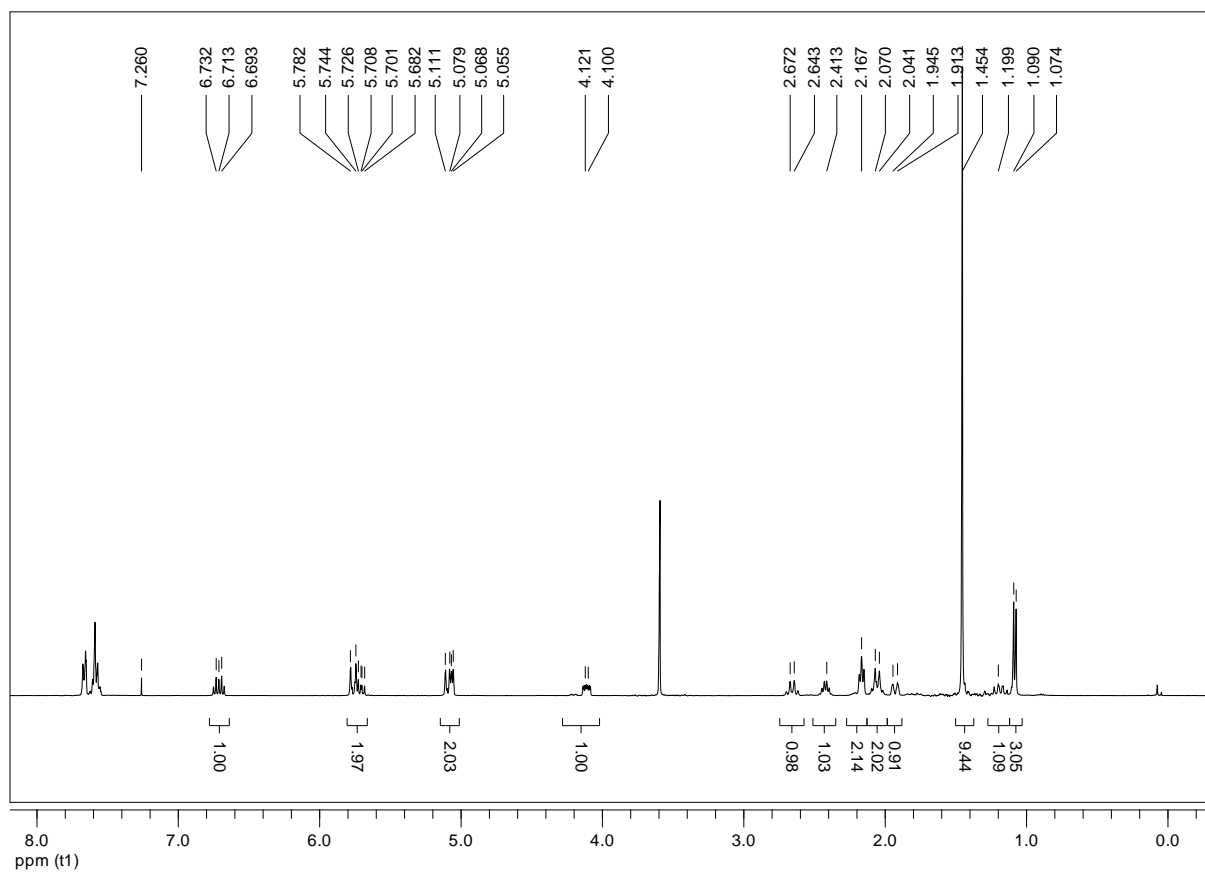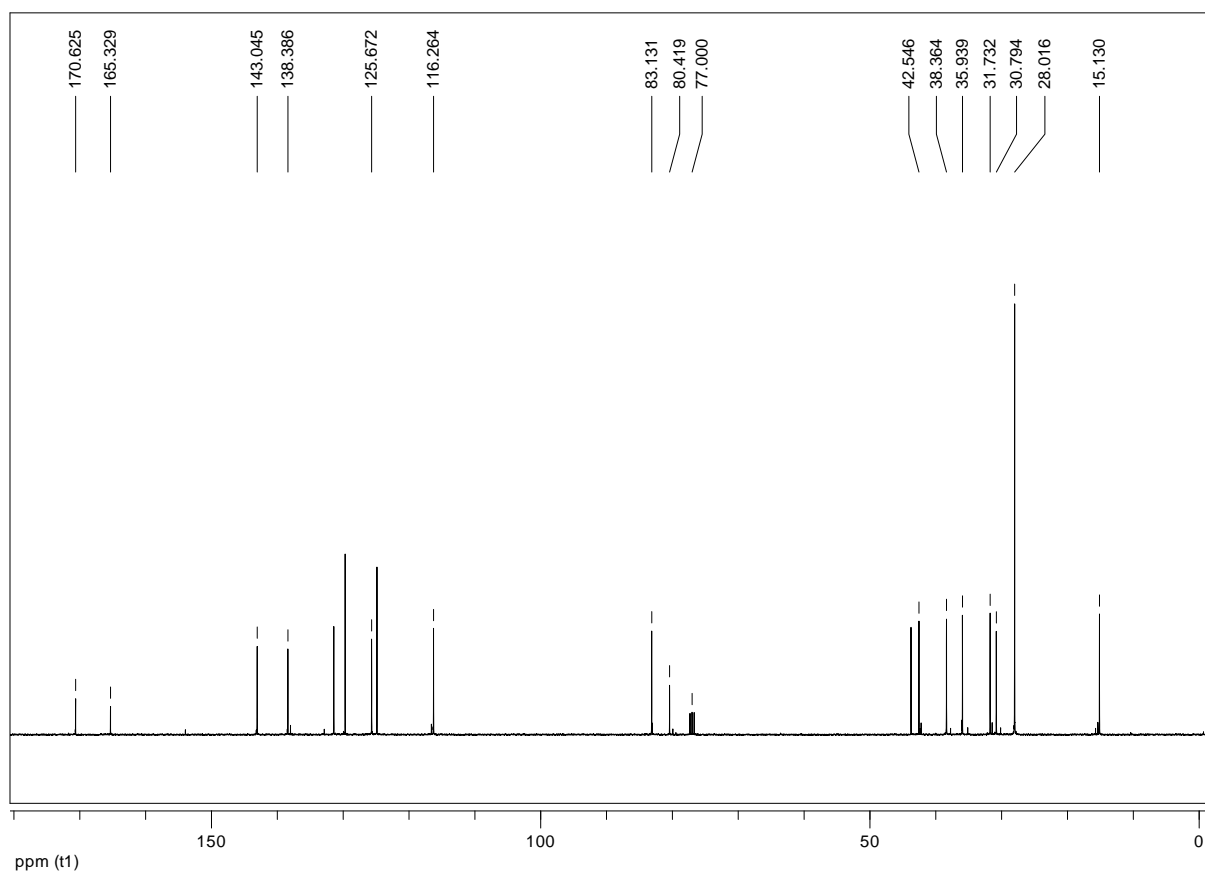



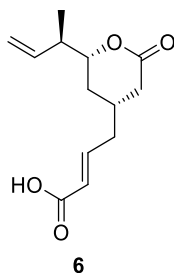

**(E)-4-((2R,4R)-2-((R)-But-3-en-2-yl)-6-oxotetrahydro-2H-pyran-4-yl)but-2-enoic**

**acid (6):** To a solution 5 (284 mg, containing Julia PT sulfone) was added at 0 °C a solution of TFA in CH<sub>2</sub>Cl<sub>2</sub> (1.0 M, 7.7 mL, ca. 14 equiv of TFA). The reaction mixture was stirred at rt for 17 h. Then, the reaction mixture was concentrated under reduced pressure and the crude purified by column chromatography (hexane/EtOAc, 1:1, then EtOAc/MeOH/AcOH, 30:1:0.5) to afford **6** (164 mg, quant.) as a brownish oil.

**R<sub>f</sub>** = 0.54 (chloroform/MeOH/water/AcOH, 90:10:1.0:0.5)

**[α]<sub>D</sub><sup>24</sup>** = +5.5° [*c* = 0.391, CHCl<sub>3</sub>].

**<sup>1</sup>H-NMR** (400.1 MHz, CDCl<sub>3</sub>): δ = 11.0 (br s, 1H), 6.95 (m<sub>c</sub>, 1H), 5.87 (d, *J* = 15.6 Hz, 1H), 5.73 (ddd, *J* = 7.7, 10.4, 17.8 Hz, 1H), 5.16-5.05 (m, 2H), 4.14 (ddd, *J* = 2.9, 6.3, 11.7 Hz, 1H), 2.70 (q, *J* = 10.5 Hz, 1H), 2.44 (m<sub>c</sub>, 1H), 2.34-2.19 (m, 2H), 2.17-2.02 (m, 2H), 1.95 (d, *J* = 13.2 Hz, 1H), 1.29-1.15 (m, 1H), 1.10 (d, *J* = 6.8 Hz, 3H).

**<sup>13</sup>C-NMR** (100.6 MHz, CDCl<sub>3</sub>): δ = 171.0 (2 x C=O), 147.4, 138.3, 123.3, 116.5, 83.3, 42.6, 38.6, 35.9, 31.7, 30.7, 15.2.

**IR** (neat, ν/cm<sup>-1</sup>): 3450br, 3082w, 2924m, 1694s, 1657s, 1420m, 1386m, 1248s, 1204s, 1144m, 1077w, 994m, 921m, 892w, 843w.

**HRMS (ESI):** *m/z* calcd for C<sub>13</sub>H<sub>19</sub>O<sub>4</sub> [M + H]<sup>+</sup>: 239.1278, found: 239.1277.

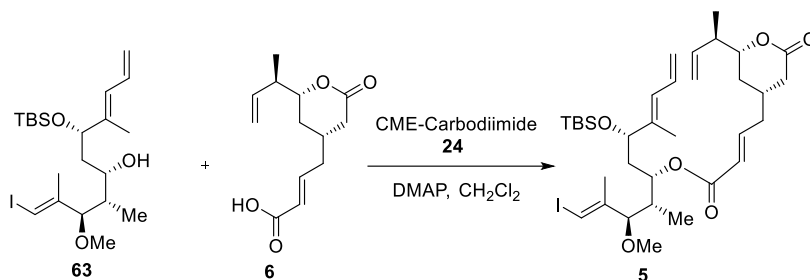

**(1*E*,3*R*,4*S*,5*S*,7*S*,8*E*)-7-(*tert*-butyldimethylsilyloxy)-1-iodo-3-methoxy-2,4,8-trimethylundeca-1,8,10-trien-5-yl (*E*)-4-((2*R*,4*R*)-2-((*R*)-but-3-en-2-yl)-6-oxotetrahydro-2*H*-pyran-4-yl)but-2-enoate (**5**):** To a cooled (0 °C) solution of acid **6** (10.1 mg, 42.4 μmol, 1.00 eq) in CH<sub>2</sub>Cl<sub>2</sub> (0.5 mL) over molecular sieves (10 mg powder, 4 Å) was added CME-carbodiimide (22.3 mg, 52.6 μmol, 1.30 eq). The mixture was aged for 10 min, then a solution of the alcohol **30** (23.9 mg, 48.4 μmol, 1.14 eq) was added. After 20 min the cooling was removed and DMAP (0.5 mg, 10 mol%) was added. TLC after 8 h did not indicate any conversion. Therefore the mixture was stored in the freezer over the weekend. Afterwards it was concentrated under reduced pressure and the residue was purified by column chromatography (Hex:EtOAc 5:1→CHCl<sub>3</sub>:MeOH:H<sub>2</sub>O:CH<sub>3</sub>COOH 90:10:1.0:0.5) to afford the desired **5** (4.1 mg, 14%) as a colourless oil along with the parent alcohol **30** (17.3 mg, 72%). No acid **6** could be recovered.

For analytical data see below.

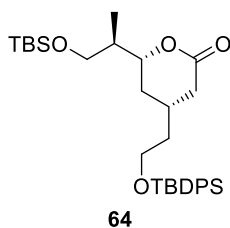

**(4*R*,6*R*)-6-((*R*)-1-(*tert*-butyldimethylsilyloxy)propan-2-yl)-4-(2-((*tert*-butyl-diphenylsilyl)oxy)ethyl)tetrahydro-2*H*-pyran-2-one (64):** A stirred solution of **57** (1.94 g, 6.12 mmol, 1.0 equiv) in dry DMF (5 mL) was treated at rt with imidazole (500 mg, 7.35 mmol, 1.2 equiv) followed by TBDPSCl (1.90 mL, 7.35 mmol, 1.2 equiv). After stirring at rt for 18 h, the reaction mixture was diluted with EtOAc (80 mL). The resulting mixture was washed with brine (3 x 20 mL), dried over MgSO<sub>4</sub> and concentrated *in vacuo*. The residue was purified by column chromatography (hexane/EtOAc, 10:1) to give **64** (3.22 g, 95%) as a colorless oil.

**R<sub>f</sub>** = 0.24 (hexane/EtOAc, 10:1)

**[α]<sub>D</sub><sup>24</sup>** = -10.0° [*c* = 0.366, CHCl<sub>3</sub>]

**<sup>1</sup>H-NMR** (400.1 MHz, CDCl<sub>3</sub>): δ = 7.65 (d, *J* = 6.7 Hz, 4H), 7.48-7.33 (m, 6H), 4.42 (td, *J* = 3.0, 12.0 Hz, 1H), 3.71 (t, *J* = 6.1 Hz, 2H), 3.67-3.59 (m, 1H), 3.59-3.50 (m, 1H), 2.65 (dd, *J* = 5.1, 17.4 Hz, 1H), 2.18 (m<sub>c</sub>, 1H), 2.04 (dd, *J* = 10.7, 17.4 Hz, 1H), 1.86-1.71 (m, 2H), 1.62-1.48 (m, 2H), 1.39-1.20 (m, 1H), 1.05 (s, 9H), 0.92 (d, *J* = 6.9 Hz, 3H), 0.89 (s, 9H), 0.05 (s, 6H).

**<sup>13</sup>C-NMR** (100.6 MHz, CDCl<sub>3</sub>): δ = 171.6, 135.5, 133.6, 129.8, 127.7, 80.2, 64.3, 60.8, 40.3, 38.9, 36.5, 32.6, 28.7, 26.9, 25.9, 19.2, 18.3, 10.7, -5.4.

**IR** (neat, ν/cm<sup>-1</sup>): 3071w, 2954m, 2929m, 2857m, 1738s, 1472m, 1428m, 1389m, 1250m, 1108s, 836s, 778m, 741m, 702s, 613m, 504m.

**HRMS (ESI):** *m/z* calcd for C<sub>32</sub>H<sub>54</sub>NO<sub>4</sub>Si<sub>2</sub> [M + NH<sub>4</sub>]<sup>+</sup>: 572.3586, found: 572.3581.

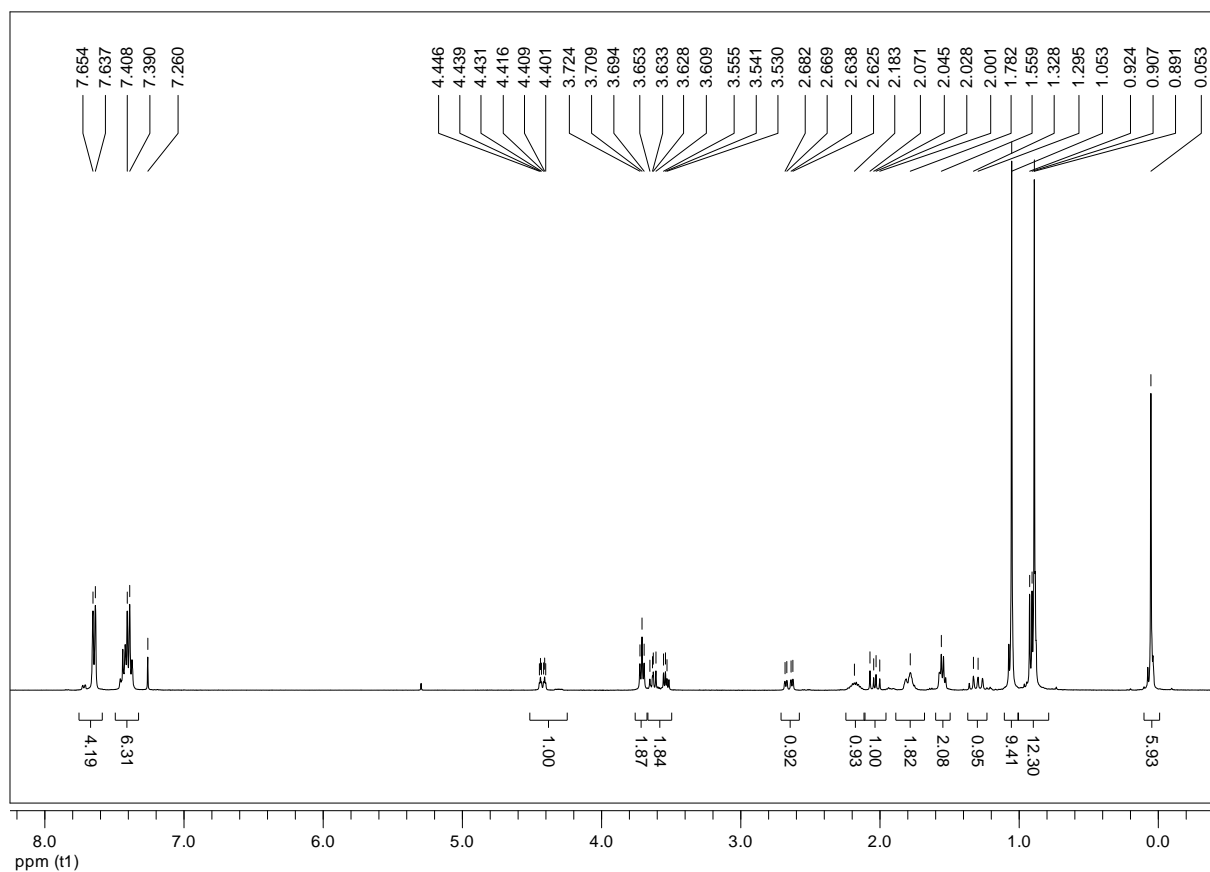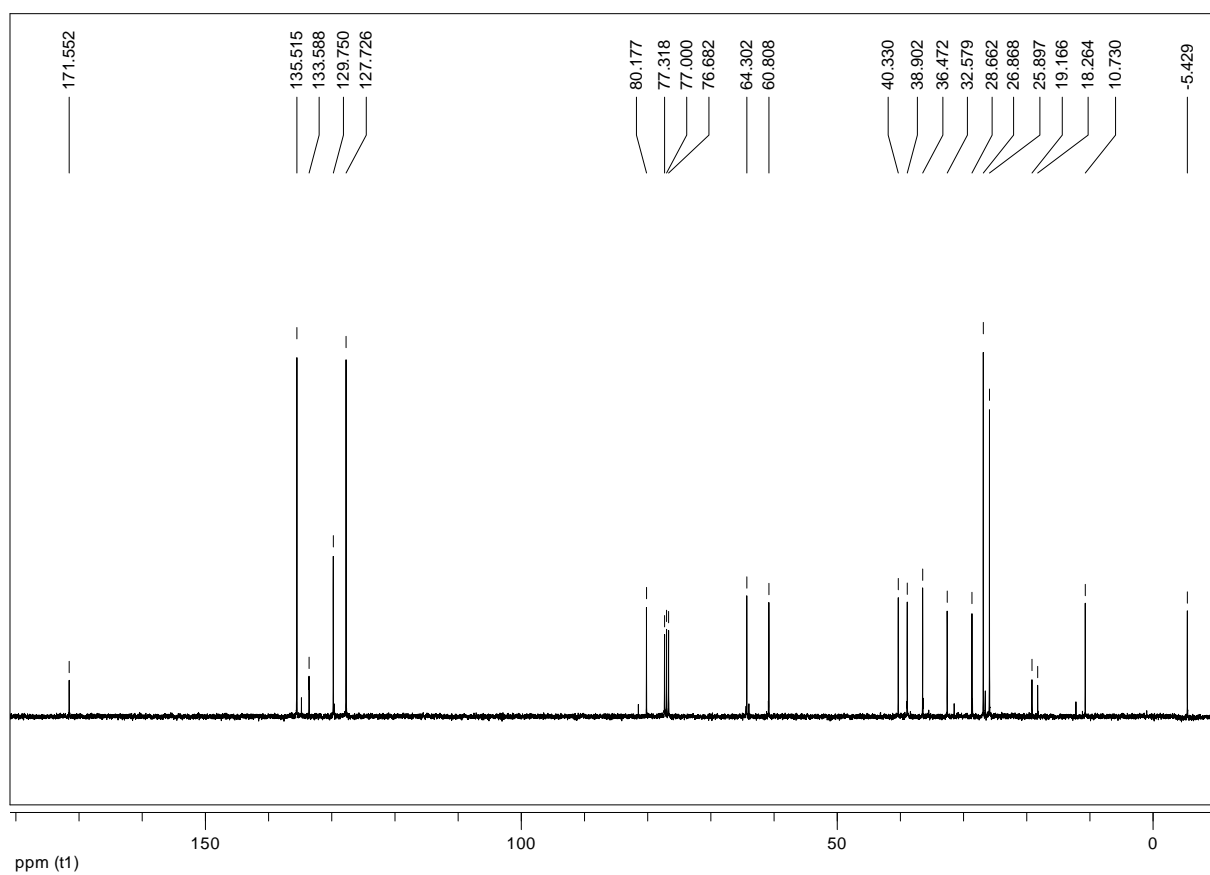

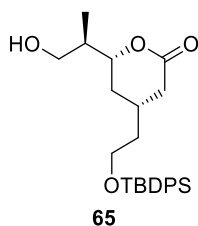

**(4*R*,6*R*)-4-(2-((*tert*-Butyldiphenylsilyl)oxy)ethyl)-6-((*R*)-1-hydroxypropan-2-yl)tetrahydro-2*H*-pyran-2-one (65):** To a solution of **64** (1.52 g, 2.74 mmol, 1.0 equiv) in THF/water (4:1, 28 mL) was added sodium periodate (3.51 g, 16.4 mmol, 6.0 equiv). After stirring at rt for 20 h, the reaction mixture was quenched with water (40 mL) and diluted with EtOAc (40 mL). The layers were separated and the aqueous layer was extracted with EtOAc (2 x 50 mL). The combined organic extracts were washed with brine, dried over MgSO<sub>4</sub> and concentrated under reduced pressure. The residue was purified by column chromatography (hexane/EtOAc, 2:1 → 1:1) to give **65** (995 mg, 82%) as a colorless solid. The analytical data were identical to those reported in literature.<sup>16</sup>

**R<sub>f</sub>** = 0.33 (hexane/EtOAc, 1:1)

**<sup>1</sup>H-NMR** (400.1 MHz, CDCl<sub>3</sub>): δ = 7.68-7.61 (m, 4H), 7.47-7.35 (m, 6H), 4.48 (td, *J* = 3.0, 12.0 Hz, 1H), 3.76-3.67 (m, 1H), 3.71 (t, *J* = 6.1 Hz, 2H), 3.65-3.55 (m, 1H), 2.67 (ddd, *J* = 1.8, 5.8, 17.5 Hz, 1H), 2.18 (mc, 1H), 2.11-1.98 (m, 1H), 1.91-1.73 (m, 2H), 1.71-1.59 (m, 1H), 1.56 (dd, *J* = 6.3, 12.6 Hz, 2H), 1.40-1.23 (m, 1H), 1.05 (s, 9H), 0.94 (d, *J* = 7.0 Hz, 3H).

**<sup>13</sup>C-NMR** (100.6 MHz, CDCl<sub>3</sub>): δ = 171.4, 135.5, 133.5, 129.8, 127.7, 80.5, 64.4, 60.8, 39.8, 38.8, 36.4, 32.3, 28.6, 26.9, 19.2, 10.5.

**HRMS (ESI):** *m/z* calcd for C<sub>26</sub>H<sub>40</sub>NO<sub>4</sub>Si [M + NH<sub>4</sub>]<sup>+</sup>: 458.2721, found: 458.2723.

<sup>16</sup> Mitchell, I. S.; Pattenden, G.; Stonehouse, J. *Org. Biomol. Chem.* **2005**, 3, 4412-4431.

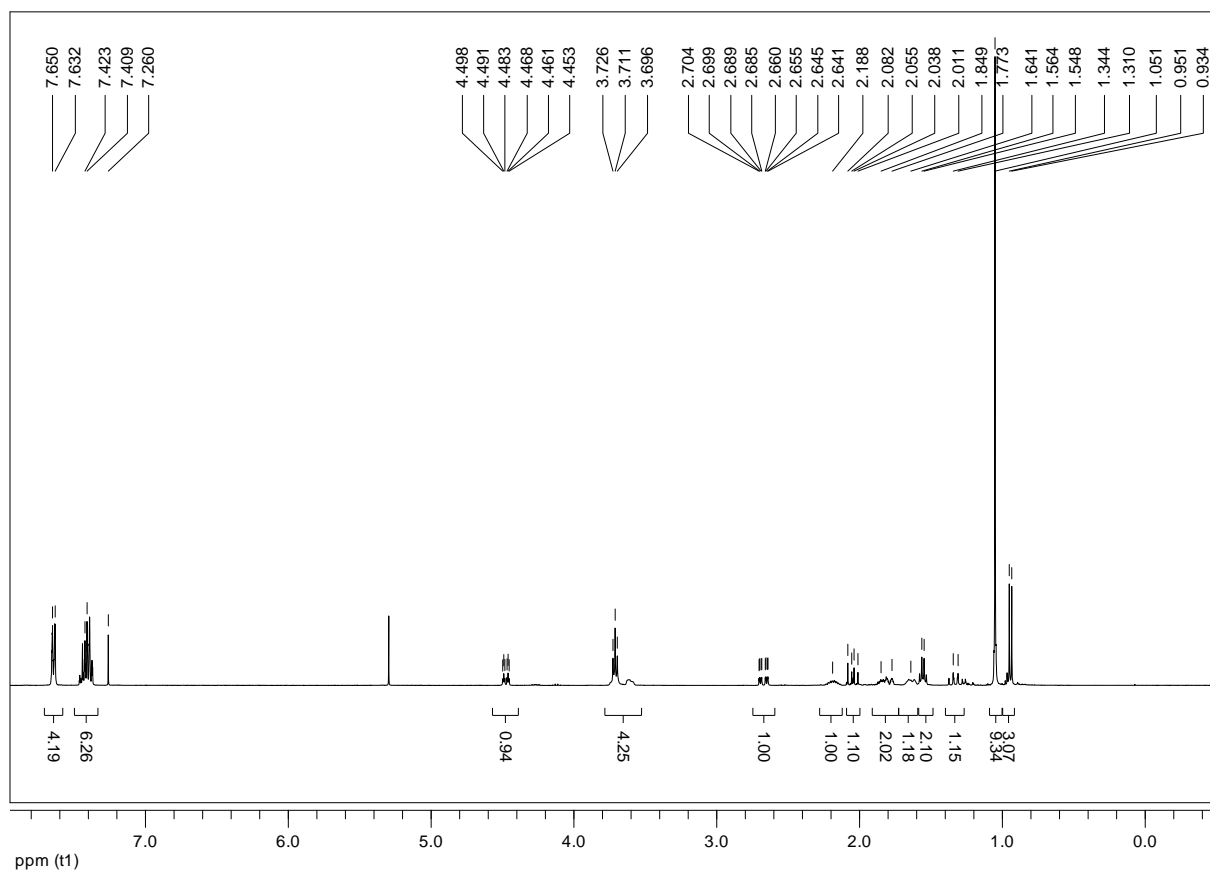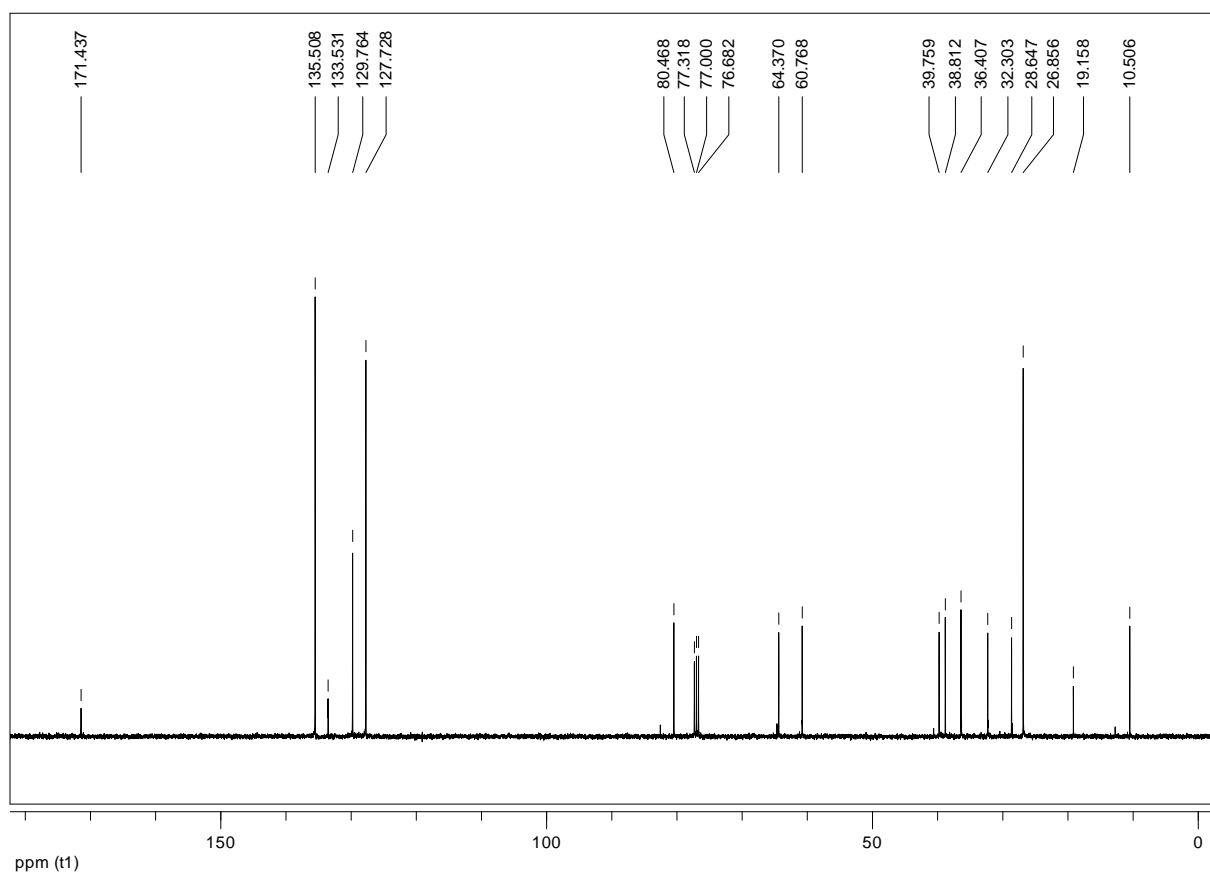

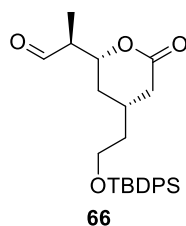

**(S)-2-((2R,4R)-4-(2-((*tert*-Butyldiphenylsilyl)oxy)ethyl)-6-oxotetrahydro-2H-pyran-2-yl)propanal (**66**):** To a solution of **65** (333 mg, 0.76 mmol, 1.0 equiv) in CH<sub>2</sub>Cl<sub>2</sub> (15.1 mL) cooled at 0 °C was added *Dess-Martin* periodinane (385 mg, 0.91 mmol, 1.2 equiv) in one portion. After stirring for 2 h at rt, sat. Na<sub>2</sub>S<sub>2</sub>O<sub>3</sub> (20 mL), sat. NaHCO<sub>3</sub> (20 mL) and Et<sub>2</sub>O (50 mL) were added at rt to the reaction mixture. The layers were separated and the aqueous layer was extracted with Et<sub>2</sub>O (2 x 25 mL). The combined organic extracts were washed with sat. NaHCO<sub>3</sub> (20 mL) and brine, dried over MgSO<sub>4</sub>, filtered and concentrated under reduced pressure. The crude product **66** (388 mg) was used for the step without further purification, due to decomposition on silica gel. The analytical data were in agreement with those reported in the literature.<sup>17</sup>

**R<sub>f</sub>** = 0.78 (hexane/EtOAc, 1:1)

**<sup>1</sup>H-NMR** (400.1 MHz, CDCl<sub>3</sub>): δ = 9.73 (d, *J* = 0.8 Hz, 1H), 7.67-7.60 (m, 4H), 7.48-7.35 (m, 6H), 4.65 (dd, *J* = 2.9, 4.4, 12.0 Hz, 1H), 3.71 (t, *J* = 5.9 Hz, 2H), 2.69 (ddd, *J* = 1.8, 5.7, 17.5 Hz, 1H), 2.56 (m<sub>c</sub>, 1H), 2.22 (m<sub>c</sub>, 1H), 2.07 (dd, *J* = 10.9, 17.6 Hz, 1H), 1.88 (m<sub>c</sub>, 1H), 1.55 (dd, *J* = 6.3, 12.4 Hz, 2H), 1.27 (m<sub>c</sub>, 1H), 1.20 (d, *J* = 7.2 Hz, 3H), 1.05 (s, 9H).

**<sup>13</sup>C-NMR** (100.6 MHz, CDCl<sub>3</sub>): δ = 202.0, 170.4, 135.5, 133.5, 133.4, 129.8, 127.8, 79.1, 60.6, 50.2, 38.6, 36.2, 32.2, 28.5, 26.9, 19.2, 8.5.

**HRMS (ESI):** *m/z* calcd for C<sub>26</sub>H<sub>34</sub>NaO<sub>4</sub>Si [M + Na]<sup>+</sup>: 461.2119, found: 461.2118.

<sup>17</sup> Mitchell, I. S.; Pattenden, G.; Stonehouse, J. *Org. Biomol. Chem.* **2005**, 3, 4412-4431.

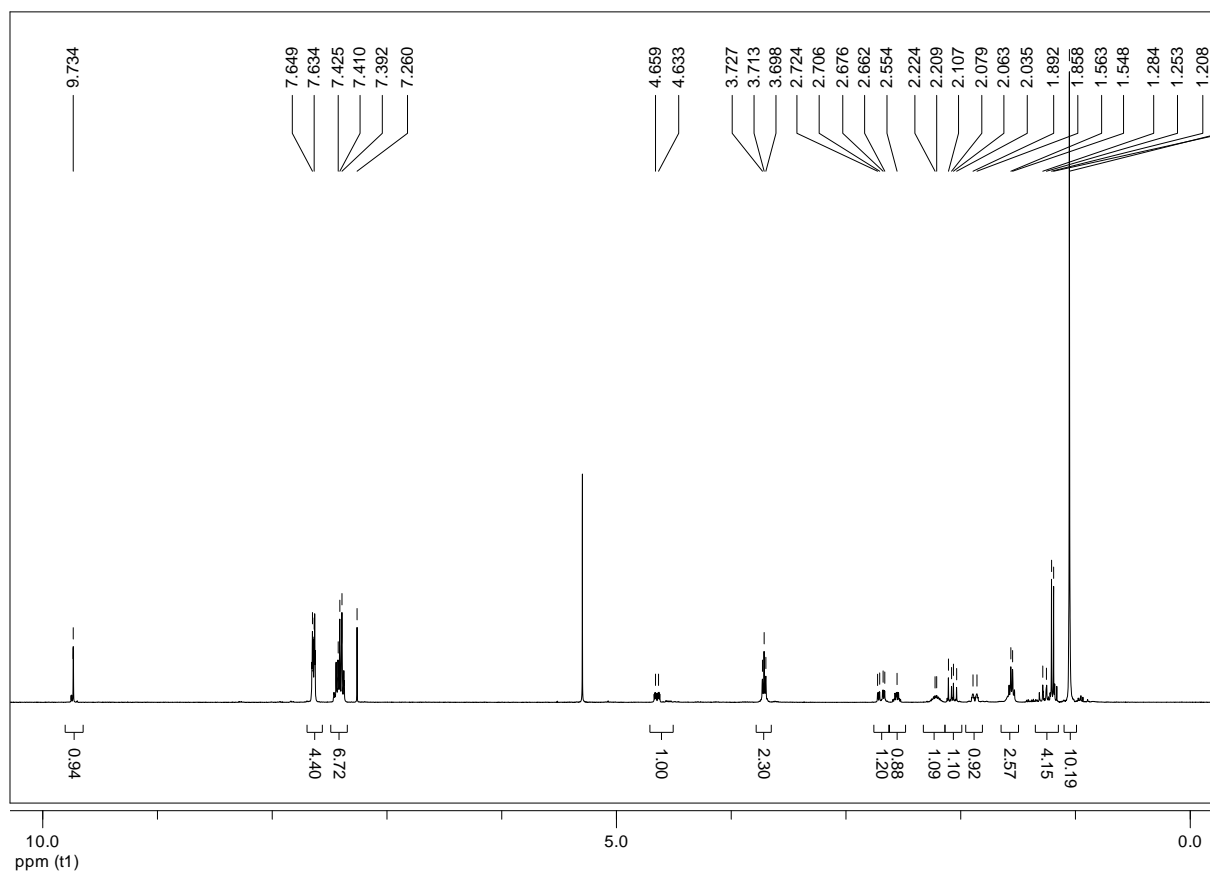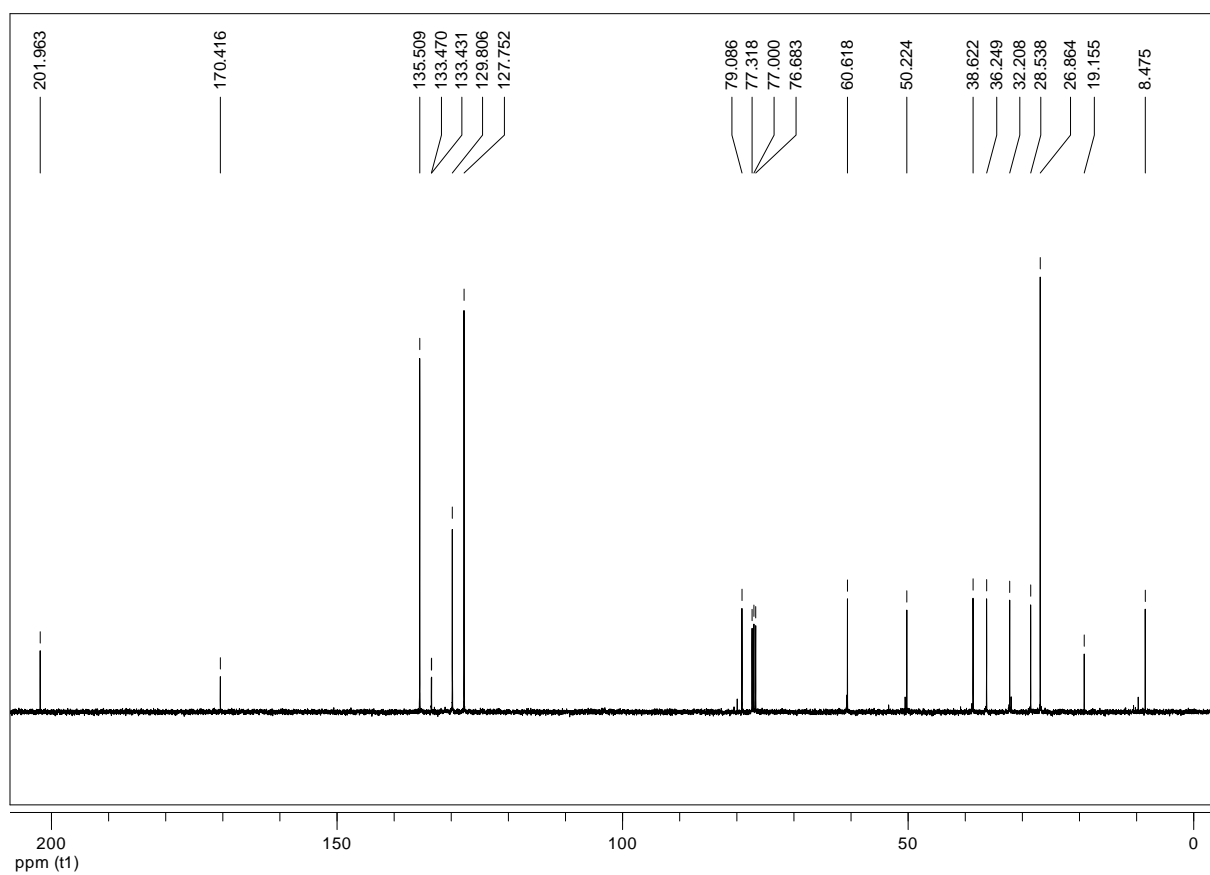



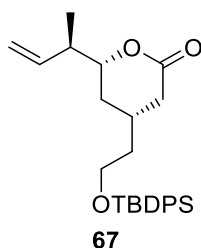

**(4*R*,6*R*)-6-((*R*)-but-3-en-2-yl)-4-(2-((*tert*-butyldiphenylsilyl)oxy)ethyl)tetrahydro-2H-pyran-2-one (67):** To a solution of **66** (388 mg, crude) and the Julia PT sulfone **62**<sup>18</sup> (220 mg, 0.98 mmol, 1.3 equiv) in THF (7.7 mL) was added at  $-78\text{ }^{\circ}\text{C}$  solid NaHMDS (180 mg, 0.98 mmol, 1.3 equiv). After stirring the yellowish solution at  $-78\text{ }^{\circ}\text{C}$  for 2 h, the reaction mixture was allowed to warm to rt over 2.25 h. pH7 buffer solution (20 mL) was added and the mixture was diluted with Et<sub>2</sub>O (30 mL). The layers were separated and the aqueous layer was extracted with Et<sub>2</sub>O (2 x 30 mL). The combined organic extracts were washed with brine, dried over MgSO<sub>4</sub>, filtered and concentrated under reduced pressure. The crude product was purified by column chromatography (hexane/EtOAc, 10:1  $\rightarrow$  7:1) to afford **67** (216 mg, 65% over 2 steps) as a colorless oil.

**R<sub>f</sub>** = 0.43 (hexane/EtOAc, 5:1)

**[ $\alpha$ ]<sub>D</sub><sup>24</sup>** =  $+5.2^{\circ}$  [ $c$  = 0.360, CHCl<sub>3</sub>]

**<sup>1</sup>H-NMR** (400.1 MHz, CDCl<sub>3</sub>):  $\delta$  = 7.67-7.60 (m, 4H), 7.47-7.35 (m, 6H), 5.74 (ddd,  $J$  = 7.7, 10.4, 17.3 Hz, 1H), 5.14-5.04 (m, 2H), 4.10 (ddd,  $J$  = 2.9, 6.2, 11.8 Hz, 1H), 3.70 (t,  $J$  = 6.0 Hz, 2H), 2.65 (ddd,  $J$  = 1.8, 5.4, 17.1 Hz, 1H), 2.42 (m<sub>c</sub>, 1H), 2.13 (m<sub>c</sub>, 1H), 2.03 (dd,  $J$  = 10.9, 17.1 Hz, 1H), 1.91 (m<sub>c</sub>, 1H), 1.59-1.50 (m, 2H), 1.21-1.07 (m, 1H), 1.10 (d,  $J$  = 6.8 Hz, 3H), 1.05 (s, 9H).

**<sup>13</sup>C-NMR** (100.6 MHz, CDCl<sub>3</sub>):  $\delta$  = 171.3, 138.7, 135.5, 133.5, 129.8, 127.7, 116.1, 83.5, 60.8, 42.7, 38.7, 36.4, 32.2, 28.5, 26.9, 19.2, 15.3.

**IR** (neat,  $\nu/\text{cm}^{-1}$ ): 3072w, 2958m, 2929m, 2857m, 1738s, 1472w, 1428m, 1388w, 1234m, 1110s, 1008w, 822m, 745m, 703s, 613w.

**HRMS (ESI):**  $m/z$  calcd for C<sub>27</sub>H<sub>40</sub>NO<sub>3</sub>Si [ $M + \text{NH}_4$ ]<sup>+</sup>: 454.2772, found: 454.2761.

<sup>18</sup> Julia PT sulfone **62** was prepared according to: Lebrun, M.-E.; Le Marquand, P.; Berthelette, C. *J. Org. Chem.* **2006**, *71*, 2009-2013. See below for the experimental procedure.

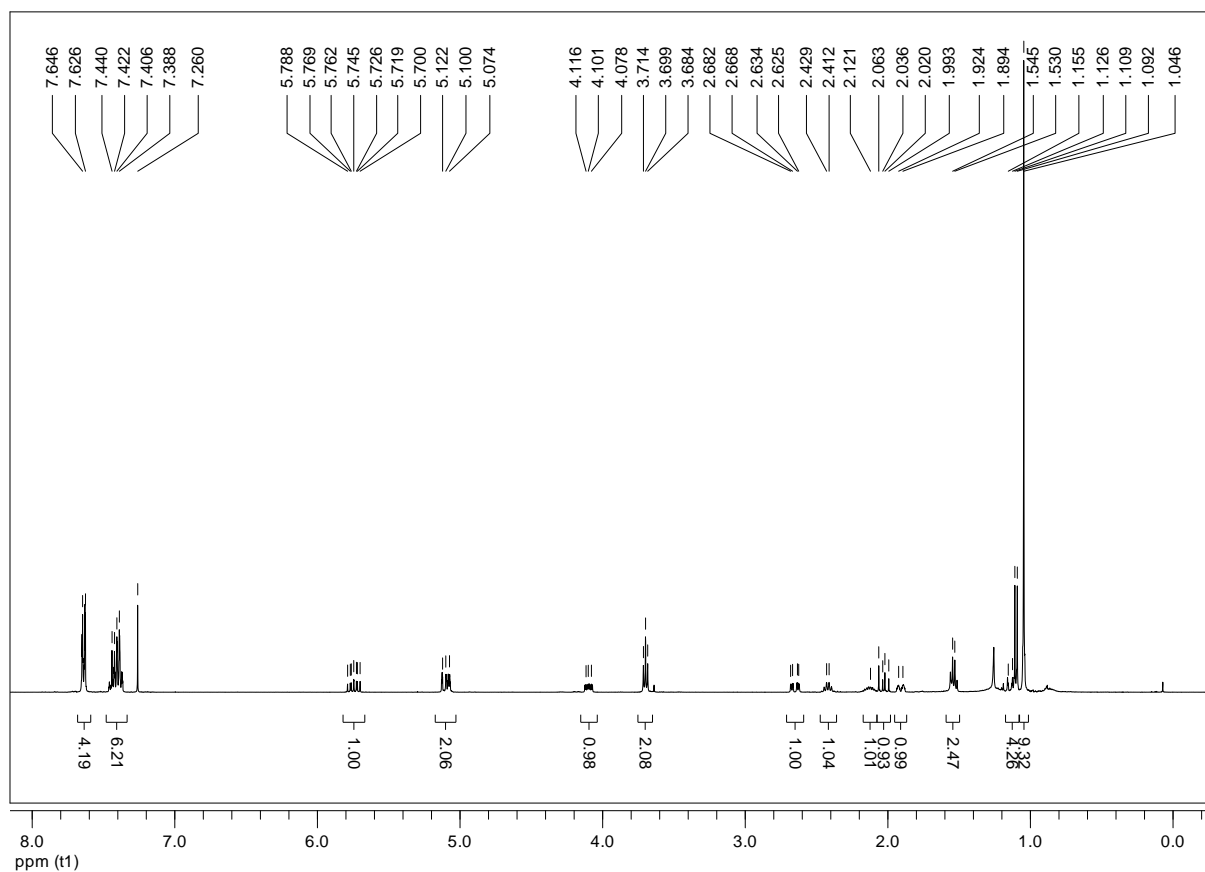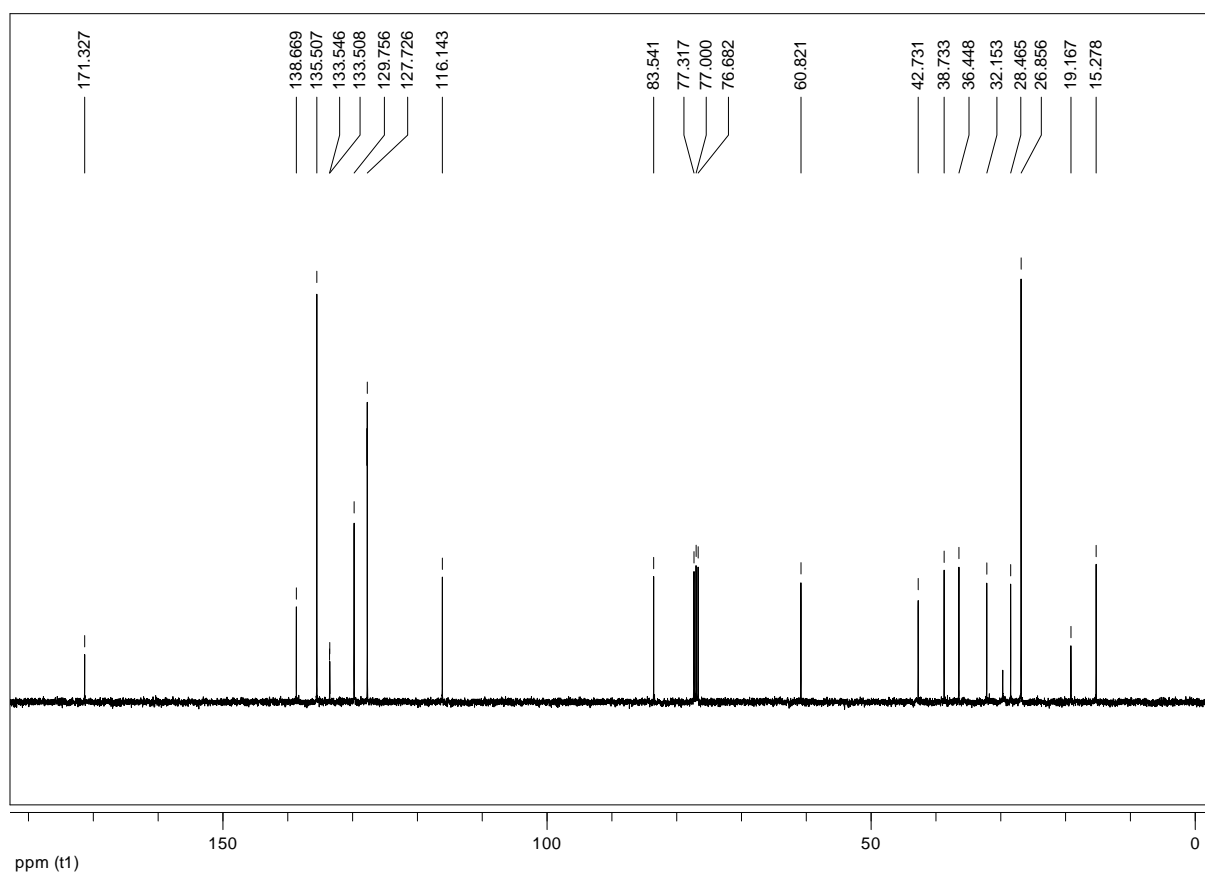

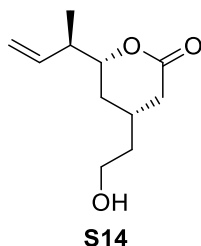

**(4*R*,6*R*)-6-((*R*)-But-3-en-2-yl)-4-(2-hydroxyethyl)tetrahydro-2H-pyran-2-one**

**(S14):** To a solution of **67** (34.4 mg, 0.08 mmol, 1.0 equiv) in THF (0.8 mL) was added at 0 °C TBAF (0.32 mL, 0.32 mmol, 4.0 equiv, 1.0 M in THF) and AcOH (18.1  $\mu$ L, 0.32 mmol, 4.0 equiv). After stirring for 20 h at rt, the reaction mixture was quenched with sat.  $\text{NH}_4\text{Cl}$  (10 mL) and diluted with EtOAc (15 mL). The layers were separated and the aqueous layer was extracted with EtOAc (2 x 15 mL). The combined organic extracts were washed with brine, dried over  $\text{MgSO}_4$  and the solvent was removed under reduced pressure. The residue was purified by column chromatography (hexane/EtOAc, 1:2  $\rightarrow$  0:1) to give **S14** as a colorless oil (13.6 mg, 87%).

$R_f$  = 0.38 (EtOAc)

$[\alpha]_D^{24} = +14.0^\circ$  [ $c$  = 0.595,  $\text{CHCl}_3$ ]

**$^1\text{H-NMR}$**  (400.1 MHz,  $\text{CDCl}_3$ ):  $\delta$  = 5.69 (mc, 1H), 5.10-4.99 (m, 2H), 4.09 (ddd,  $J$  = 2.9, 6.3, 11.8 Hz, 1H), 3.65 (t,  $J$  = 6.3 Hz, 2H), 2.67 (mc, 1H), 2.39 (mc, 1H), 2.16-1.97 (m, 2H), 1.96-1.87 (m, 1H), 1.67 (br s, 1H), 1.51 (mc, 2H), 1.26-1.07 (m, 1H), 1.05 (d,  $J$  = 6.8 Hz, 3H).

**$^{13}\text{C-NMR}$**  (100.6 MHz,  $\text{CDCl}_3$ ):  $\delta$  = 171.4, 138.6, 116.2, 83.5, 59.6, 42.7, 38.8, 36.3, 32.1, 28.2, 15.3.

**IR** (neat,  $\nu/\text{cm}^{-1}$ ): 3420br, 2966m, 2923m, 1714s, 1383m, 1245s, 1175w, 1089m, 1053s, 1011m, 921m, 699w.

**HRMS (ESI):**  $m/z$  calcd for  $\text{C}_{11}\text{H}_{19}\text{O}_3$   $[\text{M} + \text{H}]^+$ : 199.1329, found: 199.1326.

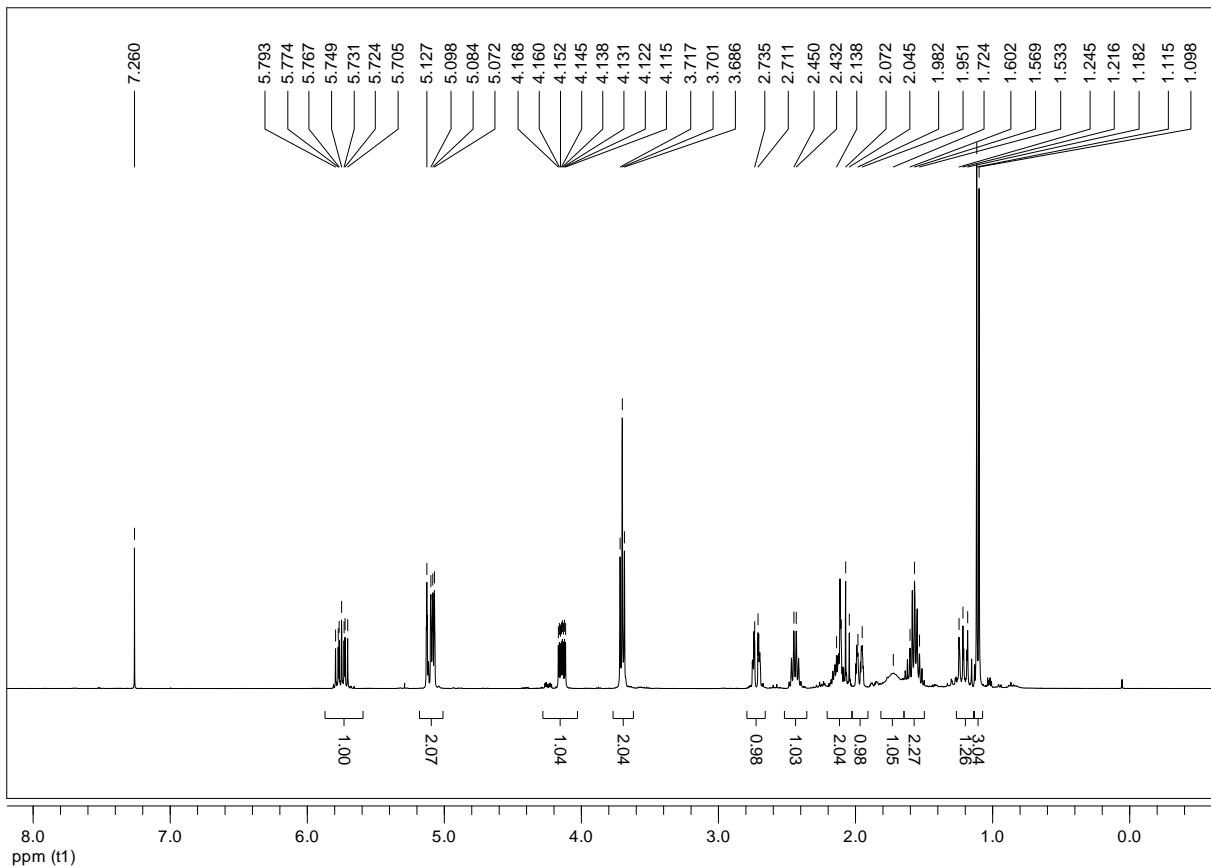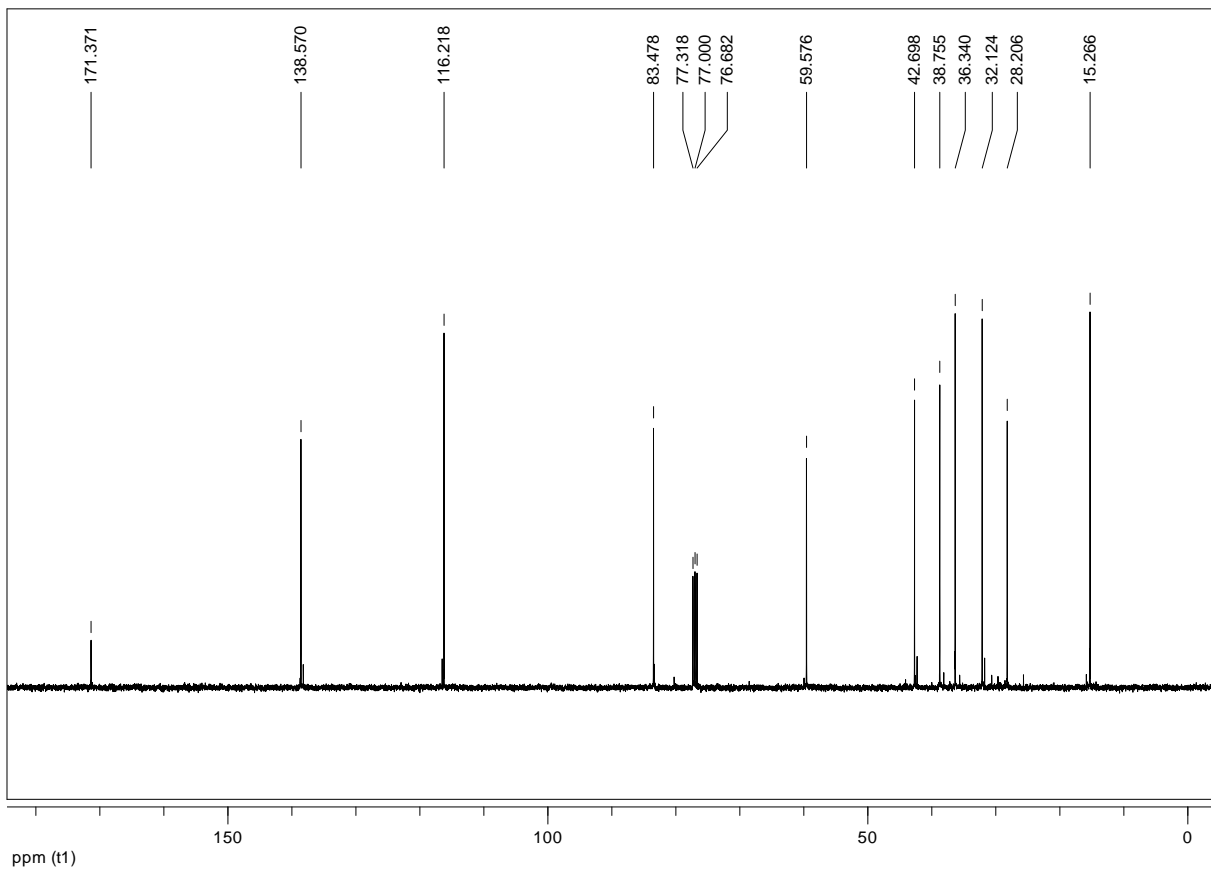

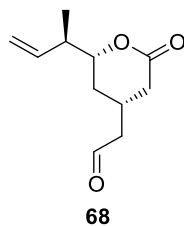

**2-((2R,4S)-2-((R)-But-3-en-2-yl)-6-oxotetrahydro-2H-pyran-4-yl)acetaldehyde**

**(68):** To a solution of oxalyl chloride (0.05 mL, 0.61 mmol, 1.5 equiv) in CH<sub>2</sub>Cl<sub>2</sub> (5.0 mL) at –78 °C was added dropwise DMSO (0.09 mL, 1.22 mmol, 3.0 equiv). After stirring at –78 °C for 10 min, a solution of **S14** (80.6 mg, 0.41 mmol, 1.0 equiv) in CH<sub>2</sub>Cl<sub>2</sub> (2.1 mL) was added dropwise. The resultant cloudy mixture was stirred at –78 °C for 1.5 h, and then TEA (0.23 mL, 1.63 mmol, 4.0 equiv) was added slowly and the reaction mixture was allowed to warm to room temperature (1 h). The reaction was quenched with water (10 mL), and the layers were separated. The aqueous phase was extracted with CH<sub>2</sub>Cl<sub>2</sub> (3 x 20 mL) and the combined organic phases were washed with brine, dried over MgSO<sub>4</sub>, filtered and concentrated *in vacuo*. The crude product was purified by column chromatography (hexane/EtOAc, 2:1 → 1:1 → 1:2) to afford **68** (76.0 mg, 95%) as a colorless oil.

**R<sub>f</sub>** = 0.59 (EtOAc)

**[α]<sub>D</sub><sup>24</sup>** = +4.8° [*c* = 0.535, CHCl<sub>3</sub>]

**<sup>1</sup>H-NMR** (400.1 MHz, CDCl<sub>3</sub>): δ = 9.76 (s, 1H), 5.73 (ddd, *J* = 7.7, 10.4, 17.3 Hz, 1H), 5.14-5.05 (m, 2H), 4.17 (ddd, *J* = 2.9, 6.3, 11.8 Hz, 1H), 2.81-2.70 (m, 1H), 2.60-2.48 (m, 3H), 2.44 (m<sub>c</sub>, 1H), 2.15-2.04 (m, 1H), 2.00 (m<sub>c</sub>, 1H), 1.30-1.14 (m, 1H), 1.11 (d, *J* = 6.8 Hz, 3H).

**<sup>13</sup>C-NMR** (100.6 MHz, CDCl<sub>3</sub>): δ = 199.6, 170.3, 138.3, 116.4, 83.1, 49.8, 42.6, 35.8, 31.8, 25.9, 15.2.

**IR** (neat, ν/cm<sup>-1</sup>): 2974m, 2922m, 1723s, 1385m, 1238s, 1174w, 1080m, 1053m, 1006m, 923m.

**HRMS (ESI):** *m/z* calcd for C<sub>11</sub>H<sub>17</sub>O<sub>3</sub> [*M* + *H*]<sup>+</sup>: 197.1172, found: 197.1173.

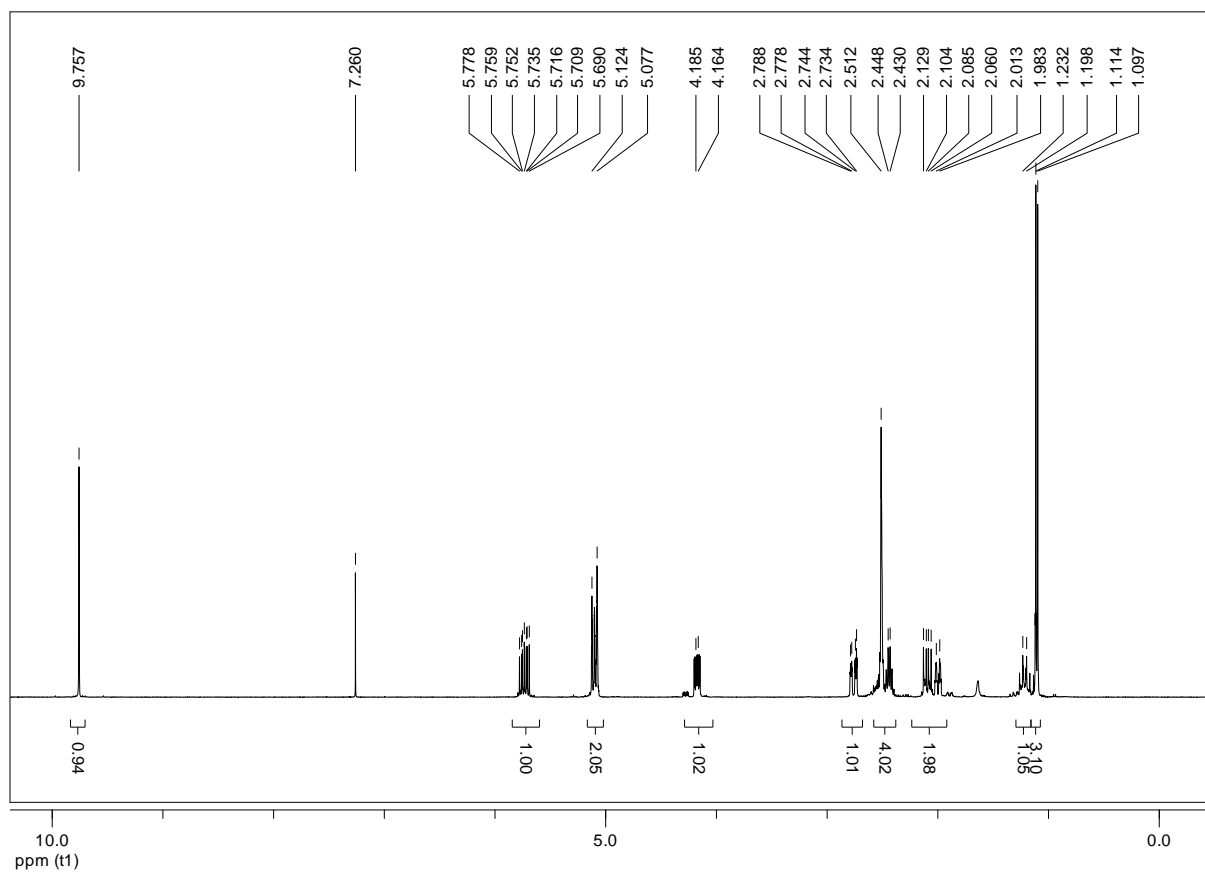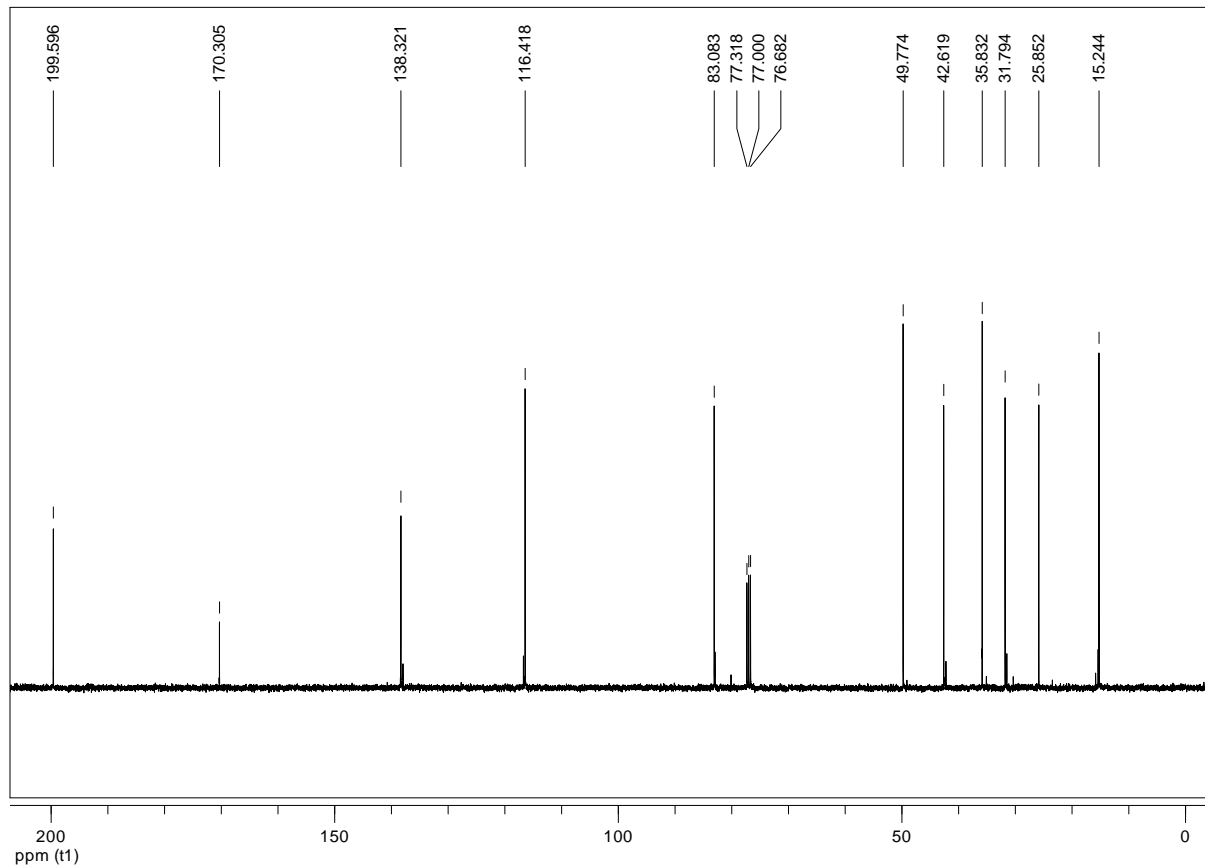

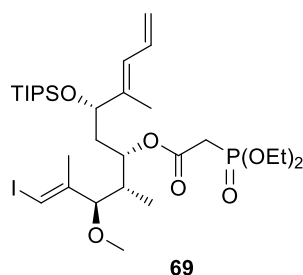

**(1E,3R,4S,5S,7S,8E)-1-iodo-3-methoxy-2,4,8-trimethyl-7-((triisopropylsilyl)oxy)-undeca-1,8,10-trien-5-yl 2-(diethoxyphosphoryl)acetate (69):** To a cooled (0 °C) solution of diethylphosphonoacetic acid (**55**) (0.178 mL, 1.11 mmol, 1.50 eq) in CH<sub>2</sub>Cl<sub>2</sub> (10 mL) over molecular sieves (beads, 3 Å) was added CME-carbodiimide (563 mg, 1.33 mmol, 1.80 eq). The mixture was stirred at 0 °C for 10-15 min, then a solution of the alcohol **30** (396 mg, 0.738 mmol, 1.00 eq) in CH<sub>2</sub>Cl<sub>2</sub> (4 mL, rinsed with 2×3 mL) was added. The cooling was removed and DMAP (9 mg, 10 mol%) was added a few minutes later. A precipitate had formed already by the time of the DMAP addition. TLC reaction control after 45 min showed full conversion. After 1 h, the mixture was transferred into a flask and concentrated under reduced pressure. The crude was purified by column chromatography (hex:EtOAc 2:1→1:1) to afford the desired ester **69** (458 mg, 87%) as a colourless oil, which crystallized upon storage in a freezer.

**TLC** (Hex:EtOAc 1:1):  $R_f$  = 0.48

**[ $\alpha$ ]<sub>D</sub><sup>24</sup>** = +29.1 ( $c$  = 1.26, CHCl<sub>3</sub>)

**<sup>1</sup>H-NMR** (CDCl<sub>3</sub>, 400.1 MHz):  $\delta$  = 6.50 (m<sub>c</sub>, 1H), 6.17 (m<sub>c</sub>, 1H), 5.87 (dd,  $J$  = 10.9 Hz,  $J$  = 0.5 Hz, 1H), 5.18 (dd,  $J$  = 1.8 Hz,  $J$  = 16.9 Hz, 1H), 5.08 (dd,  $J$  = 1.8 Hz,  $J$  = 10.2 Hz, 1H), 4.77 (ddd,  $J$  = 1.5 Hz,  $J$  = 4.5 Hz,  $J$  = 10.3 Hz, 1H), 4.18-4.07 (m, 5H), 3.43 (d,  $J$  = 6.7 Hz, 1H), 3.17 (s, 3H), 2.81 (dd,  $J$  = 14.3 Hz,  $J$  = 28.7 Hz, 1H), 2.76 (dd,  $J$  = 14.3 Hz,  $J$  = 28.8 Hz, 1H), 2.00 (ddd,  $J$  = 4.6 Hz,  $J$  = 6.9 Hz,  $J$  = 6.9 Hz, 1H), 1.90-1.84 (m, 1H), 1.81 (d,  $J$  = 1.1 Hz, 3H), 1.73 (d,  $J$  = 1.1 Hz, 3H), 1.69 (ddd,  $J$  = 1.5 Hz,  $J$  = 5.9 Hz,  $J$  = 14.6 Hz, 1H), 1.33 (2×t,  $J$  = 7.1 Hz, 6H), 1.06-0.98 (m, 21H), 0.93 (d,  $J$  = 6.9 Hz, 3H)/

**<sup>13</sup>C-NMR** (CDCl<sub>3</sub>, 100.6 MHz):  $\delta$  = 164.9 (d,  $J$  = 6.4 Hz), 146.4, 140.4, 132.4, 126.3, 117.4, 87.0, 79.0, 77.0, 73.8, 62.52 (d,  $J$  = 6.2 Hz), 62.48 (d,  $J$  = 6.3 Hz), 56.7, 39.1, 35.7, 34.5 (d,  $J$  = 134 Hz), 19.8, 18.1, 18.0, 16.34 (d,  $J$  = 6.1 Hz), 16.30 (d,  $J$  = 6.1 Hz), 12.4, 11.4, 9.7.

**IR** ( $\nu$ /[ $\text{cm}^{-1}$ ]) 2964, 2942, 2893, 2866, 1734, 1463, 1382, 1261 (s), 1089, 1050 (s), 1025 (s), 988, 967, 905, 882, 810, 785, 736, 681, 653, 621, 572, 506, 459, 446, 424; **HRMS** Calcd. for  $\text{C}_{30}\text{H}_{60}\text{INO}_7\text{PSi}$   $[\text{M}+\text{NH}_4]^+$   $m/z$  732.2916. Found: 732.2921.



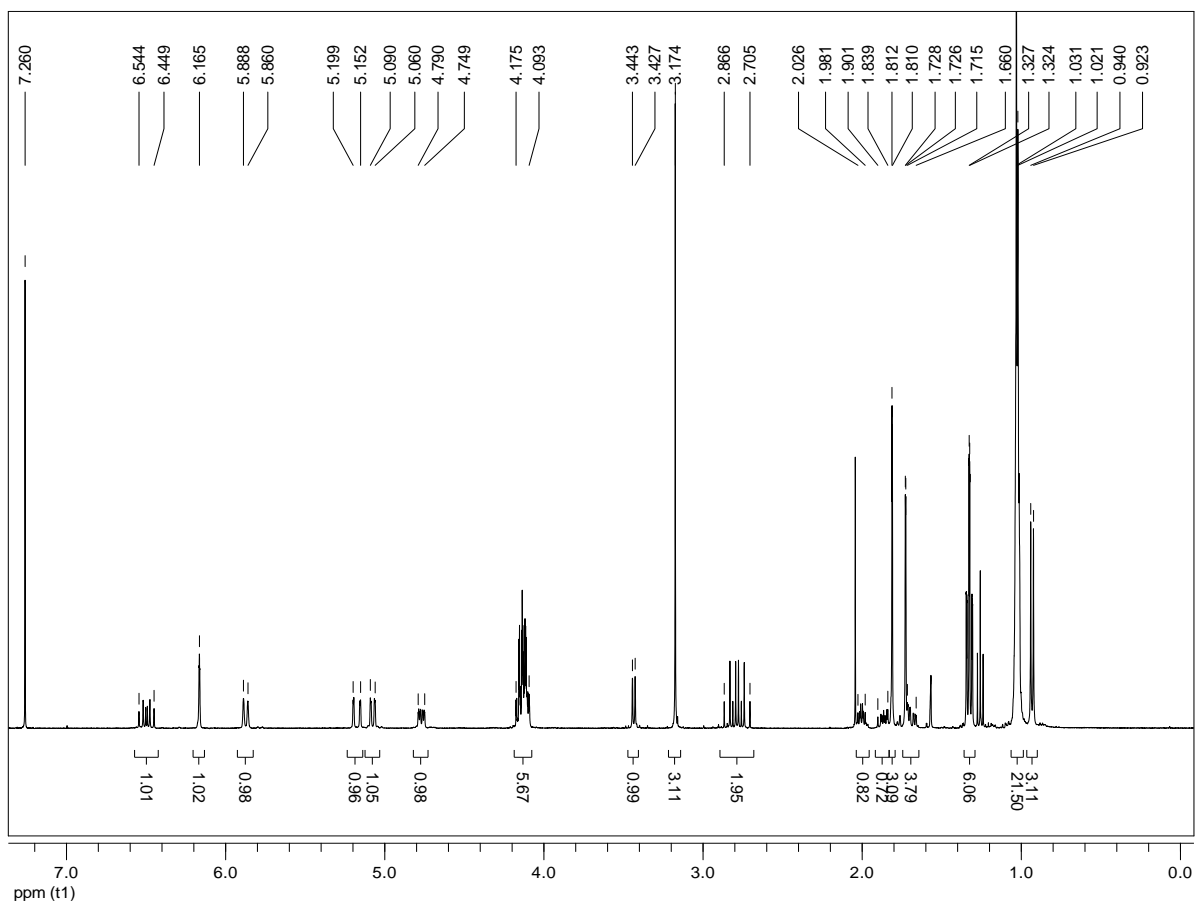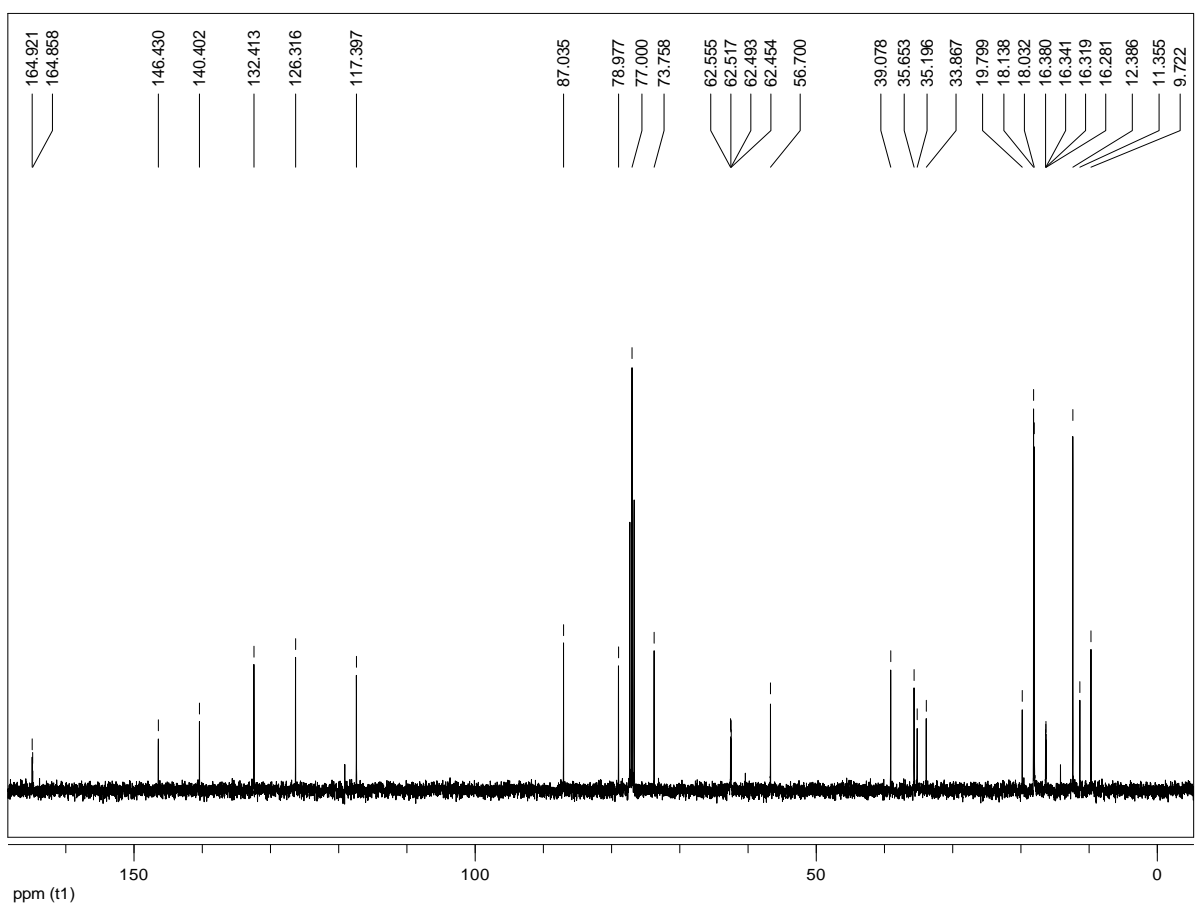

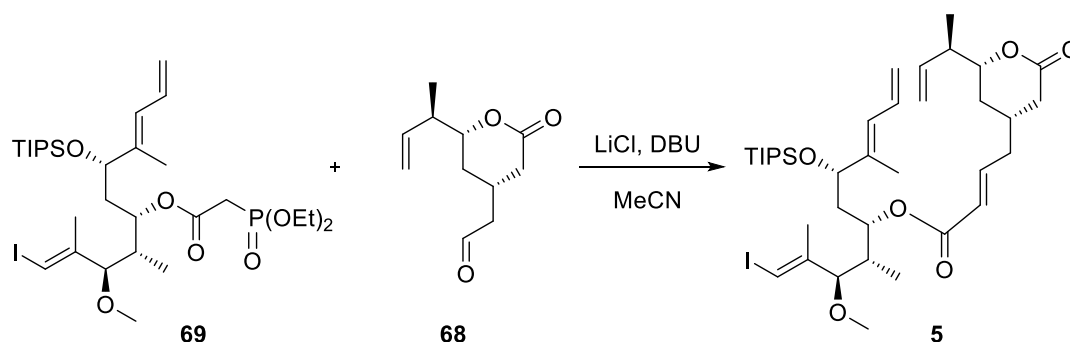

**(1*E*,3*R*,4*S*,5*S*,7*S*,8*E*)-1-iodo-3-methoxy-2,4,8-trimethyl-7-((triisopropylsilyl)oxy)-undeca-1,8,10-trien-5-yl (*E*)-4-((2*R*,4*R*)-2-((*R*)-but-3-en-2-yl)-6-oxotetrahydro-2*H*-pyran-4-yl)but-2-enoate (**5**):** To LiCl (9.19 mg, 217  $\mu\text{mol}$ , 1.20 eq) was added a solution of the phosphonate **69** (155 mg, 217  $\mu\text{mol}$ , 1.20 eq) in MeCN (1.1 mL), followed by DBU (30.0  $\mu\text{L}$ , 199  $\mu\text{mol}$ , 1.10 eq). After 20 min stirring at rt, the mixture was cooled to 0 °C, whereupon the solution turned turbid. Then a solution of the aldehyde **68** (35.5 mg, 181  $\mu\text{mol}$ , 1.00 eq) in MeCN (1.7 mL) was added dropwise. TLC and ESI/MS-control after 45 min indicated, that no aldehyde was left. After 1 h the mixture was concentrated at the rotavap and the residue was purified by flash chromatography (hex:EtOAc 5:1→2:1) to afford the desired  $\alpha,\beta$ -unsaturated ester **5** (127.5 mg, 92% wt/wt along with EtOAc, 117 mg, 85%) as a colourless oil.

**TLC** (hex:EtOAc 1:1):  $R_f$  = 0.79

**$[\alpha]_D^{24}$**  = +22.5 ( $c$  = 0.96,  $\text{CHCl}_3$ )

**$^1\text{H-NMR}$**  ( $\text{CDCl}_3$ , 400.1 MHz):  $\delta$  = 6.75 ( $m_c$ , 1H), 6.43 ( $m_c$ , 1H), 6.16 ( $m_c$ , 1H), 5.88 (pseudo d,  $J$  = 10.8 Hz, 1H), 5.80-5.69 ( $m$ , 2H), 5.17-5.06 ( $m$ , 3H), 5.02 (dd,  $J$  = 1.8 Hz,  $J$  = 10.2 Hz, 1H), 4.78 (ddd,  $J$  = 1.6 Hz,  $J$  = 4.1 Hz,  $J$  = 10.2 Hz, 1H), 4.17-4.10 ( $m$ , 2H), 3.38 (d,  $J$  = 7.1 Hz, 1H), 3.16 (s, 3H), 2.69 ( $m_c$ , 1H), 2.45 ( $m_c$ , 1H), 2.26-2.14 ( $m$ , 2H), 2.14-2.01 ( $m$ , 3H), 2.00-1.91 ( $m$ , 1H), 1.90-1.78 ( $m$ , 1H), 1.83 (d,  $J$  = 1.0 Hz, 3H), 1.76-1.65 ( $m$ , 1H), 1.71 (d,  $J$  = 1.1 Hz, 3H), 1.27-1.14 ( $m$ , 1H), 1.12 (d,  $J$  = 6.8 Hz, 3H), 1.06-0.97 ( $m$ , 21H), 0.91 (d,  $J$  = 6.9 Hz, 3H)

**$^{13}\text{C-NMR}$**  ( $\text{CDCl}_3$ , 100.6 MHz):  $\delta$  = 170.6, 165.2, 146.5, 144.3, 140.3, 138.4, 132.6, 126.4, 124.2, 116.9, 116.5, 87.6, 83.2, 79.0, 76.6, 72.5, 56.7, 42.7, 39.0, 38.6, 36.0, 35.7, 31.8, 31.0, 19.7, 18.2, 18.1, 15.3, 12.4, 11.6, 9.8.

**IR** ( $\nu$ /[cm<sup>-1</sup>]) 3016, 2963, 2941, 2892, 2866, 1718, 1656, 1462, 1420, 1381, 1329, 1311, 1247, 1217, 1203, 1157, 1082, 1054, 1028, 1009, 989, 919, 906, 883, 809, 752s, 680, 666, 601, 510, 475, 463, 445, 432, 418, 405.

**HRMS** Calcd. for C<sub>37</sub>H<sub>65</sub>INO<sub>6</sub>Si [M+NH<sub>4</sub>]<sup>+</sup>  $m/z$  774.3620. Found: 774.3614.

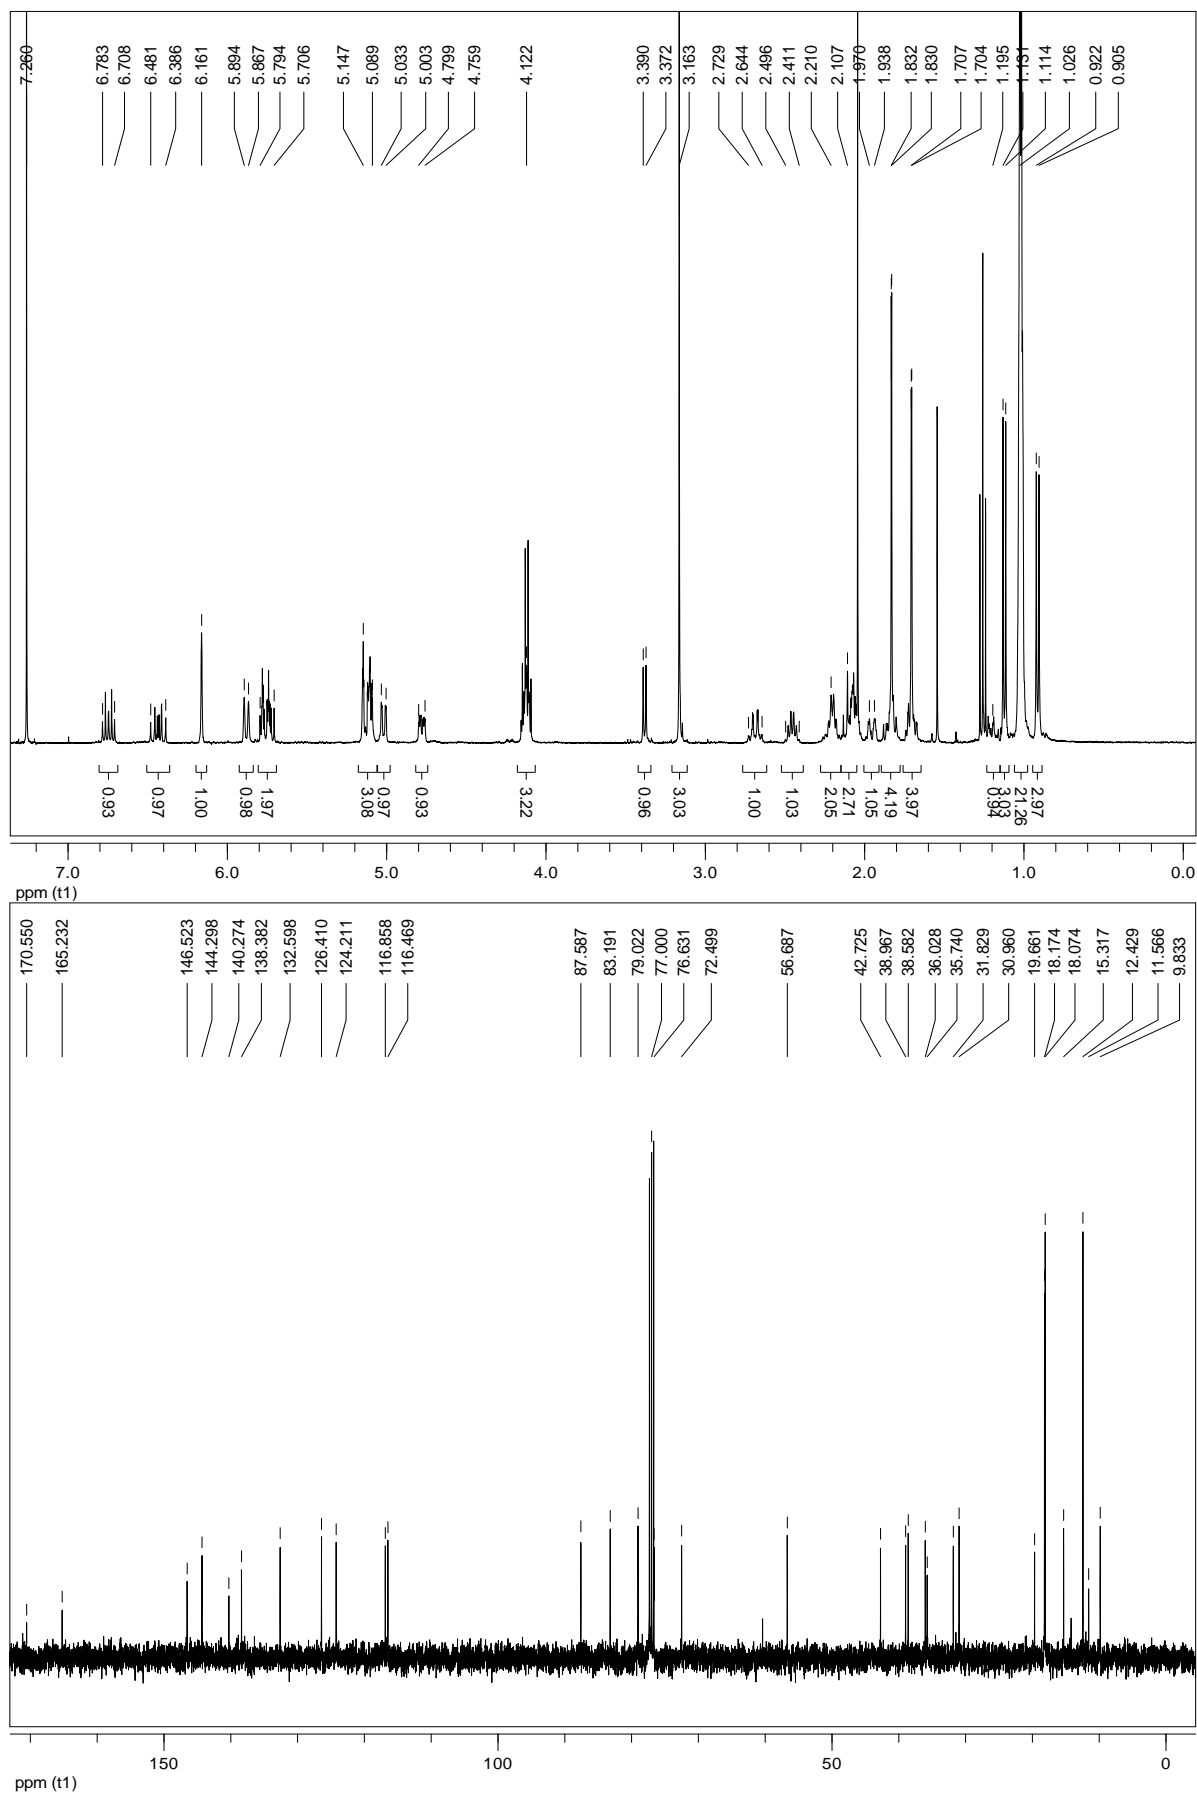

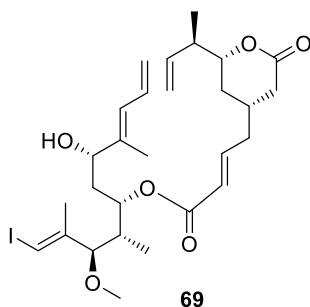

**(1*E*,3*R*,4*S*,5*S*,7*S*,8*E*)-7-hydroxy-1-iodo-3-methoxy-2,4,8-trimethylundeca-1,8,10-trien-5-yl (*E*)-4-((2*R*,4*R*)-2-((*R*)-but-3-en-2-yl)-6-oxotetrahydro-2*H*-pyran-4-yl)but-2-enoate (**70**):**

Using TBAF: To a solution of the TIPS-protected alcohol **5** (56.0 mg, 74.0  $\mu$ mol, 1.00 eq) in THF (1 mL) were added a solution of TBAF (1.0 M in THF, 0.30 mL, 0.300 mmol, 4.00 eq) and acetic acid (17  $\mu$ L, 0.296 mmol, 4.00 eq) at 0 °C. The cooling was removed after a few minutes and the mixture was stirred at rt overnight. As the conversion was incomplete, more TBAF (4 eq) and acetic acid (4 eq) were added at rt. After another 8 h at rt, the conversion was still incomplete. The reaction was quenched by addition of NH<sub>4</sub>Cl (sat. aq.). The aqueous phase was diluted with water, ether (10 mL) was added and the layers were separated. The aqueous phase was extracted with ether (2 $\times$ 10 mL). The combined organic extracts were washed with brine, dried over MgSO<sub>4</sub> and concentrated under reduced pressure. The crude was purified by column chromatography (hex:EtOAc 5:1 $\rightarrow$ 1:1) to afford the desired alcohol **70** (18.3 mg, 87% wt/wt along with EtOAc, 15.9 mg, 47%) as a colourless oil. Furthermore some starting material **5** was recovered (15.2 mg, 27%).

Using buffered HF\*Py: To a solution of the TIPS-protected alcohol **5** (52.4 mg, 69.2  $\mu$ mol, 1.00 eq) in THF (2.6 mL) and pyridine (0.76 mL) was added a solution of HF\*Py (1.53 mL 70% as HF, 1.18 g, 58.9 mmol, 850 eq) carefully at 0 °C. The cooling was removed after 10-15 min and the mixture was stirred at rt overnight. Afterwards the reaction was quenched into a mixture of NaHCO<sub>3</sub> (sat. aq., 40 mL) and Et<sub>2</sub>O (40 mL). As soon as the gas evolution had ceased, the layers were separated and the organic phase was washed with CuSO<sub>4</sub> (sat. aq., 5 mL) and water (2 $\times$ 10 mL). The combined aqueous layers were extracted with Et<sub>2</sub>O (10 mL). Afterwards the combined organic extracts were washed with brine, dried over MgSO<sub>4</sub> and concentrated under reduced pressure. The crude was purified by

column chromatography (hex:EtOAc 5:1→2:1), to afford the desired alcohol **70** (35.6 mg, 86%) as a colourless oil.

**TLC** (Hex:EtOAc 1:1):  $R_f$  = 0.46

**$^1\text{H-NMR}$**  ( $\text{CDCl}_3$ , 400.1 MHz):  $\delta$  = 6.89 (m<sub>c</sub>, 1H), 6.55 (m<sub>c</sub>, 1H), 6.19 (m<sub>c</sub>, 1H), 6.05 (pseudo d,  $J$  = 10.9 Hz, 1H), 5.89 (td,  $J$  = 1.3 Hz,  $J$  = 15.5 Hz, 1H), 5.74 (ddd,  $J$  = 7.7 Hz,  $J$  = 10.4 Hz,  $J$  = 17.3 Hz, 1H), 5.19 (dd,  $J$  = 1.8 Hz,  $J$  = 16.8 Hz, 1H), 5.24-5.02 (m, 5H), 4.18-4.07 (m, 1H), 3.88 (m<sub>c</sub>, 1H), 3.49 (d,  $J$  = 5.7 Hz, 1H), 3.16 (s, 3H), 2.76-2.64 (m, 1H), 2.54 (d,  $J$  = 3.6 Hz, 1H), 2.45 (m<sub>c</sub>, 1H), 2.30-2.21 (m, 2H), 2.19-2.05 (m, 2H), 2.02-1.92 (m, 2H), 1.77 (d,  $J$  = 1.0 Hz, 3H), 1.75 (d,  $J$  = 0.9 Hz, 3H), 1.73-1.60 (m, 2H), 1.28-1.16 (m, 1H), 1.12 (d,  $J$  = 6.8 Hz, 3H), 0.90 (d,  $J$  = 6.9 Hz, 3H).

**HRMS** Calcd. for  $\text{C}_{28}\text{H}_{41}\text{INaO}_6$   $[\text{M}+\text{Na}]^+$   $m/z$  623.1840. Found: 623.1839.

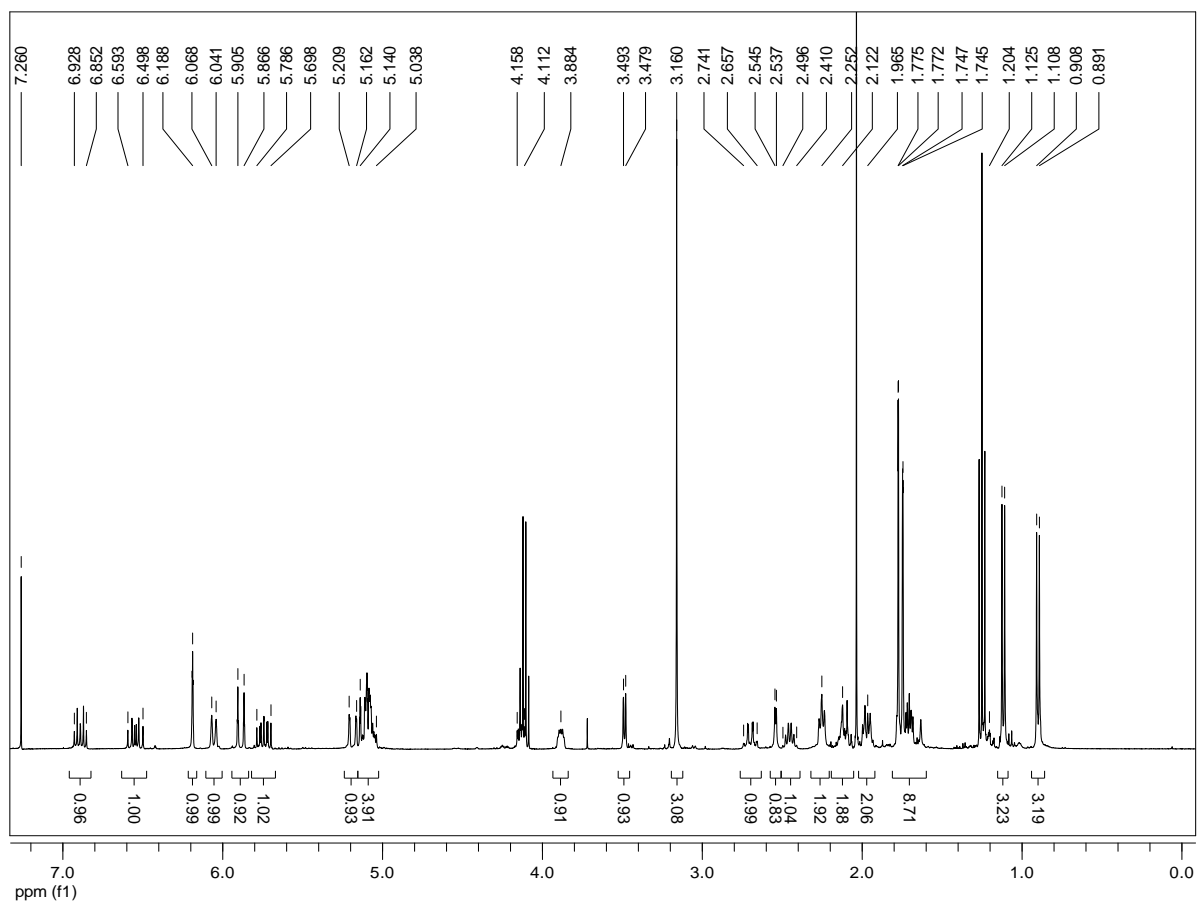

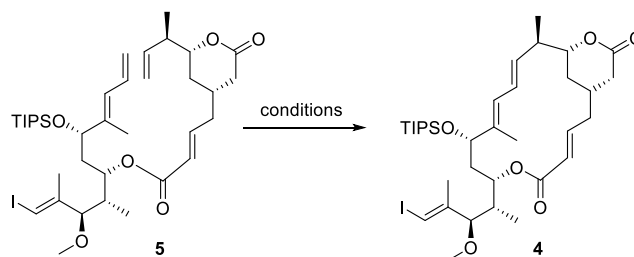

Representative procedure for initial single-batch test reactions:

To a solution of the catalyst (20 mol%) in CH<sub>2</sub>Cl<sub>2</sub> (4.5 mL) was added a solution of the ene-diene **5** (6.7 mg, 8.9 μmol, 1.00 eq) in CH<sub>2</sub>Cl<sub>2</sub> (0.5 mL, rinsed with 2×0.5 mL). After a few minutes stirring at rt, the pale brown solution was heated to 50 °C overnight. The conversion was assessed by ESI-MS and TLC.

Remark: The reaction was run in a microwave vial and the catalyst was weighed directly into the tube in a glovebox.

Representative procedure for catalyst-/solvent-/temperature screenings:

A stock solution of the ene-diene **5** in CH<sub>2</sub>Cl<sub>2</sub> was prepared such that 0.1 mL of the stock solution contained 2.0 mg of the substrate.

0.1 mL of the substrate stock solution was diluted with 1.7 mL of the solvent to be assessed. Then the respective catalyst stock solution in CH<sub>2</sub>Cl<sub>2</sub> (typically around 0.2 mL, corresponding to 20 mol%) was added. The conversion was assessed by ESI-MS from time-to-time. In most of the cases, the reaction mixtures were stirred overnight at the desired temperature, whereafter the conversion was re-assessed by ESI-MS. The samples that had been kept at rt were later heated.



**Table S1:** RCM screening for substrate 5

| entry | catalyst (mol%)       | solvent                         | Temp./°C | conversion <sup>[a]</sup> |
|-------|-----------------------|---------------------------------|----------|---------------------------|
| 1     | Hoveyda-Grubbs 1 (10) | tol                             | 90       | no                        |
| 2     | Hoveyda-Grubbs 1 (20) | CH <sub>2</sub> Cl <sub>2</sub> | 50       | no                        |
| 3     | Hoveyda-Grubbs 2 (20) | CH <sub>2</sub> Cl <sub>2</sub> | 50       | no                        |
| 4     | Hoveyda-Grubbs 2 (20) | tol                             | 95       | yes                       |
| 5     | Grubbs 1 (20)         | CH <sub>2</sub> Cl <sub>2</sub> | 50       | no                        |
| 6     | Grubbs 1 (20)         | tol                             | 95       | yes                       |
| 7     | Grubbs 2 (10)         | CH <sub>2</sub> Cl <sub>2</sub> | 50       | yes, incomplete           |
| 8     | Grubbs 2 (20)         | CH <sub>2</sub> Cl <sub>2</sub> | 50       | yes, full                 |
| 9     | Grubbs 2 (10)         | tol                             | rt       | no                        |
| 10    | Grubbs 2 (10)         | tol                             | 45       | no                        |
| 11    | Grubbs 2 (20)         | tol                             | 95       | yes                       |
| 12    | Grubbs 3 (20)         | tol                             | rt       | no                        |
| 13    | Grubbs 3 (20)         | CH <sub>2</sub> Cl <sub>2</sub> | rt       | no                        |
| 14    | Piers-Grubbs 2 (20)   | tol                             | rt       | no                        |
| 15    | Piers-Grubbs 2 (20)   | CH <sub>2</sub> Cl <sub>2</sub> | rt       | no                        |
| 16    | UHGS* (20)            | CH <sub>2</sub> Cl <sub>2</sub> | 40       | no                        |
| 17    | UHGS* (20)            | tol                             | 95       | no                        |

[a] consumption of starting material. Yes = complete consumption; no = no consumption. For incomplete conversion, the degree of the consumption of starting material was not quantified.

\*

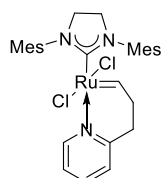

Ung, T.; Hejl, A.; Grubbs, R. H.; Schrodi, Y. Latent Ruthenium Olefin Metathesis Catalysts That Contain an N-Heterocyclic Carbene Ligand. *Organometallics* **2004**, 23, 5399-5401.

**Table S2:** RCM screening for substrate **70**

| entry | catalyst (20 mol%) | solvent                         | temp./°C | conversion <sup>[a]</sup> |
|-------|--------------------|---------------------------------|----------|---------------------------|
| 1     | Grubbs 1           | tol                             | 95       | no                        |
| 2     | Grubbs 2           | tol                             | 95       | full                      |
| 3     | Hoveyda-Grubbs 2   | tol                             | 95       | full                      |
| 4     | Grubbs 1           | CH <sub>2</sub> Cl <sub>2</sub> | 50       | no                        |
| 5     | Grubbs 2           | CH <sub>2</sub> Cl <sub>2</sub> | 50       | full                      |
| 6     | Hoveyda-Grubbs 2   | CH <sub>2</sub> Cl <sub>2</sub> | 50       | incomplete                |

[a] consumption of starting material. no = no consumption. For incomplete conversion, the degree of the consumption of starting material was not quantified.

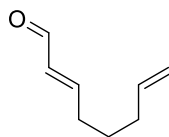**S15**

**(E)-Octa-2,7-dienal (S15):** To a slurry of celite (12 g) in CH<sub>2</sub>Cl<sub>2</sub> (55 mL) was added PCC (3.84 g, 17.8 mmol, 1.50 eq). To this was then added a solution of 2,7-octadienol (**71**) (1.50 g, 11.9 mmol, 1.00 eq) in CH<sub>2</sub>Cl<sub>2</sub> (5 mL) dropwise at rt, whereupon the mixture turned brown and thicker. After 2.5 h stirring at rt, the slurry was diluted with ether (100 mL) and filtered through a paper filter. The residue was washed thoroughly with ether and the combined filtrates were concentrated under reduced pressure (40 °C, 800–690 mbar) to leave a brown liquid. This was passed through a pad of silica washing with ether. The combined filtrates were again concentrated to yield aldehyde **S15** as a slightly green liquid (1.44 g, 84% wt/wt along with Et<sub>2</sub>O and CH<sub>2</sub>Cl<sub>2</sub>, 1.22 g, 82%), which was volatile.

**TLC** (Hex:EtOAc 5:1):  $R_f$  = 0.51

**<sup>1</sup>H-NMR** (CDCl<sub>3</sub>, 400.1 MHz):  $\delta$  = 9.51 (d,  $J$  = 7.9 Hz, 1H), 6.85 (td,  $J$  = 6.8 Hz,  $J$  = 15.6 Hz, 1H), 6.13 (tdd,  $J$  = 1.5 Hz,  $J$  = 7.9 Hz,  $J$  = 15.6 Hz, 1H), 5.79 (tdd,  $J$  = 6.7 Hz,  $J$  = 10.2 Hz,  $J$  = 16.9 Hz, 1H), 5.07-4.97 (m, 2H), 2.35 (mc, 2H), 2.11 (mc, 2H), 1.62 (mc, 2H).

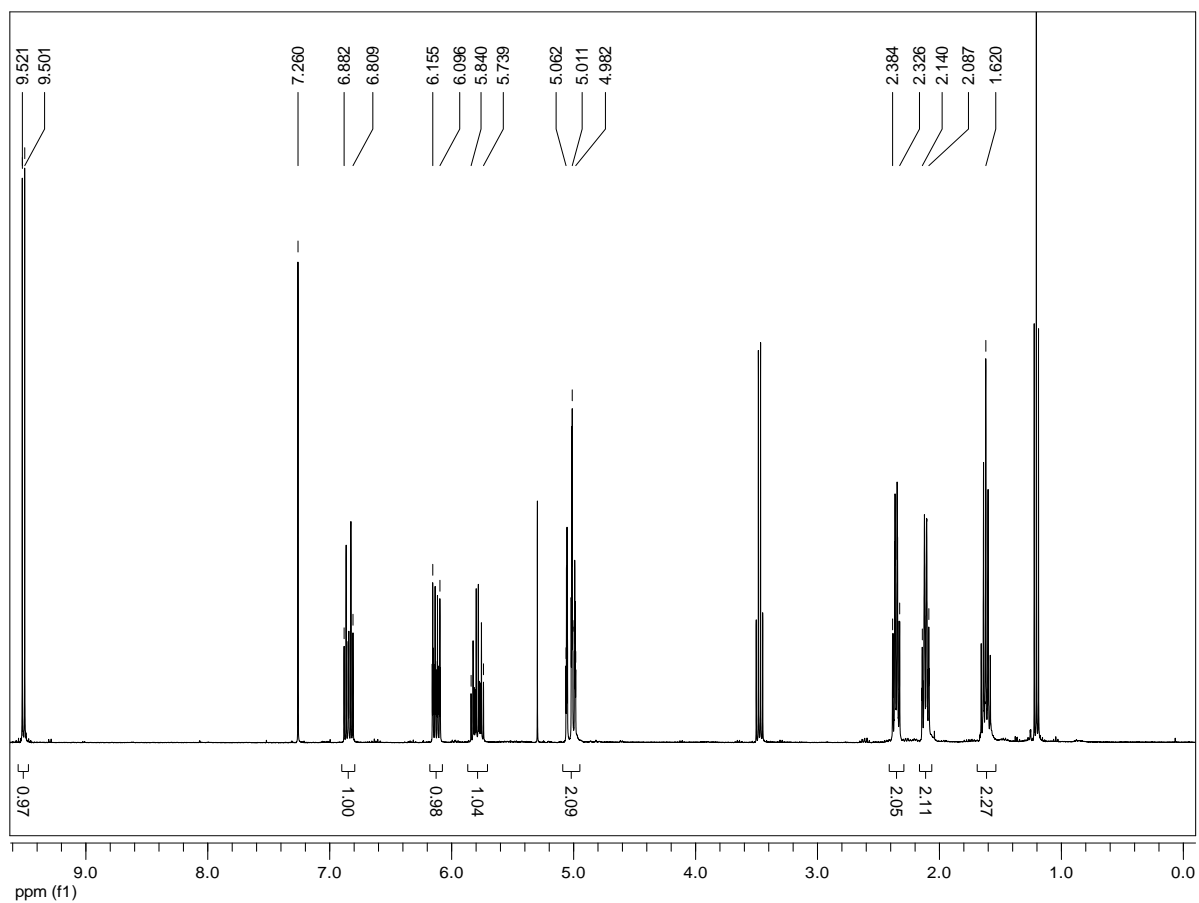

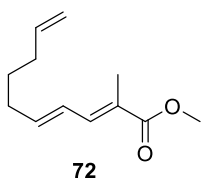

**Methyl (2E,4E)-2-methyldeca-2,4,9-trienoate (72):** To a solution of the phosphonium ylide **17** (3.41 g, 9.79 mmol, 1.00 eq) in CH<sub>2</sub>Cl<sub>2</sub> (15 mL) was added aldehyde **S15** (1.22 g, 9.82 mmol, 1.00 eq) dropwise at rt. Unlike in the corresponding reaction with acrolein (*vide supra*), the addition proceeded only slightly exothermic. The yellow solution was then heated to a gentle reflux (47 °C oil bath). TLC after 3 h 20 min showed, that the conversion was incomplete. Therefore, more ylid (682 mg, 0.2 eq) was added and the mixture was heated to reflux overnight. Despite some starting material still being left, the mixture was allowed to cool to rt and concentrated under reduced pressure. The crude was cooled to 0 °C and pentane was added. The precipitated phosphinoyl was filtered off and washed thoroughly with pentane. The combined filtrates were concentrated under reduced pressure and the remaining yellow liquid was purified by column chromatography (hex:EtOAc 10:1) to afford the desired diene **72** as a colourless liquid (1.14 g, 60%, *trans* only; 636 mg, *trans/cis* = 4/1, 33%).

**TLC** (hex:EtOAc 5:1):  $R_{f,cis}$  = 0.73;  $R_{f,trans}$  = 0.63

**<sup>1</sup>H-NMR** (CDCl<sub>3</sub>, 400.1 MHz):  $\delta$  = 7.16 (bd,  $J$  = 11.3 Hz, 1H, CH=CMe), 6.34 (tdd,  $J$  = 1.4 Hz,  $J$  = 11.3 Hz,  $J$  = 14.9 Hz, 1H, CH=CHCH<sub>2</sub>), 6.07 (td,  $J$  = 7.1 Hz,  $J$  = 15.0 Hz, 1H, CH=CHCH<sub>2</sub>), 5.80 (tdd,  $J$  = 6.7 Hz,  $J$  = 10.2 Hz,  $J$  = 16.9 Hz, 1H, CH<sub>2</sub>=CH), 5.07-4.93 (m, 2H, CH<sub>2</sub>=CH), 3.75 (s, 3H, OCH<sub>3</sub>), 2.21 (td,  $J$  = 7.2 Hz,  $J$  = 7.2 Hz, 2H, CH<sub>2</sub>CH=CH), 2.15-2.03 (m, 2H, CH<sub>2</sub>CH=CH<sub>2</sub>), 1.93 (d,  $J$  = 0.9 Hz, 3H, CH=CCH<sub>3</sub>), 1.62-1.47 (m, 2H, CH<sub>2</sub>CH<sub>2</sub>CH<sub>2</sub>),

**<sup>13</sup>C-NMR** (CDCl<sub>3</sub>, 100.6 MHz):  $\delta$  = 169.1, 142.8, 138.8, 138.3, 126.2, 124.9, 114.9, 51.7, 33.2, 32.6, 28.1, 12.6.

**IR** (v/[cm<sup>-1</sup>]) 3078, 3034, 2994, 2980, 2948, 2928, 2857, 1707 (s), 1640, 1610, 1435, 1389, 1292, 1266, 1235 (s), 1191, 1104, 970, 940, 911, 831, 748, 689, 634, 552, 489, 457, 441, 424.

**HRMS** Calcd. for C<sub>12</sub>H<sub>19</sub>O<sub>2</sub> [M+H]<sup>+</sup>  $m/z$  195.1380. Found: 195.1378.

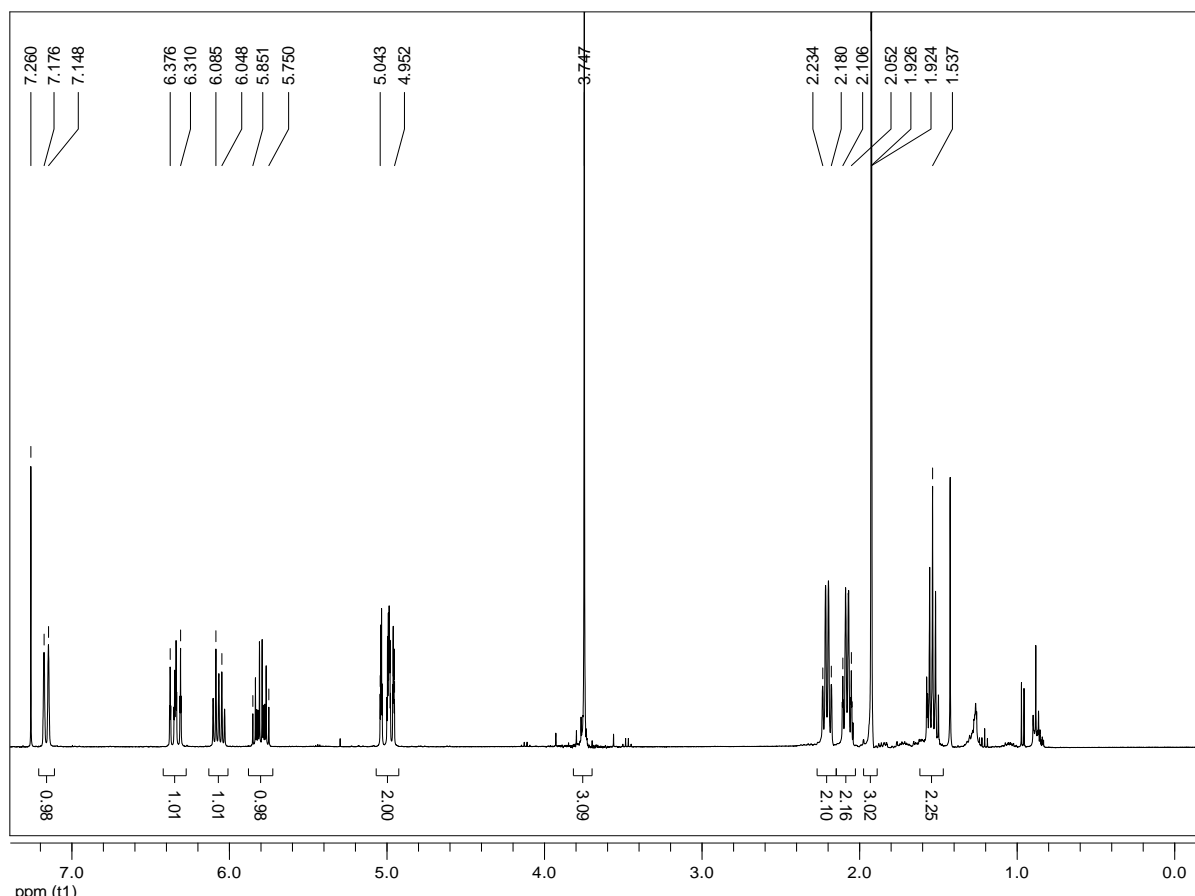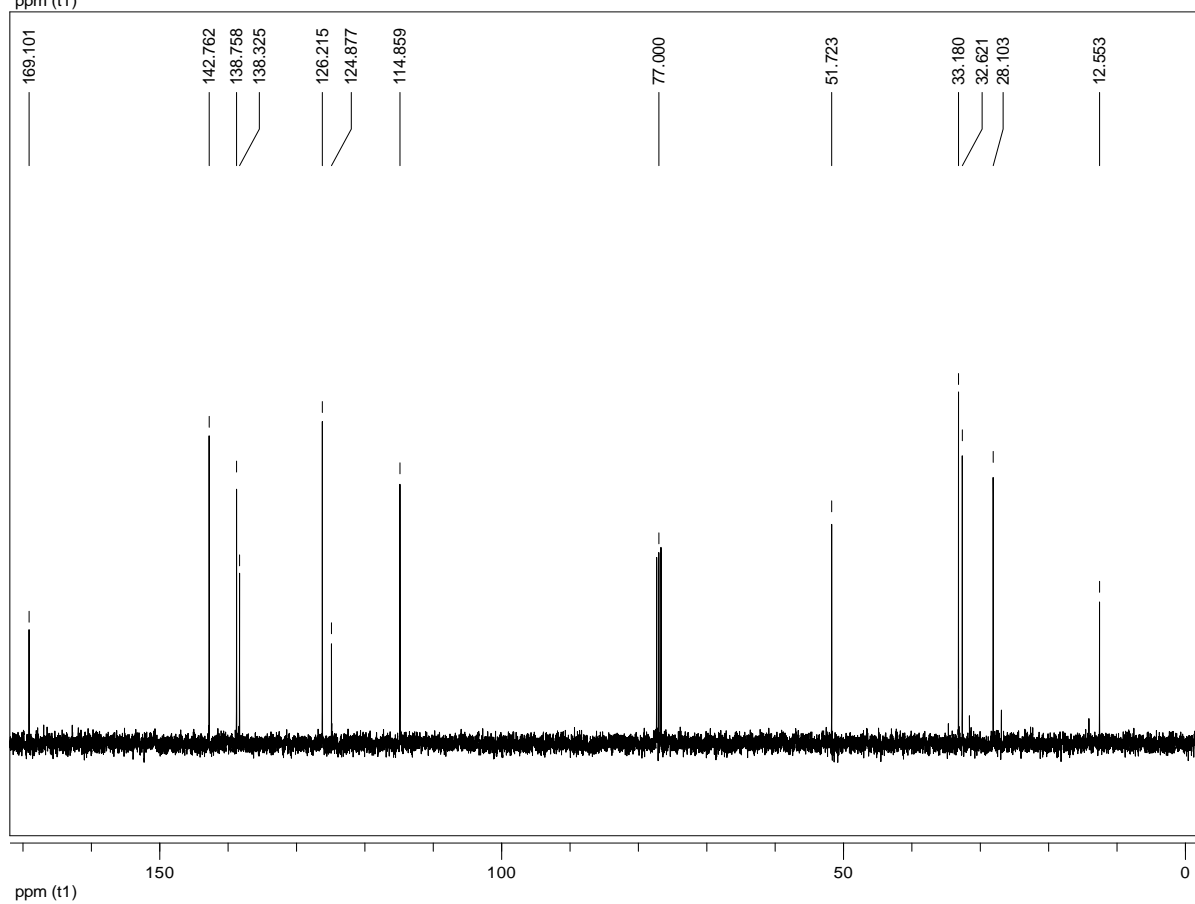

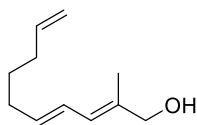**S16**

**(2E,4E)-2-Methyldeca-2,4,9-trien-1-ol (S16):** To a cooled (0 °C) solution of the ester **72** (1.12 g, 5.75 mmol, 1.00 eq) in Et<sub>2</sub>O (30 mL) was added LiAlH<sub>4</sub> (218 mg, 5.75 mmol, 1.00 eq) in one portion. The mixture was stirred at 0 °C for 50 min. Afterwards the reaction was quenched with water (10 mL) followed by 1 M NaOH (10 mL) and more water (30 mL). The layers were separated, additional 1 M NaOH was added and the aqueous phase was extracted with Et<sub>2</sub>O (3×20 mL). The combined organic extracts were washed with brine, dried over MgSO<sub>4</sub> and concentrated under reduced pressure to afford the desired alcohol **S16** (895 mg, 94%) as a colourless liquid.

**TLC** (hex:EtOAc 5:1): R<sub>f</sub> = 0.24.

**<sup>1</sup>H-NMR** (CDCl<sub>3</sub>, 400.1 MHz): δ = 6.26 (tdd, *J* = 1.4 Hz, *J* = 10.8 Hz, *J* = 15.0 Hz, 1H), 6.02 (bd, *J* = 10.8 Hz, 1H), 5.81 (tdd, *J* = 6.7 Hz, *J* = 10.2 Hz, *J* = 16.9 Hz, 1H), 5.69 (mc, 1H), 5.06-4.91 (m, 2H), 4.06 (d, *J* = 5.8 Hz, 2H), 2.18-2.02 (m, 4H), 1.78 (bs, 3H), 1.50 (mc, 2H), 1.38-1.30 (m, 1H).

**<sup>13</sup>C-NMR** (CDCl<sub>3</sub>, 100.6 MHz): δ = 138.7, 134.8, 134.7, 126.2, 125.3, 114.6, 68.7, 33.2, 32.3, 28.6, 14.1; **IR** (ν/[cm<sup>-1</sup>]) 3323 (br), 3077, 3026, 2978, 2924, 2856, 1640, 1453, 1438, 1415, 1388, 1225, 1143, 1066, 996 (s), 966 (s), 909 (s), 883, 668, 635, 610, 456, 448.

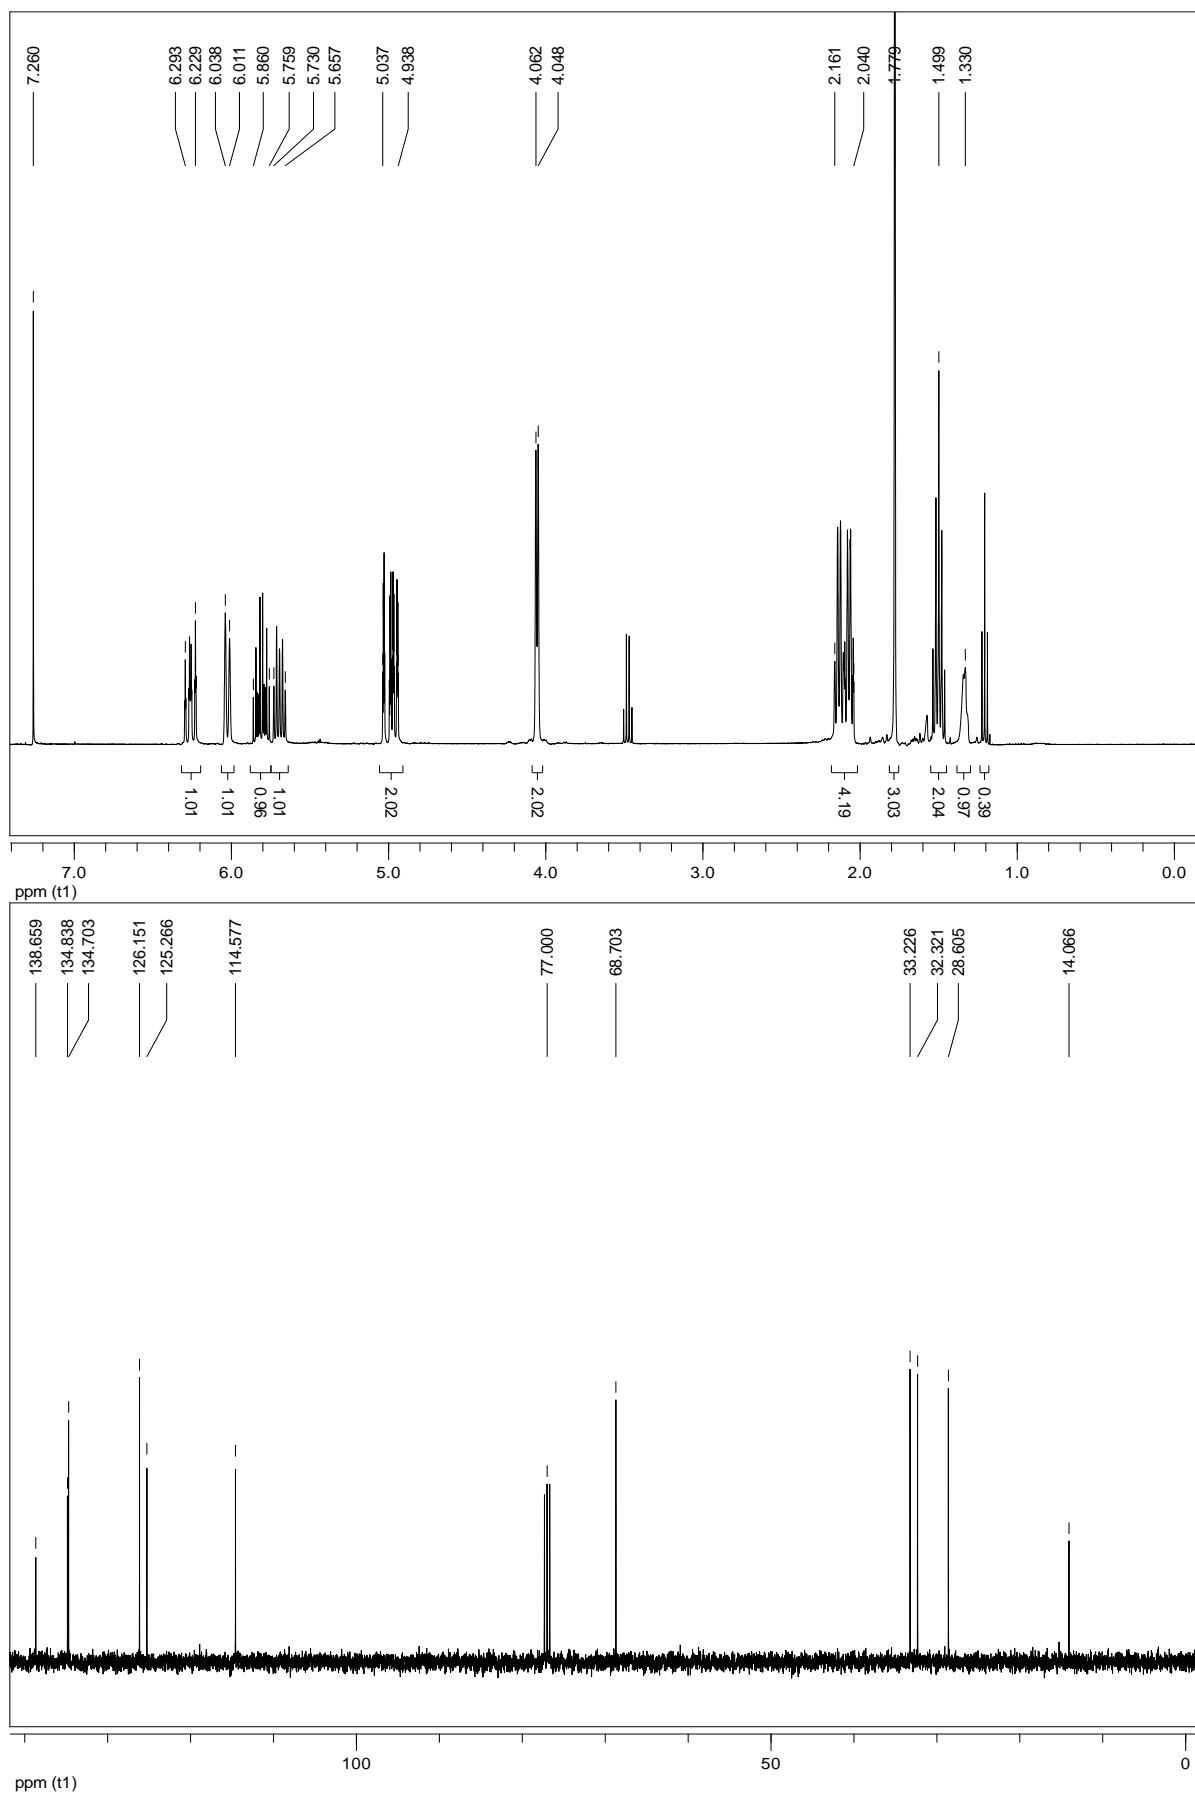



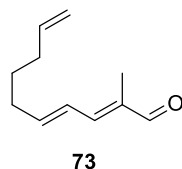

**(2E,4E)-2-Methyldeca-2,4,9-trienal (73):** To a solution of the allylic alcohol **S16** (150 mg, 0.902 mmol, 1.00 eq) in CH<sub>2</sub>Cl<sub>2</sub> (3 mL) were added molecular sieves (3 Å, beads) and activated MnO<sub>2</sub> (1.57 g, 18.0 mmol, 20.0 eq) at rt. The suspension was stirred for 2 h at the same temperature. Afterwards it was filtered through a pad of celite, topped with a few mm of silica. The filter was washed thoroughly with Et<sub>2</sub>O. The combined filtrates were concentrated under reduced pressure and the crude aldehyde **73** (161 mg, 86% wt/wt along with Et<sub>2</sub>O and CH<sub>2</sub>Cl<sub>2</sub>, 139 mg, 85%), a pale yellow liquid, was used directly in the next step.

**TLC** (hex:EtOAc 5:1): R<sub>f</sub> = 0.48

**<sup>1</sup>H-NMR** (CDCl<sub>3</sub>, 400.1 MHz): δ = 9.42 (s, 1H), 6.82 (bd, *J* = 11.1 Hz, 1H), 6.53 (tdd, *J* = 1.4 Hz, *J* = 11.1 Hz, *J* = 15.0 Hz, 1H), 6.23 (td, *J* = 7.1 Hz, *J* = 15.0 Hz, 1H), 5.81 (tdd, *J* = 6.7 Hz, *J* = 10.2 Hz, *J* = 16.9 Hz, 1H), 5.07-4.96 (m, 2H), 2.27 (td, *J* = 7.4 Hz, *J* = 7.4 Hz, 2H), 2.10 (m<sub>c</sub>, 2H), 1.83 (d, *J* = 0.8 Hz, 3H), 1.58 (m<sub>c</sub>, 2H).

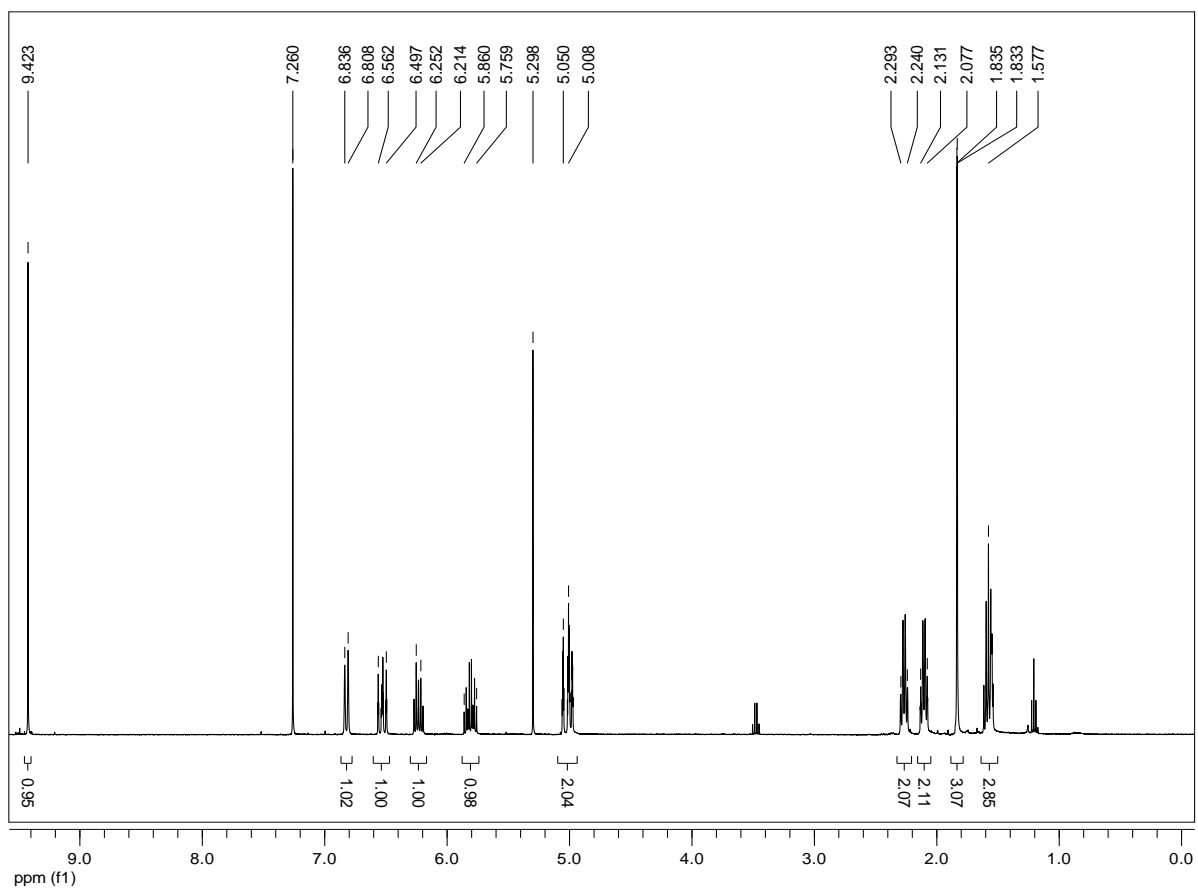

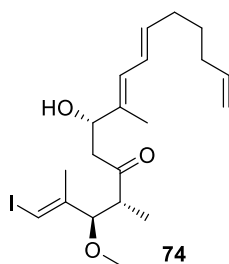

**(1*E*,3*R*,4*R*,7*S*,8*E*,10*E*)-7-Hydroxy-1-iodo-3-methoxy-2,4,8-trimethylhexadeca-**

**1,8,10,15-tetraen-5-one (74):** To a cooled ( $-78\text{ }^{\circ}\text{C}$ ) solution of (+)-DIP-Cl (227 mg, 0.709 mmol, 2.00 eq) in  $\text{CH}_2\text{Cl}_2$  (1 mL) was added  $\text{NEt}_3$  (0.118 mL, 0.851 mmol, 2.40 eq) followed by a solution of the ketone **27** (523 mg, 1.85 mmol, 1.00 eq) in  $\text{CH}_2\text{Cl}_2$  (0.4 mL, rinsed with  $2 \times 0.3\text{ mL}$ ). Ca. 5 min following the addition of the ketone, a white precipitate formed. The thick suspension was stirred for 3 h 15 min at  $-78\text{ }^{\circ}\text{C}$ . Afterwards a solution of the aldehyde **73** (132 mg, 0.804 mmol, 2.27 eq) in  $\text{CH}_2\text{Cl}_2$  (1 mL) was added slowly, whereupon the colour immediately turned bright yellow. The mixture was stirred overnight, allowing for the cooling bath to warm to  $-20\text{ }^{\circ}\text{C}$ . The reaction was then quenched with pH 7 phosphate buffer and the layers were separated. The aqueous phase was diluted with water and extracted with  $\text{CH}_2\text{Cl}_2$  ( $3 \times 30\text{ mL}$ ). The combined extracts were concentrated under reduced pressure. The residue was dissolved in MeOH (2 mL) and pH 7 phosphate buffer (0.4 mL) was added. The mixture was cooled to  $0\text{ }^{\circ}\text{C}$  and  $\text{H}_2\text{O}_2$  (30%, 0.5 mL) was added. The cooling was removed after a few minutes and the mixture was stirred for 1 h at rt. Afterwards it was poured into water (30 mL).  $\text{CH}_2\text{Cl}_2$  was added and the layers were separated. The aqueous phase was extracted with  $\text{CH}_2\text{Cl}_2$  ( $3 \times 10\text{ mL}$ ). The combined organic layers were washed with brine, dried over  $\text{MgSO}_4$  and concentrated under reduced pressure. The crude was purified by column chromatography (hex:EtOAc 10:1 $\rightarrow$ 5:1) to afford the desired product **74** (245 mg, 44% wt/wt along with isopinocampheol, 107 mg, 68%, dr=7.2:1) as a nearly colourless oil.

**$^1\text{H-NMR}$**  ( $\text{CDCl}_3$ , 400.1 MHz):  $\delta$  = 6.28-6.17 (m, 2H), 6.07 (mc, 1H), 5.80 (tdd,  $J$  = 6.7 Hz,  $J$  = 10.2 Hz,  $J$  = 16.9 Hz, 1H), 5.70 (td,  $J$  = 7.1 Hz,  $J$  = 14.9 Hz, 1H), 5.00 (ddd,  $J$  = 1.6 Hz,  $J$  = 3.6 Hz,  $J$  = 17.1 Hz, 1H), 4.95 (tdd,  $J$  = 1.2 Hz,  $J$  = 2.2 Hz,  $J$  = 10.2 Hz, 1H), 4.44 (mc, 1H), 3.84 (d,  $J$  = 7.0 Hz, 1H), 3.21 (s, 3H), 2.83 (d,  $J$  = 2.9 Hz, 1H), 2.76 (p,  $J$  = 7.0 Hz, 1H), 2.72-2.60 (m, 1H), 2.57-2.50 (m, 1H), 2.16-2.02 (m, 4H), 1.75 (d,  $J$  = 1.1 Hz, 3H), 1.73 (d,  $J$  = 0.9 Hz, 3H), 1.49 (mc, 2H), 1.12 (d,  $J$  = 6.9 Hz, 3H).

**<sup>13</sup>C-NMR** (CDCl<sub>3</sub>, 100.6 MHz):  $\delta$  = 212.7, 145.3, 138.6, 135.3, 135.2, 126.0, 125.5, 114.6, 86.3, 80.6, 72.3, 57.0, 50.1, 47.7, 33.2, 32.3, 28.6, 19.9, 12.8, 12.2.

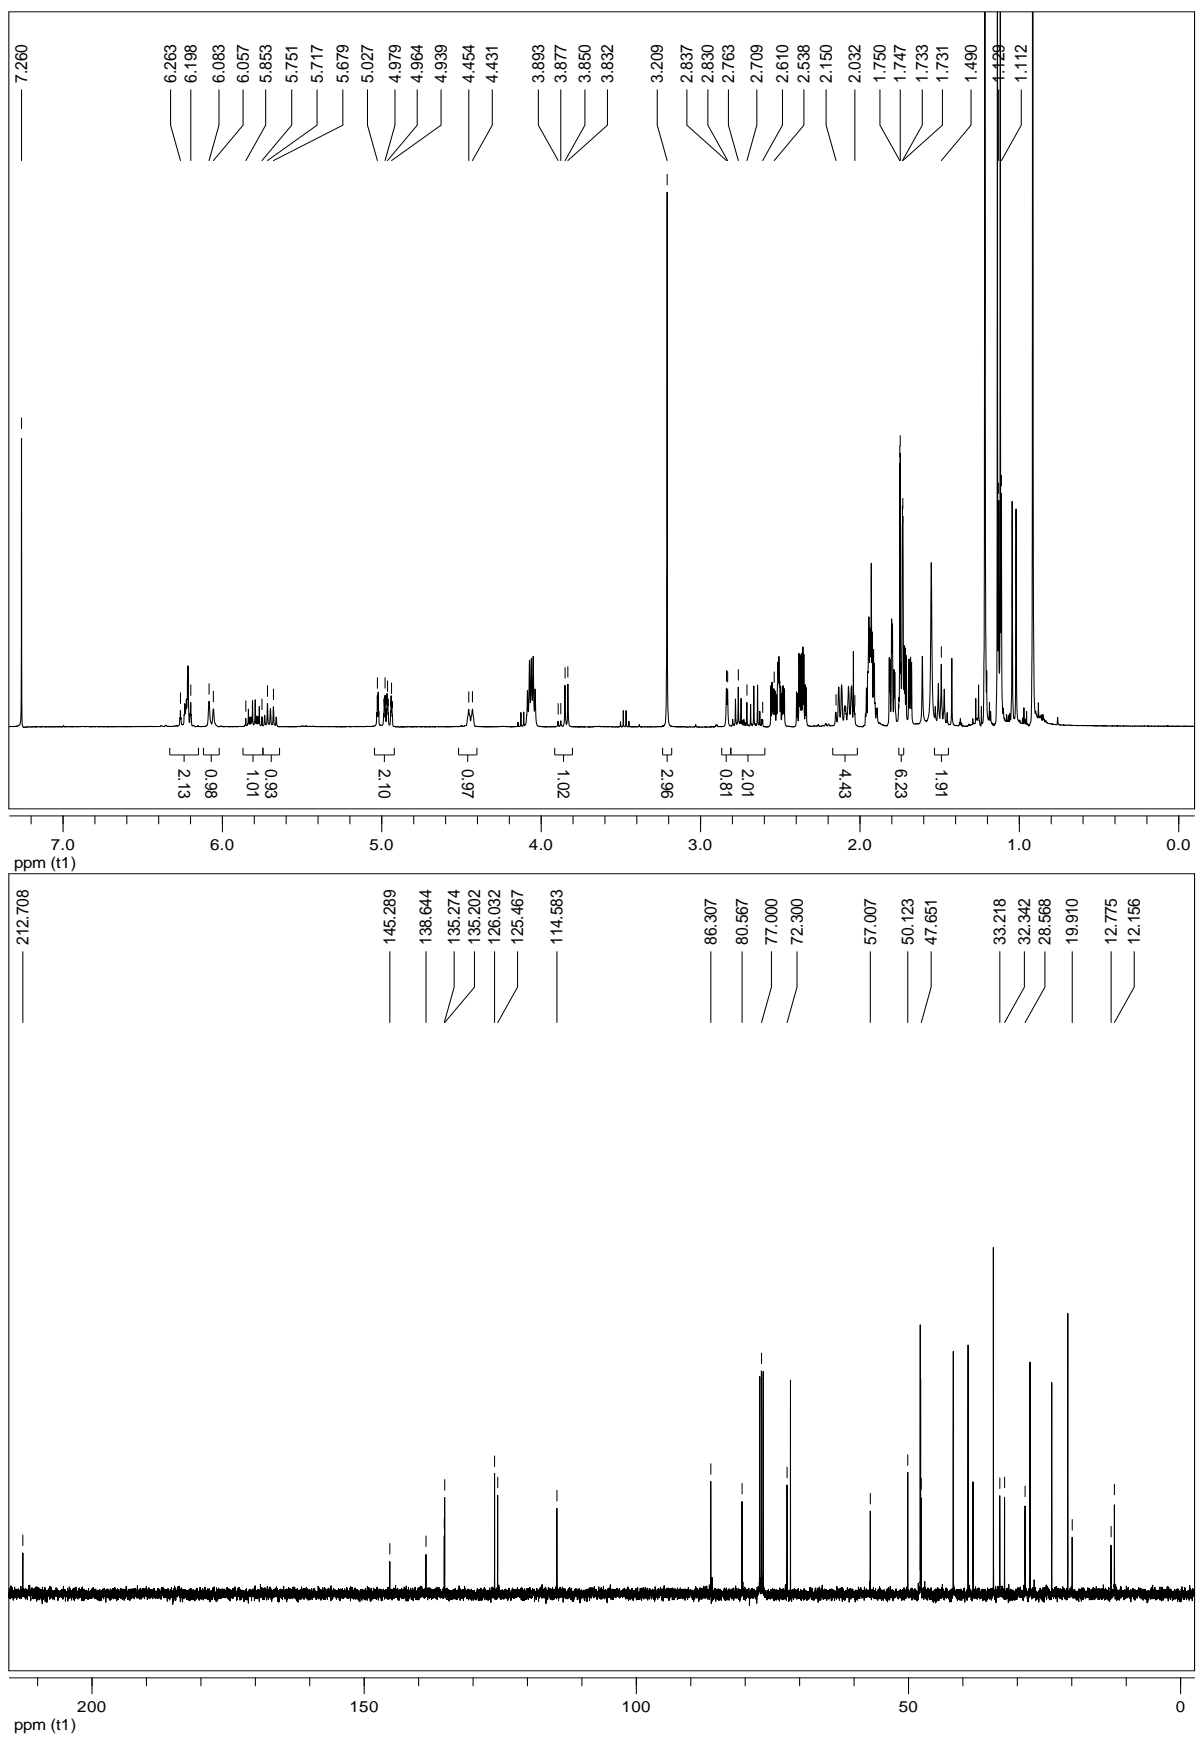

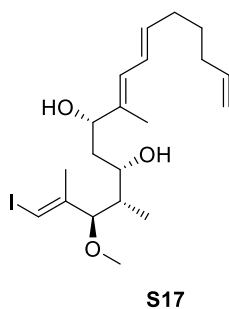

**(1E,3R,4S,5S,7S,8E,10E)-1-iodo-3-methoxy-2,4,8-trimethylhexadeca-1,8,10,15-tetraene-5,7-diol (S17):** A solution of tetramethylammonium triacetoxyborohydride (283 mg, 1.08 mmol, 4.65 eq) in MeCN (2.5 mL) and AcOH (2.5 mL) was cooled to  $-40\text{ }^{\circ}\text{C}$  (MeCN/dry ice). To the frozen mixture was added a solution of the ketone **74** (103 mg, 0.231 mmol, 1.00 eq) in MeCN (0.6 mL, rinsed with  $2\times 0.6\text{ mL}$ ). The resulting mixture was allowed to stand a few min. at the same temperature and was then aged in a freezer ( $-18\text{ }^{\circ}\text{C}$ ) for 19 h. Afterwards the suspension was allowed to warm to rt and stirred for another 1.5 h. Then the reaction was quenched with *Rochelle* salt (sat. aq.). The so obtained thick slurry was stirred for 2 h 15 min. Afterwards it was transferred with water (ca. 80 mL) into an *Erlenmeyer* flask, then  $\text{CH}_2\text{Cl}_2$  (20 mL) and  $\text{NaHCO}_3$  (s, 3.7 g) were added. Once the gas evolution had stopped, the layers were separated and the aqueous phase was extracted with  $\text{CH}_2\text{Cl}_2$  ( $3\times 10\text{ mL}$ ). The combined organic extracts were washed with brine, dried over  $\text{MgSO}_4$  and concentrated under reduced pressure. The crude was purified by column chromatography (hex:Et<sub>2</sub>O 2:1 $\rightarrow$ 1:1) to afford the desired product **S17** (94.0 mg, 94% wt/wt along with isopinocampheol, 88.6 mg, 86%, dr = 7.8:1 from previous aldol). Despite the fact that still some isopinocampheol was left, the material was taken forward to the next step.

**TLC** (hex:EtOAc 2:1):  $R_f$  = 0.38

**$^1\text{H-NMR}$**  ( $\text{CDCl}_3$ , 400.1 MHz):  $\delta$  = 6.32-6.20 (m, 1H), 6.19-6.07 (m, 2H), 5.81 (tdd,  $J$  = 6.7 Hz,  $J$  = 10.2 Hz,  $J$  = 16.9 Hz, 1H), 5.70 (mc, 1H), 5.01 (ddd,  $J$  = 1.6 Hz,  $J$  = 3.7 Hz,  $J$  = 17.1 Hz, 1H), 4.96 (tdd,  $J$  = 1.2 Hz,  $J$  = 2.2 Hz,  $J$  = 10.2 Hz, 1H), 4.37 (td,  $J$  = 3.7 Hz,  $J$  = 7.4 Hz, 1H), 3.96 (bd, ,  $J$  = 3.2 Hz, 1H), 3.86-3.77 (m, 1H), 3.27 (s, 3H), 3.23 (d,  $J$  = 5.9 Hz, 1H), 2.54 (d,  $J$  = 4.0 Hz, 1H), 2.17-2.03 (m, 4H), 1.82-1.67 (m, 3H), 1.76 (d,  $J$  = 1.0 Hz, 3H), 1.73 (bs, 3H), 1.50 (td,  $J$  = 7.4 Hz,  $J$  = 14.9 Hz, 2H), 0.84 (d,  $J$  = 7.1 Hz, 3H).

**$^{13}\text{C-NMR}$**  ( $\text{CDCl}_3$ , 100.6 MHz):  $\delta$  = 145.3, 138.7, 137.2, 134.8, 126.1, 124.6, 114.6, 86.5, 78.1, 74.3, 71.3, 57.3, 40.7, 38.6, 33.3, 32.4, 28.6, 21.8, 13.1, 10.9.

**HRMS** Calcd. for  $C_{20}H_{33}INaO_3$   $[M+Na]^+$   $m/z$  471.1367. Found: 471.1368.

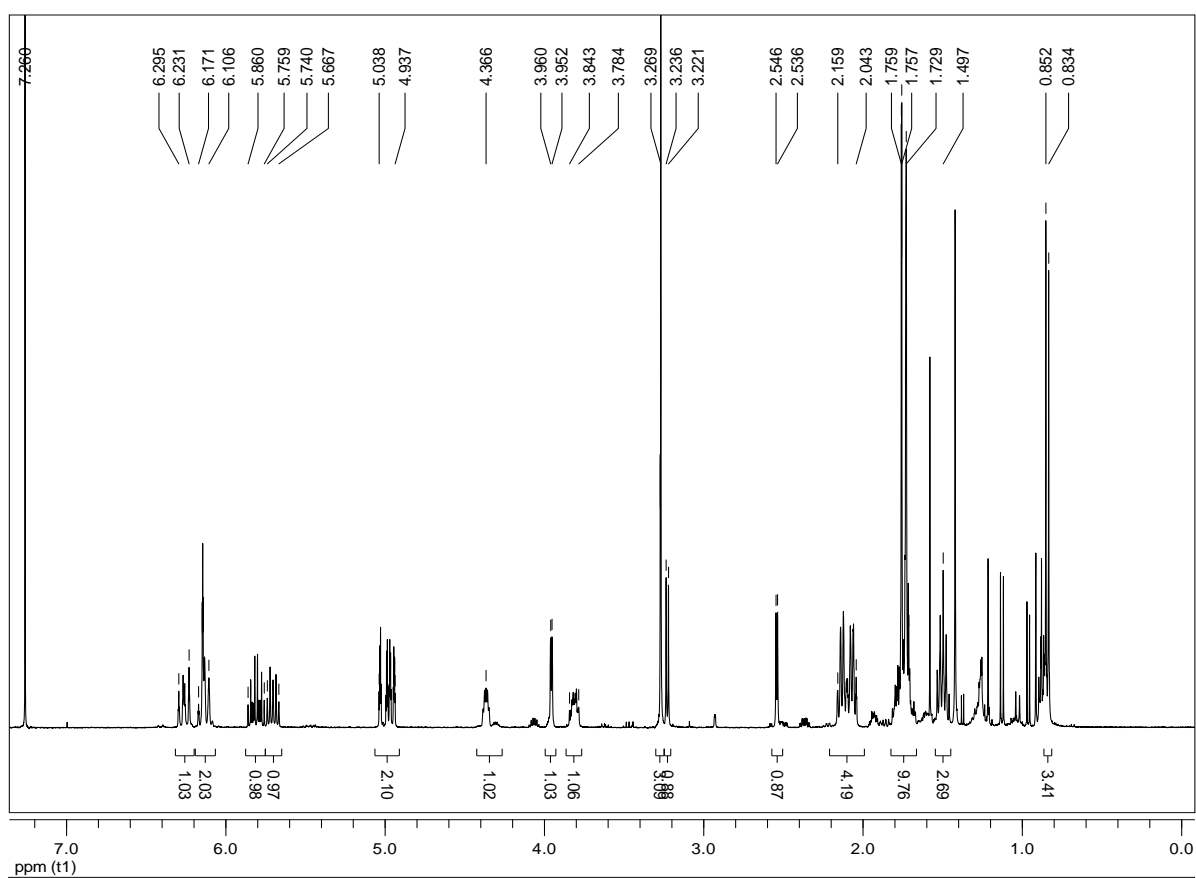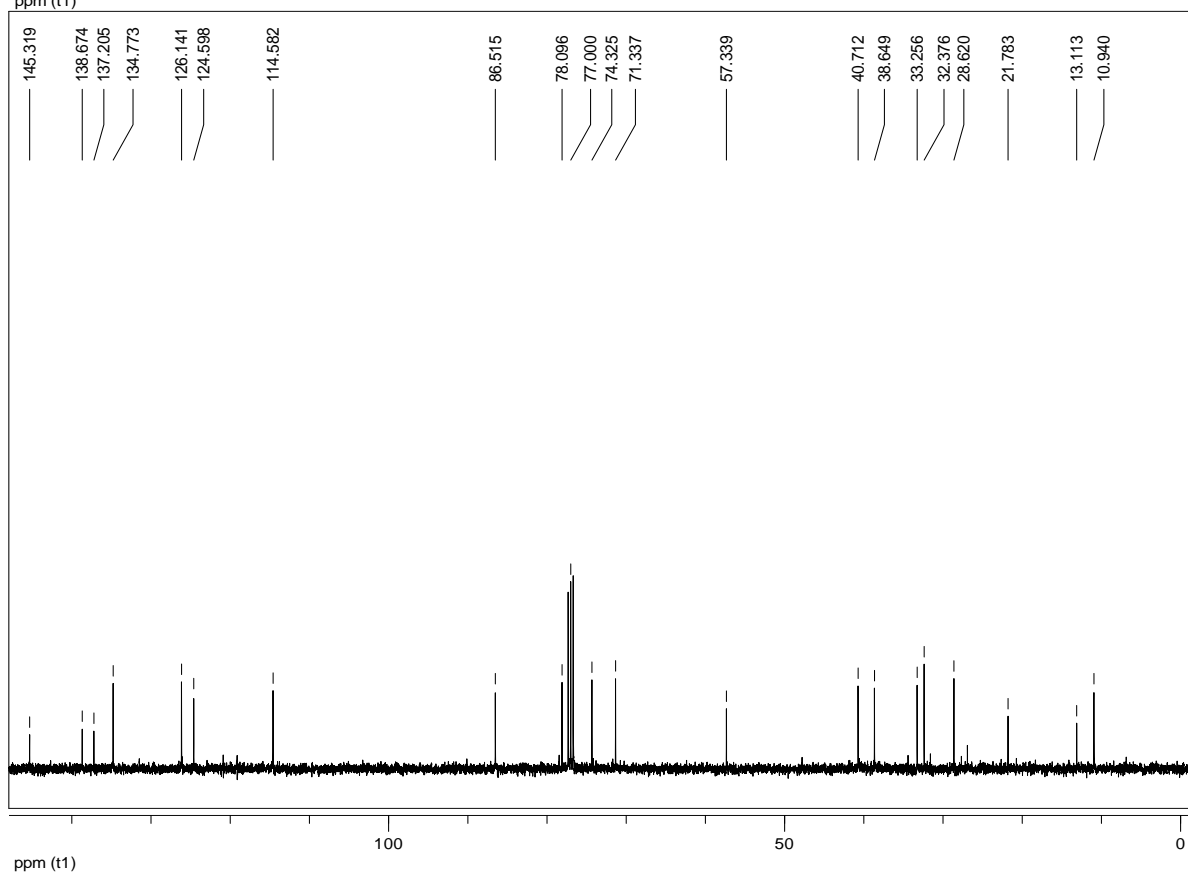

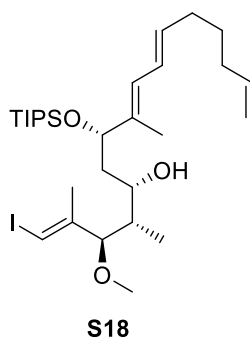

**(1*E*,3*R*,4*S*,5*S*,7*S*,8*E*,10*E*)-1-iodo-3-methoxy-2,4,8-trimethyl-7-((triisopropylsilyl)oxy)hexadeca-1,8,10,15-tetraen-5-ol (S18):** To a solution of the secondary alcohol **S17** (88.6 mg, 0.198 mmol, 1.00 eq) in CH<sub>2</sub>Cl<sub>2</sub> (5.5 mL) over molecular sieves (3 Å beads) was added 2,6-lutidine (115 µL, 0.988 mmol, 5.00 eq) at rt. The mixture was stirred at rt for 5 min, then it was cooled to -78 °C and, after another 5 min stirring, TIPSOTf (61.0 µL, 0.227 mmol, 1.15 eq) was added. After 20 min the reaction was quenched with NaHCO<sub>3</sub> (sat. aq.). The layers were separated and the aqueous phase was extracted with CH<sub>2</sub>Cl<sub>2</sub> (10 mL). Then the combined organic extracts were washed with brine, dried over MgSO<sub>4</sub> and the solvent was removed under reduced pressure. The crude was purified by column chromatography (hex:Et<sub>2</sub>O 7:1) to afford the desired product **S18** as a colourless oil (102 mg, 85%). <sup>1</sup>H-NMR analysis revealed, that three isomers were present, but it was impossible to distinguish the TIPS-regioisomer and the diastereoisomers. In total, the ratio of desired vs. undesired was around 6/1 (see signal at 4.47 ppm).

**TLC** (hex:EtOAc 5:1): R<sub>f</sub> = 0.57

**<sup>1</sup>H-NMR** (CDCl<sub>3</sub>, 400.1 MHz): δ = 6.32-6.18 (m, 1H), 6.18-6.01 (m, 2H), 5.82 (tdd, *J* = 6.7 Hz, *J* = 10.2 Hz, *J* = 16.9 Hz, 1H), 5.65 (m<sub>c</sub>, 1H), 5.01 (ddd, *J* = 1.6 Hz, *J* = 3.7 Hz, *J* = 17.1 Hz, 1H), 4.95 (tdd, *J* = 1.2 Hz, *J* = 2.2 Hz, *J* = 10.2 Hz, 1H), 4.7 (m<sub>c</sub>, 1H), 3.75-3.65 (m, 2H), 3.60 (d, *J* = 2.3 Hz, 1H), 3.21 (s, 3H), 2.18-2.02 (m, 4H), 1.78-1.63 (m, 3H), 1.73 (d, *J* = 1.0 Hz, 3H), 1.69 (bs, 3H), 1.51 (m<sub>c</sub>, 2H), 1.11-1.02 (m, 21H), 0.84 (d, *J* = 7.0 Hz, 3H).

**<sup>13</sup>C-NMR** (CDCl<sub>3</sub>, 100.6 MHz): δ = 146.3, 138.8, 135.7, 134.2, 126.2, 125.3, 114.5, 86.5, 78.0, 76.5, 69.7, 57.2, 41.2, 38.1, 33.3, 32.4, 28.6, 21.0, 18.05, 18.01, 13.8, 12.3, 10.1.

**HRMS** Calcd. for C<sub>29</sub>H<sub>53</sub>INaO<sub>3</sub>Si [M+Na]<sup>+</sup> *m/z* 627.2701. Found: 627.2696.



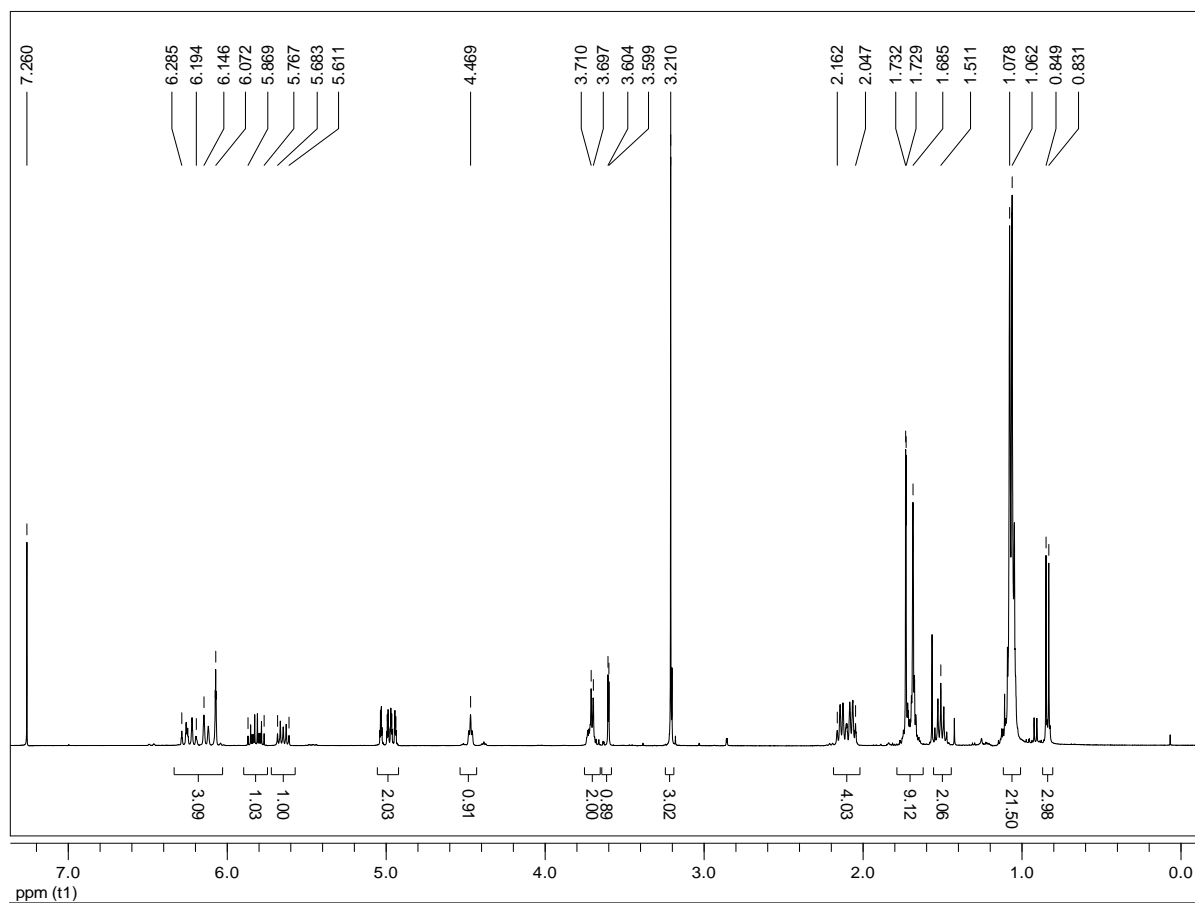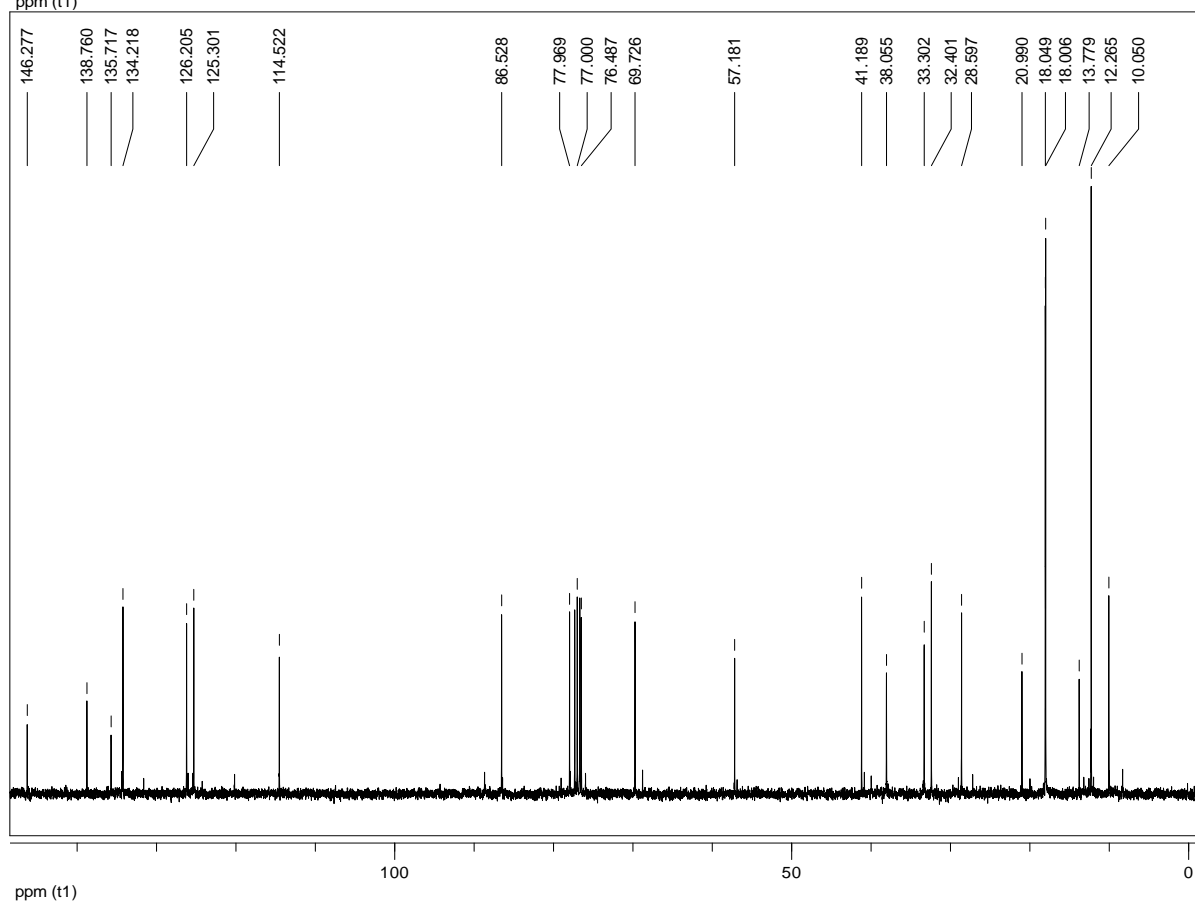

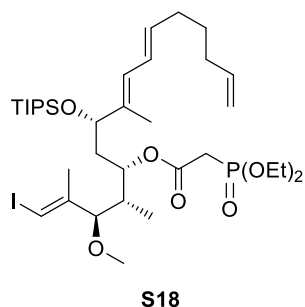

**(1*E*,3*R*,4*S*,5*S*,7*S*,8*E*,10*E*)-1-iodo-3-methoxy-2,4,8-trimethyl-7-((triisopropylsilyl)oxy)hexadeca-1,8,10,15-tetraen-5-yl 2-(diethoxyphosphoryl)acetate (75):** To a cooled (0 °C) solution of diethylphosphonoacetic acid (**55**) (36.0  $\mu$ L, 1.11 mmol, 1.50 eq) in CH<sub>2</sub>Cl<sub>2</sub> (2 mL) over molecular sieves (beads, 3 Å) was added CME-carbodiimide (114 mg, 0.268 mmol, 1.80 eq). The mixture was stirred at 0 °C for 10-15 min, then a solution of the alcohol **S18** (90.0 mg, 0.149 mmol, 1.00 eq) in CH<sub>2</sub>Cl<sub>2</sub> (0.8 mL, rinsed with 2×0.6 mL) was added. The cooling was removed and DMAP (1.8 mg, 10 mol%) was added a few minutes later. A precipitate had formed already before the addition of DMAP. TLC after 45 min indicated full conversion. The mixture was concentrated under reduced pressure and the crude was purified by column chromatography (hex:EtOAc 2:1→1:1) to afford the desired ester **75** (95.7 mg, 82%) as a colourless oil.

**TLC** (hex:EtOAc 1:1):  $R_f$  = 0.61

**<sup>1</sup>H-NMR** (CDCl<sub>3</sub>, 400.1 MHz):  $\delta$  = 6.22-6.08 (m, 2H), 5.89-5.71 (m, 2H), 5.62 (td,  $J$  = 7.1 Hz,  $J$  = 15.0 Hz, 1H), 5.00 (ddd,  $J$  = 1.6 Hz,  $J$  = 3.6 Hz,  $J$  = 17.1 Hz, 1H), 4.94 (tdd,  $J$  = 1.2 Hz,  $J$  = 2.2 Hz,  $J$  = 10.2 Hz, 1H), 4.75 (ddd,  $J$  = 1.4 Hz,  $J$  = 4.5 Hz,  $J$  = 10.3 Hz, 1H), 4.23-3.99 (m, 5H), 3.42 (d,  $J$  = 6.7 Hz, 1H), 3.16 (s, 3H), 2.77 (ddd,  $J$  = 14.3 Hz,  $J$  = 21.5 Hz,  $J$  = 41.5 Hz, 2H), 2.15-1.93 (m, 5H), 1.89-1.76 (m, 1H), 1.80 (d,  $J$  = 1.0 Hz, 3H), 1.72-1.61 (m, 1H), 1.68 (d,  $J$  = 0.6 Hz, 3H), 1.47 (mc, 2H), 1.32 (t,  $J$  = 7.1 Hz, 3H), 1.31 (t,  $J$  = 7.0 Hz, 3H), 1.06-0.96 (m, 21H), 0.92 (d,  $J$  = 6.9 Hz, 3H).

**<sup>13</sup>C-NMR** (CDCl<sub>3</sub>, 100.6 MHz):  $\delta$  = 164.8 (d,  $J$  = 6.7 Hz), 146.4, 138.6, 137.2, 134.7, 126.0, 125.8, 114.6, 87.0, 79.0, 77.1, 73.8, 62.5 (d,  $J$  = 6.3 Hz), 56.7, 39.0, 35.6, 34.5 (d,  $J$  = 134 Hz), 33.2, 32.3, 28.6, 19.8, 18.1, 18.0, 16.32 (d,  $J$  = 6.2 Hz), 16.28 (d,  $J$  = 6.2 Hz), 12.4, 11.2, 9.7.

**HRMS** Calcd. for C<sub>35</sub>H<sub>64</sub>INaO<sub>7</sub>PSi [M+Na]<sup>+</sup>  $m/z$  805.3096. Found: 805.3097.

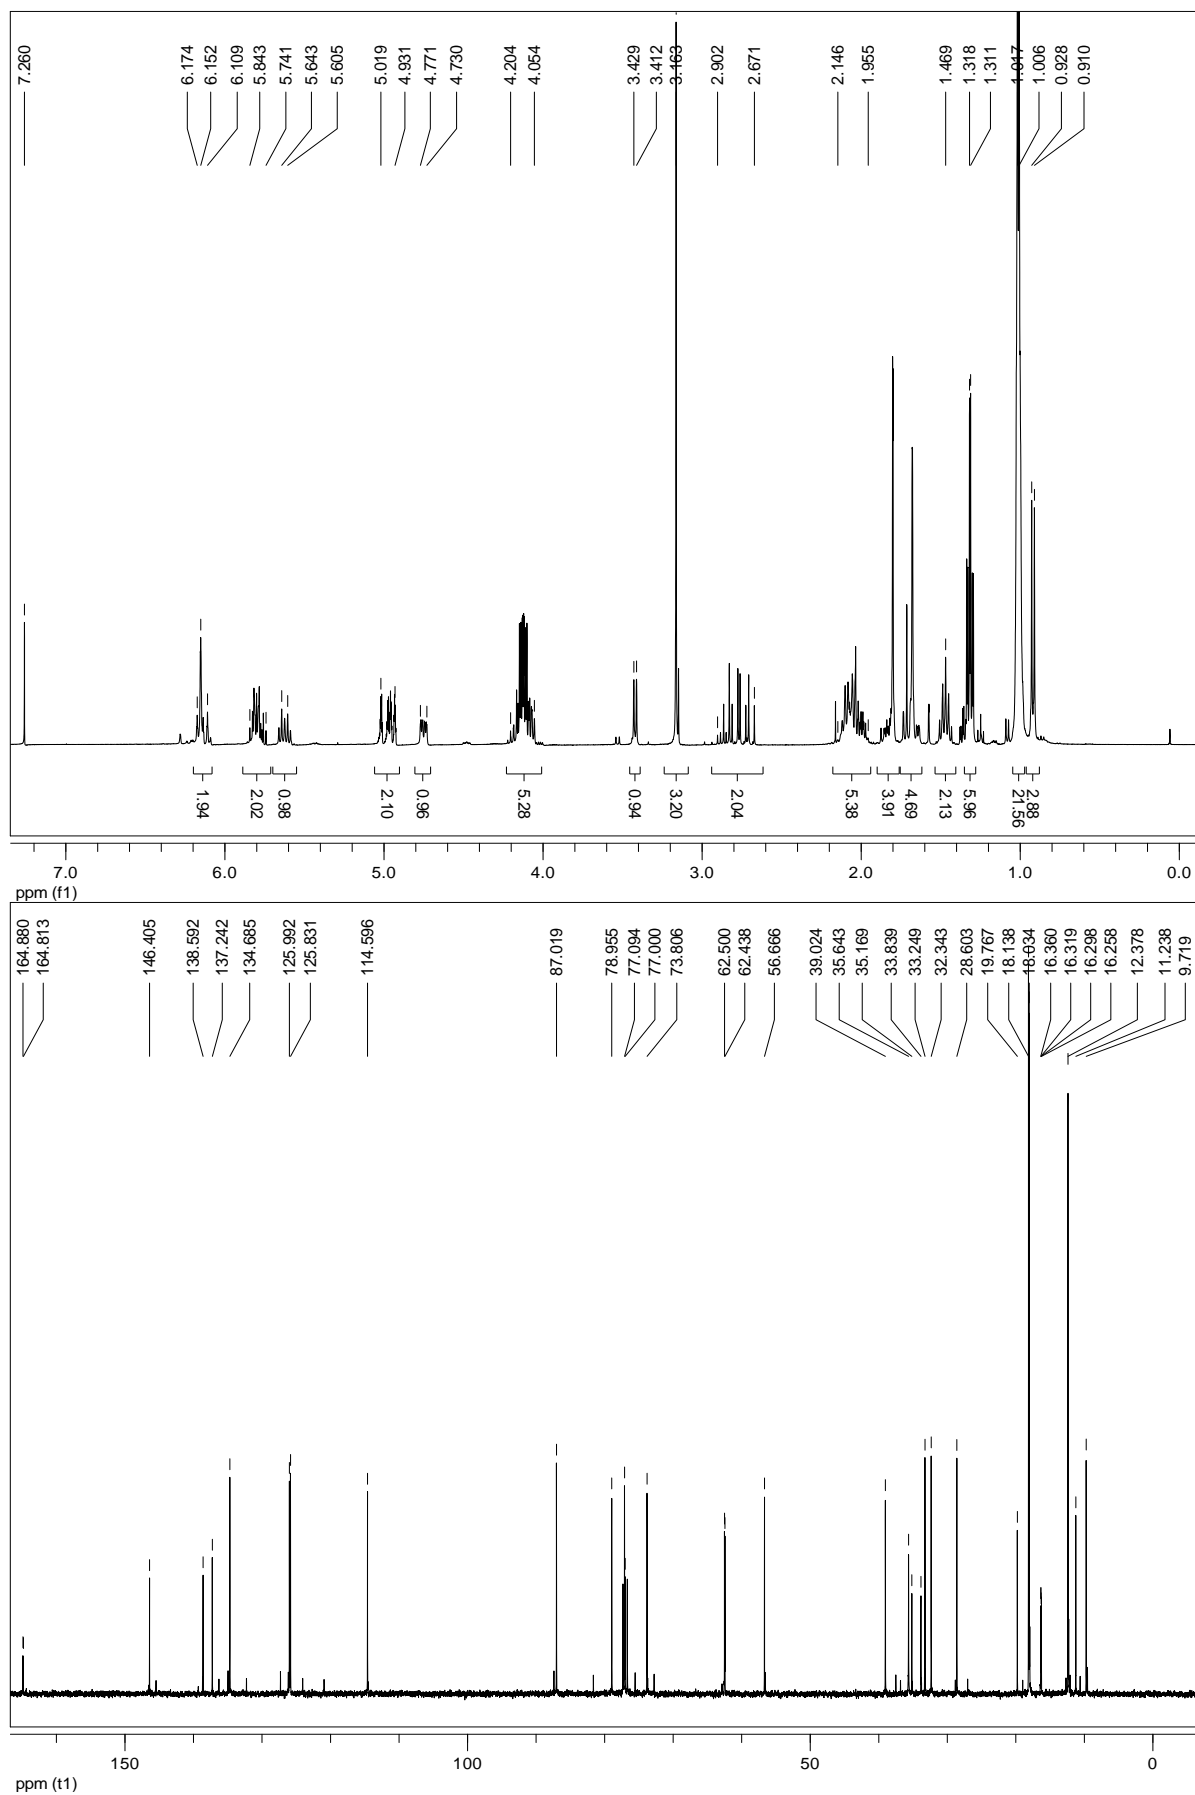

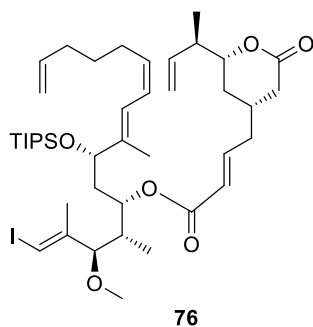

**(1*E*,3*R*,4*S*,5*S*,7*S*,8*E*,10*Z*)-1-Iodo-3-methoxy-2,4,8-trimethyl-7-((triisopropylsilyl)-oxy)hexadeca-1,8,10,15-tetraen-5-yl (*E*)-4-(((2*R*,4*R*)-2-((*R*)-but-3-en-2-yl)-6-oxotetrahydro-2*H*-pyran-4-yl)but-2-enoate (**76**):** To LiCl (3.88 mg, 91.5  $\mu$ mol, 1.20 eq) was added a solution of the phosphonate **S18** (71.8 mg, 91.7  $\mu$ mol, 1.20 eq) in MeCN (0.6 mL), followed by DBU (13.0  $\mu$ L, 84.1  $\mu$ mol, 1.10 eq). After 20 min stirring at rt, the mixture was cooled to 0  $^{\circ}$ C, whereupon the solution turned turbid. Then a solution of the aldehyde **67** (15.0 mg, 76.4  $\mu$ mol, 1.00 eq) in MeCN (0.3 mL, rinsed with 2 $\times$ 0.2 mL) was added dropwise. TLC reaction control after 45 min indicated, that no aldehyde was left. After 1 h stirring the mixture was concentrated under reduced pressure and the residue was purified by flash chromatography (hex:EtOAc 5:1 $\rightarrow$ 2:1) to afford the desired product **76** (48.6 mg, 85%) as a colourless oil.

**TLC** (hex:EtOAc 5:1):  $R_f$  = 0.45

**$^1\text{H-NMR}$**  ( $\text{CDCl}_3$ , 400.1 MHz):  $\delta$  = 6.80-6.69 (m, 1H), 6.16 (bs, 1H), 6.10 ( $m_c$ , 1H), 5.88-5.69 (m, 4H), 5.59 ( $m_c$ , 1H), 5.17-5.07 (m, 2H), 5.00 (ddd,  $J$  = 1.6 Hz,  $J$  = 3.6 Hz,  $J$  = 17.2 Hz, 1H), 4.95 (tdd,  $J$  = 1.2 Hz,  $J$  = 2.2 Hz,  $J$  = 10.2 Hz, 1H), 4.78 (ddd,  $J$  = 1.7 Hz,  $J$  = 4.0 Hz,  $J$  = 10.0 Hz, 1H), 4.17-4.07 (m, 2H), 3.38 (d,  $J$  = 7.2 Hz, 1H), 3.16 (s, 3H), 2.69 ( $m_c$ , 1H), 2.45 ( $m_c$ , 1H), 2.29-1.89 (m, 10H), 1.87-1.75 (m, 1H), 1.83 (d,  $J$  = 1.0 Hz, 3H), 1.74-1.62 (m, 1H), 1.67 (bs, 3H), 1.47 ( $m_c$ , 2H), 1.30-1.14 (m, 1H), 1.12 (d,  $J$  = 6.8 Hz, 3H), 1.06-0.95 (m, 21H), 0.90 (d,  $J$  = 6.9 Hz, 3H).

**$^{13}\text{C-NMR}$**  ( $\text{CDCl}_3$ , 100.6 MHz):  $\delta$  = 170.5, 165.2, 146.5, 144.0, 138.7, 138.4, 137.2, 134.1, 126.2, 125.9, 124.3, 116.5, 114.6, 87.6, 83.2, 79.0, 76.5, 72.6, 56.7, 42.7, 38.9, 38.7, 36.0, 35.8, 33.2, 32.4, 31.9, 31.0, 28.6, 19.7, 18.2, 18.1, 15.3, 12.5, 11.5, 9.8.

**HRMS** Calcd. for  $\text{C}_{42}\text{H}_{73}\text{INO}_6\text{Si}$  [ $\text{M}+\text{NH}_4$ ] $^+$   $m/z$  842.4246. Found: 842.4250.

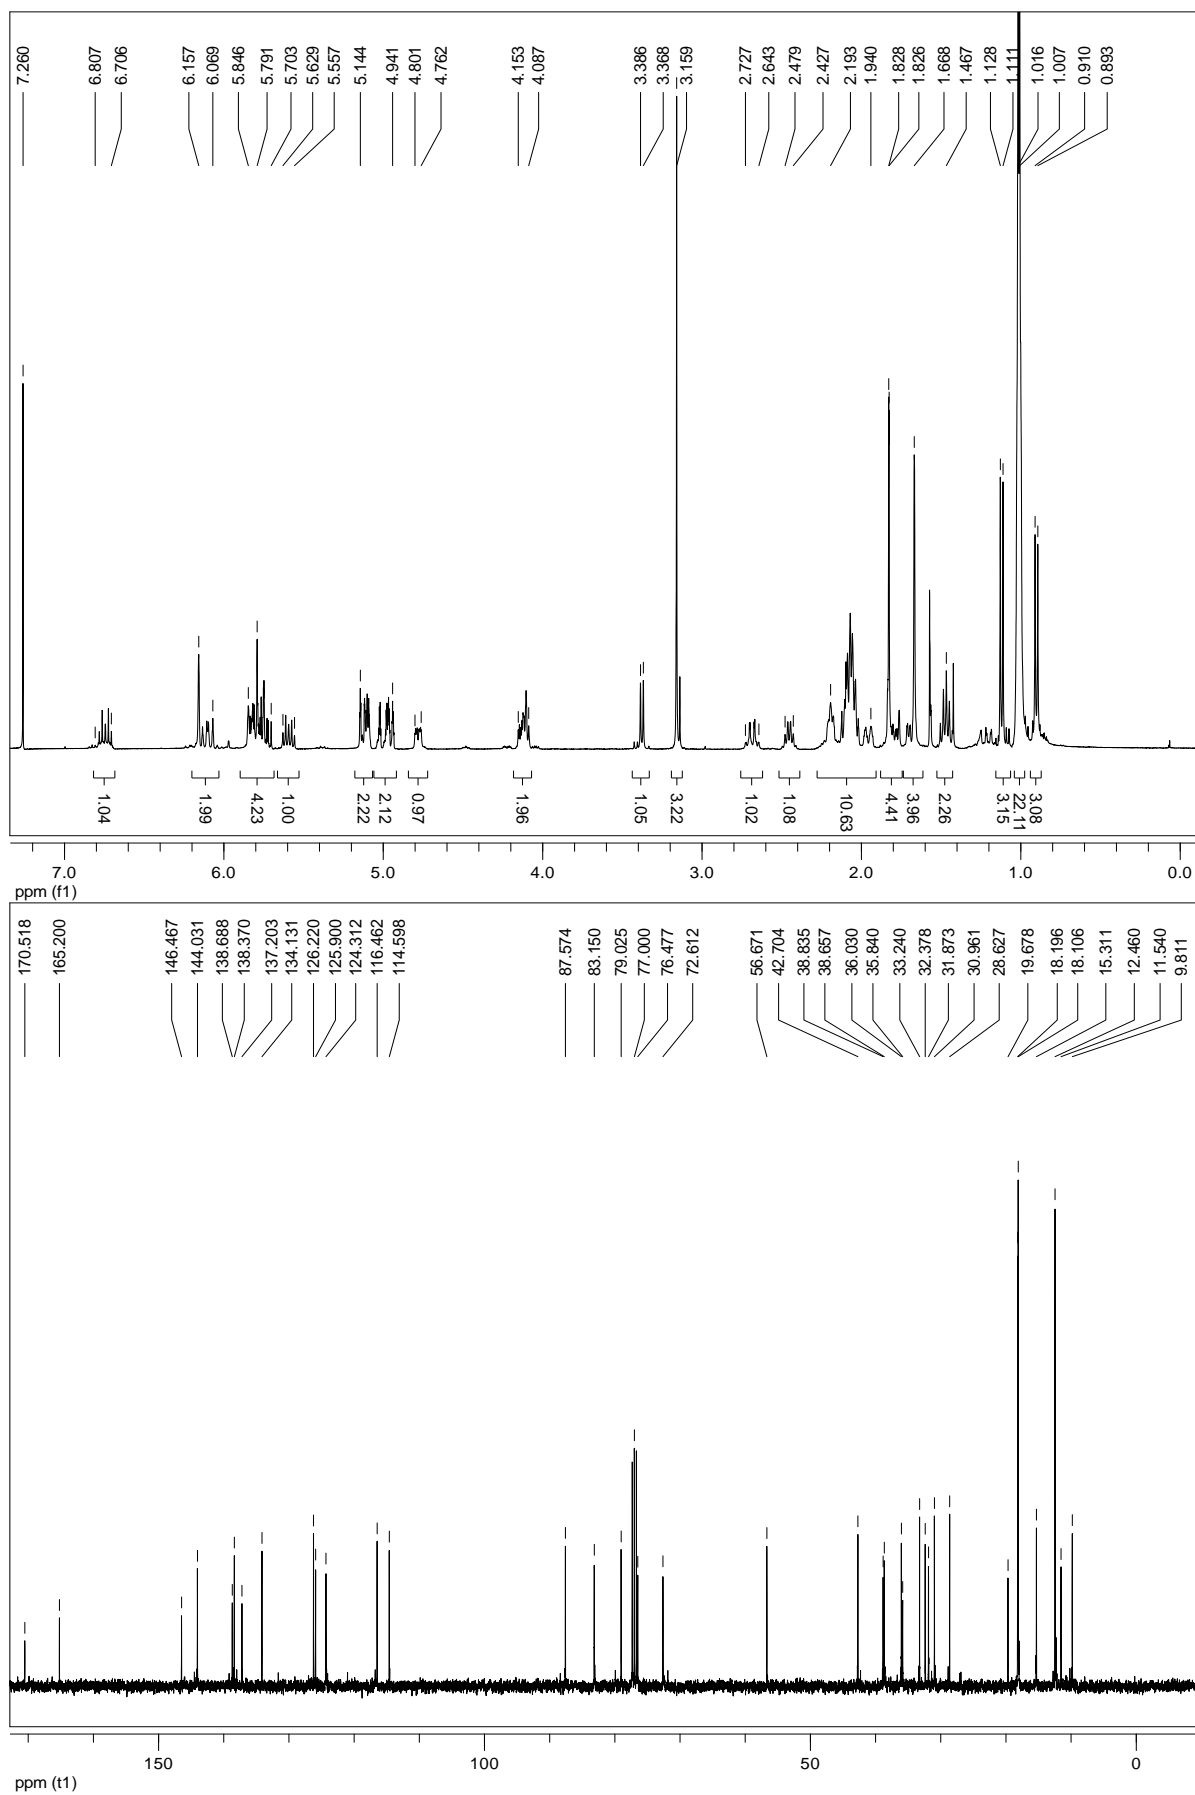

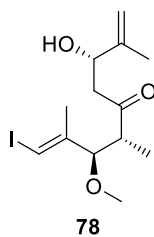

**(3*R*,4*R*,7*S*,*E*)-7-Hydroxy-1-iodo-3-methoxy-2,4,8-trimethylnona-1,8-dien-5-one**

**(78):** A solution of (+)-DIP-Cl (342 mg, 1.07 mmol, 2.00 eq) in CH<sub>2</sub>Cl<sub>2</sub> (0.4 mL) was cooled to −78 °C. Upon cooling, the solution froze which rendered the mixture instirrable. Next NEt<sub>3</sub> (0.177 mL, 1.28 mmol, 2.40 eq), followed by a solution of ketone **27** (150 mg, 0.532 mmol, 1.00 eq) in CH<sub>2</sub>Cl<sub>2</sub> (0.2 mL, rinsed with 2×0.2 mL) were added. After 1 h 40 min the cooling was removed and, after a few minutes, replaced by an ice bath. This led to formation of a thick suspension, which was slightly stirrable. After 5 min at 0 °C, the mixture was re-cooled to −78 °C. It was more homogeneous than before warming, but still hardly stirrable. After a total of 2 h 45 min, neat methacrolein (**77**) (88 μL, 1.06 mmol, 2.00 eq) was added. No change was observed, except that stirring was slightly facilitated. The mixture was stirred for another 50 min at −78 °C, and was then aged in a freezer (−18 °C) for ca. 3.5 d. Afterwards the reaction was quenched with pH 7 phosphate buffer and the layers were separated. The aqueous phase was diluted with phosphate buffer and extracted with CH<sub>2</sub>Cl<sub>2</sub> (3×10 mL). The combined extracts were concentrated under reduced pressure. The residue was dissolved in MeOH (3 mL) and pH 7 phosphate buffer (0.6 mL) was added. After cooling to 0 °C H<sub>2</sub>O<sub>2</sub> (30%, 0.75 mL) was added and the mixture was stirred at 0 °C for 45 min and at rt for 15 min. Afterwards it was poured into water (40 mL). CH<sub>2</sub>Cl<sub>2</sub> was added and the layers were separated. The aqueous phase was extracted with CH<sub>2</sub>Cl<sub>2</sub> (3×10 mL). The combined organic extracts were washed with brine, dried over Na<sub>2</sub>SO<sub>4</sub> and concentrated under reduced pressure. The crude was purified by column chromatography (hex:EtOAc 5:1) to afford the desired product **78** (312 mg, 40% wt/wt along with isopinocampheol/Et<sub>2</sub>O/EtOAc, 125 mg, 67%, dr=19.6:1) as a nearly colourless oil.

**TLC** (hex:EtOAc 5:1):  $R_f$  = 0.17

**$^1\text{H-NMR}$**  ( $\text{CDCl}_3$ , 400.1 MHz):  $\delta$  = 6.22 (m, 1H), 5.02 (m, 1H), 4.87 (m, 1H), 4.45 (td,  $J$  = 2.8 Hz,  $J$  = 8.6 Hz, 1H), 3.84 (dd,  $J$  = 7.4 Hz,  $J$  = 0.4 Hz, 1H), 3.21 (s, 3H), 2.93 (d,  $J$  = 3.3 Hz, 1H), 2.77 (p,  $J$  = 7 Hz, 1H), 2.71-2.54 (m, 2H), 1.76 (d,  $J$  = 1.1 Hz, 3H), 1.74 (m, 3H), 1.13 (d,  $J$  = 7.4 Hz, 3H)

**$^{13}\text{C-NMR}$**  ( $\text{CDCl}_3$ , 100.6 MHz):  $\delta$  = 212.7, 145.5, 145.2, 111.2, 86.3, 80.6, 70.8, 57.0, 50.0, 47.6, 19.8, 18.4, 12.1.

**HRMS** Calcd. for  $\text{C}_{13}\text{H}_{21}\text{INaO}_3$   $[\text{M}+\text{Na}]^+$   $m/z$  375.0428. Found: 375.0435.

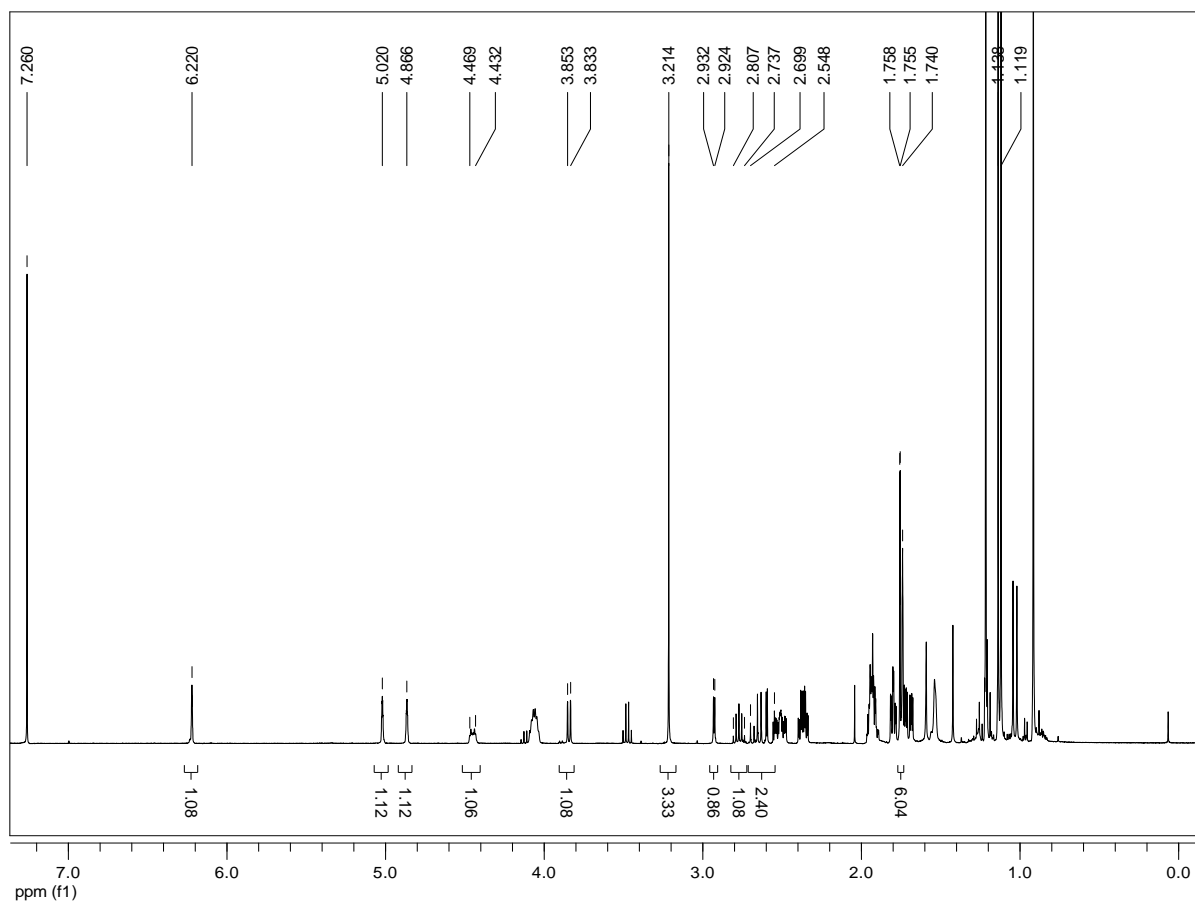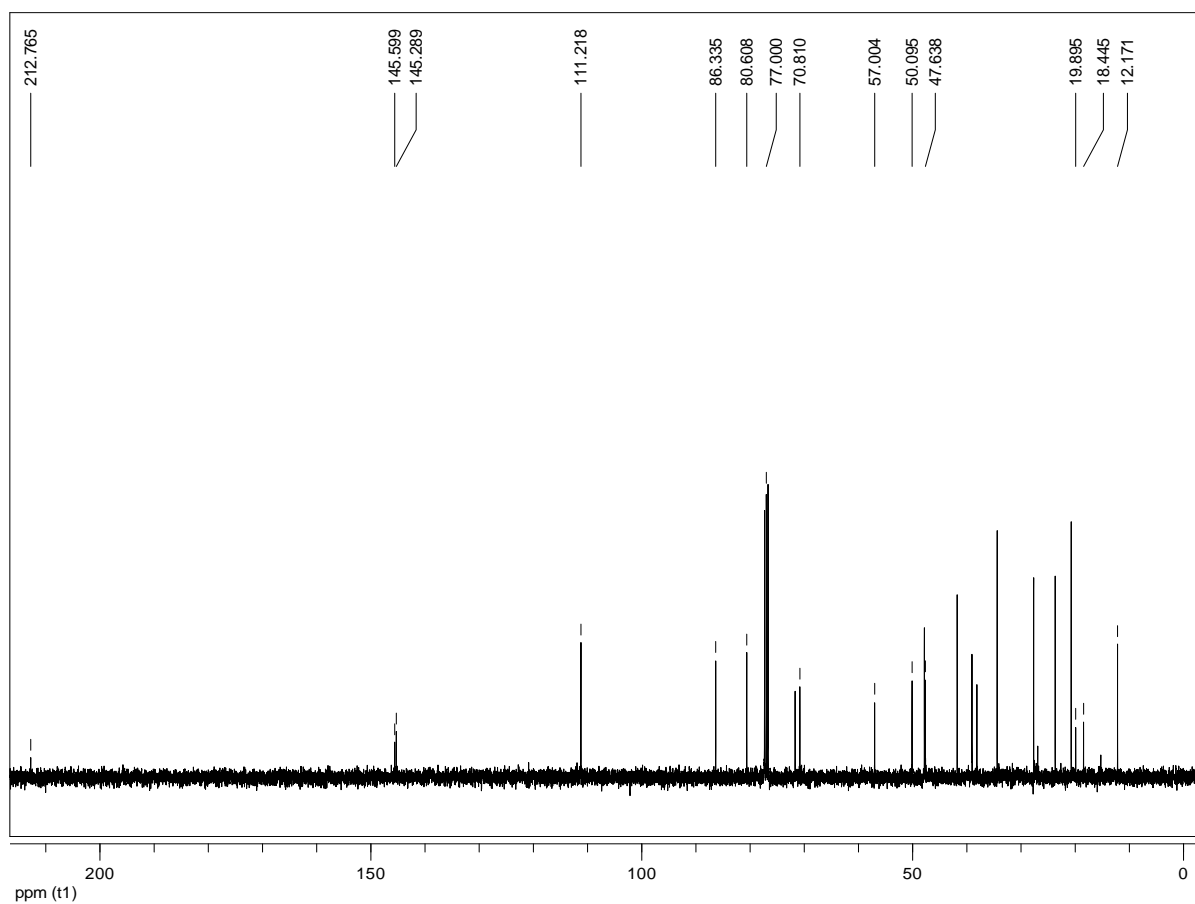



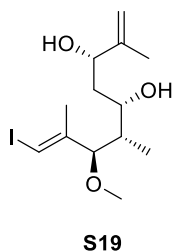

**(3*S*,5*S*,6*S*,7*R*,*E*)-9-iodo-7-methoxy-2,6,8-trimethylnona-1,8-diene-3,5-diol (S19):** A solution of tetramethylammonium triacetoxymethylborohydride (417 mg, 4.65 eq) in MeCN (1.4 mL) and AcOH (1.4 mL) was cooled to  $-40\text{ }^{\circ}\text{C}$  (MeCN/dry ice). To the frozen mixture was added a solution of the ketone **78** (120 mg, 341  $\mu\text{mol}$ , 1.00 eq) in MeCN (0.4 mL, rinsed with  $2 \times 0.4\text{ mL}$ ). The resulting thick slurry was stirred for a few minutes at the same temperature and was then aged in a freezer ( $-18\text{ }^{\circ}\text{C}$ ) for 18 h. Afterwards the suspension was allowed to warm to rt and stirred for another 1 h 15 min. Then *Rochelle* salt (aq. sat.) was added. A white suspension formed immediately. This mixture was stirred at rt for 2 h. Then it was diluted with water, some  $\text{CH}_2\text{Cl}_2$  was added and the acetic acid was quenched with  $\text{NaHCO}_3$  (s). As soon as the gas evolution stopped, the layers were separated. The aqueous phase was extracted with  $\text{CH}_2\text{Cl}_2$  ( $3 \times 10\text{ mL}$ ). The combined organic extracts were washed with brine, dried over  $\text{MgSO}_4$  and concentrated under reduced pressure. The crude was purified by column chromatography (hex:Et<sub>2</sub>O 2:1  $\rightarrow$  hex:EtOAc 1:1) to afford the desired product **S20** (121 mg, 95% wt/wt along with EtOAc, 115 mg, 95%, dr=49:1) as a colourless oil.

**TLC** (Hex:EtOAc 1:1):  $R_f = 0.64$

**$[\alpha]_D^{24}$**  = +44.2 ( $c = 1.00$ ,  $\text{CHCl}_3$ )

**$^1\text{H-NMR}$**  ( $\text{CDCl}_3$ , 400.1 MHz):  $\delta = 6.15$  (m, 1H), 5.07 (bs, 1H), 4.91 (m, 1H), 4.37 (m, 1H), 3.95 (d,  $J = 3.6\text{ Hz}$ , 1H), 3.88-3.78 (m, 1H), 3.27 (s, 3H), 3.25 (d,  $J = 5.5\text{ Hz}$ , 1H), 2.74-2.68 (m, 1H), 1.83-1.68 (m, 3H), 1.76 (d,  $J = 1.0\text{ Hz}$ , 3H), 1.73 (bs, 3H), 0.85 (d,  $J = 7.1\text{ Hz}$ , 3H).

**$^{13}\text{C-NMR}$**  ( $\text{CDCl}_3$ , 100.6 MHz):  $\delta = 147.3, 145.3, 110.4, 86.5, 78.2, 73.1, 71.2, 57.3, 40.7, 38.2, 21.7, 18.8, 10.9$ .

**IR** ( $\nu/[\text{cm}^{-1}]$ ) 3385br, 3073, 2974, 2935, 2918, 2830, 1738, 1725, 1651, 1620, 1443, 1376, 1243, 1193, 1113, 1087s, 1049s, 1010, 948, 931, 921, 899, 852, 785, 683, 669, 647, 637, 597, 579, 569, 550, 542, 535, 515, 505, 499, 492, 483, 469, 459, 440, 424.

**HRMS** Calcd. for  $\text{C}_{13}\text{H}_{23}\text{I}\text{NaO}_3$   $[\text{M}+\text{Na}]^+$   $m/z$  377.0584. Found: 377.0571.

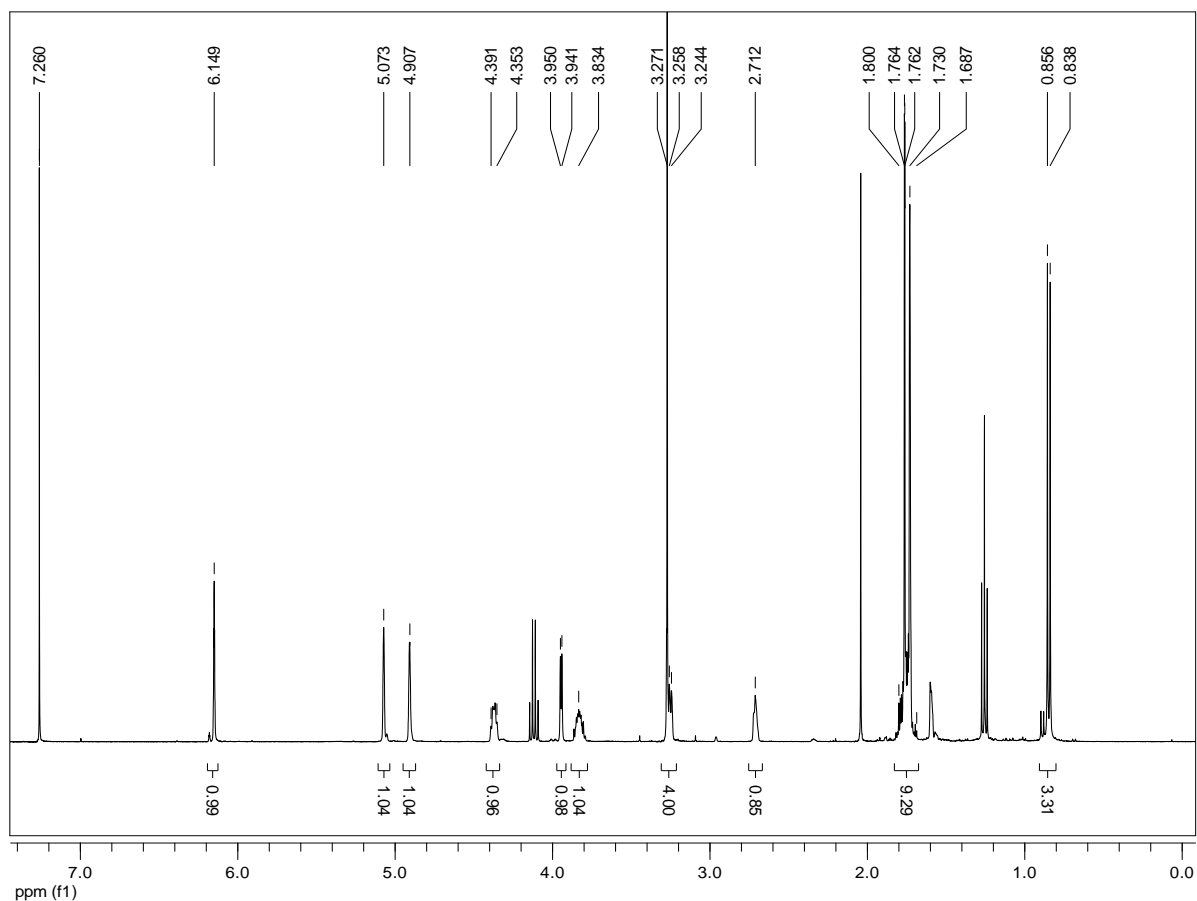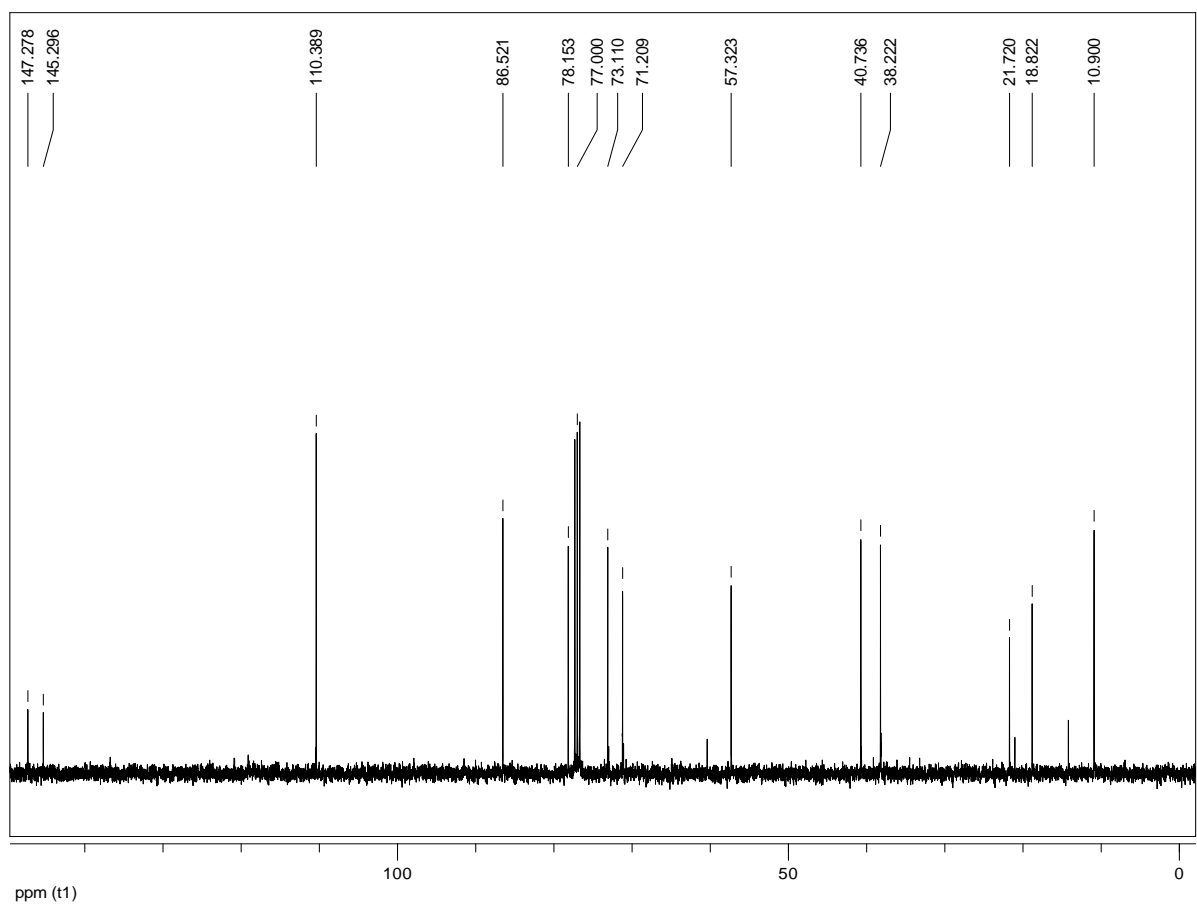

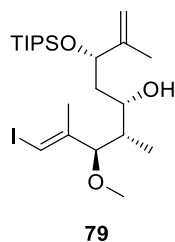

**(3R,4S,5S,7S,E)-1-Iodo-3-methoxy-2,4,8-trimethyl-7-((triisopropylsilyl)oxy)nona-1,8-dien-5-ol (79):** To a solution of the diol **S19** (104 mg, 0.294 mmol, 1.00 eq) in CH<sub>2</sub>Cl<sub>2</sub> (8 mL) over molecular sieves (3 Å beads) was added 2,6-lutidine (171 μL, 1.47 mmol, 5.00 eq) at rt. The mixture was stirred at rt for 5 min, then it was cooled to –78 °C and, after another 5 min stirring, TIPSOTf (87.0 μL, 0.323 mmol, 1.10 eq) was added. TLC reaction control after 25 min indicated nearly full conversion. After 35 min the reaction was quenched with NaHCO<sub>3</sub> (sat. aq.). The layers were separated and the aqueous phase was extracted with CH<sub>2</sub>Cl<sub>2</sub> (3×10 mL). Then the combined organic extracts were washed with brine, dried over MgSO<sub>4</sub> and the solvent was removed under reduced pressure. The crude was purified by column chromatography (hex:Et<sub>2</sub>O 7:1) to afford the desired product **79** as a colourless oil (146 mg, 97%).

**TLC** (hex:EtOAc 5:1):  $R_f$  = 0.52;  $[\alpha]_D^{24}$  = +16.43 ( $c$  = 0.85, CHCl<sub>3</sub>); **<sup>1</sup>H-NMR** (CDCl<sub>3</sub>, 400.1 MHz):  $\delta$  = 6.08 (m, 1H), 5.14 (m, 1H), 4.98 (m, 1H), 4.49 (t,  $J$  = 4.1 Hz, 1H), 3.80-3.68 (m, 3H), 3.22 (s, 3H), 1.79-1.64 (m, 3H), 1.74 (d,  $J$  = 1.0 Hz, 3H), 1.69 (bs, 3H), 1.13-1.02 (m, 21H), 0.84 (d,  $J$  = 7.0 Hz, 3H); **<sup>13</sup>C{<sup>1</sup>H}-NMR** (CDCl<sub>3</sub>, 100.6 MHz):  $\delta$  = 146.4, 145.5, 111.6, 86.4, 77.9, 75.6, 69.5, 57.2, 41.2, 37.1, 20.9, 19.3, 18.04, 18.02, 12.2, 9.9; **IR** ( $\nu$ /[cm<sup>-1</sup>]) 3518br, 2942, 2893, 2867, 1654, 1620, 1462, 1379, 1256, 1193, 1112, 1082s, 1064s, 998, 952, 919, 883s, 818, 784, 764, 725, 719, 679s, 658, 596, 569, 561, 510, 499, 485, 463, 446, 433, 424, 410, 404; **HRMS** Calcd. for C<sub>22</sub>H<sub>44</sub>IO<sub>3</sub>Si [M+H]<sup>+</sup>  $m/z$  511.2099. Found: 511.2103.

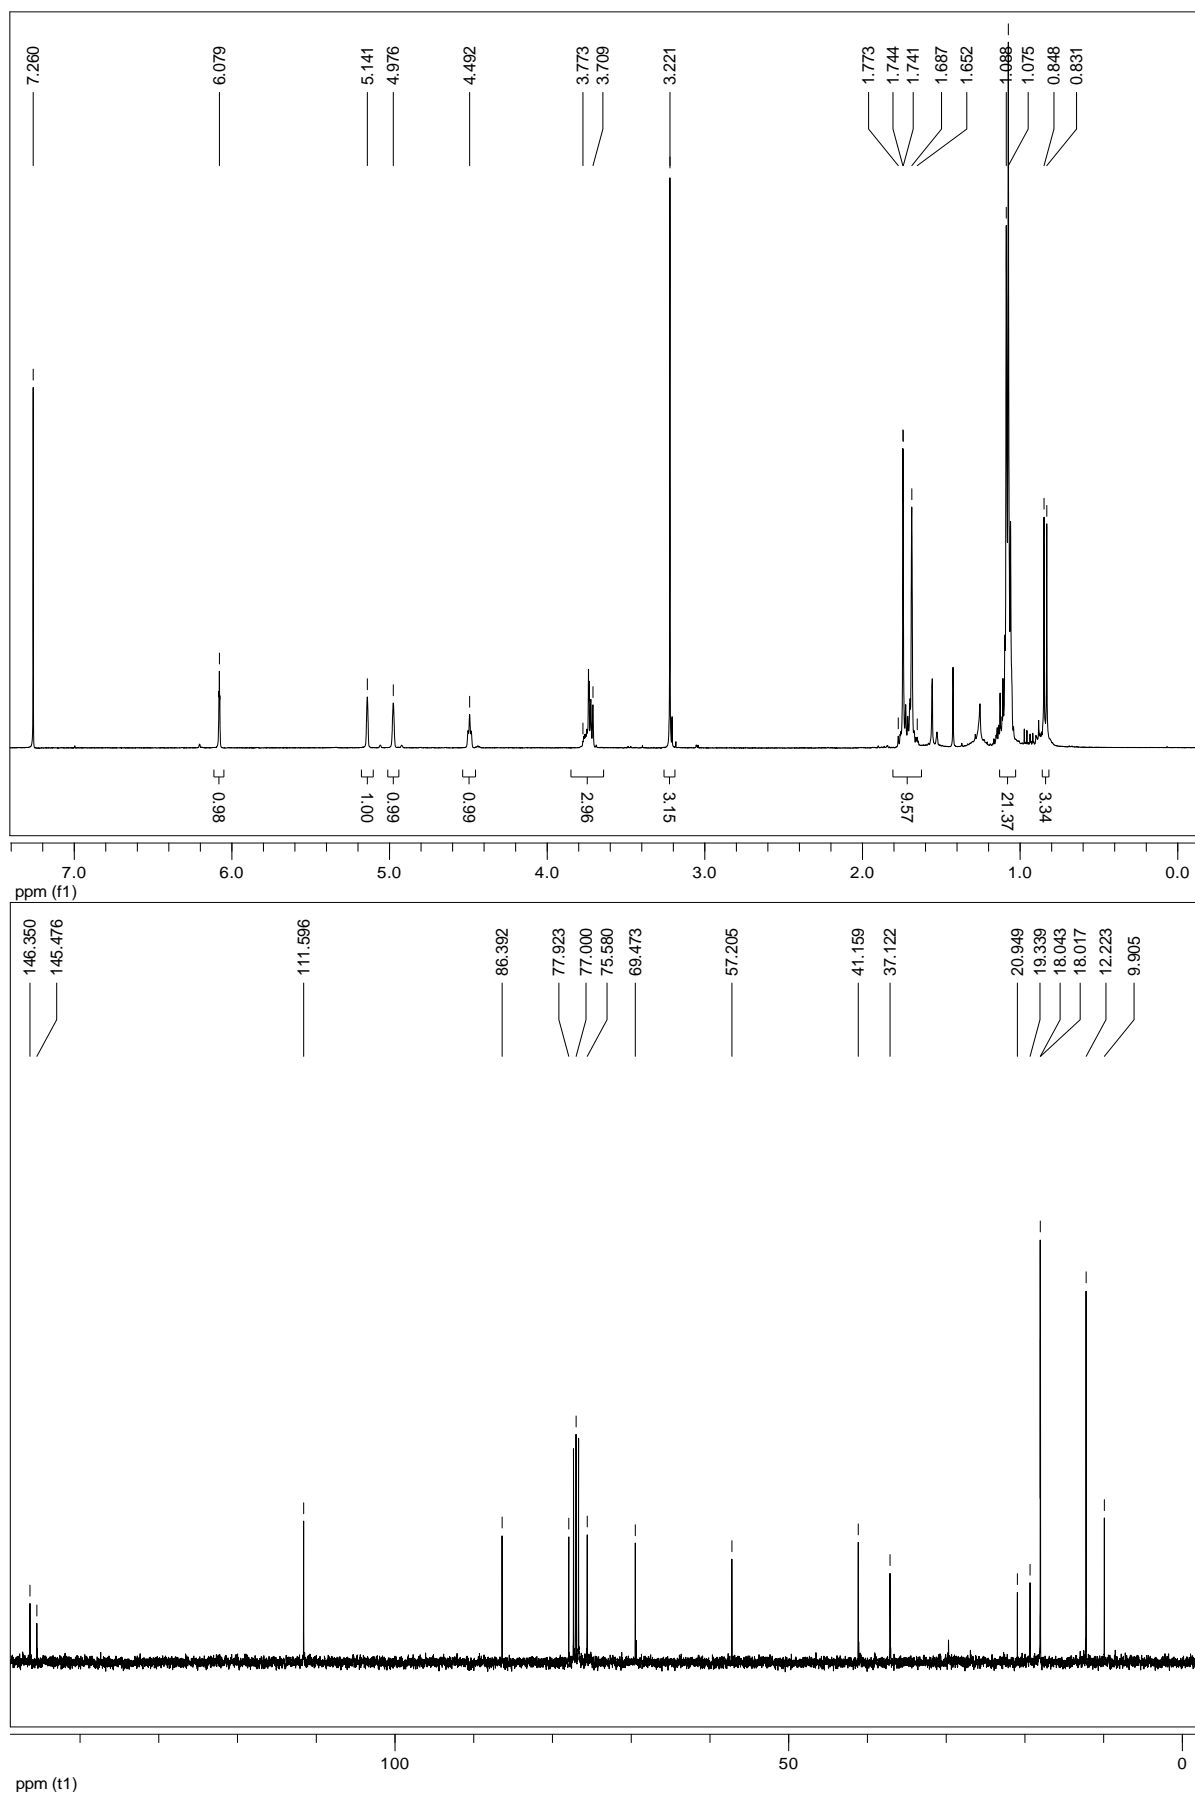

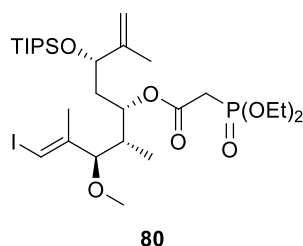

**(3R,4S,5S,7S,E)-1-iodo-3-methoxy-2,4,8-trimethyl-7-((triisopropylsilyl)oxy)nona-1,8-dien-5-yl 2-(diethoxyphosphoryl)acetate (80):** To a cooled (0 °C) solution of diethylphosphonoacetic acid (**55**) (66  $\mu$ L, 0.413 mmol, 1.50 eq) in CH<sub>2</sub>Cl<sub>2</sub> (3.5 mL) over molecular sieves (beads, 3 Å) was added CME-carbodiimide (210 mg, 0.496 mmol, 1.80 eq). The mixture was stirred at 0 °C for 10-15 min, then a solution of the alcohol **79** (141 mg, 0.275 mmol, 1.00 eq) in CH<sub>2</sub>Cl<sub>2</sub> (1.1 mL, rinsed with 2×1.1 mL) was added. The cooling was removed and DMAP (3.4 mg, 10 mol%) was added. After 2.5 h the mixture was concentrated under reduced pressure. The crude was purified by column chromatography (hex:EtOAc 2:1→1:1) to afford the desired ester **80** (154 mg, 81%) as a colourless oil.

**TLC** (Hex:EtOAc 1:1):  $R_f$  = 0.43

**$[\alpha]_D^{24}$**  = +18.5 ( $c$  = 0.905, CHCl<sub>3</sub>)

**<sup>1</sup>H-NMR** (CDCl<sub>3</sub>, 400.1 MHz):  $\delta$  = 6.16 (m<sub>c</sub>, 1H), 4.80 (m<sub>c</sub>, 1H), 4.75 (ddd,  $J$  = 1.7 Hz,  $J$  = 4.4 Hz,  $J$  = 10.0 Hz, 1H), 4.71 (m<sub>c</sub>, 1H), 4.20-4.10 (m, 5H), 3.43 (d,  $J$  = 6.6 Hz, 1H), 3.17 (s, 3H), 2.85 (ddd,  $J$  = 14.4 Hz,  $J$  = 21.5 Hz,  $J$  = 34.1 Hz, 2H), 2.02 (m<sub>c</sub>, 1H), 1.89-1.78 (m, 1H), 1.81 (d,  $J$  = 1.1 Hz, 3H), 1.74-1.64 (m, 1H), 1.70 (d,  $J$  = 0.4 Hz, 3H), 1.33 (m<sub>c</sub>, 6H), 1.07-1.00 (m, 21H), 0.94 (d,  $J$  = 6.9 Hz, 3H).

**<sup>13</sup>C-NMR** (CDCl<sub>3</sub>, 100.6 MHz):  $\delta$  = 164.9 (d,  $J$  = 6.2 Hz), 147.2, 146.5, 111.7, 87.1, 79.0, 75.6, 73.8, 62.53 (d,  $J$  = 6.3 Hz), 62.51 (d,  $J$  = 6.3 Hz), 56.7, 39.0, 35.9, 34.3 (d,  $J$  = 135 Hz), 19.8, 18.16, 18.90, 16.4, 16.34 (d,  $J$  = 6.4 Hz), 16.32 (d,  $J$  = 6.3 Hz), 12.4, 9.7.

**IR** ( $\nu$ /[cm<sup>-1</sup>]) 3072, 2942, 2866, 1734, 1651, 1614, 1462, 1385, 1264s, 1199, 1162, 1089, 1051s, 1052s, 964, 883, 825, 784, 713, 678, 656, 621, 569, 505, 500, 487, 482, 462, 422, 417.

**HRMS** Calcd. for C<sub>28</sub>H<sub>54</sub>INaO<sub>7</sub>PSi [M+Na]<sup>+</sup>  $m/z$  711.2313. Found: 711.2

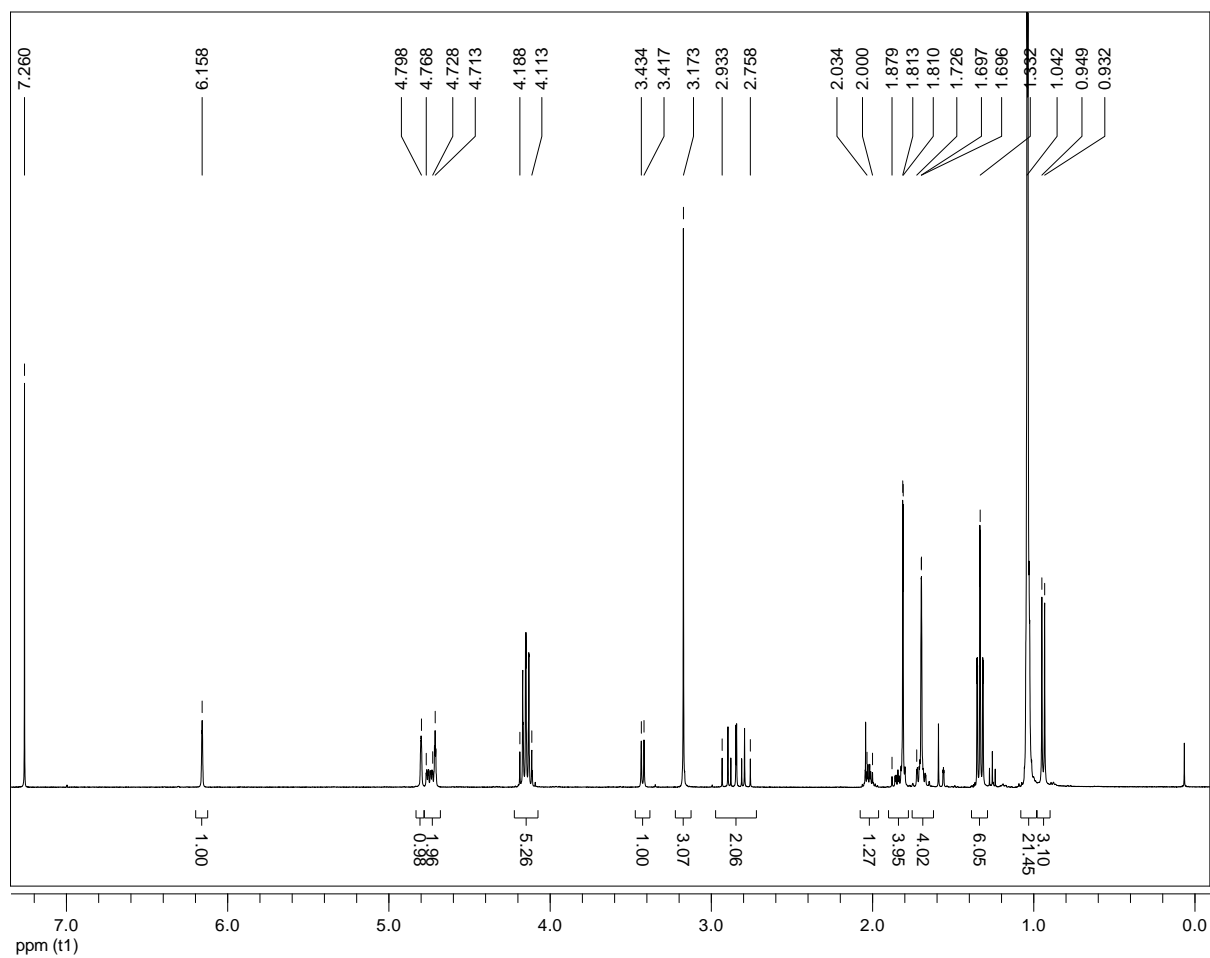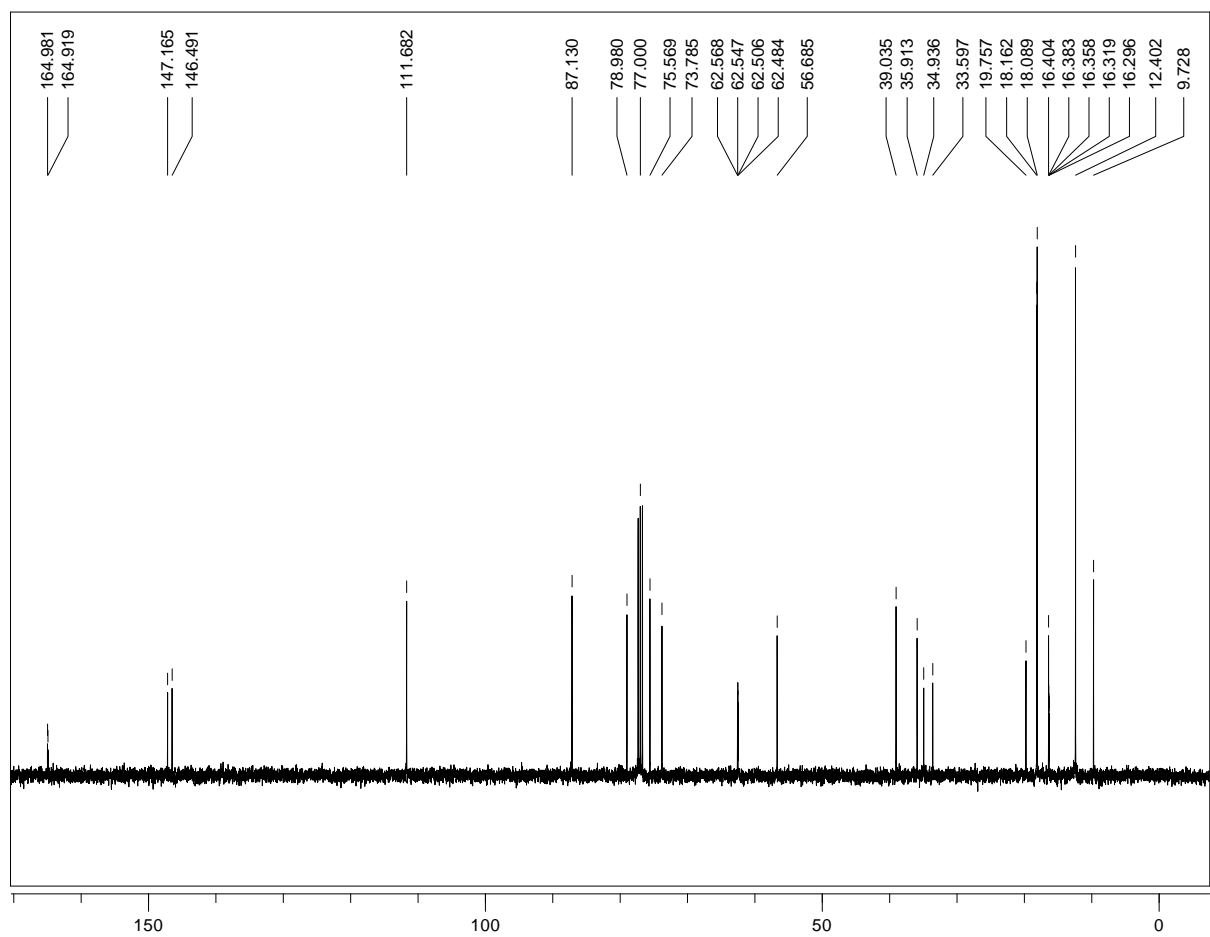

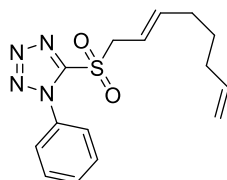

81

**(E)-5-(Octa-2,7-dien-1-ylsulfonyl)-1-phenyl-1H-tetrazole (81):** To a solution of (*E*)-2,7-octadienol (**80**)<sup>19</sup> (300 mg, 2.38 mmol, 1.0 equiv), 2-mercaptophenyltetrazole (509 mg, 2.86 mmol, 1.2 equiv) and triphenylphosphine (749 mg, 2.86 mmol, 1.2 equiv) in THF (12.8 mL) was added dropwise at rt DEAD (0.45 mL, 2.86 mmol, 1.2 equiv). After stirring for 3 h at rt, the reaction mixture was diluted with ethanol (21 mL) and cooled to 0 °C. Then, a premixed solution of 50% H<sub>2</sub>O<sub>2</sub> (2.23 mL, 36.4 mmol, 15 equiv) and ammonium molybdate (486 mg, 0.39 mmol, 17 mol%) in water (1.5 mL) was added dropwise to the reaction mixture. After stirring over night at rt, the yellow reaction mixture was diluted with water (50 mL). The layers were separated and the aqueous layer was extracted with CH<sub>2</sub>Cl<sub>2</sub> (3 x 30 mL). The combined organic extracts were washed with water and brine, dried over MgSO<sub>4</sub>, filtered and concentrated under reduced pressure. The crude purified by column chromatography (hexane/EtOAc, 15:1 → 10:1) to afford **81** (436 mg, 57% over 2 steps) as a colorless oil, which solidified upon storage in the freezer to give a colorless solid.

**R<sub>f</sub>** = 0.41 (hexane/EtOAc, 5:1)

**<sup>1</sup>H-NMR** (400.1 MHz, CDCl<sub>3</sub>): δ = 7.70-7.55 (m, 5H), 5.96 (td, *J* = 6.9, 15.1 Hz, 1H), 5.74 (td, *J* = 6.7, 10.2, 17.0 Hz, 1H), 5.50 (dtt, *J* = 15.4, 7.4, 1.5 Hz, 1H), 5.02-4.92 (m, 2H), 4.37 (dd, *J* = 0.8, 7.4 Hz, 2H), 2.10 (m<sub>c</sub>, 2H), 1.99 (dd, *J* = 7.0, 14.6 Hz, 2H), 1.45 (m<sub>c</sub>, 2H).

**<sup>13</sup>C-NMR** (100.6 MHz, CDCl<sub>3</sub>): δ = 144.8, 138.0, 133.0, 131.4, 129.6, 125.1, 115.0, 113.1, 59.8, 32.9, 32.0, 27.6 (one quaternary carbon missing)

**HRMS (ESI):** *m/z* calcd for C<sub>15</sub>H<sub>19</sub>N<sub>4</sub>O<sub>2</sub>S [M + H]<sup>+</sup>: 319.1223, found: 319.1228.

<sup>19</sup> Isomerically pure (*E*)-2,7-octadienol was prepared from commercially available (*E/Z*)-2,7-octadienol via PCC oxidation and DIBAL reduction according to a literature procedure: Singh, O. V.; Han, H. *Org. Lett.* **2004**, 6, 3067-3070.

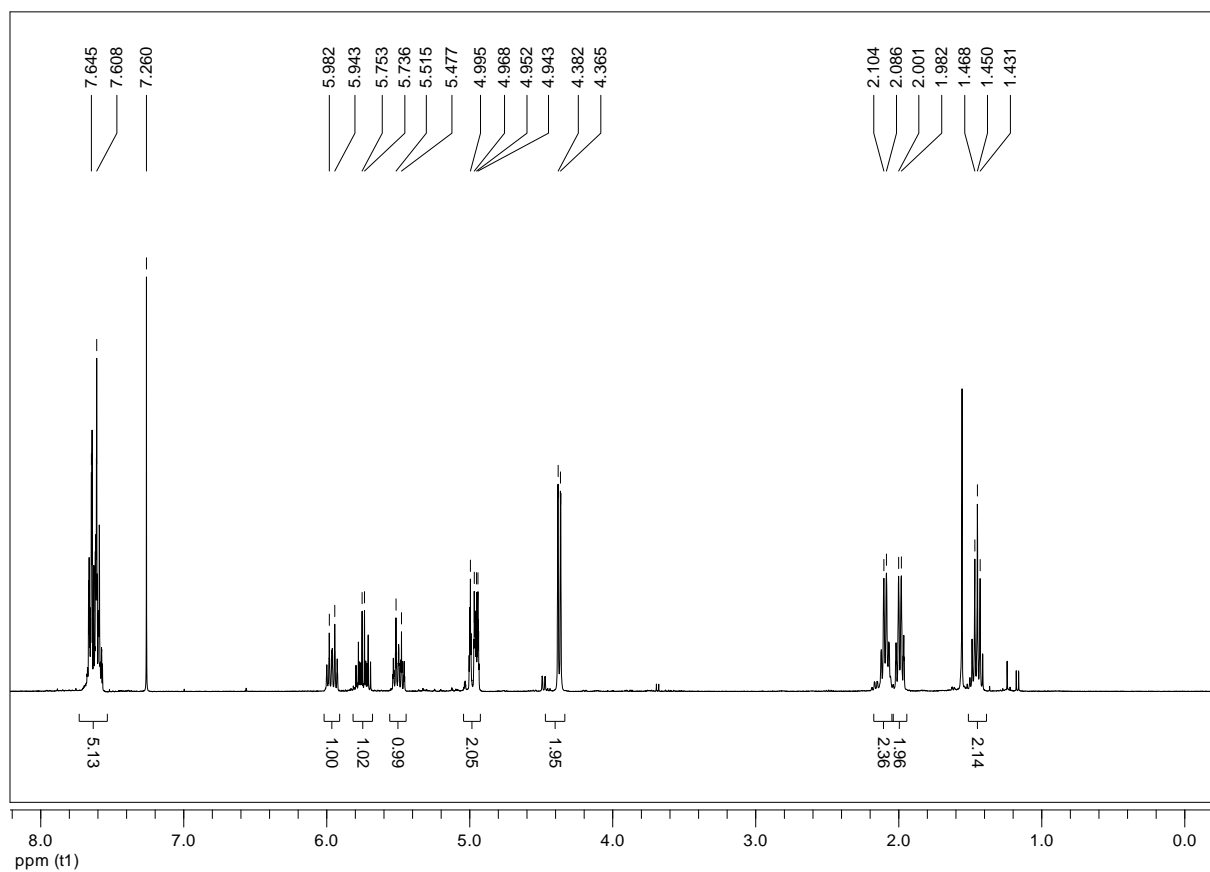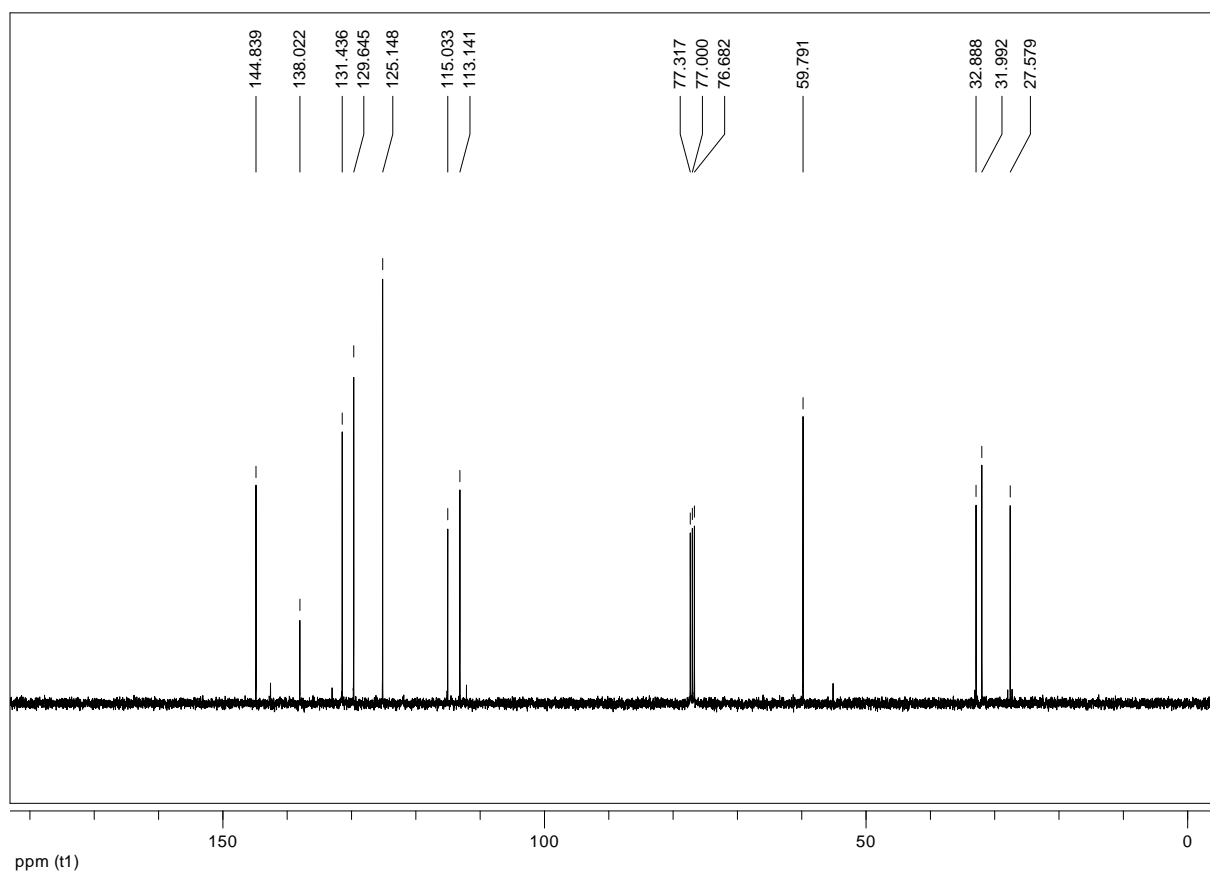



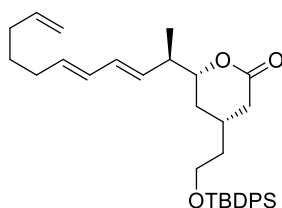**S20**

**(4*R*,6*R*)-4-(2-((*tert*-Butyldiphenylsilyl)oxy)ethyl)-6-((*R*,3*E*,5*E*)-undeca-3,5,10-trien-2-yl)tetrahydro-2H-pyran-2-one (S20):** To a solution of crude aldehyde **68** (380 mg) and sulfone **81** (332 mg, 1.04 mmol, 1.3 equiv) in THF (7.6 mL) was added at –78 °C LiHMDS (2.10 mL, 1.05 mmol, 1.3 equiv, 0.5 M solution in THF). After stirring the yellowish solution at –78 °C for 1.5 h, the reaction mixture was allowed to warm to rt over 2 h. pH7 buffer solution (20 mL) was added and the mixture was diluted with Et<sub>2</sub>O (20 mL). The layers were separated and the aqueous layer was extracted with Et<sub>2</sub>O (2 x 25 mL). The combined organic extracts were washed with brine, dried over MgSO<sub>4</sub>, filtered and concentrated under reduced pressure. The crude product was purified by column chromatography (pentane/Et<sub>2</sub>O, 15:1 → 10:1 → 7:1 → 6:1 → 5:1) to afford **S20** (144 mg, 34% over 2 steps, E/Z >30:1) as a colorless oil.

**R<sub>f</sub>** = 0.18 (pentane/Et<sub>2</sub>O, 5:1)

**[α]<sub>D</sub><sup>24</sup>** = +7.5° [*c* = 0.610, CHCl<sub>3</sub>]

**<sup>1</sup>H-NMR** (400.1 MHz, CDCl<sub>3</sub>): δ = 7.68-7.58 (m, 4H), 7.48-7.33 (m, 6H), 6.05 (dd, *J* = 10.3, 17.2 Hz, 1H), 6.01 (dd, *J* = 10.4, 17.0 Hz, 1H), 5.80 (ddd, *J* = 6.7, 10.2, 16.9 Hz, 1H), 5.63 (td, *J* = 6.8, 13.9 Hz, 1H), 5.46 (dd, *J* = 8.0, 14.5 Hz, 1H), 5.01 (ddd, *J* = 1.6, 3.5, 17.2 Hz, 1H), 4.96 (ddd, *J* = 2.8, 6.2, 11.8 Hz, 1H), 4.08 (ddd, *J* = 2.8, 6.2, 11.8 Hz, 1H), 3.69 (t, *J* = 6.0 Hz, 2H), 2.64 (ddd, *J* = 1.7, 5.4, 17.2 Hz, 1H), 2.43 (m<sub>c</sub>, 1H), 2.24-1.95 (m, 6H), 1.89 (d, *J* = 13.7 Hz, 1H), 1.61-1.41 (m, 4H), 1.20-1.08 (m, 1H), 1.10 (d, *J* = 6.9 Hz, 3H), 1.04 (s, 9H).

**<sup>13</sup>C-NMR** (100.6 MHz, CDCl<sub>3</sub>): δ = 171.4, 138.6, 135.5, 133.8, 133.6, 133.5, 131.7, 131.5, 130.2, 129.8, 127.7, 114.6, 83.9, 60.8, 41.8, 38.7, 36.4, 33.2, 32.3, 32.0, 28.5, 26.9, 19.2, 15.8.

**IR** (neat, ν/cm<sup>-1</sup>): 3071w, 2928m, 2857m, 1736s, 1472w, 1428m, 1389w, 1235m, 1110s, 990m, 910w, 823m, 739m, 703s, 615m, 505s, 488m.

**HRMS (ESI):** *m/z* calcd for C<sub>34</sub>H<sub>46</sub>NaO<sub>3</sub>Si [M + Na]<sup>+</sup>: 553.318, found: 553.3109.

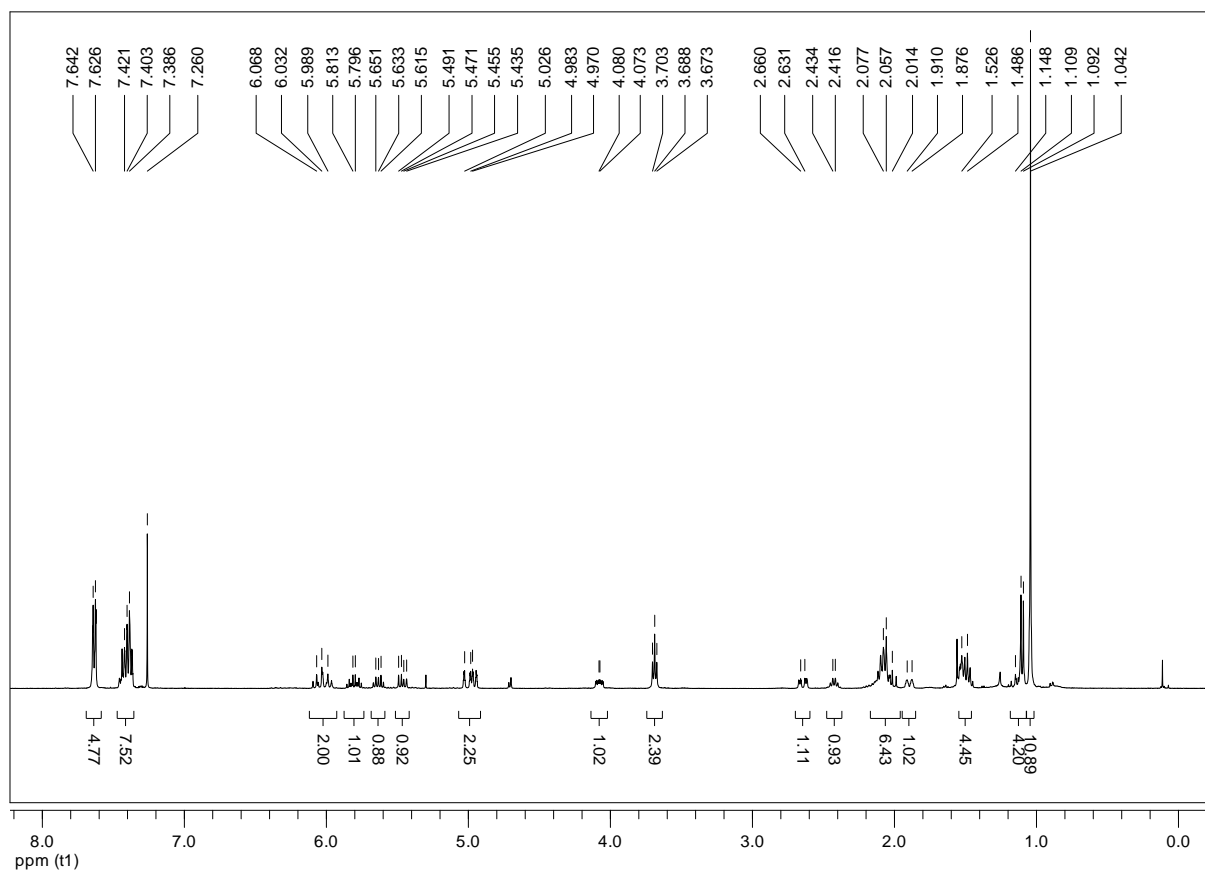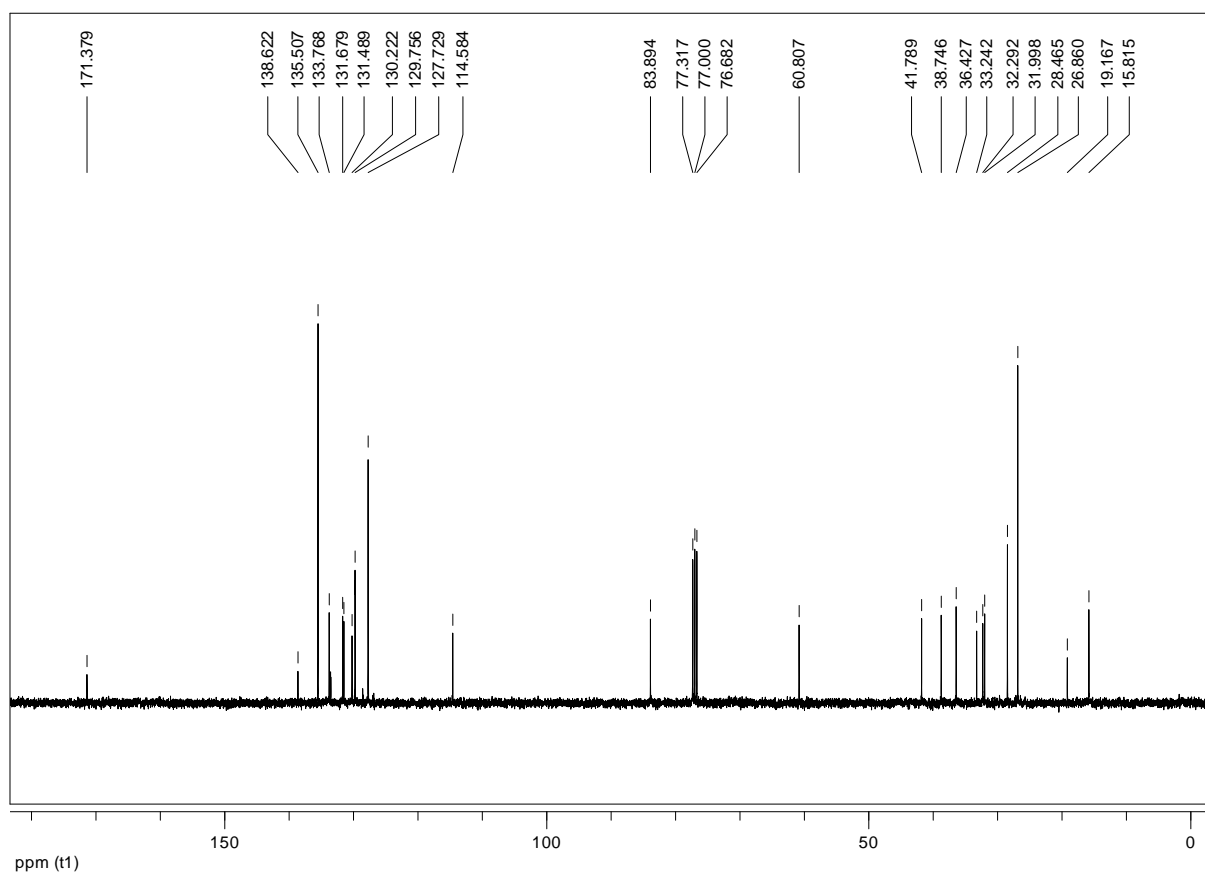

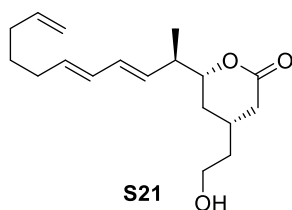

**(4*R*,6*R*)-4-(2-Hydroxyethyl)-6-((*R*,3*E*,5*E*)-undeca-3,5,10-trien-2-yl)tetrahydro-2H-pyran-2-one (S21):** To a solution of **S20** (144 mg, 0.27 mmol, 1.0 equiv) in THF (2.70 mL) was added at 0 °C TBAF (1.10 mL, 1.10 mmol, 4.0 equiv, 1.0 M in THF) and AcOH (63  $\mu$ L, 1.1 mmol, 4.0 equiv). After stirring for 16 h at rt, the reaction mixture was quenched with sat. NH<sub>4</sub>Cl (15 mL). The layers were separated and the aqueous layer was extracted with EtOAc (3 x 20 mL). The combined organic extracts were washed with brine, dried over MgSO<sub>4</sub> and the solvent was removed under reduced pressure. The residue was purified by column chromatography (hexane/EtOAc, 1:2  $\rightarrow$  0:1) to give **S21** (72.4 mg, 89%, E/Z >30:1, 3% wt/wt CH<sub>2</sub>Cl<sub>2</sub>) as a colorless oil.

**R<sub>f</sub>** = 0.52 (EtOAc).

**[ $\alpha$ ]<sub>D</sub><sup>24</sup>** = +10.7° [*c* = 0.635, CHCl<sub>3</sub>].

**<sup>1</sup>H-NMR** (400.1 MHz, CDCl<sub>3</sub>):  $\delta$  = 6.13-5.91 (m, 2H), 5.80 (tdd, *J* = 6.7, 10.2, 16.9 Hz, 1H), 5.63 (td, *J* = 6.8, 13.9 Hz, 1H), 5.47 (dd, *J* = 8.0, 14.6 Hz, 1H), 5.00 (ddd, *J* = 1.6, 3.6, 17.2 Hz, 1H), 4.95 (tdd, *J* = 1.2, 2.2, 10.2 Hz, 1H), 4.12 (ddd, *J* = 2.9, 6.3, 11.8 Hz, 1H), 3.70 (t, *J* = 6.3 Hz, 2H), 2.78-2.65 (m, 1H), 2.45 (m<sub>c</sub>, 1H), 2.20-2.01 (m, 6H), 1.96 (m<sub>c</sub>, 1H), 1.66-1.42 (m, 5H), 1.28-1.10 (m, 1H), 1.11 (d, *J* = 6.8 Hz, 3H).

**<sup>13</sup>C-NMR** (100.6 MHz, CDCl<sub>3</sub>):  $\delta$  = 171.3, 138.6, 133.9, 131.8, 131.4, 130.2, 114.6, 83.8, 59.6, 41.8, 38.8, 36.3, 33.2, 32.3, 32.0, 28.4, 28.2, 15.8.

**IR** (neat,  $\nu$ /cm<sup>-1</sup>): 3427brs, 2925m, 1723s, 1456w, 1440w, 1381m, 1247s, 1087m, 1053m, 990s, 911m.

**HRMS (ESI):** *m/z* calcd for C<sub>18</sub>H<sub>28</sub>NaO<sub>3</sub> [*M* + Na]<sup>+</sup>: 315.1931, found: 315.1923.

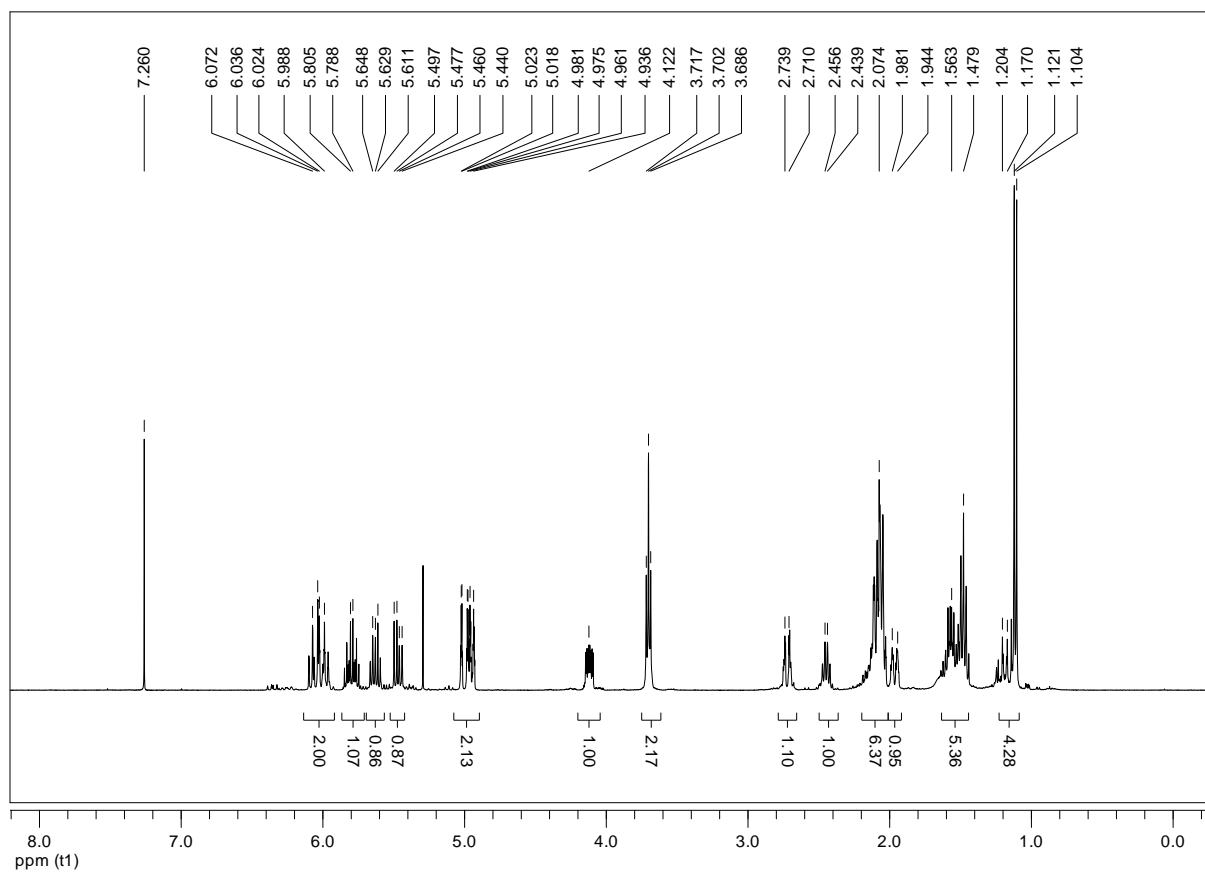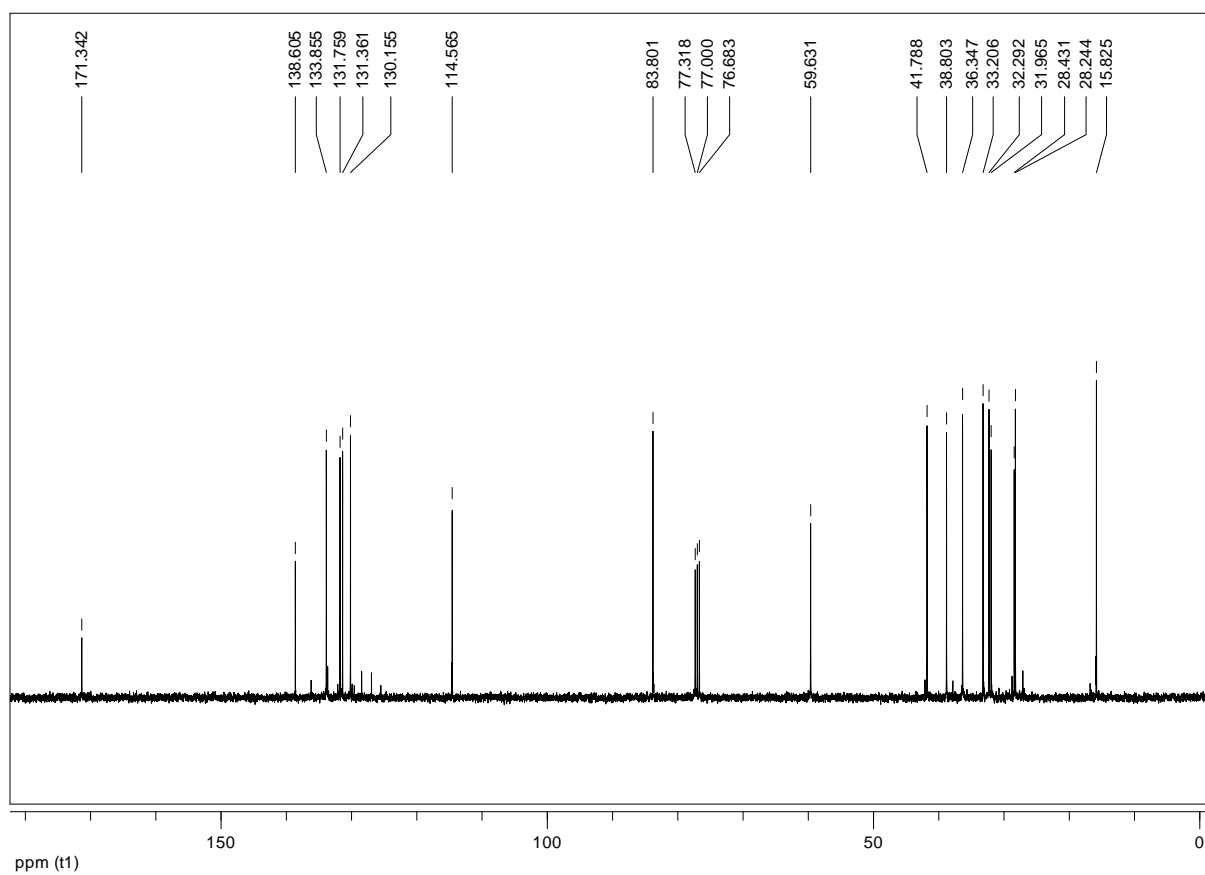

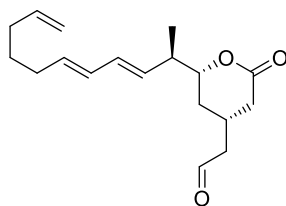

83

**2-((4*S*,6*R*)-2-oxo-6-((*R*,3*E*,5*E*)-undeca-3,5,10-trien-2-yl)tetrahydro-2*H*-pyran-4-yl)acetaldehyde (**83**):** To a solution of oxalyl chloride (30.6  $\mu$ L, 0.36 mmol, 1.5 equiv) in  $\text{CH}_2\text{Cl}_2$  (3.0 mL) at  $-78^\circ\text{C}$  was added dropwise DMSO (51.3  $\mu$ L, 0.72 mmol, 3.0 equiv). After stirring at  $-78^\circ\text{C}$  for 10 min, a solution of **S21** (70.4 mg, 0.24 mmol, 1.0 equiv) in  $\text{CH}_2\text{Cl}_2$  (2.1 mL) was added dropwise. The resultant cloudy mixture was stirred at  $-78^\circ\text{C}$  for 1.5 h, and then TEA (0.13 mL, 0.96 mmol, 4.0 equiv) was added slowly and the reaction mixture was allowed to warm to room temperature (1 h). The reaction was quenched with water (10 mL), and the layers were separated. The aqueous phase was extracted with  $\text{CH}_2\text{Cl}_2$  (3 x 15 mL) and the combined organic phases were washed with brine, dried over  $\text{MgSO}_4$ , filtered and concentrated *in vacuo*. The crude product was purified by column chromatography (hexane/EtOAc, 3:1  $\rightarrow$  1:1) to afford **83** (66.6 mg, 95%) as a yellow oil.

$R_f$  = 0.40 (hexane/EtOAc, 1:1).

$[\alpha]_{\text{D}}^{24} = +7.4^\circ$  [ $c$  = 0.600,  $\text{CHCl}_3$ ].

**$^1\text{H-NMR}$**  (400.1 MHz,  $\text{CDCl}_3$ ):  $\delta$  = 9.75 (s, 1H), 6.12-5.90 (m, 2H), 5.79 (dt,  $J$  = 6.6, 16.9 Hz, 1H), 5.62 (td,  $J$  = 6.9, 14.2 Hz, 1H), 5.44 (dd,  $J$  = 8.0, 14.5 Hz, 1H), 5.00 (d,  $J$  = 17.2 Hz, 1H), 4.94 (d,  $J$  = 9.8 Hz, 1H), 4.15 (ddd,  $J$  = 2.6, 6.3, 11.3 Hz, 1H), 2.78 ( $m_c$ , 1H), 2.58-2.38 (m, 4H), 2.20-1.93 (m, 6H), 1.47 ( $m_c$ , 2H), 1.29-1.14 (m, 1H), 1.11 (d,  $J$  = 6.9 Hz, 3H).

**$^{13}\text{C-NMR}$**  (100.6 MHz,  $\text{CDCl}_3$ ):  $\delta$  = 199.6, 170.3, 138.6, 134.0, 131.9, 131.0, 130.1, 114.6, 83.4, 49.8, 41.7, 35.8, 33.2, 31.9 (2C), 28.4, 25.9, 15.8.

**IR** (neat,  $\text{v}/\text{cm}^{-1}$ ): 2974m, 2926m, 2855w, 2728w, 1732s, 1640w, 1456m, 1383m, 1238s, 1173w, 1078m, 991s, 912m.

**HRMS (ESI)**:  $m/z$  calcd for  $\text{C}_{18}\text{H}_{26}\text{NaO}_3$  [ $\text{M} + \text{Na}$ ] $^+$ : 313.1774, found: 313.1783.

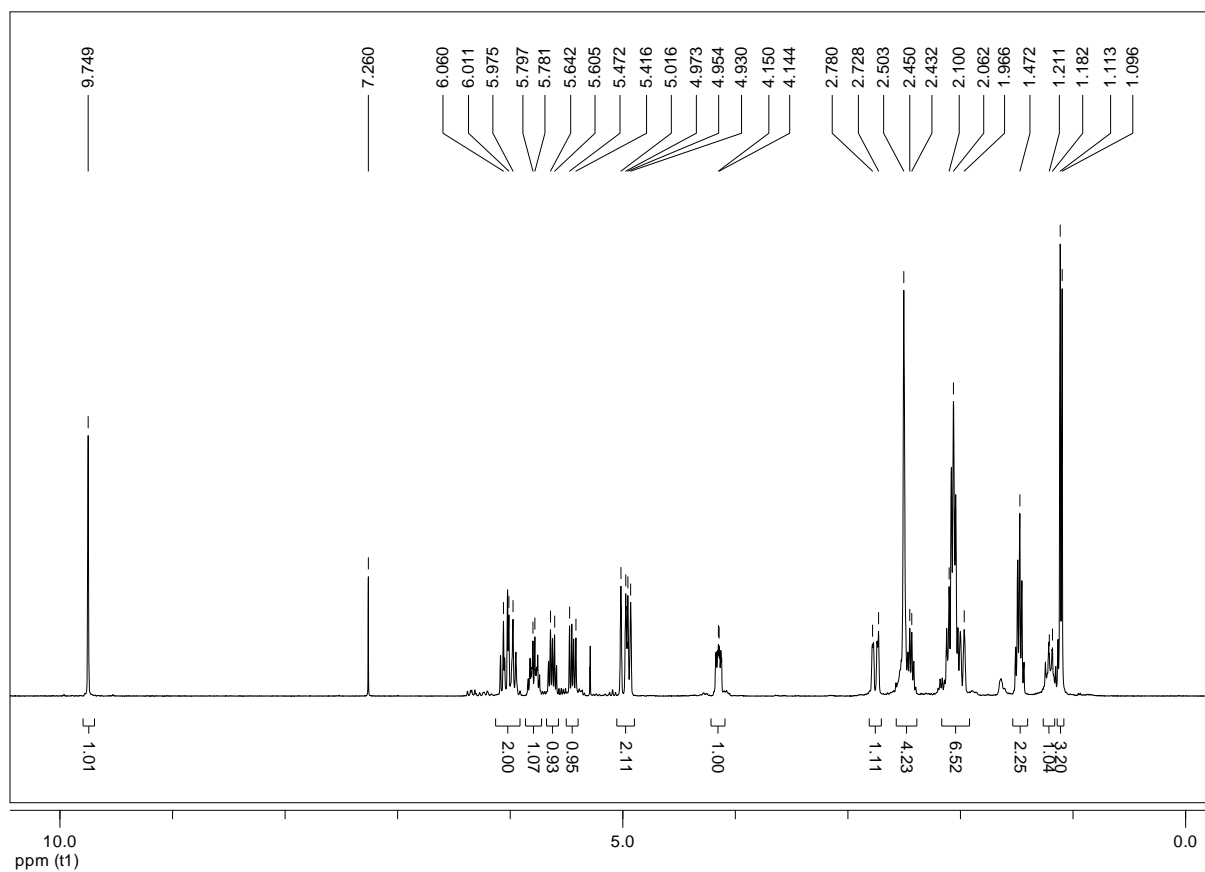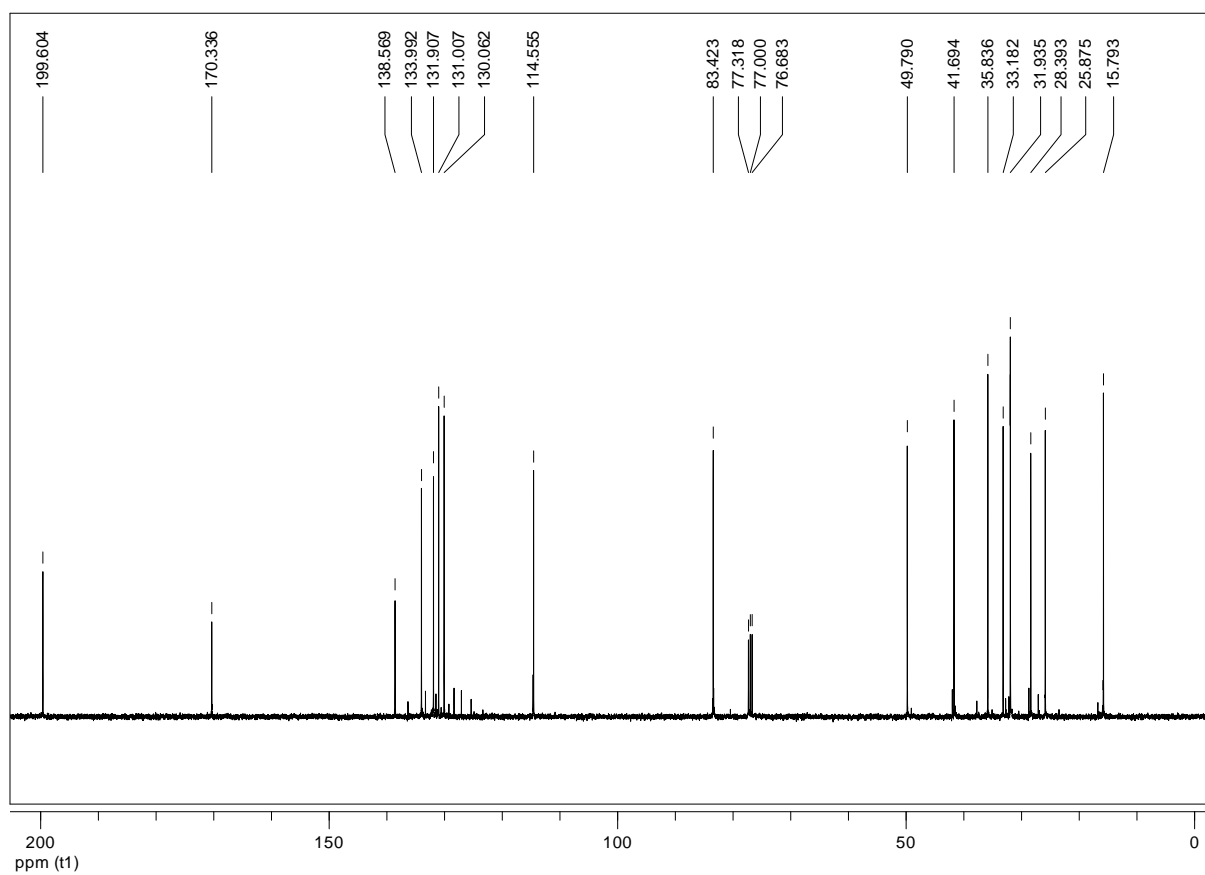

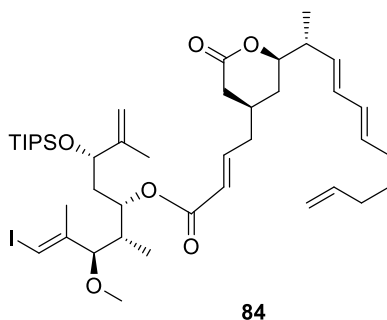

**(3*R*,4*S*,5*S*,7*S*,*E*)-1-iodo-3-methoxy-2,4,8-trimethyl-7-((triisopropylsilyl)oxy)nona-1,8-dien-5-yl (*E*)-4-((4*R*,6*R*)-2-oxo-6-((*R*,3*E*,5*E*)-undeca-3,5,10-trien-2-yl)tetrahydro-2*H*-pyran-4-yl)but-2-enoate (**83**):** To LiCl (8.9 mg, 211  $\mu$ mol, 1.15 eq) was added a solution of the phosphonate **80** (145 mg, 211  $\mu$ mol, 1.15 eq) in MeCN (0.3 mL, rinsed with 2 $\times$ 0.3 mL+0.5 mL), followed by DBU (30.0  $\mu$ L, 202  $\mu$ mol, 1.10 eq). After 15 min stirring at rt, the colourless solution was cooled to 0  $^{\circ}$ C, whereupon the solution turned slightly turbid. After 25 min, a solution of the aldehyde **83** (53.3 mg, 184  $\mu$ mol, 1.00 eq) in MeCN (1.6 mL) was added. The pale yellow mixture was stirred for 30 min at 0  $^{\circ}$ C and was then allowed to warm to rt. After 1 h, the mixture was concentrated at the rotavap and the residue was purified by flash chromatography (hex:EtOAc 3:1) to afford the desired product **84** (108 mg 97% wt/wt along with ether and EtOAc, 105 mg, 69%) as a colourless oil.

**TLC** (hex:EtOAc 3:1):  $R_f$  = 0.43

**$^1\text{H-NMR}$**  ( $\text{CDCl}_3$ , 400.1 MHz):  $\delta$  = 6.78 (mc, 1H), 6.15 (bs, 1H), 6.11-5.94 (m, 2H), 5.87-5.74 (m, 2H), 5.63 (td,  $J$  = 7.0 Hz,  $J$  = 14.1 Hz, 1H), 5.46 (dd,  $J$  = 8.0 Hz,  $J$  = 14.8 Hz, 1H), 5.00 (ddd,  $J$  = 1.6 Hz,  $J$  = 3.6 Hz,  $J$  = 17.1 Hz, 1H), 4.95 (tdd,  $J$  = 1.2 Hz,  $J$  = 2.2 Hz,  $J$  = 10.2 Hz, 1H), 4.78 (mc, 1H), 4.73 (ddd,  $J$  = 1.5 Hz,  $J$  = 4.0 Hz,  $J$  = 9.9 Hz, 1H), 4.65 (mc, 1H), 4.18-4.06 (m, 2H), 3.37 (d,  $J$  = 2.3 Hz, 1H), 3.16 (s, 3H), 2.68 (m, 1H), 2.46 (dd,  $J$  = 6.9 Hz,  $J$  = 13.8 Hz, 1H), 2.26-2.16 (m, 2H), 2.14-2.01 (m, 7H), 1.98-1.90 (m, 1H), 1.89-1.78 (m, 1H), 1.83 (d,  $J$  = 1.0 Hz, 3H), 1.76-1.63 (m, 1H), 1.67 (bs, 3H), 1.48 (mc, 2H), 1.24-1.16 (m, 1H), 1.11 (d,  $J$  = 6.8 Hz, 3H), 1.07-0.09 (m, 21H), 0.93 (d,  $J$  = 6.9 Hz, 3H).

**$^{13}\text{C-NMR}$**  ( $\text{CDCl}_3$ , 100.6 MHz):  $\delta$  = 170.6, 165.3, 147.0, 146.6, 144.2, 138.6, 134.1, 132.0, 131.0, 130.1, 124.1, 114.6, 111.7, 87.7, 83.5, 79.0, 75.5, 72.5, 56.7, 41.7, 39.0, 38.7, 35.9, 35.8, 33.2, 32.0, 31.9, 31.0, 28.4, 19.6, 18.2, 18.1, 16.5, 15.8, 12.4, 9.9.

**HRMS** Calcd. for  $\text{C}_{42}\text{H}_{69}\text{INaO}_6\text{Si}$   $[\text{M}+\text{Na}]^+$   $m/z$  847.3800. Found: 847.3808.

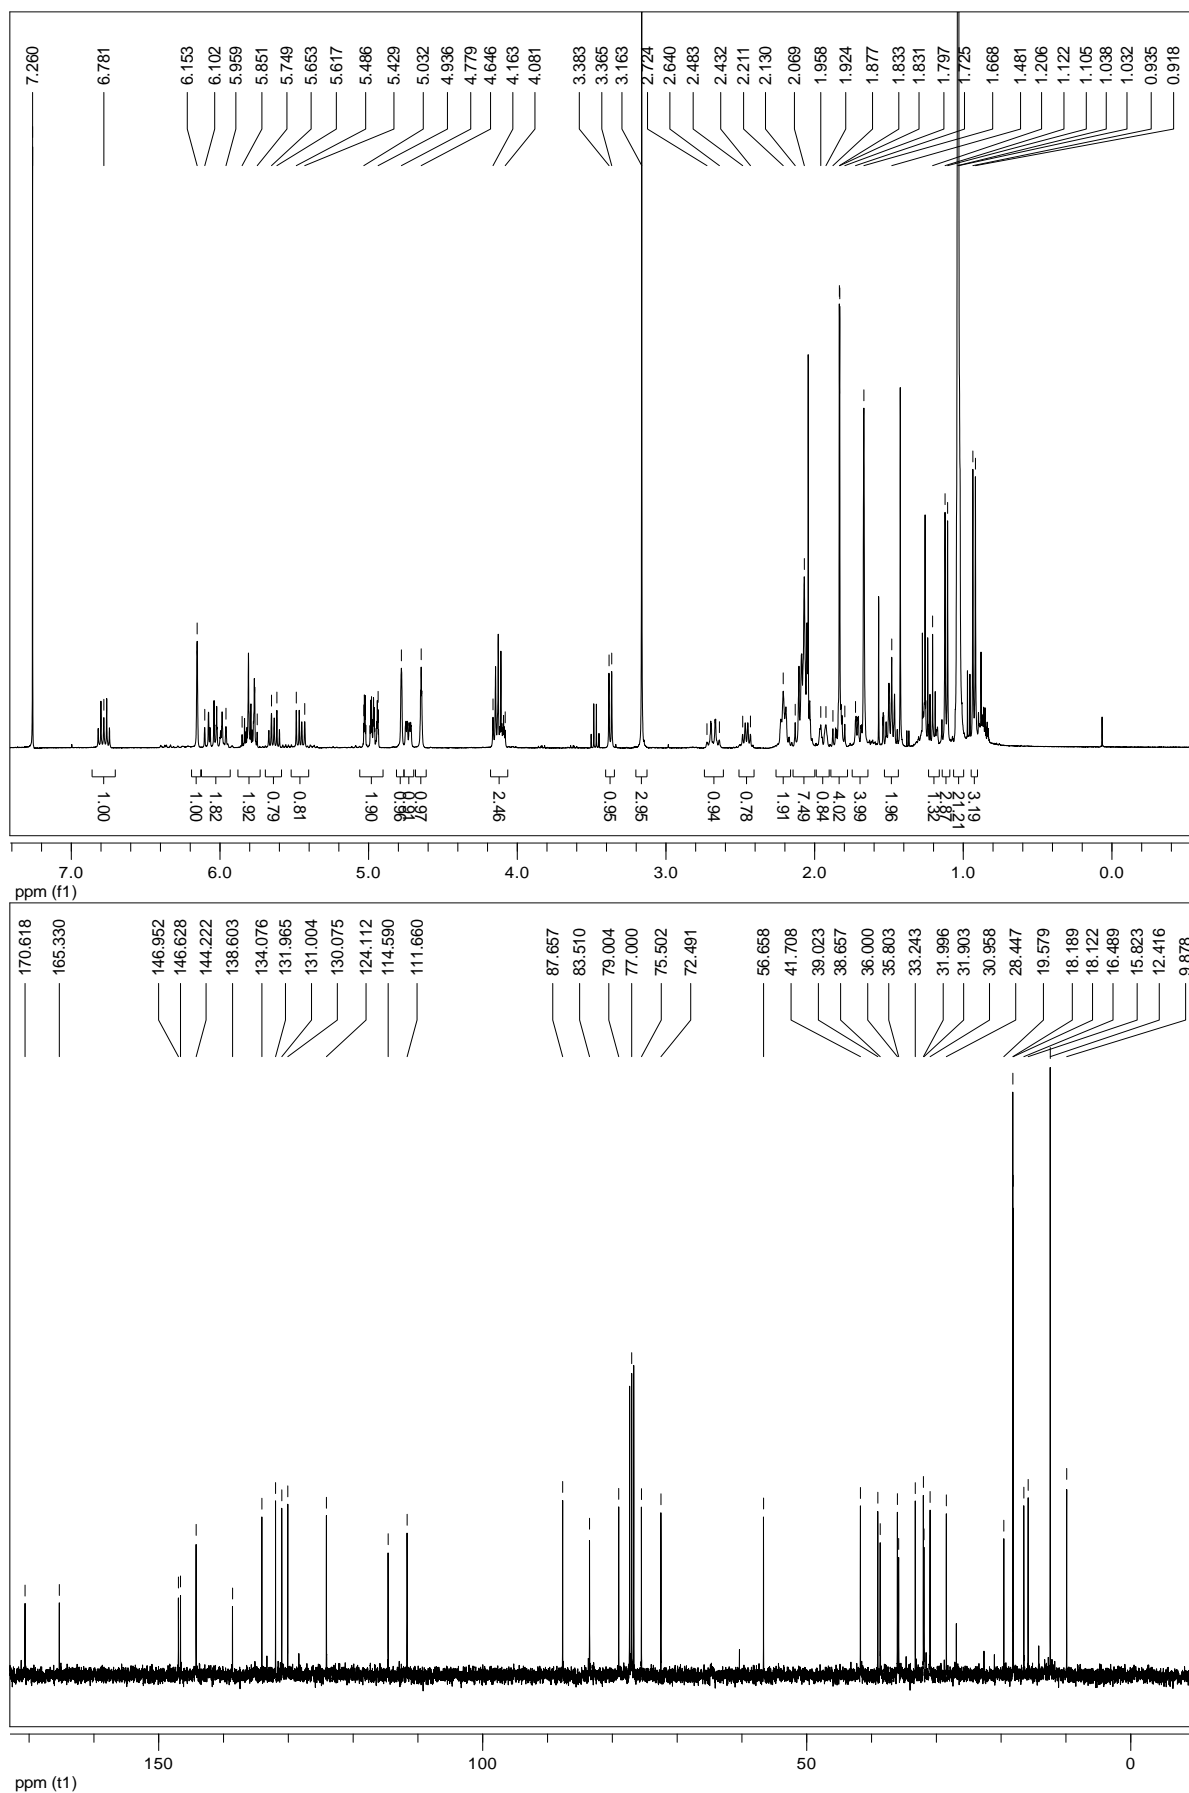



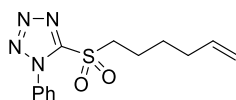

86

**5-(Hex-5-en-1-ylsulfonyl)-1-phenyl-1H-tetrazole:** To a solution of 5-hexen-1-ol (**85**) (135  $\mu$ L, 1.18 mmol, 1.00 eq), phenyltetrazole thiol (240 mg, 1.35 mmol, 1.15 eq) and  $\text{PPh}_3$  (353 mg, 1.35 mmol, 1.15 eq) in THF (6 mL) was added DEAD (212  $\mu$ L, 1.35 mmol, 1.15 eq) dropwise at rt. The orange colour of the drops discharged upon contact with the mixture until the very last drops and a slight warming was observed. The resulting pale yellow solution was stirred for 3 h. Then EtOH (10 mL) was added and the reaction was cooled to 0  $^{\circ}\text{C}$ . Afterwards a previously prepared solution of ammonium molybdate tetrahydrate (229 mg, 0.185 mmol, 16 mol%) in aqueous  $\text{H}_2\text{O}_2$  (30%, 1.86 mL) was added *via* pipette. The cooling was removed after a few minutes and the mixture was stirred at rt overnight. Then it was diluted with water (40 mL) and dichloromethane. The layers were separated and the aqueous phase was extracted with  $\text{CH}_2\text{Cl}_2$  (3 $\times$ 20 mL). The combined organic extracts were washed with brine and concentrated under reduced pressure. The dark orange crude was purified by column chromatography (hex:EtOAc 5:1) to afford the title compound **86** (269 mg, 78%) as a pale yellow oil.

**TLC** (hex:EtOAc 5:1):  $R_f$  = 0.30

**$^1\text{H-NMR}$**  ( $\text{CDCl}_3$ , 400.1 MHz):  $\delta$  = 7.72-7.67 (m, 2H), 7.65-7.57 (m, 3H), 5.77 (tdd,  $J$  = 6.7 Hz,  $J$  = 10.2 Hz,  $J$  = 16.9 Hz, 1H), 5.09-4.96 (m, 2H), 3.75 ( $m_c$ , 2H), 2.13 ( $m_c$ , 2H), 1.98 ( $m_c$ , 2H), 1.61 ( $m_c$ , 2H).

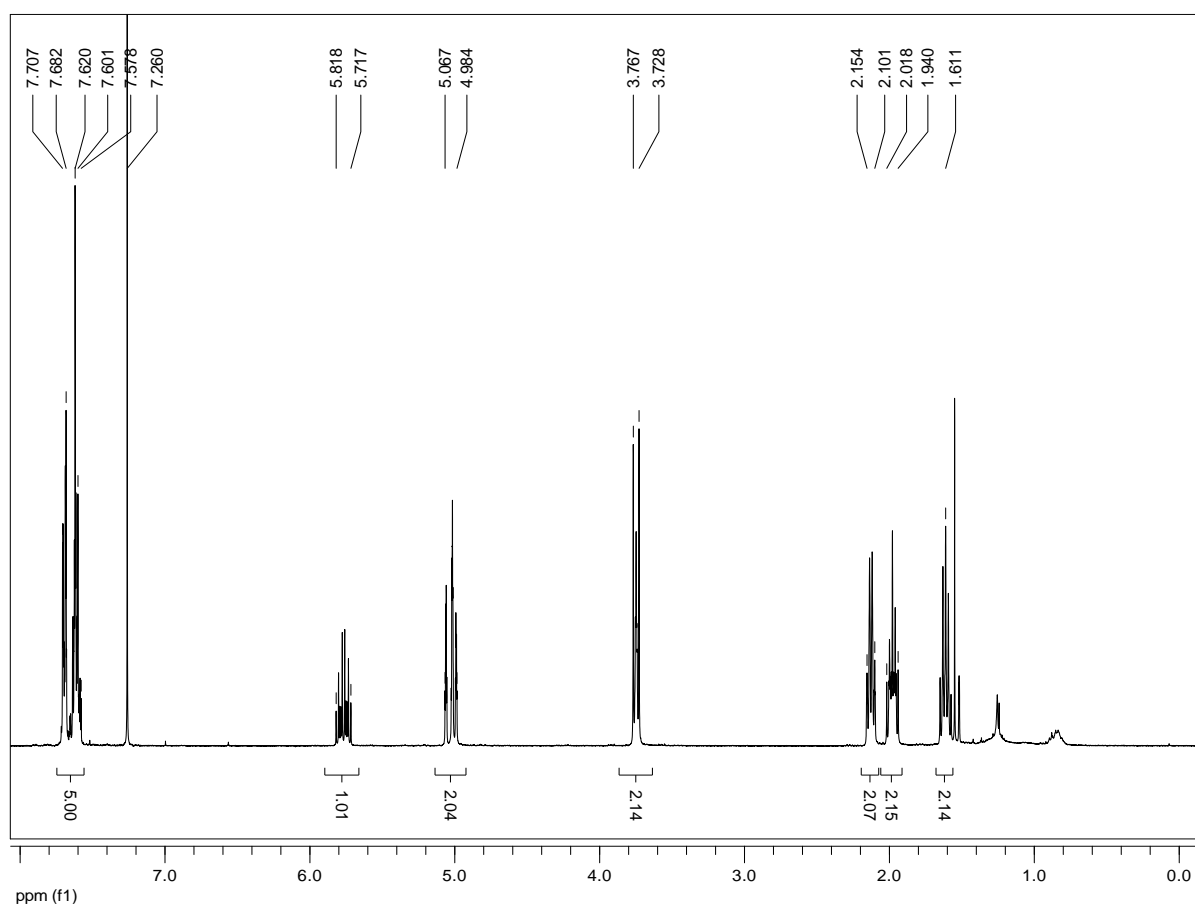

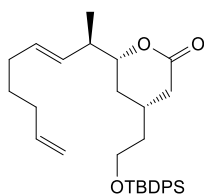

S22

**(4*R*,6*R*)-4-(2-((*tert*-Butyldiphenylsilyl)oxy)ethyl)-6-((*R,E*)-nona-3,8-dien-2-yl)tetrahydro-2H-pyran-2-one (S22):** To a solution of the sulfone **86** (173 mg, 0.590 mmol, 1.30 eq) in THF (4.30 mL) was added solid NaHMDS (108 mg, 0.590 mmol, 1.30 eq) at  $-78\text{ }^{\circ}\text{C}$ , whereupon the colour turned bright yellow. After 10 min stirring at  $-78\text{ }^{\circ}\text{C}$ , the cooling was removed, allowing for the mixture to warm to  $-9\text{ }^{\circ}\text{C}$ . After another 5 min, the mixture was re-cooled to  $-78\text{ }^{\circ}\text{C}$  and after a total of 20 min a solution of the aldehyde **66** (217 mg crude) in THF (0.3 mL, rinsed with  $2\times 0.2\text{ mL}$ ) was added. The reaction was aged 1 h at  $-78\text{ }^{\circ}\text{C}$  and was then warmed to  $-50\text{ }^{\circ}\text{C}$  (MeCN/dry ice). After 45 min stirring at  $-50\text{ }^{\circ}\text{C}$ , the mixture was allowed to warm to  $-19\text{ }^{\circ}\text{C}$  (ice/NaCl), whereupon the yellow colour faded slightly. After 30 min stirring at  $-19\text{ }^{\circ}\text{C}$  the mixture was allowed to warm to  $0\text{ }^{\circ}\text{C}$ . Only at  $0\text{ }^{\circ}\text{C}$  a white precipitate formed. After 1.5 h at  $0\text{ }^{\circ}\text{C}$ , pH7 buffer solution was added and the layers were separated. The aqueous layer was extracted with Et<sub>2</sub>O ( $3\times 10\text{ mL}$ ). The combined organic extracts were washed with brine, dried over MgSO<sub>4</sub>, filtered and concentrated under reduced pressure. The crude was purified by column chromatography (hexane/EtOAc, 5:1) to afford the desired compound **S22** (185 mg, 78% wt/wt along with sulfone, 143 mg, 62% over 2 steps) as a colourless oil.

**<sup>1</sup>H-NMR** (CDCl<sub>3</sub>, 400.1 MHz):  $\delta$  = 7.67-7.57 (m, 4H), 7.47-7.35 (m, 6H), 5.87-5.70 (m, 1H), 5.54-5.39 (m, 1H), 5.32 (tdd,  $J$  = 1.2 Hz,  $J$  = 8.0 Hz,  $J$  = 15.4 Hz, 1H), 4.99 (ddd,  $J$  = 1.6 Hz,  $J$  = 3.7 Hz,  $J$  = 17.3 Hz, 1H), 4.95 (tdd,  $J$  = 1.2 Hz,  $J$  = 2.2 Hz,  $J$  = 10.2 Hz, 1H), 4.05 (ddd,  $J$  = 2.9 Hz,  $J$  = 6.3 Hz,  $J$  = 11.8 Hz, 1H), 3.69 (m<sub>c</sub>, 2H), 2.64 (ddd,  $J$  = 1.8 Hz,  $J$  = 5.5 Hz,  $J$  = 17.1 Hz, 1H), 2.35 (m<sub>c</sub>, 1H), 2.20-1.93 (m, 6H), 1.89 (m<sub>c</sub>, 1H), 1.61 (td,  $J$  = 7.5 Hz,  $J$  = 14.9 Hz, 1H), 1.57-1.50 (m, 2H), 1.49-1.40 (m, 2H), 1.19-1.09 (m, 1H), 1.07 (d,  $J$  = 6.8 Hz, 3H), 1.05 (s, 9H).

**<sup>13</sup>C-NMR** (CDCl<sub>3</sub>, 100.6 MHz):  $\delta$  = 171.5, 138.7, 135.5, 133.58, 133.54, 131.9, 130.6, 129.8, 127.7, 114.6, 84.0, 60.8, 41.9, 38.8, 36.4, 33.2, 32.3, 32.0, 28.6, 28.4, 26.9 19.2, 16.1.

**HRMS** Calcd. for C<sub>32</sub>H<sub>44</sub>NaO<sub>3</sub>Si [M+Na]<sup>+</sup>  $m/z$  527.2952. Found: 527.2952.

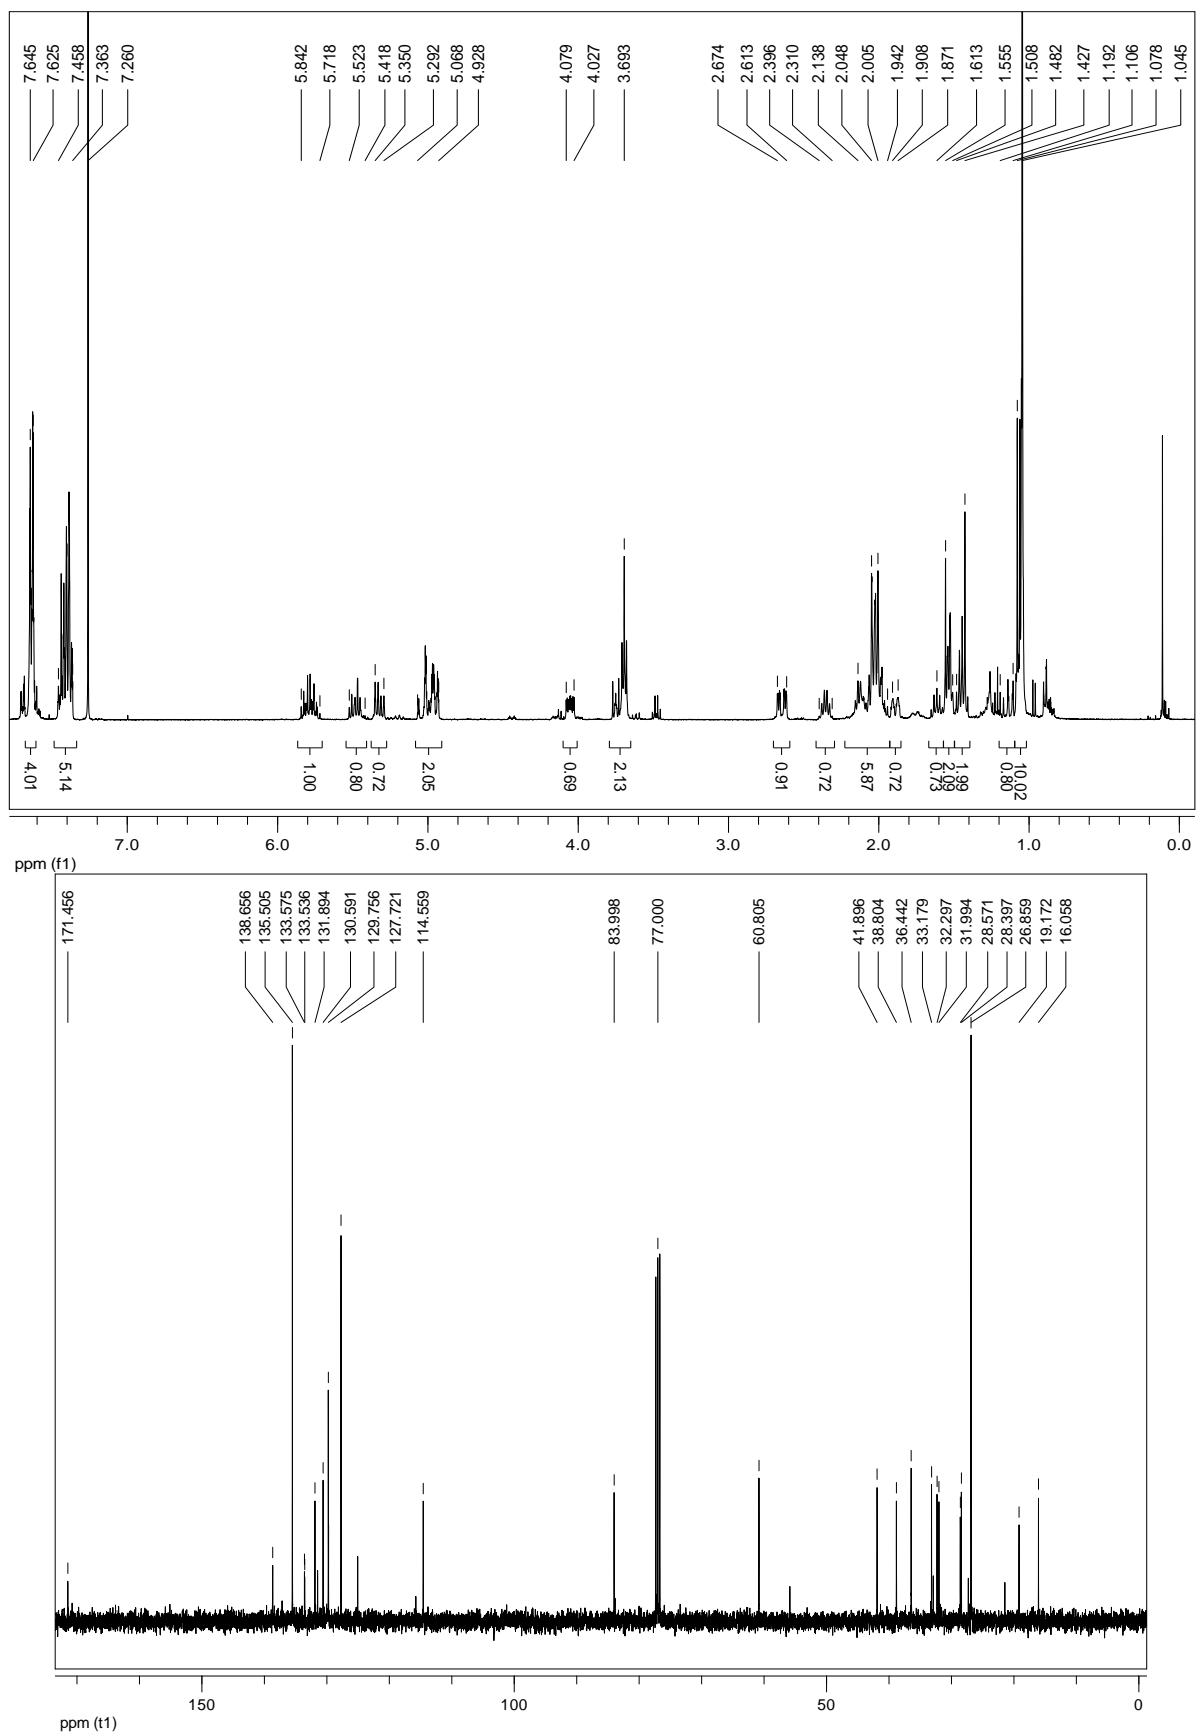

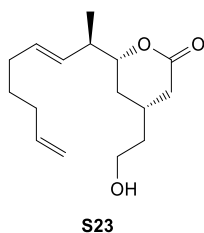

**(4*R*,6*R*)-4-(2-Hydroxyethyl)-6-((*R,E*)-nona-3,8-dien-2-yl)tetrahydro-2H-pyran-2-one (S23):** To a cooled (0 °C) solution of the silyl ether **S22** (143 mg, 283  $\mu$ mol, 1.00 eq) in THF (0.6 mL) were added AcOH (12.2  $\mu$ L, 0.217 mmol, 4.00 eq) and TBAF (0.217 mL 1.0 M in THF, 0.217 mmol, 4.0 equiv). The cooling was removed after 5-10 min and the mixture was stirred at rt for 19 h. Then, the reaction mixture was quenched with sat. NH<sub>4</sub>Cl and the layers were separated. The aqueous phase was extracted with EtOAc (3 x 10 mL). The combined organic extracts were washed with brine, dried over MgSO<sub>4</sub> and the solvent was removed under reduced pressure. The residue was purified by column chromatography (hex/EtOAc, 1:1  $\rightarrow$  0:1) to give the primary alcohol **S23** as a colorless oil (74.2 mg, 95% wt/wt along with EtOAc, 70.5 mg, 94%).

**TLC** (EtOAc):  $R_f$  = 0.43

**<sup>1</sup>H-NMR** (CDCl<sub>3</sub>, 400.1 MHz):  $\delta$  = 5.80 (tdd,  $J$  = 6.7 Hz,  $J$  = 10.2 Hz,  $J$  = 16.9 Hz, 1H), 5.50 (dtd,  $J$  = 0.6 Hz,  $J$  = 6.6 Hz,  $J$  = 15.2 Hz, 1H), 5.33 (tdd,  $J$  = 1.3 Hz,  $J$  = 8.0 Hz,  $J$  = 15.4 Hz, 1H), 5.00 (ddd,  $J$  = 1.7 Hz,  $J$  = 3.7 Hz,  $J$  = 17.3 Hz, 1H), 4.95 (tdd,  $J$  = 1.2 Hz,  $J$  = 2.2 Hz,  $J$  = 10.2 Hz, 1H), 4.09 (ddd,  $J$  = 2.9 Hz,  $J$  = 6.5 Hz,  $J$  = 11.8 Hz, 1H), 3.71 (t,  $J$  = 6.3 Hz, 2H), 2.73 (m<sub>c</sub>, 1H), 2.38 (m<sub>c</sub>, 1H), 2.19-1.93 (m, 7H), 1.58 (m<sub>c</sub>, 2H), 1.45 (m<sub>c</sub>, 2H), 1.24-1.11 (m, 1H), 1.09 (d,  $J$  = 6.8 Hz, 3H).

**<sup>13</sup>C-NMR** (CDCl<sub>3</sub>, 100.6 MHz):  $\delta$  = 171.4, 138.7, 132.0, 130.6, 114.6, 83.9, 59.7, 42.0, 38.8, 36.4, 33.2, 32.4, 32.0, 28.6, 28.3, 16.1.

**HRMS** Calcd. for C<sub>16</sub>H<sub>27</sub>O<sub>3</sub> [M+H]<sup>+</sup>  $m/z$  267.1955. Found: 267.1954.

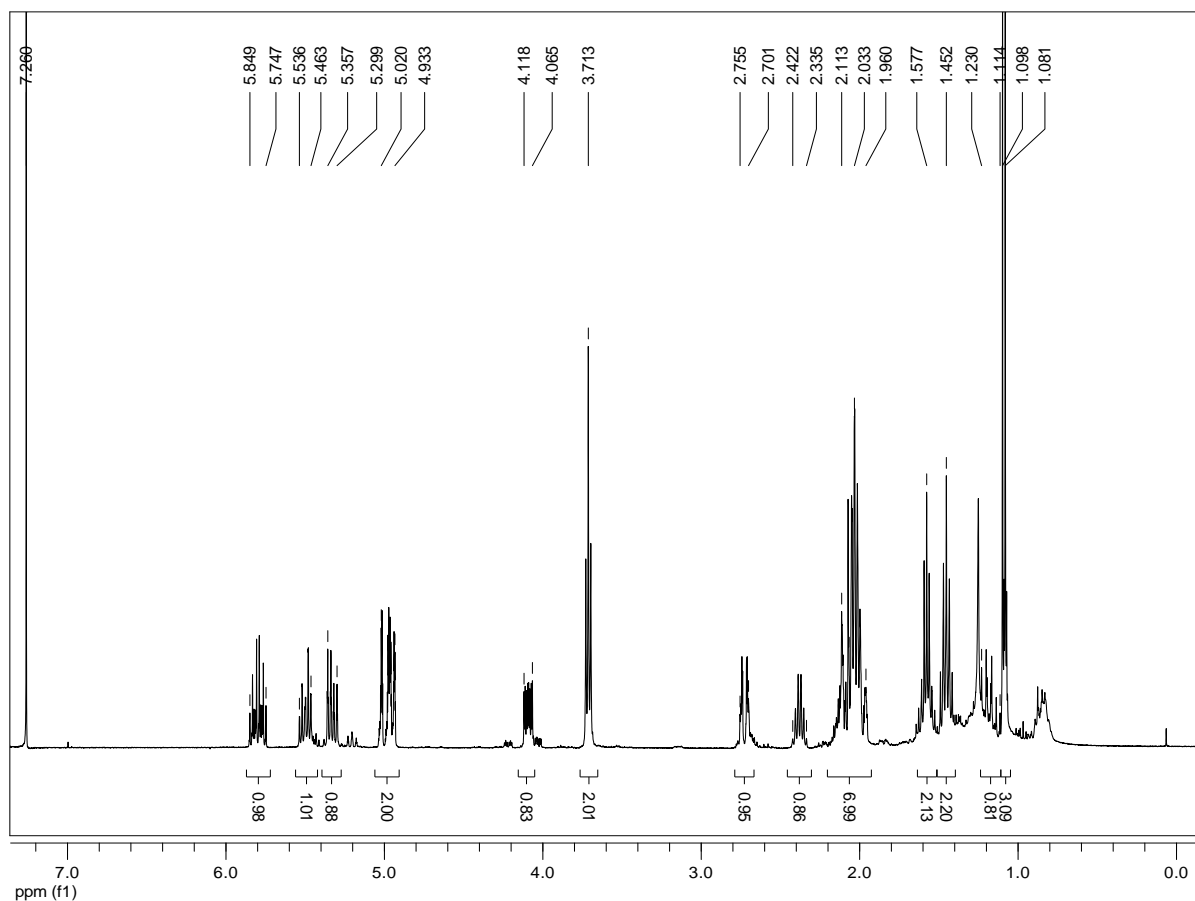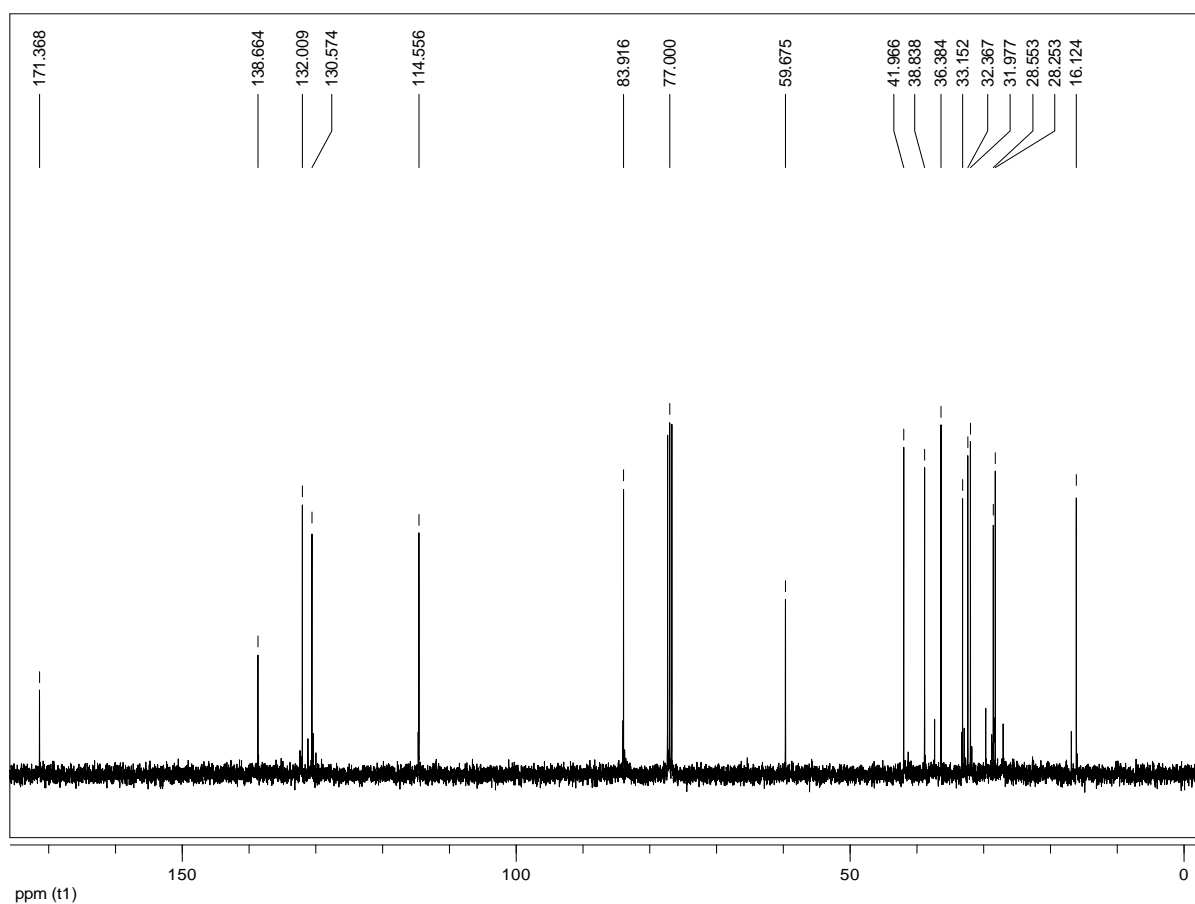

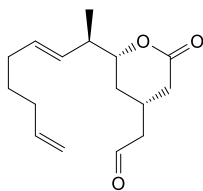

87

**2-((2R,4S)-2-((R,E)-Nona-3,8-dien-2-yl)-6-oxotetrahydro-2H-pyran-4-**

**yl)acetaldehyde (87):** To a solution of oxalyl chloride (34.8  $\mu$ L, 0.414 mmol, 1.55 eq) in  $\text{CH}_2\text{Cl}_2$  (3.0 mL) was added a solution of DMSO (58.8  $\mu$ L, 0.827 mmol, 3.10 eq) dropwise at  $-78^\circ\text{C}$ . After stirring at  $-78^\circ\text{C}$  for 10 min, a solution of the primary alcohol **S23** (71.1 mg, 0.267 mmol, 1.00 equiv) in  $\text{CH}_2\text{Cl}_2$  (1.9 mL + 1.9 mL + 1.1 mL) was added dropwise. The resulting cloudy mixture was stirred at  $-78^\circ\text{C}$  for 1 h, and then  $\text{NEt}_3$  (149  $\mu$ L, 1.07 mmol, 4.00 eq) was added slowly and the reaction mixture was allowed to warm to rt. After another 40 min stirring, the reaction was quenched with water (5 mL). The layers were separated, the aqueous phase was extracted with  $\text{CH}_2\text{Cl}_2$  (3 x 10 mL) and the combined organic extracts were washed with brine, dried over  $\text{MgSO}_4$  and concentrated *in vacuo*. The crude was purified by column chromatography (hex/EtOAc, 2:1 $\rightarrow$ 1:1) to afford the desired aldehyde **87** (61.6 mg, 92%, *E:Z* = 9.6:1) as a colorless oil.

**TLC** (hex:EtOAc 1:1):  $R_f$  = 0.40

**$^1\text{H-NMR}$**  ( $\text{CDCl}_3$ , 400.1 MHz):  $\delta$  = 9.76 (bs, 1H), 5.79 (tdd,  $J$  = 6.7 Hz,  $J$  = 10.2 Hz,  $J$  = 16.9 Hz, 1H), 5.50 (dtd,  $J$  = 0.7 Hz,  $J$  = 6.7 Hz,  $J$  = 15.4 Hz, 1H), 5.31 (tdd,  $J$  = 1.3 Hz,  $J$  = 8.0 Hz,  $J$  = 15.4 Hz, 1H), 4.99 (ddd,  $J$  = 1.6 Hz,  $J$  = 3.6 Hz,  $J$  = 17.1 Hz, 1H), 4.95 (tdd,  $J$  = 1.2 Hz,  $J$  = 2.2 Hz,  $J$  = 10.2 Hz, 1H), 4.13 (ddd,  $J$  = 2.9 Hz,  $J$  = 6.5 Hz,  $J$  = 11.7 Hz, 1H), 2.76 ( $m_c$ , 1H), 2.59-2.43 (m, 3H), 2.37 ( $m_c$ , 1H), 2.15-1.96 (m, 6H), 1.45 ( $m_c$ , 2H), 1.28-1.12 (m, 1H), 1.08 (d,  $J$  = 6.8 Hz, 3H).

**$^{13}\text{C}\{^1\text{H}\}\text{-NMR}$**  ( $\text{CDCl}_3$ , 100.6 MHz):  $\delta$  = 199.6, 170.5, 138.6, 132.2, 130.3, 114.6, 83.6, 49.9, 41.9, 35.9, 33.1, 32.0, 32.01, 31.96, 28.5, 25.9, 16.1.

**HRMS** Calcd. for  $\text{C}_{16}\text{H}_{28}\text{NO}_3$   $[\text{M}+\text{NH}_4]^+$   $m/z$  268.2064. Found: 268.2077.

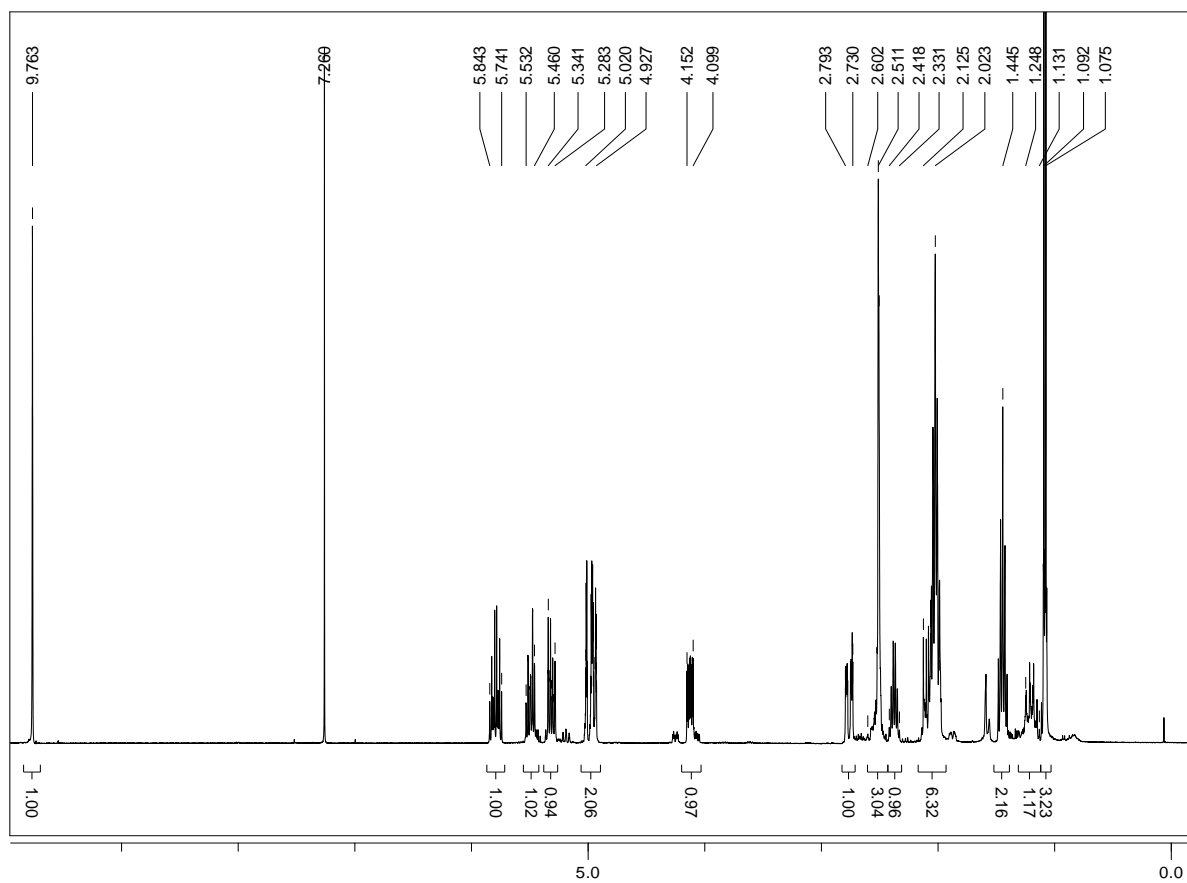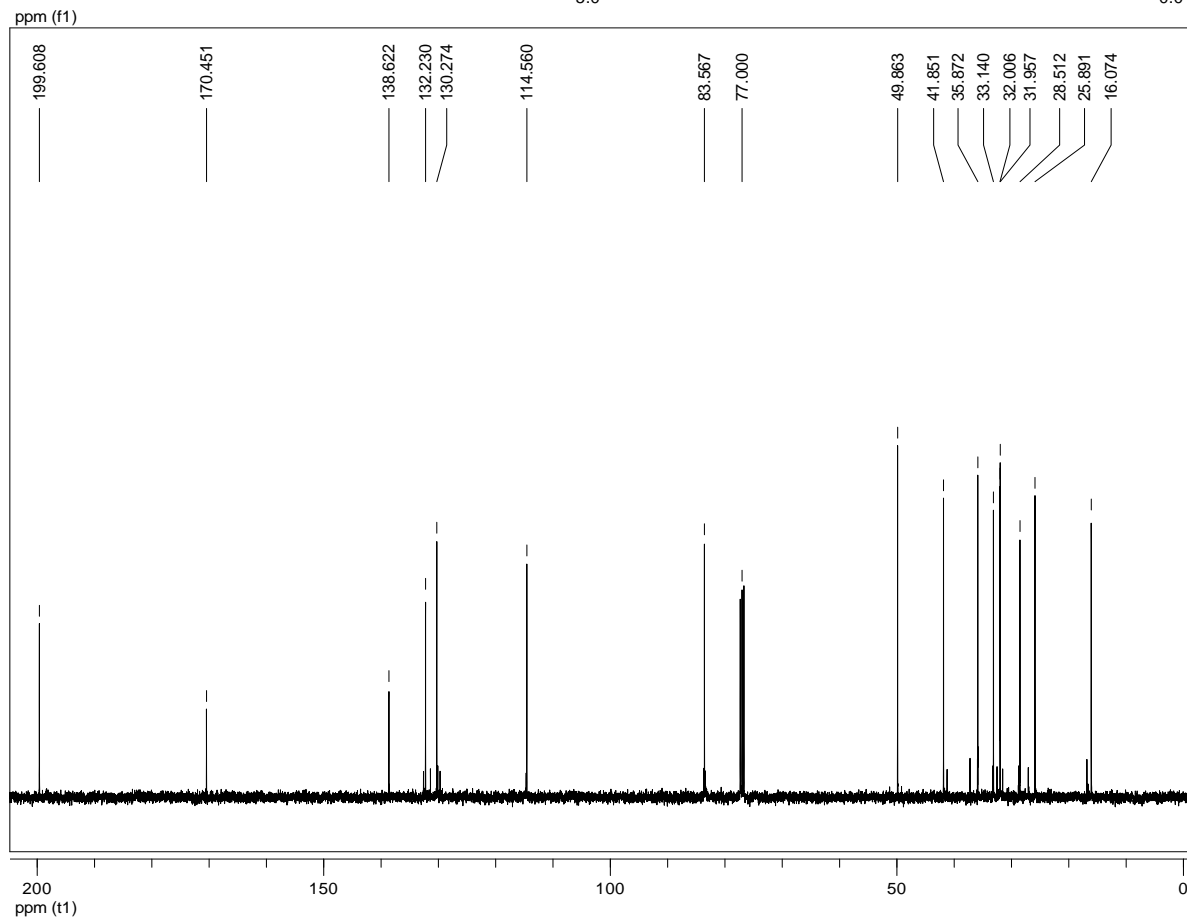



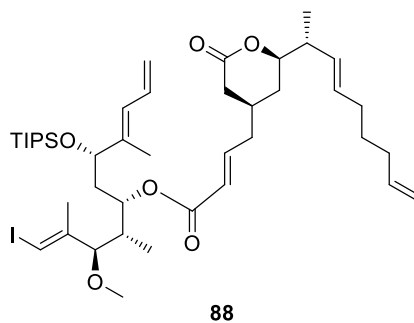

**(1*E*,3*R*,4*S*,5*S*,7*S*,8*E*)-1-Iodo-3-methoxy-2,4,8-trimethyl-7-((triisopropylsilyl)oxy)-undeca-1,8,10-trien-5-yl (*E*)-4-((2*R*,4*R*)-2-((*R*,*E*)-nona-3,8-dien-2-yl)-6-oxotetrahydro-2*H*-pyran-4-yl)but-2-enoate (**88**):** To LiCl (5.8 mg, 138  $\mu$ mol, 1.20 eq) was added a solution of the phosphonate **69** (98.3 mg, 138  $\mu$ mol, 1.20 eq) in MeCN (0.3 mL, rinsed with 2 $\times$ 0.3 mL), followed by DBU (19.0  $\mu$ L, 126  $\mu$ mol, 1.10 eq). After 15 min stirring at rt, the pale yellow mixture was cooled to 0  $^{\circ}$ C, whereupon the solution turned turbid. As the precipitate settled, stirring became difficult. After 20 min, a solution of the aldehyde **87** (30.3 mg, 115  $\mu$ mol, 1.00 eq) in MeCN (1.1 mL) was added. The mixture was stirred for 20 min at 0  $^{\circ}$ C and was then allowed to warm to rt. TLC reaction control after 50 min indicated, that no aldehyde was left. Thus, the mixture was concentrated at a rotavap and the residue was purified by flash chromatography (hex:EtOAc 5:1) to afford the desired product **88** (80.4 mg after HV, 85%) as a colourless oil.

**$^1\text{H-NMR}$**  ( $\text{CDCl}_3$ , 400.1 MHz):  $\delta$  = 6.74 (td,  $J$  = 7.4 Hz,  $J$  = 15.0 Hz, 1H), 6.43 (td,  $J$  = 10.4 Hz,  $J$  = 16.9 Hz, 1H), 6.16 (bs, 1H), 5.88 (d,  $J$  = 10.7 Hz, 1H), 5.85-5.72 (m, 2H), 5.51 (td,  $J$  = 6.8 Hz,  $J$  = 14.9 Hz, 1H), 5.33 (tdd,  $J$  = 1.2 Hz,  $J$  = 7.9 Hz,  $J$  = 15.4 Hz, 1H), 5.13 (dd,  $J$  = 1.8 Hz,  $J$  = 16.8 Hz, 1H), 5.06-4.92 (m, 3H), 4.77 (ddd,  $J$  = 1.6 Hz,  $J$  = 4.1 Hz,  $J$  = 10.2 Hz, 1H), 4.16-4.05 (m, 2H), 3.38 (d,  $J$  = 7.2 Hz, 1H), 3.16 (s, 3H), 2.67 ( $m_c$ , 1H), 2.39 ( $m_c$ , 1H), 2.20 (t,  $J$  = 6.3 Hz, 2H), 2.14-1.98 (m, 7H), 1.98-1.90 (m, 1H), 1.90-1.77 (m, 1H), 1.83 (d,  $J$  = 0.9 Hz, 3H), 1.76-1.65 (m, 1H), 1.71 (d,  $J$  = 0.8 Hz, 3H), 1.45 (td,  $J$  = 7.4 Hz,  $J$  = 14.8 Hz, 2H), 1.23-1.14 (m, 1H), 1.09 (d,  $J$  = 6.8 Hz, 3H), 1.06-0.98 (m, 21H), 0.91 (d,  $J$  = 6.9 Hz, 3H);  **$^{13}\text{C}\{^1\text{H}\}\text{-NMR}$**  ( $\text{CDCl}_3$ , 100.6 MHz):  $\delta$  = 170.7, 165.2, 146.5, 144.3, 140.3, 138.6, 132.6, 132.2, 130.3, 126.4, 124.2, 116.9, 114.6, 87.6, 83.6, 79.0, 76.7, 72.5, 56.7, 41.8, 39.0, 38.6, 36.0, 35.7, 33.2, 32.00, 31.98, 31.0, 28.6, 19.7, 18.2, 18.1, 16.0, 12.4, 11.6, 9.8; **HRMS** Calcd. for  $\text{C}_{42}\text{H}_{69}\text{INaO}_6\text{Si}$  [ $\text{M}+\text{Na}$ ] $^+$   $m/z$  847.2800. Found: 847.3813.

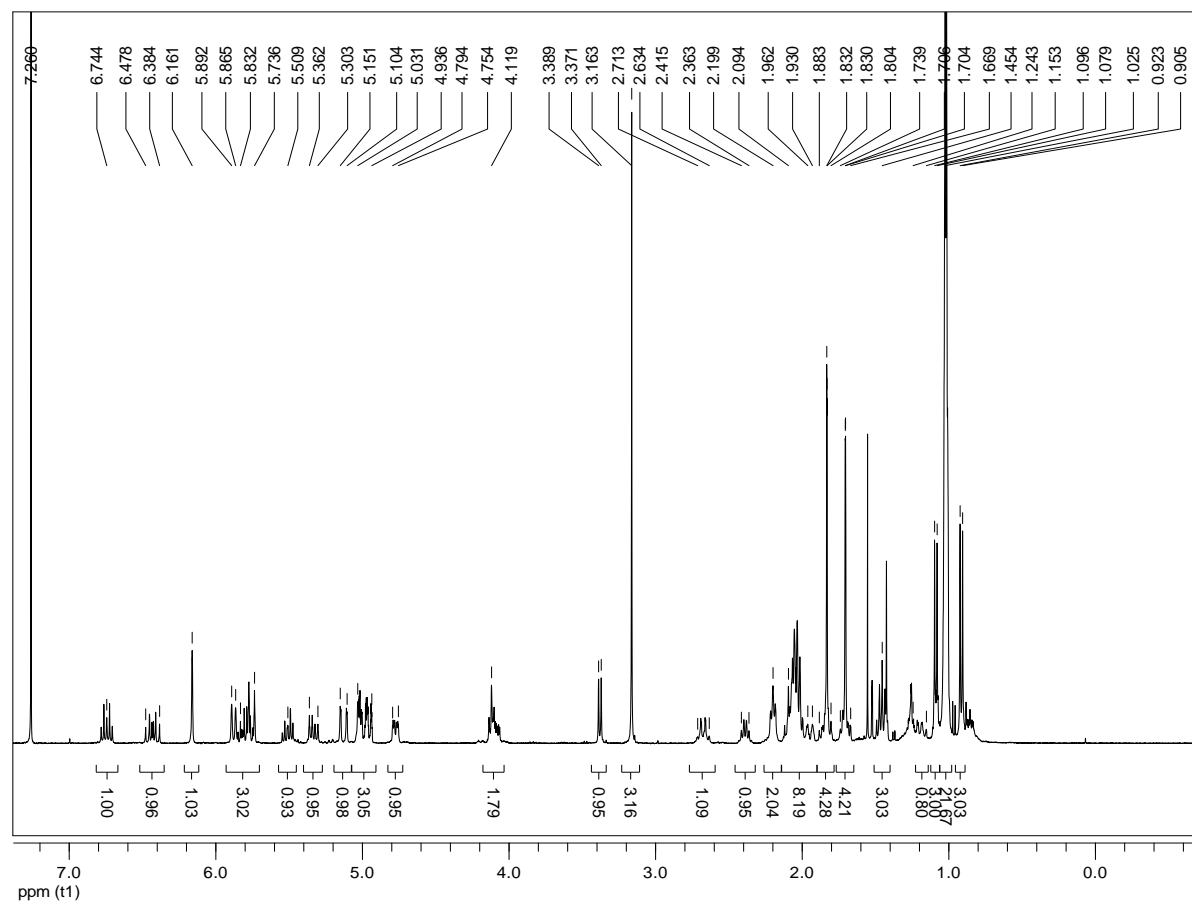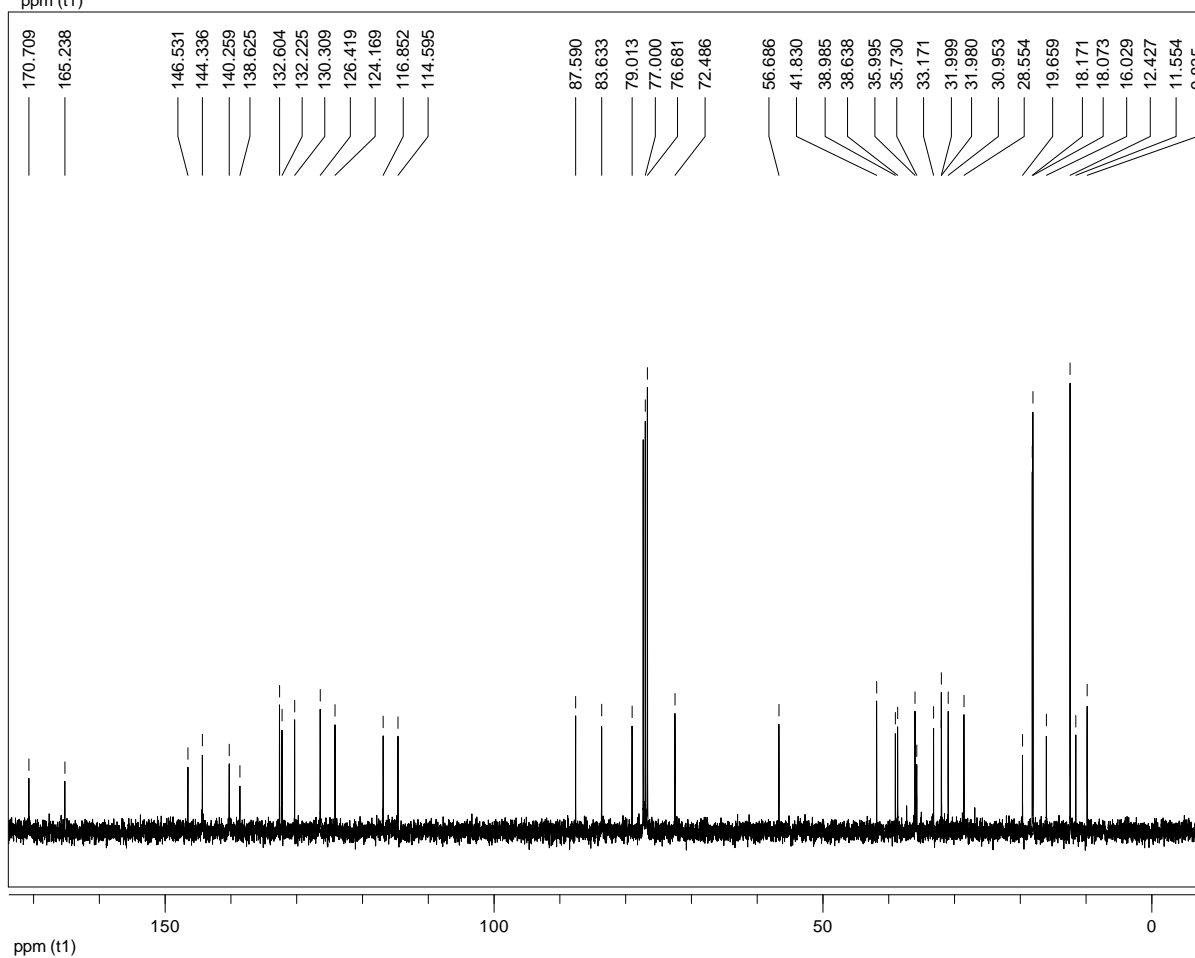

### Attempted preparation of hydroxy ester **90** by opening of lactone **67**:

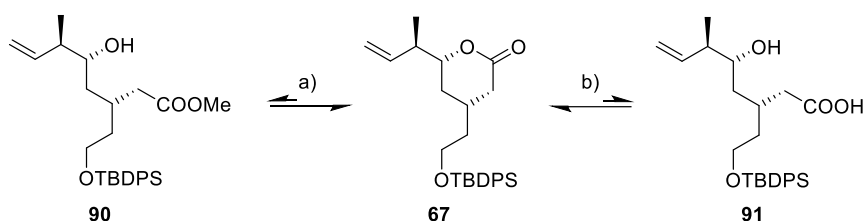

**Lactone opening with LiOMe:** To a solution of lactone **67** (38.0 mg, 87.0  $\mu$ mol, 1.0 equiv) in MeOH (3.0 mL) was added at rt a freshly prepared solution of LiOMe in MeOH (prepared by the addition of *n*-BuLi (0.44 mL, 0.87 mmol, 10 equiv) to 3 mL of MeOH at 0 °C). After stirring for 20 min, conversion was incomplete (TLC) and more LiOMe (10 equiv) was added. After a total reaction time of 60 min the reaction mixture was poured into a mixture of Et<sub>2</sub>O (15 mL) and sat. NH<sub>4</sub>Cl (20 mL). All volatiles were removed under reduced pressure. The aqueous phase was extracted with Et<sub>2</sub>O (3 x 20 mL), the combined organic extracts were dried over MgSO<sub>4</sub> and the solvent was removed under reduced pressure. The residue was purified by column chromatography (hexane/EtOAc, 10:1  $\rightarrow$  7:1) to afford only the starting lactone **67** (37.2 mg, 98%) as a colorless oil.

**Lactone opening with LiOH:** To a solution of **67** (37.2 mg, 85.2  $\mu$ mol, 1.0 equiv) in THF/water (2.5 mL, 1:1 v/v) was added at 0 °C lithium hydroxide monohydrate (35.7 mg, 0.85 mmol, 10 equiv) in one portion. After stirring for 45 min at 0 °C, solid NaH<sub>2</sub>PO<sub>4</sub> monohydrate (200 mL) was added and the reaction mixture was diluted with Et<sub>2</sub>O (15 mL) and aq. 0.2M NaH<sub>2</sub>PO<sub>4</sub> solution (15 mL). The layers were separated and the aqueous layer was extracted with Et<sub>2</sub>O (3 x 15 mL). The combined organic extracts were dried over MgSO<sub>4</sub> and the solvent was removed under reduced pressure. The crude hydroxy acid (38.0 mg, 98%) was isolated as a colorless oil and used without further purification. To a solution of the crude acid (38.0 mg, 83.6  $\mu$ mol, 1.0 equiv) in toluene (0.50 mL) and MeOH (0.34 mL) was added at rt TMSCHN<sub>2</sub> (46.0  $\mu$ L, 92  $\mu$ mol, 1.1 equiv, 2.0M solution in hexane). After stirring for 1 h at rt, the acid was consumed to give lactone **67** exclusively (based on TLC analysis).

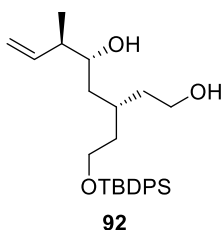

**(3*R*,5*R*,6*R*)-3-(2-((*tert*-Butyldiphenylsilyl)oxy)ethyl)-6-methyloct-7-ene-1,5-diol**

**(92):** To a solution of **67** (28.5 mg, 65.3  $\mu$ mol, 1.0 equiv) in Et<sub>2</sub>O (1.0 mL) was added at 0 °C LiAlH<sub>4</sub> (3.7 mg, 97.5  $\mu$ mol, 1.5 equiv). After stirring for 10 min at 0 °C, the reaction mixture was allowed to warm to rt over 50 min and was quenched at 0 °C by slow addition of sat. *Rochelle* salt (5 mL). The reaction mixture was diluted with Et<sub>2</sub>O (10 mL) and brine (10 mL). The layers were separated and the aqueous layer was extracted with Et<sub>2</sub>O (2 x 15 mL). The combined organic extracts were dried over MgSO<sub>4</sub> and the solvent was removed under reduced pressure. **92** (28.7 mg, quant.) was isolated as a yellowish oil, which was used for the next step without further purification.

**R<sub>f</sub>** = 0.16 (hexane/EtOAc, 2:1)

**<sup>1</sup>H-NMR** (400.1 MHz, CDCl<sub>3</sub>):  $\delta$  = 7.72-7.63 (m, 4H), 7.47-7.33 (m, 6H), 5.73 (ddd,  $J$  = 7.3, 9.8, 17.7 Hz, 1H), 5.12-5.01 (m, 2H), 3.76-3.59 (m, 4H), 3.50 (ddd,  $J$  = 3.1, 5.1, 9.5 Hz, 1H), 2.20 (m<sub>c</sub>, 1H), 2.09-1.81 (brs, 2H), 1.86 (m<sub>c</sub>, 1H), 1.68-1.49 (m, 3H), 1.49-1.28 (m, 3H), 1.05 (s, 9H), 0.98 (d,  $J$  = 6.8 Hz, 3H).

**<sup>13</sup>C-NMR** (100.6 MHz, CDCl<sub>3</sub>):  $\delta$  = 140.8, 135.6, 133.8, 129.6, 127.6, 115.4, 73.3, 62.2, 60.6, 44.0, 38.2, 37.6, 37.5, 28.7, 26.9, 19.1, 14.2.

**HRMS (ESI):**  $m/z$  calcd for C<sub>27</sub>H<sub>40</sub>NaO<sub>3</sub>Si [M + Na]<sup>+</sup>: 463.2639, found: 463.2631.

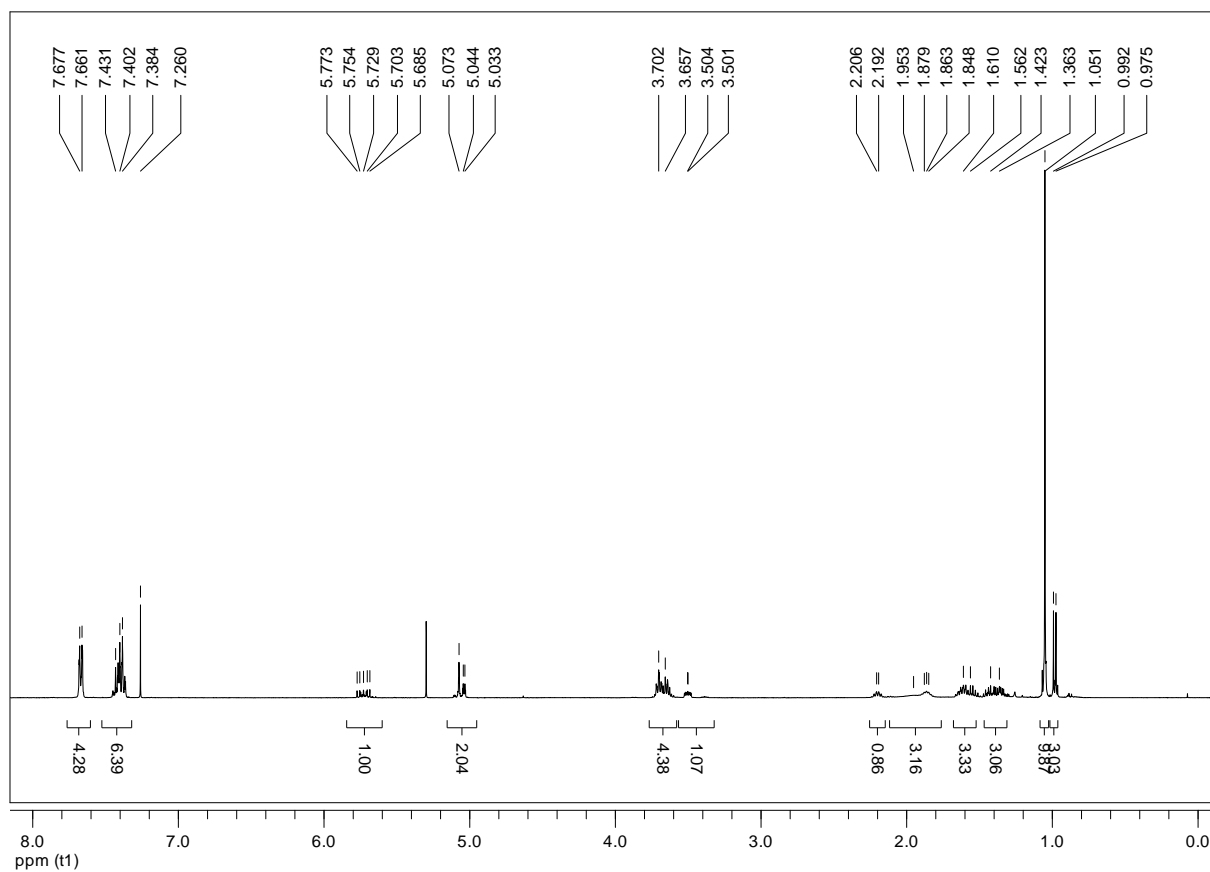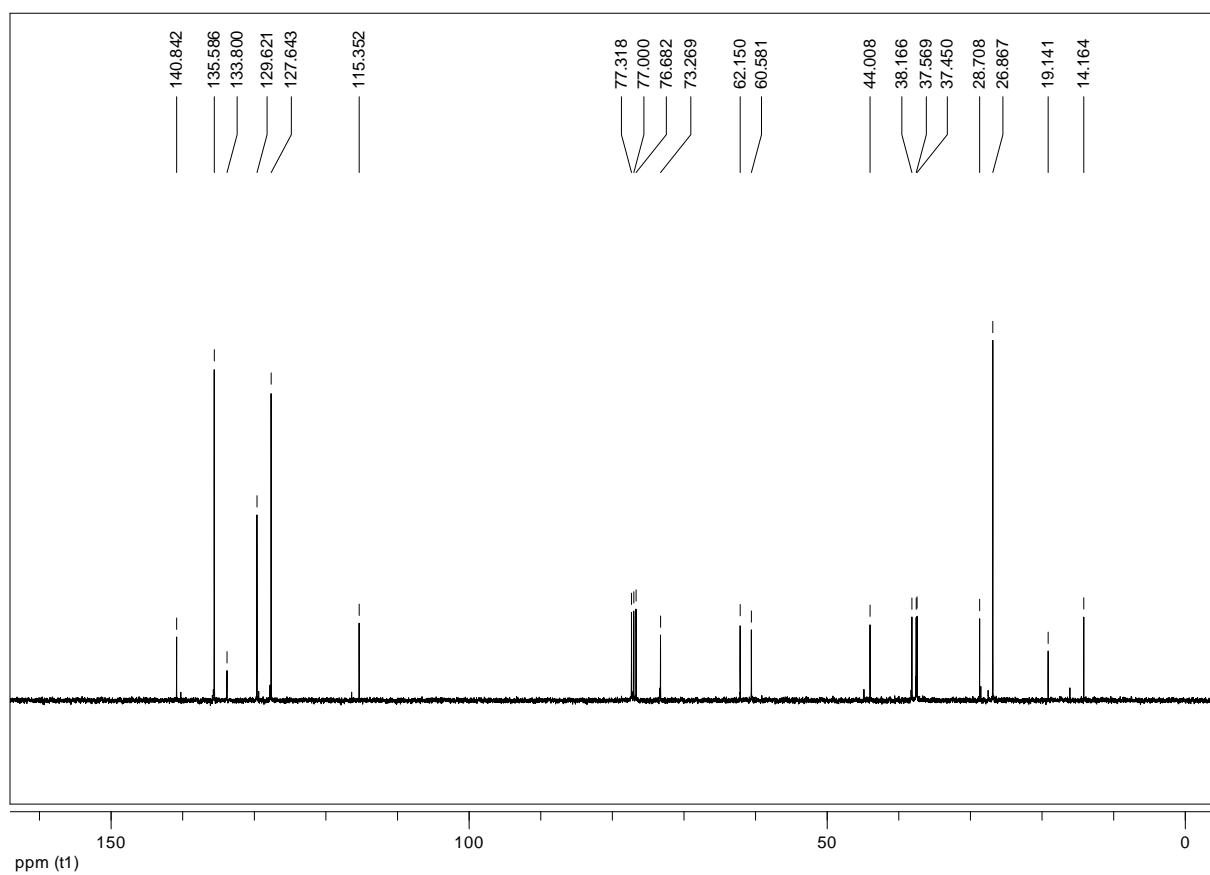

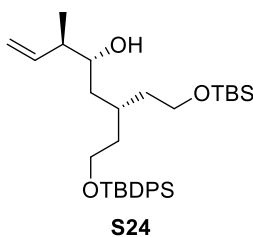

**(3R,4R,6R)-8-((*tert*-Butyldimethylsilyl)oxy)-6-(2-((*tert*-butyldiphenylsilyl)-oxy)ethyl)-3-methyloct-1-en-4-ol (S24):** To a solution of **92** (33.2 mg, 0.08 mmol, 1.0 equiv) in CH<sub>2</sub>Cl<sub>2</sub> (1.1 mL) was added at rt imidazole (10.6 mg, 0.16 mmol, 2.1 equiv) followed by TBSCl (16.3 mg, 0.11 mmol, 1.4 equiv). After stirring for 20 min at rt, the reaction mixture was quenched with brine (10 mL) and diluted with CH<sub>2</sub>Cl<sub>2</sub> (9 mL). The layers were separated and the aqueous layer was extracted with CH<sub>2</sub>Cl<sub>2</sub> (2 x 15 mL). The combined organic extracts were dried over MgSO<sub>4</sub> and the solvent was removed under reduced pressure. The residue was purified by column chromatography (hexane/EtOAc, 10:1) to afford **S24** (40.9 mg, 98% over 2 steps) as a colorless oil.

**R<sub>f</sub>** = 0.26 (hexane/EtOAc, 15:1)

**[α]<sub>D</sub><sup>24</sup>** = +14.0° [*c* = 0.515, CHCl<sub>3</sub>].

**<sup>1</sup>H-NMR** (400.1 MHz, CDCl<sub>3</sub>): δ = 7.71-7.63 (m, 4H), 7.46-7.34 (m, 6H), 5.75 (ddd, *J* = 7.5, 10.7, 16.9 Hz, 1H), 5.09-5.00 (m, 2H), 3.69 (m<sub>c</sub>, 2H), 3.63 (m<sub>c</sub>, 2H), 3.50 (m<sub>c</sub>, 1H), 2.20 (m<sub>c</sub>, 1H), 2.05 (d, *J* = 4.6 Hz, 1H), 1.82 (m<sub>c</sub>, 1H), 1.68-1.41 (m, 4H), 1.40-1.32 (m, 2H), 1.05 (s, 9H), 0.99 (d, *J* = 6.8 Hz, 3H), 0.88 (s, 9H), 0.04 (s, 6H).

**<sup>13</sup>C-NMR** (100.6 MHz, CDCl<sub>3</sub>): δ = 141.2, 135.6, 133.9, 129.6, 127.6, 114.9, 73.0, 62.2, 61.3, 44.0, 38.7, 37.5, 37.0, 29.0, 26.9, 26.0, 19.1, 18.3, 14.5, -5.3.

**IR** (neat, ν/cm<sup>-1</sup>): 3450brs, 2955m, 2929m, 2858m, 1472w, 1428w, 1389w, 1254m, 1106s, 1092s, 1005w, 835m, 776m, 738m, 702s, 614w, 506m.

**HRMS (ESI):** *m/z* calcd for C<sub>33</sub>H<sub>55</sub>O<sub>3</sub>Si<sub>2</sub> [*M* + *H*]<sup>+</sup>: 555.3684, found: 555.3682.

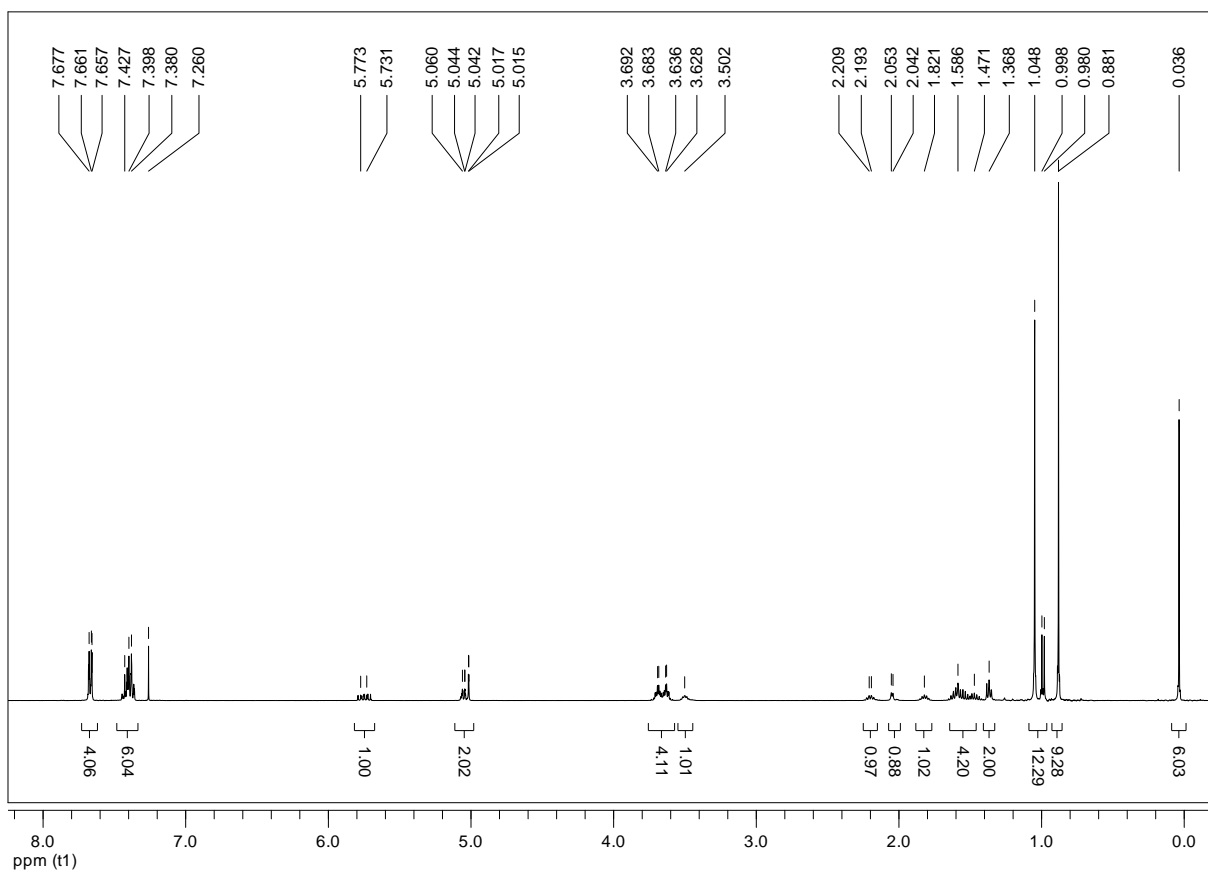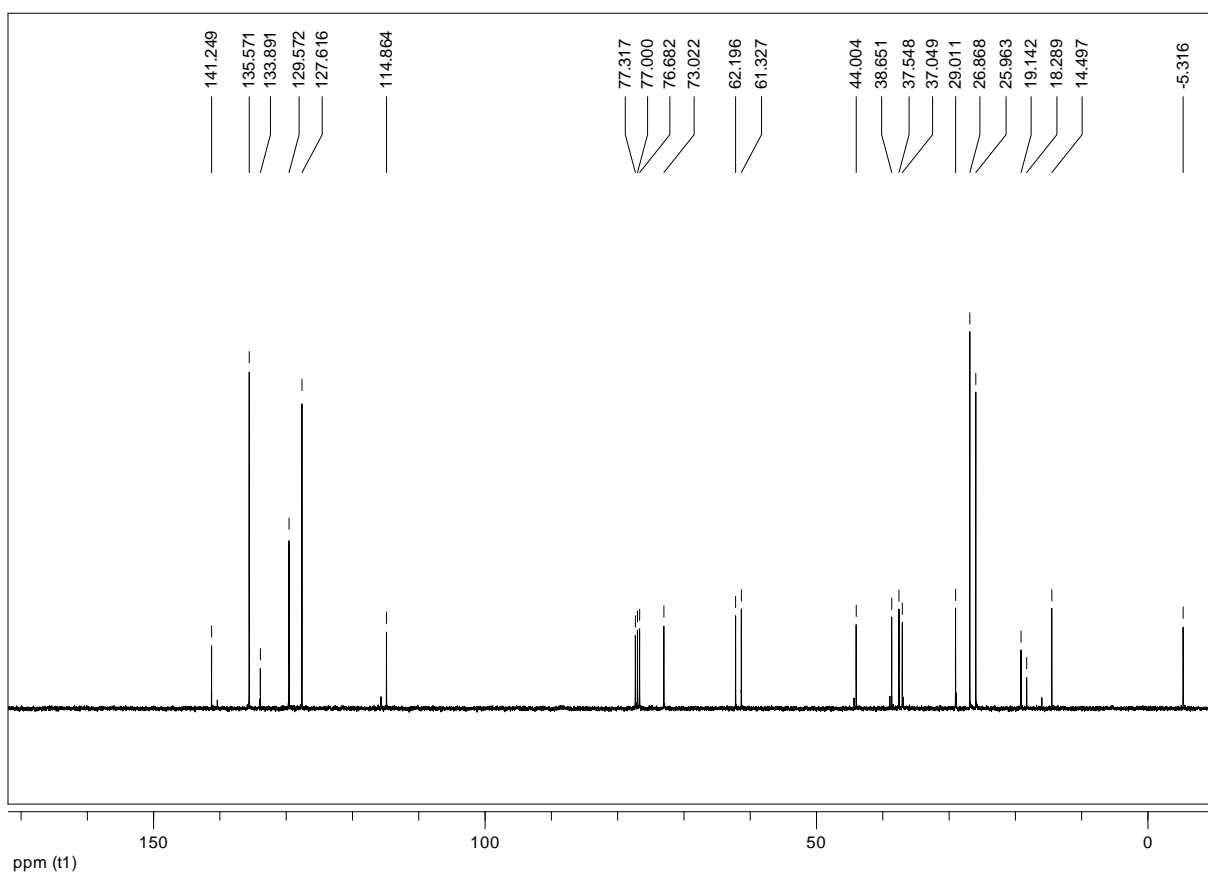

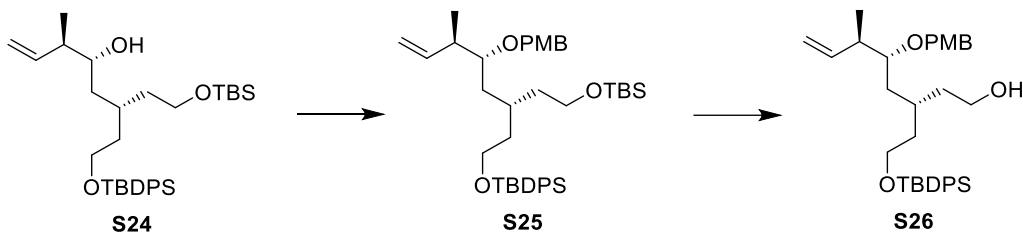

**(3*R*,5*R*,6*R*)-3-(2-((*tert*-Butyldiphenylsilyl)oxy)ethyl)-5-((4-methoxybenzyl)oxy)-6-methyloct-7-en-1-ol (S26):** To a solution of **S24** (40.9 mg, 0.07 mmol, 1.0 equiv) and PMB-2,2,2-trichloroacetimidate (55.0 mg, 0.19 mmol, 2.6 equiv) in toluene (1.5 mL) was added at rt Sc(OTf)<sub>3</sub> (2.3 mg, 6.3 mol%). After stirring for 1.5 h at rt, the reaction mixture was quenched with sat. NaHCO<sub>3</sub> (5 mL) and diluted with brine (10 mL)/Et<sub>2</sub>O (10 mL). The layers were separated and the aqueous layer was extracted with Et<sub>2</sub>O (2 x 20 mL). The combined organic extracts were dried over MgSO<sub>4</sub> and the solvent was removed under reduced pressure. The residue was purified by column chromatography (hexane/EtOAc, 50:1 → 30:1 → 10:1) to afford **S25** (44.1 mg, <89%, impure) as a mixture with impurities originating from PMB-2,2,2-trichloroacetimidate. *R<sub>f</sub>* = 0.38 (hexane/EtOAc, 15:1). To a solution of **S25** (44.1 mg, 65.3 μmol, 1.0 equiv) in THF/water (4:1, 0.71 mL) was added sodium periodate (84.2 mg, 0.39 mmol, 6.0 equiv). After stirring at rt for 15 h, the reaction mixture was quenched with water (10 mL) and diluted with CH<sub>2</sub>Cl<sub>2</sub> (15 mL). The layers were separated and the aqueous layer was extracted with CH<sub>2</sub>Cl<sub>2</sub> (2 x 20 mL). The combined organic extracts were dried over MgSO<sub>4</sub> and concentrated under reduced pressure. The residue was purified by column chromatography (hexane/EtOAc, 5:1 → 4:1) to give **S26** (27.8 mg, 76%, 67% over 2 steps) as a colorless oil.

**R<sub>f</sub>** = 0.14 (hexane/EtOAc, 5:1)

$$[\alpha]_{\text{D}}^{24} = +34.0^{\circ} [c = 0.365, \text{CHCl}_3]$$

**<sup>1</sup>H-NMR** (400.1 MHz, CDCl<sub>3</sub>): δ = 7.73-7.61 (m, 4H), 7.49-7.33 (m, 6H), 7.21 (d, *J* = 8.7 Hz, 2H), 6.83 (d, *J* = 8.7 Hz, 2H), 5.86 (ddd, *J* = 6.8, 11.4, 16.3 Hz, 1H), 5.06-4.97 (m, 2H), 4.53 (d, *J* = 10.8 Hz, 1H), 4.32 (d, *J* = 10.8 Hz, 1H), 3.77 (s, 3H), 3.67 (m<sub>c</sub>, 2H), 3.58 (m<sub>c</sub>, 2H), 3.29 (ddd, *J* = 2.9, 4.3, 9.7 Hz, 1H), 2.55 (m<sub>c</sub>, 1H), 1.89 (brs, 1H), 1.76 (m<sub>c</sub>, 1H), 1.68-1.41 (m, 4H), 1.41-1.30 (m, 1H), 1.28-1.18 (m, 1H), 1.06 (s, 9H), 0.98 (d, *J* = 6.9 Hz, 3H).

**<sup>13</sup>C-NMR** (100.6 MHz, CDCl<sub>3</sub>): δ = 159.1, 140.3, 135.6, 133.9, 130.5, 129.6, 129.4, 127.6, 114.5, 113.8, 81.7, 71.5, 62.0, 60.7, 55.2, 39.9, 37.7, 37.4, 35.2, 28.4, 26.9, 19.2, 15.1.



**IR** (neat,  $\nu/\text{cm}^{-1}$ ): 3423brs, 2931m, 2857m, 1613w, 1513m, 1428m, 1302w, 1248m, 1173w, 1110s, 1084s, 1037m, 822m, 739m, 702s, 506s, 488m.

**HRMS (ESI)**:  $m/z$  calcd for  $\text{C}_{35}\text{H}_{48}\text{NaO}_4\text{Si}$   $[\text{M} + \text{Na}]^+$ : 583.3214, found: 583.3216.

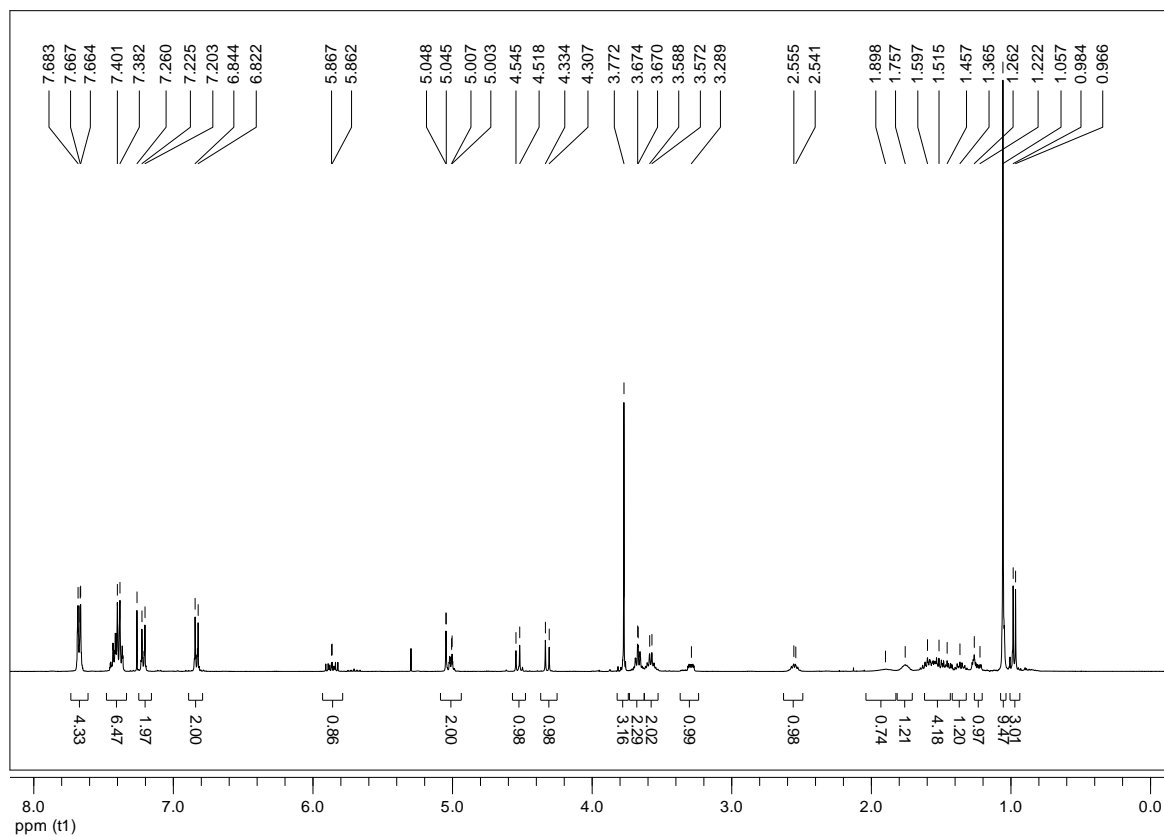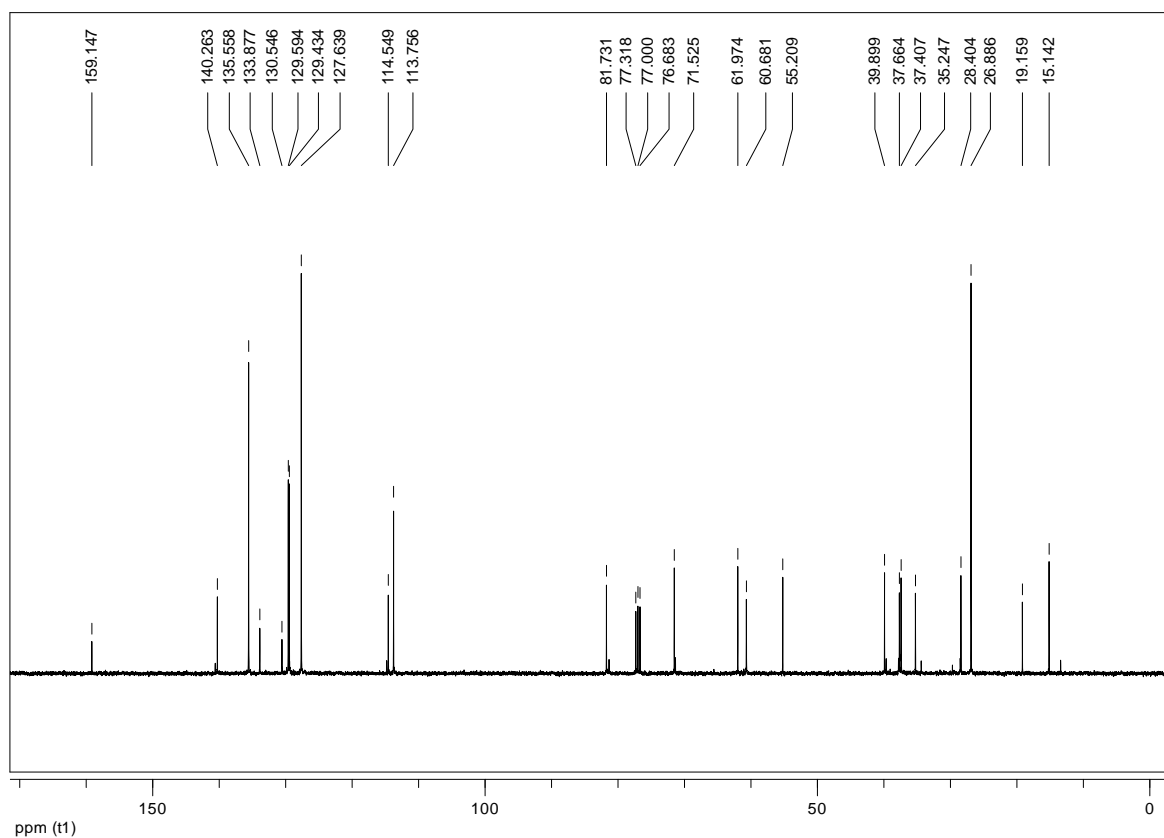

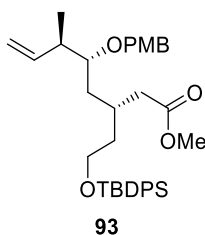

**Methyl (3R,5R,6R)-3-(2-((*tert*-butyldiphenylsilyl)oxy)ethyl)-5-((4-methoxybenzyl)oxy)-6-methyloct-7-enoate (93):** To a solution of oxalyl chloride (6.3  $\mu\text{L}$ , 74.4  $\mu\text{mol}$ , 1.5 equiv) in  $\text{CH}_2\text{Cl}_2$  (0.60 mL) at  $-78^\circ\text{C}$  was added dropwise DMSO (10.6  $\mu\text{L}$ , 149  $\mu\text{mol}$ , 3.0 equiv). After stirring at  $-78^\circ\text{C}$  for 10 min, a solution of **S26** (27.8 mg, 49.6  $\mu\text{mol}$ , 1.0 equiv) in  $\text{CH}_2\text{Cl}_2$  (0.9 mL) was added dropwise. The resultant cloudy mixture was stirred at  $-78^\circ\text{C}$  for 1.5 h, and then TEA (27.6  $\mu\text{L}$ , 198  $\mu\text{mol}$ , 4.0 equiv) was added slowly and the reaction mixture was allowed to warm to room temperature (1 h). The reaction was quenched with water (10 mL), and the layers were separated. The aqueous phase was extracted with  $\text{CH}_2\text{Cl}_2$  (3 x 20 mL) and the combined organic extracts were washed with brine, dried over  $\text{MgSO}_4$ , filtered and concentrated *in vacuo*. The crude aldehyde (34.3 mg) was isolated as colorless crystals and was used for the next step without further purification.

To a solution of the aldehyde (34.3 mg, crude) in THF (0.30 mL), *tert*-butanol (0.58 mL) and 2-methyl-2-butene (0.21 mL) was added at rt an aqueous solution of  $\text{NaClO}_2$  (56.6 mg, 0.63 mmol, 13 equiv) and  $\text{NaH}_2\text{PO}_4$  monohydrate (86.4 mg, 0.63 mmol, 13 equiv) in water (0.39 mL). After stirring the yellow reaction mixture for 2 h at rt, sat. aq.  $\text{NaH}_2\text{PO}_4$  (4 mL) was added and the biphasic mixture was stirred for 15 min. EtOAc (10 mL) and brine (5 mL) was added and the layers were separated. The aqueous layer was extracted with EtOAc (3 x 15 mL). The combined organic extracts were dried over  $\text{MgSO}_4$ , filtered and the solvent was removed under reduced pressure to afford the acid (32.5 mg, crude) as a yellow oil, which was used for the next step without further purification.

To a solution of the crude acid (32.5 mg, crude) in toluene (0.30 mL) and MeOH (0.20 mL) was added at  $0^\circ\text{C}$   $\text{TMSCHN}_2$  (37.0  $\mu\text{L}$ , 74  $\mu\text{mol}$ , 1.5 equiv, 2.0 M solution in hexane). After stirring for 30 min at  $0^\circ\text{C}$ , the reaction mixture was quenched slowly by the dropwise addition of an AcOH/MeOH solution (10:1), until the yellow color disappeared. The solvent was removed under reduced pressure. The residue was purified by column chromatography (hexane/EtOAc, 15:1  $\rightarrow$  10:1) to afford **93** (23.0 mg, 79% over 3 steps) as a colorless oil.

**R<sub>f</sub>** = 0.59 (hexane/EtOAc, 5:1)

**[α]<sub>D</sub><sup>24</sup>** = +19.2° [*c* = 0.520, CHCl<sub>3</sub>]

**<sup>1</sup>H-NMR** (400.1 MHz, CDCl<sub>3</sub>): δ = 7.70-7.63 (m, 4H), 7.46-7.32 (m, 6H), 7.24 (d, *J* = 8.7 Hz, 2H), 6.83 (d, *J* = 8.7 Hz, 2H), 5.84 (m<sub>c</sub>, 1H), 5.07-4.96 (m, 2H), 4.49 (d, *J* = 10.9 Hz, 1H), 4.36 (d, *J* = 10.9 Hz, 1H), 3.78 (s, 3H), 3.67 (m<sub>c</sub>, 2H), 3.61 (s, 3H), 3.31 (td, *J* = 4.8, 7.4 Hz, 1H), 2.50 (m<sub>c</sub>, 1H), 2.36-2.27 (m, 2H), 2.22 (m<sub>c</sub>, 1H), 1.74-1.60 (m, 1H), 1.59-1.47 (m, 1H), 1.47-1.38 (m, 2H), 1.04 (s, 9H), 0.99 (d, *J* = 6.9 Hz, 3H).

**<sup>13</sup>C-NMR** (100.6 MHz, CDCl<sub>3</sub>): δ = 173.4, 159.0, 140.6, 135.6, 133.9, 130.9, 129.6, 129.3, 127.6, 114.5, 113.7, 80.7, 71.0, 61.7, 55.2, 51.3, 40.3, 39.4, 36.3, 35.8, 29.4, 26.8, 19.1, 15.1.

**IR** (neat, ν/cm<sup>-1</sup>): 3072w, 2932m, 2857m, 1737s, 1613w, 1513s, 1463w, 1429m, 1248s, 1171m, 1110s, 1091s, 822m, 739m, 703s, 614w, 506m.

**HRMS (ESI)**: *m/z* calcd for C<sub>36</sub>H<sub>48</sub>NaO<sub>5</sub>Si [M + Na]<sup>+</sup>: 611.3163, found: 611.3163.

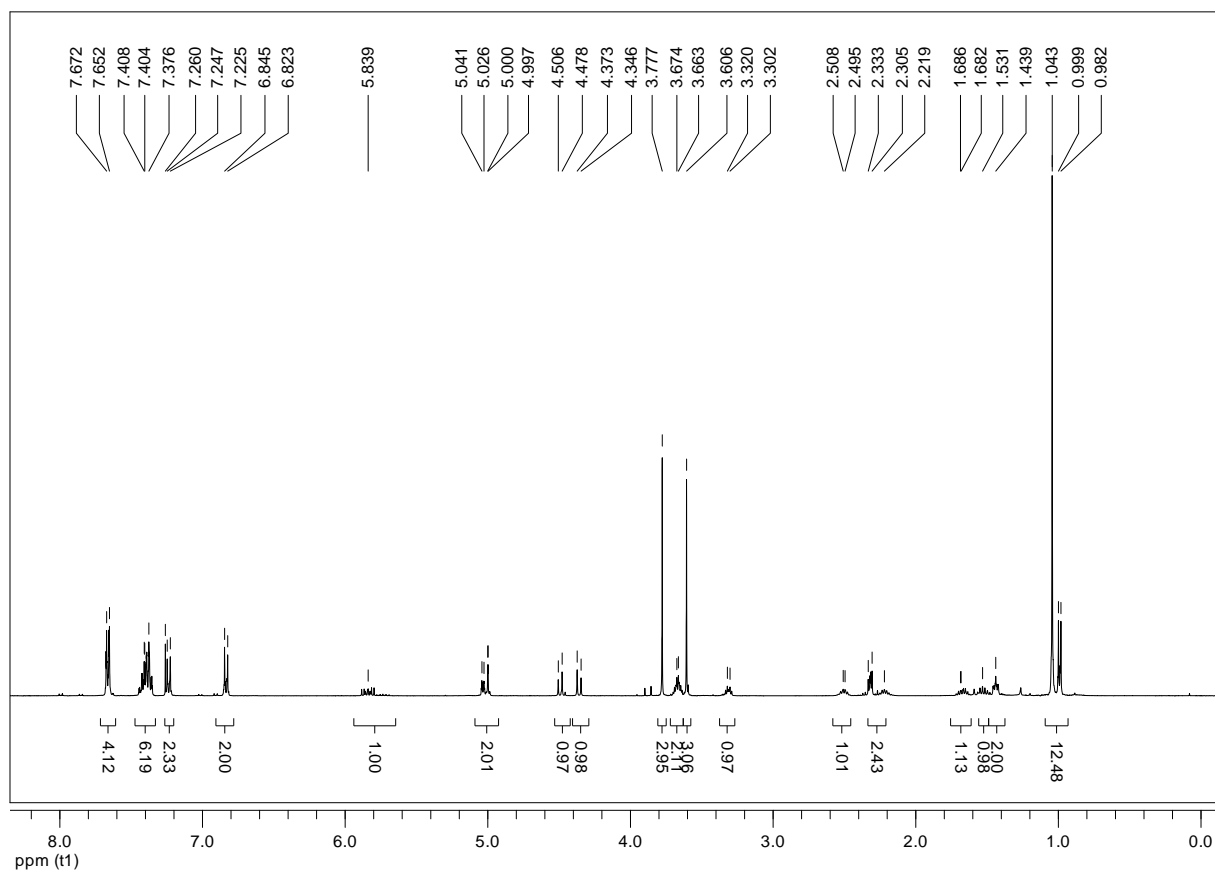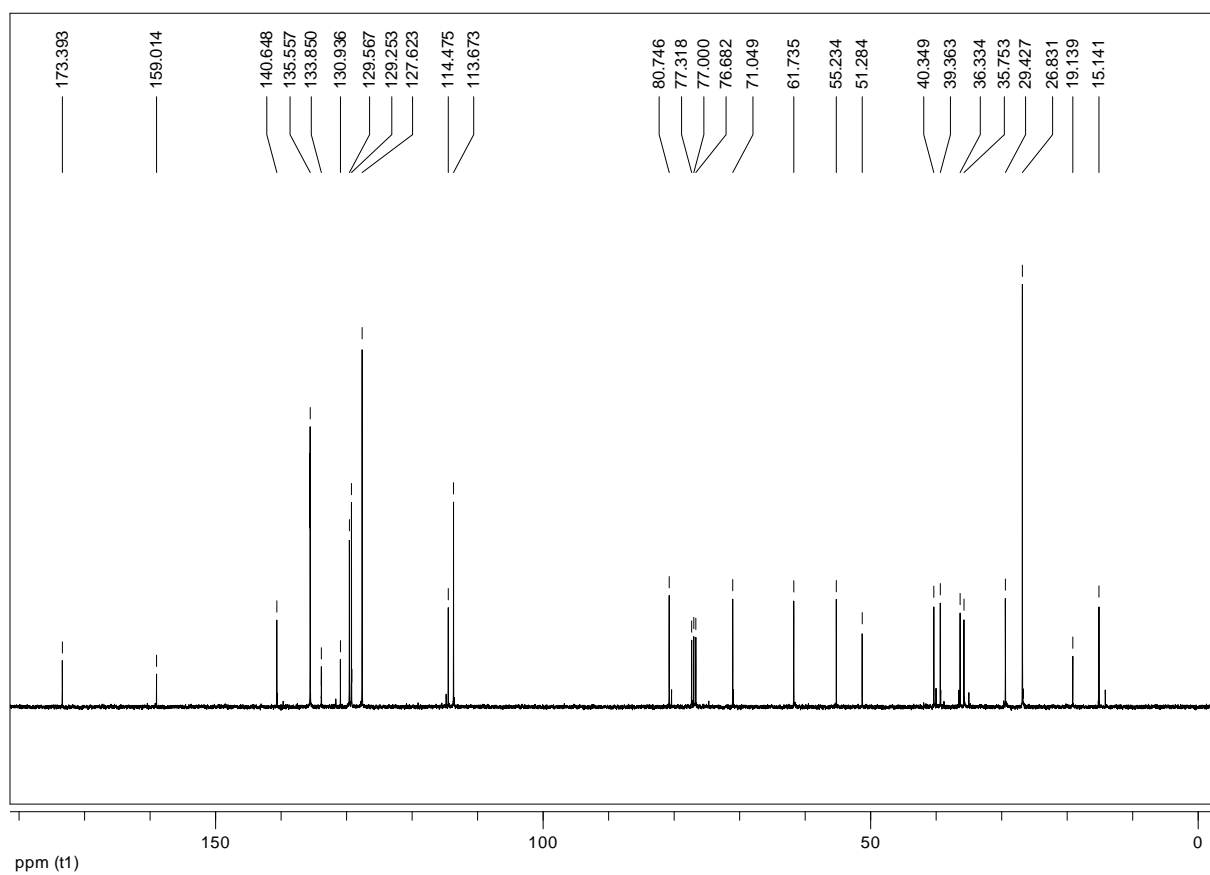

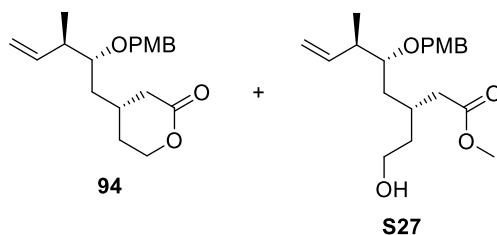

**(R)-4-((2R,3R)-2-((4-Methoxybenzyl)oxy)-3-methylpent-4-en-1-yl)tetrahydro-2H-pyran-2-one (94):** To a solution of **93** (23.0 mg, 39.1  $\mu$ mol, 1.0 equiv) in THF (0.39 mL) was added at rt AcOH (11.5  $\mu$ L, 0.20 mol, 5.1 equiv) and TBAF (0.20 mL, 0.20 mmol, 5.1 equiv, 1.0 M in THF). After stirring the reaction mixture for 20 h at rt, sat.  $\text{NH}_4\text{Cl}$  (15 mL) and EtOAc (15 mL) were added. The layers were separated and the aqueous layer was extracted with EtOAc (3 x 10 mL). The combined organic extracts were washed with brine, dried over  $\text{MgSO}_4$  and the solvent was removed under reduced pressure. The residue was purified by column chromatography (hexane/EtOAc, 2:1) to give a separable mixture<sup>20</sup> of **94/S27** (11.0 mg, 88%, 9:1) as a colorless oil.

Lactone **94**:<sup>21</sup>

$R_f$  = 0.33 (hexane/EtOAc, 2:1)

$[\alpha]_D^{24}$  = +53.9° [ $c$  = 0.330,  $\text{CHCl}_3$ ]

**$^1\text{H-NMR}$**  (400.1 MHz,  $\text{CDCl}_3$ ):  $\delta$  = 7.24 (d,  $J$  = 8.6 Hz, 2H), 6.88 (d,  $J$  = 8.7 Hz, 2H), 5.86 (ddd,  $J$  = 7.0, 10.7, 17.3 Hz, 1H), 5.13-5.02 (m, 2H), 4.59 (d,  $J$  = 11.3 Hz, 1H), 4.34 (d,  $J$  = 11.3 Hz, 1H), 4.33-4.26 (m, 1H), 4.07 (dt,  $J$  = 3.7, 11.0 Hz, 1H), 3.80 (s, 3H), 3.33 (ddd,  $J$  = 2.8, 4.8, 9.8 Hz, 1H), 2.70-2.54 (m, 2H), 2.17-2.02 (m, 2H), 1.74-1.62 (m, 1H), 1.53-1.42 (m, 1H), 1.40-1.20 (m, 2H), 1.03 (d,  $J$  = 6.9 Hz, 3H).

**$^{13}\text{C-NMR}$**  (100.6 MHz,  $\text{CDCl}_3$ ):  $\delta$  = 171.2, 159.3, 139.7, 130.4, 129.7, 115.1, 113.8, 78.8, 70.9, 68.4, 55.3, 39.7, 37.2, 37.1, 28.3, 28.1, 15.4.

**IR** (neat,  $\text{v}/\text{cm}^{-1}$ ): 3079w, 2961m, 2932m, 1736s, 1612m, 1513s, 1463w, 1401w, 1248s, 1219m, 1173m, 1086m, 1068m, 1034m, 916w, 821m, 771m.

**HRMS (ESI)**:  $m/z$  calcd for  $\text{C}_{19}\text{H}_{26}\text{NaO}_4$  [ $\text{M} + \text{Na}$ ]<sup>+</sup>: 341.1723, found: 341.1725.

Hydroxy methylester **S27**:

$R_f$  = 0.21 (hexane/EtOAc, 2:1).

<sup>20</sup> All fractions containing **94** and **S27** were combined.

<sup>21</sup> Pure Lactone **94** was obtained by treatment of **S27** with PPTS (15 mol%) in MeOH at rt for 16 h (73% yield).

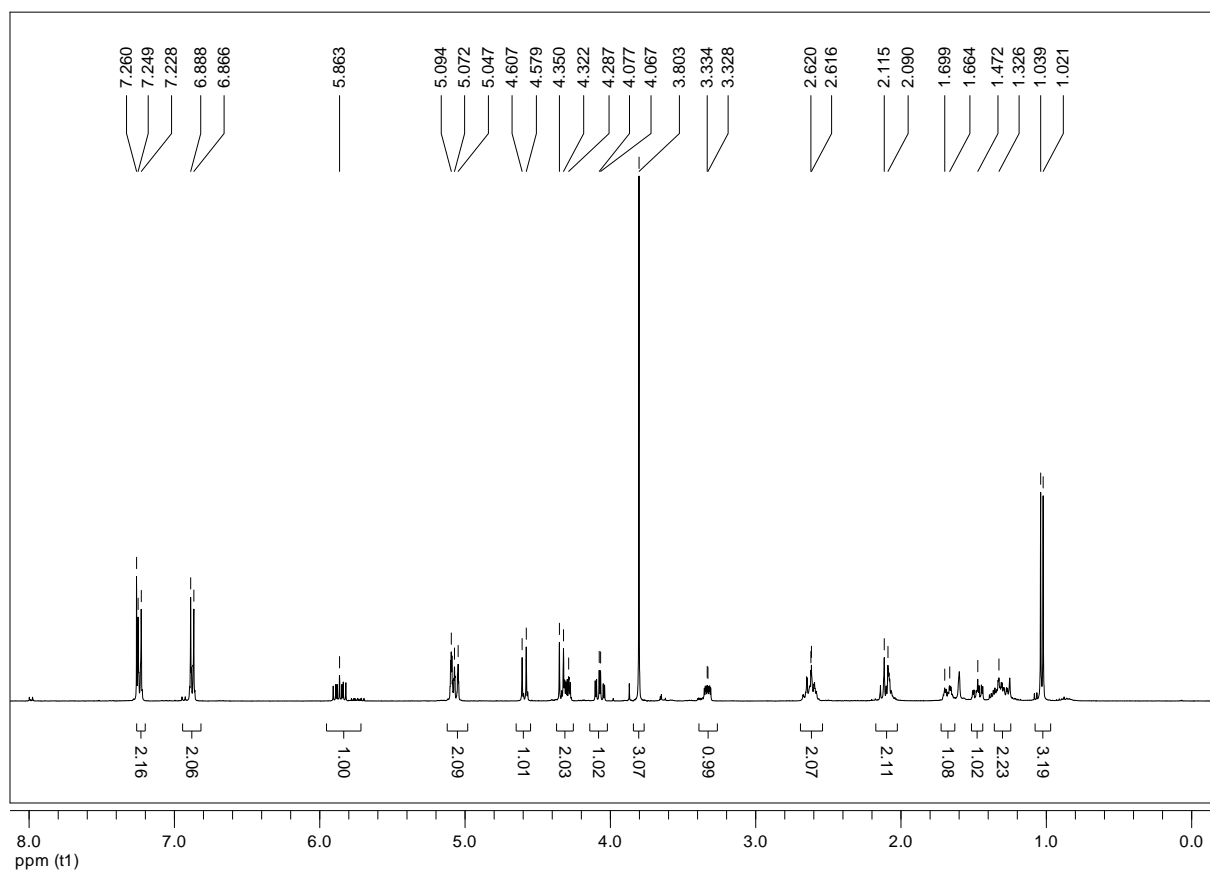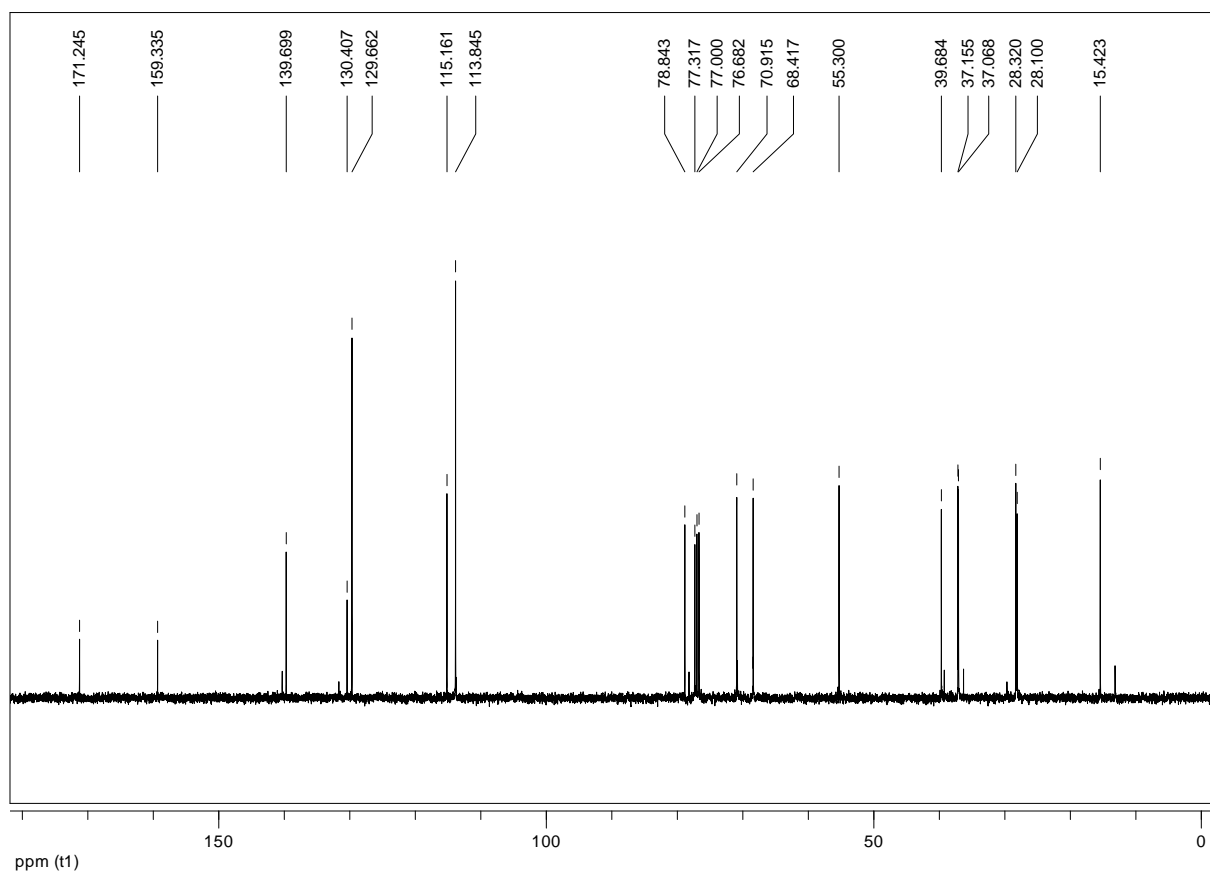

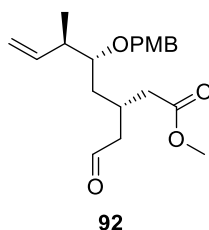

**Methyl (3*S*,5*R*,6*R*)-5-((4-methoxybenzyl)oxy)-6-methyl-3-(2-oxoethyl)oct-7-**

**enoate (95):** To a solution of **94** (6.6 mg, 20.7  $\mu$ mol, 1.0 equiv) in MeOH (0.9 mL) was added at rt a freshly prepared solution of LiOMe in MeOH (1.36 mL, 30.2  $\mu$ mol, 1.5 equiv) (prepared by addition of *n*-BuLi (50  $\mu$ L, 0.10 mmol) to MeOH (4.5 mL) at 0 °C  $\rightarrow$  22.2  $\mu$ m). After stirring for 1 h at rt, the reaction mixture was quenched by simultaneous addition of Et<sub>2</sub>O (1.2 mL) and sat. NH<sub>4</sub>Cl (1.8 mL). All volatiles were removed under reduced pressure. The aqueous phase was extracted with Et<sub>2</sub>O (3 x 20 mL). The combined organic extracts were dried over MgSO<sub>4</sub> and the solvent was removed under reduced pressure. The crude hydroxyester **S27** (along with some remaining lactone **94**) was used for the next step without further purification due to danger of lactonization.

To a solution of the crude hydroxyester **S27** (8.0 mg) was added solid sodium bicarbonate (7.8 mg, 4.5 equiv) followed by CH<sub>2</sub>Cl<sub>2</sub> (6.8 mL). After cooling to 0 °C, *Dess-Martin* periodinane (11.4 mg, 26.9  $\mu$ mol, 1.3 equiv) was added in one portion. After stirring for 1 h at rt, sat. Na<sub>2</sub>S<sub>2</sub>O<sub>3</sub> (3 mL) and sat. NaHCO<sub>3</sub> (3 mL) were added simultaneously. This biphasic mixture was diluted with Et<sub>2</sub>O (20 mL) and brine. The layers were separated and the aqueous layer was extracted with Et<sub>2</sub>O (2 x 10 mL). The combined organic extracts were dried over MgSO<sub>4</sub>, filtered and concentrated under reduced pressure. The residue was purified by column chromatography (hexane/EtOAc, 2:1) to afford **95** (4.9 mg, 68%, 93% brsm) as a colorless oil. In addition, the starting material **94** (1.8 mg, 27%) was recovered.

**R<sub>f</sub>** = 0.62 (hexane/EtOAc, 5:1)

**[ $\alpha$ ]<sub>D</sub><sup>24</sup>** = +40.1° [*c* = 0.245, CHCl<sub>3</sub>]

**<sup>1</sup>H-NMR** (400.1 MHz, CDCl<sub>3</sub>):  $\delta$  = 9.62 (t, *J* = 1.8 Hz, 1H), 7.26 (d, *J* = 8.6 Hz, 2H), 6.87 (d, *J* = 8.7 Hz, 2H), 5.86 (mc, 1H), 5.09-5.06 (m, 1H), 5.06-5.02 (m, 1H), 4.56 (d, *J* = 11.0 Hz, 1H), 4.34 (d, *J* = 11.0 Hz, 1H), 3.80 (s, 3H), 3.63 (s, 3H), 3.32 (ddd, *J* = 3.6, 4.9, 8.7 Hz, 1H), 2.59 (mc, 2H), 2.47-2.35 (m, 3H), 2.31 (dd, *J* = 7.6, 15.6 Hz, 1H), 1.57-1.40 (m, 2H), 1.02 (d, *J* = 6.9 Hz, 3H).

**<sup>13</sup>C-NMR** (100.6 MHz, CDCl<sub>3</sub>): δ = 201.8, 172.8, 159.2, 139.9, 130.5, 129.5, 114.9, 113.8, 79.9, 70.5, 55.3, 51.5, 47.6, 39.6, 39.1, 35.0, 27.1, 15.3.

**IR** (neat, ν/cm<sup>-1</sup>): 2952m, 2935m, 1732s, 1612m, 1512s, 1462w, 1438m, 1373w, 1302m, 1249s, 1172m, 1065w, 1034m, 917w, 821m.

**HRMS (ESI)**: *m/z* calcd for C<sub>19</sub>H<sub>26</sub>NaO<sub>4</sub> [M + Na]<sup>+</sup>: 341.1723, found: 341.1725.



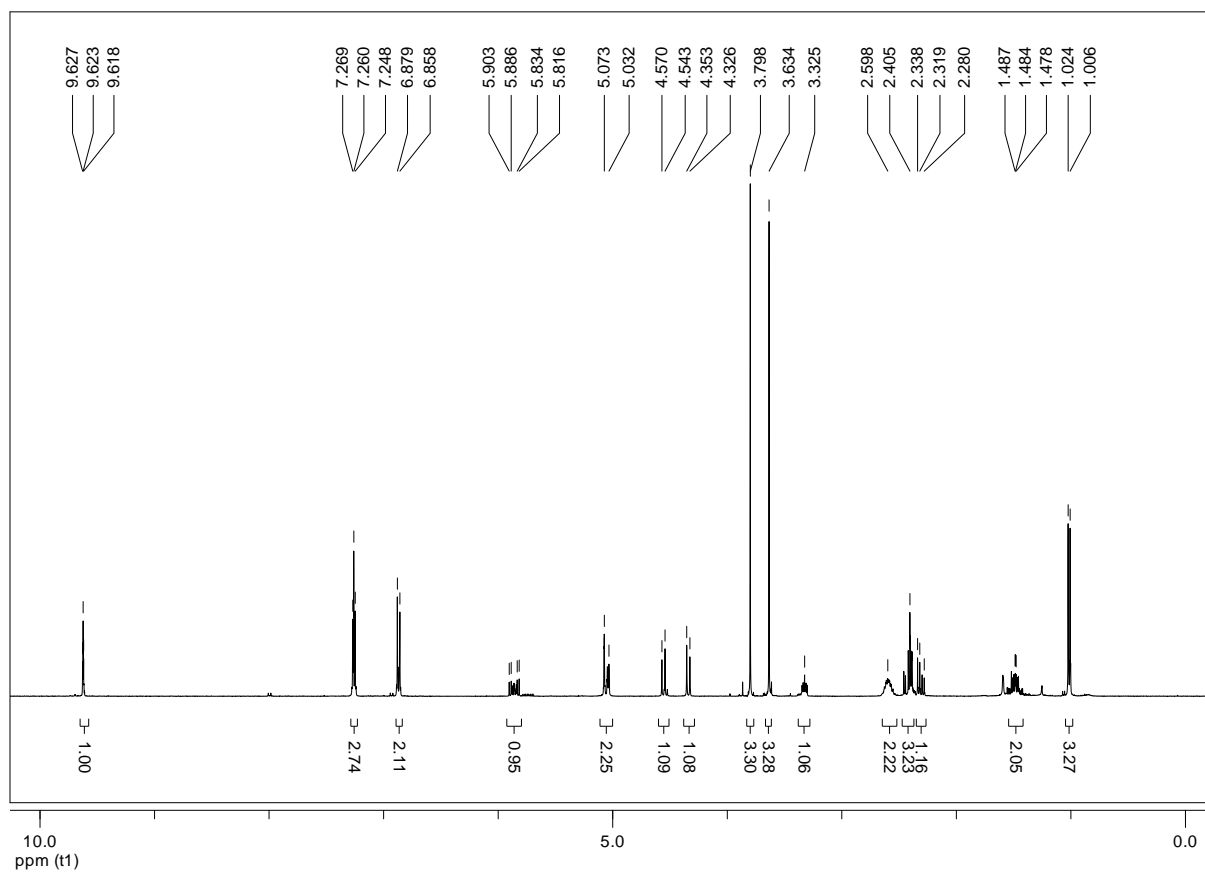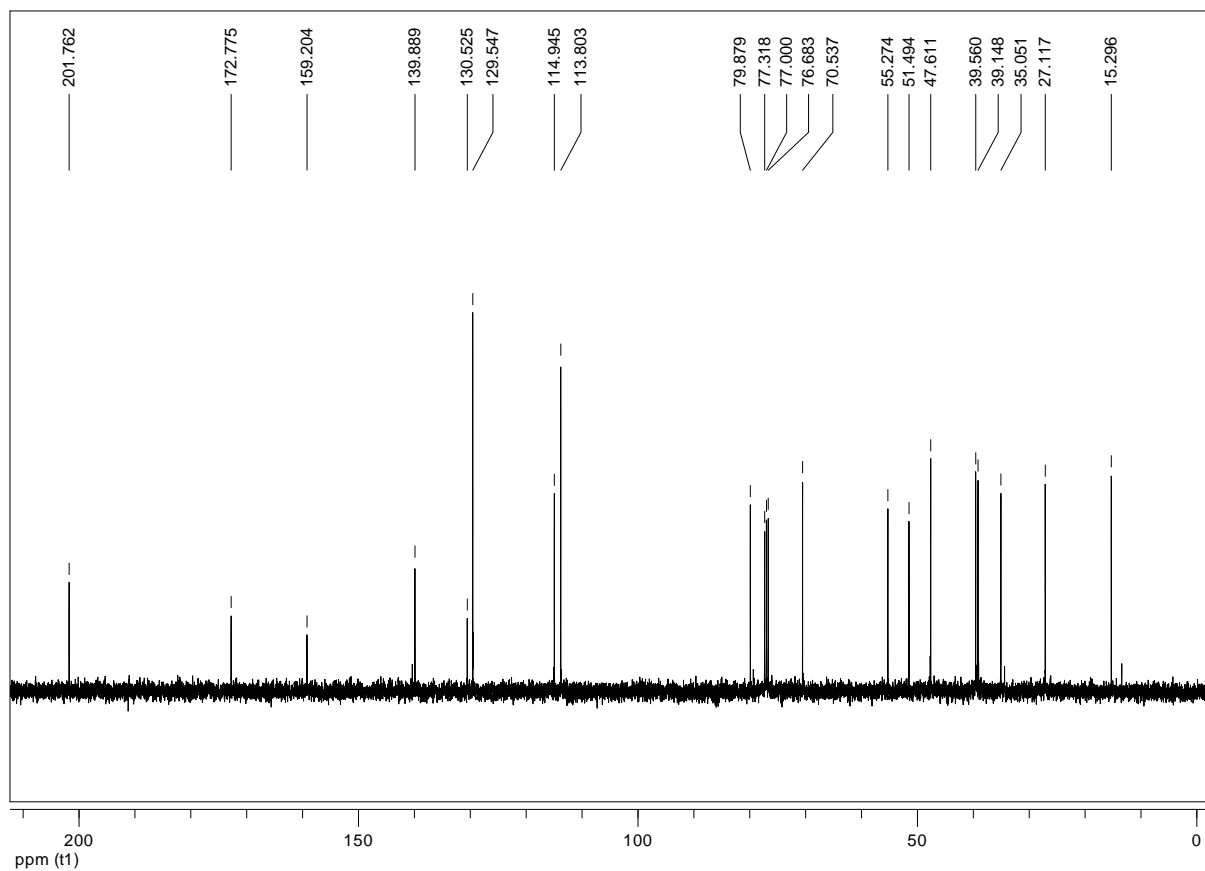

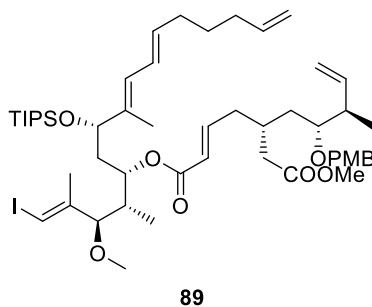

**1-((1*E*,3*R*,4*S*,5*S*,7*S*,8*E*,10*E*)-1-Iodo-3-methoxy-2,4,8-trimethyl-7-((triisopropylsilyl)oxy)hexadeca-1,8,10,15-tetraen-5-yl) 7-methyl (*R,E*)-5-((2*R*,3*R*)-2-((4-methoxybenzyl)oxy)-3-methylpent-4-en-1-yl)hept-2-enedioate (**89**):** To a mixture of LiCl (0.9 mg, 21.2  $\mu$ mol, 1.35 equiv) and **S18** (12.3 mg, 15.7  $\mu$ mol, 1.0 equiv) was added at rt a stock solution of DBU (2.63  $\mu$ L, 17.4  $\mu$ mol, 1.10 equiv) in MeCN (0.3 mL, 57.5 mm). After stirring the reaction mixture for 15 min at rt, a solution of **95** (6.7 mg, 19.2  $\mu$ mol, 1.22 equiv) in THF (0.9 mL) was added dropwise at 0 °C. After stirring for 2 h at rt, more LiCl (1.0 mg, 23.6  $\mu$ mol, 1.5 equiv) and DBU solution (0.21 mL, 57.5 mm in MeCN, 12.1  $\mu$ mol, 0.77 equiv) were added. Stirring was continued for 1 h until TLC indicated complete conversion of the phosphonate. The yellowish reaction mixture was concentrated under reduced pressure and the residue was purified by column chromatography (hexane/EtOAc, 7:1) to give **89** (12.3 mg, 78%) as a colorless oil.

$R_f$  = 0.37 (hexane/EtOAc, 7:1).

$[\alpha]_D^{24} = +32.3^\circ$  [ $c$  = 0.615, CHCl<sub>3</sub>].

**<sup>1</sup>H-NMR** (400.1 MHz, CDCl<sub>3</sub>):  $\delta$  = 7.26 (d,  $J$  = 8.7 Hz, 2H), 6.87 (d,  $J$  = 8.7 Hz, 2H), 6.74 (mc, 1H), 6.16 (s, 1H), 6.11 (dd,  $J$  = 10.8, 15.0 Hz, 1H), 5.92-5.74 (m, 3H), 5.70 (d,  $J$  = 15.5 Hz, 1H), 5.59 (mc, 1H), 5.09-4.91 (m, 4H), 4.77 (ddd,  $J$  = 1.6, 4.0, 9.8 Hz, 1H), 4.56 (d,  $J$  = 11.0 Hz, 1H), 4.37 (d,  $J$  = 11.0 Hz, 1H), 4.11 (t,  $J$  = 6.6 Hz, 1H), 3.80 (s, 3H), 3.63 (s, 3H), 3.45-3.31 (m, 2H), 3.16 (s, 3H), 2.57 (mc, 1H), 2.34-2.17 (m, 4H), 2.17-1.98 (m, 6H), 1.85-1.74 (m, 1H), 1.83 (d,  $J$  = 0.9 Hz, 3H), 1.73-1.63 (m, 1H), 1.67 (s, 3H), 1.53-1.34 (m, 4H), 1.07-0.96 (m, 24H), 0.90 (d,  $J$  = 6.9 Hz, 3H).

**<sup>13</sup>C-NMR** (100.6 MHz, CDCl<sub>3</sub>):  $\delta$  = 172.9, 165.3, 159.1, 146.5, 145.8, 140.1, 138.7, 137.2, 134.1, 130.6, 129.4, 126.2, 125.9, 123.9, 114.8, 114.6, 113.8, 87.6, 80.0, 78.9, 76.5, 72.3, 70.7, 56.7, 55.3, 51.4, 39.9, 39.8, 38.7, 35.9, 35.8, 34.9, 33.2, 32.4, 31.4, 28.6, 19.7, 18.2, 18.1, 15.3, 12.5, 11.5, 9.7.

**IR** (neat,  $\nu/\text{cm}^{-1}$ ): 2940s, 2866m, 1738s, 1718s, 1653w, 1613w, 1513m, 1462m, 1379w, 1249s, 1172m, 1088s, 1058m, 1011w, 965w, 913m, 883m, 683m.

**HRMS (ESI):**  $m/z$  calcd for  $C_{51}H_{85}INO_8Si$   $[M + NH_4]^+$ : 994.5084, found: 994.5097.

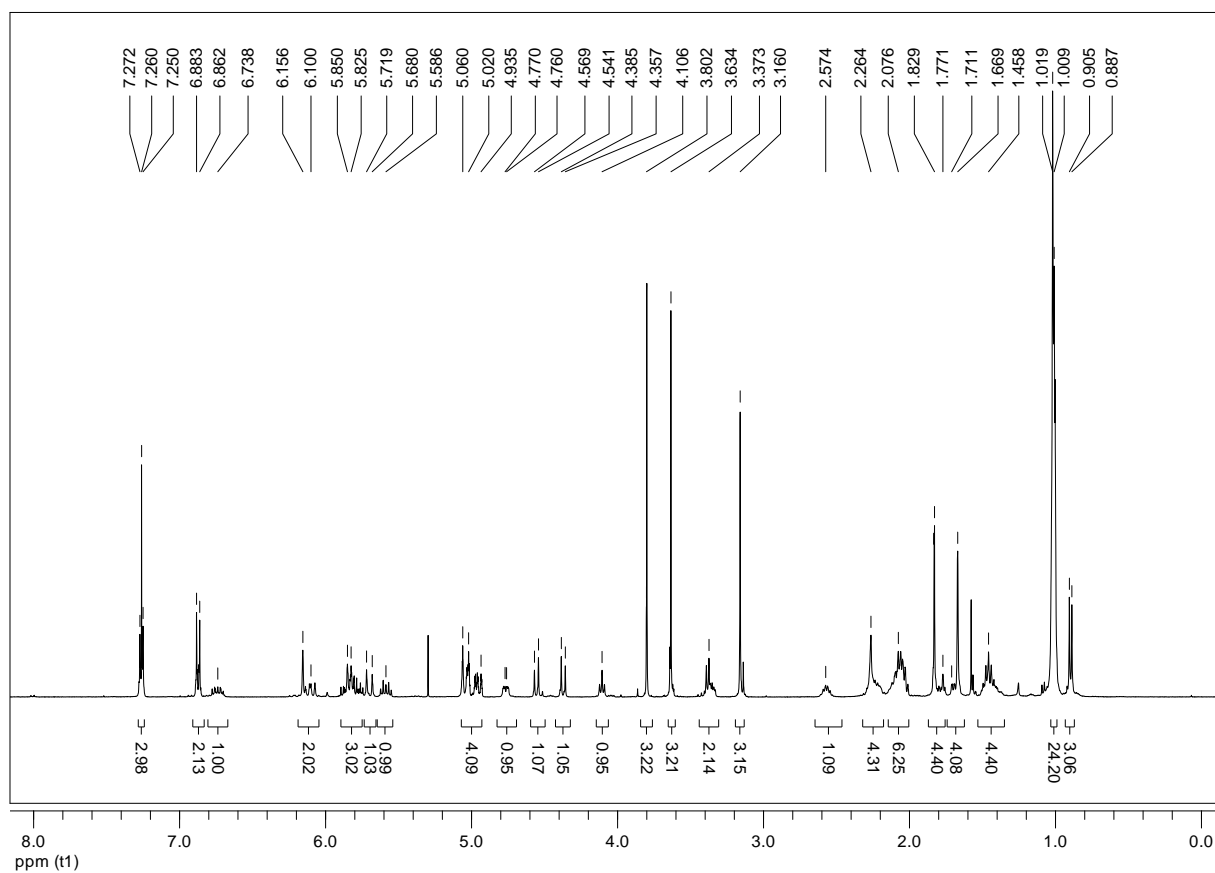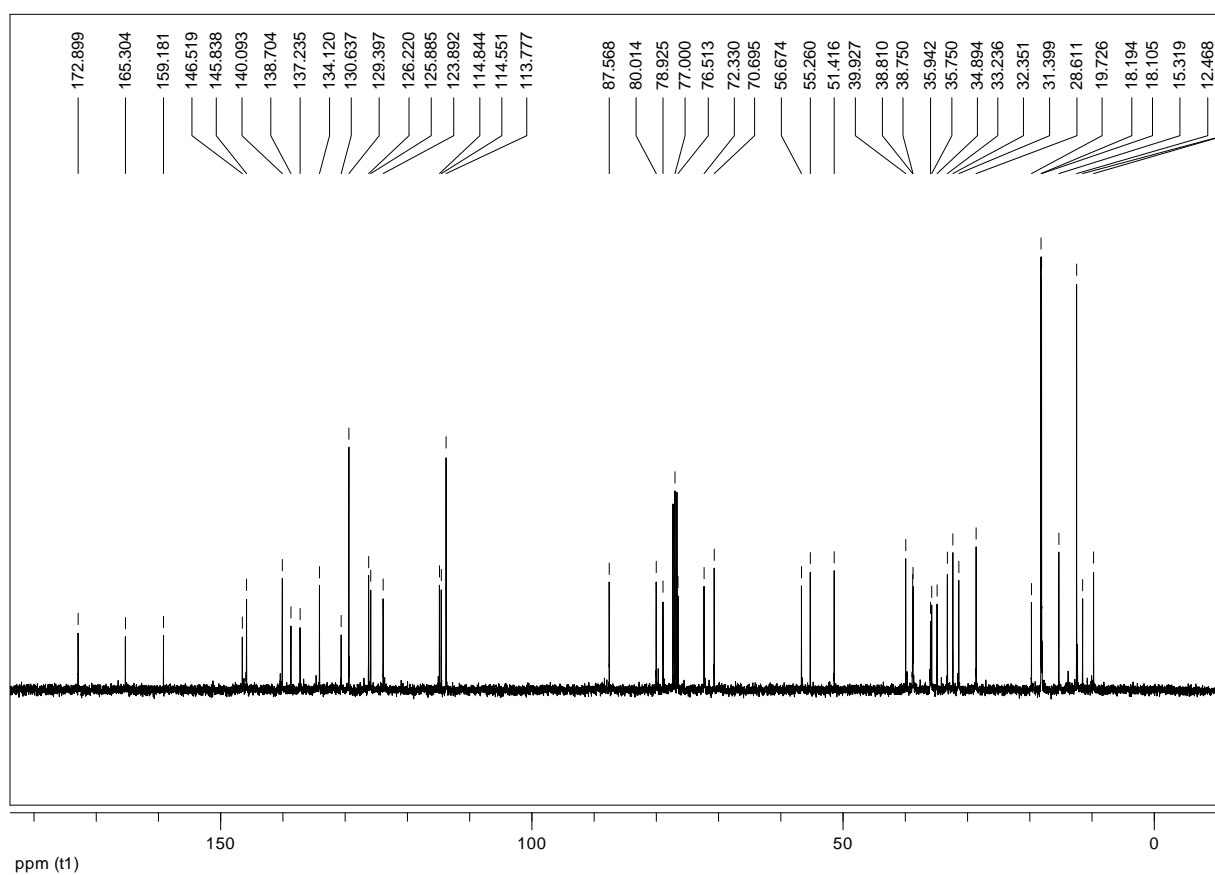

**Methyl (*E*)-2-methylhex-2-en-4-ynoate (**97**):**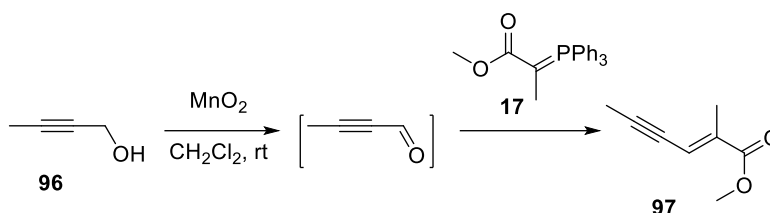

**Oxidation:** To a solution of 2-butyn-1-ol (**96**) (3.89 mL, 51.6 mmol, 1.20 eq) in  $\text{CH}_2\text{Cl}_2$  (160 mL) were added molecular sieves (3 Å, beads) and activated  $\text{MnO}_2$  (89.8 g, 1.03 mol, 24.0 eq) at 0 °C. The cooling bath was removed and the suspension was stirred for 1.5 h at rt.

**Wittig reaction:** A solution of ylide **17** (15.0 g, 43.1 mmol, 1.00 eq) was added at rt to the black suspension obtained in the oxidation. Then the mixture was heated to reflux (50 °C oil bath) for 1 h 45 min and then filtered through a pad of celite (topped with a few mm of silica). The pad was rinsed thoroughly with ether, the combined filtrates were concentrated under reduced pressure and the residue was purified by column chromatography (pent/ $\text{Et}_2\text{O}$  15:1→10:1→5:1) to afford ester **97** as a colourless liquid (2.71 g, 45%).

**TLC** (hexane/ $\text{EtOAc}$ , 5:1):  $R_f$  = 0.52

**$^1\text{H-NMR}$**  ( $\text{CDCl}_3$ , 400.1 MHz):  $\delta$  = 6.60 (mc, 1H), 3.75 (s, 3H), 2.07 (mc, 3H), 2.03 (dd,  $J$  = 0.6 Hz,  $J$  = 1.2 Hz, 3H)

**$^{13}\text{C-NMR}$**  ( $\text{CDCl}_3$ , 100.6 MHz):  $\delta$  = 167.8, 137.6, 120.5, 99.2, 76.6, 52.0, 15.1, 4.9.

**IR** (neat,  $\text{v}/\text{cm}^{-1}$ ) 2994, 2952, 2920, 2849, 2367, 2357, 2221, 1712 (s), 1618, 1435, 1386, 1348, 1337, 1256 (s), 1191, 1175, 1118 (s), 1017, 974, 944, 891, 827, 802, 745 (s), 690, 512, 481, 439, 425, 409.

**HRMS (EI):**  $m/z$  calcd for  $\text{C}_8\text{H}_{10}\text{O}_2$   $[\text{M}]^+$ : 138.0676; found: 138.0676.

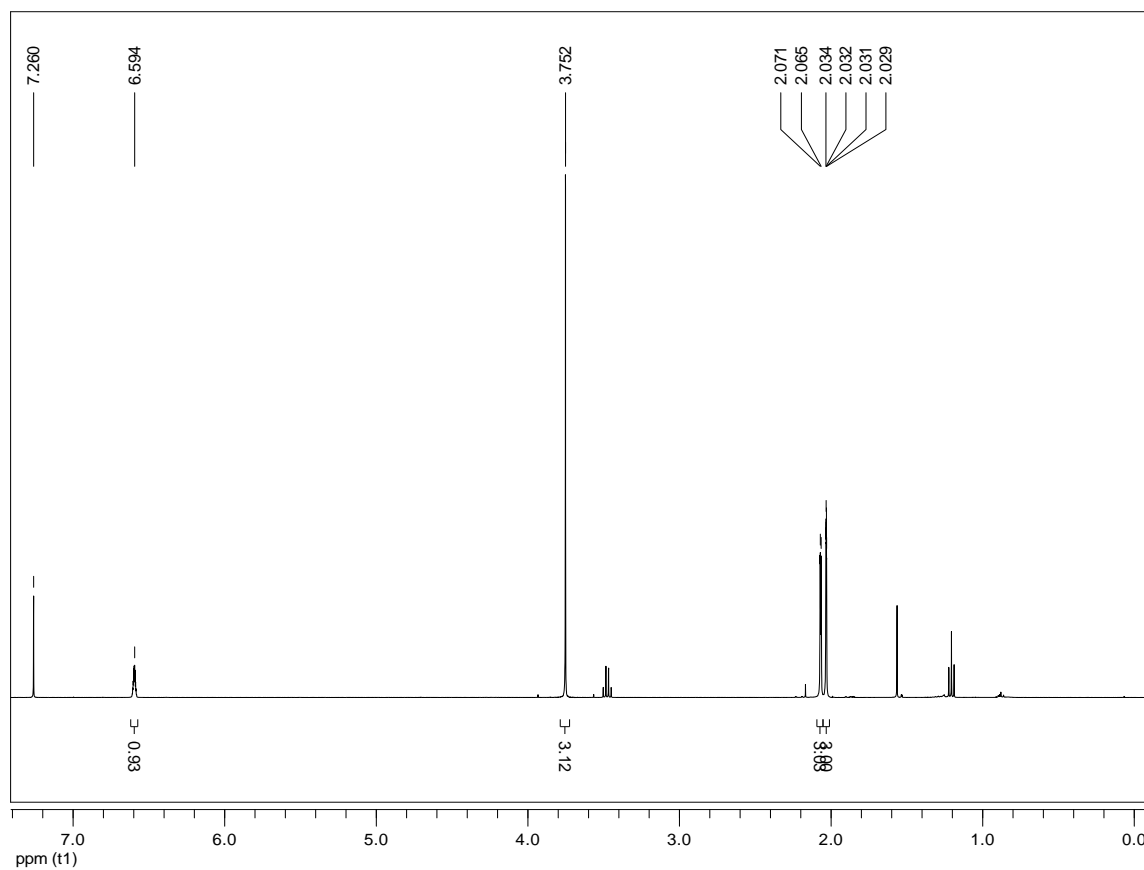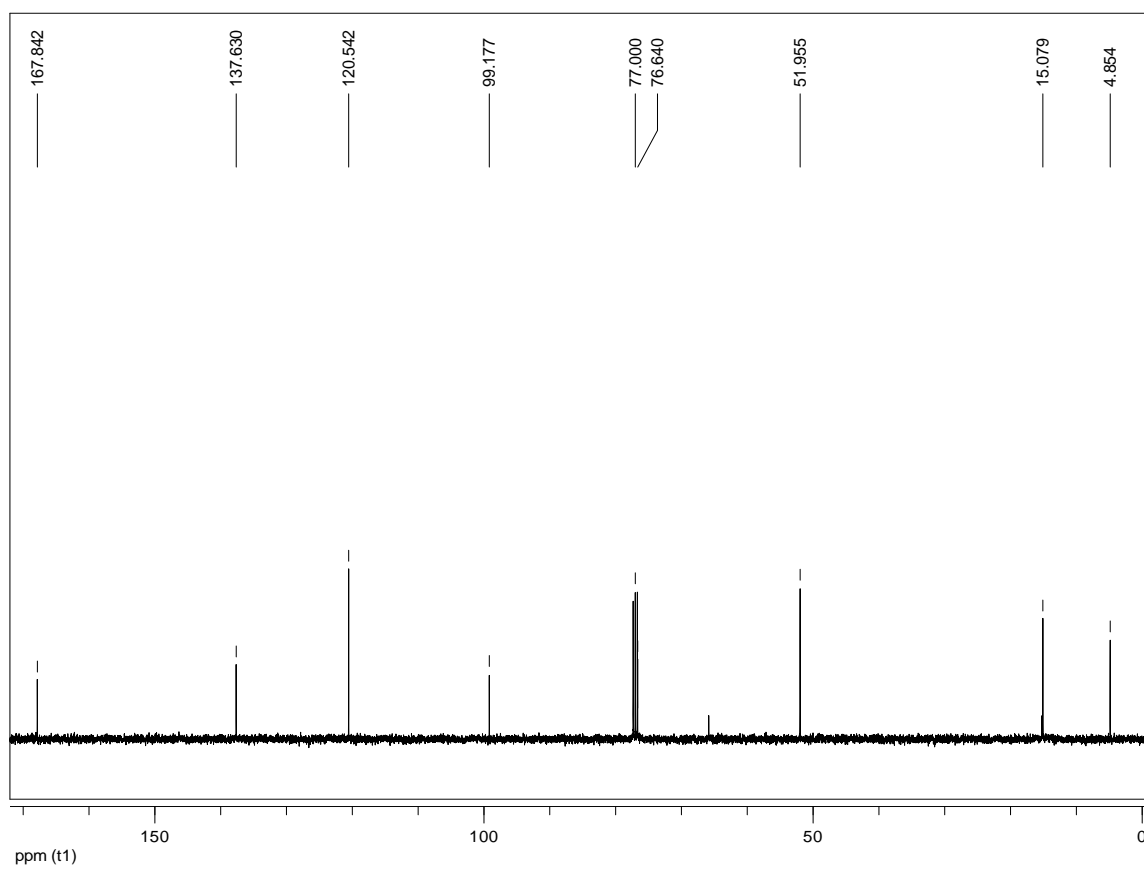

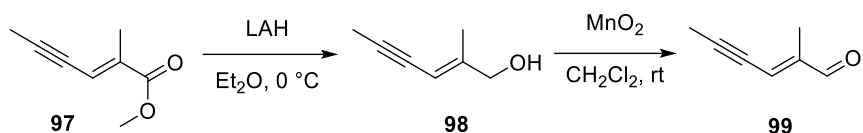

**(*E*)-2-methylhex-2-en-4-ynal (99):**

**Reduction:** To a solution of ester **97** (2.71 g, 19.6 mmol, 1.00 eq) in ether (230 mL) was added  $\text{LiAlH}_4$  (774 mg, 20.4 mmol, 1.04 eq) in small portions at 0 °C. The suspension was stirred at the same temperature for 30 min and the reaction was then quenched by successive addition of  $\text{H}_2\text{O}$  (30 mL), 10% aq NaOH (30 mL),  $\text{H}_2\text{O}$  (90 mL). The layers were separated and the aqueous phase was extracted with ether (3×50 mL). The combined organic layers were washed with brine, dried over  $\text{MgSO}_4$  and concentrated under reduced pressure. The crude allylic alcohol **98** thus obtained was used for the next step without purification.

**Oxidation:** To a solution of the crude allylic alcohol **98** (ca. 2.16 g, 19.6 mmol, 1.00 eq) in  $\text{CH}_2\text{Cl}_2$  (68 mL) were added molecular sieves (3 Å, beads) and activated  $\text{MnO}_2$  (34.1 g, 392 mmol, 20.0 eq) at rt. The suspension was stirred for 10 min at the same temperature and then filtered through a pad of Celite, topped with a few mm of silica. The filter was washed thoroughly with  $\text{Et}_2\text{O}$ , the combined filtrates were concentrated under reduced pressure and the residue was purified by column chromatography (Pent/ $\text{Et}_2\text{O}$  5:1) to afford aldehyde **99** (1.84 g 95% wt/wt along with  $\text{Et}_2\text{O}$ , 1.75 g, 82%) as a pale yellow liquid.

**TLC** (hexane/ $\text{EtOAc}$ , 5:1):  $R_f$  = 0.53

**$^1\text{H-NMR}$**  (400.1 MHz,  $\text{CDCl}_3$ ):  $\delta$  = 9.44 (s, 1H), 6.32 (mc, 1H), 2.14 (dd,  $J$  = 0.5 Hz,  $J$  = 2.4 Hz, 3H), 1.91 (dd,  $J$  = 0.5 Hz,  $J$  = 1.2 Hz, 3H).

**$^{13}\text{C}\{^1\text{H}\}\text{-NMR}$**  ( $\text{CDCl}_3$ , 100.6 MHz):  $\delta$  = 194.4, 147.7, 130.2, 105.1, 76.3, 11.5, 5.2.

**HRMS:**  $m/z$  calcd for  $\text{C}_7\text{H}_9\text{O}$   $[\text{M}+\text{H}]^+$ : 109.0648; found: 109.0653.

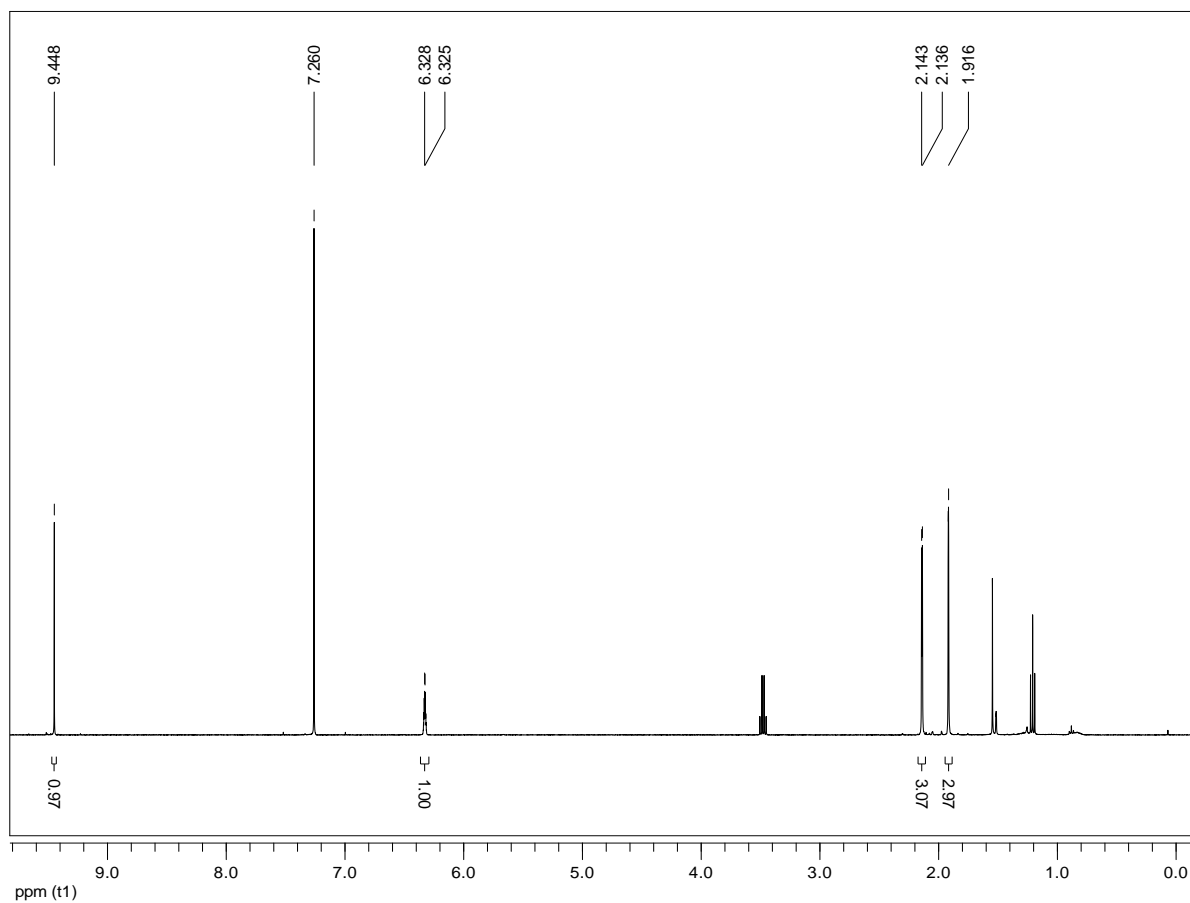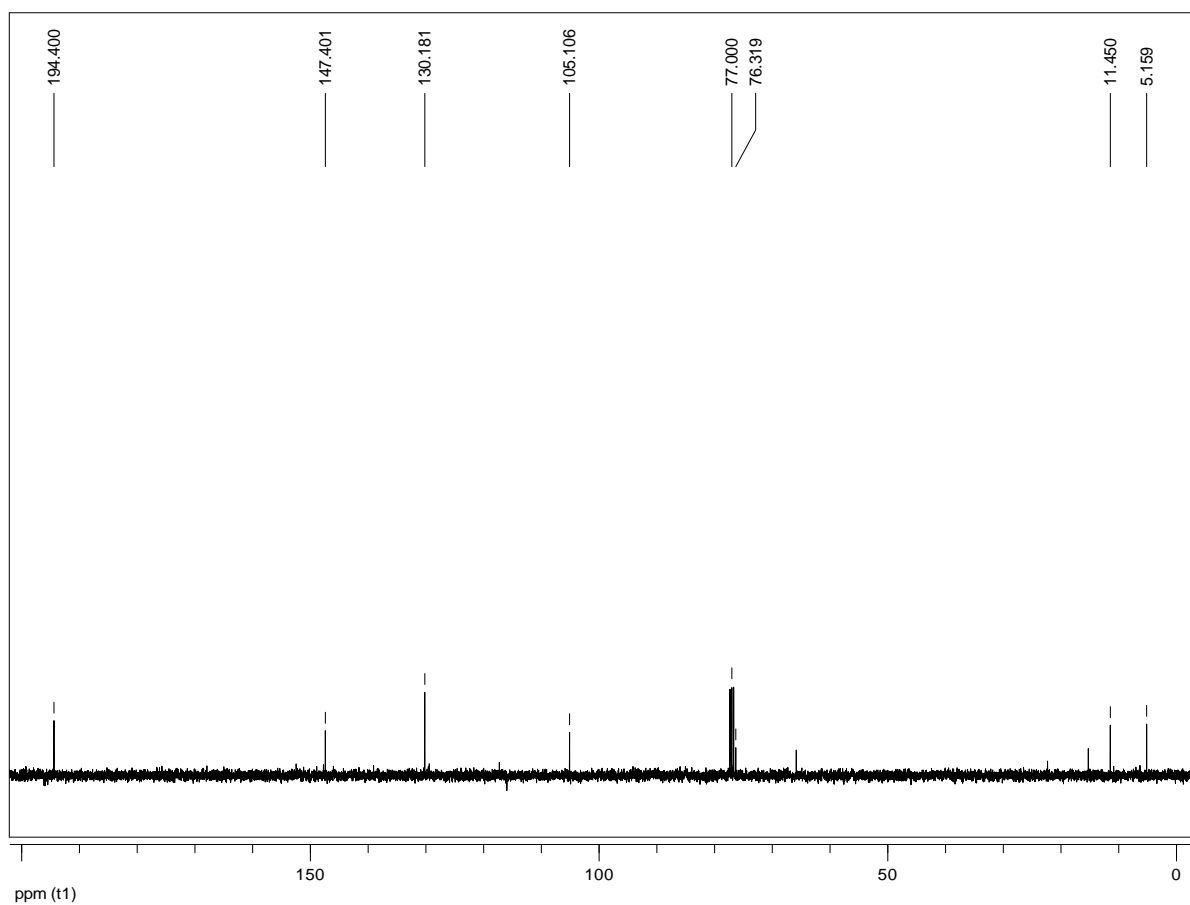

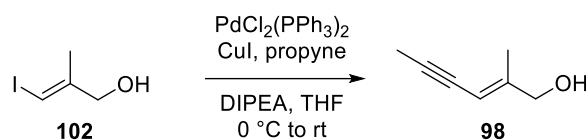

**(E)-2-Methylhex-2-en-4-yn-1-ol (98):** Propyne was condensed into a *Schlenk* tube at  $-78\text{ }^{\circ}\text{C}$ , then DIPEA (17.5 mL, 20 eq) and CuI (235 mg, 1.01 mmol, 20 mol%) were added. To this suspension was added a solution of the vinyl iodide **102** (1.00 g, 5.05 mmol, 1.00 eq) in THF (1 mL, rinsed with  $2\times 1\text{ mL}$ ), followed by THF (7 mL) and the  $\text{PdCl}_2(\text{PPh}_3)_2$  (532 mg, 0.758 mol, 15 mol%) at  $-78\text{ }^{\circ}\text{C}$ . After 15 min stirring at  $-78\text{ }^{\circ}\text{C}$ , the reaction was allowed to warm to rt and stirred overnight. Reaction control by HPLC indicated full conversion. The reaction was diluted with ether (20 mL) and washed with acetic acid (3 M, 35 mL). Then the layers were separated and the aqueous phase was extracted with ether ( $2\times 20\text{ mL}$ ). The combined organic extracts were washed with  $\text{NaHCO}_3$ , dried over  $\text{MgSO}_4$  and concentrated under reduced pressure. The crude was then purified by column chromatography (pent:Et<sub>2</sub>O 1:1) to afford the desired product **98** (662 mg) as an orange oil. This was further purified by Kugelrohr distillation ( $90\text{--}100\text{ }^{\circ}\text{C}$  at 15–8 mbar) to afford **98** as a yellow oil (350 mg, 63%).

**$^1\text{H-NMR}$**  ( $\text{CDCl}_3$ , 400.1 MHz):  $\delta$  = 5.51 (mc, 1H), 4.09 (bs, 2H), 1.99 (d,  $J$  = 2.0 Hz, 3H), 1.87 (bs, 3H).

**$^{13}\text{C-NMR}$**  ( $\text{CDCl}_3$ , 100.6 MHz):  $\delta$  = 148.2, 105.4, 89.7, 76.7, 67.0, 16.2, 4.4.



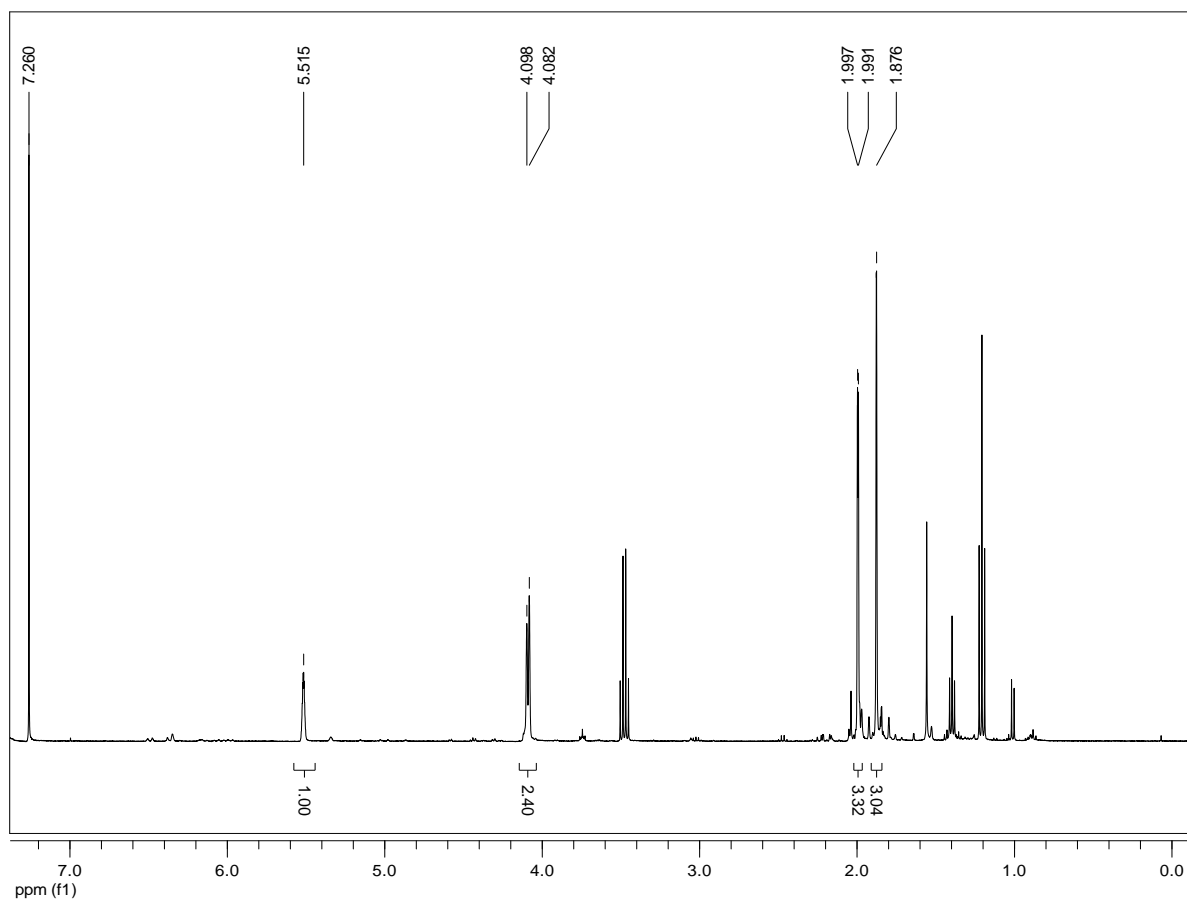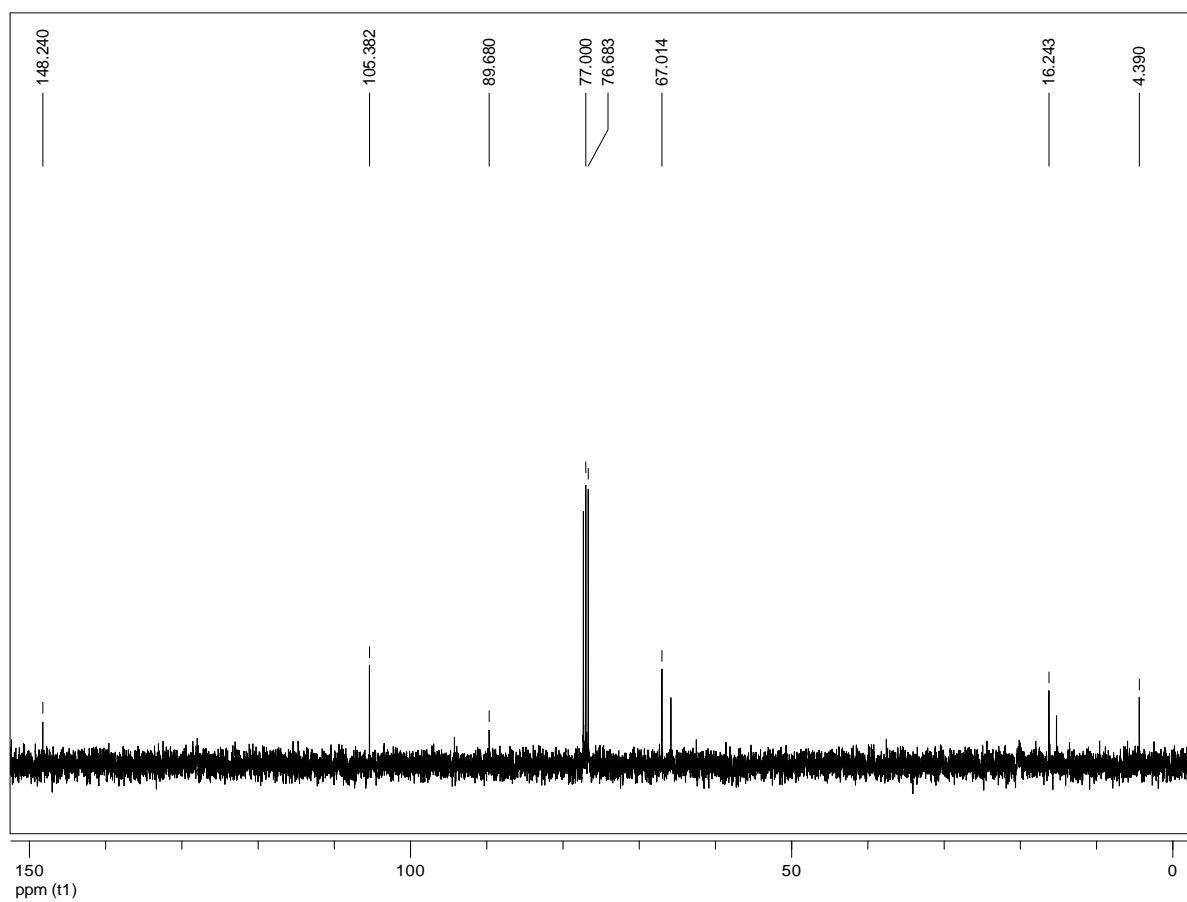

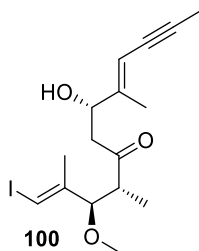

**(1*E*,3*R*,4*R*,7*S*,8*E*)-7-Hydroxy-1-iodo-3-methoxy-2,4,8-trimethyldodeca-1,8-dien-10-yn-5-one (**100**):** A solution of (+)-DIP-Cl (342 mg, 1.07 mmol, 2.00 eq) in CH<sub>2</sub>Cl<sub>2</sub> (0.4 mL) was cooled to  $-78^{\circ}\text{C}$ . Then NEt<sub>3</sub> was added (0.177 mL, 1.28 mmol, 2.40 eq), followed by a solution of ketone **27** (150 mg, 0.532 mmol, 1.00 eq) in CH<sub>2</sub>Cl<sub>2</sub> (0.2 mL, rinsed with 2×0.2 mL). After a few min a white precipitate formed, which rendered the mixture unstirrable. After 1.5 h the cooling bath was removed and, a few minutes later, replaced by an ice bath. This led to a thick suspension, which was easily stirrable. After 5 min at  $0^{\circ}\text{C}$ , the mixture was recooled to  $-78^{\circ}\text{C}$ . After a total of 3 h 30 min, a solution of aldehyde **99** (115 mg, 1.06 mmol, 2.00 eq) in CH<sub>2</sub>Cl<sub>2</sub> (0.2 mL, rinsed with 2×0.2 mL) was added. The orange mixture was stirred for another 50 min at  $-78^{\circ}\text{C}$ , and was then stored in a freezer ( $-18^{\circ}\text{C}$ ) for 17 h. The reaction was then quenched with pH 7 phosphate buffer and the layers were separated. The aqueous phase was diluted with phosphate buffer and extracted with CH<sub>2</sub>Cl<sub>2</sub> (3×10 mL). The combined extracts were concentrated under reduced pressure. The residue was dissolved in MeOH (3 mL) and pH 7 phosphate buffer (0.6 mL) was added. The mixture was cooled to  $0^{\circ}\text{C}$  and H<sub>2</sub>O<sub>2</sub> (30%, 0.75 mL) was added. The mixture was stirred at  $0^{\circ}\text{C}$  for 5 min and at rt for 50 min. It was then poured into water (40 mL), CH<sub>2</sub>Cl<sub>2</sub> was added, the layers were separated, and the aqueous phase was extracted with CH<sub>2</sub>Cl<sub>2</sub> (3×10 mL). The combined organic layers were washed with brine, dried over Na<sub>2</sub>SO<sub>4</sub> and concentrated under reduced pressure. The residue was purified by column chromatography (hexane/EtOAc 5:1) to afford **100** (352 mg, 43% wt/wt along with isopinocampheol/Et<sub>2</sub>O/EtOAc, 151 mg, 73%, dr, nd) as a yellow oil which crystallized in a freezer ( $-18^{\circ}\text{C}$ ).

**TLC** (hexane/EtOAc, 5:1):  $R_f = 0.17$

**<sup>1</sup>H-NMR** (400.1 MHz, CDCl<sub>3</sub>):  $\delta = 6.22$  (m<sub>c</sub>, 1H), 5.57 (m<sub>c</sub>, 1H), 4.47 (m<sub>c</sub>, 1H), 3.83 (d,  $J = 7.3$  Hz, 1H), 3.21 (s, 3H), 2.94 (d,  $J = 2.6$  Hz, 1H), 2.75 (qd,  $J = 7.0$  Hz,  $J = 7.0$  Hz, 1H),

2.68-2.51 (m, 2H), 1.99 (d,  $J = 2.0$  Hz, 3H), 1.85 (bs, 3H), 1.75 (d,  $J = 1.1$  Hz, 3H), 1.11 (d,  $J = 6.9$  Hz, 3H).

**$^{13}\text{C}$ -NMR** (100.6 MHz,  $\text{CDCl}_3$ ):  $\delta = 212.5, 148.8, 145.3, 106.3, 90.4, 86.3, 80.6, 76.6, 71.0, 57.0, 50.1, 47.6, 19.9, 15.4, 12.1, 4.4$ .

**HRMS:**  $m/z$  calcd for  $\text{C}_{16}\text{H}_{23}\text{INaO}_3$   $[\text{M}+\text{Na}]^+$ : 413.0584; found: 413.0587.

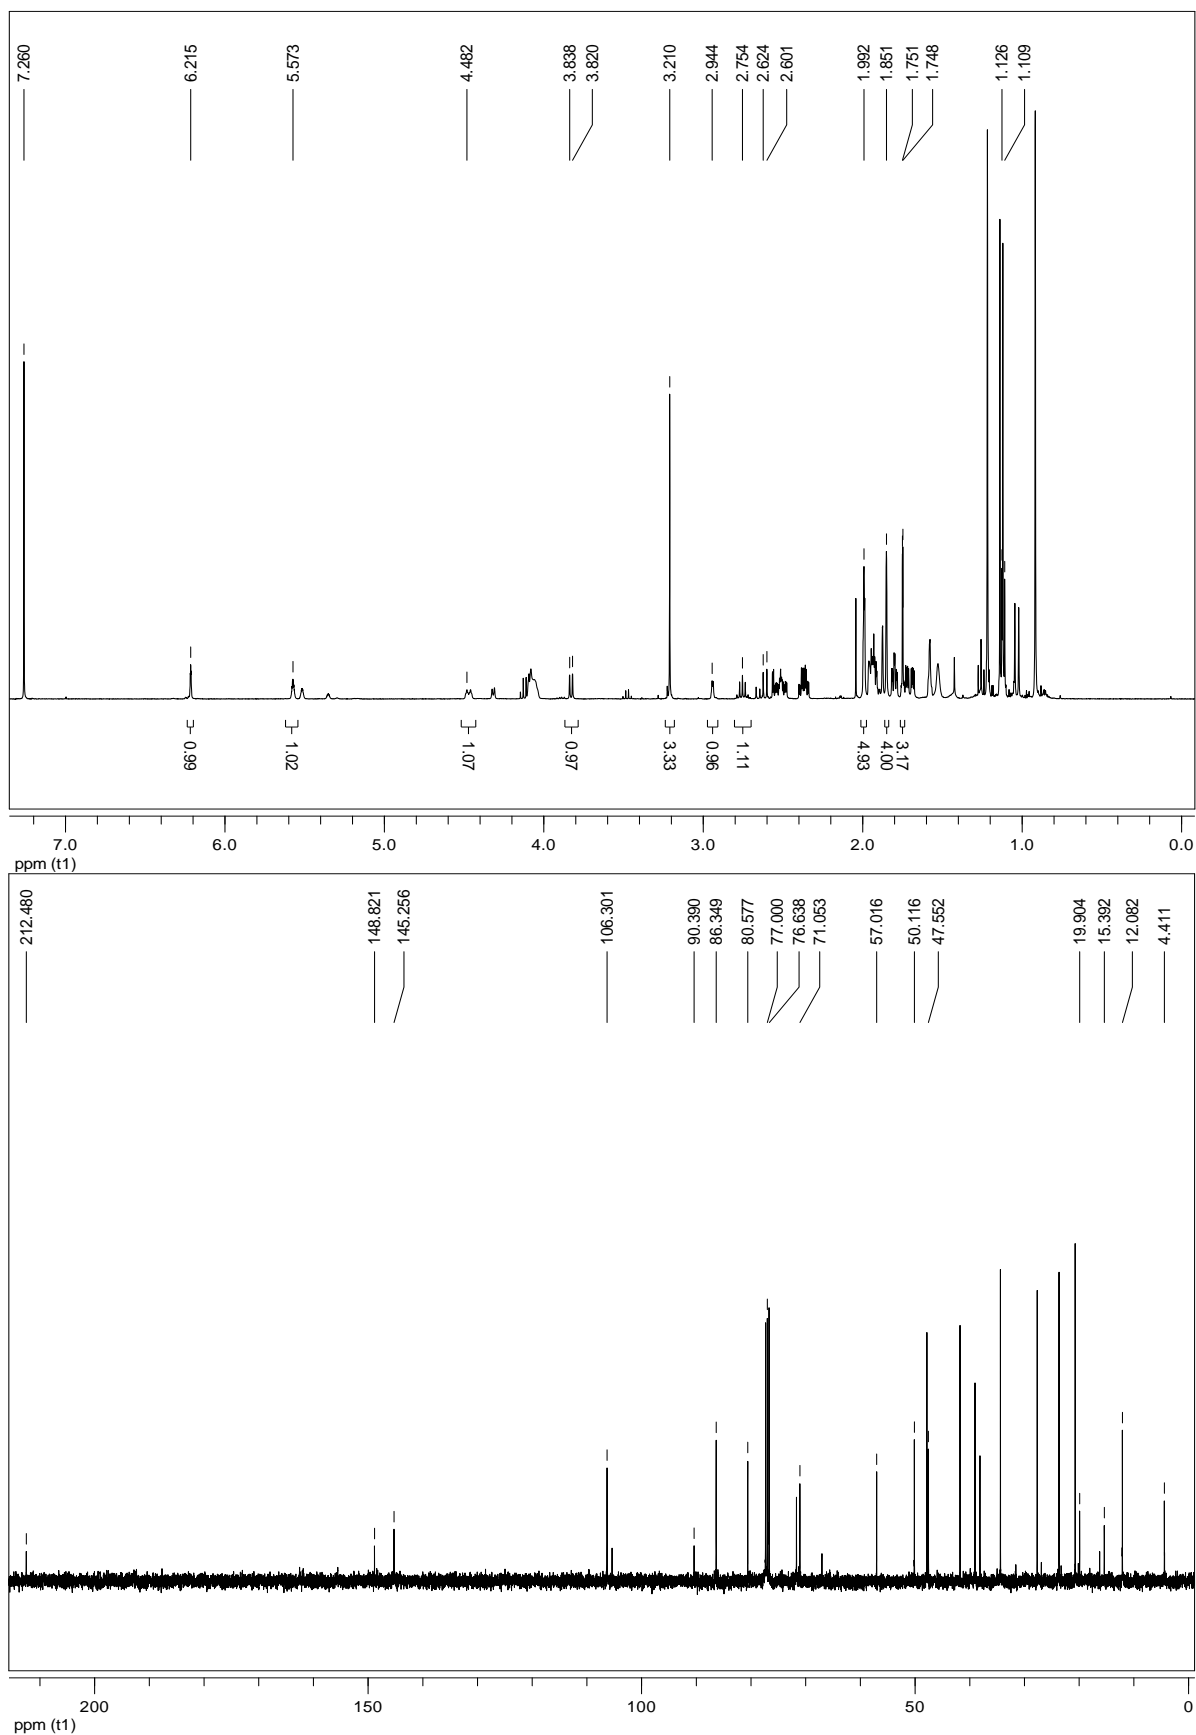

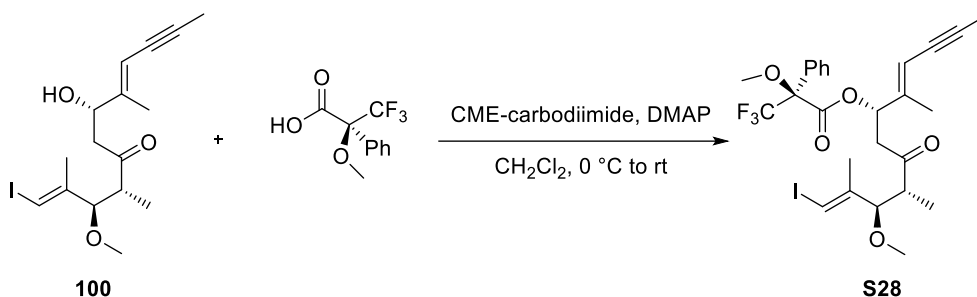

### ***R*-Mosher ester **S28**:**

Purification of the starting material: Isopinocampheol was removed from **100** at a rotavap (40 °C, 10<sup>-2</sup> mbar). Subsequent column chromatography (hexane/EtOAc 5:1) delivered **100** as a colourless oil.

To a cooled (0 °C) solution of (*S*)-3,3,3-trifluoro-2-methoxy-2-phenylpropanoic acid (43.2 mg, 0.185 mmol, 1.50 eq) in CH<sub>2</sub>Cl<sub>2</sub> (1.6 mL) over molecular sieves (beads, 3 Å) was added CME-carbodiimide (93.8 mg, 0.221 mmol, 1.80 eq). The mixture was stirred at 0 °C for 15 min, then a solution of the alcohol **100** (48.0 mg, 0.123 mmol, 1.00 eq) in CH<sub>2</sub>Cl<sub>2</sub> (1.4 mL) was added. The cooling bath was removed and DMAP (1.5 mg, 10 mol%) was added. As the conversion was incomplete after 1.5 h, the mixture was stirred at rt overnight. This did apparently not lead to any further conversion. Thus the suspension was directly applied on a silica gel column and purified (hexane/EtOAc 10:1) to afford ester **S28** as a colourless oil containing inseparable and unidentified impurities (21.6 mg, 29%). Furthermore some starting material was recovered (26.9 mg, 56%).

**TLC** (hexane/EtOAc, 5:1): *R<sub>f</sub>* = 0.39

**[α]<sub>D</sub><sup>24</sup>** = -2.84 (*c* = 1.08, CHCl<sub>3</sub>)

**<sup>1</sup>H-NMR** (400.1 MHz, CDCl<sub>3</sub>): δ = 7.49-7.43 (m, 2H), 7.43-7.34 (m, 3H), 6.18 (m<sub>c</sub>, 1H), 5.89 (dd, *J* = 3.2 Hz, *J* = 9.4 Hz, 1H), 5.65 (m<sub>c</sub>, 1H), 3.72 (d, *J* = 6.9 Hz, 1H), 3.50 (m<sub>c</sub>, 3H), 3.14 (s, 3H), 2.97 (dd, *J* = 9.4 Hz, *J* = 18.0 Hz, 1H), 2.61 (qd, *J* = 7.0 Hz, *J* = 7.0 Hz, 1H), 2.47 (dd, *J* = 3.4 Hz, *J* = 18.0 Hz, 1H), 2.00 (d, *J* = 2.3 Hz, 3H), 1.87 (bs, 3H), 1.70 (d, *J* = 1.1 Hz, 3H), 0.95 (d, *J* = 6.9 Hz, 3H).

**<sup>13</sup>C-NMR** (100.6 MHz, CDCl<sub>3</sub>): δ = 206.8, 165.2, 145.0, 143.9, 132.3, 129.5, 128.3 (2C), 127.5 (2C), 110.7, 92.3, 85.9, 80.6, 76.0, 74.6, 56.9, 55.4, 49.6, 45.1, 20.0, 15.2, 11.7, 4.5 (quartetts of CCF<sub>3</sub> and CCF<sub>3</sub> not assigned).

**IR** (neat,  $\nu/\text{cm}^{-1}$ ): 2983, 2936, 2875, 2849, 1749s, 1719, 1452, 1377, 1270s, 1253s, 1168s, 1120, 1083, 1018s, 992, 965, 917, 866, 828, 765, 718s, 698, 643, 510, 493, 466, 418, 404.

**HRMS** Calcd. for  $\text{C}_{26}\text{H}_{30}\text{F}_3\text{I}\text{NaO}_5$   $[\text{M}+\text{Na}]^+$   $m/z$  629.0982. Found: 629.0980.

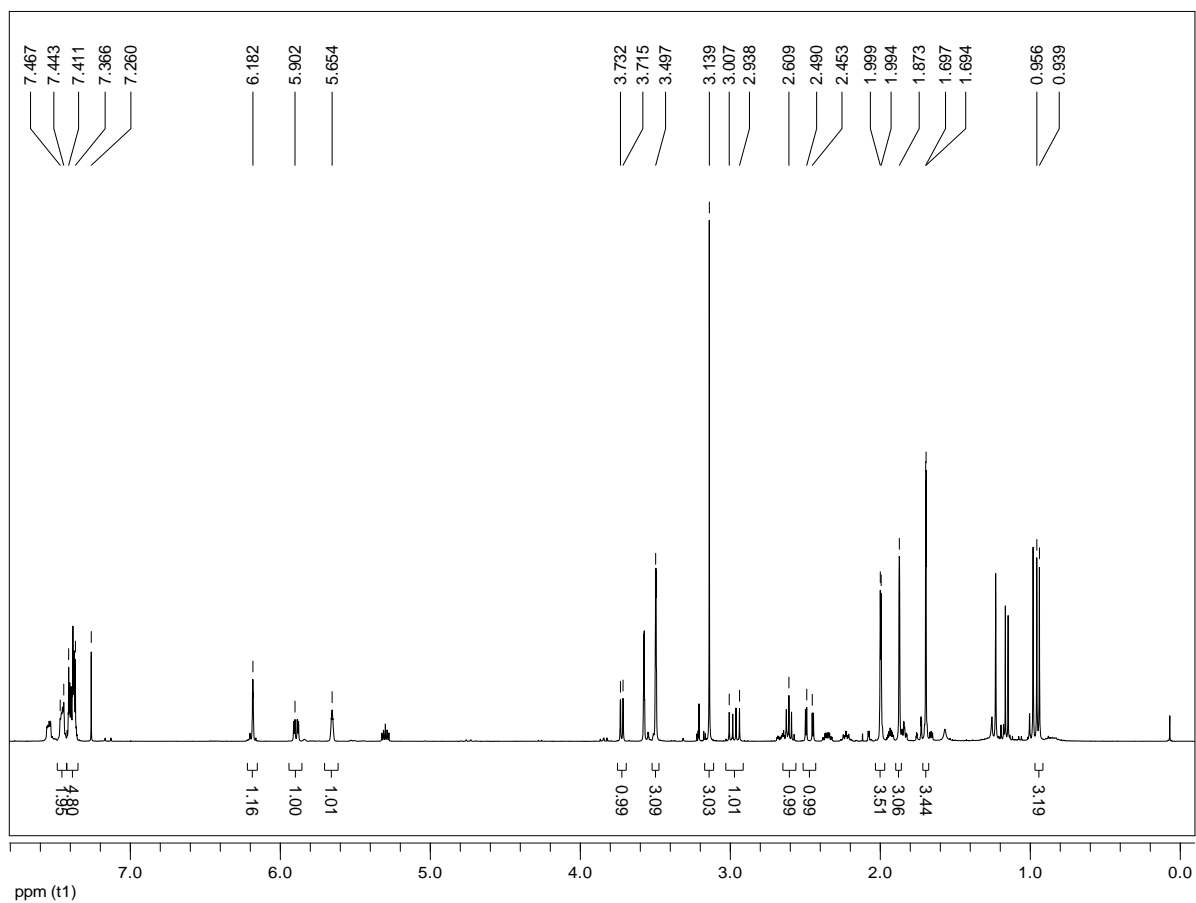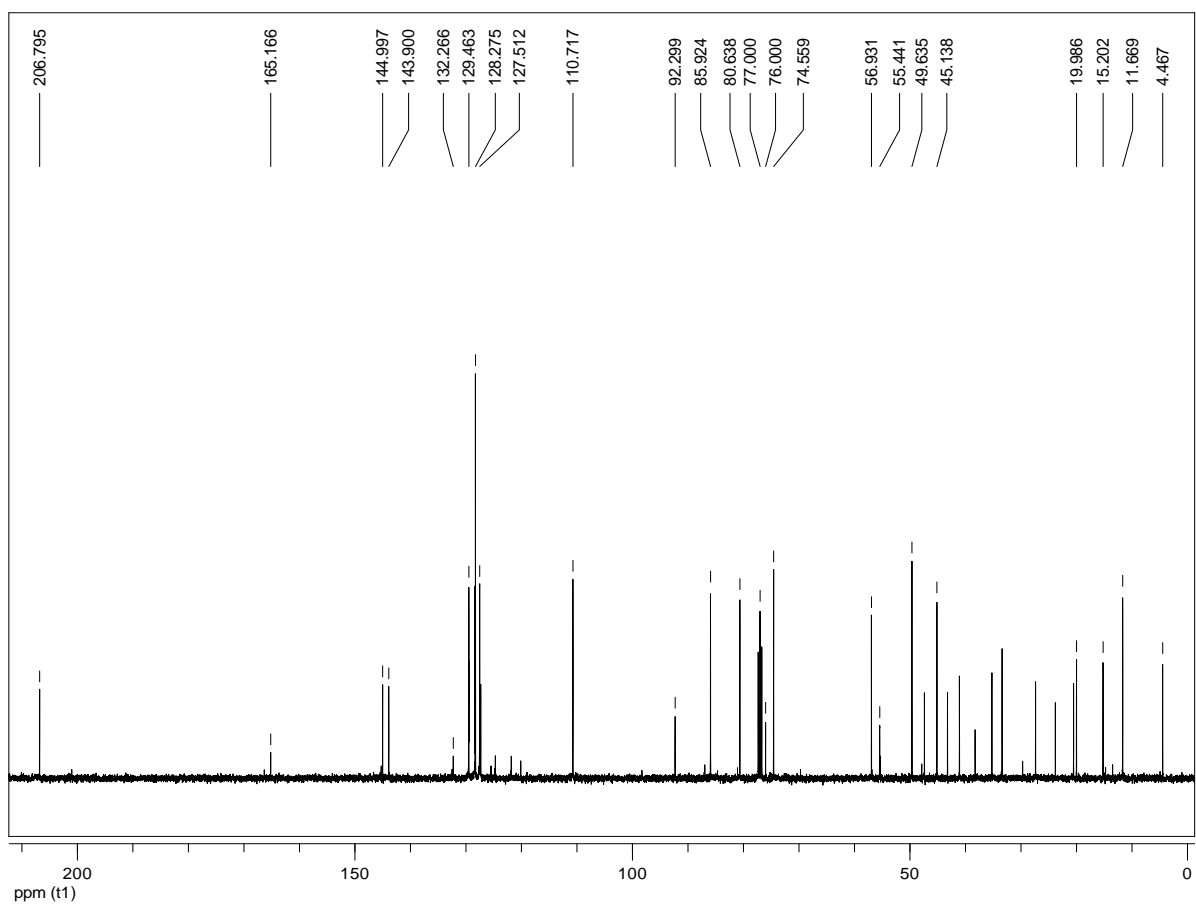

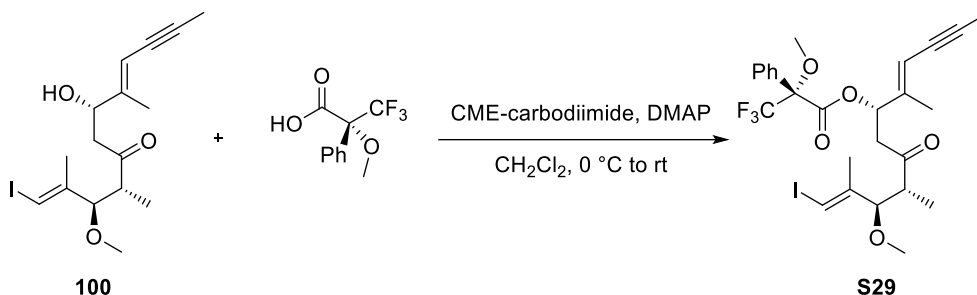

### S-Mosher ester **S29**:

Purification of the starting material: Isopinocampheol was removed from **100** at a rotavap (40 °C,  $10^{-2}$  mbar). Subsequent column chromatography (hexane/EtOAc 5:1) delivered **100** as a colourless oil.

To a cooled (0 °C) solution of (R)-3,3,3-trifluoro-2-methoxy-2-phenylpropanoic acid (43.2 mg, 0.185 mmol, 1.50 eq) in  $\text{CH}_2\text{Cl}_2$  (1.6 mL) over molecular sieves (beads, 3 Å) was added CME-carbodiimide (93.8 mg, 0.221 mmol, 1.80 eq). The mixture was stirred at 0 °C for 15 min, then a solution of the alcohol **100** (48.0 mg, 0.123 mmol, 1.00 eq) in  $\text{CH}_2\text{Cl}_2$  (1.4 mL) was added. The cooling bath was removed and DMAP (1.5 mg, 10 mol%) was added. As the conversion was incomplete after 1.5 h, the mixture was stirred at rt overnight and the suspension was directly applied onto a silica gel column and purified (hexane/EtOAc 10:1), which afford ester **S29** as a colourless oil containing inseparable and unidentified impurities (11.4 mg, 15%). Furthermore some starting material was recovered (27.1 mg, 56%).

**TLC** (hexane/EtOAc, 5:1):  $R_f = 0.39$

$[\alpha]_{\text{D}}^{24} = +54.7$  ( $c = 0.57$ ,  $\text{CHCl}_3$ )

**$^1\text{H-NMR}$**  (400.1 MHz,  $\text{CDCl}_3$ ):  $\delta = 7.51\text{--}7.45$  (m, 2H), 7.45–7.34 (m, 3H), 6.20 ( $m_c$ , 1H), 5.79 (dd,  $J = 2.6$  Hz,  $J = 9.8$  Hz, 1H), 5.51 ( $m_c$ , 1H), 3.81 (d,  $J = 7.0$  Hz, 1H), 3.49 ( $m_c$ , 3H), 3.16 (s, 3H), 2.99 (dd,  $J = 9.9$  Hz,  $J = 18.2$  Hz, 1H), 2.68 (qd,  $J = 7.0$  Hz,  $J = 7.0$  Hz, 1H), 2.49 (dd,  $J = 2.8$  Hz,  $J = 18.2$  Hz, 1H), 1.99 (d,  $J = 2.2$  Hz, 3H), 1.75 (bs, 3H), 1.72 (d,  $J = 1.1$  Hz, 3H), 1.04 (d,  $J = 6.9$  Hz, 3H).

**$^{13}\text{C-NMR}$**  (100.6 MHz,  $\text{CDCl}_3$ ):  $\delta = 207.4, 165.3, 145.0, 144.0, 132.3, 129.5, 128.3$  (2C), 127.4 (2C), 110.1, 92.0, 86.0, 80.7, 76.0, 74.6, 57.0, 55.5, 49.7, 45.3, 20.0, 15.1, 11.8, 4.5 (quartetts of  $\text{CCF}_3$  and  $\text{CCF}_3$  not assigned).



**IR** (neat,  $\nu/\text{cm}^{-1}$ ): 2982, 2935, 2920, 2878, 2851, 2828, 1751s, 1717s, 1588, 1452, 1377, 1271s, 1255s, 1169, 1121s, 1086s, 1016s, 991s, 965, 918, 826, 765, 721s, 698, 666, 532, 498, 473, 459, 428, 406.

**HRMS** Calcd. for  $\text{C}_{26}\text{H}_{30}\text{F}_3\text{INaO}_5$   $[\text{M}+\text{Na}]^+$   $m/z$  629.0982. Found: 629.0975.

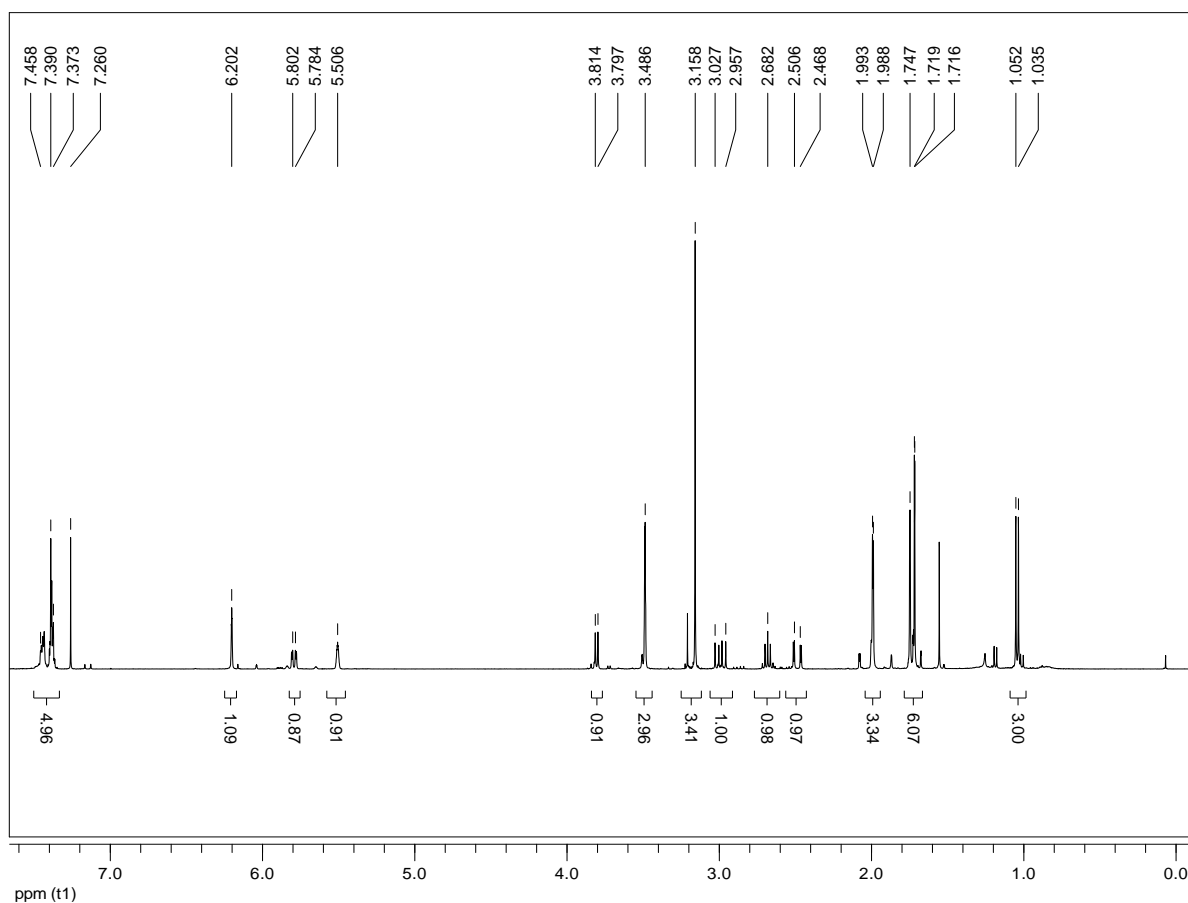

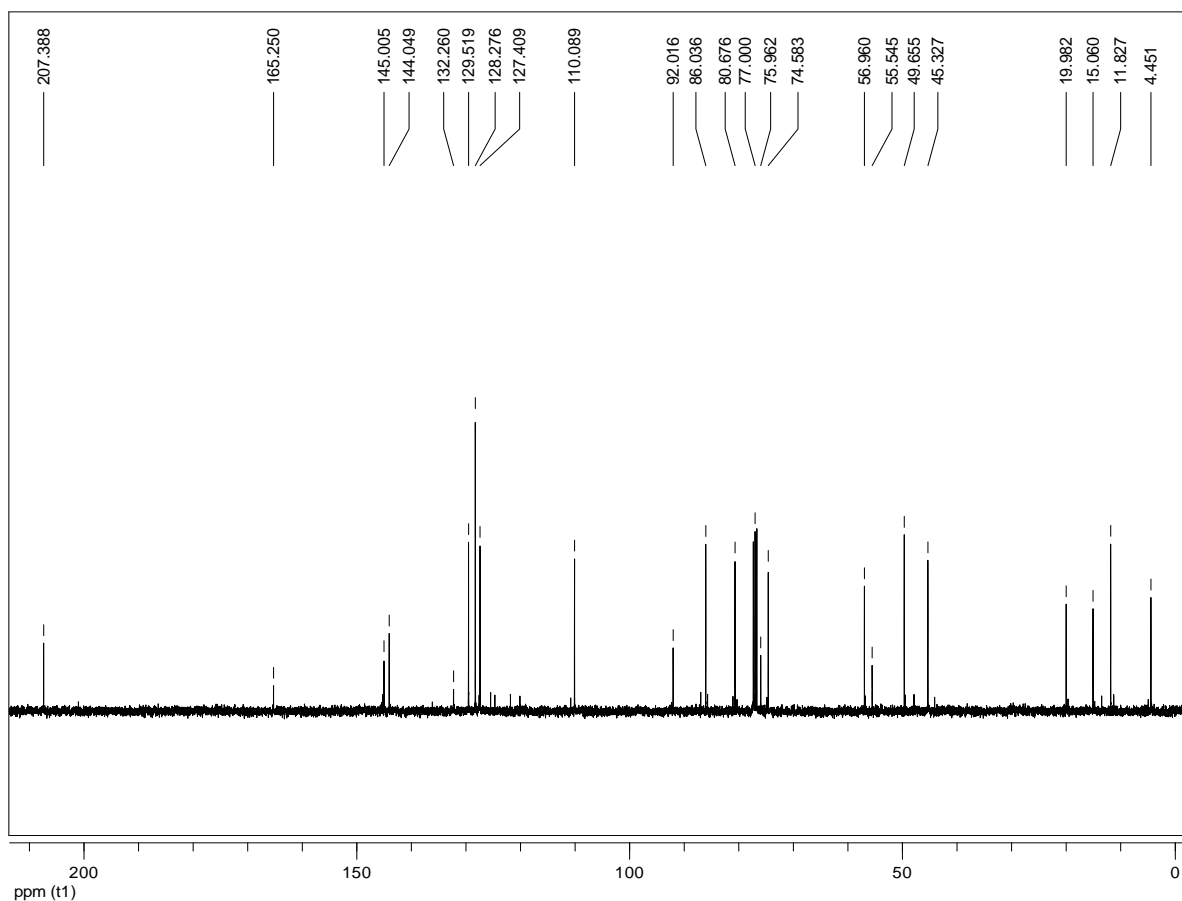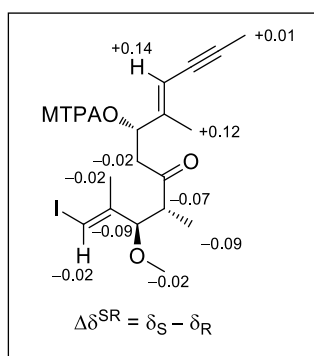

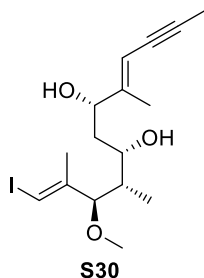

**(1E,3R,4S,5S,7S,8E)-1-iodo-3-methoxy-2,4,8-trimethyldodeca-1,8-dien-10-yne-5,7-diol (S30):** A solution of (NMe<sub>4</sub>)BH(OAc)<sub>3</sub> (455 mg, ca. 4.65 eq) in MeCN (1.5 mL) and AcOH (1.5 mL) was cooled to –40 °C (MeCN/dry ice). To the frozen mixture was added a solution of ketone **100** (145 mg, 372 μmol, 1.00 eq) in MeCN (0.5 mL, rinsed with 2×0.4 mL). The resulting thick slurry was stirred for a few min at the same temperature and was then stored in a freezer (–18 °C) for 19.5 h. The suspension was allowed to warm to rt and stirred for another 1 h; *Rochelle* salt (aq. sat.) was then added, leading to the immediate formation of a white suspension. This mixture was stirred at rt for 1 h. Then it was diluted with water, some CH<sub>2</sub>Cl<sub>2</sub> was added and the acetic acid was neutralized with NaHCO<sub>3</sub> (s). As soon as the gas evolution had stopped, the layers were separated and the aqueous phase was extracted with CH<sub>2</sub>Cl<sub>2</sub> (3×10 mL). The combined organic layers were washed with brine, dried over Na<sub>2</sub>SO<sub>4</sub> and concentrated under reduced pressure. The residue was purified by column chromatography (hexane/Et<sub>2</sub>O 2:1→Hexane/EtOAc 1:1) to afford **S30** (143 mg, 91% wt/wt along with EtOAc, 131 mg, 90%, 1,3-*syn* isomer not detectable by NMR) as a yellow oil.

**TLC** (hexane/EtOAc, 1:1): R<sub>f</sub> = 0.20

**[α]<sub>D</sub><sup>24</sup>** = +30.9 (*c* = 1.05, CHCl<sub>3</sub>)

**<sup>1</sup>H-NMR** (400.1 MHz, CDCl<sub>3</sub>): δ = 6.18 (m<sub>c</sub>, 1H), 5.63 (m<sub>c</sub>, 1H), 4.40 (m<sub>c</sub>, 1H), 3.95 (d, *J* = 3.6 Hz, 1H), 3.81 (m<sub>c</sub>, 1H), 3.27 (s, 3H), 3.21 (d, *J* = 5.8 Hz, 1H), 2.88 (d, *J* = 4.7 Hz, 1H), 2.00 (d, *J* = 2.3 Hz, 3H), 1.85 (bs, 3H), 1.80-1.71 (m, 3H), 1.76 (d, *J* = 1.0 Hz, 3H), 0.84 (d, *J* = 7.1 Hz, 3H).

**<sup>13</sup>C-NMR** (100.6 MHz, CDCl<sub>3</sub>): δ = 150.8, 145.1, 105.5, 90.1, 86.6, 78.3, 76.7, 73.3, 71.5, 57.3, 40.7, 38.6, 21.8, 15.8, 11.1, 4.4.

**IR** (neat, ν/cm<sup>–1</sup>): 3408br, 2976, 2936, 2914, 2851, 2829, 2365, 2353, 2342, 2331, 171738, 1619, 1441, 1374, 1242s, 1193, 1112, 1088s, 1046s, 1008, 957, 936, 848, 810, 785, 680, 669, 636, 603, 532, 513, 501, 489, 475.

**HRMS:**  $m/z$  calcd for  $C_{16}H_{25}INaO_3$   $[M+Na]^+$ : 415.0741; found: 415.0740.

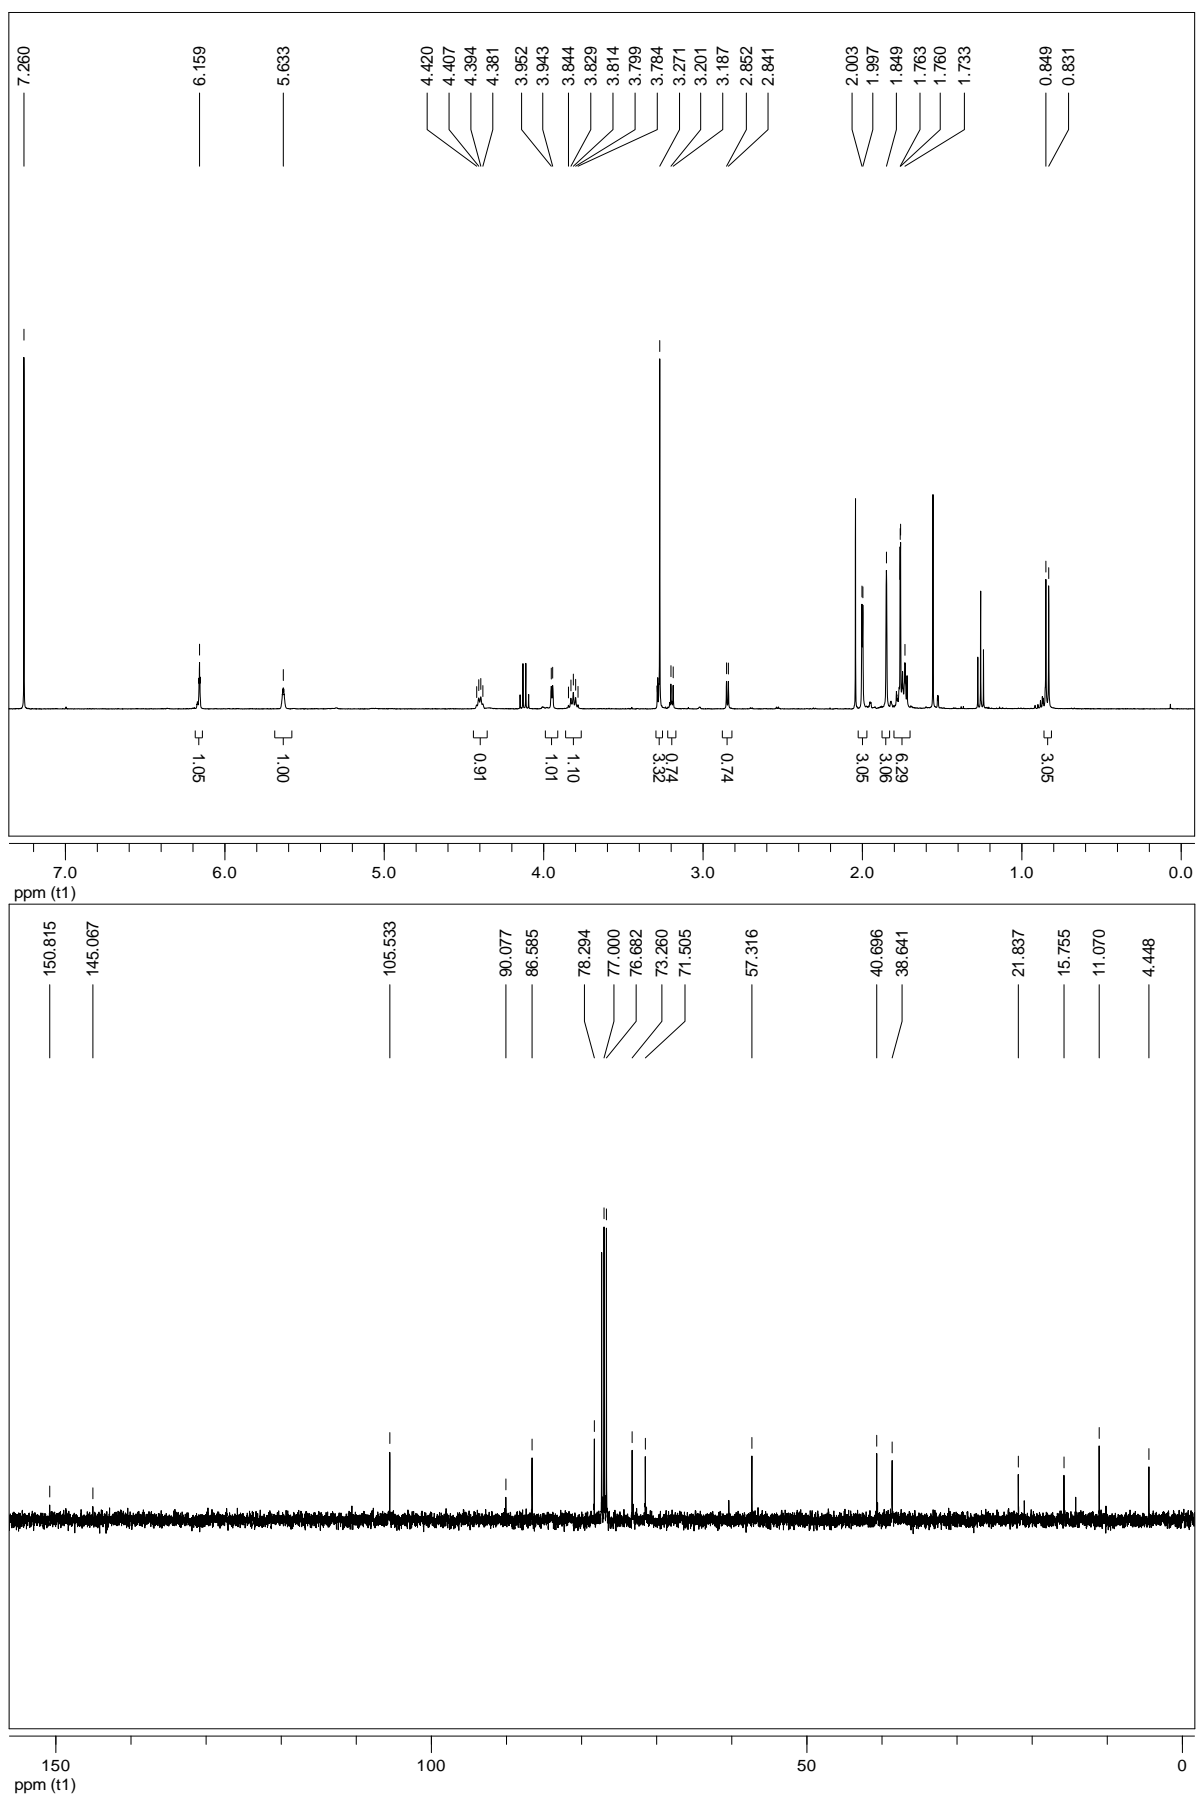

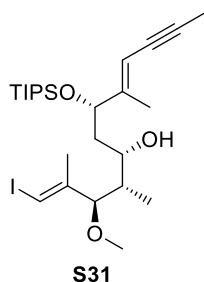

**(1*E*,3*R*,4*S*,5*S*,7*S*,8*E*)-1-iodo-3-methoxy-2,4,8-trimethyl-7-((triisopropylsilyl)-oxy)dodeca-1,8-dien-10-yn-5-ol (S31):** To a solution of alcohol **S30** (1.15 g, 2.93 mmol, 1.00 eq) in CH<sub>2</sub>Cl<sub>2</sub> (79 mL) over molecular sieves (3 Å beads) was added 2,6-lutidine (1.71 mL, 14.7 mmol, 5.00 eq) at rt. The mixture was stirred at rt for 5 min, then it was cooled to -78 °C and, after another 5 min stirring, TIPSOTf (867 µL, 3.22 mmol, 1.10 eq) was added. After stirring at -78 °C for 1 h the reaction was quenched with NaHCO<sub>3</sub> (sat. aq.), the layers were separated and the aqueous phase was extracted with CH<sub>2</sub>Cl<sub>2</sub> (3×20 mL). The combined organic extracts were washed with brine, dried over MgSO<sub>4</sub> and the solvent was removed under reduced pressure. The crude product was purified by column chromatography (pent/Et<sub>2</sub>O 10:1→hexane/Et<sub>2</sub>O 7:1) to afford the desired product **S31** as a colourless oil (1.56 g, 97%).

**TLC** (hexane/EtOAc, 5:1): *R<sub>f</sub>* = 0.53

**[α]<sub>D</sub><sup>24</sup>** = +12.95 (*c* = 0.97, CHCl<sub>3</sub>)

**<sup>1</sup>H-NMR** (400.1 MHz, CDCl<sub>3</sub>): δ = 6.10 (m<sub>c</sub>, 1H), 5.65 (m<sub>c</sub>, 1H), 4.53 (t, *J* = 4.1 Hz, 1H), 3.77 (d, *J* = 4.2 Hz, 1H), 3.74-3.66 (m, 1H), 3.50 (d, *J* = 2.4 Hz, 1H), 3.23 (s, 3H), 2.01 (d, *J* = 2.3 Hz, 3H), 1.81 (bs, 3H), 1.76-1.67 (m, 3H), 1.74 (d, *J* = 1.0 Hz, 3H), 1.09-1.04 (m, 21H), 0.81 (d, *J* = 7.0 Hz, 3H).

**<sup>13</sup>C-NMR** (100.6 MHz, CDCl<sub>3</sub>): δ = 149.5, 146.1, 106.3, 90.2, 86.1, 77.8, 76.7, 75.6, 69.8, 57.3, 41.3, 38.3, 21.3, 18.0 (3C), 16.3, 12.3 (6C), 9.9, 4.5.

**IR** (neat, ν/cm<sup>-1</sup>): 3515br, 2942, 2893, 2866, 2369, 2358, 2344, 2333, 1620, 1463, 1380, 1255, 1193, 1165, 1089s, 1063s, 1012, 997, 950, 920, 882s, 854, 785, 755, 744, 678, 658, 601, 567, 495, 479, 451, 430, 418, 407.

**HRMS:** *m/z* calcd for C<sub>25</sub>H<sub>45</sub>INaO<sub>3</sub>Si [M+Na]<sup>+</sup>: 571.2075; found: 571.2088.

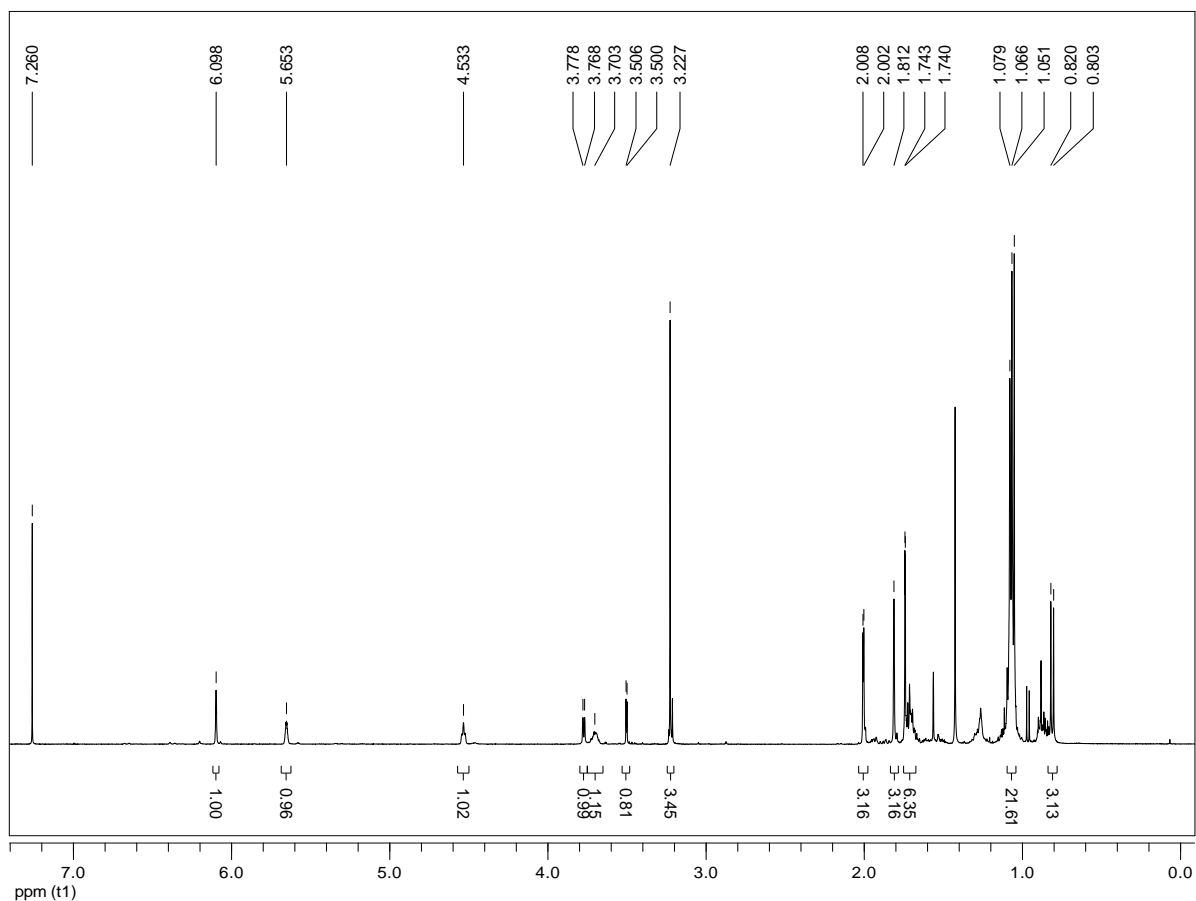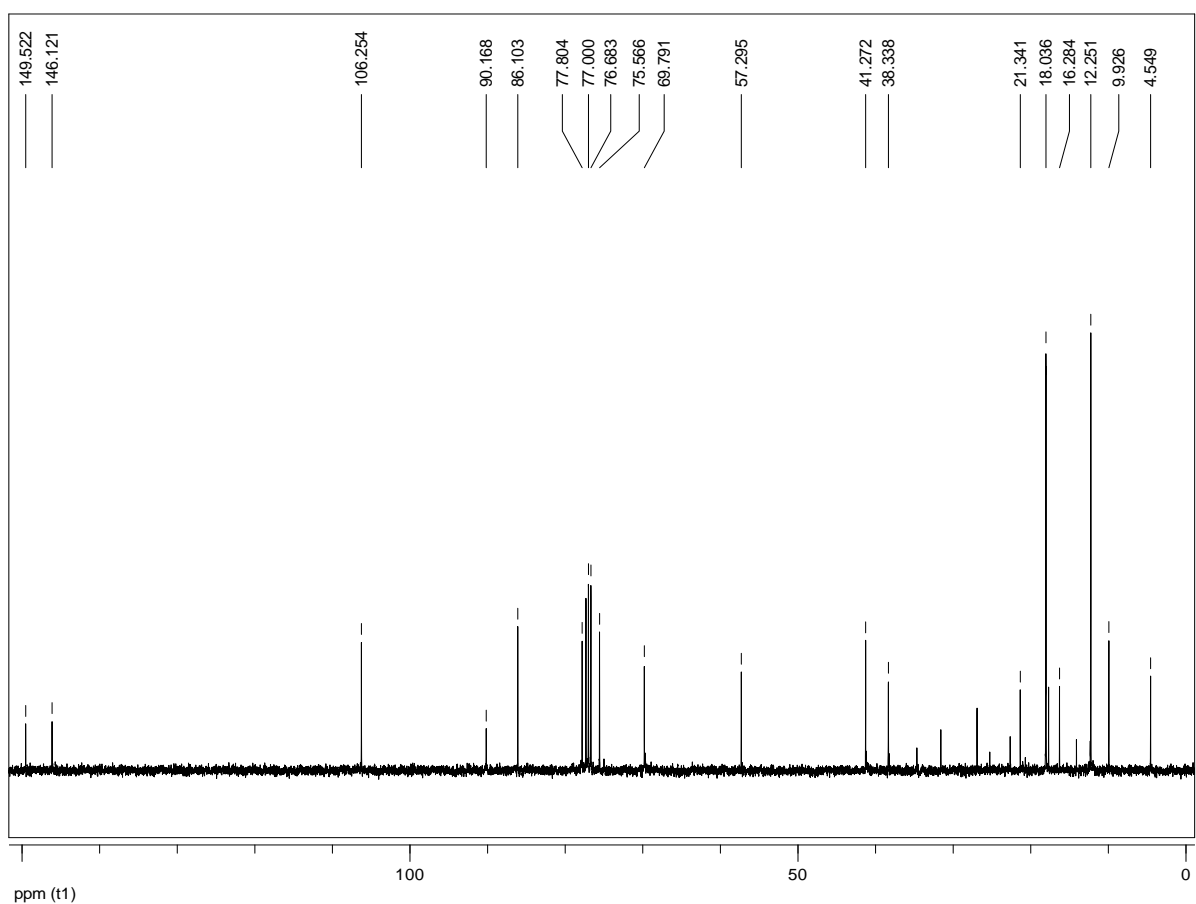

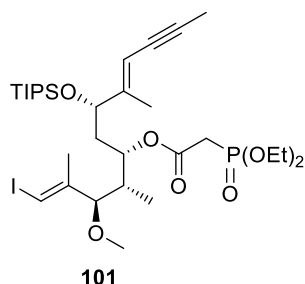

**(1*E*,3*R*,4*S*,5*S*,7*S*,8*E*)-1-iodo-3-methoxy-2,4,8-trimethyl-7-((triisopropylsilyl)oxy)-dodeca-1,8-dien-10-yn-5-yl 2-(diethoxyphosphoryl)acetate (**101**):** To a cooled (0 °C) solution of diethylphosphonoacetic acid (**55**) (55  $\mu$ L, 0.345 mmol, 1.50 eq) in CH<sub>2</sub>Cl<sub>2</sub> (3 mL) over molecular sieves (beads, 3 Å) was added CME-carbodiimide (175 mg, 0.413 mmol, 1.80 eq). The mixture was stirred at 0 °C for 15 min, then a solution of alcohol **S31** (126 mg, 0.230 mmol, 1.00 eq) in CH<sub>2</sub>Cl<sub>2</sub> (1 mL, rinsed with 0.9 mL, 0.5 mL) was added. The cooling bath was removed and DMAP (2.8 mg, 10 mol%) was added. After 3 h the mixture was concentrated under reduced pressure. The residue was purified by column chromatography (CH<sub>2</sub>Cl<sub>2</sub>:acetone 30:1→15:1) to afford the ester **101** (137 mg, 82%) as a pale yellow oil.

**TLC** (CH<sub>2</sub>Cl<sub>2</sub>/acetone, 10:1):  $R_f$  = 0.63

**$[\alpha]_D^{24}$**  = +28.41 ( $c$  = 0.995, CHCl<sub>3</sub>)

**<sup>1</sup>H-NMR** (400.1 MHz, CDCl<sub>3</sub>):  $\delta$  = 6.15 (m, 1H), 5.32-5.28 (m, 1H), 4.69 (ddd,  $J$  = 1.2 Hz,  $J$  = 4.4 Hz,  $J$  = 10.4 Hz, 1H), 4.20-4.10 (m, 4H), 4.07 (dd,  $J$  = 5.9 Hz,  $J$  = 7.8 Hz, 1H), 3.41 (d,  $J$  = 6.8 Hz, 1H), 3.17 (s, 3H), 2.91 (ddd,  $J$  = 14.5 Hz,  $J$  = 21.4 Hz,  $J$  = 30.0 Hz, 2H), 2.06-1.92 (m, 1H), 1.96 (d,  $J$  = 2.1 Hz, 3H), 1.91-1.77 (m, 1H), 1.81 (bs, 6H), 1.73-1.63 (m, 1H), 1.33 (m, 6H), 1.73-1.63 (m, 21H), 0.93 (d,  $J$  = 6.9 Hz, 3H).

**<sup>13</sup>C-NMR** (100.6 MHz, CDCl<sub>3</sub>):  $\delta$  = 165.1 (d,  $J$  = 6.4 Hz), 150.9, 146.5, 106.5, 89.7, 87.1, 78.9, 76.8, 76.0, 73.6, 62.53, 62.46, 56.7, 39.0, 35.8, 34.3 (d,  $J$  = 134 Hz), 19.7, 18.13 (2C), 18.05, 16.35 (d,  $J$  = 5.7 Hz), 16.31 (d,  $J$  = 5.9 Hz), 13.7, 12.4 (6C), 9.7, 4.4.

**IR** (neat,  $\nu/\text{cm}^{-1}$ ): 2963, 2942, 2893, 2866, 1734, 1463, 1384, 1261, 1163, 1089, 1051 (s), 1024 (s), 966, 883, 856, 811, 784, 734, 682, 654, 620, 572, 501, 491, 477, 461, 446, 428, 419, 408.

**HRMS**:  $m/z$  calcd for C<sub>31</sub>H<sub>56</sub>INaO<sub>7</sub>PSi [M+Na]<sup>+</sup>: 749.2470; found: 749.2476.

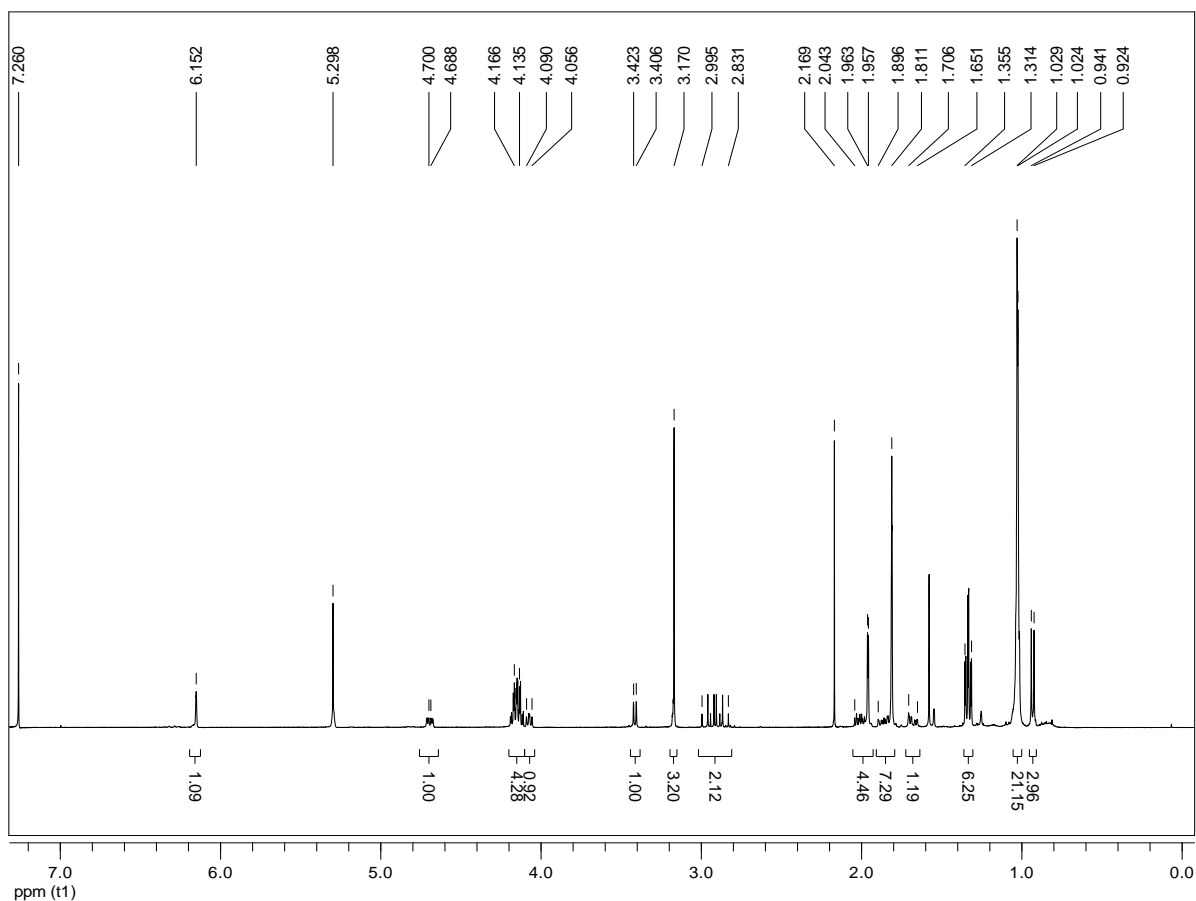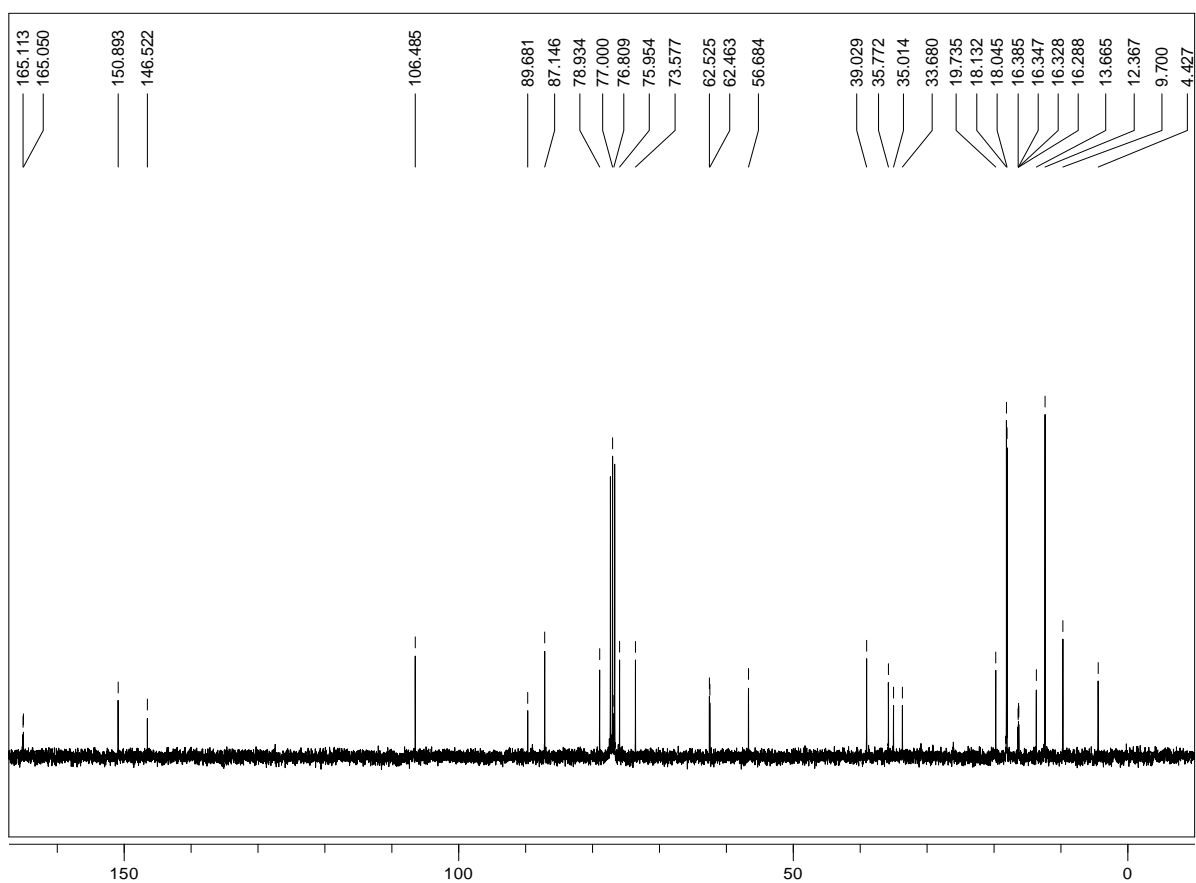



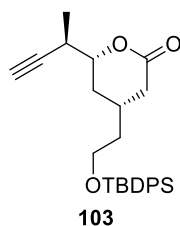

A 43.3 mM solution of the *Seyferth-Gilbert* reagent (dimethyl (diazomethyl)phosphonate) in THF was prepared as follows: To a solution of diazo phosphonate **102** (13.0 mg, 0.09 mmol, 1.1 equiv) in THF (2.0 mL) was added solid potassium *tert*-butoxide (11.0 mg, 0.10 mmol, 1.2 equiv) at  $-78\text{ }^{\circ}\text{C}$  in one portion. After stirring at  $-78\text{ }^{\circ}\text{C}$  for 30 min, 0.16 mL of the solution (1.1 equiv of *Seyferth-Gilbert* reagent) were added at  $-78\text{ }^{\circ}\text{C}$  to a solution of crude **66** (2.8 mg, 0.01 mmol, 1.0 equiv) in THF (0.5 mL). After stirring for 2 h at  $-78\text{ }^{\circ}\text{C}$ , the reaction mixture was quenched with pH7 buffer (2 mL). The reaction mixture was diluted with Et<sub>2</sub>O and brine. The layers were separated and the aqueous layer was extracted with Et<sub>2</sub>O (2 x 10 mL). The combined organic extracts were washed with brine, dried over MgSO<sub>4</sub>, filtered and concentrated under reduced pressure. The crude product was purified by column chromatography (hexane/EtOAc, 5:1) to afford **103** (1.2 mg, 43%) as a colorless oil. The analytical data were identical to those reported in literature.<sup>22</sup>

**R<sub>f</sub>** = 0.32 (hexane/EtOAc, 5:1).

**<sup>1</sup>H-NMR** (400.1 MHz, CDCl<sub>3</sub>):  $\delta$  = 7.68-7.62 (m, 4H), 7.47-7.36 (m, 6H), 4.11 (ddd,  $J$  = 2.9, 6.9, 11.8 Hz, 1H), 3.72 (t,  $J$  = 6.0 Hz, 2H), 2.74 (mc, 1H), 2.67 (ddd,  $J$  = 2.2, 5.2, 17.1 Hz, 1H), 2.26-2.13 (m, 2H), 2.11 (d,  $J$  = 2.5 Hz, 1H), 2.11-2.02 (m, 1H), 1.65-1.51 (m, 2H), 1.40-1.27 (m, 1H), 1.28 (d,  $J$  = 7.0 Hz, 3H), 1.05 (s, 9H).

**<sup>13</sup>C-NMR** (100.6 MHz, CDCl<sub>3</sub>):  $\delta$  = 170.7, 135.5, 133.5, 129.8, 127.7, 83.9, 82.2, 71.3, 60.8, 38.6, 36.4, 32.1, 32.0, 28.2, 26.9, 19.2, 17.0.

**HRMS (ESI)**:  $m/z$  calcd for C<sub>27</sub>H<sub>38</sub>NO<sub>3</sub>Si [ $M + \text{NH}_4$ ]<sup>+</sup>: 452.2615, found: 452.2628.

<sup>22</sup> Mitchell, I. S.; Pattenden, G.; Stonehouse, J. *Org. Biomol. Chem.* **2005**, 3, 4412-4431.

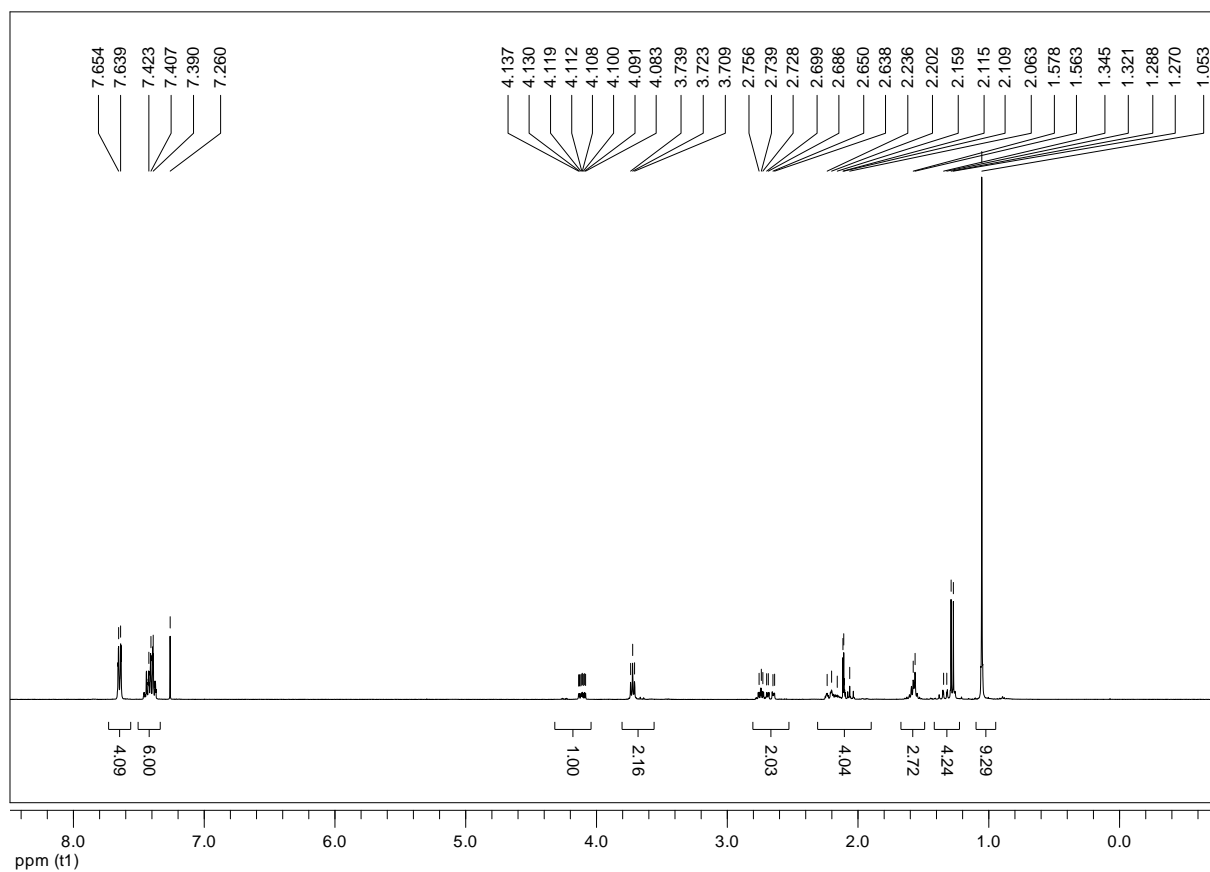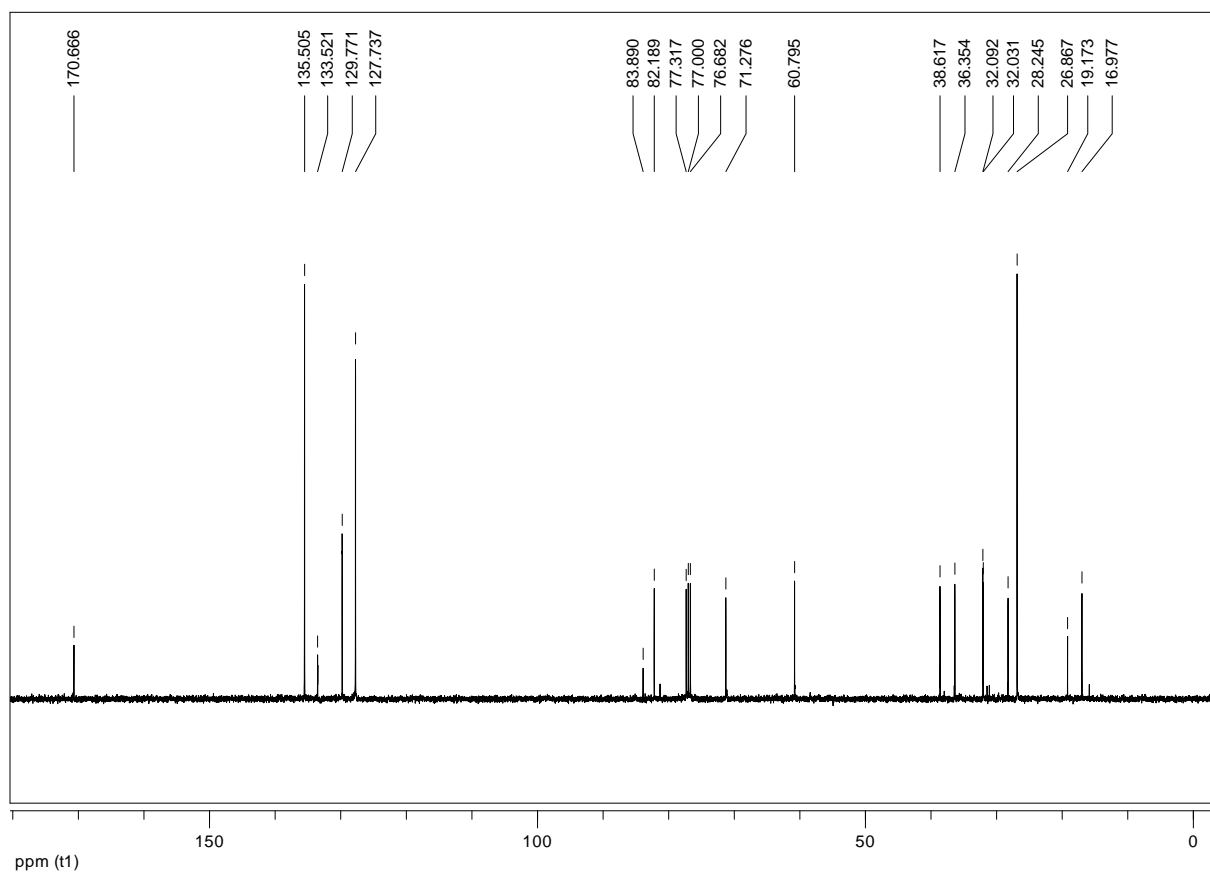

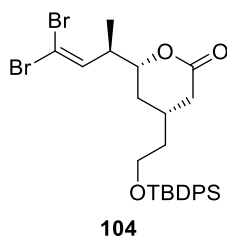

**(4*R*,6*R*)-4-(2-((*tert*-Butyldiphenylsilyl)oxy)ethyl)-6-((*R*)-4,4-dibromobut-3-en-2-yl)tetrahydro-2*H*-pyran-2-one (104):** To a solution of CBr<sub>4</sub> (408 mg, 1.23 mmol, 1.8 equiv) in CH<sub>2</sub>Cl<sub>2</sub> (2.5 mL) was added at 0 °C triphenylphosphine (645 mg, 2.46 mmol, 3.6 equiv). After stirring for a few minutes at 0 °C, the yellow reaction mixture was cooled to –78 °C and a solution of **103** (300 mg, 0.68 mmol, 1.0 equiv, crude) in CH<sub>2</sub>Cl<sub>2</sub> (4.4 mL) was added dropwise. After stirring for 45 min at –78 °C, the reaction mixture was diluted with sat. NH<sub>4</sub>Cl (30 mL) and CH<sub>2</sub>Cl<sub>2</sub> (30 mL). The layers were separated and the aqueous layer was extracted with CH<sub>2</sub>Cl<sub>2</sub> (2 x 15 mL). The combined organic extracts were dried over MgSO<sub>4</sub>, filtered and concentrated under reduced pressure. The residue was purified by column chromatography (hexane/EtOAc, 15:1 → 10:1 → 5:1) to afford **104** (325 mg, 80% over 2 steps) as a colorless oil.

**R<sub>f</sub>** = 0.47 (hexane/EtOAc, 5:1)

**[α]<sub>D</sub><sup>24</sup>** = –20.2° [*c* = 0.189, CHCl<sub>3</sub>]

**<sup>1</sup>H-NMR** (400.1 MHz, CDCl<sub>3</sub>): δ = 7.69–7.60 (m, 4H), 7.49–7.34 (m, 6H), 6.38 (d, *J* = 9.6 Hz, 1H), 4.14 (ddd, *J* = 2.8, 5.5, 11.9 Hz, 1H), 3.71 (t, *J* = 6.0 Hz, 2H), 2.72–2.59 (m, 2H), 2.16 (m<sub>c</sub>, 1H), 2.06 (dd, *J* = 10.9, 17.2 Hz, 1H), 1.84 (d, *J* = 13.5 Hz, 1H), 1.56 (m<sub>c</sub>, 2H), 1.31–1.12 (m, 1H), 1.10 (d, *J* = 6.8 Hz, 3H), 1.06 (s, 9H).

**<sup>13</sup>C-NMR** (100.6 MHz, CDCl<sub>3</sub>): δ = 170.7, 139.1, 135.5, 133.5, 133.4, 129.8, 127.7, 90.1, 81.6, 60.7, 43.2, 38.6, 36.3, 32.7, 28.4, 26.9, 19.1, 13.7.

**IR** (neat, ν/cm<sup>–1</sup>): 3070w, 2930m, 2857w, 1736s, 1471w, 1428m, 1388w, 1227m, 1107s, 1007m, 822m, 787m, 738s, 701s, 613m, 504s.

**HRMS (ESI):** *m/z* calcd for C<sub>27</sub>H<sub>34</sub>Br<sub>2</sub>NaO<sub>3</sub>Si [*M* + Na]<sup>+</sup>: 615.0536, found: 615.0545.

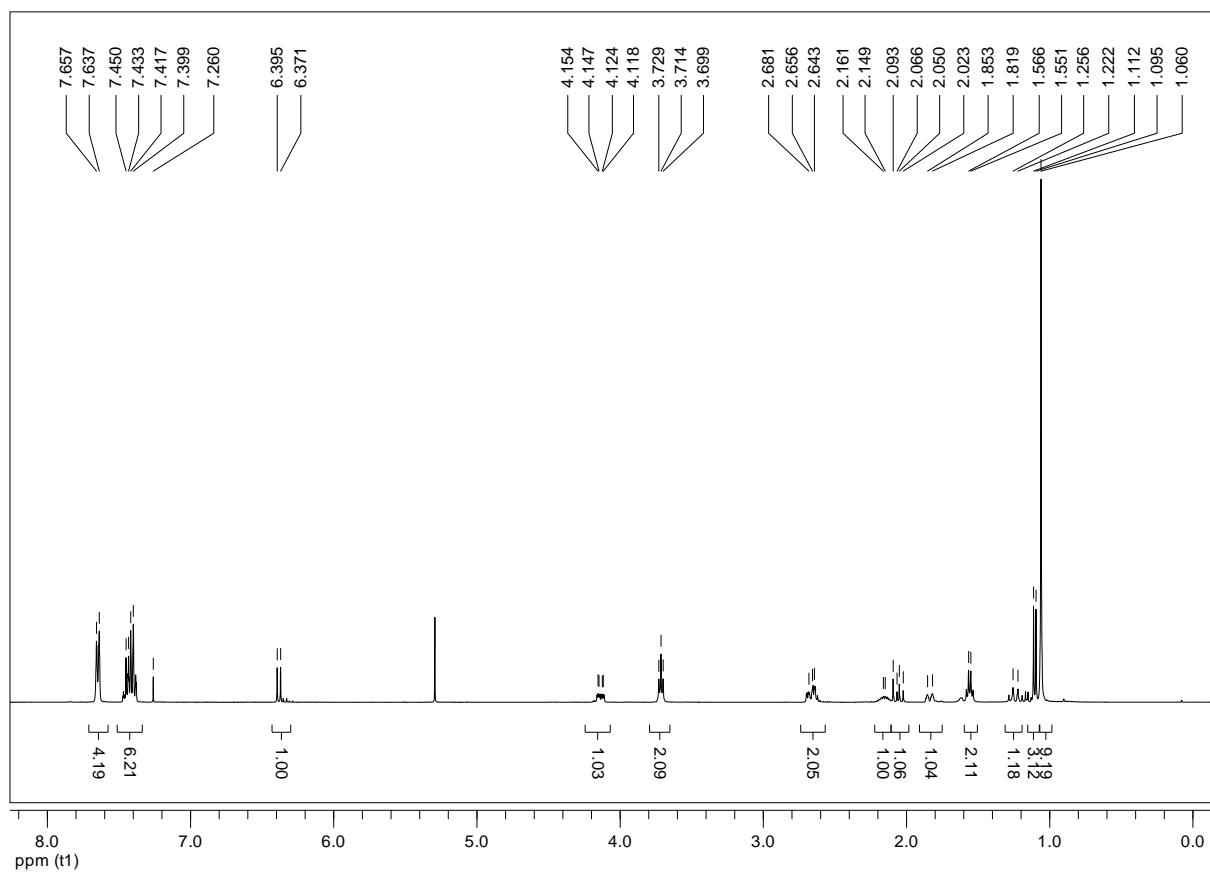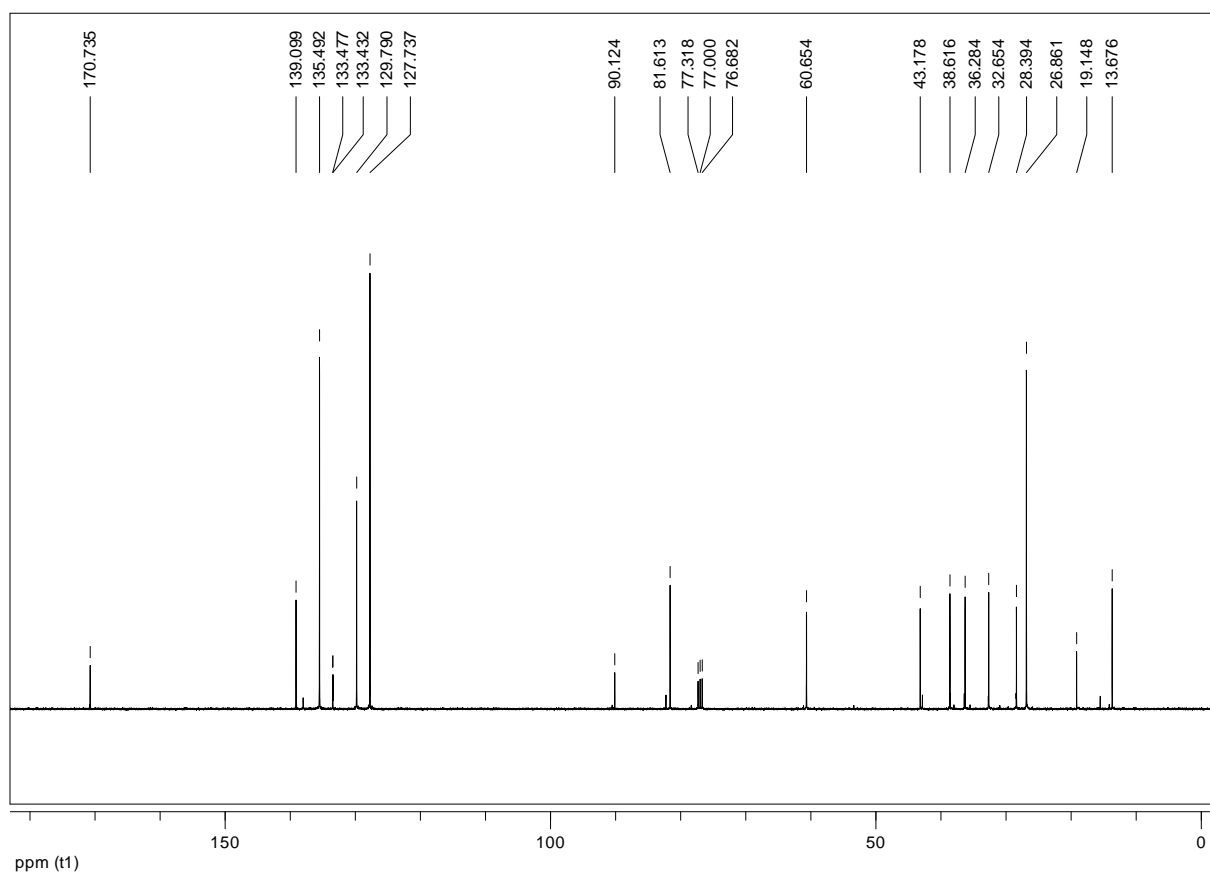

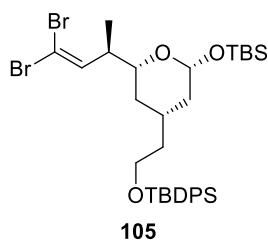

**tert-Butyl(2-((2R,4R,6R)-2-(tert-butyldimethylsilyloxy)-6-((R)-4,4-dibromobut-3-en-2-yl)tetrahydro-2H-pyran-4-yl)ethoxy)diphenylsilane (105):** To a solution of **104** (331 mg, 0.56 mmol, 1.00 equiv) in CH<sub>2</sub>Cl<sub>2</sub> (6 mL) was added dropwise at –78 °C DIBAL (0.56 mL, 0.67 mmol, 1.20 equiv, 1.2 M in toluene). The mixture was stirred at the same temperature for 1 h. Because incomplete conversion was observed according to TLC, more DIBAL (46.4 µL, 0.1 equiv) was added. After stirring for 30 min at –78 °C, the reaction mixture was quenched with sat. *Rochelle* salt (25 mL) and diluted with CH<sub>2</sub>Cl<sub>2</sub>. After stirring for 15 min at rt, the layers were separated. The aqueous phase was extracted with CH<sub>2</sub>Cl<sub>2</sub> (3 x 15 mL) and the combined organic extracts were washed with brine and dried over MgSO<sub>4</sub>. The solvent was removed under reduced pressure. The crude hemiacetal (353 mg, >100%) was used for the next step without further purification.

$R_f$  = 0.39 (hexane/EtOAc, 5:1)

To a solution of the above hemiacetal (332 mg, 0.56 mmol, 1.00 equiv) in CH<sub>2</sub>Cl<sub>2</sub> (4.5 mL) was added at rt imidazole (49.3 mg, 0.72 mmol, 1.30 equiv) followed by TBSCl (101 mg, 0.67 mmol, 1.20 equiv). Upon addition of the TBSCl, a colorless precipitate formed immediately. After stirring for 3 h at rt, the reaction mixture was quenched with sat. NH<sub>4</sub>Cl (15 mL). The layers were separated and the aqueous phase was extracted with CH<sub>2</sub>Cl<sub>2</sub> (3 x 10 mL). The combined organic extracts were washed with brine, dried over MgSO<sub>4</sub> and concentrated under reduced pressure. The crude product was purified by column chromatography (hexane/EtOAc, 40:1) to furnish **105** (345 mg, 87% over two steps) as a colorless oil.

$R_f$  = 0.24 (hexane/EtOAc, 30:1)

$[\alpha]_D^{24}$  = –3.9° [ $c$  = 0.565, CHCl<sub>3</sub>]

**<sup>1</sup>H-NMR** (400.1 MHz, CDCl<sub>3</sub>):  $\delta$  = 7.69-7.62 (m, 4H), 7.47-7.35 (m, 6H), 6.28 (d,  $J$  = 9.7 Hz, 1H), 4.63 (dd,  $J$  = 2.0, 9.3 Hz, 1H), 3.70 (t,  $J$  = 6.3 Hz, 2H), 3.18 (ddd,  $J$  = 1.8, 6.7, 11.2 Hz, 1H), 2.56 (m<sub>c</sub>, 1H), 1.84-1.64 (m, 2H), 1.56-1.42 (m, 3H), 1.09-0.98 (m, 4H), 1.05 (s, 9H), 0.97-0.85 (m, 1H), 0.91 (s, 9H), 0.13 (s, 3H), 0.11 (s, 3H).

**<sup>13</sup>C-NMR** (100.6 MHz, CDCl<sub>3</sub>):  $\delta$  = 141.2, 135.6, 133.9, 129.6, 127.6, 97.2, 88.5, 77.2, 61.2, 43.4, 40.4, 39.0, 34.9, 30.8, 26.9, 25.8, 19.2, 18.1, 14.7, -3.9, -5.2.

**IR** (neat,  $\nu/\text{cm}^{-1}$ ): 3072w, 2930s, 2857m, 1472m, 1428m, 1389m, 1249m, 1173m, 1111s, 1077m, 1054w, 836s, 785s, 737m, 702s, 616w, 506m.

**HRMS (ESI)**:  $m/z$  calcd for C<sub>33</sub>H<sub>50</sub>Br<sub>2</sub>KO<sub>3</sub>Si<sub>2</sub> [M + K]<sup>+</sup>: 747.1297, found: 747.1315.

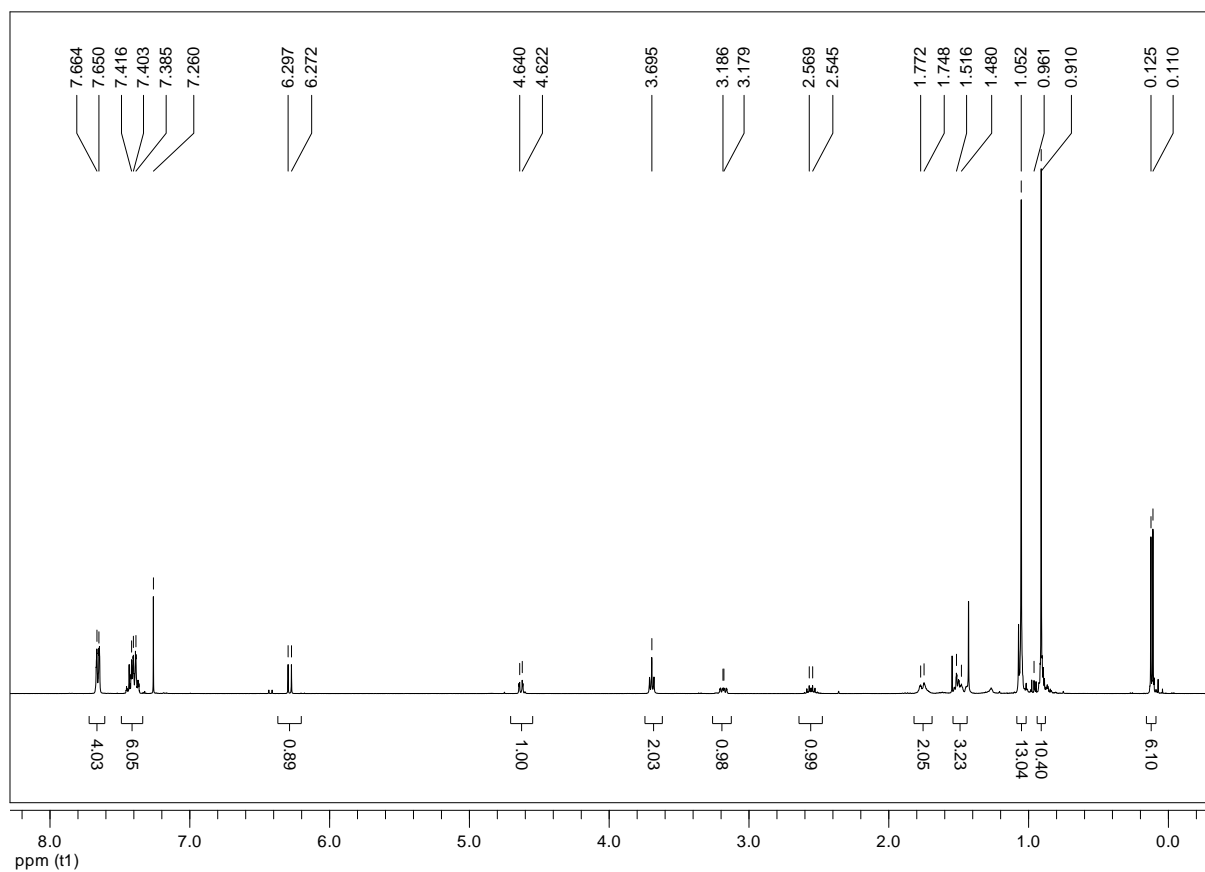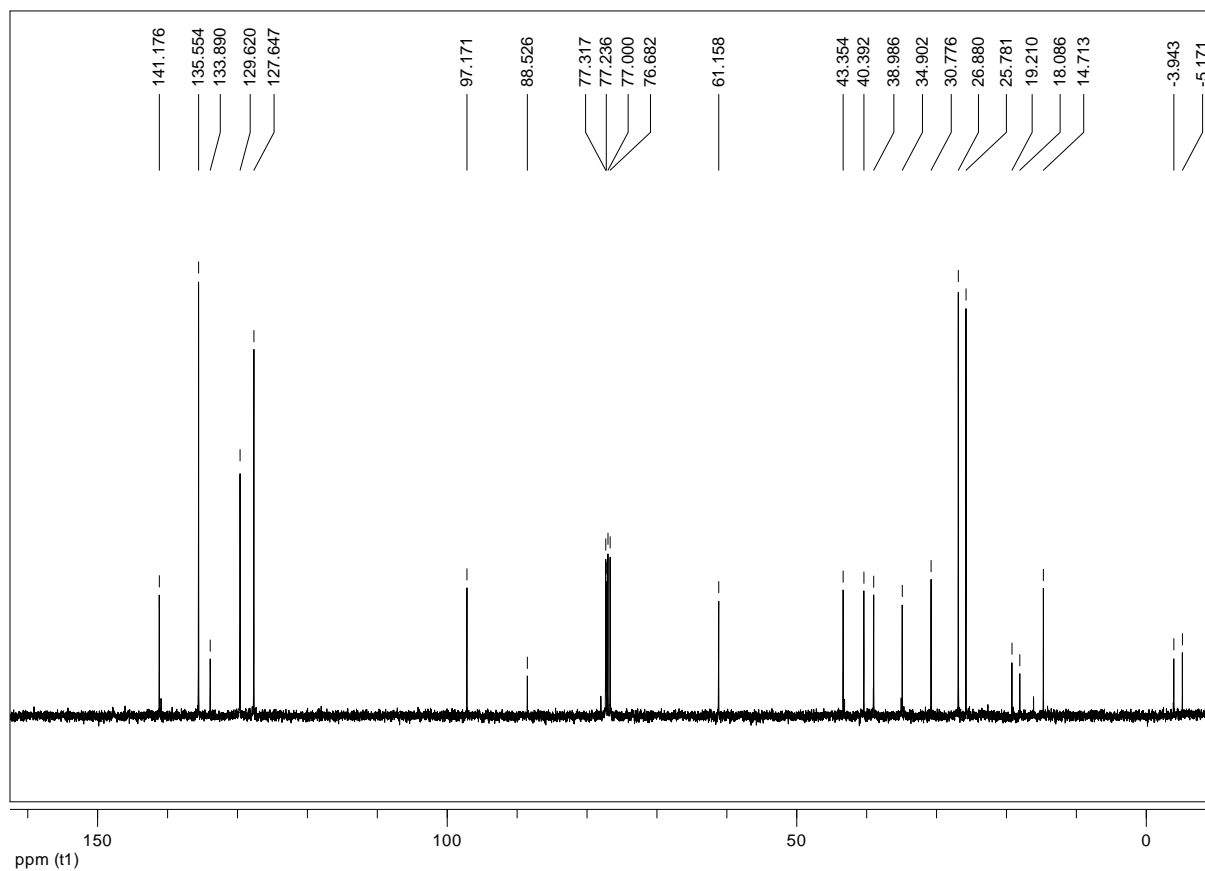

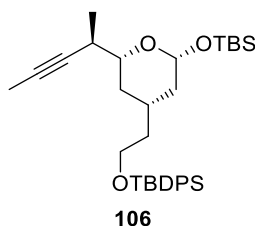

***tert*-Butyl(2-((2*R*,4*R*,6*R*)-2-(*tert*-butyldimethylsilyloxy)-6-((*R*)-pent-3-yn-2-yl)tetrahydro-2*H*-pyran-4-yl)ethoxy)diphenylsilane (**106**):** To a solution of **105** (294 mg, 0.41 mmol, 1.0 equiv) in THF (1.9 mL) was added at  $-78\text{ }^{\circ}\text{C}$  *n*-BuLi (0.85 mL, 1.37 mmol, 3.3 equiv, 1.6 M in hexane). The reaction mixture was allowed to warm to rt over 45 min, then MeI (85  $\mu\text{L}$ , 1.37 mmol, 3.3 equiv) was added rt to the yellowish reaction mixture. After stirring for 1.25 h at rt, the bright yellow reaction mixture was quenched with sat.  $\text{NH}_4\text{Cl}$  (20 mL) and diluted with  $\text{Et}_2\text{O}$  (30 mL). The layers were separated and the organic layer was extracted with  $\text{Et}_2\text{O}$  (2 x 30 mL). The combined organic extracts were washed with brine, dried over  $\text{MgSO}_4$  and concentrated *in vacuo*. The residue was purified by column chromatography (hexane/ $\text{Et}_2\text{O}$ , 70:1  $\rightarrow$  30:1) to give **106** (210 mg, 90%) as a colorless oil.

$R_f = 0.37$  (hexane/  $\text{Et}_2\text{O}$ , 30:1)

$[\alpha]_{\text{D}}^{24} = +10.8^{\circ}$  [ $c = 0.409$ ,  $\text{CHCl}_3$ ]

**$^1\text{H-NMR}$**  (400.1 MHz,  $\text{CDCl}_3$ ):  $\delta = 7.71\text{--}7.62$  (m, 4H), 7.46–7.34 (m, 6H), 4.64 (dd,  $J = 1.9$ , 9.3 Hz, 1H), 3.72 (dt,  $J = 1.8$ , 6.3 Hz, 2H), 3.13 (ddd,  $J = 1.8$ , 8.7, 10.7 Hz, 1H), 2.45 ( $m_c$ , 1H), 1.96 (d,  $J = 13.1$  Hz, 1H), 1.86–1.69 (m, 2H), 1.77 (d,  $J = 2.4$  Hz, 3H), 1.62–1.45 (m, 2H), 1.22 (d,  $J = 6.8$  Hz, 3H), 1.09–0.96 (m, 1H), 1.05 (s, 9H), 0.93–0.80 (m, 1H), 0.90 (s, 9H), 0.12 (s, 3H), 0.11 (s, 3H).

**$^{13}\text{C-NMR}$**  (100.6 MHz,  $\text{CDCl}_3$ ):  $\delta = 135.5$ , 134.0, 129.6, 127.6, 97.1, 81.1, 78.8, 77.2, 61.3, 40.4, 39.1, 35.7, 31.9, 30.8, 26.9, 25.8, 19.2, 18.2, 18.1, 3.6,  $-4.0$ ,  $-5.3$ .

**IR** (neat,  $\text{v}/\text{cm}^{-1}$ ): 2929m, 2857m, 1472w, 1428m, 1389m, 1250w, 1174m, 1158m, 1108s, 1078s, 1007m, 939w, 900w, 835s, 780s, 737m, 701s, 614m, 504s, 490m.

**HRMS (ESI):**  $m/z$  calcd for  $\text{C}_{34}\text{H}_{52}\text{NaO}_3\text{Si}_2$  [ $\text{M} + \text{Na}$ ] $^+$ : 587.3347, found: 587.3344.



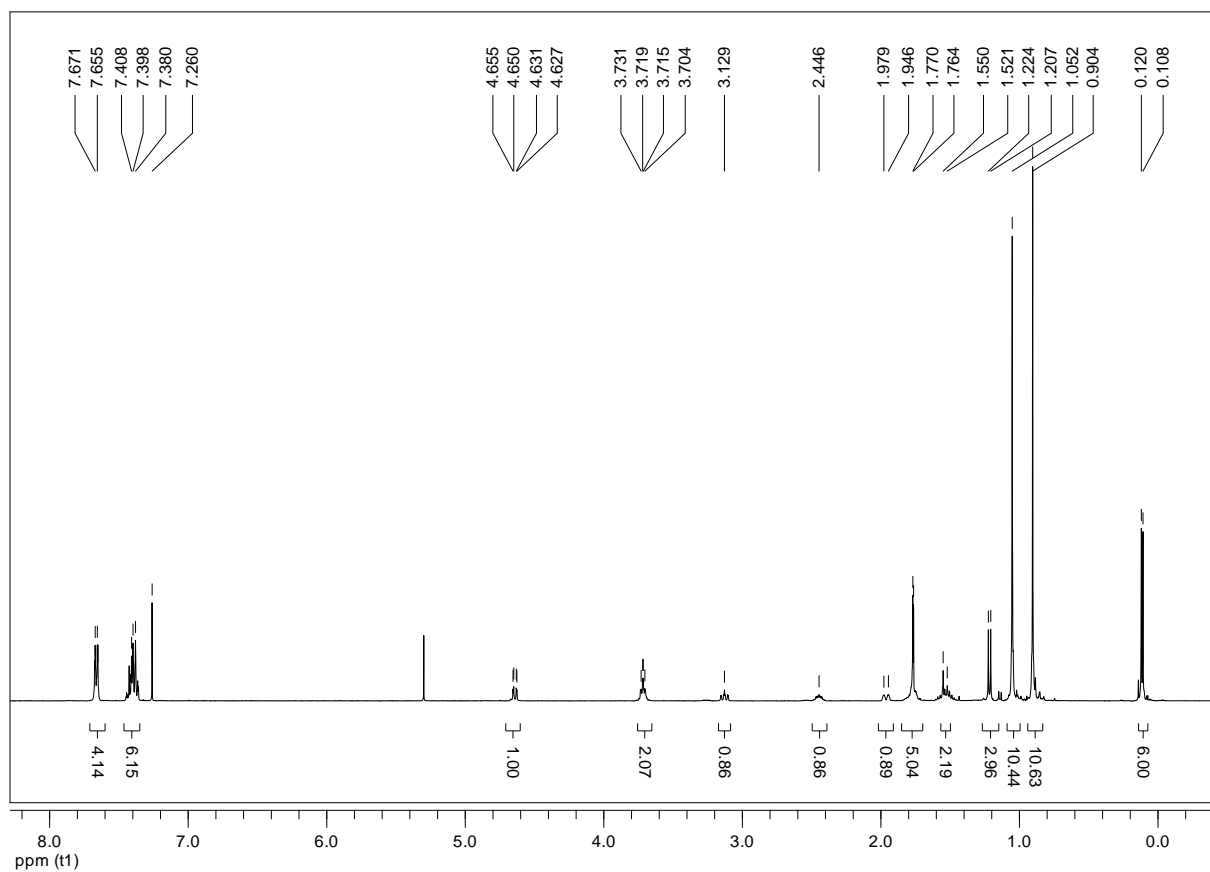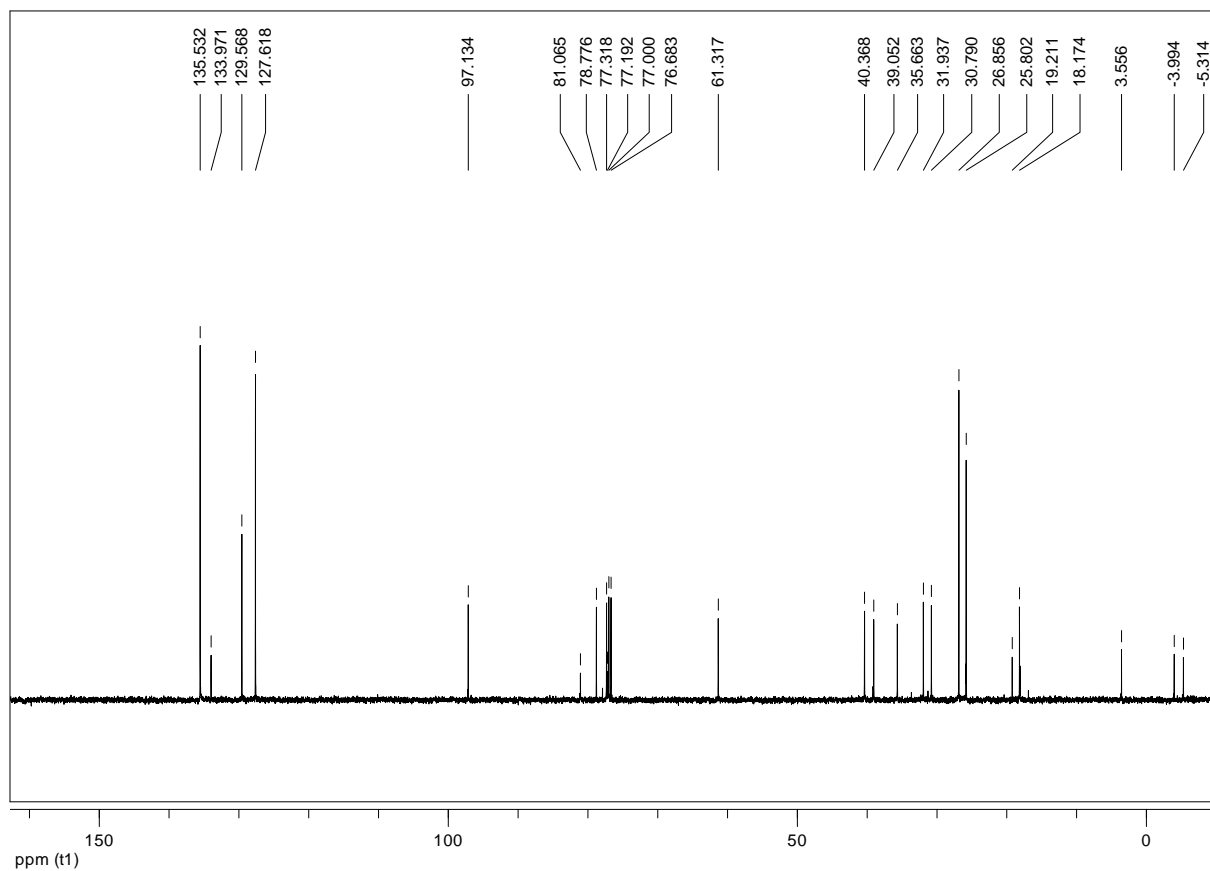

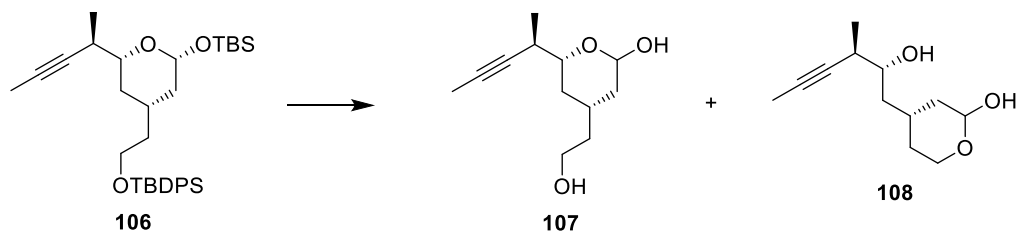

**(4*R*,6*R*)-4-(2-Hydroxyethyl)-6-((*R*)-pent-3-yn-2-yl)tetrahydro-2*H*-pyran-2-ol (107) and (4*R*)-4-((2*R*,3*R*)-2-hydroxy-3-methylhex-4-yn-1-yl)tetrahydro-2*H*-pyran-2-ol (108):** To a solution of **106** (52.4 mg, 92.8  $\mu$ mol, 1.0 equiv) in THF (0.95 mL) was added at 0 °C TBAF (0.40 mL, 0.40 mmol, 4.3 equiv, 1.0 M in THF) and AcOH (22.7  $\mu$ L, 0.40 mmol, 4.3 equiv). After stirring for 16 h at rt, the reaction mixture was diluted with EtOAc and quenched at 0 °C with sat. NaHCO<sub>3</sub> (15 mL) and EtOAc (15 mL). The layers were separated and the aqueous layer was extracted with EtOAc (2 x 15 mL). The combined organic extracts were washed with brine, dried over MgSO<sub>4</sub> and the solvent was removed under reduced pressure. The residue was purified by column chromatography (hexane/EtOAc, 1:1  $\rightarrow$  1:2  $\rightarrow$  0:1) to give **107/108** (22.7 mg, quant., 2:1) as a colorless oil.

**R<sub>f</sub>** = 0.47 (EtOAc).

**HRMS (ESI):**  $m/z$  calcd for C<sub>12</sub>H<sub>20</sub>NaO<sub>3</sub> [M + Na]<sup>+</sup>: 235.1305, found: 235.1306.

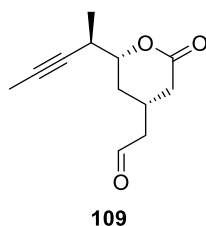

**2-((4*S*,6*R*)-2-Oxo-6-((*R*)-pent-3-yn-2-yl)tetrahydro-2H-pyran-4-yl)acetaldehyde (**109**):**

**BAIB/TEMPO:** To a solution of **107/108** (20.4 mg, 96.1  $\mu\text{mol}$ , 1.0 equiv, mixture of acetals) in  $\text{CH}_2\text{Cl}_2$  (0.65 mL) was added at rt TEMPO (2.9 mg, 19 mol%) and BAIB (67.8 mg, 210  $\mu\text{mol}$ , 2.2 equiv). The yellowish reaction mixture was stirred at rt for 45 min.  $\text{Yb}(\text{OTf})_3$  (2.3 mg, 3.9 mol%) was added at 0  $^\circ\text{C}$  and stirring was continued at rt for 45 min. The reaction mixture was diluted with  $\text{CH}_2\text{Cl}_2$  (4 mL) and quenched with sat.  $\text{Na}_2\text{S}_2\text{O}_3$  (2 mL). Brine (15 mL) was added and the aqueous layer was extracted with  $\text{CH}_2\text{Cl}_2$  (3 x 10 mL). The combined organic extracts were dried over  $\text{MgSO}_4$  and the solvent was removed under reduced pressure. The residue was purified by column chromatography (hexane/EtOAc, 1:1  $\rightarrow$  1:2) to give aldehyde **109** (12.0 mg, 62% over 2 steps) and hydroxy lactone **110** (2.6 mg, 13%, impure).

$R_f$  = 0.32 (hexane/EtOAc 1:1)

$[\alpha]_{\text{D}}^{24} = +33.4^\circ$  [ $c$  = 0.760,  $\text{CHCl}_3$ ]

**$^1\text{H-NMR}$**  (400.1 MHz,  $\text{CDCl}_3$ ):  $\delta$  = 9.77 (s, 1H), 4.11 (ddd,  $J$  = 3.0, 7.1, 11.5 Hz, 1H), 2.77 (ddd,  $J$  = 1.9, 5.6, 17.6 Hz, 1H), 2.67 (dtt,  $J$  = 2.4, 4.7, 9.4 Hz, 1H), 2.61-2.47 (m, 3H), 2.26 (mc, 1H), 2.12 (dd,  $J$  = 10.4, 17.5 Hz, 1H), 1.77 (d,  $J$  = 2.4 Hz, 3H), 1.36 (mc, 1H), 1.22 (d,  $J$  = 7.0 Hz, 3H).

**$^{13}\text{C-NMR}$**  (100.6 MHz,  $\text{CDCl}_3$ ):  $\delta$  = 199.6, 170.0, 82.4, 78.9, 78.4, 49.7, 35.8, 32.2, 31.9, 25.7, 17.4, 3.5.

**IR** (neat,  $\text{v}/\text{cm}^{-1}$ ): 2921m, 2857w, 2729w, 1722s, 1444m, 1384m, 1359, 1236s, 1185m, 1081s, 1029m, 1010m, 968w.

**HRMS (ESI):**  $m/z$  calcd for  $\text{C}_{12}\text{H}_{16}\text{NaO}_3$  [ $\text{M} + \text{Na}$ ] $^+$ : 231.0992, found: 231.0991.

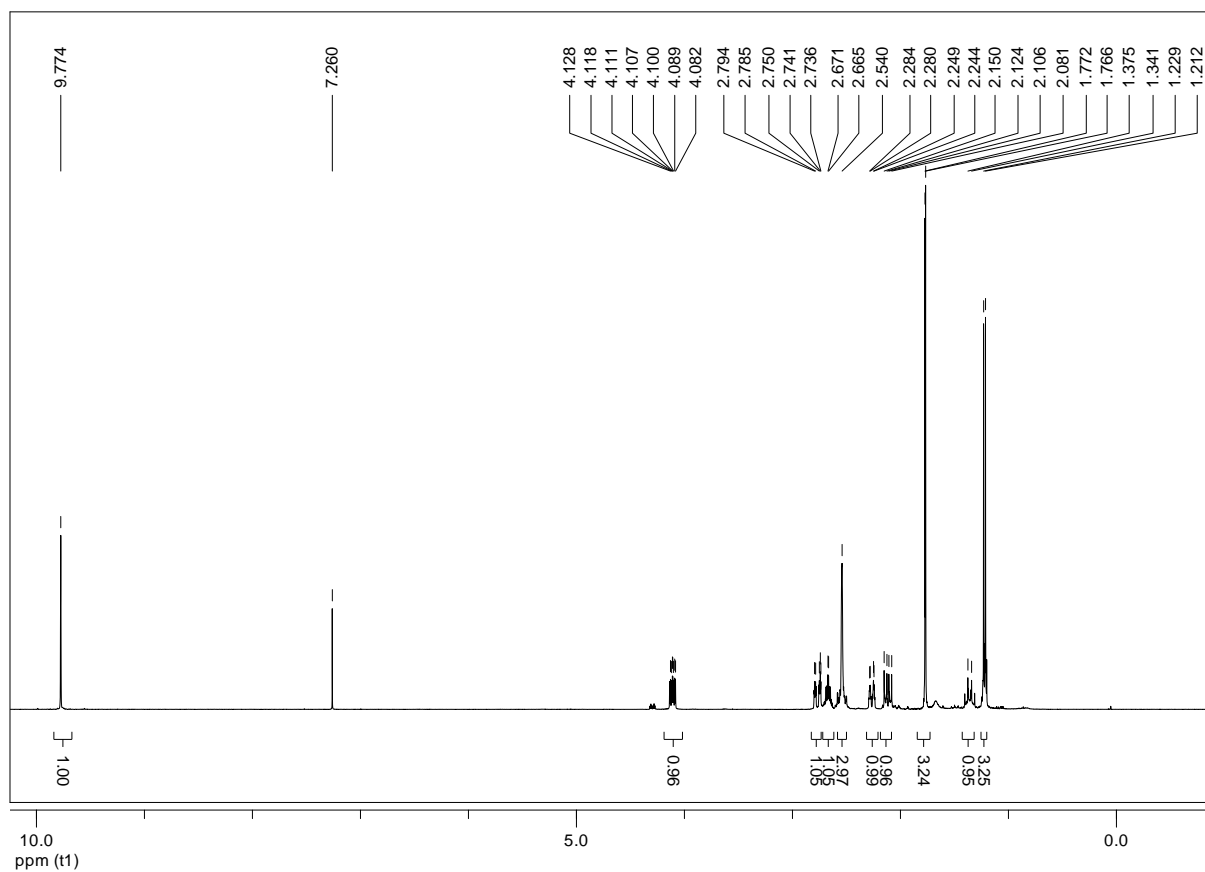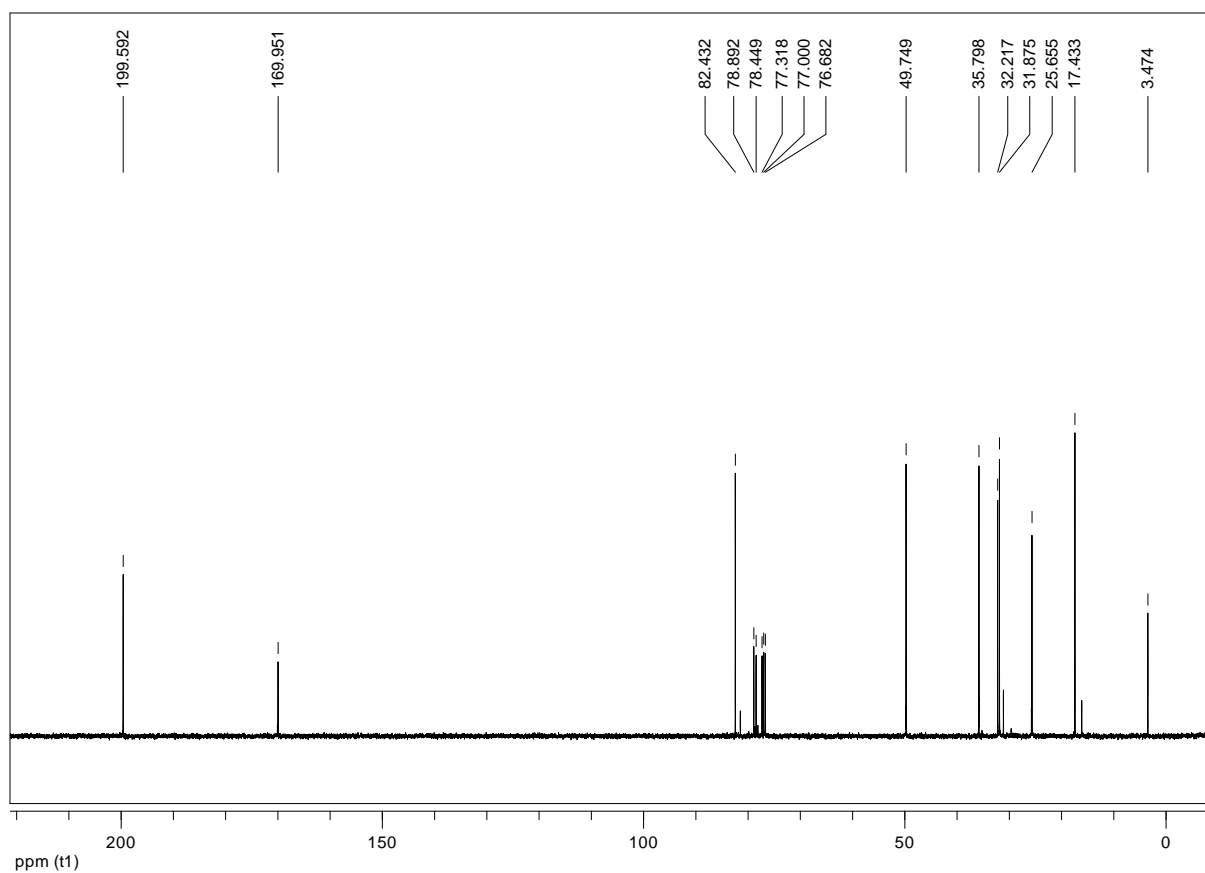

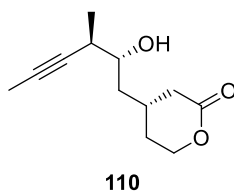

$R_f = 0.16$  (hexane/EtOAc 1:1)

**$^1\text{H-NMR}$**  (400.1 MHz,  $\text{CDCl}_3$ ):  $\delta = 4.43$  (ddd,  $J = 3.9, 4.9, 11.4$  Hz, 1H), 4.28 (ddd,  $J = 3.7, 10.8, 11.4$  Hz, 1H), 3.60 ( $m_c$ , 1H), 2.76 ( $m_c$ , 1H), 2.56 ( $m_c$ , 1H), 2.37-2.16 (m, 2H), 2.09-1.98 (m, 1H), 1.81 (d,  $J = 2.4$  Hz, 3H), 1.71 (d,  $J = 6.3$  Hz, 1H), 1.60-1.44 (m, 3H), 1.13 (d,  $J = 7.0$  Hz, 3H).

**HRMS (ESI)**:  $m/z$  calcd for  $\text{C}_{12}\text{H}_{18}\text{NaO}_3$   $[\text{M} + \text{Na}]^+$ : 233.1148, found: 233.1151.

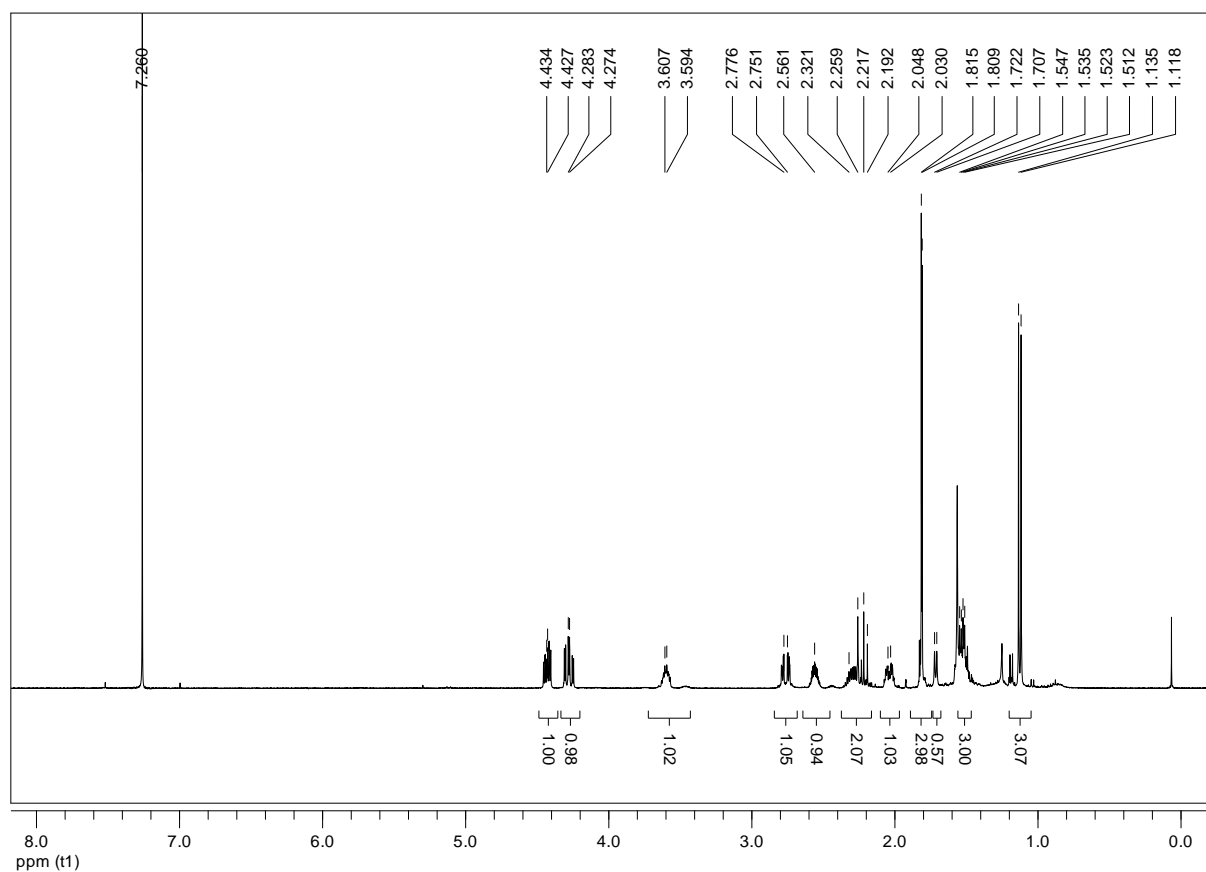

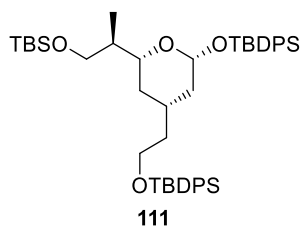

***tert*-Butyl(((2*R*,4*R*,6*R*)-6-((*R*)-1-(*tert*-butyldimethylsilyloxy)propan-2-yl)-4-(2-((*tert*-butyldiphenylsilyl)oxy)ethyl)tetrahydro-2*H*-pyran-2-yl)oxy)diphenylsilane (**111**):** To a mechanically stirring solution of **57** (10.7 g, 33.8 mmol, 1.0 equiv) in 380 mL CH<sub>2</sub>Cl<sub>2</sub> was added dropwise at -78 °C DIBAL (61.0 mL, 73.2 mmol, 2.2 equiv, 1.2 M in toluene) over 30 min. After the addition was complete, a thick colorless precipitate was formed. After stirring for 2 h at -78 °C, the reaction mixture was quenched by addition of sat. *Rochelle* salt (400 mL) and stirred over night at rt. The layers were separated and the aqueous layer was extracted with CH<sub>2</sub>Cl<sub>2</sub> (2 x 150 mL). The combined organic extracts were dried over MgSO<sub>4</sub> and concentrated under reduced pressure. The crude hemiacetal (11.9 g) was used for the next step without further purification. *R<sub>f</sub>* = 0.59 (EtOAc).

A stirred solution of the above hemiacetal (11.9 g, crude) in dry CH<sub>2</sub>Cl<sub>2</sub> (275 mL) was treated at rt with TBDPSCl (21.0 mL, 81.2 mmol, 2.4 equiv) followed by imidazole (5.85 g, 85.9 mmol, 2.5 equiv). After stirring at rt for 2.5 h, the reaction mixture was quenched with brine (200 mL) and diluted with CH<sub>2</sub>Cl<sub>2</sub> (50 mL). The layers were separated and the aqueous layer was extracted with CH<sub>2</sub>Cl<sub>2</sub> (3 x 100 mL). The combined organic extracts were dried over MgSO<sub>4</sub> and concentrated *in vacuo*. The residue was purified by column chromatography (hexane/Et<sub>2</sub>O, 60:1 → 30:1) to give **111** (24.7 g, 1.4% wt/wt CH<sub>2</sub>Cl<sub>2</sub>, 24.3 g, 90% over 2 steps, single isomer) as a colorless oil.

*R<sub>f</sub>* = 0.45 (hexane/Et<sub>2</sub>O, 30:1)

[ $\alpha$ ]<sub>D</sub><sup>24</sup> = +3.0° [*c* = 0.415, CHCl<sub>3</sub>]

**<sup>1</sup>H-NMR** (400.1 MHz, CDCl<sub>3</sub>):  $\delta$  = 7.84-7.60 (m, 8H), 7.49-7.23 (m, 12H), 4.63 (d, *J* = 9.1 Hz, 1H), 3.69 (t, *J* = 6.2 Hz, 2H), 3.45 (dd, *J* = 5.2, 9.8 Hz, 1H), 3.35 (dd, *J* = 6.9, 9.6 Hz, 1H), 3.15 (dd, *J* = 4.7, 11.1 Hz, 1H), 1.82 (d, *J* = 12.5 Hz, 1H), 1.71-1.56 (m, 2H), 1.52 (dd, *J* = 6.4, 12.9 Hz, 2H), 1.42 (d, *J* = 12.9 Hz, 1H), 1.26-1.13 (m, 1H), 1.10 (s, 9H), 1.06 (s, 9H), 1.00-0.92 (m, 1H), 0.90 (d, *J* = 7.0 Hz, 3H), 0.87 (s, 9H), -0.02 (s, 6H).

**$^{13}\text{C}$ -NMR** (100.6 MHz,  $\text{CDCl}_3$ ):  $\delta$  = 135.8, 135.6, 135.5, 134.0, 133.9, 129.6, 129.5, 129.4, 127.6, 127.5, 127.3, 97.0, 76.1, 65.7, 61.4, 40.8, 40.6, 39.3, 34.7, 31.0, 26.9, 26.8, 25.9, 19.2, 19.1, 18.2, 12.3, -5.4.

**IR** (neat,  $\text{v}/\text{cm}^{-1}$ ): 3072w, 2955m, 2930m, 2857m, 1472m, 1428m, 1389m, 1362w, 1264m, 1106s, 836m, 823m, 737s, 700s, 613m, 504s, 489s.

**HRMS (ESI)**:  $m/z$  calcd for  $\text{C}_{48}\text{H}_{74}\text{NO}_4\text{Si}_3$  [ $\text{M} + \text{NH}_4$ ] $^{+}$ : 812.4920, found: 812.4921.

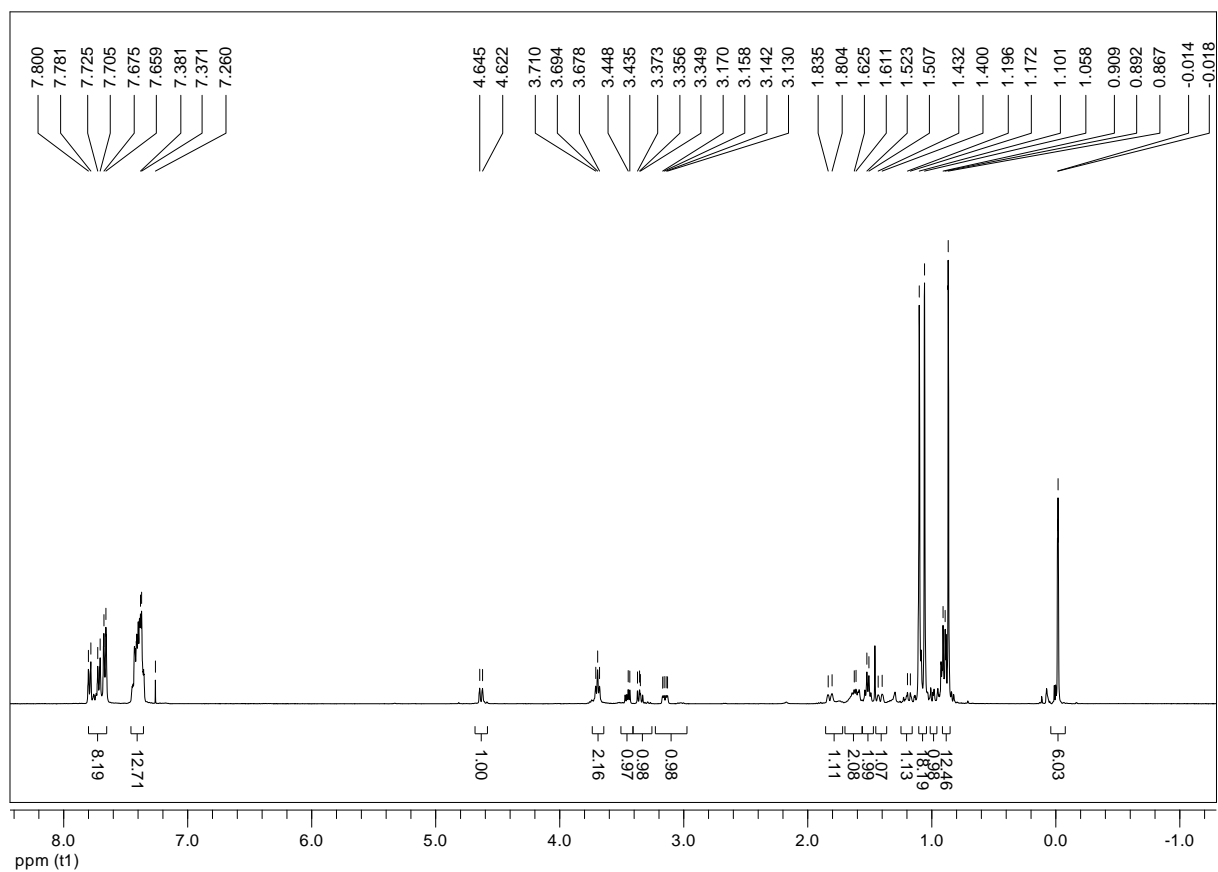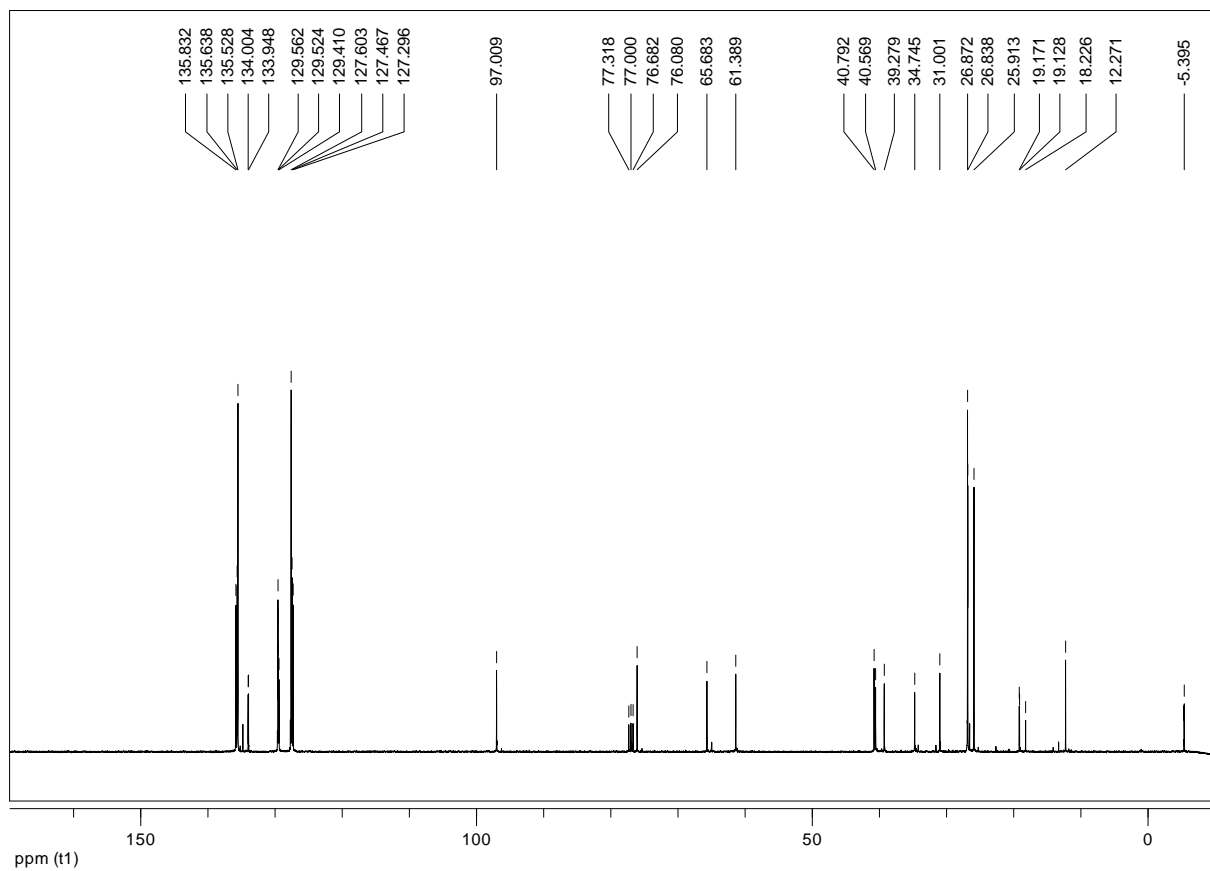



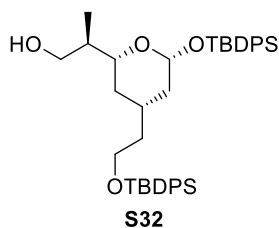

**(R)-2-((2R,4R,6R)-6-((*tert*-Butyldiphenylsilyl)oxy)-4-(2-((*tert*-butyldiphenylsilyl)oxy)ethyl)tetrahydro-2H-pyran-2-yl)propan-1-ol (S32):** To a solution of **111** (1.74 g, 2.19 mmol, 1.0 equiv) in THF/water (4:1, 22 mL) was added at rt sodium periodate (2.81 g, 13.1 mmol, 6.0 equiv). After stirring for 16 h at rt, the reaction mixture was quenched with water (50 mL) and diluted with CH<sub>2</sub>Cl<sub>2</sub> (30 mL). The layers were separated and the aqueous layer was extracted with CH<sub>2</sub>Cl<sub>2</sub> (2 x 50 mL). The combined organic extracts were dried over MgSO<sub>4</sub> and concentrated under reduced pressure. The residue was purified by column chromatography (hexane/EtOAc, 10:1 → 5:1 → 2:1) to give **S32** (1.30 g, 87%, 3% wt/wt CH<sub>2</sub>Cl<sub>2</sub>/EtOAc) as a colorless oil.

**R<sub>f</sub>** = 0.20 (hexane/EtOAc, 10:1)

**[α]<sub>D</sub><sup>24</sup>** = +0.1° [*c* = 0.420, CHCl<sub>3</sub>].

**<sup>1</sup>H-NMR** (400.1 MHz, CDCl<sub>3</sub>): δ = 7.79-7.60 (m, 8H), 7.47-7.32 (m, 12H), 4.60 (dd, *J* = 2.1, 9.3 Hz, 1H), 3.68 (dd, *J* = 0.9, 6.2 Hz, 2H), 3.39 (dd, *J* = 7.9, 10.7 Hz, 1H), 3.32 (dd, *J* = 4.6, 10.8 Hz, 1H), 3.22 (ddd, *J* = 1.9, 3.6, 11.5 Hz, 1H), 1.91-1.78 (m, 2H), 1.76-1.56 (m, 2H), 1.51 (q, *J* = 6.4 Hz, 2H), 1.36-1.28 (m, 1H), 1.25-1.14 (m, 1H), 1.07 (s, 9H), 1.04 (s, 9H), 1.06-0.94 (m, 1H), 0.78 (d, *J* = 7.1 Hz, 3H).

**<sup>13</sup>C-NMR** (100.6 MHz, CDCl<sub>3</sub>): δ = 135.7, 135.6, 135.5, 133.9, 133.8, 133.7, 129.7, 129.6, 127.6, 127.4, 97.2, 77.0, 65.6, 61.3, 40.4, 39.2, 39.0, 33.0, 30.9, 26.9, 26.8, 19.2, 19.0, 11.5.

**IR** (neat, ν/cm<sup>-1</sup>): 3427br, 3071w, 2930m, 2857m, 1472m, 1428m, 1389m, 1110s, 1026m, 938w, 902w, 822m, 804m, 739s, 701s, 613s, 505s.

**HRMS (ESI):** *m/z* calcd for C<sub>42</sub>H<sub>56</sub>NaO<sub>4</sub>Si<sub>2</sub> [*M* + Na]<sup>+</sup>: 703.3609, found: 703.3608.

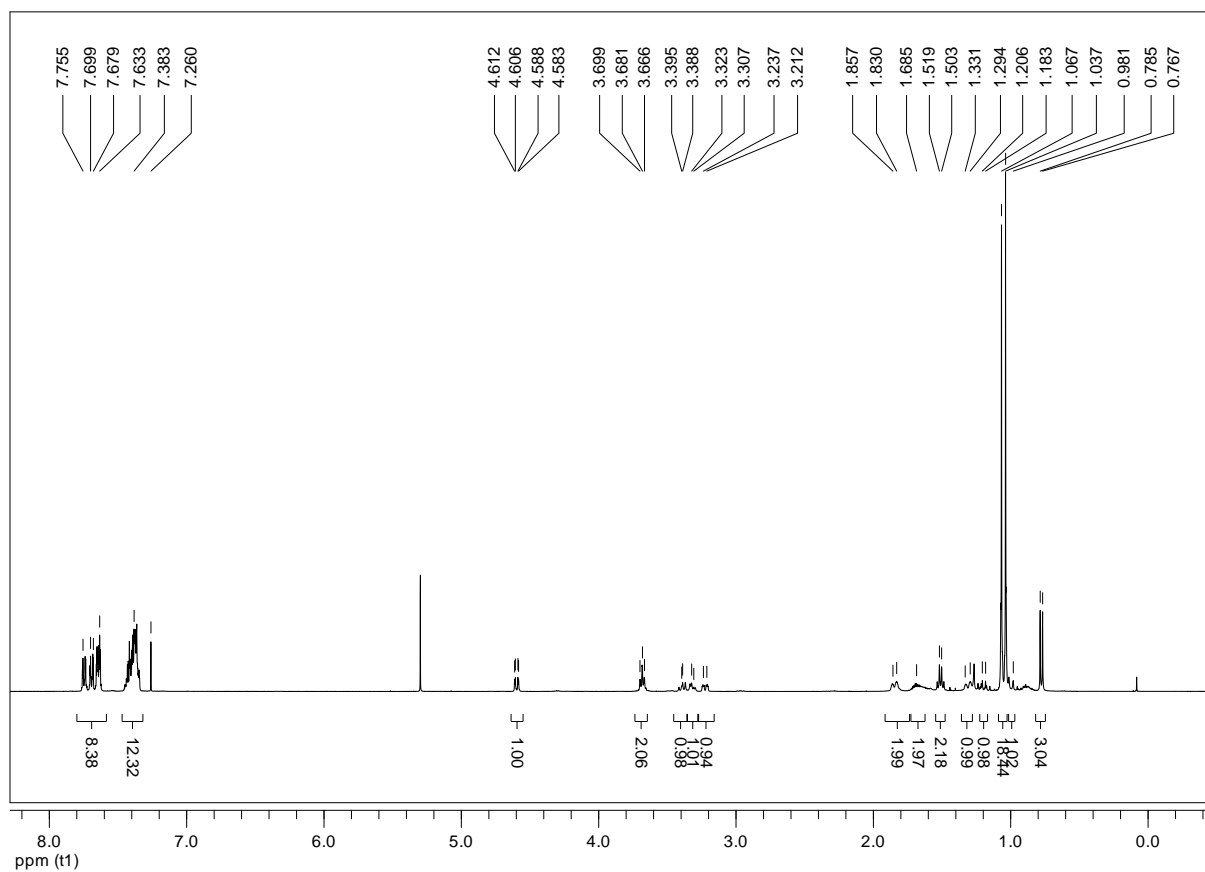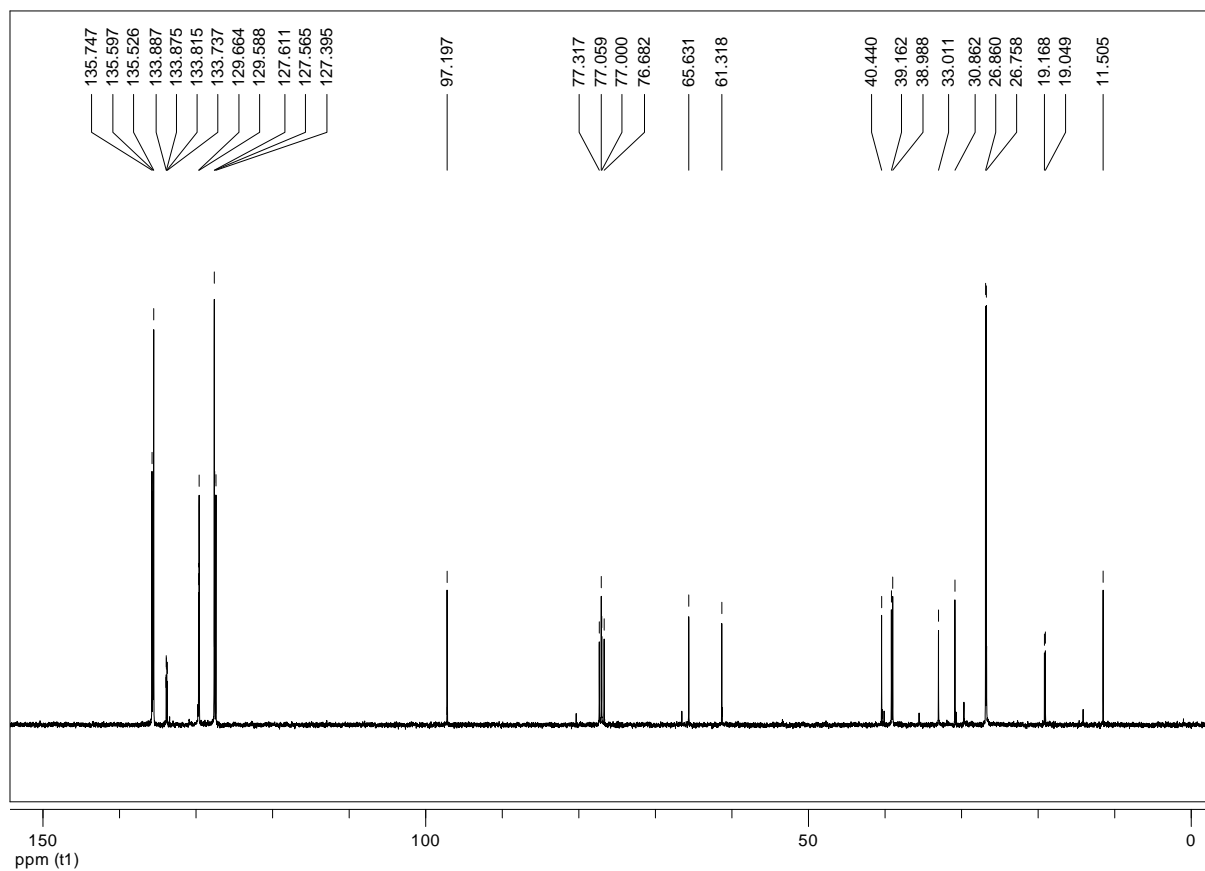

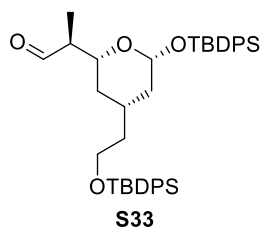

**(S)-2-((2R,4R,6R)-6-((tert-Butyldiphenylsilyl)oxy)-4-(2-((tert-butyldiphenylsilyl)oxy)ethyl)tetrahydro-2H-pyran-2-yl)propanal (S33):**

**Dess-Martin oxidation:** To a solution of **32** (90.2 mg, 0.13 mmol, 1.0 equiv) in CH<sub>2</sub>Cl<sub>2</sub> (2.6 mL) was added at 0 °C *Dess-Martin* periodinane (67.4 mg, 0.16 mmol, 1.2 equiv) in one portion. After stirring for 1.5 h at 0 °C, sat. Na<sub>2</sub>S<sub>2</sub>O<sub>3</sub> (12 mL), sat. NaHCO<sub>3</sub> (12 mL) and Et<sub>2</sub>O (25 mL) were added to the reaction mixture. The layers were separated and the aqueous layer was extracted with Et<sub>2</sub>O (2 x 15 mL). The combined organic extracts were dried over MgSO<sub>4</sub>, filtered and concentrated under reduced pressure. The residue was purified by column chromatography (hexane/EtOAc, 10:1) to give **S33** (87.2 mg, 9% wt/wt CH<sub>2</sub>Cl<sub>2</sub>, 79.3 mg, 88%) as a colorless oil.

**Swern oxidation:** To a solution of oxalyl chloride (3.35 mL, 39.6 mmol, 1.5 equiv) in CH<sub>2</sub>Cl<sub>2</sub> (300 mL) at –78 °C was added dropwise a solution of DMSO (5.63 mL, 79.3 mmol, 3.0 equiv) in CH<sub>2</sub>Cl<sub>2</sub> (100 mL). After stirring at –78 °C for 20 min, a solution of **S32** (18.4 g, 2% wt/wt CH<sub>2</sub>Cl<sub>2</sub>/EtOAc, 18.0 g, 26.4 mmol, 1.0 equiv) in CH<sub>2</sub>Cl<sub>2</sub> (180 mL) was added dropwise over 1 h. The resultant cloudy mixture was stirred at –78 °C for 1.5 h, and then TEA (14.7 mL, 106 mmol, 4.0 equiv) was added slowly and the reaction mixture was allowed to warm to room temperature (1.5 h). The reaction was quenched with water (350 mL), and the layers were separated. The aqueous phase was extracted with CH<sub>2</sub>Cl<sub>2</sub> (3 x 60 mL) and the combined organic phases were dried over MgSO<sub>4</sub>, filtered and concentrated *in vacuo*. The crude product was purified by column chromatography (hexane/EtOAc, 10:1) to afford **S33** (17.81 g, 3% wt/wt CH<sub>2</sub>Cl<sub>2</sub>/EtOAc, 17.26 g, 96%) as a colorless oil.

**R<sub>f</sub>** = 0.58 (hexane/EtOAc, 10:1)

**[α]<sub>D</sub><sup>24</sup>** = +16.4° [*c* = 0.540, CHCl<sub>3</sub>]

**<sup>1</sup>H-NMR** (400.1 MHz, CDCl<sub>3</sub>): δ = 9.42 (d, *J* = 0.9 Hz, 1H), 7.75-7.58 (m, 8H), 7.47-7.30 (m, 12H), 4.62 (dd, *J* = 2.0, 9.3 Hz, 1H), 3.67 (dt, *J* = 2.6, 6.2 Hz, 2H), 3.46 (ddd, *J* = 1.7, 4.7, 11.4 Hz, 1H), 2.23 (m<sub>c</sub>, 1H), 1.85 (d, *J* = 12.7 Hz, 1H), 1.68 (m<sub>c</sub>, 1H), 1.49 (q, *J* = 6.4 Hz, 2H), 1.39 (d, *J* = 12.9 Hz, 1H), 1.25-1.13 (m, 1H), 1.06 (s, 9H), 1.03 (s, 9H), 1.00 (d, *J* = 7.1 Hz, 3H), 0.99-0.86 (m, 1H).

**<sup>13</sup>C-NMR** (100.6 MHz, CDCl<sub>3</sub>): δ = 204.2, 135.8, 135.6, 135.5, 133.8, 133.7, 129.6, 127.6, 127.5, 127.3, 97.0, 74.4, 61.1, 50.7, 40.2, 39.0, 34.2, 30.7, 26.9, 26.8, 19.2, 19.1, 8.6.

**IR** (neat, v/cm<sup>-1</sup>): 3071w, 2932m, 2858m, 1727m, 1469w, 1428m, 1389m, 1171w, 1109s, 1002w, 903w, 822m, 739m, 703s, 612m, 506s.

**HRMS (ESI)**: *m/z* calcd for C<sub>42</sub>H<sub>54</sub>NaO<sub>4</sub>Si<sub>2</sub> [M + Na]<sup>+</sup>: 701.3453, found: 701.3455.

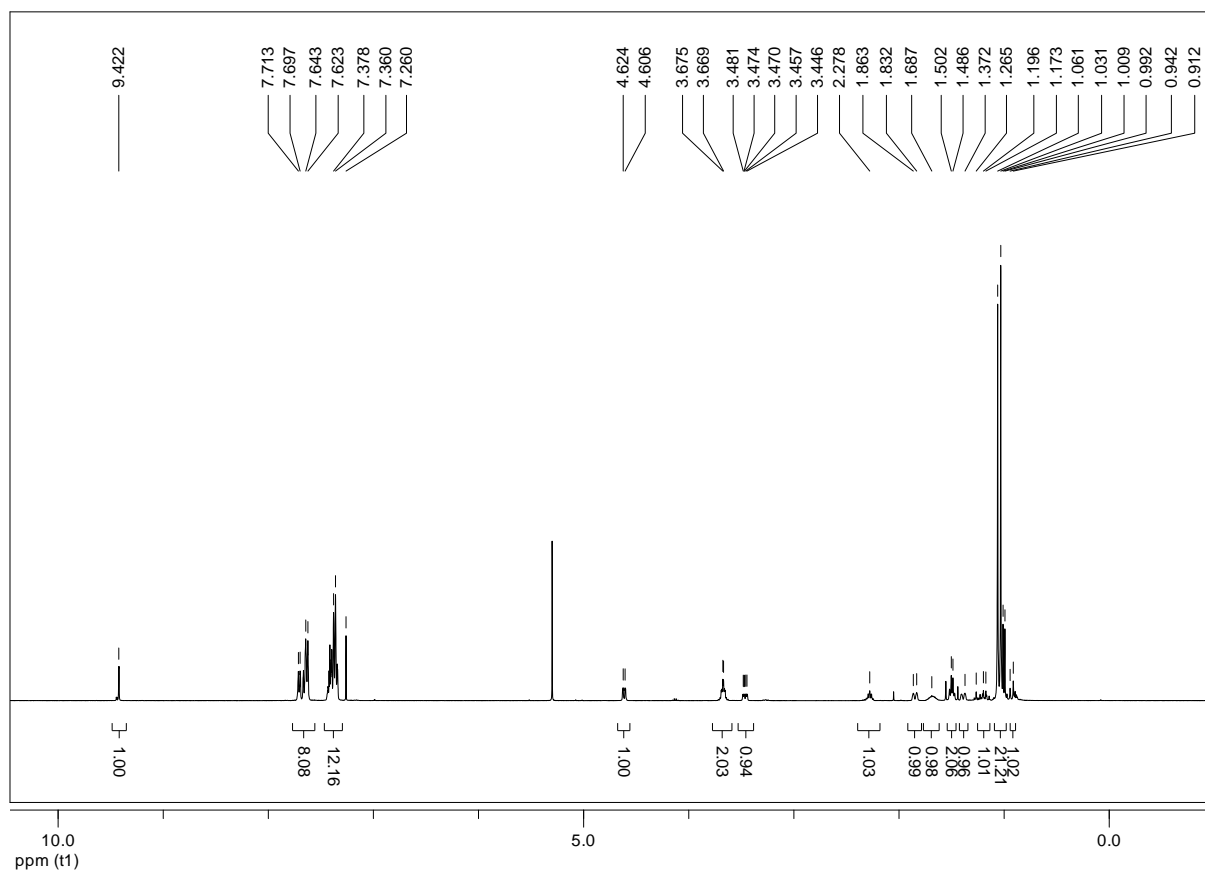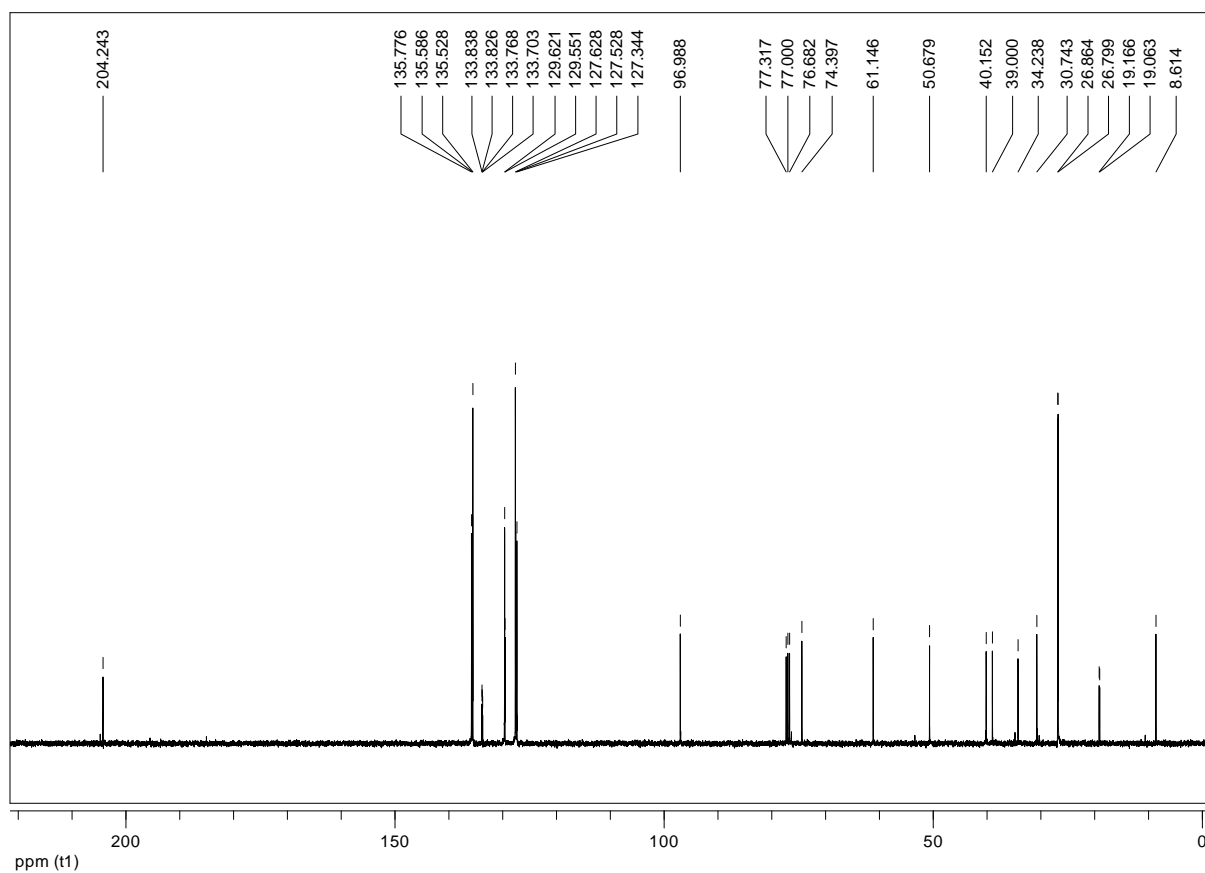

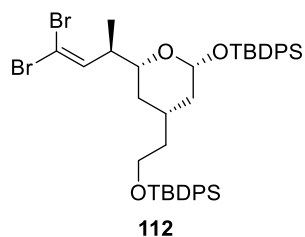

***tert*-Butyl(2-((2*R*,4*R*,6*R*)-2-((*tert*-butyldiphenylsilyl)oxy)-6-((*R*)-4,4-dibromobut-3-en-2-yl)tetrahydro-2*H*-pyran-4-yl)ethoxy)diphenylsilane (**112**):** To a solution of  $\text{CBr}_4$  (69.7 mg, 0.21 mmol, 1.8 equiv) in  $\text{CH}_2\text{Cl}_2$  (0.5 mL) was added at 0 °C triphenylphosphine (110 mg, 0.42 mmol, 3.6 equiv). After stirring for a few minutes at 0 °C, the yellow reaction mixture was cooled to –78 °C and a solution of **S33** (79.3 mg, 0.12 mmol, 1.0 equiv) in  $\text{CH}_2\text{Cl}_2$  (3 x 0.5 mL) was added dropwise. After stirring for 1 h at the same temperature, the reaction mixture was diluted with sat.  $\text{NH}_4\text{Cl}$  (10 mL) and  $\text{CH}_2\text{Cl}_2$  (10 mL). The layers were separated and the aqueous layer was extracted with  $\text{CH}_2\text{Cl}_2$  (2 x 15 mL). The combined organic extracts were dried over  $\text{MgSO}_4$ , filtered and concentrated under reduced pressure. The crude product was purified by column chromatography (hexane/EtOAc, 30:1 → 20:1) to give **112** (97.5 mg, 1.2% wt/wt  $\text{CH}_2\text{Cl}_2$ , 96.3 mg, 99%) as a colorless oil.

$R_f$  = 0.62 (hexane/EtOAc, 20:1)

$[\alpha]_{\text{D}}^{24} = +5.2^\circ$  [ $c$  = 0.535,  $\text{CHCl}_3$ ]

**$^1\text{H-NMR}$**  (400.1 MHz,  $\text{CDCl}_3$ ):  $\delta$  = 7.83–7.60 (m, 8H), 7.50–7.32 (m, 12H), 6.07 (d,  $J$  = 9.6 Hz, 1H), 4.59 (d,  $J$  = 8.9 Hz, 1H), 3.68 (t,  $J$  = 5.9 Hz, 2H), 3.00 (dd,  $J$  = 6.0, 10.3 Hz, 1H), 2.47 (m, 1H), 1.83 (d,  $J$  = 12.6 Hz, 1H), 1.63 (brs, 1H), 1.57–1.43 (m, 2H), 1.38 (d,  $J$  = 12.7 Hz, 1H), 1.23–1.14 (m, 1H), 1.11 (s, 9H), 1.05 (s, 9H), 0.99–0.87 (m, 1H), 0.93 (d,  $J$  = 6.7 Hz, 3H).

**$^{13}\text{C-NMR}$**  (100.6 MHz,  $\text{CDCl}_3$ ):  $\delta$  = 141.3, 135.8, 135.6, 135.5, 133.9, 133.7, 129.7, 129.6, 129.5, 127.6, 127.4, 97.1, 88.1, 76.8, 61.2, 43.2, 40.3, 39.0, 34.8, 30.7, 26.9, 26.8, 19.2, 19.1, 14.1.

**IR** (neat,  $\text{v}/\text{cm}^{-1}$ ): 3071w, 2932m, 2858m, 1469w, 1428m, 13893, 1110s, 1078s, 1003w, 823m, 739m, 703s, 612m, 505s.

**HRMS (ESI)**:  $m/z$  calcd for  $\text{C}_{43}\text{H}_{54}\text{Br}_2\text{KO}_3\text{Si}_2$  [ $\text{M} + \text{K}$ ] $^+$ : 871.1610, found: 871.1612.

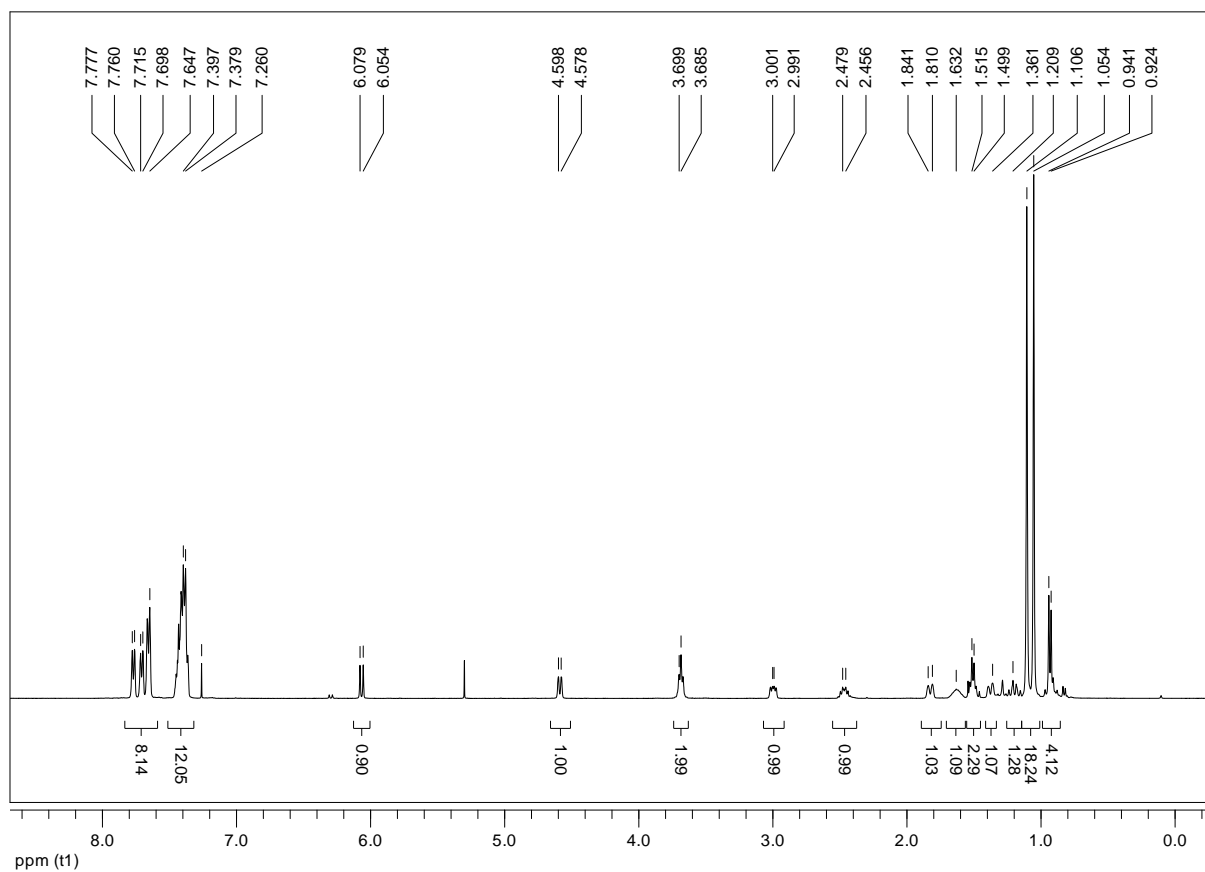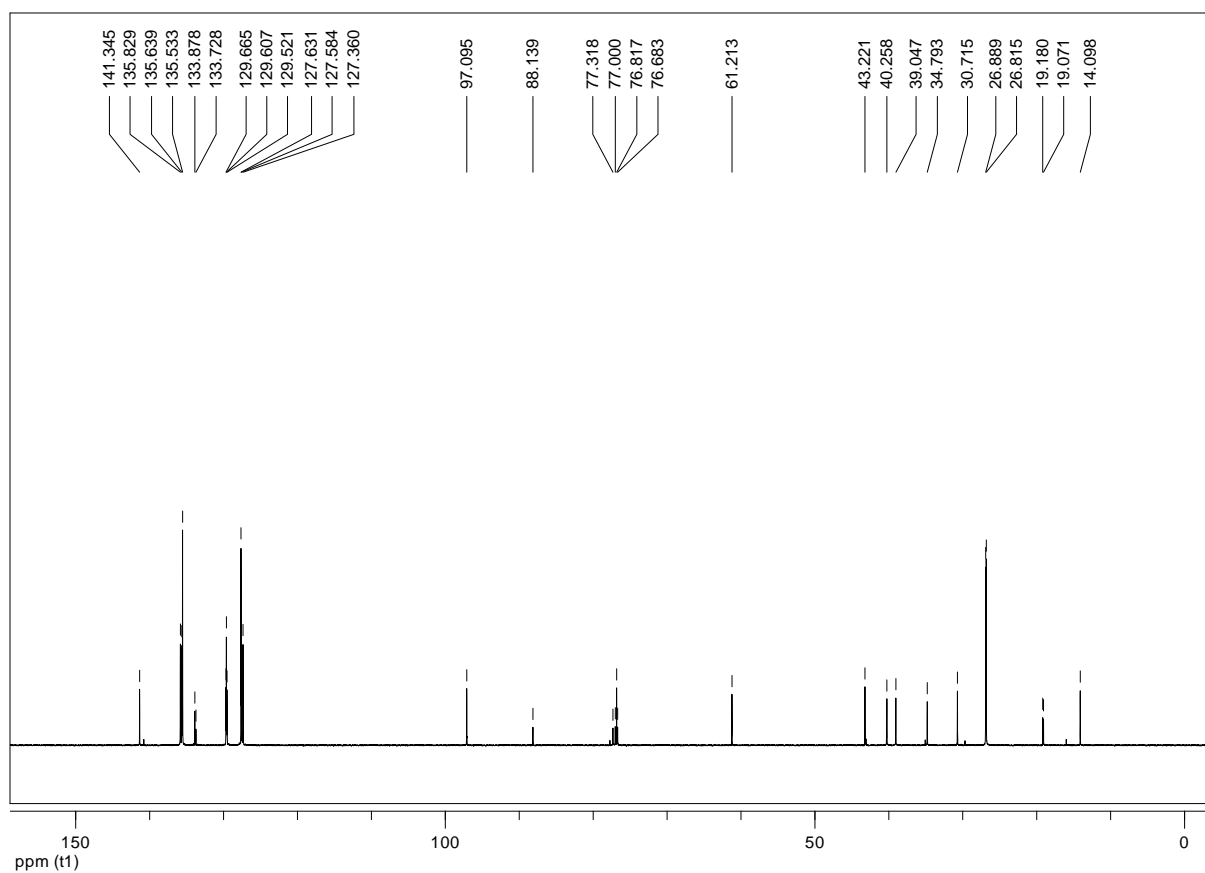

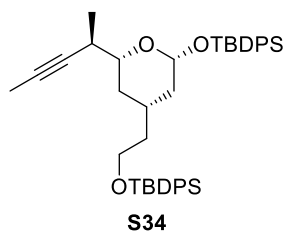

**tert-Butyl(2-((2R,4R,6R)-2-((tert-butyldiphenylsilyl)oxy)-6-((R)-pent-3-yn-2-yl)tetrahydro-2H-pyran-4-yl)ethoxy)diphenylsilane (S34):** To a solution of **112** (3.55 g, 2% wt/wt CH<sub>2</sub>Cl<sub>2</sub>/EtOAc, 3.48 g, 1.46 mmol, 1.0 equiv) in THF (24 mL) was added at -78 °C *n*-BuLi (8.8 mL, 14.1 mmol, 3.4 equiv, 1.6 M in hexane). The reaction mixture was allowed to warm to rt over night in the cooling bath (over 16 h); then MeI (0.88 mL, 14.1 mmol, 3.4 equiv) was added at rt to the yellow reaction mixture. After stirring for 3.5 h at rt, the reaction mixture was poured into a sat. solution of NH<sub>4</sub>Cl (200 mL) and was diluted with Et<sub>2</sub>O (100 mL). The layers were separated and the organic layer was extracted with Et<sub>2</sub>O (2 x 80 mL). The combined organic extracts were dried over MgSO<sub>4</sub> and concentrated *in vacuo*. The residue was purified by column chromatography (hexane/Et<sub>2</sub>O, 70:1 → 30:1) to give **S34** (2.75 g, 2.2% wt/wt CH<sub>2</sub>Cl<sub>2</sub>, 2.69 g, 94%) as a colorless oil.

**R<sub>f</sub>** = 0.44 (hexane/EtOAc, 30:1)

**[α]<sub>D</sub><sup>24</sup>** = +10.3° [*c* = 0.580, CHCl<sub>3</sub>]

**<sup>1</sup>H-NMR** (400.1 MHz, CDCl<sub>3</sub>): δ = 7.86-7.57 (m, 8H), 7.47-7.29 (m, 12H), 4.60 (dd, *J* = 2.0, 9.3 Hz, 1H), 3.68 (t, *J* = 6.3 Hz, 2H), 2.93 (mc, 1H), 2.40 (mc, 1H), 1.93 (d, *J* = 13.0 Hz, 1H), 1.80 (d, *J* = 12.7 Hz, 1H), 1.74 (d, *J* = 2.4 Hz, 3H), 1.63 (mc, 1H), 1.51 (mc, 2H), 1.27-1.13 (m, 1H), 1.09 (s, 9H), 1.08 (mc, 3H), 1.04 (s, 9H), 0.93-0.79 (m, 1H).

**<sup>13</sup>C-NMR** (100.6 MHz, CDCl<sub>3</sub>): δ = 135.8, 135.6, 135.5, 134.0, 133.9, 133.7, 129.6, 129.5, 127.6, 127.5, 127.4, 97.1, 81.0, 78.7, 77.1, 61.4, 40.3, 39.1, 35.7, 32.0, 30.7, 26.9, 26.8, 19.2, 19.1, 18.1, 3.5.

**IR** (neat, ν/cm<sup>-1</sup>): 3071w, 2931m, 2857m, 1472w, 1428m, 1389w, 1111s, 1078m, 1008w, 823m, 700s, 615m, 507s.

**HRMS (ESI):** *m/z* calcd for C<sub>44</sub>H<sub>56</sub>NaO<sub>3</sub>Si<sub>2</sub> [*M* + Na]<sup>+</sup>: 711.3660, found: 711.3670.



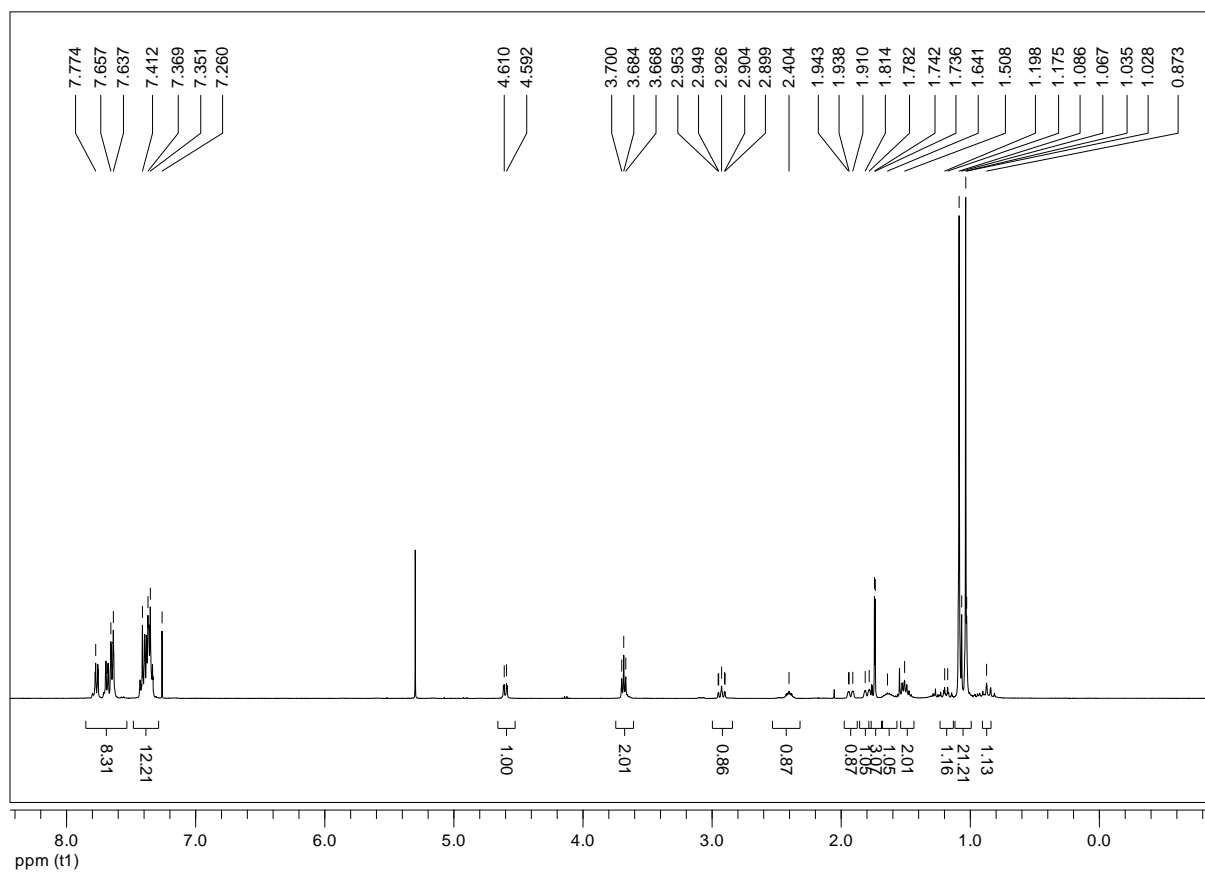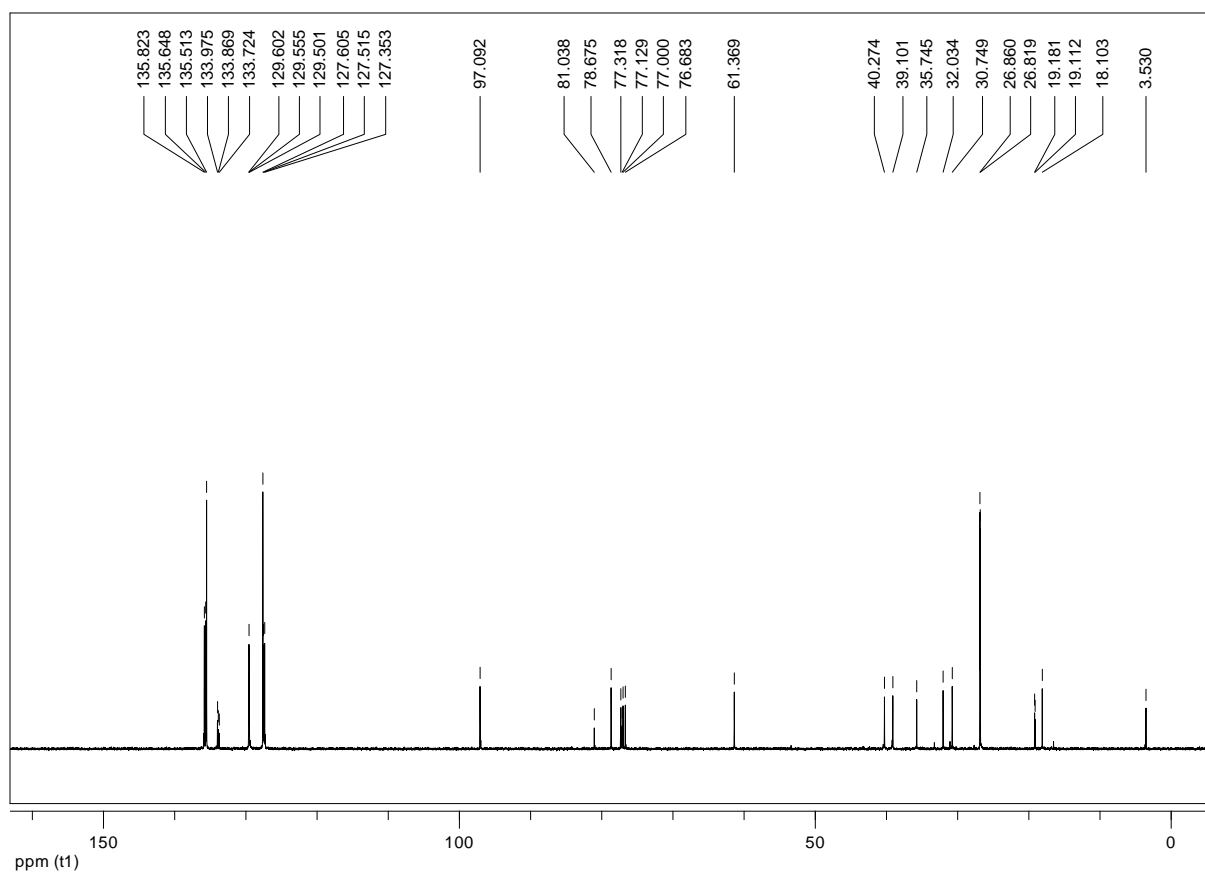

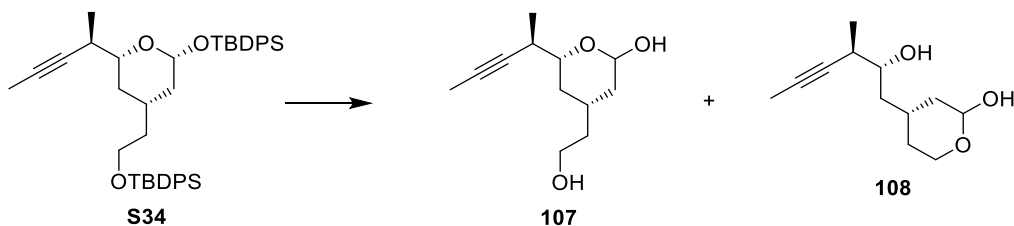

**(4*R*,6*R*)-4-(2-Hydroxyethyl)-6-((*R*)-pent-3-yn-2-yl)tetrahydro-2H-pyran-2-ol (107) and (4*R*)-4-((2*R*,3*R*)-2-hydroxy-3-methylhex-4-yn-1-yl)tetrahydro-2H-pyran-2-ol (108):** To a solution of **S34** (5.53 g, 8.03 mmol, 1.0 equiv) in THF (83 mL) was added at 0 °C AcOH (1.61 mL, 28.1 mmol, 3.5 equiv) and TBAF (28.0 mL, 28.0 mmol, 3.5 equiv, 1.0 M in THF). After stirring for 16 h at rt, the reaction mixture was diluted with EtOAc and quenched at 0 °C with sat. NaHCO<sub>3</sub> (60 mL). The layers were separated and the aqueous layer was extracted with EtOAc (3 x 40 mL). The combined organic extracts were dried over MgSO<sub>4</sub> and the solvent was removed under reduced pressure. The residue was purified by column chromatography (hexane/EtOAc, 1:1  $\rightarrow$  0:1) to give **107/108** (1.84 g, including residual solvent) as a colorless oil.

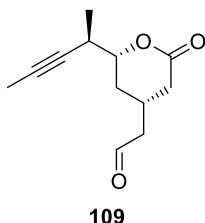

**2-((4*S*,6*R*)-2-Oxo-6-((*R*)-pent-3-yn-2-yl)tetrahydro-2H-pyran-4-yl)acetaldehyde (109):** To a solution of **107/108** (1.42 g, 7.2% wt/wt solvent, 1.32 g, 6.20 mmol, 1.0 equiv) in CH<sub>2</sub>Cl<sub>2</sub> (84 mL) over molecular sieves (6.54 g powder, 4 Å) was added at rt NMO (2.01 g, 14.9 mmol, 2.4 equiv). After stirring for 20 min at rt, TPAP (392 mg, 1.12 mmol, 18 mol%) was added at 0 °C in one portion and stirring was continued for 40 min at rt. The reaction mixture was directly purified by column chromatography (hexane/EtOAc, 2:1  $\rightarrow$  1:1) to give **109** (652 mg, 99% wt/wt CH<sub>2</sub>Cl<sub>2</sub>, 646 mg, 50% over 2 steps) as a colorless oil. The analytical data were identical to those reported (*vide supra*).

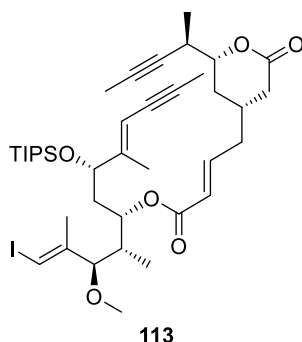

**(1*E*,3*R*,4*S*,5*S*,7*S*,8*E*)-1-Iodo-3-methoxy-2,4,8-trimethyl-7-((triisopropylsilyl)oxy)-dodeca-1,8-dien-10-yn-5-yl (E)-4-((4*R*,6*R*)-2-oxo-6-((*R*)-pent-3-yn-2-yl)tetrahydro-2*H*-pyran-4-yl)but-2-enoate (**113**):** To LiCl (99.0 mg, 2.34 mmol, 1.05 eq) was added a solution of phosphonate **101** (1.62 g, 2.23 mmol, 1.00 eq) in MeCN (15 mL), followed by DBU (349  $\mu$ L, 2.24 mmol, 1.05 eq). After 20 min stirring at rt, the pale yellow turbid mixture was cooled to 0 °C. After 25 min, a solution of aldehyde **109** (556 mg, 2.67 mmol, 1.20 eq) in THF (17 mL) was added. The cooling bath was removed and the resulting yellow solution was stirred at rt for 3 h. Then the mixture was concentrated *in vacuo* and the residue was purified by column chromatography (hexane/EtOAc 5:1 $\rightarrow$ 1:1) to afford diyne **113** (1.44 g, 98% wt/wt along with Et<sub>2</sub>O and CH<sub>2</sub>Cl<sub>2</sub>, 1.41 g, 81%) as a colourless oil. In addition, part of phosphonate **101** was recovered (116 mg, 94% wt/wt along with ether and EtOAc, 110 mg, 7%).

**TLC** (hexane/EtOAc, 5:1):  $R_f$  = 0.24

**$[\alpha]_D^{24}$**  = +23.6° [ $c$  = 0.905, CHCl<sub>3</sub>]

**<sup>1</sup>H-NMR** (400.1 MHz, CDCl<sub>3</sub>):  $\delta$  = 6.81 (td,  $J$  = 7.3, 15.6 Hz, 1H), 6.15 (s, 1H), 5.83 (d,  $J$  = 15.6 Hz, 1H), 5.33 (brs, 1H), 4.77 (ddd,  $J$  = 1.5, 4.0, 10.1 Hz, 1H), 4.12 (t,  $J$  = 6.5 Hz, 1H), 4.06 (ddd,  $J$  = 3.0, 7.2, 11.4 Hz, 1H), 3.37 (d,  $J$  = 7.0 Hz, 1H), 3.15 (s, 3H), 2.77-2.61 (m, 2H), 2.32-2.18 (m, 3H), 2.17-2.00 (m, 3H), 1.95 (d,  $J$  = 2.1 Hz, 3H), 1.88-1.76 (m, 1H), 1.82 (d,  $J$  = 0.8 Hz, 3H), 1.79 (s, 3H), 1.78 (d,  $J$  = 2.3 Hz, 3H), 1.74-1.64 (m, 1H), 1.42-1.29 (m, 1H), 1.23 (d,  $J$  = 7.0 Hz, 3H), 1.02 (brs, 21H), 0.90 (d,  $J$  = 6.9 Hz, 3H).

**<sup>13</sup>C-NMR** (100.6 MHz, CDCl<sub>3</sub>):  $\delta$  = 170.2, 165.3, 150.9, 146.4, 144.2, 124.2, 106.5, 89.4, 87.5, 82.5, 79.0, 78.9, 78.5, 76.9, 75.2, 72.5, 56.7, 38.8, 38.7, 36.1, 35.9, 32.3, 32.0, 30.7, 19.7, 18.2, 18.1, 17.5, 14.0, 12.4, 9.7, 4.5, 3.5.

**IR** (neat,  $\nu/\text{cm}^{-1}$ ): 2941m, 2922m, 2866m, 1737s, 1718s, 1656w, 1462m, 1381m, 1246m, 1085s, 1059s, 1005m, 884m, 680m.

**HRMS (ESI):**  $m/z$  calcd for  $C_{39}H_{65}INO_6Si$   $[M + NH_4]^+$ : 798.3620; found: 798.3632.

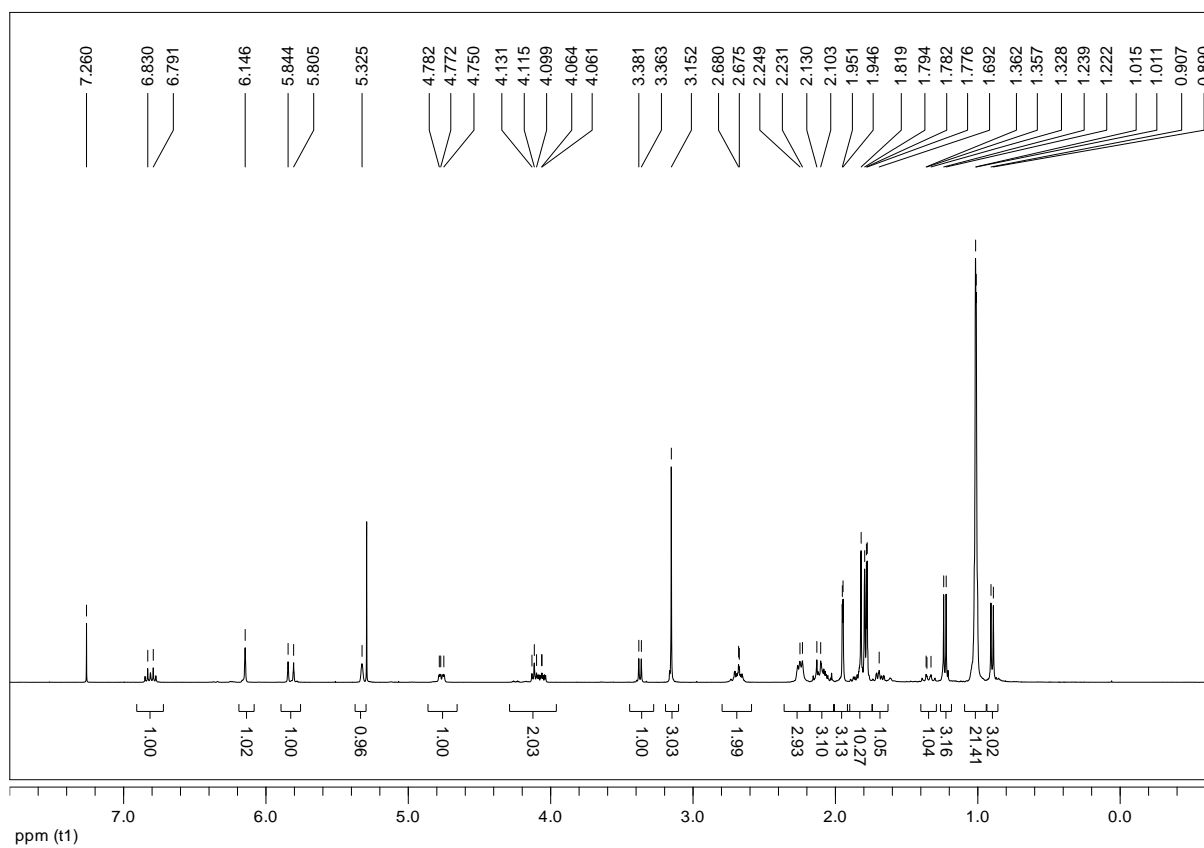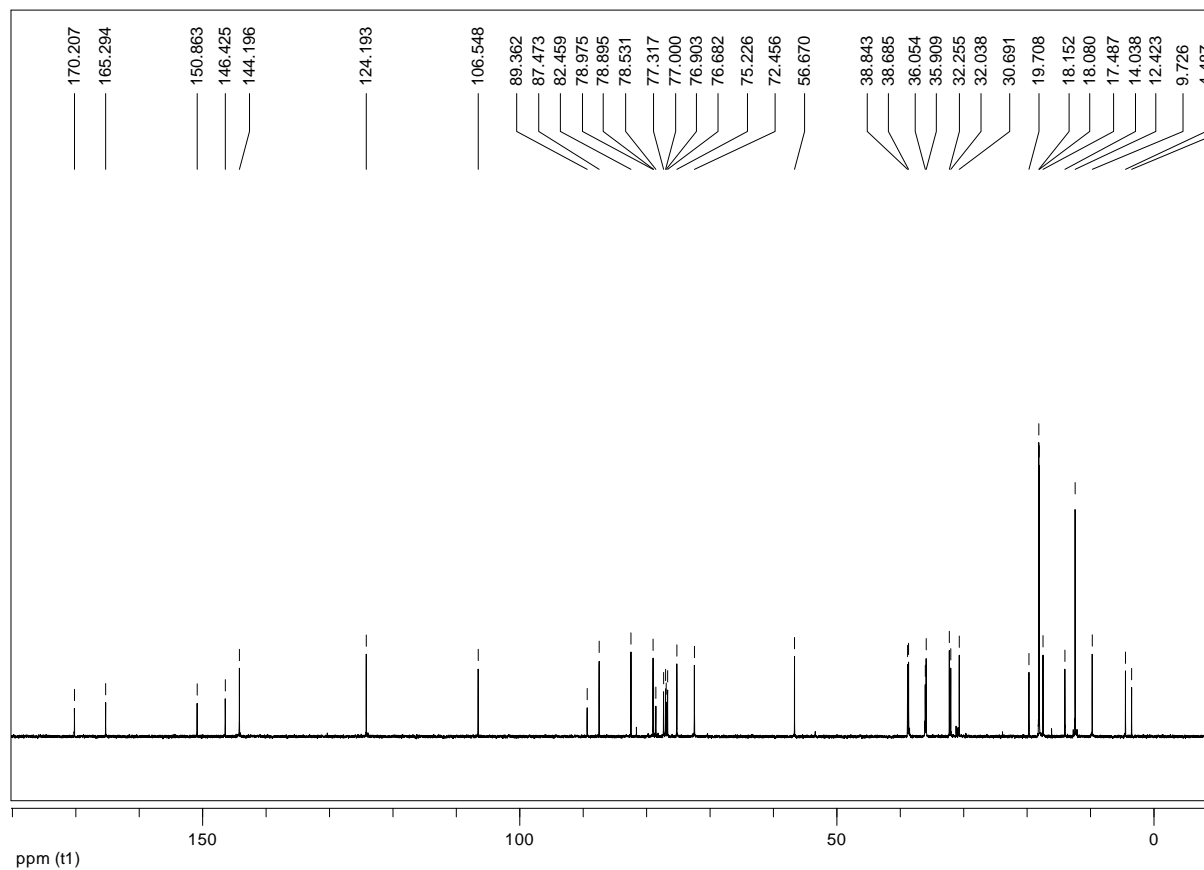

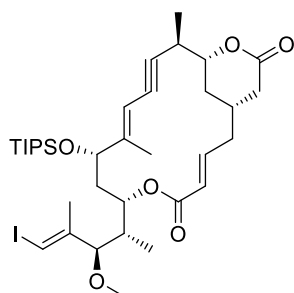

116

**(1*R*,3*E*,7*S*,9*S*,12*E*,14*R*,15*R*)-7-((2*S*,3*R*,*E*)-5-Iodo-3-methoxy-4-methylpent-4-en-2-yl)-10,14-dimethyl-9-((triisopropylsilyl)oxy)-6,16-dioxabicyclo[13.3.1]nonadeca-3,12-diene-10-yn-5,17-dione (116):**

Using Mo-complex **114**: A suspension of the Mo-complex **114** (37.3 mg, 31.3  $\mu\text{mol}$ , 35 mol%) and  $\text{MnCl}_2$  (3.94 mg, 31.3  $\mu\text{mol}$ , 35 mol%) in toluene (1.86 mL) was heated to 80 °C for 30 min. Then an aliquot corresponding to 10 mol% catalyst was used.

To a suspension of the diyne **113** (34.9 mg, 44.7  $\mu\text{mol}$ , 1.00 eq) and molecular sieves (255 mg, 5 Å powdered) in toluene (9.5 mL) was added the above catalyst solution (10 mol%) at rt and the mixture was heated to reflux (125 °C oil bath) for 2 h 45 min; at this point reaction monitoring by ESI-MS indicated full conversion. The mixture was then allowed to cool to rt and stored in a freezer (−18 °C) overnight. It was then filtered through a short pad of silica (in a 20 mL syringe), which was rinsed thoroughly with EtOAc. The combined filtrates were concentrated under reduced pressure and the residue was purified by column chromatography (hexane/EtOAc 4:1→3:1) to afford the macrocyclic dienyne **116** (22.5 mg, 69%) as a pale brown foam.

Using Mo-complex **115**: A suspension of the Mo-complex **115** (165 mg, 135  $\mu\text{mol}$ , 15 mol%) and  $\text{MnCl}_2$  (17.0 mg, 135  $\mu\text{mol}$ , 15 mol%) in toluene (3 mL) was heated to 80 °C for 30 min and then added *via* cannula (rinsed with 2×1 mL) to a suspension of the diyne **113** (705 mg, 903  $\mu\text{mol}$ , 1.00 eq) and molecular sieves (5.2 g, 5 Å powdered) in toluene (150 mL); the latter had been prestirred at rt for 20 min. The resulting mixture was then heated to 125 °C for 27 h with stirring (oil bath). Regular reaction monitoring by ESI-MS indicated the reaction to proceed very slowly and not go to completion. The mixture was filtered through a pad of silica, which was rinsed thoroughly with EtOAc. The combined

filtrates were concentrated under reduced pressure and the crude product was purified by column chromatography (hexane/EtOAc 3:1) to afford the macrocyclic dienyne **116** (365 mg, 56%). In addition, a mixture containing the starting material, side product **S35** and the desired product **116** (94.9 mg, ca. 3.6/2.2/1 **113/S35/116**) was isolated.

In a second experiment conducted on the same scale of **113**, pure **116** was obtained in 31% yield (204 mg) as a bright brown solid. In addition, two mixed fractions of **116/S35** (76.5 mg, containing 48.8 mg of **116**) and of **115/S35** (179 mg) were isolated. The reasons for the discrepancy between the two experiments, which were performed under ostensibly identical conditions, is unclear.

**TLC** (hexane/EtOAc, 1:1):  $R_f$  = 0.55

$[\alpha]_D^{24} = -13.9$  ( $c$  = 0.83,  $\text{CHCl}_3$ )

**$^1\text{H-NMR}$**  (500.1 MHz,  $\text{CDCl}_3$ ):  $\delta$  = 6.79 (ddd,  $J$  = 5.6 Hz,  $J$  = 10.2 Hz,  $J$  = 15.8 Hz, 1H), 6.14 (d,  $J$  = 0.7 Hz, 1H), 5.73 (d,  $J$  = 16.0 Hz, 1H), 5.27 ( $m_c$ , 1H), 4.40 (dd,  $J$  = 3.2 Hz,  $J$  = 10.0 Hz, 1H), 4.03-3.93 (m, 2H), 3.34 (d,  $J$  = 8.5 Hz, 1H), 3.17 (s, 3H), 2.80 ( $m_c$ , 1H), 2.72 (ddd,  $J$  = 2.2 Hz,  $J$  = 5.0 Hz,  $J$  = 17.6 Hz, 1H), 2.55-2.46 (m, 1H), 2.41 (ddd,  $J$  = 3.2 Hz,  $J$  = 5.6 Hz,  $J$  = 14.0 Hz, 1H), 2.22 (dd,  $J$  = 11.5 Hz,  $J$  = 17.6 Hz, 1H), 2.22-2.14 (m, 1H), 2.10-1.86 (m, 3H), 1.89 (d,  $J$  = 1.0 Hz, 3H), 1.82 (d,  $J$  = 1.0 Hz, 3H), 1.71 (dd,  $J$  = 4.1 Hz,  $J$  = 14.8 Hz, 1H), 1.27 (d,  $J$  = 6.9 Hz, 3H), 1.24-1.11 (m, 1H), 1.09-0.99 (m, 21H), 0.96 (d,  $J$  = 6.8 Hz, 3H).  **$^{13}\text{C-NMR}$**  (125.8 MHz,  $\text{CDCl}_3$ ):  $\delta$  = 170.2, 165.2, 152.4, 147.4, 145.0, 125.2, 106.5, 93.3, 88.4, 83.1, 81.9, 79.0, 77.3, 72.8, 56.5, 38.8, 37.2, 36.3, 35.2, 34.0, 31.3, 29.9, 19.0, 18.1 (2C), 18.0, 17.0, 13.6, 12.3 (6C), 9.7.

**IR** (neat,  $\text{v}/\text{cm}^{-1}$ ): 2959, 2940, 2891, 2866, 1737 (s), 1716 (s), 1652, 1461, 1384, 1323, 1258, 1219, 1185, 1158, 1122, 1082 (s), 1059 (s), 1011, 997, 984, 961, 884, 849, 800, 785, 756, 684, 602, 533, 517, 476, 461, 444.

**HRMS (ESI)**:  $m/z$  calcd for  $\text{C}_{35}\text{H}_{55}\text{INaO}_6\text{Si}$   $[\text{M}+\text{Na}]^+$ : 749.2705; found: 749.2723.

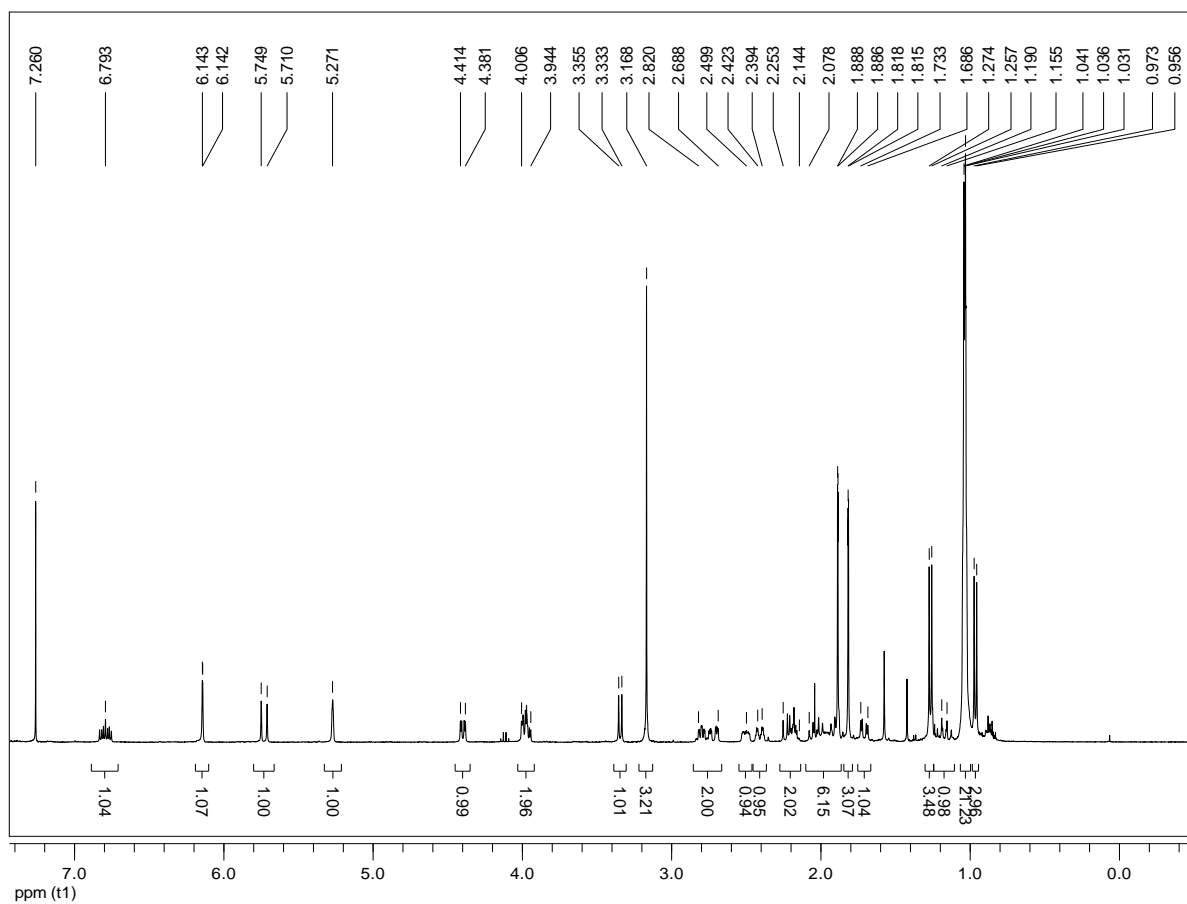

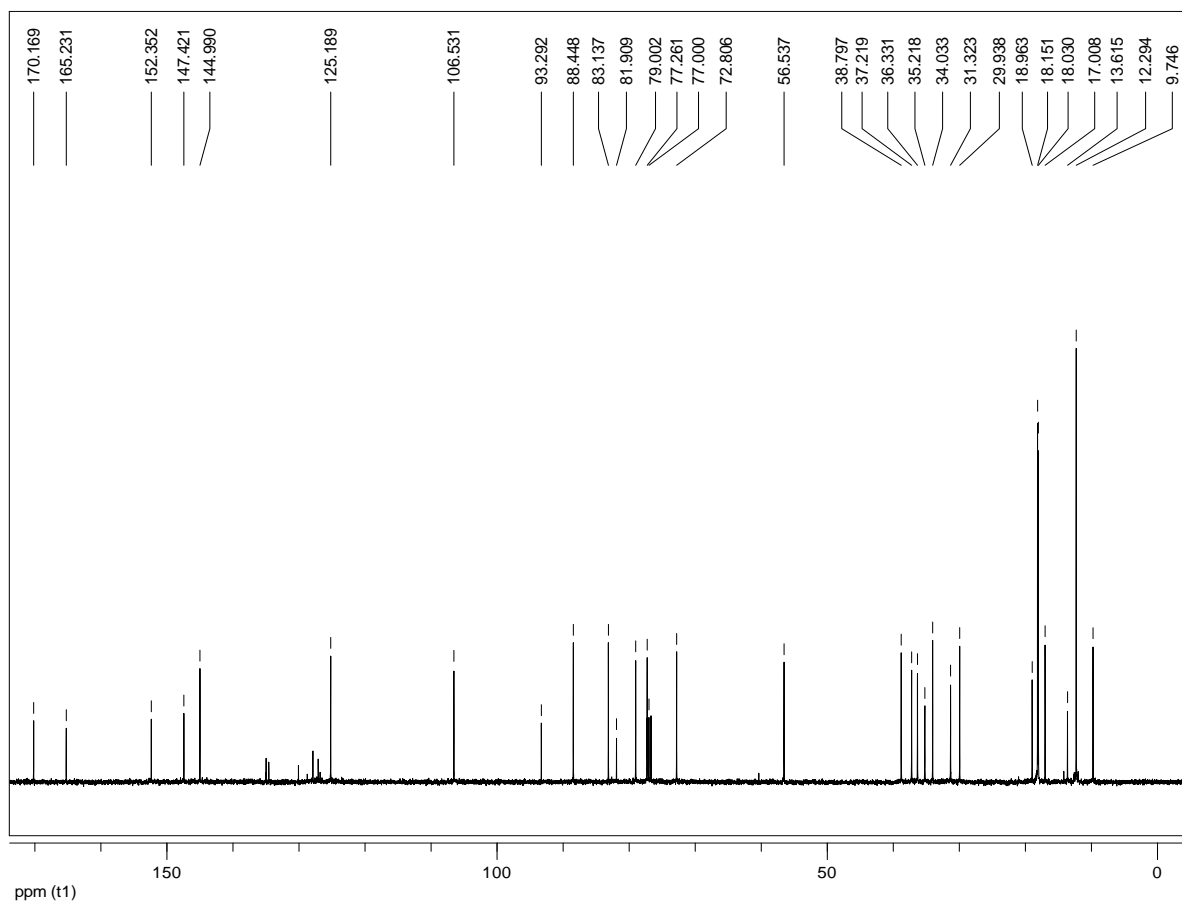



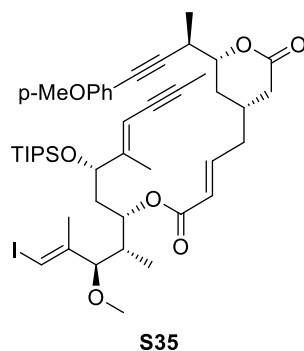

**(1*E*,3*R*,4*S*,5*S*,7*S*,8*E*)-1-Iodo-3-methoxy-2,4,8-trimethyl-7-((triisopropylsilyl)-oxy)dodeca-1,8-dien-10-yn-5-yl (*E*)-4-((4*R*,6*R*)-2-oxo-6-((*R*)-4-(*p*-methoxy)-phenylbut-3-yn-2-yl)tetrahydro-2*H*-pyran-4-yl)but-2-enoate (S35):**

$R_f = 0.33$  (hexane/EtOAc, 3:1)

$[\alpha]_D^{24} = +37.6^\circ$  [ $c = 0.125$ ,  $\text{CHCl}_3$ ]

**$^1\text{H-NMR}$**  (500.1 MHz,  $\text{CDCl}_3$ ):  $\delta = 7.34\text{--}7.28$  (m, 2H), 6.86–6.77 (m, 3H), 6.16 (s, 1H), 5.80 (d,  $J = 15.6$  Hz, 1H), 5.11 (s, 1H), 4.97 (t,  $J = 6.8$  Hz, 1H), 4.79 (mc, 1H), 4.19 (mc, 1H), 3.79 (s, 3H), 3.38 (d,  $J = 7.3$  Hz, 1H), 3.16 (s, 3H), 2.96 (mc, 1H), 2.76–2.63 (m, 1H), 2.35–2.19 (m, 3H), 2.19–2.07 (m, 3H), 1.93 (d,  $J = 1.7$  Hz, 3H), 1.88–1.79 (m, 1H), 1.84 (s, 3H), 1.79–1.70 (m, 1H), 1.72 (s, 3H), 1.49–1.39 (m, 1H), 1.34 (d,  $J = 7.0$  Hz, 3H), 1.10–0.99 (m, 21H), 0.90 (d,  $J = 6.9$  Hz, 3H).

**$^{13}\text{C-NMR}$**  (125.8 MHz,  $\text{CDCl}_3$ ):  $\delta = 170.2, 165.1, 159.4, 151.0, 146.4, 143.8, 133.0, 124.3, 115.1, 113.9, 106.1, 89.3, 87.7, 87.3, 83.3, 82.2, 79.2, 76.4, 72.5, 70.3, 56.6, 55.2, 38.7, 38.6, 35.9, 35.6, 32.9, 32.0, 30.6, 19.5, 18.2, 18.0, 17.3, 16.7, 12.4, 9.8, 4.7$ .

**IR** (neat,  $\nu/\text{cm}^{-1}$ ): 2924m, 2865m, 1737m, 1719m, 1655w, 1607w, 1510m, 1462m, 1379w, 1248s, 1173w, 1085s, 1058s, 1030m, 883m, 832m, 804m, 683m.

**HRMS (ESI)**:  $m/z$  calcd for  $\text{C}_{45}\text{H}_{65}\text{I}\text{NaO}_7\text{Si}$  [ $\text{M} + \text{Na}$ ] $^+$ : 895.3436, found: 895.3424.

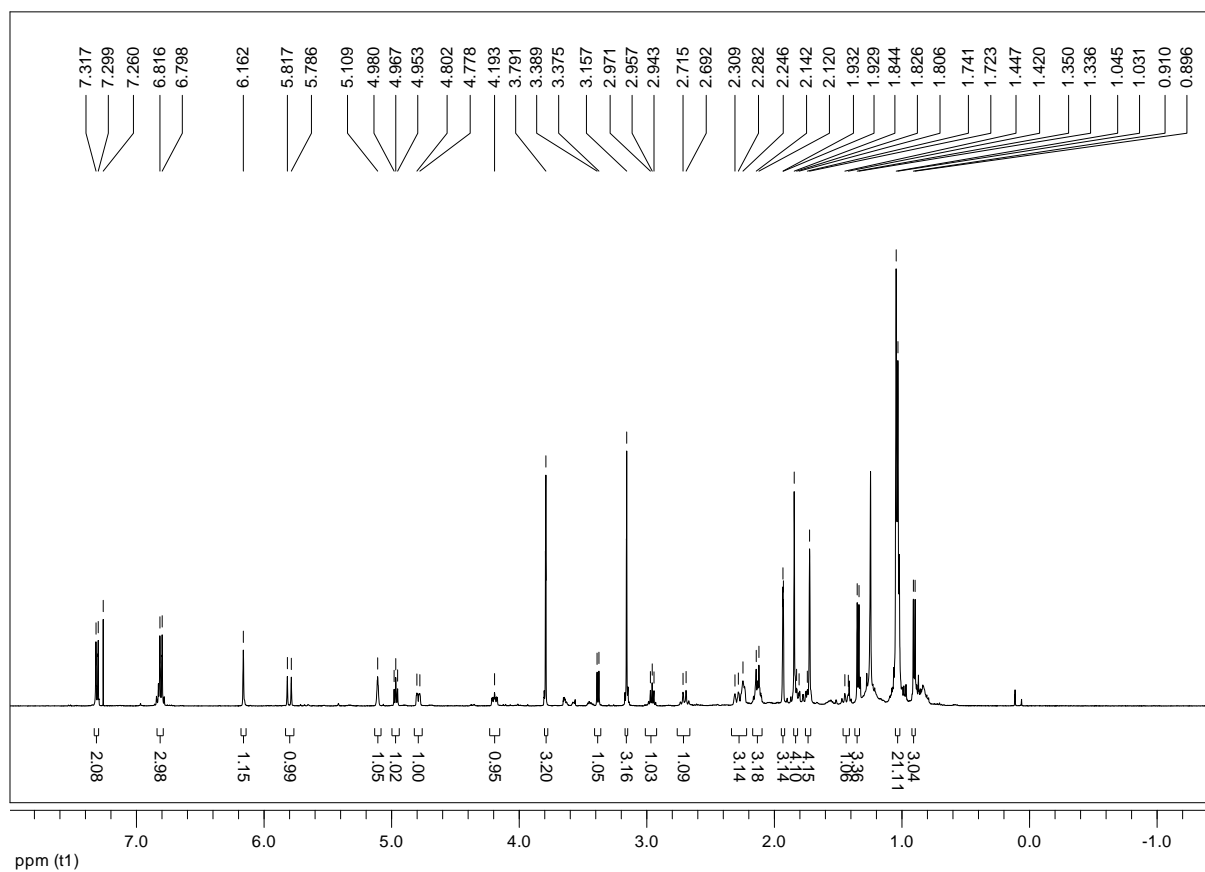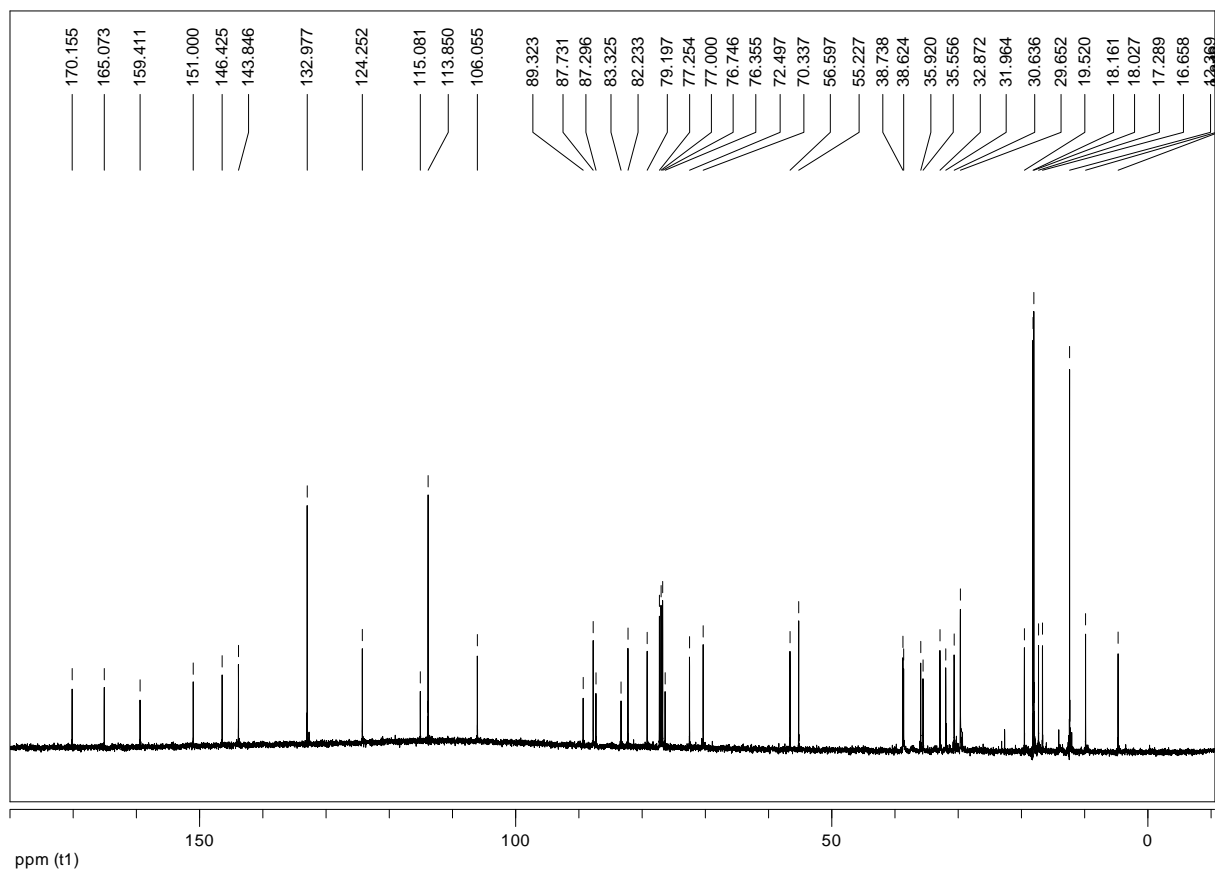

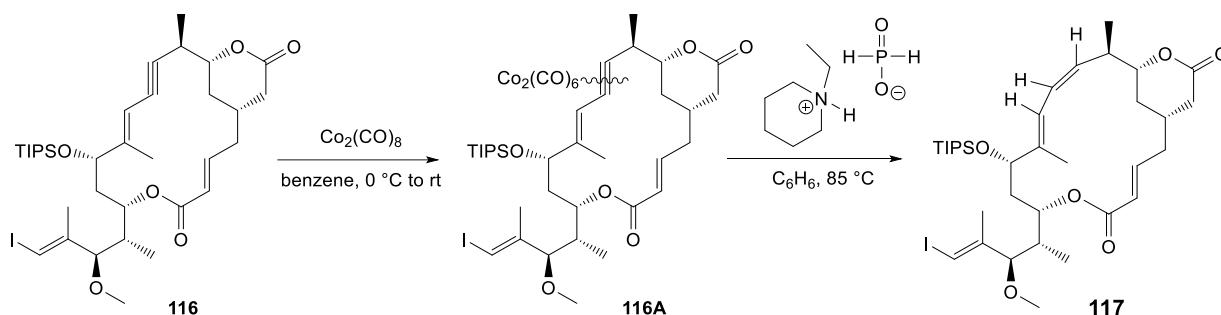

**(1*R*,3*E*,7*S*,9*S*,10*E*,12*Z*,14*R*,15*R*)-7-((2*S*,3*R*,*E*)-5-Iodo-3-methoxy-4-methylpent-4-en-2-yl)-10,14-dimethyl-9-((triisopropylsilyl)oxy)-6,16-dioxabicyclo-**

**[13.3.1]nonadeca-3,10,12-triene-5,17-dione (**117**):** To alkyne **116** (323 mg, 444  $\mu\text{mol}$ , 1.00 eq) was added  $\text{Co}_2(\text{CO})_8$  (304 mg, 889  $\mu\text{mol}$ , 2.00 eq) in a glovebox and the mixture was dissolved in  $\text{CH}_2\text{Cl}_2$  (16 mL) at rt. After stirring at rt for 4 h, the reaction did not proceed any further. The solvent evaporated and crude **116A** was dried under reduced pressure (affording a dark brown foam), then N-ethylpiperidine hypophosphite was added in a glovebox, benzene (19 mL) was added and the mixture was heated to reflux for 1.5 h. Afterwards it was passed through a plug of silica eluting with hexane/EtOAc 1:1 (100 mL) and the plug was rinsed with EtOAc (2 $\times$ 100 mL). Evaporation of the solvent and drying of the residue under reduced pressure gave a mixture of the parent alkyne **116** and the desired olefin **117** as a pale brown foam (293 mg).  $^1\text{H}$ -NMR measurement failed, probably due to paramagnetic cobalt being present. The conversion was estimated to be 50% from ESI-MS and from a former experiment, where NMR-analysis was possible.

**2<sup>nd</sup> Cycle:** To a solution of the above mixture (estimated to contain 146 mg alkyne **116**, 0.201 mmol, 1.00 eq) in  $\text{CH}_2\text{Cl}_2$  (8 mL) was added  $\text{Co}_2(\text{CO})_8$  (137 mg, 2 equiv); the solution was stirred for 3.5 h and then stored in a freezer overnight. The solvent was evaporated and the residue was dried under reduced pressure. To the resulting dark brown foam was added N-ethylpiperidine hypophosphite (360 mg, 10 eq), benzene (9 mL) was added and the mixture was refluxed for 40 min. It was then filtered through a plug of silica (hexane/EtOAc 1:1) to afford a mixture of **116** and **117** (273 mg). The conversion was again estimated to be around 50%.

**3<sup>rd</sup> Cycle:** To the mixture obtained above (estimated 68 mg alkyne **153**, 1.00 eq) was added  $\text{Co}_2(\text{CO})_8$  (64 mg, 2.00 eq) in a glovebox and  $\text{CH}_2\text{Cl}_2$  (3.5 mL) was added at rt. After stirring for 1 h, the solvent was evaporated and the residue was dried under reduced

pressure. To the dark brown foam was added N-ethylpiperidine hypophosphite (168 mg, 10 eq) in a glovebox followed by benzene (4 mL) and the mixture was refluxed for 40 min. After filtration through a plug of silica (hexane/EtOAc 1:1) the solvent was evaporated and the residue was purified by column chromatography (hexane/EtOAc 3:1) to afford the desired olefin **117** (239 mg, 74%; **117/116** 20/1) as a beige foam.

**TLC** (hexane/EtOAc, 2:1):  $R_f$  = 0.38

$[\alpha]_D^{24} = -33.3^\circ$  [ $c = 0.640$ ,  $\text{CHCl}_3$ ]

**$^1\text{H}$ -NMR** (400.1 MHz,  $\text{CDCl}_3$ ):  $\delta$  = 6.65 (ddd,  $J$  = 4.7, 10.9, 15.6 Hz, 1H), 6.46 (d,  $J$  = 12.2 Hz, 1H), 6.25 (dd,  $J$  = 11.5, 11.5 Hz, 1H), 6.18 (s, 1H), 5.82 (d,  $J$  = 15.8 Hz, 1H), 5.00 (dd,  $J$  = 10.6, 10.6 Hz, 1H), 4.42 ( $m_c$ , 2H), 3.80 (dt,  $J$  = 3.6, 10.0 Hz, 1H), 3.30 (d,  $J$  = 9.0 Hz, 1H), 3.16 (s, 3H), 2.79-2.63 (m, 1H), 2.73 (dd,  $J$  = 7.5, 17.1 Hz, 1H), 2.55 ( $m_c$ , 1H), 2.33 ( $m_c$ , 1H), 2.28 (dd,  $J$  = 6.5, 17.2 Hz, 1H), 2.21-2.07 (m, 2H), 1.95-1.78 (m, 3H), 1.88 (s, 3H), 1.62 (s, 3H), 1.15-1.04 (m, 25H), 0.98 (d,  $J$  = 6.9 Hz, 3H).

**$^{13}\text{C}$ -NMR** (100.6 MHz,  $\text{CDCl}_3$ ):  $\delta$  = 171.6, 166.0, 147.2, 144.8, 139.7, 130.7, 126.1, 125.4, 119.2, 88.3, 81.6, 79.7, 73.5, 71.8, 56.4, 39.1, 38.8, 38.7, 35.9, 32.8, 32.3, 28.5, 18.8, 18.2, 18.1, 17.2, 15.0, 12.4, 10.0.

**IR** (neat,  $\text{v}/\text{cm}^{-1}$ ): 2926s, 2866s, 1714s, 1654w, 1461m, 1379m, 1326w, 1255m, 1220m, 1160w, 1118w, 1083m, 1010w, 884w, 753w, 679w.

**HRMS (ESI)**:  $m/z$  calcd for  $\text{C}_{35}\text{H}_{57}\text{IKO}_6\text{Si}$  [ $\text{M} + \text{K}$ ] $^+$ : 767.2601; found: 767.2605.

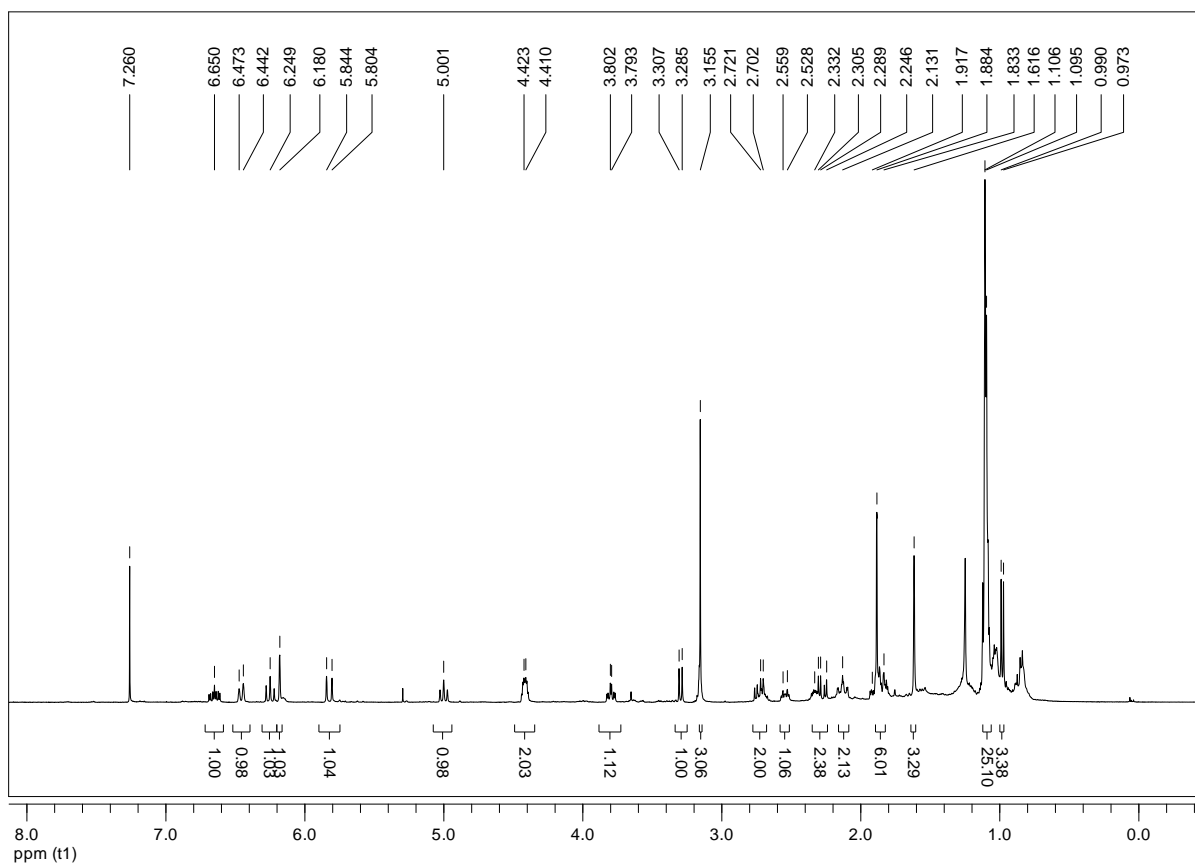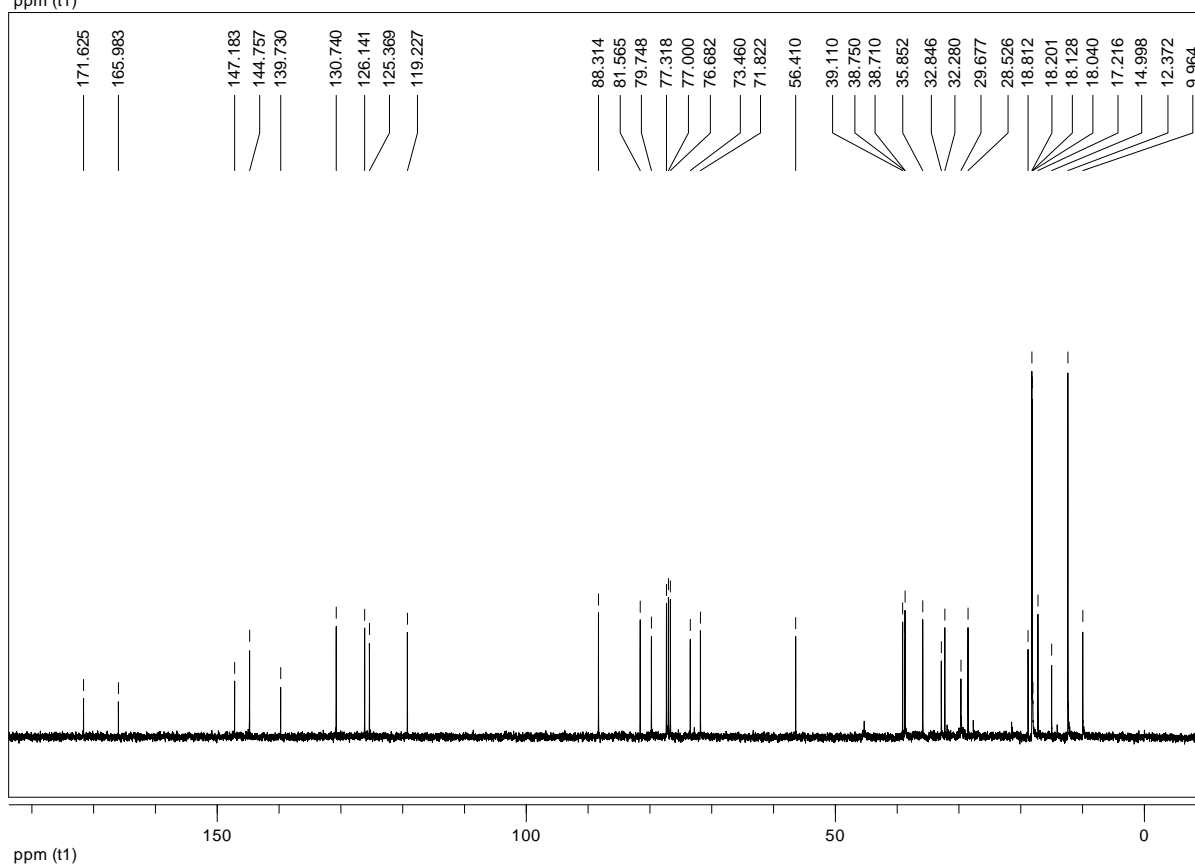

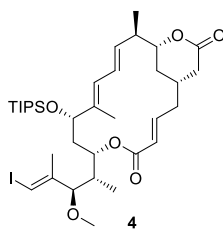

**(1*R*,3*E*,7*S*,9*S*,10*E*,12*E*,14*R*,15*R*)-7-((2*S*,3*R*,*E*)-5-Iodo-3-methoxy-4-methylpent-4-en-2-yl)-10,14-dimethyl-9-((triisopropylsilyl)oxy)-6,16-dioxabicyclo-**

**[13.3.1]nonadeca-3,10,12-triene-5,17-dione (4):** A stock solution containing thiophenol (10.75 mg, 97.6  $\mu\text{mol}$ ) and AIBN (16.0 mg, 97.6  $\mu\text{mol}$ ) in benzene (1.8 mL) was prepared. Then an aliquot (0.1 mL, 0.2 equiv AIBN, 0.2 equiv PhSH) was added to a solution of the *cis* diene **117** (18.8 mg, 25.8  $\mu\text{mol}$ , 1.00 eq) in benzene (1.2 mL); the solution was degassed (2 $\times$ freeze/pump) and then heated to reflux for 2 d. The solvent was evaporated and the residue was purified by column chromatography (hexane/EtOAc 3:1) to afford the desired (*E,E*)-diene **4** (16.9 mg, 97% wt/wt along with EtOAc, 16.5 mg, 88%, *E/Z* 20/1).

**TLC** (hexane/EtOAc, 2:1):  $R_f$  = 0.38

$[\alpha]_D^{24}$  = +10.6° ( $c$  = 0.305,  $\text{CHCl}_3$ )

**$^1\text{H-NMR}$**  (400.1 MHz,  $\text{CDCl}_3$ ):  $\delta$  = 6.75 (ddd,  $J$  = 4.8 Hz,  $J$  = 11.0 Hz,  $J$  = 15.7 Hz, 1H), 6.22 (dd,  $J$  = 11.0 Hz,  $J$  = 15.2 Hz, 1H), 6.15 (d,  $J$  = 0.8 Hz, 1H), 5.74 (bd,  $J$  = 10.3 Hz, 1H), 5.60 (dd,  $J$  = 0.7 Hz,  $J$  = 15.6 Hz, 1H), 5.14 (dd,  $J$  = 9.6 Hz,  $J$  = 15.2 Hz, 1H), 4.45 (dd,  $J$  = 3.0 Hz,  $J$  = 10.8 Hz, 1H), 4.01 (dd,  $J$  = 3.3 Hz,  $J$  = 10.6 Hz, 1H), 3.68 (ddd,  $J$  = 2.7 Hz,  $J$  = 9.8 Hz,  $J$  = 12.1 Hz, 1H), 3.35 (d,  $J$  = 8.7 Hz, 1H), 3.16 (s, 3H), 2.76 (ddd,  $J$  = 2.1 Hz,  $J$  = 5.2 Hz,  $J$  = 18.1 Hz, 1H), 2.59-2.46 (m, 1H), 2.32-2.18 (m, 2H), 2.19-2.04 (m, 2H), 2.00 (qd,  $J$  = 2.4 Hz,  $J$  = 14.3 Hz, 1H), 1.92-1.67 (m, 2H), 1.90 (d,  $J$  = 1.0 Hz, 3H), 1.75 (d,  $J$  = 0.9 Hz, 3H), 1.60 (dd,  $J$  = 3.2 Hz,  $J$  = 15.3 Hz, 1H), 1.21 (d,  $J$  = 6.4 Hz, 3H), 1.14-0.98 (m, 21H), 0.96 (d,  $J$  = 6.9 Hz, 3H), 0.68 (td,  $J$  = 12.0 Hz,  $J$  = 14.1 Hz, 1H).

**$^{13}\text{C-NMR}$**  (100.6 MHz,  $\text{CDCl}_3$ ):  $\delta$  = 170.4, 165.6, 147.2, 146.0, 139.9, 133.5, 130.0, 124.7, 124.6, 88.5, 83.4, 79.3, 78.6, 73.6, 56.5, 45.3, 38.7, 38.2, 36.9, 34.6, 34.3, 29.8, 18.9, 18.2 (2C), 18.1, 16.6, 12.4 (6C), 11.2, 9.8.

**IR** (neat,  $\text{v}/\text{cm}^{-1}$ ): 2938 (s), 2866 (s), 1732 (s), 1650, 1613, 1460, 1383, 1327, 1254, 1222, 1202, 1167, 1124, 1078 (s), 1054 (s), 1011, 980, 885, 838, 800, 785, 763, 755, 746, 682, 656, 603, 534, 507, 475, 468, 453, 445, 437, 428, 411.

**HRMS (ESI):**  $m/z$  calcd. for  $C_{35}H_{57}IKO_6Si$   $[M+K]^+$ : 767.2601; found: 767.2603.

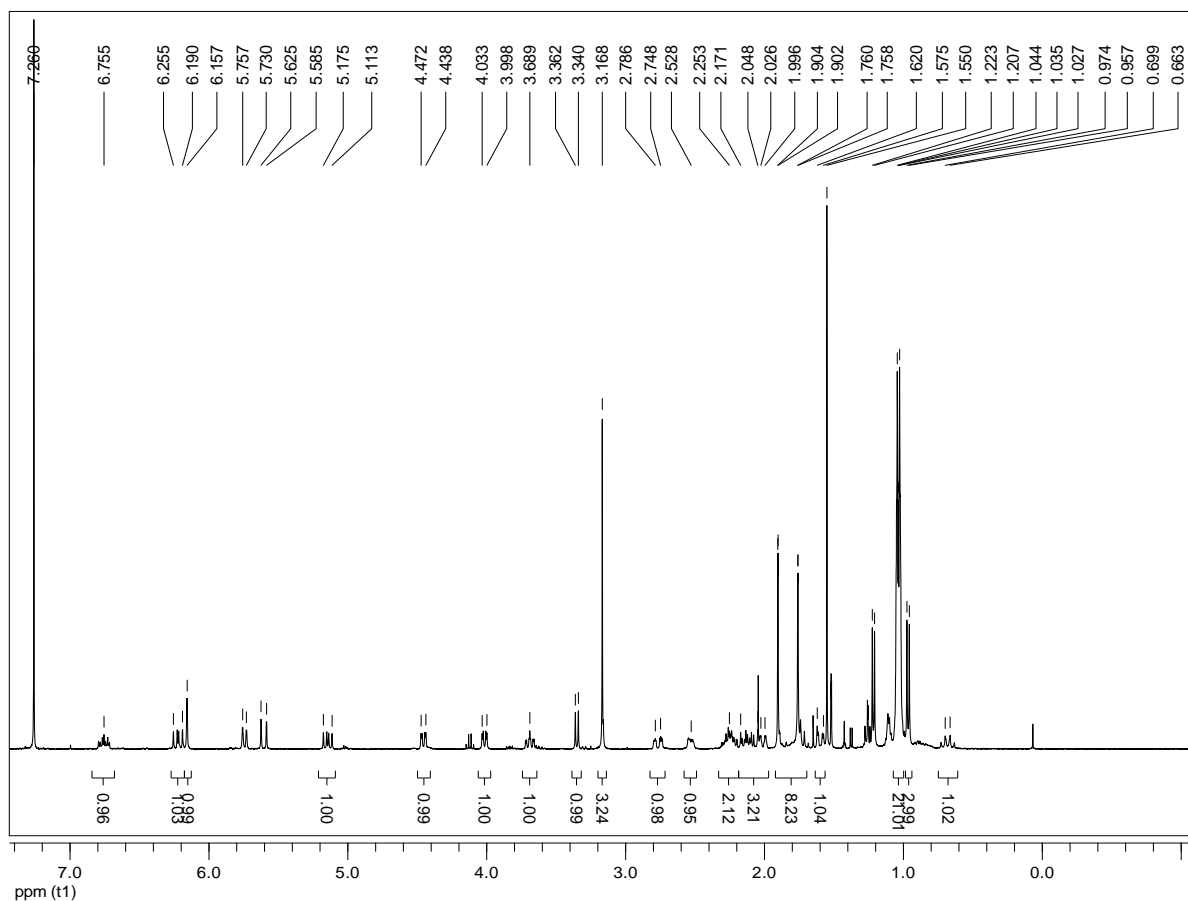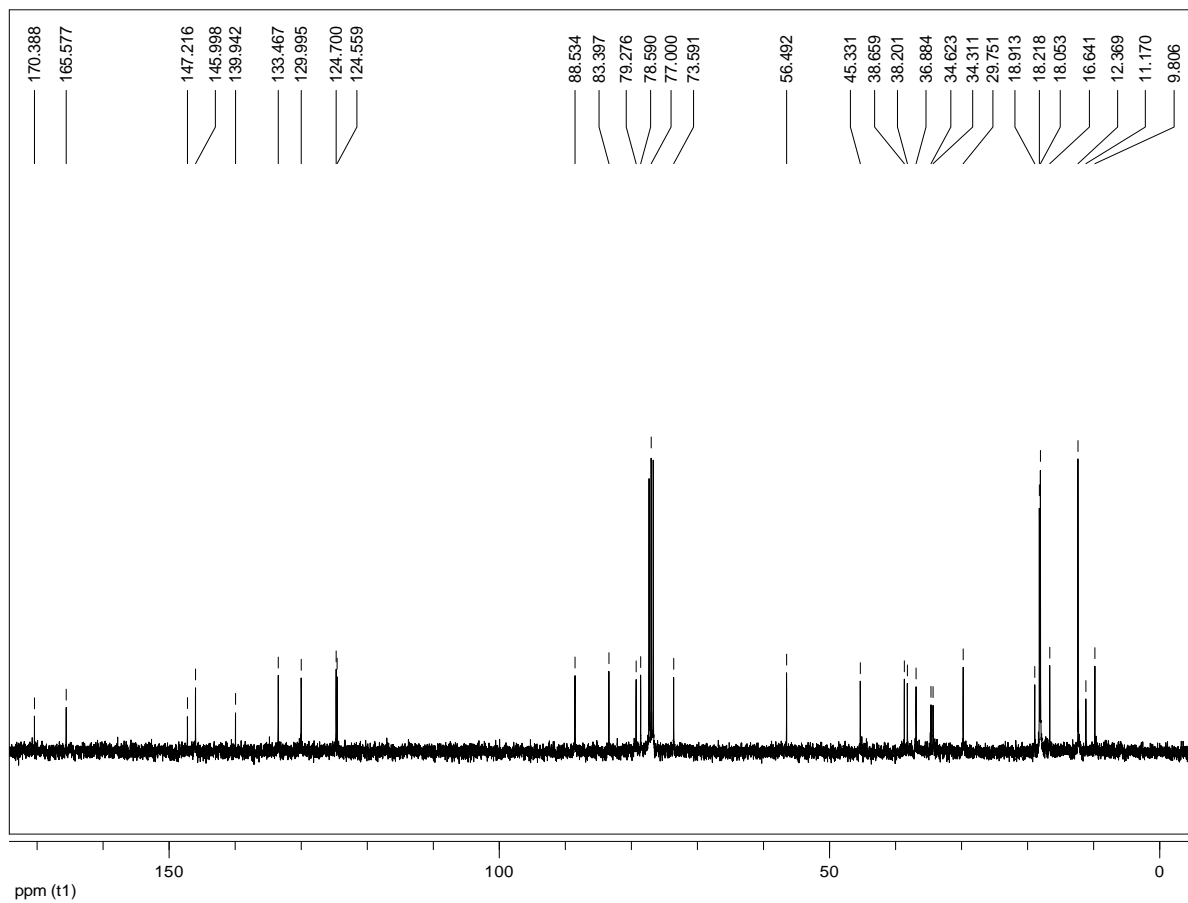



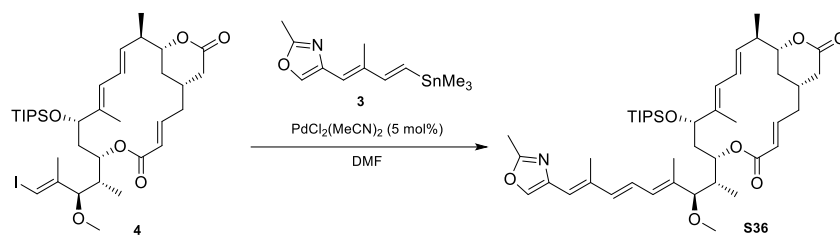

**(1*R*,3*E*,7*S*,9*S*,10*E*,12*E*,14*R*,15*R*)-7-((2*S*,3*R*,4*E*,6*E*,8*E*)-3-Methoxy-4,8-dimethyl-9-(2-methyloxazol-4-yl)nona-4,6,8-trien-2-yl)-10,14-dimethyl-9-((triisopropylsilyl)-oxy)-6,16-dioxabicyclo[13.3.1]nonadeca-3,10,12-triene-5,17-dione (S36):** To vinyl iodide **4** (16.5 mg, 22.6  $\mu$ mol, 1.00 eq) was added a solution vinyl stannane **118** (14.1 mg, 45.2  $\mu$ mol, 2.00 eq) in DMF (1.6 mL) at rt, followed by a solution of PdCl<sub>2</sub>(MeCN)<sub>2</sub> (290  $\mu$ g, 1.13  $\mu$ mol, 5 mol%) in DMF (620  $\mu$ L). The pale yellow solution was stirred in the dark overnight, whereafter the colour had changed to dark orange. Reaction monitoring by ESI-MS indicated full conversion. Ether (15 mL) and NaHCO<sub>3</sub> (sat. aq., 15 mL) were added and the layers were separated. The aqueous phase was extracted with ether (3 $\times$ 10 mL) and the combined organic extracts were washed with brine, dried over MgSO<sub>4</sub> and concentrated under reduced pressure. The residue was purified by column chromatography (hexane/EtOAc 2:1 $\rightarrow$ 1:1) to afford the desired product **S36** (11.6 mg, 68%) as a yellow oil.

**TLC** (hexane/EtOAc, 1:1):  $R_f$  = 0.54

**$[\alpha]_D^{24}$**  = +130.9° ( $c$  = 0.580, CHCl<sub>3</sub>)

**<sup>1</sup>H-NMR** (400.1 MHz, CDCl<sub>3</sub>):  $\delta$  = 7.55 (s, 1H), 6.74 (ddd,  $J$  = 4.7 Hz,  $J$  = 10.9 Hz,  $J$  = 15.6 Hz, 1H), 6.61 (dd,  $J$  = 10.8 Hz,  $J$  = 15.2 Hz, 1H), 6.33 (d,  $J$  = 15.3 Hz, 1H), 6.24 (bs, 1H), 6.20 (dd,  $J$  = 10.9 Hz,  $J$  = 15.2 Hz, 1H), 6.05 (d,  $J$  = 10.8 Hz, 1H), 5.69 (d,  $J$  = 11.2 Hz, 1H), 5.60 (d,  $J$  = 16.0 Hz, 1H), 5.09 (dd,  $J$  = 9.6 Hz,  $J$  = 15.2 Hz, 1H), 4.54 (dd,  $J$  = 2.7 Hz,  $J$  = 10.9 Hz, 1H), 3.99 (dd,  $J$  = 3.3 Hz,  $J$  = 10.6 Hz, 1H), 3.65 (ddd,  $J$  = 2.5 Hz,  $J$  = 9.3 Hz,  $J$  = 11.9 Hz, 1H), 3.20 (d,  $J$  = 9.4 Hz, 1H), 3.16 (s, 3H), 2.75 (ddd,  $J$  = 2.1 Hz,  $J$  = 5.2 Hz,  $J$  = 18.1 Hz, 1H), 2.56-2.49 (m), 2.46 (s, 3H), 2.32-2.19 (m, 2H), 2.19-1.95 (m, 3H), 2.13 (s, 3H), 1.90 (s, 3H), 1.86-1.58 (m, 3H), 1.75 (s, 3H), 1.19 (d,  $J$  = 6.4 Hz, 3H), 1.06-0.89 (m, 24H), 0.67 (mc, 1H).

**<sup>13</sup>C-NMR** (100.6 MHz, CDCl<sub>3</sub>):  $\delta$  = 170.4, 165.7, 160.9, 145.8, 140.1, 138.7, 137.5, 137.4, 136.9, 135.9, 133.3, 130.1, 129.3, 124.65, 124.56, 124.1, 120.6, 89.8, 83.4, 78.5, 73.8, 56.1, 45.3, 38.7, 38.2, 36.9, 34.6, 34.2, 29.8, 18.2 (2C), 18.1, 16.6, 14.4, 13.8, 12.4 (6C), 11.5, 11.2, 10.0; **IR** (neat,  $\nu$ /cm<sup>-1</sup>): 2961, 2938, 2893, 2866, 1715 (s), 1649, 1582, 1460, 1383, 1319,

1251, 1220, 1168, 1109, 1077 (s), 1052 (s), 978, 969, 919, 884, 795, 754 (s), 682, 663, 638, 426.

**HRMS (ESI):**  $m/z$  calcd. for  $C_{44}H_{68}NO_7Si$   $[M+H]^+$ : 750.4760; found: 750.4768.

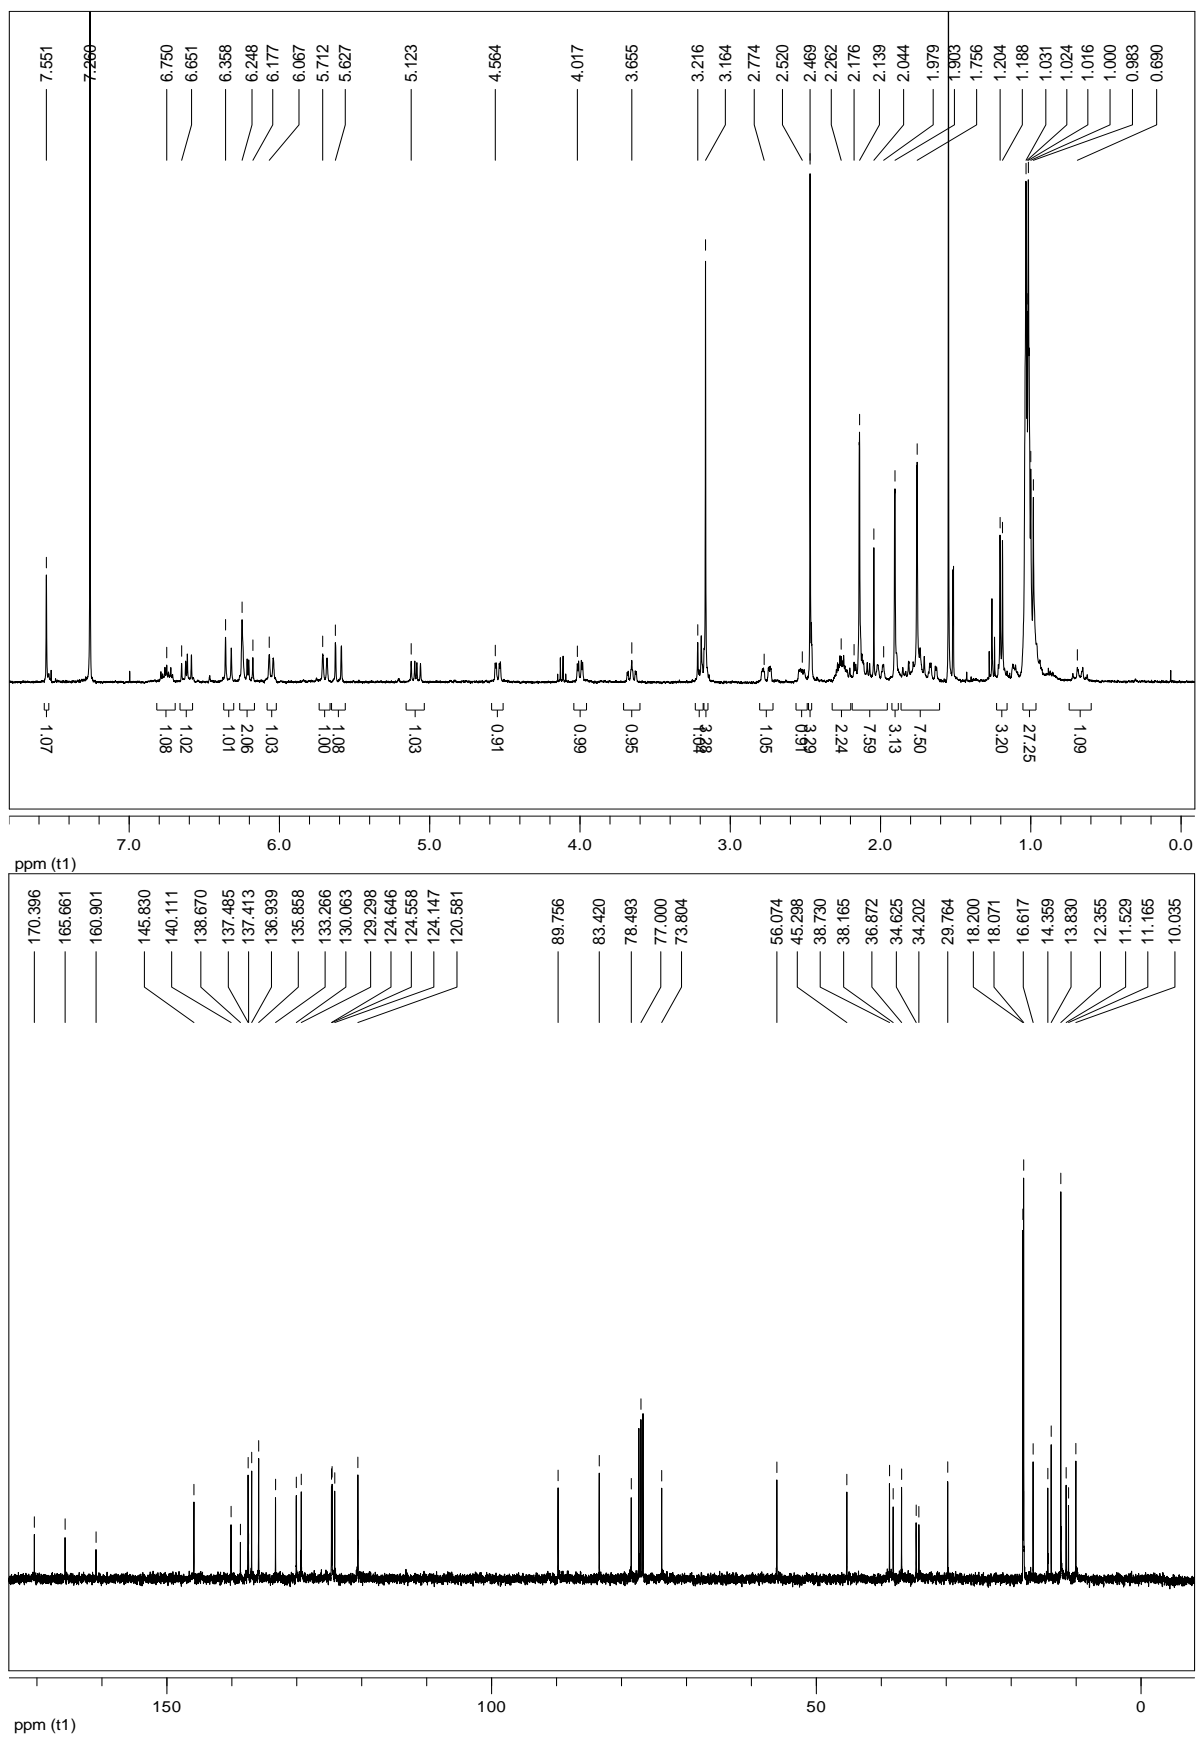

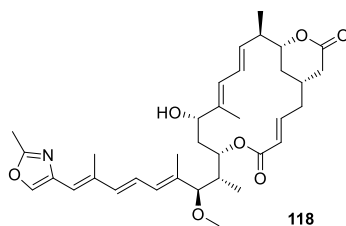

118

**(1*R*,3*E*,7*S*,9*S*,10*E*,12*E*,14*R*,15*R*)-9-Hydroxy-7-((2*S*,3*R*,4*E*,6*E*,8*E*)-3-methoxy-4,8-dimethyl-9-(2-methyloxazol-4-yl)nona-4,6,8-trien-2-yl)-10,14-dimethyl-6,16-dioxabicyclo[13.3.1]nonadeca-3,10,12-triene-5,17-dione (rhizoxin D) (3):** To a solution of TIPS-protected alcohol **S36** (91.0 mg, 121  $\mu$ mol, 1.00 eq) in THF (4.6 mL) and pyridine (1.34 mL) was added a solution of HF•Py (2.68 mL 70% as HF, 2.06 g, 103 mmol, 850 eq) carefully at 0 °C. The cooling bath was removed after ca. 10 min and the mixture was stirred at rt overnight. The reaction mixture was then poured into water/ether (90 mL/30 mL) and shaken. The layers were separated and the aqueous phase was extracted with ether (3×30 mL). The combined organic extracts were washed with NaHCO<sub>3</sub> (sat. aq.) and CuSO<sub>4</sub> (sat. aq.) and the combined aqueous layers were re-extracted with ether (1×10 mL). The combined organic extracts were then dried over MgSO<sub>4</sub> and concentrated under reduced pressure. The crude product was purified by column chromatography (hexane/EtOAc 1:1) to afford **3** (44.4 mg, 87% wt along with EtOAc, 38.8 mg, 54%) as a pale yellow oil.

**TLC** (hexane/EtOAc, 1:1):  $R_f$  = 0.17

**$[\alpha]_D^{24}$**  = +208.2° ( $c$  = 0.172, CHCl<sub>3</sub>)

**<sup>1</sup>H-NMR** (400.1 MHz, CDCl<sub>3</sub>):  $\delta$  = 7.54 (s, 1H), 6.74 (ddd,  $J$  = 4.7 Hz,  $J$  = 11.0 Hz,  $J$  = 15.7 Hz, 1H), 6.62 (dd,  $J$  = 10.9 Hz,  $J$  = 15.2 Hz, 1H), 6.39 (d,  $J$  = 15.2 Hz, 1H), 6.26 (s, 1H), 6.22 (dd,  $J$  = 11.1 Hz,  $J$  = 15.3 Hz, 1H), 6.11 (d,  $J$  = 10.9 Hz, 1H), 5.79 (d,  $J$  = 11.0 Hz, 1H), 5.60 (dd,  $J$  = 0.7 Hz,  $J$  = 15.6 Hz, 1H), 5.14 (dd,  $J$  = 9.7 Hz,  $J$  = 15.2 Hz, 1H), 4.57 (dd,  $J$  = 3.0 Hz,  $J$  = 10.7 Hz, 1H), 3.90 (dd,  $J$  = 2.8 Hz,  $J$  = 10.9 Hz, 1H), 3.65 (ddd,  $J$  = 2.7 Hz,  $J$  = 8.1 Hz,  $J$  = 9.7 Hz, 1H), 3.25 (d,  $J$  = 9.3 Hz, 1H), 3.16 (s, 3H), 2.75 (ddd,  $J$  = 2.1 Hz,  $J$  = 5.2 Hz,  $J$  = 18.1 Hz, 1H), 2.56-2.48 (m, 1H), 2.46 (s, 3H), 2.30-2.23 (m, 2H), 2.16-2.11 (m, 1H), 2.14 (s, 3H), 2.07 (dd,  $J$  = 11.5 Hz,  $J$  = 18.0 Hz, 1H), 1.95 (ddd,  $J$  = 2.6 Hz,  $J$  = 5.1 Hz,  $J$  = 14.2 Hz, 1H), 1.89 (d,  $J$  = 0.7 Hz, 3H), 1.78 (d,  $J$  = 0.9 Hz, 3H), 1.75-1.66 (m, 3H), 1.18 (d,  $J$  = 6.4 Hz, 3H), 0.99 (d,  $J$  = 6.8 Hz, 3H), 0.67 (mc, 1H).

**$^{13}\text{C}$ -NMR** (100.6 MHz,  $\text{CDCl}_3$ ):  $\delta$  = 170.3, 165.6, 160.9, 145.9, 139.2, 137.4, 136.9, 136.8, 135.9, 134.4, 129.7, 129.3, 126.0, 124.5, 124.3, 120.6, 89.7, 83.2, 78.3, 74.2, 56.2, 45.3, 38.6, 38.2, 36.8, 34.5, 32.0, 29.8, 29.7, 16.5, 14.3, 13.8, 11.4, 10.9, 10.2.

**IR** (neat,  $\text{v}/\text{cm}^{-1}$ ): 3442, 2965, 2928, 2877, 2822, 1714 (s), 1649, 1580, 1450, 1382, 1322, 1252, 1222, 1168, 1109, 1078, 1040, 1019, 971, 889, 831, 754 (s), 662, 636, 593, 550, 511, 457, 436, 422.

**HRMS (ESI)**:  $m/z$  calcd. for  $\text{C}_{35}\text{H}_{47}\text{NNaO}_7$   $[\text{M}+\text{K}]^+$ : 616.3245; found: 616.3245.

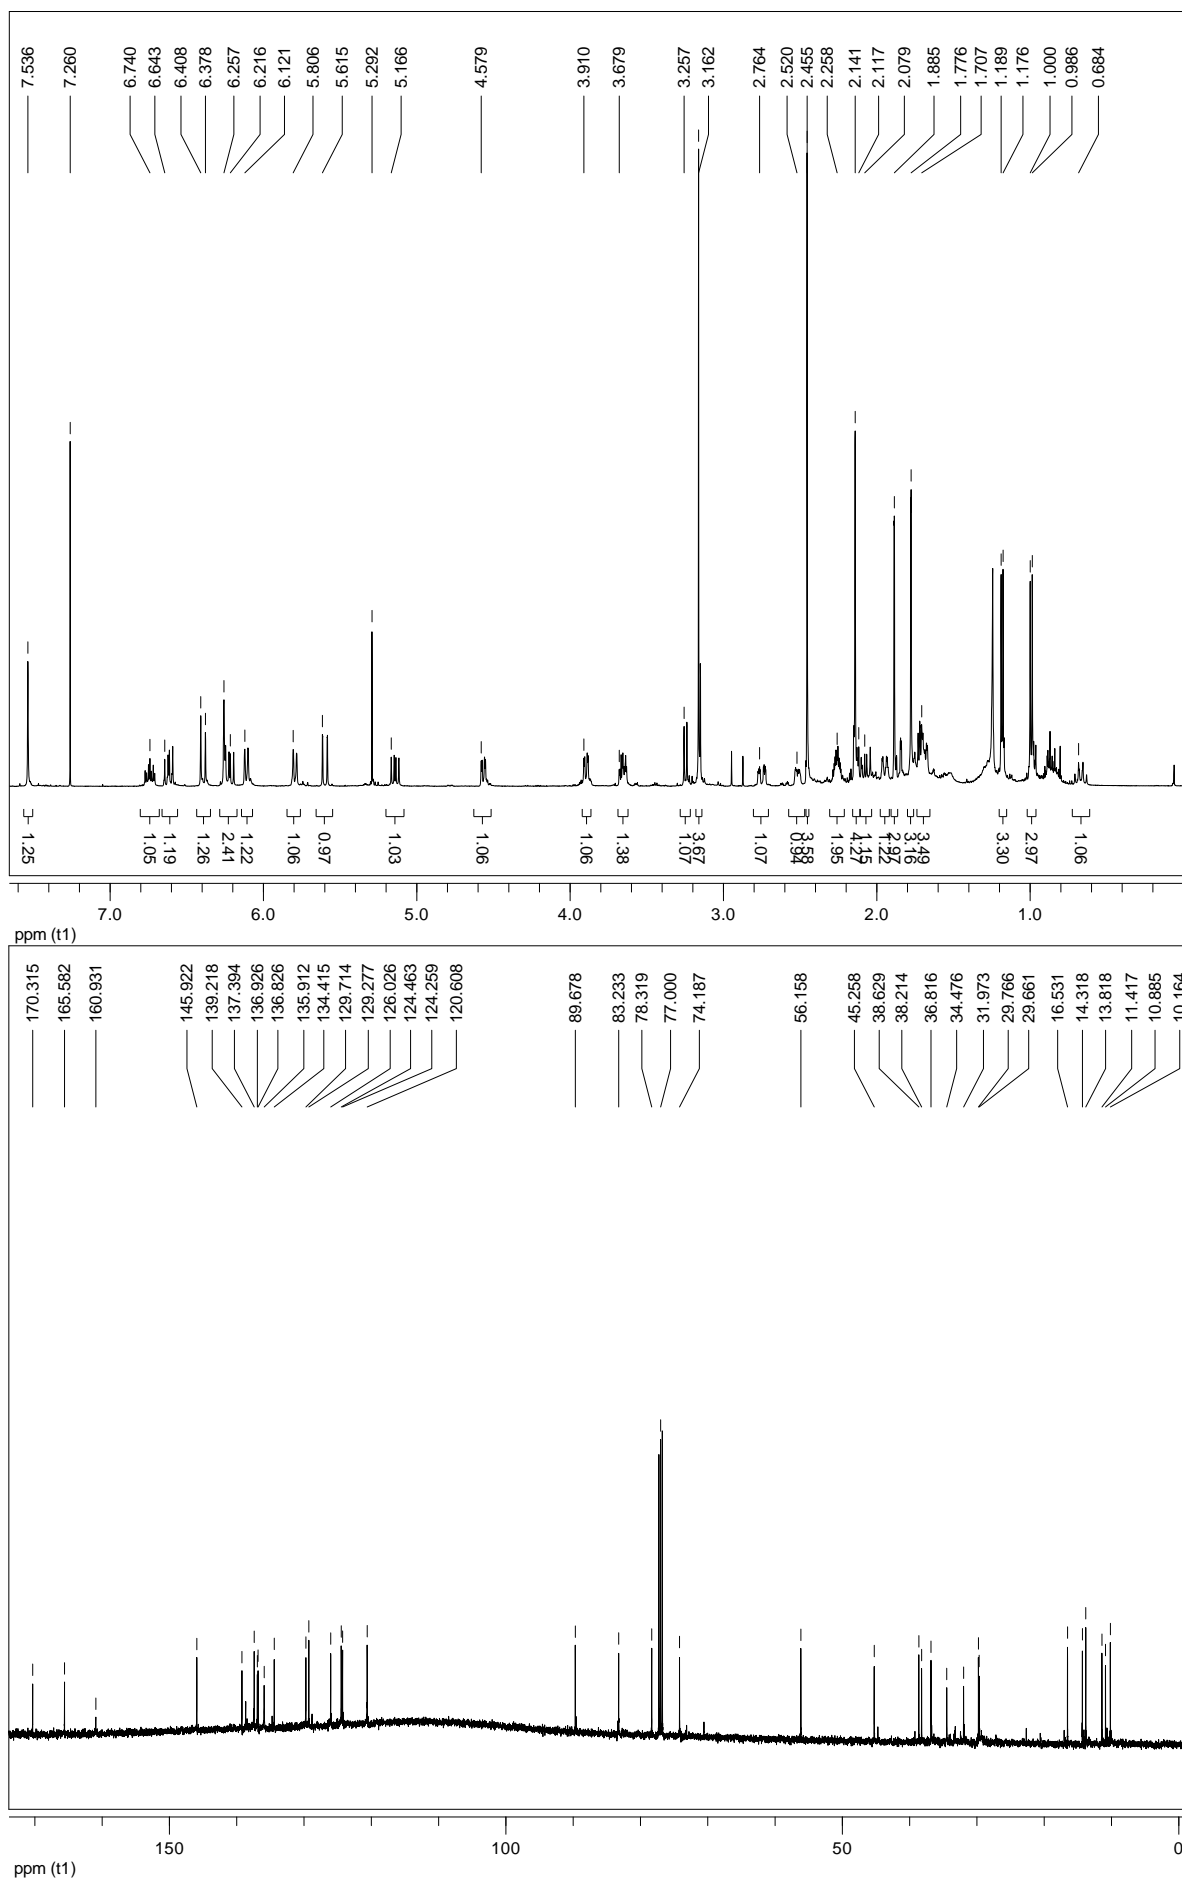

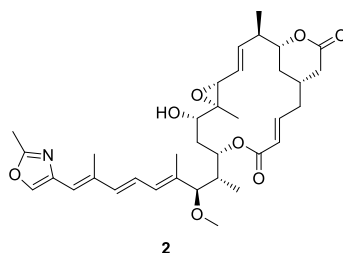

**(1*R*,3*E*,7*S*,9*S*,10*E*,12*E*,14*R*,15*R*)-9-Hydroxy-7-((2*S*,3*R*,4*E*,6*E*,8*E*)-3-methoxy-4,8-dimethyl-9-(2-methyloxazol-4-yl)nona-4,6,8-trien-2-yl)-10,14-dimethyl-6,16-dioxabicyclo[13.3.1]nonadeca-3,10,12-triene-5,17-dione (rhizoxin F) (2):** To a solution of **3** (38.8 mg, 65.3  $\mu$ mol, 1.00 eq) in benzene (3 mL) was added *t*-BuOOH (14.3  $\mu$ L 5.5 M in decane, 78.5  $\mu$ mol, 1.20 eq) at rt. The mixture was then cooled to 0 °C and a solution of VO(acac)<sub>2</sub> (0.87 mg, 5 mol%) in benzene (1 mL, flask rinsed with 2 $\times$ 0.2 mL) was added, resulting in a red coloring of the solution. The cooling bath was removed after 5-10 min and stirring was continued for 3 h. The colour of the mixture changed from red to pale yellow during this time. Then the reaction was quenched with sat. Na<sub>2</sub>S<sub>2</sub>O<sub>3</sub>, ether was added (10 mL) and the layers were separated. The aqueous phase was extracted with ether (3 $\times$ 10 mL) and the combined organic extracts were washed with brine, dried over MgSO<sub>4</sub>, filtered and concentrated *in vacuo*. The crude product was purified by column chromatography (hexane/EtOAc 1:1) to afford WF-1360F (**2**) (25.8 mg, 65%) as a pale yellow foam. Preparative HPLC delivered analytically pure **2** as a white foam (11.5 mg, 29%).

**[ $\alpha$ ]<sub>D</sub><sup>24</sup> = +119.60° (*c* = 0.110, CHCl<sub>3</sub>)**

**<sup>1</sup>H-NMR** (400.1 MHz, CDCl<sub>3</sub>):  $\delta$  = 7.53 (s, 1H), 6.82 (ddd, *J* = 5.1 Hz, *J* = 10.6 Hz, *J* = 15.7 Hz, 1H), 6.58 (dd, *J* = 10.8 Hz, *J* = 15.2 Hz, 1H), 6.37 (d, *J* = 15.2 Hz, 1H), 6.25 (bs, 1H), 6.09 (bd, *J* = 10.9 Hz, 1H), 5.68 (d, *J* = 15.6 Hz, 1H), 5.55 (dd, *J* = 9.9 Hz, *J* = 15.4 Hz, 1H), 5.34 (dd, *J* = 9.3 Hz, *J* = 15.4 Hz, 1H), 4.61 (dd, *J* = 3.0 Hz, *J* = 10.1 Hz, 1H), 3.74 (ddd, *J* = 2.6 Hz, *J* = 9.7 Hz, *J* = 12.0 Hz, 1H), 3.26 (d, *J* = 4.6 Hz, 1H), 3.24 (d, *J* = 4.7 Hz, 1H), 3.16 (s, 3H), 3.06 (dd, *J* = 2.1 Hz, *J* = 10.6 Hz, 1H), 2.78 (ddd, *J* = 1.6 Hz, *J* = 4.7 Hz, *J* = 6.8 Hz, 1H), 2.56 (dd, *J* = 4.6 Hz, *J* = 8.3 Hz, 1H), 2.46 (s, 3H), 2.43-2.28 (m, 2H), 2.14 (s, 3H), 2.13-2.03 (m, 2H), 1.96 (m<sub>c</sub>, 1H), 1.88 (s, 3H), 1.86-1.70 (m, 3H), 1.42 (s, 3H), 1.18 (d, *J* = 6.5 Hz, 3H), 1.00 (d, *J* = 6.8 Hz, 3H), 0.72 (m<sub>c</sub>, 1H).

**$^{13}\text{C}$ -NMR** (100.6 MHz,  $\text{CDCl}_3$ ):  $\delta$  = 169.9, 165.3, 160.9, 146.1, 140.2, 138.7, 137.6, 136.7, 136.5, 136.0, 129.4, 126.5, 124.8, 124.0, 120.7, 89.6, 82.3, 76.9, 74.8, 65.7, 64.9, 56.2, 45.0, 38.2, 37.9, 36.8, 33.9, 31.6, 29.6, 16.6, 14.3, 13.8, 12.2, 11.4, 9.9.

**IR** (neat,  $\text{v}/\text{cm}^{-1}$ ): 3462br, 2974, 2928, 2873, 2857, 1716s, 1650, 1580, 1448, 1383, 1309, 1293, 1252, 1226, 1200, 1170, 1110s, 1077s, 1043s, 981s, 966s, 954, 932, 878, 863, 845, 829, 735s, 702, 635, 547, 484, 446, 427, 406.

**HRMS (ESI)**:  $m/z$  calcd. for  $\text{C}_{35}\text{H}_{47}\text{NNaO}_8$   $[\text{M}+\text{Na}]^+$ : 632.3194; found: 632.3193.

**HPLC** (MeCN/ $\text{H}_2\text{O}$ , 40/60 $\rightarrow$ 90/10 in 15 min, 1 mL/min, 10  $\mu\text{L}$ ):  $t_r$  = 8.6 min.



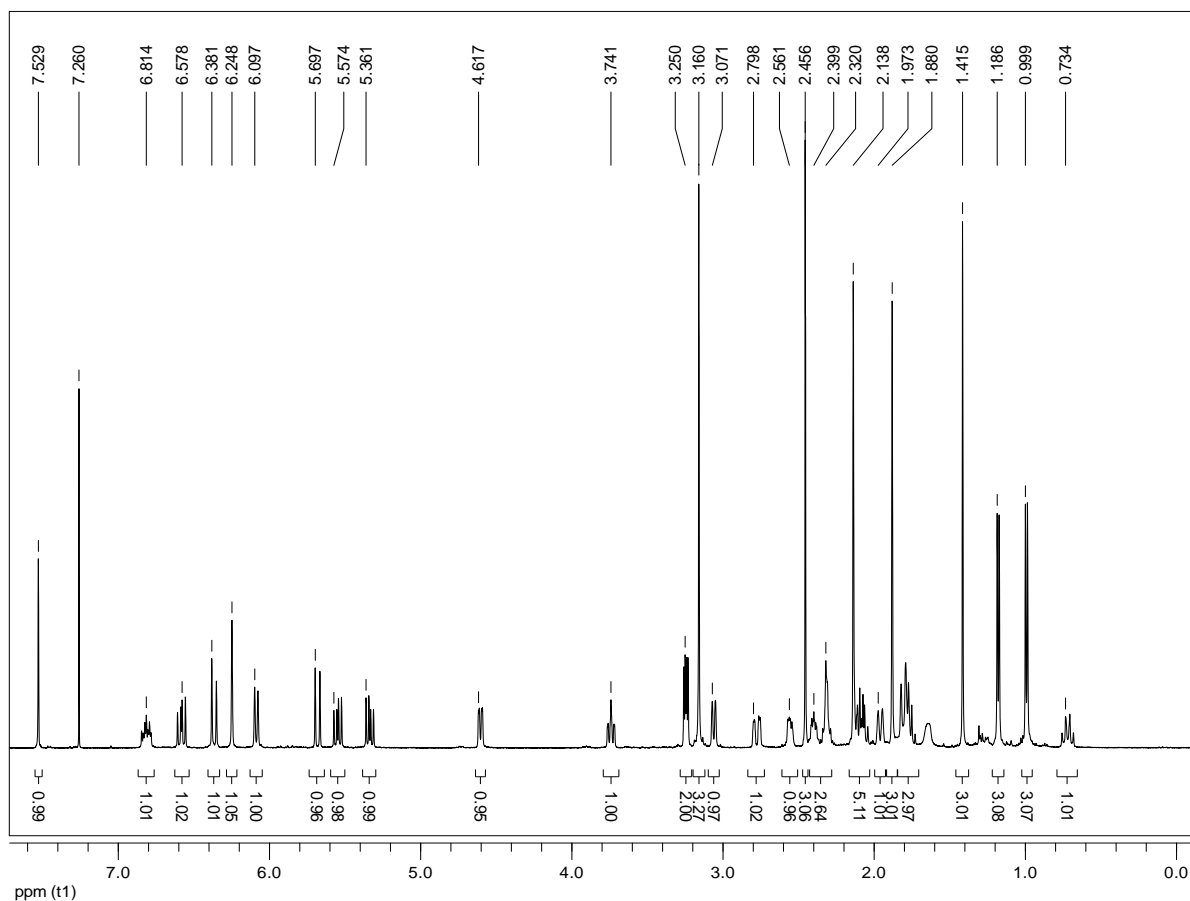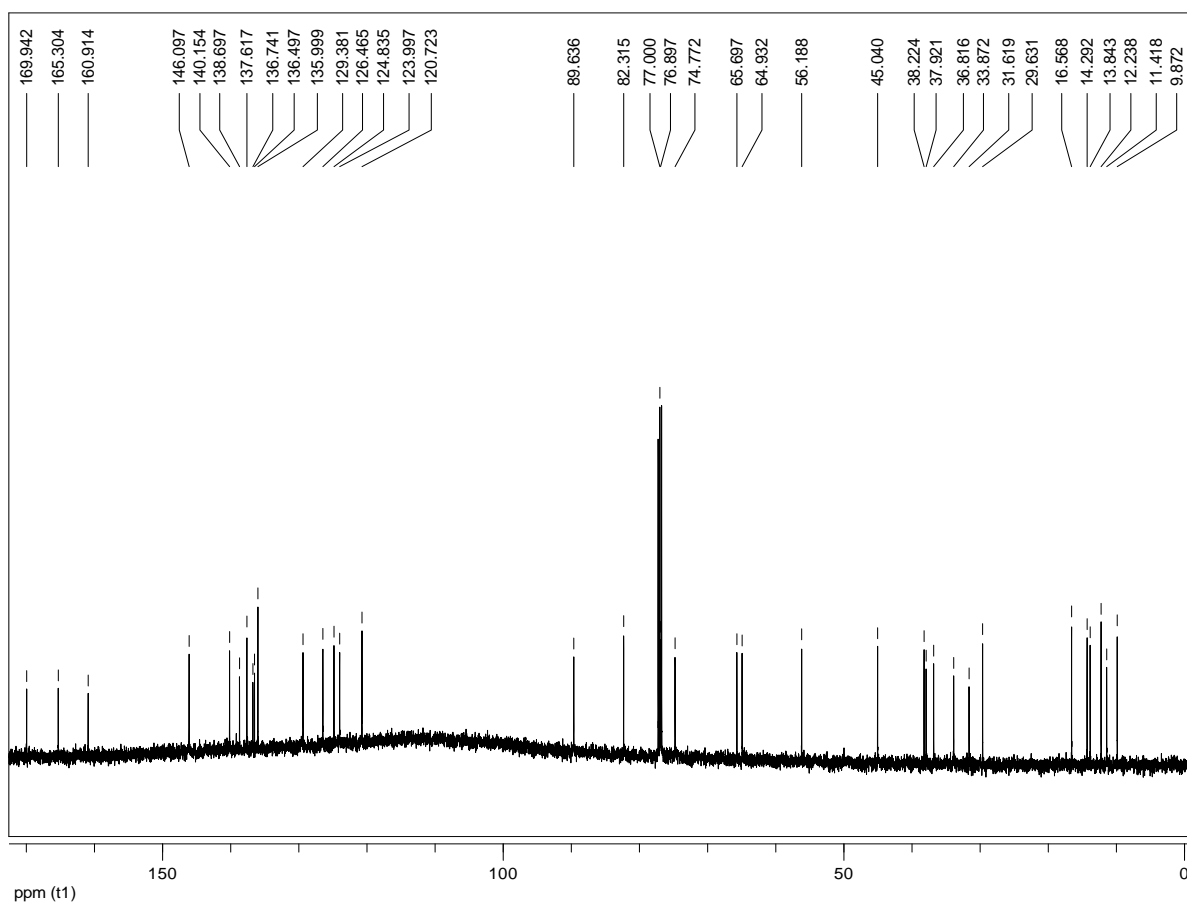

Supplement: s1 [file s1]
